# Supplementary material for: m6A-mRNA methylation regulates cardiac gene expression and cellular growth
Source: Life Sci Alliance. 2019 Apr 9;2(2):e201800233. doi: 10.26508/lsa.201800233 (PMC6458851; doi:10.26508/lsa.201800233)
Supplement: Supplementary file 1 [file LSA-2018-00233_TableS1.xlsx]

## Sheet: DCM
ID	logFC	logCPM	LR	PValue	FDR	description	hgnc_symbol	INPUT DCM 1	INPUT DCM 2	INPUT DCM 3	IP DCM1	IP DCM2	IP DCM3
ENSG00000258643	2.60274	-0.534125	26.4831	2.65854e-07	4.14427e-06	BCL2L2-PABPN1 readthrough [Source:HGNC Symbol;Acc:HGNC:42959]	BCL2L2-PABPN1	0.0575756	0.0861958	0.607718	0.647703	1.15707	1.35819
ENSG00000169894	2.42368	1.38984	42.6391	6.58313e-11	2.4196e-09	mucin 3A, cell surface associated [Source:HGNC Symbol;Acc:HGNC:7513]	MUC3A	0.633332	0.689566	0.816621	6.83874	1.63617	4.81682
ENSG00000102539	2.12273	-2.20075	17.3718	3.07354e-05	0.000255278	motilin receptor [Source:HGNC Symbol;Acc:HGNC:4495]	MLNR	0.0575756	0.0969702	0.0569736	0.227117	0.45198	0.260582
ENSG00000238227	2.09973	3.73561	24.2167	8.6084e-07	1.15914e-05	chromosome 9 open reading frame 69 [Source:HGNC Symbol;Acc:HGNC:31009]	C9orf69	5.73453	2.77981	5.1846	8.49585	35.7878	21.6994
ENSG00000249158	2.09187	-1.30226	3.15964	0.0754796	0.158693	protocadherin alpha 11 [Source:HGNC Symbol;Acc:HGNC:8665]	PCDHA11	0.345454	0.0430979	0.0664692	0.0504704	1.26554	0.513268
ENSG00000118160	2.02307	-2.02558	15.2394	9.47043e-05	0.000666214	solute carrier family 8 member A2 [Source:HGNC Symbol;Acc:HGNC:11069]	SLC8A2	0.0230303	0.129294	0.113947	0.227117	0.316386	0.489579
ENSG00000179242	1.94369	-0.616835	23.0906	1.54547e-06	1.94308e-05	cadherin 4 [Source:HGNC Symbol;Acc:HGNC:1763]	CDH4	0.126666	0.657243	0.123443	0.748644	1.40114	0.686989
ENSG00000251692	1.94018	-2.28685	9.2663	0.00233409	0.0097052	pentraxin 4 [Source:HGNC Symbol;Acc:HGNC:14171]	PTX4	0.0345454	0.118519	0.047478	0.538351	0.198871	0.134239
ENSG00000153093	1.93285	-1.51656	19.1861	1.18573e-05	0.000112968	acyl-CoA oxidase-like [Source:HGNC Symbol;Acc:HGNC:25621]	ACOXL	0.103636	0.237038	0.0759648	0.563586	0.614692	0.339546
ENSG00000167178	1.93024	1.88088	56.0135	7.19737e-14	4.35237e-12	immunoglobulin superfamily containing leucine rich repeat 2 [Source:HGNC Symbol;Acc:HGNC:29286]	ISLR2	0.264848	0.937379	3.57034	0.958937	4.43844	11.6235
ENSG00000271698	1.89004	-2.99665	7.73656	0.00541137	0.0192576			0.0115151	0.0430979	0.0664692	0.142999	0.0632772	0.268479
ENSG00000204978	1.85616	-1.36555	15.8618	6.81409e-05	0.000503206	glutamate rich 4 [Source:HGNC Symbol;Acc:HGNC:34497]	ERICH4	0.126666	0.0754213	0.227894	0.92529	0.180792	0.592232
ENSG00000053108	1.85074	-2.40854	12.3493	0.000441157	0.00241777	follistatin like 4 [Source:HGNC Symbol;Acc:HGNC:21389]	FSTL4	0.103636	0.0538724	0.0569736	0.285999	0.21695	0.260582
ENSG00000004776	1.81927	7.08607	95.3628	1.58506e-22	3.09763e-20	heat shock protein family B (small) member 6 [Source:HGNC Symbol;Acc:HGNC:26511]	HSPB6	61.0187	50.2198	61.503	314.456	143.079	184.674
ENSG00000175294	1.81301	-1.38527	12.622	0.000381231	0.00213237	cation channel sperm associated 1 [Source:HGNC Symbol;Acc:HGNC:17116]	CATSPER1	0.0460605	0.0754213	0.455789	0.43741	0.334465	0.750161
ENSG00000185156	1.78844	-2.52799	10.4104	0.00125311	0.00577373	major facilitator superfamily domain containing 6 like [Source:HGNC Symbol;Acc:HGNC:26656]	MFSD6L	0.0230303	0.107745	0.0759648	0.168235	0.271188	0.244789
ENSG00000117407	1.77412	-2.83795	8.21784	0.00414805	0.0156168	artemin [Source:HGNC Symbol;Acc:HGNC:727]	ARTN	0.0345454	0.0861958	0.0379824	0.201882	0.144634	0.189514
ENSG00000278299	1.77067	-0.231352	12.4046	0.000428283	0.00235755	TBC1 domain family member 3C [Source:HGNC Symbol;Acc:HGNC:24889]	TBC1D3C	0.414545	0.0430979	0.968551	0.933702	0.88588	1.65035
ENSG00000143473	1.75336	0.254443	23.9953	9.65695e-07	1.28047e-05	potassium voltage-gated channel subfamily H member 1 [Source:HGNC Symbol;Acc:HGNC:6250]	KCNH1	0.391514	0.301685	1.04452	1.80011	1.56385	1.83197
ENSG00000261221	1.73141	3.82138	99.9931	1.52929e-23	3.35711e-21	zinc finger protein 865 [Source:HGNC Symbol;Acc:HGNC:38705]	ZNF865	6.19514	6.28152	7.05523	23.7631	19.0735	22.2048
ENSG00000183793	1.72108	2.09068	3.55618	0.0593241	0.131344	nuclear pore complex interacting protein family member A5 [Source:HGNC Symbol;Acc:HGNC:41980]	NPIPA5	4.38726	4.44986	0.047478	6.56115	4.29381	5.66964
ENSG00000178974	1.70964	5.10124	25.6583	4.07549e-07	6.10942e-06	F-box protein 34 [Source:HGNC Symbol;Acc:HGNC:20201]	FBXO34	10.5248	41.9342	7.52051	55.4417	51.7517	38.5899
ENSG00000179796	1.70663	-2.39751	9.04826	0.00262945	0.0107219	leucine rich repeat containing 3B [Source:HGNC Symbol;Acc:HGNC:28105]	LRRC3B	0.0345454	0.0969702	0.0854604	0.168235	0.479099	0.134239
ENSG00000181027	1.70074	4.18621	76.5264	2.17284e-18	2.63786e-16	fukutin related protein [Source:HGNC Symbol;Acc:HGNC:17997]	FKRP	10.9969	9.91251	5.43148	26.5474	32.3166	23.8077
ENSG00000181408	1.70049	-0.517286	24.5287	7.32127e-07	1.0118e-05	urotensin 2 receptor [Source:HGNC Symbol;Acc:HGNC:4468]	UTS2R	0.253333	0.172392	0.484275	0.984172	0.433901	1.63456
ENSG00000182108	1.6992	4.25286	106.401	6.02269e-25	1.63582e-22	Dexi homolog [Source:HGNC Symbol;Acc:HGNC:13267]	DEXI	14.6703	7.73607	4.67183	47.0973	23.7199	16.2824
ENSG00000203618	1.66547	2.22918	55.495	9.3698e-14	5.47996e-12	glycoprotein Ib platelet beta subunit [Source:HGNC Symbol;Acc:HGNC:4440]	GP1BB	1.76181	2.43503	2.47835	5.64427	8.4701	7.11468
ENSG00000187902	1.65589	-2.53957	8.46904	0.00361242	0.0139257	shisa family member 7 [Source:HGNC Symbol;Acc:HGNC:35409]	SHISA7	0.103636	0.0754213	0.0379824	0.19347	0.207911	0.268479
ENSG00000261611	1.62602	1.63576	15.1778	9.78491e-05	0.000685345			1.53151	0.732664	2.49734	5.27415	5.51415	2.8822
ENSG00000156097	1.61934	-0.591923	18.1937	1.9954e-05	0.000176177	G protein-coupled receptor 61 [Source:HGNC Symbol;Acc:HGNC:13300]	GPR61	0.287878	0.118519	0.598223	1.04305	0.596613	1.12919
ENSG00000183153	1.60013	-0.834215	20.6927	5.39218e-06	5.74151e-05	gap junction protein delta 3 [Source:HGNC Symbol;Acc:HGNC:19147]	GJD3	0.253333	0.226264	0.303859	0.723409	0.687009	0.979157
ENSG00000183208	1.57371	2.13994	18.7115	1.52063e-05	0.000139966	GDP-D-glucose phosphorylase 1 [Source:HGNC Symbol;Acc:HGNC:34360]	GDPGP1	1.32424	1.27139	5.20359	5.70315	6.44523	6.26187
ENSG00000160685	1.56489	4.64643	86.7931	1.20492e-20	2.0325e-18	zinc finger and BTB domain containing 7B [Source:HGNC Symbol;Acc:HGNC:18668]	ZBTB7B	13.7375	14.0499	10.0653	33.689	46.2014	32.3122
ENSG00000164061	1.56197	2.88579	56.5362	5.51732e-14	3.36179e-12	bassoon presynaptic cytomatrix protein [Source:HGNC Symbol;Acc:HGNC:1117]	BSN	2.72908	4.0512	4.5389	10.4894	11.0916	11.2129
ENSG00000026559	1.54928	-1.58466	12.5412	0.000398069	0.00221572	potassium voltage-gated channel modifier subfamily G member 1 [Source:HGNC Symbol;Acc:HGNC:6248]	KCNG1	0.0575756	0.161617	0.265877	0.277587	0.461019	0.600129
ENSG00000167971	1.54345	0.75098	32.1015	1.46325e-08	3.16872e-07	CASK interacting protein 1 [Source:HGNC Symbol;Acc:HGNC:20879]	CASKIN1	0.978786	0.958928	0.569736	3.42357	2.23278	1.73721
ENSG00000159289	1.54234	-3.9736	3.65941	0.0557533	0.125063	golgin A6 family member A [Source:HGNC Symbol;Acc:HGNC:13567]	GOLGA6A	0.0230303	0.0215489	0.0189912	0.0420587	0.090396	0.0631714
ENSG00000076826	1.54218	-0.600461	17.5383	2.81573e-05	0.000236861	calmodulin regulated spectrin associated protein family member 3 [Source:HGNC Symbol;Acc:HGNC:29307]	CAMSAP3	0.195757	0.592596	0.23739	0.698174	1.09379	0.963364
ENSG00000257529	1.53953	2.7193	8.04295	0.00456811	0.0168517	RPL36A-HNRNPH2 readthrough [Source:HGNC Symbol;Acc:HGNC:48349]	RPL36A-HNRNPH2	0.863634	11.0654	0.332346	13.1896	13.3786	0.536957
ENSG00000167525	1.53905	0.0955803	9.75521	0.00178816	0.00781861	protein interacting with cyclin A1 [Source:HGNC Symbol;Acc:HGNC:28600]	PROCA1	0.230303	0.484851	1.00653	1.76646	1.826	0.900193
ENSG00000149654	1.53746	-1.69182	6.46514	0.0110011	0.0346148	cadherin 22 [Source:HGNC Symbol;Acc:HGNC:13251]	CDH22	0.0460605	0.247813	0.15193	0.546762	0.22599	0.465889
ENSG00000187726	1.53002	-2.87109	6.13913	0.0132223	0.0400542	DnaJ heat shock protein family (Hsp40) member B13 [Source:HGNC Symbol;Acc:HGNC:30718]	DNAJB13	0.0230303	0.0646468	0.0854604	0.19347	0.117515	0.189514
ENSG00000204060	1.52642	0.163217	25.5377	4.33823e-07	6.43109e-06	forkhead box O6 [Source:HGNC Symbol;Acc:HGNC:24814]	FOXO6	0.379999	0.829634	0.512762	1.5057	1.86216	1.43715
ENSG00000186687	1.52412	4.85566	63.7417	1.41846e-15	1.14802e-13	LYR motif containing 7 [Source:HGNC Symbol;Acc:HGNC:28072]	LYRM7	13.0121	15.5691	15.7722	52.4051	42.5584	34.1757
ENSG00000266076	1.52048	-0.925845	16.5457	4.74911e-05	0.000369798			0.172727	0.366332	0.23739	0.504704	0.804524	0.892297
ENSG00000239389	1.5198	-0.379911	18.2563	1.93085e-05	0.000171423	protocadherin alpha 13 [Source:HGNC Symbol;Acc:HGNC:8667]	PCDHA13	0.0806059	0.484851	0.664692	0.428998	1.42826	1.3266
ENSG00000179673	1.51797	-1.89669	6.17206	0.0129783	0.039457	reprimo like [Source:HGNC Symbol;Acc:HGNC:32422]	RPRML	0.172727	0.226264	0.0189912	0.185058	0.533336	0.339546
ENSG00000185652	1.51247	-0.670448	15.8234	6.95363e-05	0.000512095	neurotrophin 3 [Source:HGNC Symbol;Acc:HGNC:8023]	NTF3	0.184242	0.140068	0.683683	0.815938	0.45198	1.27922
ENSG00000184221	1.50336	-3.42726	4.69368	0.0302737	0.0771404	oligodendrocyte transcription factor 1 [Source:HGNC Symbol;Acc:HGNC:16983]	OLIG1	0.0575756	0.0323234	0.0189912	0.185058	0.0813564	0.055275
ENSG00000175946	1.50225	4.25441	53.6878	2.35018e-13	1.27666e-11	kelch like family member 38 [Source:HGNC Symbol;Acc:HGNC:34435]	KLHL38	8.52119	6.36771	14.3194	36.4564	14.0837	34.4995
ENSG00000178913	1.49882	6.86187	8.80734	0.00300021	0.0119479	TATA-box binding protein associated factor 7 [Source:HGNC Symbol;Acc:HGNC:11541]	TAF7	124.006	109.081	8.94485	149.586	179.237	126.888
ENSG00000166342	1.49843	-3.33498	4.5286	0.0333329	0.0834886	neuropilin and tolloid like 1 [Source:HGNC Symbol;Acc:HGNC:13823]	NETO1	0.0806059	0.0323234	0.0094956	0.227117	0.0542376	0.0631714
ENSG00000177464	1.48968	1.77342	40.42	2.04836e-10	6.69896e-09	G protein-coupled receptor 4 [Source:HGNC Symbol;Acc:HGNC:4497]	GPR4	2.16484	1.27139	1.92761	5.68633	3.86895	5.36957
ENSG00000198354	1.48145	-2.99648	5.58877	0.018076	0.0515422	DDB1 and CUL4 associated factor 12 like 2 [Source:HGNC Symbol;Acc:HGNC:32950]	DCAF12L2	0.0690908	0.0323234	0.0569736	0.168235	0.198871	0.0947572
ENSG00000131398	1.47427	1.07358	23.5724	1.20302e-06	1.56101e-05	potassium voltage-gated channel subfamily C member 3 [Source:HGNC Symbol;Acc:HGNC:6235]	KCNC3	0.748483	1.5623	1.05401	3.12916	2.59436	3.3244
ENSG00000162975	1.46339	-0.445771	14.4577	0.000143344	0.000943365	potassium voltage-gated channel modifier subfamily F member 1 [Source:HGNC Symbol;Acc:HGNC:6246]	KCNF1	0.092121	1.17442	0.0854604	0.277587	2.24182	0.410614
ENSG00000069696	1.45217	-0.637127	16.4109	5.09903e-05	0.000393983	dopamine receptor D4 [Source:HGNC Symbol;Acc:HGNC:3025]	DRD4	0.195757	0.452528	0.351337	0.740232	0.822603	1.1055
ENSG00000270149	1.44997	-1.594	3.0027	0.0831258	0.171242			0.0575756	0.118519	0.0664692	0.100941	0.0632772	1.35029
ENSG00000100146	1.44953	-2.89116	4.12221	0.0423237	0.100524	SRY-box 10 [Source:HGNC Symbol;Acc:HGNC:11190]	SOX10	0.0345454	0.0107745	0.132938	0.277587	0.0271188	0.173721
ENSG00000103241	1.44877	-1.94149	9.32505	0.00226042	0.00946516	forkhead box F1 [Source:HGNC Symbol;Acc:HGNC:3809]	FOXF1	0.0575756	0.172392	0.142434	0.168235	0.343505	0.513268
ENSG00000126243	1.44764	2.49951	42.0268	9.00323e-11	3.22767e-09	leucine rich repeat and fibronectin type III domain containing 3 [Source:HGNC Symbol;Acc:HGNC:28370]	LRFN3	3.45454	2.98453	2.61129	7.11632	9.31078	8.24387
ENSG00000165204	1.44683	-1.69567	8.38119	0.00379123	0.0145137	olfactory receptor family 1 subfamily K member 1 [Source:HGNC Symbol;Acc:HGNC:8212]	OR1K1	0.0690908	0.247813	0.15193	0.395351	0.307346	0.513268
ENSG00000137273	1.4422	-1.9472	8.49201	0.0035671	0.0137908	forkhead box F2 [Source:HGNC Symbol;Acc:HGNC:3810]	FOXF2	0.184242	0.0754213	0.123443	0.285999	0.406782	0.33165
ENSG00000180815	1.43935	-2.38285	7.84664	0.00509153	0.0183435	mitogen-activated protein kinase kinase kinase 15 [Source:HGNC Symbol;Acc:HGNC:31689]	MAP3K15	0.092121	0.129294	0.047478	0.302822	0.334465	0.11055
ENSG00000177300	1.43414	-3.0154	4.3822	0.0363161	0.0893407	claudin 22 [Source:HGNC Symbol;Acc:HGNC:2044]	CLDN22	0.0115151	0.140068	0.0379824	0.100941	0.153673	0.165825
ENSG00000186174	1.43263	5.66282	53.7039	2.33104e-13	1.27058e-11	B-cell CLL/lymphoma 9-like [Source:HGNC Symbol;Acc:HGNC:23688]	BCL9L	20.1975	36.9026	26.1699	82.2247	78.3643	59.8944
ENSG00000100156	1.4211	0.392494	26.48	2.66287e-07	4.14699e-06	solute carrier family 16 member 8 [Source:HGNC Symbol;Acc:HGNC:16270]	SLC16A8	0.679392	0.754213	0.655196	1.78329	1.96159	1.84776
ENSG00000255302	1.42062	8.06743	2.94587	0.0860975	0.175916	EP300 interacting inhibitor of differentiation 1 [Source:HGNC Symbol;Acc:HGNC:1191]	EID1	331.624	7.6822	269.941	311.47	392.843	295.777
ENSG00000126705	1.42015	5.6761	73.8364	8.48657e-18	9.18901e-16	AT-hook DNA binding motif containing 1 [Source:HGNC Symbol;Acc:HGNC:25230]	AHDC1	23.3642	35.8898	24.9259	77.5393	80.8773	63.969
ENSG00000215915	1.41402	-0.420232	17.9352	2.28559e-05	0.000198472	ATPase family, AAA domain containing 3C [Source:HGNC Symbol;Acc:HGNC:32151]	ATAD3C	0.44909	0.398655	0.32285	1.05147	0.858762	1.21605
ENSG00000081277	1.40837	-1.21959	6.43308	0.0112014	0.0350794	plakophilin 1 [Source:HGNC Symbol;Acc:HGNC:9023]	PKP1	0.0690908	0.829634	0.0664692	0.353293	0.750286	0.386925
ENSG00000175707	1.40554	-1.73473	7.34548	0.00672317	0.0229671	keratinocyte differentiation factor 1 [Source:HGNC Symbol;Acc:HGNC:26624]	KDF1	0.0690908	0.0861958	0.341842	0.235528	0.479099	0.426407
ENSG00000188086	1.387	2.99271	46.7749	7.96267e-12	3.38466e-10	protease, serine 45 [Source:HGNC Symbol;Acc:HGNC:30717]	PRSS45	4.96302	6.51855	2.14601	10.7754	15.7741	7.40685
ENSG00000173662	1.36473	-1.36564	9.48174	0.00207526	0.00883062	taste 1 receptor member 1 [Source:HGNC Symbol;Acc:HGNC:14448]	TAS1R1	0.264848	0.269362	0.094956	0.63088	0.406782	0.505371
ENSG00000136274	1.362	2.51563	33.5385	6.98655e-09	1.63206e-07	NAC alpha domain containing [Source:HGNC Symbol;Acc:HGNC:22196]	NACAD	2.41818	3.01685	4.07361	8.80708	5.76726	9.98898
ENSG00000139718	1.35591	4.6924	46.9563	7.2589e-12	3.11026e-10	SET domain containing 1B [Source:HGNC Symbol;Acc:HGNC:29187]	SETD1B	11.1121	16.3556	16.152	39.9137	29.5143	41.8511
ENSG00000181392	1.35555	-1.63084	8.9688	0.00274628	0.0111022	spectrin repeat containing nuclear envelope family member 4 [Source:HGNC Symbol;Acc:HGNC:26703]	SYNE4	0.115151	0.140068	0.218399	0.168235	0.569494	0.560646
ENSG00000109610	1.35157	4.42811	68.0238	1.6153e-16	1.42226e-14	superoxide dismutase 3 [Source:HGNC Symbol;Acc:HGNC:11181]	SOD3	13.3345	11.227	11.4327	38.8201	27.2001	26.9347
ENSG00000174807	1.34718	2.98997	46.5755	8.8156e-12	3.71763e-10	CD248 molecule [Source:HGNC Symbol;Acc:HGNC:18219]	CD248	2.56787	6.10912	4.90922	7.22568	12.4023	14.2294
ENSG00000085644	1.34495	3.13347	51.6084	6.77511e-13	3.36133e-11	zinc finger protein 213 [Source:HGNC Symbol;Acc:HGNC:13005]	ZNF213	5.51575	6.0337	3.41842	11.768	15.4215	10.3048
ENSG00000204882	1.34357	-0.349876	18.1554	2.03595e-05	0.000179166	G protein-coupled receptor 20 [Source:HGNC Symbol;Acc:HGNC:4475]	GPR20	0.368484	0.398655	0.503267	0.832761	1.11187	1.30291
ENSG00000115596	1.34255	0.314494	18.5214	1.68011e-05	0.000152802	Wnt family member 6 [Source:HGNC Symbol;Acc:HGNC:12785]	WNT6	0.460605	0.646468	0.835613	0.731821	2.2599	2.32155
ENSG00000154485	1.33931	-2.4804	4.1879	0.0407136	0.0975822	matrix metallopeptidase 21 [Source:HGNC Symbol;Acc:HGNC:14357]	MMP21	0.0460605	0.0538724	0.142434	0.100941	0.45198	0.142136
ENSG00000132819	1.33911	4.30177	18.3098	1.87737e-05	0.000167324	RNA binding motif protein 38 [Source:HGNC Symbol;Acc:HGNC:15818]	RBM38	10.7436	9.42766	9.35316	13.8457	20.9267	53.7747
ENSG00000244020	1.33322	-1.6028	9.38498	0.0021877	0.00920396	metallothionein 1H like 1 [Source:HGNC Symbol;Acc:HGNC:31864]	MT1HL1	0.299393	0.150843	0.094956	0.504704	0.45198	0.33165
ENSG00000126464	1.33066	4.68308	46.0062	1.17878e-11	4.88768e-10	proline rich 12 [Source:HGNC Symbol;Acc:HGNC:29217]	PRR12	10.3982	15.7415	18.2126	38.3743	30.816	40.3587
ENSG00000130940	1.3228	6.23278	86.3419	1.51368e-20	2.47518e-18	castor zinc finger 1 [Source:HGNC Symbol;Acc:HGNC:26002]	CASZ1	46.8666	38.3571	43.3664	124.065	98.857	99.5108
ENSG00000185453	1.32055	3.00376	44.839	2.1392e-11	8.52414e-10	chromosome 19 open reading frame 68 [Source:HGNC Symbol;Acc:HGNC:34495]	C19orf68	4.47938	4.67612	4.44394	12.2811	9.17519	12.8475
ENSG00000108557	1.31642	5.56165	70.1925	5.37916e-17	5.13102e-15	retinoic acid induced 1 [Source:HGNC Symbol;Acc:HGNC:9834]	RAI1	22.7309	28.9187	29.8637	65.4517	68.1947	68.0041
ENSG00000116254	1.31279	0.207276	19.4425	1.03675e-05	0.000101552	chromodomain helicase DNA binding protein 5 [Source:HGNC Symbol;Acc:HGNC:16816]	CHD5	0.172727	1.14209	0.702674	0.546762	2.38645	1.79249
ENSG00000177354	1.30724	7.99693	69.1977	8.90707e-17	8.20321e-15	chromosome 10 open reading frame 71 [Source:HGNC Symbol;Acc:HGNC:26973]	C10orf71	123.995	184.653	133.783	391.373	406.944	291.781
ENSG00000198763	1.30637	9.75106	29.0351	7.10775e-08	1.30921e-06	mitochondrially encoded NADH:ubiquinone oxidoreductase core subunit 2 [Source:HGNC Symbol;Acc:HGNC:7456]	MT-ND2	527.75	478.451	333.989	2348.76	677.183	803.92
ENSG00000146670	1.29965	-1.64622	8.46361	0.00362323	0.0139573	cell division cycle associated 5 [Source:HGNC Symbol;Acc:HGNC:14626]	CDCA5	0.0690908	0.323234	0.15193	0.302822	0.542376	0.379029
ENSG00000261582	1.2991	-2.22725	7.39604	0.00653677	0.0224384			0.103636	0.107745	0.113947	0.218705	0.307346	0.284271
ENSG00000185985	1.29865	0.24128	15.3216	9.06729e-05	0.000641799	SLIT and NTRK like family member 2 [Source:HGNC Symbol;Acc:HGNC:13449]	SLITRK2	0.230303	1.0128	0.864099	1.05147	2.39549	1.35819
ENSG00000126500	1.2974	1.91806	22.2827	2.35312e-06	2.7727e-05	fibronectin leucine rich transmembrane protein 1 [Source:HGNC Symbol;Acc:HGNC:3760]	FLRT1	2.00363	2.76904	1.70921	6.99015	4.21245	4.78524
ENSG00000085185	1.29111	2.93203	34.4723	4.32359e-09	1.07586e-07	BCL6 corepressor-like 1 [Source:HGNC Symbol;Acc:HGNC:25657]	BCORL1	3.7309	4.36366	5.07065	13.1812	9.74468	9.48361
ENSG00000272896	1.28939	-1.28003	10.4527	0.00122473	0.00567072			0.241818	0.0969702	0.351337	0.571998	0.352544	0.679093
ENSG00000108219	1.28921	4.89931	62.7962	2.29239e-15	1.76613e-13	tetraspanin 14 [Source:HGNC Symbol;Acc:HGNC:23303]	TSPAN14	19.4836	18.6829	13.987	47.8796	39.9369	38.882
ENSG00000126461	1.28753	5.73516	68.4126	1.3263e-16	1.19405e-14	SR-related CTD associated factor 1 [Source:HGNC Symbol;Acc:HGNC:30403]	SCAF1	31.6321	27.3995	34.0322	74.4606	75.9597	75.9005
ENSG00000258674	1.28606	-0.0313253	10.3562	0.00129041	0.00592856			0.299393	0.452528	0.816621	1.66552	0.515257	1.89514
ENSG00000024422	1.27862	5.36004	67.2522	2.38903e-16	2.05829e-14	EH domain containing 2 [Source:HGNC Symbol;Acc:HGNC:3243]	EHD2	19.6678	24.9321	27.5942	52.5733	57.7811	63.6531
ENSG00000276043	1.27735	1.49222	24.9397	5.91532e-07	8.33712e-06	ubiquitin like with PHD and ring finger domains 1 [Source:HGNC Symbol;Acc:HGNC:12556]	UHRF1	1.38182	1.4761	1.99408	4.5171	3.02826	4.26407
ENSG00000183779	1.27463	3.18438	37.0262	1.16552e-09	3.23139e-08	zinc finger protein 703 [Source:HGNC Symbol;Acc:HGNC:25883]	ZNF703	5.81514	6.48623	3.28548	19.4227	11.4441	7.89643
ENSG00000146216	1.27441	-1.13634	10.6216	0.00111776	0.00526826	tau tubulin kinase 1 [Source:HGNC Symbol;Acc:HGNC:19140]	TTBK1	0.276363	0.452528	0.0569736	0.605645	1.02147	0.189514
ENSG00000138622	1.27289	3.19517	46.9973	7.10845e-12	3.05396e-10	hyperpolarization activated cyclic nucleotide gated potassium channel 4 [Source:HGNC Symbol;Acc:HGNC:16882]	HCN4	6.55211	3.49093	6.0392	17.0085	9.3831	12.2632
ENSG00000101222	1.26986	-2.27841	5.96632	0.0145816	0.0434494	sperm flagellar 1 [Source:HGNC Symbol;Acc:HGNC:15874]	SPEF1	0.0575756	0.0538724	0.227894	0.185058	0.189831	0.363236
ENSG00000100014	1.26983	5.8849	30.954	2.64215e-08	5.38683e-07	sperm antigen with calponin homology and coiled-coil domains 1 like [Source:HGNC Symbol;Acc:HGNC:29022]	SPECC1L	32.9908	34.6938	29.8542	104.162	112.136	40.5245
ENSG00000157933	1.26894	5.95137	57.2489	3.84e-14	2.36677e-12	SKI proto-oncogene [Source:HGNC Symbol;Acc:HGNC:10896]	SKI	28.5575	42.473	38.8085	88.1718	84.936	88.1084
ENSG00000140279	1.26551	-0.139797	16.6633	4.46362e-05	0.000351009	dual oxidase 2 [Source:HGNC Symbol;Acc:HGNC:13273]	DUOX2	0.610302	0.527949	0.417806	1.12717	1.37402	1.21605
ENSG00000141837	1.26533	0.449994	15.0641	0.000103919	0.000721206	calcium voltage-gated channel subunit alpha1 A [Source:HGNC Symbol;Acc:HGNC:1388]	CACNA1A	0.414545	1.21752	0.835613	1.70758	1.78984	2.03728
ENSG00000166090	1.2605	-0.946456	10.9253	0.000948578	0.00460228	interleukin 25 [Source:HGNC Symbol;Acc:HGNC:13765]	IL25	0.345454	0.355558	0.123443	1.04305	0.90396	0.197411
ENSG00000172987	1.25804	-2.4691	3.28391	0.0699621	0.149267	heparanase 2 (inactive) [Source:HGNC Symbol;Acc:HGNC:18374]	HPSE2	0.103636	0.0538724	0.0569736	0.100941	0.0723168	0.529061
ENSG00000119457	1.25672	-0.789339	9.93231	0.00162403	0.00722116	solute carrier family 46 member 2 [Source:HGNC Symbol;Acc:HGNC:16055]	SLC46A2	0.218787	0.269362	0.503267	0.92529	0.696049	0.679093
ENSG00000259916	1.25469	-2.28913	5.84604	0.0156122	0.0459055			0.149697	0.0323234	0.123443	0.395351	0.0542376	0.315857
ENSG00000113430	1.25417	3.8179	41.9146	9.53496e-11	3.39551e-09	iroquois homeobox 4 [Source:HGNC Symbol;Acc:HGNC:6129]	IRX4	13.4036	6.44313	5.98223	23.679	20.1945	14.7347
ENSG00000147536	1.25375	-0.294655	6.99387	0.00817895	0.0270321	GINS complex subunit 4 [Source:HGNC Symbol;Acc:HGNC:28226]	GINS4	0.322424	0.980477	0.218399	0.698174	0.967237	1.53191
ENSG00000100433	1.25151	-2.84534	4.47233	0.034448	0.0857277	potassium two pore domain channel subfamily K member 10 [Source:HGNC Symbol;Acc:HGNC:6273]	KCNK10	0.149697	0.0215489	0.047478	0.285999	0.0813564	0.118446
ENSG00000185684	1.25108	3.96094	33.6337	6.65305e-09	1.57618e-07	EP400 N-terminal like [Source:HGNC Symbol;Acc:HGNC:26602]	EP400NL	10.2945	5.32259	13.1514	20.8947	20.1583	23.3971
ENSG00000166317	1.24966	9.04859	60.0718	9.14587e-15	6.54297e-13	synaptopodin 2 like [Source:HGNC Symbol;Acc:HGNC:23532]	SYNPO2L	257.605	477.675	189.798	800.469	1092.16	359.351
ENSG00000234438	1.2467	1.53886	22.9697	1.64574e-06	2.05636e-05	kelch repeat and BTB domain containing 13 [Source:HGNC Symbol;Acc:HGNC:37227]	KBTBD13	1.72727	1.21752	2.14601	2.97775	3.78759	5.36168
ENSG00000204175	1.24609	-1.64754	8.02913	0.00460309	0.0169301	G protein regulated inducer of neurite outgrowth 2 [Source:HGNC Symbol;Acc:HGNC:23730]	GPRIN2	0.092121	0.31246	0.113947	0.151411	0.741247	0.363236
ENSG00000127580	1.24309	3.49957	52.5216	4.2555e-13	2.18572e-11	WD repeat domain 24 [Source:HGNC Symbol;Acc:HGNC:20852]	WDR24	6.82847	5.6135	7.74841	15.5533	15.1956	16.7088
ENSG00000100197	1.2422	1.31428	24.26	8.41693e-07	1.13728e-05	cytochrome P450 family 2 subfamily D member 6 [Source:HGNC Symbol;Acc:HGNC:2625]	CYP2D6	1.24363	1.13132	1.91811	3.34787	2.1695	4.87999
ENSG00000065802	1.24171	5.42889	3.08679	0.0789302	0.16447	ankyrin repeat and SOCS box containing 1 [Source:HGNC Symbol;Acc:HGNC:16011]	ASB1	13.1733	86.9607	9.67601	69.2874	21.8849	57.336
ENSG00000255192	1.23438	-1.90975	6.57714	0.0103297	0.0327788	Nanog homeobox pseudogene 8 [Source:HGNC Symbol;Acc:HGNC:23106]	NANOGP8	0.126666	0.0969702	0.199408	0.48788	0.253109	0.276375
ENSG00000186111	1.23415	5.70608	62.4913	2.67627e-15	2.03257e-13	phosphatidylinositol-4-phosphate 5-kinase type 1 gamma [Source:HGNC Symbol;Acc:HGNC:8996]	PIP5K1C	31.3211	34.543	27.2524	84.4033	74.1699	61.3316
ENSG00000186326	1.23359	2.52746	35.8998	2.07732e-09	5.54819e-08	regulator of G-protein signaling 9 binding protein [Source:HGNC Symbol;Acc:HGNC:30304]	RGS9BP	4.2606	1.27139	4.82376	10.1614	3.15482	10.6839
ENSG00000261150	1.23297	2.99282	40.832	1.65896e-10	5.5968e-09	epiplakin 1 [Source:HGNC Symbol;Acc:HGNC:15577]	EPPK1	0.932725	10.2896	2.95313	2.0104	23.8555	7.55688
ENSG00000105737	1.232	2.00994	22.5572	2.03978e-06	2.45585e-05	glutamate ionotropic receptor kainate type subunit 5 [Source:HGNC Symbol;Acc:HGNC:4583]	GRIK5	2.34909	1.12054	3.33295	8.19303	1.95255	6.97255
ENSG00000204519	1.23095	2.33673	10.9868	0.000917612	0.00447224	zinc finger protein 551 [Source:HGNC Symbol;Acc:HGNC:25108]	ZNF551	1.99212	2.93066	2.46886	3.09552	4.03166	15.5165
ENSG00000181143	1.23082	5.74757	23.6227	1.17194e-06	1.52438e-05	mucin 16, cell surface associated [Source:HGNC Symbol;Acc:HGNC:15582]	MUC16	7.57695	69.7647	35.2192	35.1022	110.907	63.6136
ENSG00000065989	1.23076	3.1248	27.6685	1.43986e-07	2.43491e-06	phosphodiesterase 4A [Source:HGNC Symbol;Acc:HGNC:8780]	PDE4A	4.41029	4.92393	5.76383	16.1001	7.47575	13.4318
ENSG00000273045	1.22888	-1.72835	1.9131	0.166619	0.289753	chromosome 2 open reading frame 15 [Source:HGNC Symbol;Acc:HGNC:28436]	C2orf15	0.0115151	0.495626	0.161425	0.319646	0.135594	0.536957
ENSG00000184545	1.22729	3.92628	44.6892	2.30931e-11	9.11495e-10	dual specificity phosphatase 8 [Source:HGNC Symbol;Acc:HGNC:3074]	DUSP8	6.92059	10.0634	10.5306	21.349	20.1854	21.9521
ENSG00000198886	1.22713	11.4899	21.6547	3.26409e-06	3.68619e-05	mitochondrially encoded NADH:ubiquinone oxidoreductase core subunit 4 [Source:HGNC Symbol;Acc:HGNC:7459]	MT-ND4	1816.18	1687.51	1142.11	7712.8	1967.19	2930.81
ENSG00000196169	1.22517	-1.14581	6.85124	0.00885798	0.0288573	kinesin family member 19 [Source:HGNC Symbol;Acc:HGNC:26735]	KIF19	0.149697	0.226264	0.398815	0.672938	0.705088	0.394821
ENSG00000167657	1.21949	7.02957	40.4706	1.99592e-10	6.55598e-09	death associated protein kinase 3 [Source:HGNC Symbol;Acc:HGNC:2676]	DAPK3	96.7616	79.5802	59.0721	147.903	237.741	162.659
ENSG00000253958	1.21647	-0.077895	14.1351	0.000170141	0.00109323	claudin 23 [Source:HGNC Symbol;Acc:HGNC:17591]	CLDN23	0.368484	0.840409	0.370328	0.546762	2.34126	1.05812
ENSG00000186907	1.2158	-0.48777	14.358	0.000151133	0.000986116	reticulon 4 receptor-like 2 [Source:HGNC Symbol;Acc:HGNC:23053]	RTN4RL2	0.276363	0.398655	0.541249	0.580409	0.940118	1.35029
ENSG00000087258	1.21329	2.86552	33.2191	8.23393e-09	1.88229e-07	G protein subunit alpha o1 [Source:HGNC Symbol;Acc:HGNC:4389]	GNAO1	4.16848	3.43706	5.3935	12.9793	7.22264	10.3048
ENSG00000071051	1.21122	4.45557	54.0417	1.96278e-13	1.09214e-11	NCK adaptor protein 2 [Source:HGNC Symbol;Acc:HGNC:7665]	NCK2	16.3515	16.7758	7.25464	33.2432	38.4906	19.362
ENSG00000225950	1.21097	-3.16384	2.9685	0.0849008	0.174071	neurotrophin 4 [Source:HGNC Symbol;Acc:HGNC:8024]	NTF4	0.103636	0.0646468	0.0094956	0.134588	0.090396	0.142136
ENSG00000080603	1.20898	6.44147	40.3115	2.16527e-10	7.05254e-09	Snf2 related CREBBP activator protein [Source:HGNC Symbol;Acc:HGNC:16974]	SRCAP	39.7502	62.9337	55.7866	141.157	110.807	110.818
ENSG00000198786	1.2083	11.081	19.9496	7.95089e-06	8.08578e-05	mitochondrially encoded NADH:ubiquinone oxidoreductase core subunit 5 [Source:HGNC Symbol;Acc:HGNC:7461]	MT-ND5	1414.89	1131	935.022	5716.26	1235.82	2564.82
ENSG00000167103	1.20801	-1.50401	8.8235	0.00297375	0.0118632	phosphatidylinositol-4-phosphate 5-kinase like 1 [Source:HGNC Symbol;Acc:HGNC:28711]	PIP5KL1	0.161212	0.118519	0.303859	0.319646	0.316386	0.718575
ENSG00000256762	1.20734	-1.8627	7.40636	0.00649935	0.0223481	saitohin [Source:HGNC Symbol;Acc:HGNC:18839]	STH	0.172727	0.129294	0.142434	0.412175	0.22599	0.410614
ENSG00000153976	1.20566	1.28641	23.7656	1.08809e-06	1.42689e-05	heparan sulfate-glucosamine 3-sulfotransferase 3A1 [Source:HGNC Symbol;Acc:HGNC:5196]	HS3ST3A1	2.02666	1.16364	1.22493	4.18904	2.74804	3.0954
ENSG00000182379	1.20123	0.482917	16.9002	3.9397e-05	0.000316143	neurexophilin 4 [Source:HGNC Symbol;Acc:HGNC:8078]	NXPH4	0.322424	1.62694	0.645701	1.06829	3.31753	1.24764
ENSG00000111676	1.20113	5.0011	25.2252	5.10123e-07	7.37125e-06	atrophin 1 [Source:HGNC Symbol;Acc:HGNC:3033]	ATN1	15.3036	24.7382	17.9657	57.3007	32.9855	43.6357
ENSG00000140465	1.20109	-3.2052	3.26029	0.0709768	0.151009	cytochrome P450 family 1 subfamily A member 1 [Source:HGNC Symbol;Acc:HGNC:2595]	CYP1A1	0.0460605	0.0323234	0.0759648	0.134588	0.153673	0.0789643
ENSG00000149639	1.19825	6.45119	58.3348	2.21094e-14	1.44025e-12	suppressor of glucose, autophagy associated 1 [Source:HGNC Symbol;Acc:HGNC:16111]	SOGA1	44.1605	64.0327	52.0454	129.541	125.343	109.666
ENSG00000142611	1.19807	4.51064	58.2236	2.33957e-14	1.50568e-12	PR/SET domain 16 [Source:HGNC Symbol;Acc:HGNC:14000]	PRDM16	13.6224	11.7549	16.0001	31.9898	26.0431	37.1369
ENSG00000120055	1.19545	-1.22254	8.74297	0.00310797	0.0122734	chromosome 10 open reading frame 95 [Source:HGNC Symbol;Acc:HGNC:25880]	C10orf95	0.403029	0.161617	0.189912	0.63088	0.379663	0.647507
ENSG00000146950	1.19505	2.53996	34.7395	3.76909e-09	9.4968e-08	shroom family member 2 [Source:HGNC Symbol;Acc:HGNC:630]	SHROOM2	3.97272	4.21282	2.40239	9.05102	9.39214	5.68543
ENSG00000188779	1.1942	-0.800287	11.3612	0.000749943	0.00378514	SKI family transcriptional corepressor 1 [Source:HGNC Symbol;Acc:HGNC:21326]	SKOR1	0.310908	0.226264	0.47478	0.723409	0.696049	0.837022
ENSG00000163794	1.19415	2.10599	28.1478	1.12396e-07	1.95141e-06	urocortin [Source:HGNC Symbol;Acc:HGNC:12516]	UCN	2.8903	2.34883	2.52583	6.93127	5.95709	4.98265
ENSG00000165655	1.19159	2.8902	36.8189	1.29627e-09	3.5877e-08	zinc finger protein 503 [Source:HGNC Symbol;Acc:HGNC:23589]	ZNF503	3.47757	4.57915	5.3935	7.70514	12.3571	10.7628
ENSG00000225968	1.19156	2.9316	40.0896	2.42574e-10	7.83721e-09	extracellular leucine rich repeat and fibronectin type III domain containing 1 [Source:HGNC Symbol;Acc:HGNC:33154]	ELFN1	4.83635	2.42426	6.49499	10.9857	5.32432	15.4691
ENSG00000214756	1.19124	0.706955	5.64229	0.0175323	0.0503685	methyltransferase like 12 [Source:HGNC Symbol;Acc:HGNC:33113]	METTL12	1.92303	1.16364	0.284868	1.37111	2.72996	2.18731
ENSG00000196453	1.18937	3.20494	44.0284	3.23648e-11	1.24975e-09	zinc finger protein 777 [Source:HGNC Symbol;Acc:HGNC:22213]	ZNF777	6.11453	5.04245	5.67837	12.8784	12.6735	12.7369
ENSG00000167548	1.18758	7.40414	41.7475	1.03853e-10	3.64166e-09	lysine methyltransferase 2D [Source:HGNC Symbol;Acc:HGNC:7133]	KMT2D	81.4465	118.692	110.985	273.432	211.87	219.655
ENSG00000143126	1.1843	4.74736	53.0054	3.32637e-13	1.74771e-11	cadherin EGF LAG seven-pass G-type receptor 2 [Source:HGNC Symbol;Acc:HGNC:3231]	CELSR2	15.3151	17.627	16.1805	40.9399	37.1799	33.7099
ENSG00000103264	1.18142	6.4276	33.967	5.60553e-09	1.35898e-07	F-box protein 31 [Source:HGNC Symbol;Acc:HGNC:16510]	FBXO31	35.052	67.7283	58.0751	129.616	128.326	97.4735
ENSG00000142233	1.18105	-2.01303	2.80396	0.0940316	0.188593	netrin 5 [Source:HGNC Symbol;Acc:HGNC:25208]	NTN5	0.218787	0.161617	0.0284868	0.311234	0.126554	0.489579
ENSG00000169783	1.17927	0.100102	13.9901	0.000183776	0.00116634	leucine rich repeat and Ig domain containing 1 [Source:HGNC Symbol;Acc:HGNC:21205]	LINGO1	0.483635	0.764987	0.664692	1.71599	1.26554	1.35029
ENSG00000145002	1.17614	-0.528099	10.4391	0.00123376	0.00570674	family with sequence similarity 86 member B2 [Source:HGNC Symbol;Acc:HGNC:32222]	FAM86B2	0.172727	0.40943	0.71217	0.614056	1.07571	0.99495
ENSG00000274791	1.17228	1.22208	22.5864	2.00906e-06	2.42886e-05	coagulation factor VIII-associated 2 [Source:HGNC Symbol;Acc:HGNC:31849]	F8A2	1.58909	1.19597	1.46232	3.39834	2.77516	3.37967
ENSG00000178209	1.17217	10.44	72.648	1.54962e-17	1.63909e-15	plectin [Source:HGNC Symbol;Acc:HGNC:9069]	PLEC	962.941	873.303	722.102	1961.37	2216.09	1598.86
ENSG00000213937	1.17151	-0.846477	6.32825	0.0118829	0.0367401	claudin 9 [Source:HGNC Symbol;Acc:HGNC:2051]	CLDN9	0.230303	0.290911	0.408311	0.992584	0.90396	0.347443
ENSG00000225556	1.17073	-0.986856	9.75054	0.0017927	0.00783365	C2 calcium dependent domain containing 4D [Source:HGNC Symbol;Acc:HGNC:37210]	C2CD4D	0.264848	0.398655	0.199408	0.420587	1.08475	0.513268
ENSG00000141905	1.16827	6.76382	28.4731	9.50092e-08	1.6814e-06	nuclear factor I C [Source:HGNC Symbol;Acc:HGNC:7786]	NFIC	51.2538	80.8516	67.8366	193.832	119.738	138.298
ENSG00000198899	1.16695	9.21716	26.9271	2.11278e-07	3.41303e-06	mitochondrially encoded ATP synthase 6 [Source:HGNC Symbol;Acc:HGNC:7414]	MT-ATP6	403.525	384.228	262.078	1324.94	478.041	717.999
ENSG00000203883	1.16466	3.53245	40.3259	2.14937e-10	7.01501e-09	SRY-box 18 [Source:HGNC Symbol;Acc:HGNC:11194]	SOX18	5.45817	8.1024	7.24514	9.43796	19.7063	19.2673
ENSG00000080845	1.16303	4.8675	32.8042	1.01924e-08	2.26537e-07	DLG associated protein 4 [Source:HGNC Symbol;Acc:HGNC:24476]	DLGAP4	12.9891	24.1348	17.9562	43.2026	38.1832	38.4793
ENSG00000106327	1.16281	-2.6339	4.26918	0.0388095	0.0941167	transferrin receptor 2 [Source:HGNC Symbol;Acc:HGNC:11762]	TFR2	0.126666	0.0323234	0.094956	0.176646	0.090396	0.300064
ENSG00000180720	1.16268	-3.63455	2.57374	0.108651	0.210484	cholinergic receptor muscarinic 4 [Source:HGNC Symbol;Acc:HGNC:1953]	CHRM4	0.0345454	0.0430979	0.0284868	0.109352	0.045198	0.0947572
ENSG00000212864	1.16241	1.93975	24.3461	8.04916e-07	1.0996e-05	ring finger protein 208 [Source:HGNC Symbol;Acc:HGNC:25420]	RNF208	2.22242	2.1118	2.63028	5.86298	3.83279	6.14342
ENSG00000183638	1.15645	-1.46639	7.82934	0.00514048	0.0184866	RP1 like 1 [Source:HGNC Symbol;Acc:HGNC:15946]	RP1L1	0.138182	0.323234	0.180416	0.445822	0.506217	0.426407
ENSG00000225614	1.15617	3.37134	41.804	1.00899e-10	3.54583e-09	zinc finger protein 469 [Source:HGNC Symbol;Acc:HGNC:23216]	ZNF469	4.21454	8.88894	6.41902	11.0698	17.356	13.9451
ENSG00000140323	1.15361	0.670196	17.449	2.95114e-05	0.000246441	dispatched RND transporter family member 2 [Source:HGNC Symbol;Acc:HGNC:19712]	DISP2	0.736968	1.15287	1.03502	2.19546	2.09719	2.13993
ENSG00000168334	1.15271	10.6975	74.6725	5.55642e-18	6.1408e-16	xin actin binding repeat containing 1 [Source:HGNC Symbol;Acc:HGNC:14301]	XIRP1	1143.37	1471.51	422.573	2542.66	3507.42	876.101
ENSG00000101276	1.15226	2.43254	29.354	6.02926e-08	1.12873e-06	solute carrier family 52 member 3 [Source:HGNC Symbol;Acc:HGNC:16187]	SLC52A3	4.53696	2.76904	2.82019	8.53791	7.05088	6.49087
ENSG00000169402	1.15072	-2.79745	3.8181	0.0507016	0.115972	radial spoke head 10 homolog B2 [Source:HGNC Symbol;Acc:HGNC:34385]	RSPH10B2	0.0575756	0.0215489	0.142434	0.100941	0.0723168	0.315857
ENSG00000089250	1.14882	-0.194196	8.93135	0.00280317	0.0112952	nitric oxide synthase 1 [Source:HGNC Symbol;Acc:HGNC:7872]	NOS1	0.863634	0.0538724	0.769143	2.12817	0.307346	0.939675
ENSG00000182095	1.14821	6.58056	63.3986	1.68836e-15	1.34607e-13	trinucleotide repeat containing 18 [Source:HGNC Symbol;Acc:HGNC:11962]	TNRC18	49.3653	68.6549	61.1422	116.351	139.454	139.072
ENSG00000144711	1.14383	6.32355	45.7735	1.32746e-11	5.45449e-10	IQ motif and Sec7 domain 1 [Source:HGNC Symbol;Acc:HGNC:29112]	IQSEC1	39.0132	53.9154	57.5433	115.796	94.4547	119.599
ENSG00000100302	1.14133	1.97999	25.008	5.70935e-07	8.08568e-06	RASD family member 2 [Source:HGNC Symbol;Acc:HGNC:18229]	RASD2	2.2109	1.90708	3.27598	4.8788	4.76387	6.4198
ENSG00000183691	1.14113	-2.86757	3.9631	0.046508	0.108406	noggin [Source:HGNC Symbol;Acc:HGNC:7866]	NOG	0.0575756	0.0754213	0.0759648	0.134588	0.117515	0.2211
ENSG00000167182	1.13755	2.81346	22.534	2.06455e-06	2.47824e-05	Sp2 transcription factor [Source:HGNC Symbol;Acc:HGNC:11207]	SP2	3.52363	5.25794	4.29201	12.0288	7.89157	8.97824
ENSG00000188322	1.13682	2.07755	25.3082	4.88638e-07	7.10566e-06	SH3 domain binding kinase 1 [Source:HGNC Symbol;Acc:HGNC:17699]	SBK1	3.00545	3.26466	1.53829	7.61262	6.49043	3.24543
ENSG00000235387	1.13457	2.8027	34.9114	3.45058e-09	8.74929e-08	small regulatory polypeptide of amino acid response [Source:HGNC Symbol;Acc:HGNC:27244]	SPAAR	4.83635	4.49295	3.73177	10.6324	9.23847	8.74135
ENSG00000188766	1.13195	-1.37127	5.35246	0.020693	0.057134	sprouty related EVH1 domain containing 3 [Source:HGNC Symbol;Acc:HGNC:31041]	SPRED3	0.138182	0.258587	0.189912	0.134588	0.470059	0.947572
ENSG00000182795	1.13175	-0.118873	13.8657	0.000196353	0.00123685	chromosome 1 open reading frame 116 [Source:HGNC Symbol;Acc:HGNC:28667]	C1orf116	0.840604	0.344783	0.522258	1.6487	0.958197	1.04233
ENSG00000198894	1.13062	6.41477	6.37669	0.0115629	0.0359727	CLOCK interacting pacemaker [Source:HGNC Symbol;Acc:HGNC:20365]	CIPC	101.068	85.2261	10.7395	117.184	99.5531	98.0105
ENSG00000234857	1.12937	2.0871	9.40977	0.00215832	0.00911627	HNRNPUL2-BSCL2 readthrough (NMD candidate) [Source:HGNC Symbol;Acc:HGNC:49189]	HNRNPUL2-BSCL2	4.89393	0.495626	4.14008	7.17521	3.07346	5.5354
ENSG00000197616	1.12932	10.7427	71.3703	2.96098e-17	2.96561e-15	myosin heavy chain 6 [Source:HGNC Symbol;Acc:HGNC:7576]	MYH6	1273.91	941.559	1014.41	2627.16	2003.64	2419.81
ENSG00000113073	1.12864	-1.65499	6.58055	0.0103099	0.0327308	solute carrier family 4 member 9 [Source:HGNC Symbol;Acc:HGNC:11035]	SLC4A9	0.138182	0.118519	0.303859	0.277587	0.424861	0.481682
ENSG00000188199	1.12768	2.71768	28.8928	7.64957e-08	1.39459e-06	NUT family member 2B [Source:HGNC Symbol;Acc:HGNC:23445]	NUTM2B	4.6406	3.93268	3.50388	11.5661	9.73564	5.90653
ENSG00000178015	1.12499	-2.15287	4.18513	0.0407801	0.0976979	G protein-coupled receptor 150 [Source:HGNC Symbol;Acc:HGNC:23628]	GPR150	0.218787	0.140068	0.047478	0.201882	0.379663	0.236893
ENSG00000214491	1.12231	-0.896408	6.84477	0.00889013	0.0289562	SEC14 like lipid binding 6 [Source:HGNC Symbol;Acc:HGNC:40047]	SEC14L6	0.0345454	0.678792	0.246886	0.19347	1.64521	0.292168
ENSG00000129993	1.12114	2.17822	19.7976	8.60918e-06	8.67141e-05	CBFA2/RUNX1 translocation partner 3 [Source:HGNC Symbol;Acc:HGNC:1537]	CBFA2T3	2.5909	2.59665	3.09556	8.56314	4.43844	5.66174
ENSG00000106536	1.11904	-1.24529	5.39596	0.0201835	0.0560712	POU class 6 homeobox 2 [Source:HGNC Symbol;Acc:HGNC:21694]	POU6F2	0.0460605	0.129294	0.750152	0.235528	0.388703	0.797539
ENSG00000176845	1.11756	5.66374	53.9297	2.07796e-13	1.14431e-11	meteorin like, glial cell differentiation regulator [Source:HGNC Symbol;Acc:HGNC:27584]	METRNL	33.6933	30.0823	32.1331	65.8134	69.4331	72.8051
ENSG00000277971	1.11592	-0.426588	3.02777	0.0818504	0.169267			0.253333	0.377106	0.303859	0.815938	2.45877	0.102654
ENSG00000274386	1.11587	-3.1296	2.73604	0.0981077	0.194987	transmembrane protein 269 [Source:HGNC Symbol;Acc:HGNC:52381]	TMEM269	0.0230303	0.0969702	0.0569736	0.142999	0.0813564	0.150032
ENSG00000099769	1.11544	-0.237027	12.6725	0.000371065	0.0020835	insulin like growth factor binding protein acid labile subunit [Source:HGNC Symbol;Acc:HGNC:5468]	IGFALS	0.598787	0.441753	0.512762	1.11035	1.27458	0.987054
ENSG00000212907	1.11421	9.49218	16.7781	4.20146e-05	0.00033265	mitochondrially encoded NADH:ubiquinone oxidoreductase core subunit 4L [Source:HGNC Symbol;Acc:HGNC:7460]	MT-ND4L	475.471	456.838	309.68	1829.59	472.427	776.756
ENSG00000168135	1.11371	6.00682	52.4058	4.51386e-13	2.30365e-11	potassium voltage-gated channel subfamily J member 4 [Source:HGNC Symbol;Acc:HGNC:6265]	KCNJ4	36.8254	52.407	30.3764	70.0865	131.544	64.4033
ENSG00000271810	1.11279	-3.32116	2.64327	0.103989	0.203645			0.0345454	0.0215489	0.0854604	0.117764	0.0271188	0.173721
ENSG00000198324	1.11187	4.42654	29.1507	6.69598e-08	1.24337e-06	family with sequence similarity 109 member A [Source:HGNC Symbol;Acc:HGNC:26509]	FAM109A	11.7454	11.3455	18.0226	26.3035	35.1188	26.2872
ENSG00000130522	1.10939	6.07099	52.2081	4.99205e-13	2.52829e-11	JunD proto-oncogene, AP-1 transcription factor subunit [Source:HGNC Symbol;Acc:HGNC:6206]	JUND	40.7751	43.1087	43.053	75.9243	105.004	95.302
ENSG00000196498	1.10933	6.84818	42.7652	6.17205e-11	2.27897e-09	nuclear receptor corepressor 2 [Source:HGNC Symbol;Acc:HGNC:7673]	NCOR2	55.215	90.2901	76.2876	156.61	150.455	162.224
ENSG00000176945	1.10439	1.5435	19.557	9.76428e-06	9.63501e-05	mucin 20, cell surface associated [Source:HGNC Symbol;Acc:HGNC:23282]	MUC20	2.86727	1.17442	1.28191	6.89762	1.96159	3.11909
ENSG00000063169	1.10302	2.57334	16.2729	5.48419e-05	0.000418496	glioma tumor suppressor candidate region gene 1 [Source:HGNC Symbol;Acc:HGNC:4332]	GLTSCR1	3.32787	4.68689	3.15254	10.4305	5.51415	8.3939
ENSG00000139438	1.09851	2.63753	30.0459	4.2194e-08	8.2358e-07	family with sequence similarity 222 member A [Source:HGNC Symbol;Acc:HGNC:25915]	FAM222A	3.97272	5.0209	2.79171	7.68832	11.5255	6.16711
ENSG00000266074	1.09751	4.05751	39.2171	3.79199e-10	1.1731e-08	BAH domain and coiled-coil containing 1 [Source:HGNC Symbol;Acc:HGNC:29279]	BAHCC1	7.88786	9.84787	14.4143	21.3069	18.9741	27.2506
ENSG00000268744	1.09709	-0.244767	5.61807	0.0177762	0.0508504			0.783029	0.161617	0.721665	1.48046	1.10283	0.655404
ENSG00000099381	1.09618	4.13124	41.6553	1.08872e-10	3.7682e-09	SET domain containing 1A [Source:HGNC Symbol;Acc:HGNC:29010]	SETD1A	9.92604	11.9273	11.5751	23.822	21.3334	26.3504
ENSG00000182195	1.09522	0.365404	15.926	6.58673e-05	0.000489121	LDOC1, regulator of NFKB signaling [Source:HGNC Symbol;Acc:HGNC:6548]	LDOC1	0.621817	1.04512	0.750152	1.48046	2.16046	1.50032
ENSG00000274944	1.09416	-0.200558	11.4566	0.000712393	0.00362186			0.759998	0.581821	0.32285	1.16082	1.26554	0.979157
ENSG00000249992	1.09301	-1.6149	5.58775	0.0180865	0.0515632	transmembrane protein 158 (gene/pseudogene) [Source:HGNC Symbol;Acc:HGNC:30293]	TMEM158	0.230303	0.183166	0.15193	0.24394	0.479099	0.521164
ENSG00000167173	1.09251	3.44313	27.8216	1.33029e-07	2.27028e-06	chromosome 15 open reading frame 39 [Source:HGNC Symbol;Acc:HGNC:24497]	C15orf39	4.3412	5.24717	11.9265	13.8709	9.60005	20.0332
ENSG00000174473	1.0895	-2.92526	2.81886	0.0931628	0.187178	polypeptide N-acetylgalactosaminyltransferase-like 6 [Source:HGNC Symbol;Acc:HGNC:33844]	GALNTL6	0.0230303	0.0754213	0.113947	0.126176	0.22599	0.0947572
ENSG00000203499	1.08669	-0.644707	9.73856	0.00180443	0.00786614	FAM83H antisense RNA 1 (head to head) [Source:HGNC Symbol;Acc:HGNC:48720]	FAM83H-AS1	0.207272	0.754213	0.275372	0.639292	1.26554	0.55275
ENSG00000204388	1.08617	8.61451	52.6242	4.03878e-13	2.0882e-11	heat shock protein family A (Hsp70) member 1B [Source:HGNC Symbol;Acc:HGNC:5233]	HSPA1B	301.685	230.692	224.732	526.389	563.899	504.092
ENSG00000173065	1.08567	3.38036	29.6189	5.25908e-08	1.00342e-06	family with sequence similarity 222 member B [Source:HGNC Symbol;Acc:HGNC:25563]	FAM222B	5.26241	6.77714	7.9858	15.8056	12.0588	14.3794
ENSG00000177602	1.08366	-1.0894	8.06103	0.00452275	0.0166998	germ cell associated 2, haspin [Source:HGNC Symbol;Acc:HGNC:19682]	GSG2	0.184242	0.527949	0.170921	0.546762	0.922039	0.33165
ENSG00000184574	1.08168	2.16214	23.8479	1.04257e-06	1.37169e-05	lysophosphatidic acid receptor 5 [Source:HGNC Symbol;Acc:HGNC:13307]	LPAR5	2.56787	2.9953	2.99111	6.09009	5.55935	6.45138
ENSG00000171368	1.08063	5.27145	47.0771	6.82471e-12	2.94787e-10	tubulin polymerization promoting protein [Source:HGNC Symbol;Acc:HGNC:24164]	TPPP	23.0187	17.9395	32.7883	54.651	33.781	69.3385
ENSG00000117983	1.07972	0.535905	16.2448	5.56611e-05	0.000423739	mucin 5B, oligomeric mucus/gel-forming [Source:HGNC Symbol;Acc:HGNC:7516]	MUC5B	0.794544	0.958928	0.978047	1.75805	1.826	2.19521
ENSG00000166484	1.07868	2.96312	33.2988	7.90317e-09	1.81966e-07	mitogen-activated protein kinase 7 [Source:HGNC Symbol;Acc:HGNC:6880]	MAPK7	5.72302	5.11787	4.19705	10.8764	11.0012	9.68892
ENSG00000156453	1.07855	5.87975	44.895	2.07889e-11	8.32855e-10	protocadherin 1 [Source:HGNC Symbol;Acc:HGNC:8655]	PCDH1	48.8011	40.4366	26.1889	86.0688	85.1168	66.5037
ENSG00000170561	1.07832	0.357874	13.2583	0.00027137	0.0016111	iroquois homeobox 2 [Source:HGNC Symbol;Acc:HGNC:14359]	IRX2	0.87515	1.16364	0.275372	1.5057	3.20906	0.529061
ENSG00000162951	1.07589	-1.16987	7.86136	0.00505025	0.018244	leucine rich repeat transmembrane neuronal 1 [Source:HGNC Symbol;Acc:HGNC:19408]	LRRTM1	0.345454	0.150843	0.32285	0.546762	0.433901	0.702782
ENSG00000239732	1.0754	0.0448241	12.5629	0.000393478	0.00219627	toll like receptor 9 [Source:HGNC Symbol;Acc:HGNC:15633]	TLR9	0.483635	0.657243	0.759648	1.16082	1.0034	1.92673
ENSG00000125872	1.07518	3.44395	38.8272	4.63033e-10	1.40476e-08	leucine rich repeat neuronal 4 [Source:HGNC Symbol;Acc:HGNC:16208]	LRRN4	2.87878	12.8216	5.06115	6.46862	28.3572	9.54678
ENSG00000135083	1.07241	3.45441	40.6299	1.83972e-10	6.1292e-09	cyclin J like [Source:HGNC Symbol;Acc:HGNC:25876]	CCNJL	8.90119	6.35694	5.92525	18.2535	12.9357	13.2107
ENSG00000160216	1.06956	6.00015	20.7026	5.36431e-06	5.71563e-05	1-acylglycerol-3-phosphate O-acyltransferase 3 [Source:HGNC Symbol;Acc:HGNC:326]	AGPAT3	28.7648	45.0804	49.8044	110.177	63.2681	86.7265
ENSG00000235106	1.06927	2.87472	20.0834	7.41365e-06	7.57677e-05	long intergenic non-protein coding RNA 94 [Source:HGNC Symbol;Acc:HGNC:24742]	LINC00094	4.47938	4.69767	4.28251	7.57056	15.8464	6.95675
ENSG00000157734	1.06863	3.3615	13.4488	0.000245167	0.0014848	sorting nexin 22 [Source:HGNC Symbol;Acc:HGNC:16315]	SNX22	6.37938	12.6492	2.74423	9.6062	17.3922	12.7448
ENSG00000173546	1.06668	7.01283	53.2008	3.01144e-13	1.60326e-11	chondroitin sulfate proteoglycan 4 [Source:HGNC Symbol;Acc:HGNC:2466]	CSPG4	84.6937	104.857	57.4484	165.703	247.839	114.151
ENSG00000178404	1.0629	1.05252	11.5359	0.000682641	0.00349722	CEP295 N-terminal like [Source:HGNC Symbol;Acc:HGNC:44659]	CEP295NL	0.771513	1.88553	1.44333	2.85158	2.38645	2.91378
ENSG00000257341	1.06199	-0.704563	3.68549	0.0548878	0.123553			0.241818	0.323234	0.32285	0.100941	1.11187	1.38977
ENSG00000145113	1.06196	-1.55128	5.76657	0.0163339	0.0475445	mucin 4, cell surface associated [Source:HGNC Symbol;Acc:HGNC:7514]	MUC4	0.264848	0.161617	0.161425	0.563586	0.189831	0.544854
ENSG00000136574	1.06024	5.65803	26.4132	2.7565e-07	4.28032e-06	GATA binding protein 4 [Source:HGNC Symbol;Acc:HGNC:4173]	GATA4	31.9084	29.0049	33.415	42.9419	64.3258	101.145
ENSG00000100276	1.0587	0.514621	12.504	0.000406081	0.0022564	RAS like family 10 member A [Source:HGNC Symbol;Acc:HGNC:16954]	RASL10A	0.667877	0.81886	1.23443	2.17864	1.3469	2.12414
ENSG00000106012	1.05857	3.78123	38.9329	4.38617e-10	1.33375e-08	IQ motif containing E [Source:HGNC Symbol;Acc:HGNC:29171]	IQCE	8.53271	10.4081	7.86235	19.0946	19.0012	17.4037
ENSG00000145506	1.05731	1.66851	20.1841	7.03344e-06	7.22043e-05	naked cuticle homolog 2 [Source:HGNC Symbol;Acc:HGNC:17046]	NKD2	1.07091	2.20877	2.91515	2.47305	4.34805	5.84336
ENSG00000204334	1.05452	-1.13528	4.87866	0.0271907	0.070793	glutamate rich 2 [Source:HGNC Symbol;Acc:HGNC:44395]	ERICH2	0.437575	0.0754213	0.408311	0.597233	0.533336	0.529061
ENSG00000186047	1.05357	-1.34334	6.92639	0.00849332	0.0278847	deleted in lymphocytic leukemia, 7 [Source:HGNC Symbol;Acc:HGNC:17567]	DLEU7	0.092121	0.183166	0.455789	0.260764	0.352544	0.837022
ENSG00000157399	1.05239	-1.88173	5.32078	0.0210726	0.0579025	arylsulfatase E (chondrodysplasia punctata 1) [Source:HGNC Symbol;Acc:HGNC:719]	ARSE	0.310908	0.118519	0.0759648	0.496292	0.343505	0.157929
ENSG00000117713	1.04982	6.43347	40.6064	1.86192e-10	6.19032e-09	AT-rich interaction domain 1A [Source:HGNC Symbol;Acc:HGNC:11110]	ARID1A	45.7957	65.7027	58.2555	127.438	111.992	109.2
ENSG00000196557	1.04919	4.09462	42.6618	6.50714e-11	2.39717e-09	calcium voltage-gated channel subunit alpha1 H [Source:HGNC Symbol;Acc:HGNC:1395]	CACNA1H	14.3133	9.25527	9.80895	29.2055	19.2995	20.436
ENSG00000167978	1.04722	8.31792	18.6958	1.53324e-05	0.000140964	serine/arginine repetitive matrix 2 [Source:HGNC Symbol;Acc:HGNC:16639]	SRRM2	157.02	258.717	203.965	505.335	280.426	508.996
ENSG00000127666	1.04573	2.53295	25.7369	3.91268e-07	5.87635e-06	toll like receptor adaptor molecule 1 [Source:HGNC Symbol;Acc:HGNC:18348]	TICAM1	3.43151	3.95423	3.86471	7.36868	7.14128	8.76504
ENSG00000178821	1.04494	-1.99271	5.22524	0.0222614	0.0604335	transmembrane protein 52 [Source:HGNC Symbol;Acc:HGNC:27916]	TMEM52	0.207272	0.0861958	0.142434	0.445822	0.144634	0.33165
ENSG00000204659	1.04486	-1.13003	5.38282	0.020336	0.0564203	chibby family member 3 [Source:HGNC Symbol;Acc:HGNC:33278]	CBY3	0.368484	0.107745	0.398815	0.38694	0.542376	0.77385
ENSG00000100336	1.0428	2.43364	18.9956	1.31023e-05	0.000123002	apolipoprotein L4 [Source:HGNC Symbol;Acc:HGNC:14867]	APOL4	1.64666	2.1118	6.79885	2.54875	6.35484	12.7054
ENSG00000254706	1.04233	-1.19099	7.89171	0.0049662	0.0180197			0.299393	0.344783	0.170921	0.588821	0.714128	0.371132
ENSG00000183246	1.03906	-1.84116	5.76484	0.01635	0.0475686	RIMS binding protein 3C [Source:HGNC Symbol;Acc:HGNC:33892]	RIMBP3C	0.103636	0.183166	0.208903	0.201882	0.415821	0.410614
ENSG00000127585	1.03712	0.218379	13.7525	0.000208542	0.00129832	F-box and leucine rich repeat protein 16 [Source:HGNC Symbol;Acc:HGNC:14150]	FBXL16	0.598787	0.829634	0.79763	1.26176	1.50961	1.80039
ENSG00000162881	1.03701	0.357239	12.9705	0.000316439	0.00182473	oxoeicosanoid receptor 1 [Source:HGNC Symbol;Acc:HGNC:24884]	OXER1	0.564241	1.099	0.79763	1.11876	1.79888	2.12414
ENSG00000177706	1.03672	4.55348	44.854	2.12285e-11	8.48347e-10	FAM20C, golgi associated secretory pathway kinase [Source:HGNC Symbol;Acc:HGNC:22140]	FAM20C	13.9103	16.2802	15.8956	28.2382	33.8533	32.5175
ENSG00000141437	1.0361	-1.82831	5.40067	0.020129	0.0559625	solute carrier family 25 member 52 [Source:HGNC Symbol;Acc:HGNC:23324]	SLC25A52	0.092121	0.269362	0.161425	0.285999	0.397742	0.339546
ENSG00000171813	1.03583	4.02649	38.4489	5.62073e-10	1.65879e-08	PWWP domain containing 2B [Source:HGNC Symbol;Acc:HGNC:25150]	PWWP2B	12.5515	10.0418	9.53358	22.3584	22.6261	20.4833
ENSG00000205209	1.03568	0.252227	10.8476	0.000989265	0.00476638	secretoglobin family 2B member 2 [Source:HGNC Symbol;Acc:HGNC:27616]	SCGB2B2	0.759998	1.00203	0.550745	1.77488	1.28362	1.60298
ENSG00000168140	1.03541	3.9727	37.8697	7.56318e-10	2.16816e-08	vasorin [Source:HGNC Symbol;Acc:HGNC:18517]	VASN	4.32969	12.0135	13.7496	7.77244	26.938	29.1773
ENSG00000182103	1.0344	0.334568	13.4327	0.000247276	0.0014942	family with sequence similarity 181 member B [Source:HGNC Symbol;Acc:HGNC:28512]	FAM181B	0.702423	1.12054	0.541249	1.25335	2.75708	1.04233
ENSG00000099814	1.03344	5.1626	44.6361	2.37277e-11	9.31951e-10	centrosomal protein 170B [Source:HGNC Symbol;Acc:HGNC:20362]	CEP170B	24.1818	24.5227	21.5645	47.7197	54.7709	41.9616
ENSG00000137507	1.03332	2.82447	25.4501	4.53975e-07	6.68653e-06	leucine rich repeat containing 32 [Source:HGNC Symbol;Acc:HGNC:4161]	LRRC32	4.37575	3.4586	5.99172	11.5914	6.45427	10.4154
ENSG00000070193	1.03323	-1.12947	4.82496	0.0280505	0.0725846	fibroblast growth factor 10 [Source:HGNC Symbol;Acc:HGNC:3666]	FGF10	0.195757	0.0323234	0.79763	0.378528	0.244069	0.908089
ENSG00000196136	1.0322	2.00325	8.21271	0.0041598	0.0156554	serpin family A member 3 [Source:HGNC Symbol;Acc:HGNC:16]	SERPINA3	1.05939	0.958928	5.63089	5.15639	0.940118	10.0285
ENSG00000166535	1.03201	-2.25198	4.49182	0.0340574	0.0849314	alpha-2-macroglobulin like 1 [Source:HGNC Symbol;Acc:HGNC:23336]	A2ML1	0.161212	0.0646468	0.132938	0.319646	0.108475	0.323754
ENSG00000140557	1.03104	3.53527	36.1098	1.86508e-09	5.02317e-08	ST8 alpha-N-acetyl-neuraminide alpha-2,8-sialyltransferase 2 [Source:HGNC Symbol;Acc:HGNC:10870]	ST8SIA2	6.89756	10.7745	4.89973	16.1169	21.9391	8.77293
ENSG00000144681	1.03052	-0.384829	10.5843	0.00114054	0.00534739	SH3 and cysteine rich domain [Source:HGNC Symbol;Acc:HGNC:11353]	STAC	0.368484	0.258587	0.835613	0.832761	0.533336	1.56349
ENSG00000172534	1.02977	6.27223	41.6967	1.0659e-10	3.71329e-09	host cell factor C1 [Source:HGNC Symbol;Acc:HGNC:4839]	HCFC1	46.809	61.1667	45.218	111.481	96.0728	102.804
ENSG00000175591	1.02963	3.55919	38.6176	5.15511e-10	1.53424e-08	purinergic receptor P2Y2 [Source:HGNC Symbol;Acc:HGNC:8541]	P2RY2	8.21028	7.30509	7.67244	16.8571	15.3673	15.1217
ENSG00000134323	1.02957	0.0568199	11.0219	0.000900441	0.00441406	v-myc avian myelocytomatosis viral oncogene neuroblastoma derived homolog [Source:HGNC Symbol;Acc:HGNC:7559]	MYCN	0.207272	0.269362	1.58576	0.428998	0.650851	2.85851
ENSG00000206549	1.02906	-0.157965	7.01174	0.00809772	0.0268167	protease, serine 50 [Source:HGNC Symbol;Acc:HGNC:17910]	PRSS50	1.34727	0.0969702	0.579231	1.66552	0.551415	0.99495
ENSG00000175164	1.02895	2.26052	10.7261	0.00105634	0.00503056	ABO, alpha 1-3-N-acetylgalactosaminyltransferase and alpha 1-3-galactosyltransferase [Source:HGNC Symbol;Acc:HGNC:79]	ABO	2.03818	3.93268	3.28548	6.24992	3.81471	9.20724
ENSG00000177732	1.02765	3.81641	38.5735	5.27313e-10	1.56485e-08	SRY-box 12 [Source:HGNC Symbol;Acc:HGNC:11198]	SOX12	9.89149	8.00543	9.75198	21.1891	15.2498	20.2385
ENSG00000135736	1.02724	2.74732	26.1215	3.20588e-07	4.90212e-06	coiled-coil domain containing 102A [Source:HGNC Symbol;Acc:HGNC:28097]	CCDC102A	4.42181	5.12865	3.54186	7.45279	11.9503	7.62005
ENSG00000178772	1.02709	-0.194935	8.84493	0.00293904	0.0117481	carboxypeptidase N subunit 2 [Source:HGNC Symbol;Acc:HGNC:2313]	CPN2	0.253333	0.474077	0.816621	0.605645	0.578534	2.28996
ENSG00000198691	1.02705	-1.49109	5.61579	0.0177993	0.0508984	ATP binding cassette subfamily A member 4 [Source:HGNC Symbol;Acc:HGNC:34]	ABCA4	0.207272	0.161617	0.23739	0.43741	0.189831	0.726472
ENSG00000130962	1.02514	3.44028	10.5635	0.0011534	0.005395	proline rich and Gla domain 1 [Source:HGNC Symbol;Acc:HGNC:9469]	PRRG1	18.263	4.44986	3.13355	16.201	10.8294	12.1368
ENSG00000178951	1.02433	4.86374	40.766	1.71595e-10	5.76479e-09	zinc finger and BTB domain containing 7A [Source:HGNC Symbol;Acc:HGNC:18078]	ZBTB7A	18.8272	17.6701	20.9473	43.5055	34.8838	38.6609
ENSG00000132846	1.02158	3.24692	24.6337	6.93275e-07	9.64387e-06	zinc finger BED-type containing 3 [Source:HGNC Symbol;Acc:HGNC:20711]	ZBED3	5.41211	7.40206	5.88727	15.343	11.3357	11.3867
ENSG00000113749	1.02014	4.1955	38.8243	4.63724e-10	1.40476e-08	histamine receptor H2 [Source:HGNC Symbol;Acc:HGNC:5183]	HRH2	9.09695	13.4573	13.8446	19.9442	28.312	25.0791
ENSG00000116731	1.01878	5.99331	34.8493	3.56238e-09	9.00428e-08	PR/SET domain 2 [Source:HGNC Symbol;Acc:HGNC:9347]	PRDM2	35.5933	47.7309	42.9866	97.7695	81.9439	76.0031
ENSG00000138162	1.01684	9.47192	52.9365	3.44516e-13	1.79833e-11	transforming acidic coiled-coil containing protein 2 [Source:HGNC Symbol;Acc:HGNC:11523]	TACC2	501.599	422.478	477.866	1149.45	836.615	872.524
ENSG00000156427	1.01633	3.62026	34.878	3.51022e-09	8.88645e-08	fibroblast growth factor 18 [Source:HGNC Symbol;Acc:HGNC:3674]	FGF18	5.97635	2.76904	16.5318	11.3642	6.70738	30.1723
ENSG00000121068	1.01629	4.73467	37.8	7.83801e-10	2.23098e-08	T-box 2 [Source:HGNC Symbol;Acc:HGNC:11597]	TBX2	15.6606	11.4317	24.6886	26.1016	24.4792	57.1465
ENSG00000076067	1.0161	5.75851	8.32328	0.00391401	0.0148877	RNA binding motif single stranded interacting protein 2 [Source:HGNC Symbol;Acc:HGNC:9909]	RBMS2	48.4441	62.7182	11.4042	73.6531	63.5212	64.9323
ENSG00000141582	1.01491	4.25148	36.424	1.58736e-09	4.31874e-08	chromobox 4 [Source:HGNC Symbol;Acc:HGNC:1554]	CBX4	11.9757	12.2721	13.2559	20.2302	27.7335	28.6167
ENSG00000173209	1.01248	5.54162	12.6328	0.000379031	0.00212303	activator of HSP90 ATPase homolog 2 [Source:HGNC Symbol;Acc:HGNC:20437]	AHSA2	20.3587	19.6634	62.8229	65.418	53.6862	57.3123
ENSG00000125378	1.01199	3.23357	26.6212	2.47508e-07	3.9077e-06	bone morphogenetic protein 4 [Source:HGNC Symbol;Acc:HGNC:1071]	BMP4	5.56181	5.11787	8.21369	11.9867	12.7368	12.6185
ENSG00000126895	1.01178	1.99155	20.1661	7.10004e-06	7.27947e-05	arginine vasopressin receptor 2 [Source:HGNC Symbol;Acc:HGNC:897]	AVPR2	2.79818	2.17644	2.8107	5.70315	3.93222	6.23818
ENSG00000078808	1.01141	6.10125	28.6322	8.75161e-08	1.56348e-06	stromal cell derived factor 4 [Source:HGNC Symbol;Acc:HGNC:24188]	SDF4	43.0781	40.3719	47.9813	63.3403	77.3699	139.554
ENSG00000056487	1.01106	-0.501003	8.31374	0.00393464	0.0149543	PHD finger protein 21B [Source:HGNC Symbol;Acc:HGNC:25161]	PHF21B	0.322424	0.430979	0.607718	1.02623	0.858762	0.821229
ENSG00000221869	1.01059	5.8689	44.7463	2.24288e-11	8.89658e-10	CCAAT/enhancer binding protein delta [Source:HGNC Symbol;Acc:HGNC:1835]	CEBPD	41.3048	40.4043	34.1747	78.3805	90.2875	65.9115
ENSG00000198169	1.00928	4.015	14.7525	0.000122584	0.000826772	zinc finger protein 251 [Source:HGNC Symbol;Acc:HGNC:13045]	ZNF251	12.6206	4.27746	18.4499	20.6929	17.0939	23.6656
ENSG00000275793	1.00912	-1.22572	6.92143	0.00851688	0.0279278	RIMS binding protein 3 [Source:HGNC Symbol;Acc:HGNC:29344]	RIMBP3	0.241818	0.269362	0.275372	0.361704	0.587574	0.671197
ENSG00000275342	1.00891	4.39118	38.4098	5.7343e-10	1.68919e-08	PEAK1 related kinase activating pseudokinase 1 [Source:HGNC Symbol;Acc:HGNC:25438]	PRAG1	15.8563	12.7893	13.1894	28.5242	26.3866	28.9641
ENSG00000079432	1.00738	5.81888	45.1714	1.80518e-11	7.28667e-10	capicua transcriptional repressor [Source:HGNC Symbol;Acc:HGNC:14214]	CIC	31.0563	38.3679	43.072	65.7377	71.3314	88.9217
ENSG00000175229	1.00734	1.81471	17.5921	2.73725e-05	0.000231597	galactose-3-O-sulfotransferase 3 [Source:HGNC Symbol;Acc:HGNC:24144]	GAL3ST3	2.70605	2.72594	1.31039	5.29098	6.75258	2.17152
ENSG00000147799	1.00685	1.81777	18.5386	1.66495e-05	0.000151682	Rho GTPase activating protein 39 [Source:HGNC Symbol;Acc:HGNC:29351]	ARHGAP39	1.86545	2.5751	2.54482	4.27316	5.33336	4.37462
ENSG00000163357	1.0049	-3.19791	1.44856	0.228759	0.366732	DC-STAMP domain containing 1 [Source:HGNC Symbol;Acc:HGNC:26539]	DCST1	0.0345454	0.0430979	0.047478	0	0.0994355	0.284271
ENSG00000068650	1.00451	6.88339	39.8816	2.69835e-10	8.59978e-09	ATPase phospholipid transporting 11A [Source:HGNC Symbol;Acc:HGNC:13552]	ATP11A	71.4398	75.5075	87.2456	178.438	124.764	170.76
ENSG00000165238	1.0041	7.25027	41.192	1.37985e-10	4.67486e-09	WNK lysine deficient protein kinase 2 [Source:HGNC Symbol;Acc:HGNC:14542]	WNK2	105.052	61.2529	135.996	264.263	115.77	230.923
ENSG00000260325	1.00359	-1.44609	5.84662	0.015607	0.0458992	heat shock protein family B (small) member 9 [Source:HGNC Symbol;Acc:HGNC:30589]	HSPB9	0.184242	0.204715	0.275372	0.571998	0.280227	0.521164
ENSG00000243444	1.00248	3.33542	13.7851	0.000204953	0.00127946	paralemmin 2 [Source:HGNC Symbol;Acc:HGNC:15845]	PALM2	5.02059	13.091	3.8837	14.7289	13.2159	10.4628
ENSG00000137878	1.00142	7.11483	25.2087	5.14492e-07	7.40767e-06	GRINL1A complex locus 1 [Source:HGNC Symbol;Acc:HGNC:26424]	GCOM1	124.778	70.0987	85.5933	155.659	171.047	224.259
ENSG00000169105	1.00094	3.09026	31.5389	1.9548e-08	4.09486e-07	carbohydrate sulfotransferase 14 [Source:HGNC Symbol;Acc:HGNC:24464]	CHST14	4.82484	6.06603	6.00122	9.13514	13.2972	11.5841
ENSG00000213024	0.999463	4.74711	37.0724	1.13825e-09	3.16675e-08	nucleoporin 62 [Source:HGNC Symbol;Acc:HGNC:8066]	NUP62	17.6527	16.0432	19.9123	30.7785	38.2646	38.2819
ENSG00000165215	0.999108	-2.31752	3.90691	0.0480879	0.111279	claudin 3 [Source:HGNC Symbol;Acc:HGNC:2045]	CLDN3	0.0806059	0.0754213	0.199408	0.252352	0.135594	0.307961
ENSG00000104081	0.998466	2.27376	7.02955	0.00801753	0.0265841	Bcl2 modifying factor [Source:HGNC Symbol;Acc:HGNC:24132]	BMF	4.04181	0.980477	5.8208	4.79469	5.58647	7.59637
ENSG00000137337	0.99772	4.24678	25.0072	5.71169e-07	8.08568e-06	mediator of DNA damage checkpoint 1 [Source:HGNC Symbol;Acc:HGNC:21163]	MDC1	9.32725	13.996	14.5473	24.7137	19.0735	32.0358
ENSG00000158815	0.997343	-2.28486	2.67997	0.101618	0.200101	fibroblast growth factor 17 [Source:HGNC Symbol;Acc:HGNC:3673]	FGF17	0.0690908	0.118519	0.132938	0.454233	0.090396	0.213204
ENSG00000172458	0.996921	0.364408	7.42637	0.0064275	0.0221222	interleukin 17D [Source:HGNC Symbol;Acc:HGNC:5984]	IL17D	1.08242	1.38991	0.303859	1.55617	1.826	1.42925
ENSG00000277150	0.996128	2.17321	21.0921	4.37727e-06	4.77507e-05	coagulation factor VIII-associated 3 [Source:HGNC Symbol;Acc:HGNC:31850]	F8A3	3.39696	2.52123	3.06708	6.30039	5.12545	6.45928
ENSG00000089847	0.995757	1.36232	16.7887	4.17825e-05	0.000331515	ankyrin repeat domain 24 [Source:HGNC Symbol;Acc:HGNC:29424]	ANKRD24	1.58909	1.38991	2.05105	3.30581	2.42261	4.46148
ENSG00000132938	0.995724	6.03022	43.4934	4.25382e-11	1.60772e-09	microtubule associated tumor suppressor candidate 2 [Source:HGNC Symbol;Acc:HGNC:20595]	MTUS2	49.849	38.1308	41.6762	111.018	67.6343	83.6232
ENSG00000188549	0.994649	6.1939	46.8978	7.47849e-12	3.19581e-10	chromosome 15 open reading frame 52 [Source:HGNC Symbol;Acc:HGNC:33488]	C15orf52	47.3732	52.9242	45.5124	99.0734	114.839	79.3354
ENSG00000160298	0.993747	1.34212	16.7493	4.26578e-05	0.000337076	chromosome 21 open reading frame 58 [Source:HGNC Symbol;Acc:HGNC:1300]	C21orf58	1.96909	1.12054	1.97508	3.68434	2.49493	3.77449
ENSG00000187513	0.990648	4.98314	39.0778	4.0725e-10	1.25023e-08	gap junction protein alpha 4 [Source:HGNC Symbol;Acc:HGNC:4278]	GJA4	24.0551	15.0196	24.4986	42.6895	31.277	52.0217
ENSG00000104967	0.988602	3.16088	19.5108	1.00032e-05	9.84649e-05	NOVA alternative splicing regulator 2 [Source:HGNC Symbol;Acc:HGNC:7887]	NOVA2	5.90726	5.86131	5.58341	16.4197	7.49382	12.1921
ENSG00000176371	0.986373	2.53609	10.6374	0.00110826	0.00523119	zinc finger and SCAN domain containing 2 [Source:HGNC Symbol;Acc:HGNC:20994]	ZSCAN2	1.85394	5.39801	5.03267	7.75562	6.74354	7.81747
ENSG00000162104	0.985587	6.80901	46.6654	8.42045e-12	3.56978e-10	adenylate cyclase 9 [Source:HGNC Symbol;Acc:HGNC:240]	ADCY9	75.8156	67.7606	82.2983	159.015	137.113	150.569
ENSG00000140067	0.984687	-1.11168	7.07956	0.00779682	0.0259867	family with sequence similarity 181 member A [Source:HGNC Symbol;Acc:HGNC:20491]	FAM181A	0.44909	0.290911	0.142434	0.942114	0.515257	0.300064
ENSG00000277400	0.984601	1.69147	16.2038	5.68806e-05	0.000432201	MaFF-interacting protein [Source:UniProtKB/Swiss-Prot;Acc:Q8WZ33]		3.29333	0.484851	2.92464	5.92186	1.21131	5.33799
ENSG00000179431	0.983987	1.26323	15.6781	7.50886e-05	0.000546704	four jointed box 1 [Source:HGNC Symbol;Acc:HGNC:17166]	FJX1	0.759998	1.81011	2.14601	1.42999	3.44409	4.60362
ENSG00000123411	0.983516	1.55562	5.21147	0.0224383	0.0608043	IKAROS family zinc finger 4 [Source:HGNC Symbol;Acc:HGNC:13179]	IKZF4	0.598787	3.41551	2.57331	4.00398	3.50736	3.35598
ENSG00000108551	0.982785	5.46623	38.744	4.83193e-10	1.45548e-08	ras related dexamethasone induced 1 [Source:HGNC Symbol;Acc:HGNC:15828]	RASD1	42.4678	37.9908	7.7579	74.1242	87.9824	14.7979
ENSG00000167395	0.979338	4.90221	39.0201	4.19459e-10	1.28279e-08	zinc finger protein 646 [Source:HGNC Symbol;Acc:HGNC:29004]	ZNF646	18.4127	21.7429	20.0167	33.7563	43.146	42.1511
ENSG00000115568	0.978959	5.03807	36.3009	1.69084e-09	4.56926e-08	zinc finger protein 142 [Source:HGNC Symbol;Acc:HGNC:12927]	ZNF142	19.6333	23.6823	23.0743	45.5579	41.4646	43.5251
ENSG00000179981	0.978745	5.18184	41.5924	1.1243e-10	3.86523e-09	teashirt zinc finger homeobox 1 [Source:HGNC Symbol;Acc:HGNC:10669]	TSHZ1	24.5272	21.2688	27.4803	47.888	42.4771	53.9484
ENSG00000127578	0.977164	0.0969374	11.6118	0.00065534	0.00338005	WAP, follistatin/kazal, immunoglobulin, kunitz and netrin domain containing 1 [Source:HGNC Symbol;Acc:HGNC:30912]	WFIKKN1	0.736968	0.614145	0.731161	1.7244	1.07571	1.35819
ENSG00000185112	0.977035	3.74615	35.1897	2.99097e-09	7.72299e-08	family with sequence similarity 43 member A [Source:HGNC Symbol;Acc:HGNC:26888]	FAM43A	4.74423	6.98186	15.003	8.84073	13.8667	30.8277
ENSG00000177606	0.97626	7.43073	44.7402	2.24987e-11	8.90224e-10	Jun proto-oncogene, AP-1 transcription factor subunit [Source:HGNC Symbol;Acc:HGNC:6204]	JUN	140.888	112.098	96.8551	245.665	249.384	190.138
ENSG00000176381	0.976195	-3.10555	2.26247	0.132542	0.24453	proline rich 18 [Source:HGNC Symbol;Acc:HGNC:28574]	PRR18	0.0345454	0.0969702	0.0569736	0.185058	0.108475	0.0868607
ENSG00000137166	0.974943	3.2684	18.4072	1.78385e-05	0.000160237	forkhead box P4 [Source:HGNC Symbol;Acc:HGNC:20842]	FOXP4	5.19332	7.70375	6.45701	16.0159	10.3955	11.8525
ENSG00000119242	0.973134	4.82986	39.6867	2.98144e-10	9.36814e-09	coiled-coil domain containing 92 [Source:HGNC Symbol;Acc:HGNC:29563]	CCDC92	26.0012	19.6526	12.3158	48.9058	37.8849	25.7187
ENSG00000272333	0.972527	5.11617	32.7267	1.06073e-08	2.35106e-07	lysine methyltransferase 2B [Source:HGNC Symbol;Acc:HGNC:15840]	KMT2B	20.0478	24.6735	25.4672	48.6703	39.5121	49.5264
ENSG00000154358	0.970639	11.6899	57.6301	3.16355e-14	1.98808e-12	obscurin, cytoskeletal calmodulin and titin-interacting RhoGEF [Source:HGNC Symbol;Acc:HGNC:15719]	OBSCN	2468.91	2292.47	1932.71	4666.58	4737.72	3723.8
ENSG00000008056	0.970573	0.814336	13.7303	0.000211024	0.00131027	synapsin I [Source:HGNC Symbol;Acc:HGNC:11494]	SYN1	0.94424	1.37913	1.19645	2.33005	2.44069	2.08466
ENSG00000196361	0.970064	-1.79081	4.0589	0.043939	0.103593	ELAV like RNA binding protein 3 [Source:HGNC Symbol;Acc:HGNC:3314]	ELAVL3	0.403029	0.0323234	0.15193	0.622468	0.180792	0.213204
ENSG00000075461	0.969974	-1.31673	6.00607	0.0142568	0.0426877	calcium voltage-gated channel auxiliary subunit gamma 4 [Source:HGNC Symbol;Acc:HGNC:1408]	CACNG4	0.092121	0.452528	0.246886	0.227117	0.723168	0.521164
ENSG00000179772	0.969342	1.55933	15.7214	7.33891e-05	0.000537259	forkhead box S1 [Source:HGNC Symbol;Acc:HGNC:3735]	FOXS1	0.656362	2.68284	2.70625	1.5057	4.51076	5.41695
ENSG00000171574	0.968039	3.03097	13.8305	0.000200067	0.00125581	zinc finger protein 584 [Source:HGNC Symbol;Acc:HGNC:27318]	ZNF584	5.44665	5.11787	4.97569	7.52009	7.70174	18.0591
ENSG00000277363	0.967538	1.45948	13.256	0.000271714	0.00161145	SRC kinase signaling inhibitor 1 [Source:HGNC Symbol;Acc:HGNC:29506]	SRCIN1	1.50848	2.91988	1.27241	4.00398	3.94126	2.69268
ENSG00000126003	0.967393	3.66944	25.3543	4.77084e-07	6.95657e-06	PLAG1 like zinc finger 2 [Source:HGNC Symbol;Acc:HGNC:9047]	PLAGL2	7.36968	10.9469	7.51102	20.0452	16.7052	13.5819
ENSG00000272573	0.96731	2.19505	1.91116	0.166834	0.290001	musculoskeletal, embryonic nuclear protein 1 [Source:HGNC Symbol;Acc:HGNC:22144]	MUSTN1	9.5921	0.366332	1.0825	8.27714	7.24072	0.844918
ENSG00000164638	0.967081	0.837518	7.46678	0.00628477	0.0217618	solute carrier family 29 member 4 [Source:HGNC Symbol;Acc:HGNC:23097]	SLC29A4	0.333939	1.02357	2.8012	1.48888	1.80792	3.05592
ENSG00000167676	0.966837	9.36279	48.7144	2.96087e-12	1.33656e-10	perilipin 4 [Source:HGNC Symbol;Acc:HGNC:29393]	PLIN4	516.822	284.252	548.836	910.259	615.786	1074.16
ENSG00000080854	0.966641	5.39337	32.3101	1.31429e-08	2.86161e-07	immunoglobulin superfamily member 9B [Source:HGNC Symbol;Acc:HGNC:32326]	IGSF9B	27.3254	29.716	27.4898	68.5808	52.9901	45.894
ENSG00000089225	0.964658	4.85291	35.1361	3.07452e-09	7.89569e-08	T-box 5 [Source:HGNC Symbol;Acc:HGNC:11604]	TBX5	20.2436	16.1617	21.8209	47.215	29.0533	38.6925
ENSG00000260300	0.96345	2.08982	18.6276	1.58907e-05	0.000145596			2.5909	2.9522	3.05758	5.78727	5.3424	5.62226
ENSG00000166840	0.962873	-3.07079	2.30197	0.12921	0.239958	glycine-N-acyltransferase like 1 [Source:HGNC Symbol;Acc:HGNC:30519]	GLYATL1	0.0345454	0.0969702	0.0664692	0.151411	0.090396	0.142136
ENSG00000122547	0.96193	4.42411	33.5647	6.89316e-09	1.61496e-07	endonuclease/exonuclease/phosphatase family domain containing 1 [Source:HGNC Symbol;Acc:HGNC:22223]	EEPD1	19.8751	9.78322	14.7087	32.7973	21.7402	29.7143
ENSG00000181666	0.961809	5.14913	8.7909	0.00302737	0.0120172	HKR1, GLI-Kruppel zinc finger family member [Source:HGNC Symbol;Acc:HGNC:4928]	HKR1	14.843	17.8425	43.9171	61.9692	37.5234	36.6
ENSG00000183114	0.960052	2.14028	17.6363	2.67436e-05	0.000227477	family with sequence similarity 43 member B [Source:HGNC Symbol;Acc:HGNC:31791]	FAM43B	1.69272	6.55088	0.902082	2.94411	12.1492	2.09255
ENSG00000181638	0.959797	3.19372	26.7445	2.32213e-07	3.7027e-06	ZFP41 zinc finger protein [Source:HGNC Symbol;Acc:HGNC:26786]	ZFP41	4.89393	7.11115	6.6944	11.3054	11.7244	12.9738
ENSG00000179588	0.959782	3.00668	27.6165	1.47909e-07	2.47992e-06	zinc finger protein, FOG family member 1 [Source:HGNC Symbol;Acc:HGNC:19762]	ZFPM1	5.38908	5.60272	5.30804	9.79967	10.8656	11.0708
ENSG00000085872	0.95973	4.19622	34.5541	4.14576e-09	1.03691e-07	calcium homeostasis endoplasmic reticulum protein [Source:HGNC Symbol;Acc:HGNC:16930]	CHERP	12.2982	11.6257	13.2179	25.9586	20.2577	26.4293
ENSG00000105357	0.958879	7.75041	41.2414	1.34544e-10	4.57764e-09	myosin heavy chain 14 [Source:HGNC Symbol;Acc:HGNC:23212]	MYH14	180.661	119.047	143.032	301.35	274.768	272.94
ENSG00000175894	0.957183	-0.123608	8.35328	0.00384992	0.0146893	thrombospondin type laminin G domain and EAR repeats [Source:HGNC Symbol;Acc:HGNC:1268]	TSPEAR	0.403029	0.172392	1.23443	1.11876	0.253109	2.10045
ENSG00000158186	0.956836	6.87951	17.6139	2.70602e-05	0.000229228	muscle RAS oncogene homolog [Source:HGNC Symbol;Acc:HGNC:7227]	MRAS	146.058	57.3633	45.4554	215.281	81.736	160.4
ENSG00000196422	0.956642	5.74031	39.3517	3.5394e-10	1.10563e-08	protein phosphatase 1 regulatory subunit 26 [Source:HGNC Symbol;Acc:HGNC:29089]	PPP1R26	41.5005	35.9544	31.8862	72.6942	72.8139	65.7141
ENSG00000145217	0.956088	2.57161	22.6146	1.97977e-06	2.39802e-05	solute carrier family 26 member 1 [Source:HGNC Symbol;Acc:HGNC:10993]	SLC26A1	3.03999	4.62225	4.42495	6.0985	8.19891	9.08879
ENSG00000186472	0.955692	4.36375	33.6292	6.66829e-09	1.57618e-07	piccolo presynaptic cytomatrix protein [Source:HGNC Symbol;Acc:HGNC:13406]	PCLO	12.3097	8.44718	21.2037	27.8681	15.0057	38.4635
ENSG00000111432	0.954973	-2.11597	3.73219	0.0533735	0.121028	frizzled class receptor 10 [Source:HGNC Symbol;Acc:HGNC:4039]	FZD10	0.0690908	0.0538724	0.294364	0.142999	0.108475	0.544854
ENSG00000275674	0.954829	-2.75917	2.98458	0.0840612	0.172614			0.115151	0.0969702	0.047478	0.159823	0.244069	0.102654
ENSG00000005339	0.954027	6.62298	40.4835	1.98285e-10	6.53809e-09	CREB binding protein [Source:HGNC Symbol;Acc:HGNC:2348]	CREBBP	64.5768	62.0178	74.1416	148.745	111.648	130.054
ENSG00000107954	0.952658	0.218018	11.7375	0.000612542	0.00318843	neuralized E3 ubiquitin protein ligase 1 [Source:HGNC Symbol;Acc:HGNC:7761]	NEURL1	0.725453	0.668017	0.921073	1.27017	1.4373	1.7767
ENSG00000187140	0.952634	-1.22658	5.01881	0.0250733	0.0664572	forkhead box D3 [Source:HGNC Symbol;Acc:HGNC:3804]	FOXD3	0.092121	0.0646468	0.636205	0.151411	0.144634	1.26343
ENSG00000165714	0.952138	3.42127	31.4368	2.06038e-08	4.288e-07	BLOC-1 related complex subunit 5 [Source:HGNC Symbol;Acc:HGNC:17950]	BORCS5	6.66726	8.1455	7.03624	13.9719	15.3944	12.8791
ENSG00000183072	0.952105	6.21957	36.6281	1.42956e-09	3.91603e-08	NK2 homeobox 5 [Source:HGNC Symbol;Acc:HGNC:2488]	NKX2-5	49.9411	41.4063	60.6294	77.6823	97.9169	119.347
ENSG00000185551	0.951093	4.06277	32.7154	1.06689e-08	2.3582e-07	nuclear receptor subfamily 2 group F member 2 [Source:HGNC Symbol;Acc:HGNC:7976]	NR2F2	9.67271	8.61958	15.5918	21.1303	14.5899	30.4407
ENSG00000180929	0.950157	-0.401473	8.14203	0.00432507	0.0161485	G protein-coupled receptor 62 [Source:HGNC Symbol;Acc:HGNC:13301]	GPR62	0.356969	0.646468	0.493771	0.799114	0.849722	1.22395
ENSG00000069188	0.950139	3.2244	25.1826	5.21497e-07	7.48164e-06	sidekick cell adhesion molecule 2 [Source:HGNC Symbol;Acc:HGNC:19308]	SDK2	4.3412	11.4748	4.06412	10.0268	17.7357	8.28335
ENSG00000130762	0.950113	-0.013926	9.38543	0.00218716	0.00920396	Rho guanine nucleotide exchange factor 16 [Source:HGNC Symbol;Acc:HGNC:15515]	ARHGEF16	0.310908	0.980477	0.740657	0.807526	1.35594	1.57139
ENSG00000117601	0.949661	-2.57594	2.7363	0.0980917	0.194979	serpin family C member 1 [Source:HGNC Symbol;Acc:HGNC:775]	SERPINC1	0.115151	0.183166	0.0284868	0.227117	0.180792	0.150032
ENSG00000132702	0.948762	1.19553	13.4187	0.000249122	0.00150364	hyaluronan and proteoglycan link protein 2 [Source:HGNC Symbol;Acc:HGNC:17410]	HAPLN2	2.63696	1.30371	0.873595	3.96192	2.92883	1.89514
ENSG00000175745	0.946981	2.17446	18.4595	1.73552e-05	0.000156951	nuclear receptor subfamily 2 group F member 1 [Source:HGNC Symbol;Acc:HGNC:7975]	NR2F1	2.04969	6.00138	1.37686	3.8694	10.6938	2.96116
ENSG00000260097	0.946968	0.797525	11.0184	0.000902139	0.00441833	speedy/RINGO cell cycle regulator family member E6 [Source:HGNC Symbol;Acc:HGNC:35465]	SPDYE6	1.31272	1.40068	0.721665	3.52451	1.85312	1.45294
ENSG00000167880	0.946728	-0.0416419	9.72713	0.00181568	0.00790015	envoplakin [Source:HGNC Symbol;Acc:HGNC:3503]	EVPL	0.276363	1.02357	0.702674	0.731821	1.70848	1.22395
ENSG00000130749	0.944884	5.57444	39.7534	2.88138e-10	9.12533e-09	zinc finger CCCH-type containing 4 [Source:HGNC Symbol;Acc:HGNC:17808]	ZC3H4	33.0369	31.4184	33.2251	64.274	62.9698	60.7946
ENSG00000108175	0.943026	6.58452	23.6295	1.16783e-06	1.52026e-05	zinc finger MIZ-type containing 1 [Source:HGNC Symbol;Acc:HGNC:16493]	ZMIZ1	51.7029	70.9391	73.8758	153.186	101.524	124.392
ENSG00000166592	0.941272	6.55037	37.0834	1.13184e-09	3.15439e-08	RRAD, Ras related glycolysis inhibitor and calcium channel regulator [Source:HGNC Symbol;Acc:HGNC:10446]	RRAD	45.1393	38.0447	107.348	71.0791	85.2795	215.217
ENSG00000132821	0.940204	1.04644	14.0767	0.000175509	0.00112321	V-set and transmembrane domain containing 2 like [Source:HGNC Symbol;Acc:HGNC:16096]	VSTM2L	1.81939	0.754213	1.59526	3.73481	1.46441	2.83482
ENSG00000175520	0.940004	-2.24872	3.60581	0.0575781	0.128214	ubiquilin 3 [Source:HGNC Symbol;Acc:HGNC:12510]	UBQLN3	0.0806059	0.0646468	0.227894	0.126176	0.144634	0.457993
ENSG00000169184	0.93926	4.35269	28.8654	7.75881e-08	1.4065e-06	MN1 proto-oncogene, transcriptional regulator [Source:HGNC Symbol;Acc:HGNC:7180]	MN1	5.64241	20.8163	17.3295	13.8457	33.0759	31.6805
ENSG00000148795	0.938948	-1.34444	5.78049	0.016205	0.0472671	cytochrome P450 family 17 subfamily A member 1 [Source:HGNC Symbol;Acc:HGNC:2593]	CYP17A1	0.230303	0.31246	0.218399	0.471057	0.44294	0.536957
ENSG00000185028	0.938311	4.63725	32.2782	1.33604e-08	2.90504e-07	leucine rich repeat containing 14B [Source:HGNC Symbol;Acc:HGNC:37268]	LRRC14B	18.1363	5.16097	28.145	29.3149	11.1097	57.2017
ENSG00000132854	0.938154	-0.770417	6.44212	0.0111446	0.034929	KN motif and ankyrin repeat domains 4 [Source:HGNC Symbol;Acc:HGNC:27263]	KANK4	0.103636	0.366332	0.759648	0.344881	0.66893	1.08971
ENSG00000125434	0.937682	0.517343	10.9777	0.000922161	0.00448895	solute carrier family 25 member 35 [Source:HGNC Symbol;Acc:HGNC:31921]	SLC25A35	0.967271	0.883507	0.978047	2.18705	1.22938	2.15573
ENSG00000170214	0.936659	1.088	11.1042	0.000861308	0.00425214	adrenoceptor alpha 1B [Source:HGNC Symbol;Acc:HGNC:278]	ADRA1B	1.79636	1.84243	0.816621	2.45623	3.32657	2.36893
ENSG00000197497	0.936487	1.65128	13.4457	0.000245566	0.00148509	zinc finger protein 665 [Source:HGNC Symbol;Acc:HGNC:25885]	ZNF665	0.783029	2.47813	3.50388	2.11134	4.48364	5.28271
ENSG00000258986	0.936267	1.05589	13.7302	0.000211036	0.00131027	transmembrane protein 179 [Source:HGNC Symbol;Acc:HGNC:20137]	TMEM179	1.32424	1.68082	1.22493	2.97775	2.77516	2.32155
ENSG00000188827	0.934224	3.36508	28.3234	1.02648e-07	1.80762e-06	SLX4 structure-specific endonuclease subunit [Source:HGNC Symbol;Acc:HGNC:23845]	SLX4	5.60787	7.0896	8.45108	11.7932	11.7515	16.922
ENSG00000181588	0.933214	3.17996	21.7021	3.18435e-06	3.60886e-05	mex-3 RNA binding family member D [Source:HGNC Symbol;Acc:HGNC:16734]	MEX3D	5.78059	6.20609	6.2576	9.02579	16.3255	10.6049
ENSG00000137843	0.933106	2.41284	12.3637	0.000437766	0.0024	p21 (RAC1) activated kinase 6 [Source:HGNC Symbol;Acc:HGNC:16061]	PAK6	3.1206	4.14817	3.38043	10.0604	5.3424	5.70912
ENSG00000197106	0.932937	-2.79394	2.50697	0.113344	0.217525	solute carrier family 6 member 17 [Source:HGNC Symbol;Acc:HGNC:31399]	SLC6A17	0.0806059	0.0538724	0.094956	0.142999	0.0542376	0.292168
ENSG00000133401	0.932471	7.72636	38.6156	5.16042e-10	1.53424e-08	PDZ domain containing 2 [Source:HGNC Symbol;Acc:HGNC:18486]	PDZD2	135.855	165.507	134.467	315.406	286.374	232.834
ENSG00000125878	0.931297	3.75992	26.7942	2.26316e-07	3.62309e-06	transcription factor 15 (basic helix-loop-helix) [Source:HGNC Symbol;Acc:HGNC:11627]	TCF15	12.8509	6.01215	9.61904	19.3975	13.5865	19.6305
ENSG00000123989	0.930831	6.57173	42.4063	7.41495e-11	2.70056e-09	chondroitin polymerizing factor [Source:HGNC Symbol;Acc:HGNC:24291]	CHPF	57.8865	66.6509	71.141	102.606	135.259	137.003
ENSG00000165376	0.929985	-0.786872	7.11867	0.00762852	0.025532	claudin 2 [Source:HGNC Symbol;Acc:HGNC:2041]	CLDN2	0.218787	0.377106	0.569736	0.538351	0.759326	0.844918
ENSG00000116396	0.929852	4.4602	28.4859	9.43845e-08	1.67591e-06	potassium voltage-gated channel subfamily C member 4 [Source:HGNC Symbol;Acc:HGNC:6236]	KCNC4	11.1812	19.4156	15.4778	27.1362	30.6081	28.0639
ENSG00000177051	0.929474	3.15542	27.4386	1.62161e-07	2.68732e-06	F-box protein 46 [Source:HGNC Symbol;Acc:HGNC:25069]	FBXO46	6.49453	5.19329	6.70389	11.6082	10.8566	12.4132
ENSG00000178252	0.929241	6.28857	30.7513	2.933e-08	5.93451e-07	WD repeat domain 6 [Source:HGNC Symbol;Acc:HGNC:12758]	WDR6	49.5496	61.6838	49.4246	89.6438	92.1316	126.398
ENSG00000159871	0.929235	-0.806289	6.86112	0.00880915	0.0287274	LY6/PLAUR domain containing 5 [Source:HGNC Symbol;Acc:HGNC:26397]	LYPD5	0.241818	0.269362	0.598223	0.614056	0.388703	1.12919
ENSG00000109956	0.928802	0.0637633	6.73683	0.00944423	0.0304209	beta-1,3-glucuronyltransferase 1 [Source:HGNC Symbol;Acc:HGNC:921]	B3GAT1	0.241818	2.12257	0.170921	0.445822	2.55821	0.631714
ENSG00000041988	0.928624	3.46145	18.7396	1.49839e-05	0.000138396	THAP domain containing 3 [Source:HGNC Symbol;Acc:HGNC:20855]	THAP3	7.0012	7.0896	7.99529	20.8274	11.408	11.5762
ENSG00000149679	0.92844	3.24519	26.6959	2.38126e-07	3.77445e-06	Cdk5 and Abl enzyme substrate 2 [Source:HGNC Symbol;Acc:HGNC:16143]	CABLES2	6.56362	6.72327	6.18163	14.2915	11.6249	11.3235
ENSG00000176692	0.92819	0.748863	12.2347	0.000469101	0.00254718	forkhead box C2 [Source:HGNC Symbol;Acc:HGNC:3801]	FOXC2	0.840604	1.49765	1.12048	1.92629	2.3051	2.2189
ENSG00000061337	0.928079	3.07344	27.0075	2.02665e-07	3.29716e-06	leucine zipper tumor suppressor 1 [Source:HGNC Symbol;Acc:HGNC:13861]	LZTS1	5.35453	5.78589	6.20063	10.4221	11.5888	10.9681
ENSG00000130700	0.928048	1.74394	15.1808	9.76942e-05	0.000684842	GATA binding protein 5 [Source:HGNC Symbol;Acc:HGNC:15802]	GATA5	3.89211	2.16567	0.731161	7.33503	4.60115	1.23974
ENSG00000100078	0.927459	-2.60922	2.98436	0.0840726	0.172615	phospholipase A2 group III [Source:HGNC Symbol;Acc:HGNC:17934]	PLA2G3	0.0460605	0.150843	0.104452	0.159823	0.207911	0.181618
ENSG00000144671	0.927199	-1.97693	3.27695	0.0702595	0.149782	solute carrier family 22 member 14 [Source:HGNC Symbol;Acc:HGNC:8495]	SLC22A14	0.149697	0.237038	0.094956	0.403763	0.198871	0.300064
ENSG00000219438	0.927187	-0.0286617	7.48158	0.00623333	0.0216257	family with sequence similarity 19 member A5, C-C motif chemokine like [Source:HGNC Symbol;Acc:HGNC:21592]	FAM19A5	0.161212	1.61617	0.47478	0.521527	1.97967	0.99495
ENSG00000155034	0.92713	2.67837	20.6147	5.61624e-06	5.95634e-05	F-box and leucine rich repeat protein 18 [Source:HGNC Symbol;Acc:HGNC:21874]	FBXL18	3.97272	4.70844	4.48192	9.26132	7.90061	7.89643
ENSG00000136630	0.925937	3.17147	27.7109	1.40869e-07	2.38881e-06	H2.0 like homeobox [Source:HGNC Symbol;Acc:HGNC:4978]	HLX	4.68666	4.50373	9.41014	8.68091	8.89496	17.6564
ENSG00000188112	0.925931	2.25227	17.5647	2.77695e-05	0.00023446	chromosome 6 open reading frame 132 [Source:HGNC Symbol;Acc:HGNC:21288]	C6orf132	2.31454	3.71719	3.85521	5.12274	7.02377	6.36452
ENSG00000008735	0.925581	-0.244289	8.36838	0.00381806	0.014599	mitogen-activated protein kinase 8 interacting protein 2 [Source:HGNC Symbol;Acc:HGNC:6883]	MAPK8IP2	0.460605	0.861958	0.408311	1.16923	1.20227	0.813332
ENSG00000173080	0.923534	0.192119	8.46977	0.00361096	0.0139236	relaxin/insulin like family peptide receptor 4 [Source:HGNC Symbol;Acc:HGNC:14666]	RXFP4	1.02485	0.31246	1.05401	1.27017	0.940118	2.06886
ENSG00000123454	0.922507	-2.03493	3.45951	0.0628891	0.137565	dopamine beta-hydroxylase [Source:HGNC Symbol;Acc:HGNC:2689]	DBH	0.126666	0.323234	0.0569736	0.235528	0.379663	0.2211
ENSG00000128011	0.92219	-0.10393	9.82869	0.0017181	0.00755561	leucine rich repeat and fibronectin type III domain containing 1 [Source:HGNC Symbol;Acc:HGNC:29290]	LRFN1	0.414545	0.635694	0.826117	0.849585	1.18419	1.49243
ENSG00000101654	0.921161	5.39036	35.181	3.00441e-09	7.74046e-08	RNA guanine-7 methyltransferase [Source:HGNC Symbol;Acc:HGNC:10075]	RNMT	29.5248	27.3995	29.8921	59.6308	54.346	50.6793
ENSG00000178093	0.921085	-0.145918	9.15052	0.00248647	0.0102195	testis specific serine kinase 6 [Source:HGNC Symbol;Acc:HGNC:30410]	TSSK6	0.529696	0.560272	0.693179	0.984172	0.876841	1.59508
ENSG00000136383	0.919116	9.37274	43.8665	3.51555e-11	1.34777e-09	alpha kinase 3 [Source:HGNC Symbol;Acc:HGNC:17574]	ALPK3	382.774	557.708	438.203	813.322	1031.29	754.172
ENSG00000090924	0.919057	4.51698	30.2569	3.78445e-08	7.44119e-07	pleckstrin homology and RhoGEF domain containing G2 [Source:HGNC Symbol;Acc:HGNC:29515]	PLEKHG2	12.3442	19.0277	16.5128	27.7167	30.1832	31.3962
ENSG00000177875	0.917068	-0.243584	9.26243	0.00233902	0.00972064	coiled-coil domain containing 184 [Source:HGNC Symbol;Acc:HGNC:33749]	CCDC184	0.748483	0.484851	0.47478	1.32064	0.89492	0.987054
ENSG00000249459	0.917008	1.69769	6.38954	0.0114795	0.0357317	zinc finger protein 286B [Source:HGNC Symbol;Acc:HGNC:33241]	ZNF286B	0.829089	3.57712	2.8107	3.97875	5.07121	3.02433
ENSG00000160993	0.915975	2.8713	21.4967	3.54435e-06	3.97747e-05	alkB homolog 4, lysine demethylase [Source:HGNC Symbol;Acc:HGNC:21900]	ALKBH4	5.00908	4.14817	6.07718	8.81549	9.56389	10.0995
ENSG00000277957	0.915621	2.65109	0.972903	0.323957	0.471732	SENP3-EIF4A1 readthrough (NMD candidate) [Source:HGNC Symbol;Acc:HGNC:49182]	SENP3-EIF4A1	4.01878	7.36974	1.12048	17.8076	0.65989	6.52245
ENSG00000104885	0.915595	4.50378	31.7124	1.78774e-08	3.80453e-07	DOT1 like histone lysine methyltransferase [Source:HGNC Symbol;Acc:HGNC:24948]	DOT1L	13.6569	15.0735	18.5924	29.4579	28.4747	30.6697
ENSG00000065526	0.914964	7.0082	33.2667	8.03465e-09	1.84463e-07	spen family transcriptional repressor [Source:HGNC Symbol;Acc:HGNC:17575]	SPEN	73.6738	107.896	87.8533	175.393	172.439	154.936
ENSG00000119227	0.914891	2.38249	19.1573	1.20376e-05	0.000114414	phosphatidylinositol glycan anchor biosynthesis class Z [Source:HGNC Symbol;Acc:HGNC:30596]	PIGZ	4.05332	3.00608	3.74127	6.86397	5.95709	7.47792
ENSG00000225190	0.913505	5.1839	35.5133	2.53309e-09	6.6328e-08	pleckstrin homology and RUN domain containing M1 [Source:HGNC Symbol;Acc:HGNC:29017]	PLEKHM1	26.6345	27.7443	21.4031	49.4357	49.5551	43.154
ENSG00000172216	0.911954	5.9432	33.7239	6.35147e-09	1.51237e-07	CCAAT/enhancer binding protein beta [Source:HGNC Symbol;Acc:HGNC:1834]	CEBPB	56.3205	44.4986	27.1194	92.2683	99.4807	49.3369
ENSG00000140691	0.910864	2.92698	15.3809	8.78742e-05	0.000624195	armadillo repeat containing 5 [Source:HGNC Symbol;Acc:HGNC:25781]	ARMC5	4.58302	5.064	5.49795	5.40874	12.0588	12.8238
ENSG00000070047	0.910695	6.08875	38.9335	4.38494e-10	1.33375e-08	PHD and ring finger domains 1 [Source:HGNC Symbol;Acc:HGNC:24351]	PHRF1	47.2581	45.0912	49.3106	84.8659	86.0389	95.61
ENSG00000128298	0.91031	-0.8469	5.97276	0.0145285	0.0433233	BAI1 associated protein 2 like 2 [Source:HGNC Symbol;Acc:HGNC:26203]	BAIAP2L2	0.264848	0.31246	0.512762	0.807526	0.424861	0.837022
ENSG00000116133	0.910282	5.31613	29.4124	5.85008e-08	1.09646e-06	24-dehydrocholesterol reductase [Source:HGNC Symbol;Acc:HGNC:2859]	DHCR24	17.3072	44.2292	17.9657	26.2446	97.6186	35.5181
ENSG00000162426	0.908605	0.940336	12.9787	0.000315059	0.00181874	solute carrier family 45 member 1 [Source:HGNC Symbol;Acc:HGNC:17939]	SLC45A1	1.20909	1.45455	1.26291	2.04405	2.90171	2.47158
ENSG00000105732	0.908541	3.5477	30.2545	3.7891e-08	7.44122e-07	zinc finger protein 574 [Source:HGNC Symbol;Acc:HGNC:26166]	ZNF574	7.83029	7.42361	9.0588	14.4766	14.0295	17.151
ENSG00000160460	0.907424	4.29223	30.9459	2.65318e-08	5.40244e-07	spectrin beta, non-erythrocytic 4 [Source:HGNC Symbol;Acc:HGNC:14896]	SPTBN4	13.5303	11.324	15.5538	24.4781	19.408	33.0545
ENSG00000043591	0.907212	5.28796	26.4994	2.63622e-07	4.11748e-06	adrenoceptor beta 1 [Source:HGNC Symbol;Acc:HGNC:285]	ADRB1	29.9969	15.5799	37.3937	43.7242	38.0386	69.4728
ENSG00000142513	0.906396	-1.22116	5.00873	0.0252198	0.0667402	acid phosphatase, testicular [Source:HGNC Symbol;Acc:HGNC:14376]	ACPT	0.149697	0.237038	0.484275	0.479469	0.406782	0.647507
ENSG00000218891	0.905762	2.74832	7.51497	0.00611883	0.0213022	zinc finger protein 579 [Source:HGNC Symbol;Acc:HGNC:26646]	ZNF579	8.54422	5.46266	1.65223	7.47803	10.4317	6.633
ENSG00000186710	0.905114	-1.69199	3.65377	0.0559424	0.125346	cilia and flagella associated protein 73 [Source:HGNC Symbol;Acc:HGNC:37100]	CFAP73	0.379999	0.0754213	0.189912	0.370116	0.262148	0.4422
ENSG00000079313	0.904683	4.7313	34.5501	4.1541e-09	1.03691e-07	RNA exonuclease 1 homolog [Source:HGNC Symbol;Acc:HGNC:24616]	REXO1	18.8042	17.153	19.485	35.2451	32.6149	35.8814
ENSG00000110047	0.90439	5.50108	30.4048	3.50665e-08	6.97197e-07	EH domain containing 1 [Source:HGNC Symbol;Acc:HGNC:3242]	EHD1	32.7951	30.718	30.5378	49.8731	58.4229	69.1964
ENSG00000163820	0.903295	8.26941	39.8858	2.69256e-10	8.59978e-09	FYVE and coiled-coil domain containing 1 [Source:HGNC Symbol;Acc:HGNC:14673]	FYCO1	215.298	234.786	192.58	462.965	409.72	335.835
ENSG00000135604	0.903252	3.24293	22.3184	2.30981e-06	2.72769e-05	syntaxin 11 [Source:HGNC Symbol;Acc:HGNC:11429]	STX11	5.9418	6.20609	7.28312	8.6052	13.3876	15.1848
ENSG00000060069	0.902529	4.31911	31.9286	1.59944e-08	3.44041e-07	CTD phosphatase subunit 1 [Source:HGNC Symbol;Acc:HGNC:2498]	CTDP1	13.3921	13.8344	14.3763	23.1491	27.1097	27.7165
ENSG00000130222	0.902364	5.32321	25.4985	4.42721e-07	6.53881e-06	growth arrest and DNA damage inducible gamma [Source:HGNC Symbol;Acc:HGNC:4097]	GADD45G	41.9957	37.883	7.89084	59.3448	74.2874	18.6987
ENSG00000164736	0.901522	4.19532	27.8154	1.33461e-07	2.27523e-06	SRY-box 17 [Source:HGNC Symbol;Acc:HGNC:18122]	SOX17	16.2709	8.66267	13.9585	26.3371	19.7244	24.779
ENSG00000136206	0.90085	1.29551	11.6406	0.000645271	0.00333887	speedy/RINGO cell cycle regulator family member E1 [Source:HGNC Symbol;Acc:HGNC:16408]	SPDYE1	1.58909	1.79934	1.61425	4.17222	2.72996	2.6453
ENSG00000197915	0.900358	4.63989	33.5998	6.77009e-09	1.59156e-07	hornerin [Source:HGNC Symbol;Acc:HGNC:20846]	HRNR	16.1903	16.3233	19.5514	30.2822	29.7493	37.2948
ENSG00000213999	0.899668	-1.19638	2.6635	0.102675	0.201691	myocyte enhancer factor 2B [Source:HGNC Symbol;Acc:HGNC:6995]	MEF2B	0.230303	0.538724	0.142434	0.546762	0.307346	0.702782
ENSG00000185924	0.899637	0.868169	11.1225	0.00085288	0.00421573	reticulon 4 receptor like 1 [Source:HGNC Symbol;Acc:HGNC:21329]	RTN4RL1	0.575756	0.398655	2.76322	1.2197	0.65989	5.0774
ENSG00000132613	0.899538	5.93954	36.3407	1.65669e-09	4.49974e-08	MTSS1L, I-BAR domain containing [Source:HGNC Symbol;Acc:HGNC:25094]	MTSS1L	38.8751	39.3699	50.4976	71.5754	79.2321	88.4953
ENSG00000105642	0.898199	-2.6592	2.46448	0.116446	0.221964	potassium calcium-activated channel subfamily N member 1 [Source:HGNC Symbol;Acc:HGNC:6290]	KCNN1	0.0345454	0.0538724	0.218399	0.109352	0.135594	0.252686
ENSG00000160113	0.898112	5.28961	30.632	3.11915e-08	6.29526e-07	nuclear receptor subfamily 2 group F member 6 [Source:HGNC Symbol;Acc:HGNC:7977]	NR2F6	33.2902	26.3005	22.6375	51.8331	57.1031	43.3514
ENSG00000153443	0.896221	2.59237	13.4299	0.00024765	0.00149589	UBA like domain containing 1 [Source:HGNC Symbol;Acc:HGNC:29576]	UBALD1	2.84424	5.67815	4.311	8.44538	7.85541	6.86989
ENSG00000213085	0.894465	-1.57285	4.74237	0.0294285	0.0754185	cilia and flagella associated protein 45 [Source:HGNC Symbol;Acc:HGNC:17229]	CFAP45	0.207272	0.161617	0.275372	0.285999	0.361584	0.568543
ENSG00000260428	0.894284	2.19164	17.2691	3.24417e-05	0.000267029	scleraxis bHLH transcription factor [Source:HGNC Symbol;Acc:HGNC:32322]	SCX	2.94787	4.38521	2.21247	5.31621	8.15371	4.24038
ENSG00000186603	0.894139	-0.629731	6.39373	0.0114524	0.0356637	4-hydroxyphenylpyruvate dioxygenase like [Source:HGNC Symbol;Acc:HGNC:28242]	HPDL	0.460605	0.398655	0.408311	0.647703	0.623732	1.16867
ENSG00000188385	0.894098	3.23938	25.3346	4.81985e-07	7.02164e-06	Janus kinase and microtubule interacting protein 3 [Source:HGNC Symbol;Acc:HGNC:23523]	JAKMIP3	7.86483	4.0512	7.7579	13.7784	7.34015	15.6665
ENSG00000196365	0.892906	6.72435	36.7114	1.36975e-09	3.77152e-08	lon peptidase 1, mitochondrial [Source:HGNC Symbol;Acc:HGNC:9479]	LONP1	86.9622	59.7768	76.6864	143.1	125.099	142.617
ENSG00000184524	0.892064	0.371689	10.7738	0.00102948	0.00493345	cell cycle exit and neuronal differentiation 1 [Source:HGNC Symbol;Acc:HGNC:24153]	CEND1	0.840604	1.08822	0.740657	1.53093	1.95255	1.45294
ENSG00000130311	0.891498	3.79281	16.3527	5.25811e-05	0.000404518	DET1 and DDB1 associated 1 [Source:HGNC Symbol;Acc:HGNC:28360]	DDA1	6.58665	7.84381	14.7752	10.6408	23.3945	19.7174
ENSG00000142627	0.890174	4.75165	33.0991	8.75777e-09	1.98062e-07	EPH receptor A2 [Source:HGNC Symbol;Acc:HGNC:3386]	EPHA2	12.92	17.9072	25.3627	22.7537	33.4736	49.0052
ENSG00000130518	0.890093	2.18538	15.3197	9.07649e-05	0.000642167	KIAA1683 [Source:HGNC Symbol;Acc:HGNC:29350]	KIAA1683	2.38363	4.33134	2.88666	5.65268	7.11416	4.75365
ENSG00000157570	0.890019	6.18003	31.4806	2.01446e-08	4.21432e-07	tetraspanin 18 [Source:HGNC Symbol;Acc:HGNC:20660]	TSPAN18	46.9241	54.8636	49.9563	111.817	88.0999	83.1889
ENSG00000114853	0.889677	7.82396	37.9424	7.28629e-10	2.10383e-08	zinc finger and BTB domain containing 47 [Source:HGNC Symbol;Acc:HGNC:26955]	ZBTB47	150.365	205.448	115.998	243.595	422.701	221.29
ENSG00000255330	0.889024	1.56026	3.97244	0.0462508	0.107963	SOGA family member 3 [Source:HGNC Symbol;Acc:HGNC:21494]	SOGA3	0.87515	3.67409	1.65223	5.71998	3.87799	1.72932
ENSG00000169258	0.888822	-0.0261365	9.30849	0.00228094	0.00952765	G protein regulated inducer of neurite outgrowth 1 [Source:HGNC Symbol;Acc:HGNC:24835]	GPRIN1	0.679392	0.872732	0.47478	1.09352	1.59097	1.03443
ENSG00000253910	0.887427	5.1685	33.6147	6.71824e-09	1.58323e-07	protocadherin gamma subfamily B, 2 [Source:HGNC Symbol;Acc:HGNC:8709]	PCDHGB2	26.5999	23.1974	25.7521	47.6104	41.3471	51.0899
ENSG00000273820	0.886603	1.64821	14.6012	0.00013283	0.000885808	ubiquitin specific peptidase 27, X-linked [Source:HGNC Symbol;Acc:HGNC:13486]	USP27X	2.34909	1.9394	2.23147	4.58439	3.39889	4.12194
ENSG00000135540	0.886157	6.89392	38.3162	6.01616e-10	1.76573e-08	NHS like 1 [Source:HGNC Symbol;Acc:HGNC:21021]	NHSL1	71.7277	83.1358	96.2569	137.717	158.97	165.557
ENSG00000183837	0.884687	1.0527	11.3803	0.000742266	0.00375387	paraneoplastic Ma antigen 3 [Source:HGNC Symbol;Acc:HGNC:18742]	PNMA3	2.18787	0.764987	1.46232	3.11234	1.60001	3.14278
ENSG00000198754	0.88465	3.15058	21.3226	3.88127e-06	4.28947e-05	3-oxoacid CoA-transferase 2 [Source:HGNC Symbol;Acc:HGNC:18606]	OXCT2	7.07029	7.75762	3.63681	10.2203	17.4012	7.05151
ENSG00000172828	0.884588	-0.0838257	8.03033	0.00460005	0.0169228	carboxylesterase 3 [Source:HGNC Symbol;Acc:HGNC:1865]	CES3	0.587271	0.290911	1.12998	1.23652	0.67797	1.5477
ENSG00000173621	0.884392	3.75568	25.7469	3.89259e-07	5.85432e-06	leucine rich repeat and fibronectin type III domain containing 4 [Source:HGNC Symbol;Acc:HGNC:28456]	LRFN4	9.00483	7.43438	12.0309	14.2242	16.3797	21.7705
ENSG00000130300	0.884135	4.35572	28.185	1.10254e-07	1.91985e-06	plasmalemma vesicle associated protein [Source:HGNC Symbol;Acc:HGNC:13635]	PLVAP	6.77089	11.0546	23.3782	11.5998	18.3323	51.4531
ENSG00000054598	0.883914	2.86428	21.386	3.7551e-06	4.17017e-05	forkhead box C1 [Source:HGNC Symbol;Acc:HGNC:3800]	FOXC1	3.23575	4.63302	7.56799	6.09009	9.24751	12.7054
ENSG00000204950	0.883591	-1.29775	3.75087	0.0527801	0.119938	leucine rich repeat containing 10B [Source:HGNC Symbol;Acc:HGNC:37215]	LRRC10B	0.345454	0.323234	0.142434	0.285999	0.723168	0.489579
ENSG00000109501	0.883332	5.35526	22.2839	2.35175e-06	2.7727e-05	wolframin ER transmembrane glycoprotein [Source:HGNC Symbol;Acc:HGNC:12762]	WFS1	27.6593	22.0769	37.6121	46.7019	57.6184	53.751
ENSG00000180921	0.8828	2.63705	17.2028	3.35945e-05	0.00027495	family with sequence similarity 83 member H [Source:HGNC Symbol;Acc:HGNC:24797]	FAM83H	2.11878	6.86334	3.31396	3.5161	16.0814	5.27481
ENSG00000100139	0.882395	4.49399	23.2985	1.38708e-06	1.77116e-05	MICAL like 1 [Source:HGNC Symbol;Acc:HGNC:29804]	MICALL1	15.4878	18.3381	13.7116	31.8216	24.8679	30.7882
ENSG00000275832	0.88238	6.08921	35.2449	2.90749e-09	7.53924e-08	Rho GTPase activating protein 23 [Source:HGNC Symbol;Acc:HGNC:29293]	ARHGAP23	45.4617	46.0609	52.1213	82.5023	93.7135	88.4479
ENSG00000170092	0.882055	1.67159	7.91779	0.00489512	0.0177999	speedy/RINGO cell cycle regulator family member E5 [Source:HGNC Symbol;Acc:HGNC:35464]	SPDYE5	2.08424	2.49968	1.74719	6.7378	2.49493	3.36388
ENSG00000107147	0.881985	2.35697	15.6804	7.49965e-05	0.00054653	potassium sodium-activated channel subfamily T member 1 [Source:HGNC Symbol;Acc:HGNC:18865]	KCNT1	4.03029	0.905055	6.33356	6.72938	2.1695	10.3443
ENSG00000274183	0.881876	-3.04754	2.11024	0.146316	0.263008	H2A histone family member B1 [Source:HGNC Symbol;Acc:HGNC:22516]	H2AFB1	0.0806059	0.0969702	0.0379824	0.142999	0.108475	0.134239
ENSG00000166349	0.880336	1.18659	7.14978	0.00749733	0.0251559	recombination activating 1 [Source:HGNC Symbol;Acc:HGNC:9831]	RAG1	2.83272	1.17442	1.04452	2.63287	3.39889	2.44
ENSG00000180044	0.879884	-1.84453	4.11284	0.0425588	0.10098	chromosome 3 open reading frame 80 [Source:HGNC Symbol;Acc:HGNC:40048]	C3orf80	0.103636	0.226264	0.199408	0.159823	0.44294	0.394821
ENSG00000124782	0.87944	6.55991	38.3035	6.05525e-10	1.77396e-08	ras responsive element binding protein 1 [Source:HGNC Symbol;Acc:HGNC:10449]	RREB1	60.535	63.4401	75.6134	117.773	114.866	133.663
ENSG00000127452	0.878866	2.67371	10.7892	0.00102093	0.00490074	F-box and leucine rich repeat protein 12 [Source:HGNC Symbol;Acc:HGNC:13611]	FBXL12	5.35453	3.71719	3.70328	9.95949	4.02262	11.3235
ENSG00000156959	0.878399	-1.86976	3.46433	0.0627059	0.137292	lipoma HMGIC fusion partner-like 4 [Source:HGNC Symbol;Acc:HGNC:29568]	LHFPL4	0.230303	0.237038	0.0854604	0.336469	0.298307	0.323754
ENSG00000070182	0.877788	8.70874	41.5162	1.16896e-10	3.99416e-09	spectrin beta, erythrocytic [Source:HGNC Symbol;Acc:HGNC:11274]	SPTB	302.422	306.932	273.53	554.19	596.957	476.194
ENSG00000110237	0.87695	7.31243	38.6908	4.96533e-10	1.48728e-08	Rho guanine nucleotide exchange factor 17 [Source:HGNC Symbol;Acc:HGNC:21726]	ARHGEF17	114.08	119.823	101.337	217.83	226.749	173.706
ENSG00000105464	0.876902	-0.643663	4.77472	0.0288805	0.0743589	glutamate ionotropic receptor NMDA type subunit 2D [Source:HGNC Symbol;Acc:HGNC:4588]	GRIN2D	0.218787	1.08822	0.199408	0.462645	1.08475	0.6633
ENSG00000145536	0.87689	-0.62717	4.22088	0.0399294	0.0962449	ADAM metallopeptidase with thrombospondin type 1 motif 16 [Source:HGNC Symbol;Acc:HGNC:17108]	ADAMTS16	0.172727	1.12054	0.265877	0.538351	0.931078	0.726472
ENSG00000013619	0.875557	1.35666	11.7372	0.000612617	0.00318843	mastermind like domain containing 1 [Source:HGNC Symbol;Acc:HGNC:2568]	MAMLD1	1.26666	1.37913	2.73473	3.09552	2.09719	4.57993
ENSG00000135747	0.874911	-3.44561	1.33837	0.247321	0.387876	ZNF670-ZNF695 readthrough (NMD candidate) [Source:HGNC Symbol;Acc:HGNC:49200]	ZNF670-ZNF695	0.0345454	0.0430979	0.0569736	0.109352	0.162713	0.0236893
ENSG00000147119	0.874791	4.11018	29.521	5.53147e-08	1.04654e-06	carbohydrate sulfotransferase 7 [Source:HGNC Symbol;Acc:HGNC:13817]	CHST7	14.8545	9.02901	12.7241	25.5717	16.9221	24.3289
ENSG00000150510	0.874768	3.29155	22.3911	2.22405e-06	2.64002e-05	family with sequence similarity 124 member A [Source:HGNC Symbol;Acc:HGNC:26413]	FAM124A	5.20484	4.75154	10.5211	11.5914	7.15936	19.291
ENSG00000262209	0.874138	5.08116	32.063	1.49251e-08	3.22773e-07	protocadherin gamma subfamily B, 3 [Source:HGNC Symbol;Acc:HGNC:8710]	PCDHGB3	23.9169	20.6116	27.2524	43.7999	39.485	47.8524
ENSG00000081059	0.873869	3.01554	15.7322	7.2972e-05	0.000534939	transcription factor 7 (T-cell specific, HMG-box) [Source:HGNC Symbol;Acc:HGNC:11639]	TCF7	5.67696	7.45593	4.19705	9.92584	9.79892	11.2919
ENSG00000161328	0.873802	-0.645457	6.33036	0.0118688	0.0367106	leucine rich repeat containing 56 [Source:HGNC Symbol;Acc:HGNC:25430]	LRRC56	0.299393	0.430979	0.541249	0.689762	0.533336	1.16078
ENSG00000107338	0.873527	5.19487	30.4949	3.34747e-08	6.67204e-07	SH2 domain containing adaptor protein B [Source:HGNC Symbol;Acc:HGNC:10838]	SHB	22.7999	31.7524	21.7829	40.3595	67.1371	35.7708
ENSG00000242441	0.87337	-3.29247	1.25397	0.262796	0.405518	general transcription factor IIA subunit 1 like [Source:HGNC Symbol;Acc:HGNC:30727]	GTF2A1L	0.0690908	0.0215489	0.0379824	0.302822	0.0180792	0.0315857
ENSG00000100335	0.873299	4.88841	19.601	9.54189e-06	9.45048e-05	mitochondrial elongation factor 1 [Source:HGNC Symbol;Acc:HGNC:25979]	MIEF1	15.5569	31.1059	17.6428	40.9988	40.6239	31.6094
ENSG00000128487	0.872993	3.91818	18.2006	1.98813e-05	0.000175826	sperm antigen with calponin homology and coiled-coil domains 1 [Source:HGNC Symbol;Acc:HGNC:30615]	SPECC1	9.96058	11.7657	9.43862	12.1465	24.9402	22.2758
ENSG00000186193	0.872111	-0.961398	6.20558	0.0127348	0.0388623	suppressor APC domain containing 2 [Source:HGNC Symbol;Acc:HGNC:28055]	SAPCD2	0.276363	0.398655	0.360833	0.546762	0.723168	0.623818
ENSG00000171823	0.871629	3.03638	21.4421	3.64673e-06	4.0639e-05	F-box and leucine rich repeat protein 14 [Source:HGNC Symbol;Acc:HGNC:28624]	FBXL14	5.73453	6.24919	5.31753	9.16037	10.8656	11.7183
ENSG00000181649	0.871531	-1.62388	3.76027	0.0524841	0.119417	pleckstrin homology like domain family A member 2 [Source:HGNC Symbol;Acc:HGNC:12385]	PHLDA2	0.092121	0.430979	0.142434	0.142999	0.569494	0.434304
ENSG00000198844	0.871257	4.84052	31.3891	2.11162e-08	4.38324e-07	Rho guanine nucleotide exchange factor 15 [Source:HGNC Symbol;Acc:HGNC:15590]	ARHGEF15	19.1842	15.4075	25.7521	37.9201	25.7538	47.6786
ENSG00000111249	0.871223	0.682833	9.9221	0.00163306	0.00724723	cut like homeobox 2 [Source:HGNC Symbol;Acc:HGNC:19347]	CUX2	0.736968	2.29496	0.246886	1.22811	4.565	0.450096
ENSG00000119669	0.87102	5.77963	28.7566	8.20707e-08	1.47773e-06	interferon regulatory factor 2 binding protein like [Source:HGNC Symbol;Acc:HGNC:14282]	IRF2BPL	33.8545	29.813	52.8715	52.2453	66.2422	94.3702
ENSG00000168502	0.870928	4.99084	31.3434	2.16198e-08	4.47619e-07	microtubule crosslinking factor 1 [Source:HGNC Symbol;Acc:HGNC:29121]	MTCL1	24.5502	21.7752	21.0992	42.8157	41.9437	38.424
ENSG00000171119	0.870571	2.34378	13.2894	0.000266907	0.00159023	neurturin [Source:HGNC Symbol;Acc:HGNC:8007]	NRTN	5.19332	3.57712	2.26945	6.57797	7.27687	5.41695
ENSG00000175857	0.870396	-1.28311	4.54794	0.0329584	0.0827226	GRB2 binding adaptor protein, transmembrane [Source:HGNC Symbol;Acc:HGNC:26588]	GAPT	0.241818	0.280136	0.265877	0.445822	0.786445	0.307961
ENSG00000099866	0.870017	-1.36437	5.01721	0.0250965	0.0664772	mucosal vascular addressin cell adhesion molecule 1 [Source:HGNC Symbol;Acc:HGNC:6765]	MADCAM1	0.299393	0.215489	0.246886	0.529939	0.316386	0.568543
ENSG00000163531	0.868465	5.54149	16.2628	5.51346e-05	0.000420329	neurofascin [Source:HGNC Symbol;Acc:HGNC:29866]	NFASC	28.0624	38.6911	30.9841	78.3216	44.3302	58.8679
ENSG00000180739	0.868377	-1.21651	4.60244	0.0319264	0.0806337	sphingosine-1-phosphate receptor 5 [Source:HGNC Symbol;Acc:HGNC:14299]	S1PR5	0.172727	0.40943	0.294364	0.563586	0.560455	0.434304
ENSG00000134780	0.868359	3.13646	22.9207	1.68828e-06	2.09726e-05	diacylglycerol lipase alpha [Source:HGNC Symbol;Acc:HGNC:1165]	DAGLA	4.46787	6.85256	7.46354	9.57255	11.3085	12.9028
ENSG00000166833	0.867554	6.60609	31.4446	2.05212e-08	4.27637e-07	neuron navigator 2 [Source:HGNC Symbol;Acc:HGNC:15997]	NAV2	55.2611	84.7843	68.6817	123.88	132.71	118.999
ENSG00000090316	0.866029	5.18454	15.0682	0.000103694	0.000720284	macrophage erythroblast attacher [Source:HGNC Symbol;Acc:HGNC:13731]	MAEA	35.9502	20.7301	21.8494	37.9537	49.0127	52.5349
ENSG00000113196	0.865766	3.2509	24.004	9.61351e-07	1.27742e-05	heart and neural crest derivatives expressed 1 [Source:HGNC Symbol;Acc:HGNC:4807]	HAND1	7.79574	5.45188	6.9033	14.9645	10.3865	11.434
ENSG00000104899	0.865691	-1.59357	4.23609	0.0395731	0.0956212	anti-Mullerian hormone [Source:HGNC Symbol;Acc:HGNC:464]	AMH	0.264848	0.258587	0.142434	0.420587	0.361584	0.402718
ENSG00000132436	0.863521	2.82011	18.1876	2.00181e-05	0.000176646	fidgetin like 1 [Source:HGNC Symbol;Acc:HGNC:13286]	FIGNL1	5.22787	4.76232	4.89973	7.64626	10.6215	9.04141
ENSG00000126262	0.863487	-1.34538	3.67508	0.0552315	0.1241	free fatty acid receptor 2 [Source:HGNC Symbol;Acc:HGNC:4501]	FFAR2	0.0690908	0.0430979	0.655196	0.117764	0.090396	1.17657
ENSG00000243709	0.863273	-1.80888	3.96518	0.0464504	0.108319	left-right determination factor 1 [Source:HGNC Symbol;Acc:HGNC:6552]	LEFTY1	0.264848	0.204715	0.104452	0.353293	0.415821	0.244789
ENSG00000197976	0.862767	5.30843	28.7886	8.07257e-08	1.45515e-06	A-kinase anchoring protein 17A [Source:HGNC Symbol;Acc:HGNC:18783]	AKAP17A	28.4308	22.6695	32.9972	44.0775	45.1618	64.2296
ENSG00000160999	0.862164	0.36611	9.39749	0.00217283	0.00916062	SH2B adaptor protein 2 [Source:HGNC Symbol;Acc:HGNC:17381]	SH2B2	0.794544	0.91583	0.940064	1.37111	1.38306	2.14783
ENSG00000141564	0.861666	5.93122	33.7334	6.32068e-09	1.50728e-07	regulatory associated protein of MTOR complex 1 [Source:HGNC Symbol;Acc:HGNC:30287]	RPTOR	44.6211	42.0097	43.243	80.8031	80.2897	74.9766
ENSG00000008710	0.861435	8.4559	24.0699	9.2903e-07	1.24064e-05	polycystin 1, transient receptor potential channel interacting [Source:HGNC Symbol;Acc:HGNC:9008]	PKD1	264.629	222.267	251.586	489.807	547.691	330.679
ENSG00000126231	0.861421	-1.61	4.28698	0.0384054	0.0933627	protein Z, vitamin K dependent plasma glycoprotein [Source:HGNC Symbol;Acc:HGNC:9460]	PROZ	0.299393	0.280136	0.094956	0.462645	0.461019	0.244789
ENSG00000164976	0.8609	3.67718	27.6545	1.45038e-07	2.44399e-06	KIAA1161 [Source:HGNC Symbol;Acc:HGNC:19918]	KIAA1161	8.30241	11.2593	7.52051	15.8982	20.9899	12.6185
ENSG00000100393	0.860786	6.61311	26.9422	2.09629e-07	3.39738e-06	E1A binding protein p300 [Source:HGNC Symbol;Acc:HGNC:3373]	EP300	58.5544	79.7203	70.7992	140.577	116.764	120.744
ENSG00000105738	0.860431	4.60389	30.5812	3.20185e-08	6.41991e-07	signal induced proliferation associated 1 like 3 [Source:HGNC Symbol;Acc:HGNC:23801]	SIPA1L3	13.8872	20.8271	17.282	27.1026	35.5256	31.0961
ENSG00000173093	0.860047	0.316152	7.35175	0.00669974	0.0229017	coiled-coil domain containing 63 [Source:HGNC Symbol;Acc:HGNC:26669]	CCDC63	0.564241	1.97173	0.256381	1.57299	2.54917	0.4422
ENSG00000162337	0.859161	6.68417	35.0137	3.27398e-09	8.3411e-08	LDL receptor related protein 5 [Source:HGNC Symbol;Acc:HGNC:6697]	LRP5	73.2938	74.7856	70.8656	140.047	120.868	136.956
ENSG00000137860	0.858762	0.450034	8.27494	0.00401961	0.0151989	solute carrier family 28 member 2 [Source:HGNC Symbol;Acc:HGNC:11002]	SLC28A2	1.25515	0.635694	0.79763	2.94411	0.750286	1.63456
ENSG00000176723	0.858314	1.91455	13.7528	0.000208513	0.00129832	zinc finger protein 843 [Source:HGNC Symbol;Acc:HGNC:28710]	ZNF843	2.30303	1.72392	3.90269	4.87039	2.76612	6.83831
ENSG00000169951	0.857955	3.20911	20.4045	6.26832e-06	6.55678e-05	zinc finger protein 764 [Source:HGNC Symbol;Acc:HGNC:28200]	ZNF764	6.16059	5.44111	8.23268	11.3054	12.1492	12.0105
ENSG00000143858	0.857855	2.78601	18.2893	1.8977e-05	0.000168948	synaptotagmin 2 [Source:HGNC Symbol;Acc:HGNC:11510]	SYT2	3.53514	3.82494	7.58698	7.8145	6.76162	11.6472
ENSG00000075218	0.85762	-1.59504	4.23664	0.0395604	0.0956049	G2 and S-phase expressed 1 [Source:HGNC Symbol;Acc:HGNC:13698]	GTSE1	0.092121	0.398655	0.189912	0.218705	0.605653	0.347443
ENSG00000177710	0.857487	-0.847839	5.86931	0.0154071	0.0454026	solute carrier family 35 member G5 [Source:HGNC Symbol;Acc:HGNC:15546]	SLC35G5	0.345454	0.280136	0.512762	0.563586	0.705088	0.765954
ENSG00000197467	0.857446	1.89753	14.3245	0.000153849	0.00100099	collagen type XIII alpha 1 chain [Source:HGNC Symbol;Acc:HGNC:2190]	COL13A1	2.15333	3.28621	2.49734	4.22269	5.3876	4.6352
ENSG00000167491	0.856846	5.07231	27.3588	1.68991e-07	2.79183e-06	GATA zinc finger domain containing 2A [Source:HGNC Symbol;Acc:HGNC:29989]	GATAD2A	25.2296	21.6136	24.8975	39.8211	47.1234	43.004
ENSG00000175264	0.856564	1.30214	12.4862	0.00040997	0.00227406	carbohydrate sulfotransferase 1 [Source:HGNC Symbol;Acc:HGNC:1969]	CHST1	1.6006	1.38991	2.165	2.90205	2.33222	4.2088
ENSG00000155026	0.854993	-2.39562	2.61061	0.106151	0.206842	radial spoke head 10 homolog B [Source:HGNC Symbol;Acc:HGNC:27362]	RSPH10B	0.103636	0.183166	0.0759648	0.142999	0.22599	0.276375
ENSG00000116128	0.854813	4.2214	21.4683	3.59718e-06	4.02267e-05	B-cell CLL/lymphoma 9 [Source:HGNC Symbol;Acc:HGNC:1008]	BCL9	11.9642	14.19	13.3318	29.1046	23.7109	19.441
ENSG00000179603	0.853993	0.893618	11.2174	0.000810342	0.00403911	glutamate metabotropic receptor 8 [Source:HGNC Symbol;Acc:HGNC:4600]	GRM8	1.00182	1.18519	1.74719	2.06087	2.08815	2.8743
ENSG00000159905	0.853967	3.09101	22.3424	2.28118e-06	2.69985e-05	zinc finger protein 221 [Source:HGNC Symbol;Acc:HGNC:13014]	ZNF221	6.25271	8.13472	4.01664	10.7838	13.4148	8.37022
ENSG00000176108	0.853711	4.20848	25.4348	4.57578e-07	6.72724e-06	charged multivesicular body protein 6 [Source:HGNC Symbol;Acc:HGNC:25675]	CHMP6	13.4842	14.2438	11.6511	20.3396	27.0284	24.0051
ENSG00000215131	0.853587	-2.2561	3.13721	0.0765247	0.160469	chromosome 16 open reading frame 90 [Source:HGNC Symbol;Acc:HGNC:34455]	C16orf90	0.138182	0.0754213	0.189912	0.260764	0.189831	0.260582
ENSG00000185269	0.853584	-1.10092	4.06944	0.0436658	0.102979	NOTUM, palmitoleoyl-protein carboxylesterase [Source:HGNC Symbol;Acc:HGNC:27106]	NOTUM	0.115151	0.301685	0.522258	0.412175	0.298307	0.963364
ENSG00000253953	0.853533	5.11595	27.6371	1.46344e-07	2.46081e-06	protocadherin gamma subfamily B, 4 [Source:HGNC Symbol;Acc:HGNC:8711]	PCDHGB4	24.4696	22.217	27.015	52.8173	36.981	44.3779
ENSG00000183580	0.853387	4.9314	19.432	1.04244e-05	0.000101923	F-box and leucine rich repeat protein 7 [Source:HGNC Symbol;Acc:HGNC:13604]	FBXL7	16.5703	27.7981	21.536	43.4802	37.4058	36.1104
ENSG00000118898	0.852982	5.4513	32.4195	1.24233e-08	2.7123e-07	periplakin [Source:HGNC Symbol;Acc:HGNC:9273]	PPL	23.5484	36.45	33.7948	44.4728	63.7111	60.3524
ENSG00000012232	0.852917	6.67584	24.3888	7.87237e-07	1.07825e-05	exostosin like glycosyltransferase 3 [Source:HGNC Symbol;Acc:HGNC:3518]	EXTL3	50.6896	81.3149	90.1892	122.323	145.845	122.9
ENSG00000132003	0.852563	2.57588	17.5547	2.79162e-05	0.000235369	zinc finger SWIM-type containing 4 [Source:HGNC Symbol;Acc:HGNC:25704]	ZSWIM4	2.8903	5.20407	4.70982	5.84615	8.23507	8.70187
ENSG00000105647	0.851941	4.33745	22.5301	2.06881e-06	2.47964e-05	phosphoinositide-3-kinase regulatory subunit 2 [Source:HGNC Symbol;Acc:HGNC:8980]	PIK3R2	16.2824	14.1684	12.1164	25.109	34.4318	19.0304
ENSG00000161509	0.851544	0.0649099	7.91033	0.00491533	0.0178572	glutamate ionotropic receptor NMDA type subunit 2C [Source:HGNC Symbol;Acc:HGNC:4587]	GRIN2C	0.541211	0.700341	0.911577	1.28699	0.90396	1.74511
ENSG00000244165	0.851305	1.58238	4.75226	0.0292599	0.0751185	purinergic receptor P2Y11 [Source:HGNC Symbol;Acc:HGNC:8540]	P2RY11	1.26666	1.64849	1.97508	1.46364	1.75368	9.59416
ENSG00000242419	0.851194	3.85897	26.8283	2.22351e-07	3.57032e-06	protocadherin gamma subfamily C, 4 [Source:HGNC Symbol;Acc:HGNC:8717]	PCDHGC4	10.1333	8.89971	11.8125	18.6656	14.9334	22.418
ENSG00000132016	0.850923	-1.16892	4.16186	0.0413439	0.0987533	chromosome 19 open reading frame 57 [Source:HGNC Symbol;Acc:HGNC:28153]	C19orf57	0.207272	0.150843	0.607718	0.445822	0.44294	0.647507
ENSG00000165816	0.850711	-1.02227	4.82769	0.0280062	0.0725157	von Willebrand factor A domain containing 2 [Source:HGNC Symbol;Acc:HGNC:24709]	VWA2	0.310908	0.420204	0.265877	0.504704	0.524297	0.77385
ENSG00000152315	0.850128	-0.483038	5.44871	0.0195828	0.0548457	potassium two pore domain channel subfamily K member 13 [Source:HGNC Symbol;Acc:HGNC:6275]	KCNK13	1.26666	0.0969702	0.32285	1.5057	0.280227	0.694886
ENSG00000132510	0.850092	4.33875	10.5908	0.00113651	0.00533761	lysine demethylase 6B [Source:HGNC Symbol;Acc:HGNC:29012]	KDM6B	8.6824	13.3388	22.1437	31.6618	17.3651	28.0007
ENSG00000140406	0.849345	4.03197	27.9235	1.26207e-07	2.16538e-06	mesoderm development candidate 1 [Source:HGNC Symbol;Acc:HGNC:13519]	MESDC1	10.4557	12.4876	11.9929	18.3207	22.3007	22.4101
ENSG00000154783	0.847977	5.42101	31.584	1.90996e-08	4.01668e-07	FYVE, RhoGEF and PH domain containing 5 [Source:HGNC Symbol;Acc:HGNC:19117]	FGD5	24.5157	28.9833	38.0868	45.4402	49.1031	70.7283
ENSG00000198482	0.847929	4.71485	25.746	3.89436e-07	5.85432e-06	zinc finger protein 808 [Source:HGNC Symbol;Acc:HGNC:33230]	ZNF808	19.6793	20.1806	16.4084	35.5311	30.3369	35.2497
ENSG00000166963	0.847534	7.42611	34.629	3.98916e-09	1.00198e-07	microtubule associated protein 1A [Source:HGNC Symbol;Acc:HGNC:6835]	MAP1A	89.5301	146.985	135.274	181.761	247.504	230.647
ENSG00000175048	0.847474	4.47215	27.4428	1.61811e-07	2.68428e-06	zinc finger DHHC-type containing 14 [Source:HGNC Symbol;Acc:HGNC:20341]	ZDHHC14	17.4684	20.6978	9.9134	32.9572	32.3889	19.591
ENSG00000251322	0.847287	6.4671	32.3924	1.25977e-08	2.74664e-07	SH3 and multiple ankyrin repeat domains 3 [Source:HGNC Symbol;Acc:HGNC:14294]	SHANK3	69.9889	46.6966	69.1469	142.394	69.4241	132.96
ENSG00000172985	0.847152	4.67244	28.7418	8.26978e-08	1.48735e-06	SH3 domain containing ring finger 3 [Source:HGNC Symbol;Acc:HGNC:24699]	SH3RF3	18.7466	20.8055	14.6707	35.6826	39.0149	23.9183
ENSG00000100036	0.846974	2.30685	15.0296	0.000105838	0.000731382	solute carrier family 35 member E4 [Source:HGNC Symbol;Acc:HGNC:17058]	SLC35E4	3.8806	3.51248	3.16203	5.77886	6.85201	6.33294
ENSG00000148400	0.846819	6.46596	36.5987	1.45128e-09	3.96873e-08	notch 1 [Source:HGNC Symbol;Acc:HGNC:7881]	NOTCH1	56.0326	46.3625	84.9666	102.278	76.5021	164.033
ENSG00000198824	0.84623	3.1199	19.7441	8.85353e-06	8.89516e-05	chromosome alignment maintaining phosphoprotein 1 [Source:HGNC Symbol;Acc:HGNC:20311]	CHAMP1	4.88241	7.52058	6.32407	11.3138	11.643	10.2969
ENSG00000130589	0.846103	5.69117	31.6013	1.89308e-08	3.99165e-07	helicase with zinc finger 2 [Source:HGNC Symbol;Acc:HGNC:30021]	HELZ2	35.363	34.4352	40.6601	58.2765	64.1178	76.9586
ENSG00000181350	0.845974	1.63785	6.94436	0.00840841	0.0276456	leucine rich repeat containing 75A [Source:HGNC Symbol;Acc:HGNC:32403]	LRRC75A	1.12848	2.42426	3.40892	3.91987	4.19437	3.41126
ENSG00000188859	0.844937	1.01157	10.6791	0.00108352	0.00513558	family with sequence similarity 78 member B [Source:HGNC Symbol;Acc:HGNC:13495]	FAM78B	1.79636	1.52997	1.00653	2.65811	2.71188	2.24259
ENSG00000109927	0.844141	2.58438	15.7266	7.31889e-05	0.000536284	tectorin alpha [Source:HGNC Symbol;Acc:HGNC:11720]	TECTA	4.58302	4.94548	3.37094	8.32761	7.08704	7.50161
ENSG00000008853	0.843107	6.11313	21.0705	4.4269e-06	4.82264e-05	Rho related BTB domain containing 2 [Source:HGNC Symbol;Acc:HGNC:18756]	RHOBTB2	51.1962	37.1827	61.3226	73.2493	96.6785	95.5073
ENSG00000164056	0.843099	4.77121	11.8488	0.000576999	0.00303062	sprouty RTK signaling antagonist 1 [Source:HGNC Symbol;Acc:HGNC:11269]	SPRY1	12.6551	37.0642	13.8351	32.8142	35.39	31.9253
ENSG00000142459	0.842163	4.73904	27.8037	1.34272e-07	2.28662e-06	ecotropic viral integration site 5 like [Source:HGNC Symbol;Acc:HGNC:30464]	EVI5L	21.1878	19.5988	16.4179	33.4535	40.19	29.2168
ENSG00000186523	0.841992	0.90814	7.8508	0.00507983	0.0183274	family with sequence similarity 86 member B1 [Source:HGNC Symbol;Acc:HGNC:28268]	FAM86B1	1.76181	1.08822	1.06351	2.44781	1.48249	3.23754
ENSG00000182264	0.841725	-0.835761	4.90175	0.0268295	0.0700772	izumo sperm-egg fusion 1 [Source:HGNC Symbol;Acc:HGNC:28539]	IZUMO1	0.356969	0.366332	0.379824	0.857996	0.370623	0.860711
ENSG00000072195	0.841177	8.20289	34.1322	5.14914e-09	1.25785e-07	SPEG complex locus [Source:HGNC Symbol;Acc:HGNC:16901]	SPEG	258.273	217.569	152.832	435.795	453.318	249.993
ENSG00000236609	0.84052	4.48973	26.3448	2.85592e-07	4.41757e-06	zinc finger protein 853 [Source:HGNC Symbol;Acc:HGNC:21767]	ZNF853	19.3915	14.1146	14.9271	30.9215	29.7403	25.5371
ENSG00000074047	0.84005	2.3617	13.3432	0.00025936	0.00155548	GLI family zinc finger 2 [Source:HGNC Symbol;Acc:HGNC:4318]	GLI2	1.80787	5.6566	3.09556	2.3637	10.8114	6.93307
ENSG00000171861	0.83996	4.02335	23.6709	1.143e-06	1.48915e-05	mitochondrial rRNA methyltransferase 3 [Source:HGNC Symbol;Acc:HGNC:18485]	MRM3	13.9218	9.54618	11.6891	20.6676	20.2849	21.2809
ENSG00000144852	0.839697	-1.78045	4.00161	0.0454569	0.106498	nuclear receptor subfamily 1 group I member 2 [Source:HGNC Symbol;Acc:HGNC:7968]	NR1I2	0.230303	0.183166	0.161425	0.420587	0.280227	0.33165
ENSG00000184160	0.839356	2.83225	16.2896	5.43602e-05	0.000416207	adrenoceptor alpha 2C [Source:HGNC Symbol;Acc:HGNC:283]	ADRA2C	5.50423	3.17847	6.73238	7.6042	7.31303	12.2
ENSG00000128596	0.839238	3.79435	25.2763	4.96782e-07	7.19145e-06	coiled-coil domain containing 136 [Source:HGNC Symbol;Acc:HGNC:22225]	CCDC136	8.76301	13.5112	7.66295	17.3282	22.4453	13.3766
ENSG00000267221	0.839011	-0.51844	6.44257	0.0111417	0.0349268			0.460605	0.31246	0.626709	0.639292	0.560455	1.40556
ENSG00000236782	0.838891	-3.10705	1.77503	0.18276	0.310379			0.0690908	0.0430979	0.0854604	0.0588821	0.144634	0.165825
ENSG00000163866	0.838597	4.52506	13.1198	0.000292191	0.00171014	small integral membrane protein 12 [Source:HGNC Symbol;Acc:HGNC:25154]	SMIM12	14.6127	14.5779	18.4215	21.5256	45.9031	22.9312
ENSG00000198680	0.838114	3.15817	21.1268	4.29869e-06	4.70858e-05	tumor suppressor candidate 1 [Source:HGNC Symbol;Acc:HGNC:31010]	TUSC1	7.73816	5.32259	6.21962	11.9447	11.1097	11.055
ENSG00000140836	0.838011	6.44889	29.7001	5.04332e-08	9.69054e-07	zinc finger homeobox 3 [Source:HGNC Symbol;Acc:HGNC:777]	ZFHX3	58.9114	80.1728	49.8804	128.699	116.701	89.6245
ENSG00000277203	0.837767	2.34786	15.6784	7.50787e-05	0.000546704	coagulation factor VIII-associated 1 [Source:HGNC Symbol;Acc:HGNC:3547]	F8A1	4.32969	2.91988	3.70328	6.76303	5.68591	6.96465
ENSG00000164236	0.837726	6.48413	35.139	3.06987e-09	7.89569e-08	ankyrin repeat domain 33B [Source:HGNC Symbol;Acc:HGNC:35240]	ANKRD33B	56.4356	58.473	78.7565	105.466	110.88	126.911
ENSG00000167625	0.837703	3.53599	25.0533	5.57668e-07	7.90852e-06	zinc finger protein 526 [Source:HGNC Symbol;Acc:HGNC:29415]	ZNF526	7.26604	8.09163	9.56207	12.769	16.0091	15.7139
ENSG00000114867	0.837451	8.16463	33.6218	6.6939e-09	1.57982e-07	eukaryotic translation initiation factor 4 gamma 1 [Source:HGNC Symbol;Acc:HGNC:3296]	EIF4G1	207.503	208.174	199.047	411.056	388.874	306.847
ENSG00000197119	0.837313	5.04039	29.1864	6.57389e-08	1.22212e-06	solute carrier family 25 member 29 [Source:HGNC Symbol;Acc:HGNC:20116]	SLC25A29	25.7018	16.7004	28.0785	44.4223	28.99	53.3562
ENSG00000128016	0.836533	5.42961	17.2192	3.33062e-05	0.000273148	ZFP36 ring finger protein [Source:HGNC Symbol;Acc:HGNC:12862]	ZFP36	31.2521	40.7059	22.2007	48.3338	54.1291	61.8054
ENSG00000169181	0.83637	1.99108	13.3824	0.000253999	0.0015279	GSG1 like [Source:HGNC Symbol;Acc:HGNC:28283]	GSG1L	4.43332	2.27341	1.5098	9.22767	3.83279	2.4242
ENSG00000183908	0.83616	-0.310958	6.71926	0.0095377	0.0306419	leucine rich repeat containing 55 [Source:HGNC Symbol;Acc:HGNC:32324]	LRRC55	0.564241	0.387881	0.750152	0.942114	0.985316	1.04233
ENSG00000198435	0.835247	1.71841	8.95766	0.00276309	0.0111561	NOTCH-regulated ankyrin repeat protein [Source:HGNC Symbol;Acc:HGNC:33843]	NRARP	1.84242	1.0128	4.58637	2.55717	3.04634	6.48297
ENSG00000254206	0.834796	2.91045	11.8602	0.000573451	0.00301396	nuclear pore complex interacting protein family member B11 [Source:HGNC Symbol;Acc:HGNC:37453]	NPIPB11	4.76726	4.95626	5.8208	12.3737	5.37856	11.6078
ENSG00000009950	0.834783	0.200703	6.76081	0.00931813	0.0300899	MLX interacting protein like [Source:HGNC Symbol;Acc:HGNC:12744]	MLXIPL	0.47212	0.40943	1.64274	1.39635	0.632772	2.13204
ENSG00000130803	0.834169	4.48927	22.6596	1.93396e-06	2.34608e-05	zinc finger protein 317 [Source:HGNC Symbol;Acc:HGNC:13507]	ZNF317	14.0254	20.3314	14.4333	27.54	27.9504	30.2986
ENSG00000176022	0.83357	3.80645	21.6878	3.20828e-06	3.6334e-05	beta-1,3-galactosyltransferase 6 [Source:HGNC Symbol;Acc:HGNC:17978]	B3GALT6	9.5921	11.324	8.81191	13.4419	23.5301	17.08
ENSG00000162728	0.833418	-2.30757	2.57707	0.108422	0.210093	potassium voltage-gated channel subfamily J member 9 [Source:HGNC Symbol;Acc:HGNC:6270]	KCNJ9	0.149697	0.150843	0.0854604	0.201882	0.180792	0.307961
ENSG00000171811	0.833286	-0.370557	5.27129	0.0216799	0.0591555	cilia and flagella associated protein 46 [Source:HGNC Symbol;Acc:HGNC:25247]	CFAP46	0.230303	0.764987	0.674187	0.723409	0.786445	1.28712
ENSG00000280987	0.832739	4.67926	19.2768	1.1307e-05	0.0001085	matrin 3 [Source:EntrezGene;Acc:9782]		16.2133	15.9031	23.5301	36.9527	31.4216	29.5169
ENSG00000196843	0.832727	4.00531	25.4254	4.59831e-07	6.75416e-06	AT-rich interaction domain 5A [Source:HGNC Symbol;Acc:HGNC:17361]	ARID5A	10.0757	15.6661	8.29915	16.8319	31.3132	14.0162
ENSG00000197362	0.832645	2.0089	9.8837	0.0016675	0.00737351	zinc finger protein 786 [Source:HGNC Symbol;Acc:HGNC:21806]	ZNF786	2.02666	4.22359	2.5923	5.53492	5.11641	4.48517
ENSG00000172508	0.832593	4.79445	27.8548	1.30767e-07	2.23406e-06	carnosine synthase 1 [Source:HGNC Symbol;Acc:HGNC:29268]	CARNS1	22.5351	23.2298	14.5093	40.9231	36.0228	29.122
ENSG00000181409	0.832312	3.77404	22.4143	2.19727e-06	2.61017e-05	apoptosis associated tyrosine kinase [Source:HGNC Symbol;Acc:HGNC:21]	AATK	12.0448	8.32867	8.99233	21.2228	17.9436	13.3844
ENSG00000181656	0.832283	-0.897694	4.39099	0.0361294	0.0889771	G protein-coupled receptor 88 [Source:HGNC Symbol;Acc:HGNC:4539]	GPR88	0.437575	0.0861958	0.664692	0.815938	0.298307	0.750161
ENSG00000166188	0.832083	3.93091	26.3112	2.90601e-07	4.47399e-06	zinc finger protein 319 [Source:HGNC Symbol;Acc:HGNC:13644]	ZNF319	11.4921	11.5179	9.83744	20.4657	20.5922	17.4353
ENSG00000176927	0.831381	-1.5892	3.91349	0.0479001	0.110957	EF-hand calcium binding domain 5 [Source:HGNC Symbol;Acc:HGNC:24801]	EFCAB5	0.126666	0.204715	0.332346	0.336469	0.271188	0.560646
ENSG00000083812	0.830982	3.57108	25.4428	4.55684e-07	6.70554e-06	zinc finger protein 324 [Source:HGNC Symbol;Acc:HGNC:14096]	ZNF324	6.92059	8.77042	9.9324	12.769	15.0148	17.7117
ENSG00000185022	0.830028	3.27807	7.24752	0.00709992	0.0240186	MAF bZIP transcription factor F [Source:HGNC Symbol;Acc:HGNC:6780]	MAFF	7.02423	9.45998	4.29201	8.71455	10.6938	17.838
ENSG00000181585	0.829661	-0.562182	5.84489	0.0156223	0.0459186	transmembrane inner ear [Source:HGNC Symbol;Acc:HGNC:30800]	TMIE	0.379999	0.474077	0.541249	1.03464	0.705088	0.765954
ENSG00000204131	0.829601	2.93002	19.3852	1.06829e-05	0.000103817	NHS like 2 [Source:HGNC Symbol;Acc:HGNC:33737]	NHSL2	3.67333	6.30306	6.476	6.9565	9.97971	12.1447
ENSG00000198727	0.829409	10.9935	11.9856	0.00053612	0.00285236	mitochondrially encoded cytochrome b [Source:HGNC Symbol;Acc:HGNC:7427]	MT-CYB	1632.12	1442.14	942.723	5069.24	1412.83	1733.27
ENSG00000173548	0.829097	5.50329	29.6784	5.10011e-08	9.77624e-07	sorting nexin 33 [Source:HGNC Symbol;Acc:HGNC:28468]	SNX33	24.8381	39.2622	34.5545	49.5871	65.4738	58.252
ENSG00000105376	0.828934	-1.06407	4.24297	0.0394131	0.0953352	intercellular adhesion molecule 5 [Source:HGNC Symbol;Acc:HGNC:5348]	ICAM5	0.161212	0.344783	0.398815	0.24394	0.424861	1.1134
ENSG00000148841	0.828744	6.22259	34.3117	4.69561e-09	1.15765e-07	inositol 1,4,5-trisphosphate receptor interacting protein [Source:HGNC Symbol;Acc:HGNC:29370]	ITPRIP	56.7696	59.1195	44.9901	109.857	100.611	76.548
ENSG00000173456	0.827989	3.48997	22.3346	2.29039e-06	2.70875e-05	ring finger protein 26 [Source:HGNC Symbol;Acc:HGNC:14646]	RNF26	7.40423	10.0849	6.8938	15.3178	14.9153	12.6264
ENSG00000161681	0.827477	-1.07262	4.84857	0.027669	0.071747	SH3 and multiple ankyrin repeat domains 1 [Source:HGNC Symbol;Acc:HGNC:15474]	SHANK1	0.172727	0.689566	0.161425	0.378528	1.03955	0.292168
ENSG00000120949	0.827435	2.45413	16.4173	5.08195e-05	0.000392852	TNF receptor superfamily member 8 [Source:HGNC Symbol;Acc:HGNC:11923]	TNFRSF8	2.30303	5.46266	4.06412	4.11334	9.20231	7.55688
ENSG00000006555	0.826981	-0.771213	5.1637	0.0230637	0.06213	tetratricopeptide repeat domain 22 [Source:HGNC Symbol;Acc:HGNC:26067]	TTC22	0.103636	0.538724	0.522258	0.142999	1.21131	0.837022
ENSG00000160233	0.826804	2.08917	11.8698	0.000570518	0.00300248	leucine rich repeat containing 3 [Source:HGNC Symbol;Acc:HGNC:14965]	LRRC3	2.18787	2.9522	4.16857	5.19845	5.10737	5.72491
ENSG00000176155	0.826634	4.32752	27.1905	1.84362e-07	3.01161e-06	coiled-coil domain containing 57 [Source:HGNC Symbol;Acc:HGNC:27564]	CCDC57	11.9988	16.6897	14.7941	22.3836	28.4566	25.9635
ENSG00000119737	0.826622	2.14092	11.6706	0.000634949	0.0032929	G protein-coupled receptor 75 [Source:HGNC Symbol;Acc:HGNC:4526]	GPR75	3.02848	3.55558	2.63028	6.71256	7.06896	3.3086
ENSG00000166813	0.826588	3.71488	25.3145	4.87045e-07	7.08892e-06	kinesin family member 7 [Source:HGNC Symbol;Acc:HGNC:30497]	KIF7	9.17756	11.9704	7.09321	15.5953	22.3007	12.4922
ENSG00000185338	0.826515	1.4075	11.3628	0.000749299	0.00378309	suppressor of cytokine signaling 1 [Source:HGNC Symbol;Acc:HGNC:19383]	SOCS1	1.56606	2.84446	1.10149	2.37211	5.99325	1.90304
ENSG00000140961	0.826483	2.01495	13.3634	0.000256589	0.0015429	oxidative stress induced growth inhibitor 1 [Source:HGNC Symbol;Acc:HGNC:30093]	OSGIN1	1.71575	3.5879	3.50388	3.54134	5.78534	5.93022
ENSG00000100311	0.826091	4.64972	26.5329	2.59084e-07	4.06156e-06	platelet derived growth factor subunit B [Source:HGNC Symbol;Acc:HGNC:8800]	PDGFB	13.2194	13.8991	26.863	25.9838	21.7312	48.6894
ENSG00000224051	0.825809	5.77676	26.345	2.8556e-07	4.41757e-06	ceramide-1-phosphate transfer protein [Source:HGNC Symbol;Acc:HGNC:28116]	CPTP	47.7302	32.8837	38.837	71.0034	69.1891	69.1332
ENSG00000141933	0.825397	3.05924	21.3582	3.80993e-06	4.2252e-05	tubulin polyglutamylase complex subunit 1 [Source:HGNC Symbol;Acc:HGNC:25058]	TPGS1	6.31029	5.78589	5.88727	10.4558	10.9198	10.4786
ENSG00000241563	0.825224	-1.87783	3.25206	0.0713339	0.151587	cortistatin [Source:HGNC Symbol;Acc:HGNC:2257]	CORT	0.218787	0.215489	0.113947	0.252352	0.361584	0.339546
ENSG00000162105	0.824899	-0.109745	7.2713	0.00700651	0.0237327	SH3 and multiple ankyrin repeat domains 2 [Source:HGNC Symbol;Acc:HGNC:14295]	SHANK2	0.333939	1.099	0.588727	0.773879	1.58193	1.03443
ENSG00000162849	0.824809	0.880963	10.6815	0.0010821	0.00513187	kinesin family member 26B [Source:HGNC Symbol;Acc:HGNC:25484]	KIF26B	0.909695	1.71314	1.31039	1.66552	3.02826	2.25838
ENSG00000185915	0.82429	4.6149	24.1642	8.84622e-07	1.18628e-05	kelch like family member 34 [Source:HGNC Symbol;Acc:HGNC:26634]	KLHL34	17.7103	20.4499	14.0725	26.0427	43.8149	24.7711
ENSG00000099822	0.823424	3.27399	21.9909	2.7394e-06	3.16503e-05	hyperpolarization activated cyclic nucleotide gated potassium channel 2 [Source:HGNC Symbol;Acc:HGNC:4846]	HCN2	9.23513	4.0943	7.7674	15.8729	7.98196	12.9028
ENSG00000167487	0.823045	2.96389	18.9105	1.36998e-05	0.000127491	kelch like family member 26 [Source:HGNC Symbol;Acc:HGNC:25623]	KLHL26	5.22787	4.84851	6.74187	10.9016	7.90061	10.9997
ENSG00000135956	0.822837	6.71008	32.8938	9.73354e-09	2.18766e-07	transmembrane protein 127 [Source:HGNC Symbol;Acc:HGNC:26038]	TMEM127	71.6701	77.6839	77.4461	135.606	138.695	126.904
ENSG00000130055	0.822499	0.159918	8.15529	0.00429358	0.0160721	glycerophosphodiester phosphodiesterase domain containing 2 [Source:HGNC Symbol;Acc:HGNC:25974]	GDPD2	0.840604	0.614145	0.921073	1.39635	1.40114	1.36608
ENSG00000105298	0.82249	4.14326	26.3748	2.81183e-07	4.36201e-06	cactin, spliceosome C complex subunit [Source:HGNC Symbol;Acc:HGNC:29938]	CACTIN	11.6418	12.2613	14.3668	21.3994	21.4962	24.6684
ENSG00000188483	0.822456	2.93989	14.7427	0.000123225	0.000830049	immediate early response 5 like [Source:HGNC Symbol;Acc:HGNC:23679]	IER5L	3.78848	5.08555	6.97926	4.6601	10.9018	14.4189
ENSG00000185950	0.822305	6.42078	35.7864	2.20179e-09	5.83202e-08	insulin receptor substrate 2 [Source:HGNC Symbol;Acc:HGNC:6126]	IRS2	75.2283	65.9829	44.5533	128.969	120.425	78.7274
ENSG00000099625	0.82163	0.811145	10.4178	0.00124807	0.00575713	CACN beta subunit associated regulatory protein [Source:HGNC Symbol;Acc:HGNC:28617]	CBARP	0.817574	1.27139	1.68072	1.58141	2.25086	2.74006
ENSG00000173269	0.821202	6.31172	33.6382	6.63778e-09	1.57618e-07	multimerin 2 [Source:HGNC Symbol;Acc:HGNC:19888]	MMRN2	44.0914	48.1834	77.2657	72.2231	82.179	152.456
ENSG00000150594	0.821081	0.144683	6.87053	0.00876284	0.0286172	adrenoceptor alpha 2A [Source:HGNC Symbol;Acc:HGNC:281]	ADRA2A	0.230303	0.538724	1.48131	0.538351	0.650851	2.96116
ENSG00000185340	0.820987	4.20032	24.5613	7.19837e-07	9.97009e-06	growth arrest specific 2 like 1 [Source:HGNC Symbol;Acc:HGNC:16955]	GAS2L1	17.7218	15.763	7.1122	29.1214	25.8171	14.6242
ENSG00000162009	0.82086	-0.385568	6.26526	0.0123128	0.0378357	somatostatin receptor 5 [Source:HGNC Symbol;Acc:HGNC:11334]	SSTR5	0.863634	0.258587	0.550745	1.16082	0.66893	0.939675
ENSG00000174672	0.820416	1.041	6.72967	0.0094822	0.0305248	BR serine/threonine kinase 2 [Source:HGNC Symbol;Acc:HGNC:11405]	BRSK2	1.7503	1.61617	1.00653	2.96934	1.68136	3.15068
ENSG00000178860	0.820409	1.70995	12.3347	0.000444609	0.00243087	musculin [Source:HGNC Symbol;Acc:HGNC:7321]	MSC	1.80787	1.83166	3.35195	3.35628	2.99211	6.08025
ENSG00000198646	0.820394	5.18597	19.2823	1.12749e-05	0.000108322	nuclear receptor coactivator 6 [Source:HGNC Symbol;Acc:HGNC:15936]	NCOA6	22.6157	29.6513	26.3693	55.9044	39.3584	44.3306
ENSG00000275572	0.819975	-2.74892	2.26567	0.132269	0.244166	galectin-related inter-fiber protein [Source:HGNC Symbol;Acc:HGNC:4577]	GRIFIN	0.115151	0.0861958	0.0759648	0.134588	0.180792	0.173721
ENSG00000136802	0.819967	5.98532	30.5765	3.20954e-08	6.42109e-07	leucine rich repeat containing 8 family member A [Source:HGNC Symbol;Acc:HGNC:19027]	LRRC8A	58.0017	50.0582	30.3005	95.389	89.492	56.7201
ENSG00000183044	0.819735	4.64358	15.4201	8.60697e-05	0.00061328	4-aminobutyrate aminotransferase [Source:HGNC Symbol;Acc:HGNC:23]	ABAT	10.1563	34.2844	11.841	28.6672	48.3618	16.5193
ENSG00000147689	0.819357	-1.57225	3.00967	0.0827689	0.170638	family with sequence similarity 83 member A [Source:HGNC Symbol;Acc:HGNC:28210]	FAM83A	0.0345454	0.247813	0.446293	0.126176	0.569494	0.4422
ENSG00000127528	0.818054	5.97365	27.6592	1.44681e-07	2.44054e-06	Kruppel like factor 2 [Source:HGNC Symbol;Acc:HGNC:6347]	KLF2	46.3599	35.7605	54.3148	69.1444	71.5665	99.7082
ENSG00000176715	0.817954	4.51052	18.3351	1.85261e-05	0.000165301	acyl-CoA synthetase family member 3 [Source:HGNC Symbol;Acc:HGNC:27288]	ACSF3	20.186	16.7651	12.7241	30.8206	23.7289	32.3596
ENSG00000079308	0.817427	10.4827	29.4379	5.77369e-08	1.08341e-06	tensin 1 [Source:HGNC Symbol;Acc:HGNC:11973]	TNS1	990.163	1062.76	1032.47	2221.16	1732	1546.82
ENSG00000172650	0.816539	3.04726	19.0279	1.2882e-05	0.000121082	ArfGAP with GTPase domain, ankyrin repeat and PH domain 5 [Source:HGNC Symbol;Acc:HGNC:23467]	AGAP5	7.10483	3.14615	8.06176	11.8774	6.6893	12.5237
ENSG00000240764	0.815982	3.63228	25.2133	5.1328e-07	7.40108e-06	protocadherin gamma subfamily C, 5 [Source:HGNC Symbol;Acc:HGNC:8718]	PCDHGC5	9.39634	6.55088	11.0529	16.8908	12.0588	18.2565
ENSG00000143257	0.815567	0.321063	6.38673	0.0114977	0.0357767	nuclear receptor subfamily 1 group I member 3 [Source:HGNC Symbol;Acc:HGNC:7969]	NR1I3	0.736968	1.0128	0.807126	1.97676	1.97967	0.829125
ENSG00000239887	0.815265	2.35657	13.7941	0.000203973	0.00127489	chromosome 1 open reading frame 226 [Source:HGNC Symbol;Acc:HGNC:34351]	C1orf226	3.71939	3.64177	3.62732	5.25733	7.78309	6.53035
ENSG00000124164	0.815173	5.44381	10.1368	0.00145337	0.00656619	VAMP associated protein B and C [Source:HGNC Symbol;Acc:HGNC:12649]	VAPB	34.3957	41.277	14.8416	103.397	38.4092	28.6719
ENSG00000124194	0.814606	1.85257	7.53274	0.00605875	0.021139	ganglioside induced differentiation associated protein 1 like 1 [Source:HGNC Symbol;Acc:HGNC:4213]	GDAP1L1	2.04969	2.27341	3.42791	6.19103	3.9955	3.5455
ENSG00000145934	0.814054	8.68874	33.8099	6.07675e-09	1.45778e-07	teneurin transmembrane protein 2 [Source:HGNC Symbol;Acc:HGNC:29943]	TENM2	276.824	269.588	350.302	539.924	437.444	601.566
ENSG00000237172	0.813806	4.20354	24.3969	7.8394e-07	1.07649e-05	UDP-GlcNAc:betaGal beta-1,3-N-acetylglucosaminyltransferase 9 [Source:HGNC Symbol;Acc:HGNC:28714]	B3GNT9	13.5418	13.8344	12.4962	20.9873	27.4623	22.0547
ENSG00000175467	0.813416	5.55186	26.4317	2.73023e-07	4.24364e-06	squamous cell carcinoma antigen recognized by T-cells 1 [Source:HGNC Symbol;Acc:HGNC:10538]	SART1	39.6466	30.6749	32.0951	58.9073	61.3246	58.6468
ENSG00000243156	0.813121	7.52969	33.4139	7.44883e-09	1.73499e-07	microtubule associated monooxygenase, calponin and LIM domain containing 3 [Source:HGNC Symbol;Acc:HGNC:24694]	MICAL3	131.802	121.59	148.027	245.185	201.628	260.274
ENSG00000120738	0.812599	5.80763	23.1934	1.465e-06	1.85733e-05	early growth response 1 [Source:HGNC Symbol;Acc:HGNC:3238]	EGR1	17.5836	71.4455	39.1314	39.2323	101.072	67.4355
ENSG00000142599	0.812159	7.19419	16.5866	4.64779e-05	0.000362967	arginine-glutamic acid dipeptide repeats [Source:HGNC Symbol;Acc:HGNC:9965]	RERE	101.045	120.577	88.7079	277.024	146.939	144.181
ENSG00000050767	0.812107	4.99053	26.1402	3.17508e-07	4.86431e-06	collagen type XXIII alpha 1 chain [Source:HGNC Symbol;Acc:HGNC:22990]	COL23A1	25.2296	22.6803	21.2322	39.6781	44.5471	37.208
ENSG00000139549	0.81132	-0.823822	5.47168	0.019327	0.0542324	desert hedgehog [Source:HGNC Symbol;Acc:HGNC:2865]	DHH	0.368484	0.323234	0.465284	0.496292	0.632772	0.939675
ENSG00000116786	0.810896	6.66728	31.8264	1.68587e-08	3.60715e-07	pleckstrin homology and RUN domain containing M2 [Source:HGNC Symbol;Acc:HGNC:29131]	PLEKHM2	81.6077	72.6846	66.868	135.269	140.683	112.54
ENSG00000109906	0.810882	7.99509	33.451	7.30829e-09	1.70474e-07	zinc finger and BTB domain containing 16 [Source:HGNC Symbol;Acc:HGNC:12930]	ZBTB16	277.434	229.022	60.0312	454.646	394.714	114.814
ENSG00000178764	0.810653	5.97514	29.709	5.0201e-08	9.65752e-07	zinc fingers and homeoboxes 2 [Source:HGNC Symbol;Acc:HGNC:18513]	ZHX2	48.4441	41.0723	47.2121	91.8645	71.7382	76.927
ENSG00000072071	0.810094	4.61121	23.8874	1.02139e-06	1.34825e-05	adhesion G protein-coupled receptor L1 [Source:HGNC Symbol;Acc:HGNC:20973]	ADGRL1	15.5339	20.4715	17.3864	31.7711	29.6589	31.641
ENSG00000134369	0.809972	7.51368	20.6664	5.46665e-06	5.81308e-05	neuron navigator 1 [Source:HGNC Symbol;Acc:HGNC:15989]	NAV1	77.8307	154.323	178.755	196.784	218.469	270.105
ENSG00000170604	0.809702	4.43724	21.9018	2.86969e-06	3.30365e-05	interferon regulatory factor 2 binding protein 1 [Source:HGNC Symbol;Acc:HGNC:21728]	IRF2BP1	16.6394	13.5974	16.9401	24.4697	30.129	28.0323
ENSG00000110400	0.809138	3.0296	18.0522	2.14929e-05	0.000187697	nectin cell adhesion molecule 1 [Source:HGNC Symbol;Acc:HGNC:9706]	NECTIN1	5.73453	5.37646	6.51398	12.4325	8.40682	10.3443
ENSG00000177303	0.808465	5.6352	27.6215	1.47529e-07	2.47815e-06	CASK interacting protein 2 [Source:HGNC Symbol;Acc:HGNC:18200]	CASKIN2	37.8272	27.8197	43.3569	60.4046	55.6749	72.9314
ENSG00000091527	0.808221	6.93712	17.6411	2.66758e-05	0.00022702	CDV3 homolog [Source:HGNC Symbol;Acc:HGNC:26928]	CDV3	65.7053	171.336	41.2774	173.088	217.095	66.6143
ENSG00000174945	0.807823	1.09503	10.0252	0.00154411	0.0069215	archaelysin family metallopeptidase 1 [Source:HGNC Symbol;Acc:HGNC:22231]	AMZ1	1.24363	1.81011	1.56677	2.54034	2.57628	2.90589
ENSG00000165474	0.807708	-1.60905	3.40709	0.0649167	0.140827	gap junction protein beta 2 [Source:HGNC Symbol;Acc:HGNC:4284]	GJB2	0.115151	0.355558	0.218399	0.328057	0.388703	0.418511
ENSG00000177103	0.807302	1.90205	10.4797	0.00120691	0.00560112	DS cell adhesion molecule like 1 [Source:HGNC Symbol;Acc:HGNC:14656]	DSCAML1	2.15333	2.89833	3.0291	5.18163	3.77855	5.19585
ENSG00000241978	0.807191	8.14098	14.4109	0.000146946	0.000963506	A-kinase anchoring protein 2 [Source:HGNC Symbol;Acc:HGNC:372]	AKAP2	112.768	304.088	226.983	340.111	399.279	310.274
ENSG00000143878	0.806581	8.15324	28.4721	9.50606e-08	1.6814e-06	ras homolog family member B [Source:HGNC Symbol;Acc:HGNC:668]	RHOB	280.923	185.299	160.447	412.73	392.951	275.625
ENSG00000175602	0.80611	5.06794	25.0772	5.50789e-07	7.82482e-06	coiled-coil domain containing 85B [Source:HGNC Symbol;Acc:HGNC:24926]	CCDC85B	26.2545	25.5786	21.0707	39.7538	51.4895	36.9474
ENSG00000036672	0.806055	5.68632	28.7889	8.07123e-08	1.45515e-06	ubiquitin specific peptidase 2 [Source:HGNC Symbol;Acc:HGNC:12618]	USP2	40.2223	34.4352	37.6216	72.3829	63.8738	60.2498
ENSG00000011332	0.805725	-2.21795	2.26992	0.131906	0.243553	double PHD fingers 1 [Source:HGNC Symbol;Acc:HGNC:20225]	DPF1	0.0690908	0.280136	0.104452	0.210293	0.22599	0.268479
ENSG00000178385	0.805692	4.90988	24.3227	8.14722e-07	1.10831e-05	pleckstrin homology domain containing M3 [Source:HGNC Symbol;Acc:HGNC:34006]	PLEKHM3	18.7006	23.0035	23.9764	36.9948	42.2782	35.2418
ENSG00000164591	0.805678	2.8916	7.20617	0.00726534	0.0244787	myozenin 3 [Source:HGNC Symbol;Acc:HGNC:18565]	MYOZ3	3.39696	6.92798	5.70685	12.912	9.09383	6.30925
ENSG00000135547	0.805652	4.98858	27.2448	1.79258e-07	2.93723e-06	hes related family bHLH transcription factor with YRPW motif 2 [Source:HGNC Symbol;Acc:HGNC:4881]	HEY2	26.0702	13.996	29.3509	45.5411	24.9312	50.395
ENSG00000126062	0.805577	4.78348	27.6678	1.44044e-07	2.43491e-06	transmembrane protein 115 [Source:HGNC Symbol;Acc:HGNC:30055]	TMEM115	19.6678	21.3873	18.9247	31.8132	39.2047	34.0731
ENSG00000214562	0.804455	3.21894	19.339	1.09447e-05	0.000105911	NUT family member 2D [Source:HGNC Symbol;Acc:HGNC:23447]	NUTM2D	6.4715	6.52933	7.17867	13.9298	10.3142	11.2603
ENSG00000122367	0.804418	9.74171	34.9937	3.30767e-09	8.41355e-08	LIM domain binding 3 [Source:HGNC Symbol;Acc:HGNC:15710]	LDB3	774.438	543.928	535.447	1482.26	900.018	900.619
ENSG00000111291	0.803888	-0.730474	5.43538	0.0197328	0.0551768	G protein-coupled receptor class C group 5 member D [Source:HGNC Symbol;Acc:HGNC:13310]	GPRC5D	0.333939	0.31246	0.617214	0.799114	0.497178	0.8844
ENSG00000163630	0.80377	-3.20126	1.67656	0.195382	0.326112	synaptoporin [Source:HGNC Symbol;Acc:HGNC:16507]	SYNPR	0.0806059	0.0538724	0.0569736	0.0841173	0.144634	0.11055
ENSG00000171056	0.803391	3.22	20.5208	5.89859e-06	6.20242e-05	SRY-box 7 [Source:HGNC Symbol;Acc:HGNC:18196]	SOX7	6.64423	5.75357	7.71043	12.3064	8.69609	14.6005
ENSG00000112033	0.80334	3.87448	16.5486	4.74187e-05	0.000369593	peroxisome proliferator activated receptor delta [Source:HGNC Symbol;Acc:HGNC:9235]	PPARD	7.91089	11.3132	12.8475	19.2376	14.4453	22.0468
ENSG00000130377	0.803229	-2.38904	2.04257	0.152951	0.271884	acyl-CoA synthetase bubblegum family member 2 [Source:HGNC Symbol;Acc:HGNC:24174]	ACSBG2	0.0230303	0.140068	0.23739	0.159823	0.189831	0.252686
ENSG00000169992	0.803113	2.89451	11.8958	0.000562592	0.00297315	neuroligin 2 [Source:HGNC Symbol;Acc:HGNC:14290]	NLGN2	3.39696	7.21889	5.97273	8.68091	8.3797	10.7786
ENSG00000158480	0.802176	2.78472	16.4057	5.11307e-05	0.000394687	spermatogenesis associated 2 [Source:HGNC Symbol;Acc:HGNC:14681]	SPATA2	4.73272	4.75154	5.48846	9.94267	7.85541	8.3939
ENSG00000173338	0.802133	-0.427823	6.19169	0.0128351	0.0390958	potassium two pore domain channel subfamily K member 7 [Source:HGNC Symbol;Acc:HGNC:6282]	KCNK7	0.333939	0.549498	0.674187	0.698174	0.732207	1.29501
ENSG00000179348	0.801709	4.2055	18.2332	1.95447e-05	0.000173328	GATA binding protein 2 [Source:HGNC Symbol;Acc:HGNC:4171]	GATA2	20.6927	6.65862	14.2054	26.1352	13.6227	29.201
ENSG00000158246	0.801391	5.14383	24.2152	8.61491e-07	1.15914e-05	family with sequence similarity 46 member B [Source:HGNC Symbol;Acc:HGNC:28273]	FAM46B	33.866	25.2554	17.9277	52.9014	53.1619	28.8693
ENSG00000168077	0.801292	3.81593	22.9143	1.69387e-06	2.10022e-05	scavenger receptor class A member 3 [Source:HGNC Symbol;Acc:HGNC:19000]	SCARA3	3.63878	16.7651	10.9579	6.89762	26.7753	19.291
ENSG00000198853	0.801276	5.76129	28.6666	8.59728e-08	1.53763e-06	RUN and SH3 domain containing 2 [Source:HGNC Symbol;Acc:HGNC:23625]	RUSC2	42.7326	40.4581	35.5325	71.5502	70.997	64.0006
ENSG00000168386	0.800909	5.8718	14.8454	0.000116691	0.000792697	filamin A interacting protein 1 like [Source:HGNC Symbol;Acc:HGNC:24589]	FILIP1L	23.1569	66.0798	38.3052	59.8242	121.076	42.7513
ENSG00000151746	0.80088	4.18679	13.3974	0.000251976	0.00151693	BICD cargo adaptor 1 [Source:HGNC Symbol;Acc:HGNC:1049]	BICD1	6.88605	27.4103	9.37215	15.3009	29.1798	20.9729
ENSG00000089558	0.799903	-0.718186	5.03096	0.0248981	0.0660836	potassium voltage-gated channel subfamily H member 4 [Source:HGNC Symbol;Acc:HGNC:6253]	KCNH4	0.42606	0.0969702	0.788135	0.614056	0.262148	1.27133
ENSG00000170577	0.799722	-0.353638	5.90918	0.0150622	0.0445499	SIX homeobox 2 [Source:HGNC Symbol;Acc:HGNC:10888]	SIX2	0.195757	0.861958	0.636205	0.479469	1.52769	0.844918
ENSG00000253485	0.79952	5.06642	26.9276	2.11217e-07	3.41303e-06	protocadherin gamma subfamily A, 5 [Source:HGNC Symbol;Acc:HGNC:8703]	PCDHGA5	26.0933	21.689	25.6001	43.0765	39.4759	44.9307
ENSG00000169083	0.799047	5.42296	22.9574	1.65628e-06	2.06551e-05	androgen receptor [Source:HGNC Symbol;Acc:HGNC:644]	AR	28.6381	20.0405	44.7812	63.7441	30.6442	69.3464
ENSG00000183655	0.798977	3.28772	19.8076	8.56413e-06	8.63146e-05	kelch like family member 25 [Source:HGNC Symbol;Acc:HGNC:25732]	KLHL25	7.72665	8.41486	5.32703	11.583	14.5447	10.8418
ENSG00000167394	0.798788	2.02951	12.3866	0.000432427	0.00237642	zinc finger protein 668 [Source:HGNC Symbol;Acc:HGNC:25821]	ZNF668	2.38363	3.44783	2.95313	4.09651	6.99665	4.45359
ENSG00000165799	0.798543	-2.56484	2.32781	0.127081	0.237295	ribonuclease A family member 7 [Source:HGNC Symbol;Acc:HGNC:19278]	RNASE7	0.103636	0.161617	0.0664692	0.159823	0.207911	0.189514
ENSG00000250091	0.797081	1.59821	10.4764	0.0012091	0.00560479	dynein axonemal heavy chain 10 opposite strand [Source:HGNC Symbol;Acc:HGNC:37121]	DNAH10OS	1.93454	2.19799	2.39289	3.98716	2.97403	4.49307
ENSG00000131196	0.796978	3.58986	23.2892	1.39378e-06	1.77546e-05	nuclear factor of activated T-cells 1 [Source:HGNC Symbol;Acc:HGNC:7775]	NFATC1	8.33695	7.61755	10.4262	15.2841	13.3424	17.0484
ENSG00000158445	0.796756	4.22302	22.9866	1.63133e-06	2.04075e-05	potassium voltage-gated channel subfamily B member 1 [Source:HGNC Symbol;Acc:HGNC:6231]	KCNB1	16.5933	17.0883	7.52051	31.1234	25.4374	14.1425
ENSG00000106665	0.796371	3.8523	21.9458	2.80458e-06	3.23567e-05	CAP-Gly domain containing linker protein 2 [Source:HGNC Symbol;Acc:HGNC:2586]	CLIP2	10.1909	9.12598	12.1449	15.0654	17.4283	22.5127
ENSG00000179776	0.79554	6.91573	27.6413	1.46024e-07	2.45803e-06	cadherin 5 [Source:HGNC Symbol;Acc:HGNC:1764]	CDH5	79.7422	80.4206	100.767	129.263	125.144	208.884
ENSG00000181830	0.79531	3.14494	18.9526	1.34004e-05	0.000125287	solute carrier family 35 member C1 [Source:HGNC Symbol;Acc:HGNC:20197]	SLC35C1	5.44665	8.22092	5.8303	11.0698	12.2215	10.1153
ENSG00000140274	0.795297	-2.71808	2.07566	0.149665	0.267557	dual oxidase maturation factor 2 [Source:HGNC Symbol;Acc:HGNC:32698]	DUOXA2	0.0690908	0.161617	0.0664692	0.159823	0.171752	0.157929
ENSG00000081853	0.795202	4.85259	22.4679	2.13687e-06	2.55357e-05	protocadherin gamma subfamily A, 2 [Source:HGNC Symbol;Acc:HGNC:8700]	PCDHGA2	15.9484	23.7362	24.2802	34.7657	36.99	37.4449
ENSG00000049618	0.794922	6.78537	28.1835	1.10339e-07	1.91985e-06	AT-rich interaction domain 1B [Source:HGNC Symbol;Acc:HGNC:18040]	ARID1B	71.2441	91.0227	80.3802	143.487	138.568	136.956
ENSG00000183801	0.794851	2.88719	13.3103	0.000263959	0.00157657	olfactomedin like 1 [Source:HGNC Symbol;Acc:HGNC:24473]	OLFML1	2.25696	9.61083	5.34602	5.36668	12.1763	9.46782
ENSG00000184956	0.794719	2.02061	11.1986	0.0008186	0.0040752	mucin 6, oligomeric mucus/gel-forming [Source:HGNC Symbol;Acc:HGNC:7517]	MUC6	1.76181	5.33336	2.13651	3.26375	7.1684	4.53255
ENSG00000130202	0.794545	5.01465	26.5285	2.59682e-07	4.06387e-06	nectin cell adhesion molecule 2 [Source:HGNC Symbol;Acc:HGNC:9707]	NECTIN2	19.8981	25.7187	25.2108	34.16	44.4115	44.3779
ENSG00000275183	0.794365	1.72732	11.0385	0.000892375	0.00438122	leukocyte receptor cluster member 9 [Source:HGNC Symbol;Acc:HGNC:16306]	LENG9	1.95757	2.85523	2.31693	2.84316	4.93562	4.78524
ENSG00000130723	0.793965	7.41182	32.4876	1.19957e-08	2.62971e-07	proline rich coiled-coil 2B [Source:HGNC Symbol;Acc:HGNC:28121]	PRRC2B	129.326	116.731	127.545	224.761	200.733	222.442
ENSG00000151929	0.793445	7.02291	26.5405	2.58069e-07	4.05049e-06	BCL2 associated athanogene 3 [Source:HGNC Symbol;Acc:HGNC:939]	BAG3	109.313	93.1345	80.6081	177.95	197.515	121.613
ENSG00000047662	0.793346	-1.32741	4.3382	0.0372663	0.0911048	family with sequence similarity 184 member B [Source:HGNC Symbol;Acc:HGNC:29235]	FAM184B	0.345454	0.215489	0.256381	0.546762	0.325425	0.55275
ENSG00000164393	0.793145	1.14628	10.4781	0.00120797	0.0056012	adhesion G protein-coupled receptor F2 [Source:HGNC Symbol;Acc:HGNC:18991]	ADGRF2	1.99212	1.33603	1.46232	3.5161	2.25086	2.55844
ENSG00000076356	0.793133	6.32544	31.0017	2.57798e-08	5.2694e-07	plexin A2 [Source:HGNC Symbol;Acc:HGNC:9100]	PLXNA2	42.6405	71.4778	63.0128	79.3058	113.131	111.419
ENSG00000165821	0.792756	2.43503	13.8102	0.000202236	0.00126793	spalt like transcription factor 2 [Source:HGNC Symbol;Acc:HGNC:10526]	SALL2	2.7406	4.66535	4.55789	5.84615	7.15032	7.3042
ENSG00000116871	0.792381	7.63519	28.8293	7.90458e-08	1.42969e-06	MAP7 domain containing 1 [Source:HGNC Symbol;Acc:HGNC:25514]	MAP7D1	179.958	119.963	139.87	274.912	244.123	233.821
ENSG00000186510	0.791815	-1.83074	1.9202	0.165835	0.288796	chloride voltage-gated channel Ka [Source:HGNC Symbol;Acc:HGNC:2026]	CLCNKA	0.0690908	0.215489	0.246886	0.302822	0.108475	0.576439
ENSG00000171223	0.791579	6.50256	27.6617	1.44496e-07	2.43998e-06	JunB proto-oncogene, AP-1 transcription factor subunit [Source:HGNC Symbol;Acc:HGNC:6205]	JUNB	38.4835	72.0489	84.055	56.2577	145.076	147.9
ENSG00000143842	0.791319	4.28253	22.9644	1.65027e-06	2.05963e-05	SRY-box 13 [Source:HGNC Symbol;Acc:HGNC:11192]	SOX13	14.7509	13.0587	14.5947	25.1511	19.8148	29.2089
ENSG00000071655	0.7911	5.99353	27.5003	1.57072e-07	2.6165e-06	methyl-CpG binding domain protein 3 [Source:HGNC Symbol;Acc:HGNC:6918]	MBD3	46.5787	58.1929	35.2666	70.5828	104.118	67.3881
ENSG00000203942	0.791028	1.73758	10.3571	0.00128976	0.00592727	chromosome 10 open reading frame 62 [Source:HGNC Symbol;Acc:HGNC:23294]	C10orf62	3.30484	3.72797	0.607718	5.01339	5.8667	1.38188
ENSG00000198467	0.79092	8.81313	29.2291	6.43061e-08	1.19826e-06	tropomyosin 2 (beta) [Source:HGNC Symbol;Acc:HGNC:12011]	TPM2	405.747	309.421	280.149	580.014	600.229	523.059
ENSG00000168286	0.790195	4.82919	23.2802	1.40035e-06	1.78101e-05	THAP domain containing 11 [Source:HGNC Symbol;Acc:HGNC:23194]	THAP11	22.6503	19.2863	20.4535	33.6301	40.0544	34.3179
ENSG00000185585	0.78996	5.74877	24.6287	6.95084e-07	9.66064e-06	olfactomedin like 2A [Source:HGNC Symbol;Acc:HGNC:27270]	OLFML2A	25.103	31.7524	63.4781	52.3967	50.3325	99.345
ENSG00000205138	0.789657	2.78936	16.5515	4.73475e-05	0.000369218	succinate dehydrogenase complex assembly factor 1 [Source:HGNC Symbol;Acc:HGNC:33867]	SDHAF1	5.58484	4.23437	5.37451	8.57155	8.37067	9.16775
ENSG00000022556	0.78933	-1.6322	2.69437	0.100703	0.198813	NLR family pyrin domain containing 2 [Source:HGNC Symbol;Acc:HGNC:22948]	NLRP2	0.092121	0.560272	0.0569736	0.092529	0.804524	0.2211
ENSG00000105989	0.788209	-0.968194	4.91481	0.0266274	0.0696774	Wnt family member 2 [Source:HGNC Symbol;Acc:HGNC:12780]	WNT2	0.195757	0.549498	0.341842	0.378528	0.849722	0.608025
ENSG00000090565	0.788106	5.84289	28.4312	9.70903e-08	1.71351e-06	RAB11 family interacting protein 3 [Source:HGNC Symbol;Acc:HGNC:17224]	RAB11FIP3	42.6405	46.8905	36.8904	75.5205	76.6738	65.5956
ENSG00000134917	0.787806	1.31903	10.7624	0.00103583	0.00495646	ADAM metallopeptidase with thrombospondin type 1 motif 8 [Source:HGNC Symbol;Acc:HGNC:224]	ADAMTS8	1.31272	2.30574	1.81366	2.24593	3.88703	3.23754
ENSG00000151208	0.787732	5.69143	28.2911	1.04372e-07	1.82994e-06	discs large MAGUK scaffold protein 5 [Source:HGNC Symbol;Acc:HGNC:2904]	DLG5	34.1654	47.5154	31.9527	58.7643	82.3417	55.1566
ENSG00000167674	0.787206	5.1393	25.186	5.20579e-07	7.47517e-06	Hepatoma-derived growth factor-related protein 2 [Source:UniProtKB/Swiss-Prot;Acc:Q7Z4V5]		26.9339	24.7813	25.7616	41.8231	47.5483	44.4411
ENSG00000198720	0.787157	2.5626	13.0875	0.000297273	0.00173482	ankyrin repeat domain 13B [Source:HGNC Symbol;Acc:HGNC:26363]	ANKRD13B	3.07454	5.6566	4.40596	7.08268	8.28027	6.77514
ENSG00000074211	0.787091	1.39438	10.7047	0.00106865	0.00507864	protein phosphatase 2 regulatory subunit Bgamma [Source:HGNC Symbol;Acc:HGNC:9306]	PPP2R2C	2.09575	2.03637	1.60476	3.70957	3.02826	3.13488
ENSG00000166126	0.786857	-0.916064	4.15502	0.0415113	0.0990499	amnion associated transmembrane protein [Source:HGNC Symbol;Acc:HGNC:14604]	AMN	0.207272	0.560272	0.379824	0.571998	0.596613	0.710679
ENSG00000171357	0.786762	3.53621	22.5409	2.05717e-06	2.47308e-05	leucine rich adaptor protein 1 [Source:HGNC Symbol;Acc:HGNC:32327]	LURAP1	7.56544	9.92329	7.92882	12.3989	17.7176	13.9056
ENSG00000254402	0.786302	-1.34869	3.9016	0.04824	0.111591	leucine rich repeat containing 24 [Source:HGNC Symbol;Acc:HGNC:28947]	LRRC24	0.218787	0.301685	0.275372	0.38694	0.361584	0.655404
ENSG00000169047	0.786283	5.74721	26.8586	2.18899e-07	3.52194e-06	insulin receptor substrate 1 [Source:HGNC Symbol;Acc:HGNC:6125]	IRS1	40.5332	33.7672	44.259	66.7555	63.8195	72.963
ENSG00000197653	0.785529	0.119042	7.79385	0.00524243	0.0187606	dynein axonemal heavy chain 10 [Source:HGNC Symbol;Acc:HGNC:2941]	DNAH10	0.748483	0.689566	0.883091	1.144	1.23842	1.64246
ENSG00000187486	0.7855	4.45455	20.3664	6.39421e-06	6.6667e-05	potassium voltage-gated channel subfamily J member 11 [Source:HGNC Symbol;Acc:HGNC:6257]	KCNJ11	24.4812	10.9792	14.1484	33.2432	23.0058	25.5371
ENSG00000183647	0.785265	1.99044	9.14888	0.0024887	0.010226	zinc finger protein 530 [Source:HGNC Symbol;Acc:HGNC:29297]	ZNF530	2.38363	2.42426	3.99765	4.50869	5.78534	4.56414
ENSG00000136848	0.78515	6.23072	30.5043	3.33124e-08	6.64796e-07	DAB2 interacting protein [Source:HGNC Symbol;Acc:HGNC:17294]	DAB2IP	52.7623	51.836	60.0407	92.7646	80.5066	112.493
ENSG00000128245	0.785066	5.41264	22.0308	2.68311e-06	3.10792e-05	tyrosine 3-monooxygenase/tryptophan 5-monooxygenase activation protein eta [Source:HGNC Symbol;Acc:HGNC:12853]	YWHAH	28.926	30.4271	33.7284	45.8776	66.9472	49.4948
ENSG00000148840	0.784888	4.53544	25.2171	5.12249e-07	7.39531e-06	peroxisome proliferator-activated receptor gamma, coactivator-related 1 [Source:HGNC Symbol;Acc:HGNC:30025]	PPRC1	13.4957	17.8964	19.8363	24.9828	29.8216	32.9202
ENSG00000189431	0.784765	-0.687406	5.46143	0.0194407	0.0545313	Ras association domain family member 10 [Source:HGNC Symbol;Acc:HGNC:33984]	RASSF10	0.333939	0.290911	0.683683	0.48788	0.623732	1.12919
ENSG00000142235	0.784591	0.571747	7.14368	0.00752288	0.0252311	lemur tyrosine kinase 3 [Source:HGNC Symbol;Acc:HGNC:19295]	LMTK3	0.748483	1.6054	0.911577	1.98517	2.20566	1.31081
ENSG00000265690	0.784211	1.01496	7.21781	0.00721837	0.0243679			1.63515	0.808085	1.61425	3.54975	0.822603	3.49022
ENSG00000055813	0.784147	4.17355	22.2805	2.35585e-06	2.77388e-05	coiled-coil domain containing 85A [Source:HGNC Symbol;Acc:HGNC:29400]	CCDC85A	16.8351	11.1516	12.0499	24.9408	20.3843	22.7417
ENSG00000172935	0.784126	2.26401	11.904	0.000560134	0.0029634	MAS related GPR family member F [Source:HGNC Symbol;Acc:HGNC:24828]	MRGPRF	1.46242	3.69564	5.1846	2.18705	7.96388	8.12543
ENSG00000092054	0.78355	15.7814	46.4114	9.58555e-12	4.00022e-10	myosin heavy chain 7 [Source:HGNC Symbol;Acc:HGNC:7577]	MYH7	47642.7	39186.7	37385.1	81706.9	66364.5	65653.2
ENSG00000166341	0.78314	6.28696	30.6119	3.15147e-08	6.32861e-07	dachsous cadherin-related 1 [Source:HGNC Symbol;Acc:HGNC:13681]	DCHS1	46.3369	72.1674	54.4667	80.9545	112.227	102.18
ENSG00000261308	0.782426	-0.621965	5.63546	0.0176007	0.0505106	fidgetin like 2 [Source:HGNC Symbol;Acc:HGNC:13287]	FIGNL2	0.42606	0.560272	0.38932	0.597233	0.958197	0.821229
ENSG00000173898	0.782171	2.77246	16.6315	4.53911e-05	0.00035639	spectrin beta, non-erythrocytic 2 [Source:HGNC Symbol;Acc:HGNC:11276]	SPTBN2	3.5006	7.22967	4.37747	6.12374	11.7786	7.82536
ENSG00000172602	0.781916	-0.787488	3.64102	0.0563723	0.126098	Rho family GTPase 1 [Source:HGNC Symbol;Acc:HGNC:18314]	RND1	0.0575756	0.161617	1.09199	0.24394	0.198871	1.50822
ENSG00000109089	0.781798	4.45274	25.092	5.46583e-07	7.77886e-06	cerebellar degeneration related protein 2 like [Source:HGNC Symbol;Acc:HGNC:29999]	CDR2L	15.2345	16.8728	16.133	26.0427	29.46	27.4717
ENSG00000148156	0.781754	-3.02345	1.46344	0.226384	0.363926	actin like 7B [Source:HGNC Symbol;Acc:HGNC:162]	ACTL7B	0.0460605	0.0646468	0.0854604	0.0420587	0.0813564	0.276375
ENSG00000176125	0.781389	0.81336	7.84887	0.00508526	0.0183332	UFM1 specific peptidase 1 (inactive) [Source:HGNC Symbol;Acc:HGNC:33821]	UFSP1	1.50848	1.26061	1.05401	1.76646	2.48589	2.31365
ENSG00000168792	0.781386	3.35999	20.7834	5.14269e-06	5.49778e-05	abhydrolase domain containing 15 [Source:HGNC Symbol;Acc:HGNC:26971]	ABHD15	6.66726	8.87816	6.92229	10.7922	16.5244	11.6551
ENSG00000145945	0.781093	4.48855	24.3918	7.86042e-07	1.07753e-05	family with sequence similarity 50 member B [Source:HGNC Symbol;Acc:HGNC:18789]	FAM50B	17.3187	13.3711	18.7728	27.2624	23.8465	33.931
ENSG00000125851	0.781064	0.808412	7.25836	0.00705717	0.0238891	proprotein convertase subtilisin/kexin type 2 [Source:HGNC Symbol;Acc:HGNC:8744]	PCSK2	1.00182	0.549498	2.25995	2.64128	0.777405	3.06381
ENSG00000095539	0.780693	1.58443	9.77395	0.00177002	0.00774988	semaphorin 4G [Source:HGNC Symbol;Acc:HGNC:10735]	SEMA4G	1.35878	2.4458	2.82969	3.01981	3.29041	4.8563
ENSG00000047849	0.780491	10.9529	33.2402	8.14479e-09	1.86724e-07	microtubule associated protein 4 [Source:HGNC Symbol;Acc:HGNC:6862]	MAP4	1413.15	1872.48	1062.55	2762.55	3139.42	1643.15
ENSG00000054793	0.780367	6.01269	5.01789	0.0250867	0.0664706	ATPase phospholipid transporting 9A (putative) [Source:HGNC Symbol;Acc:HGNC:13540]	ATP9A	33.0714	38.1955	72.5179	103.574	96.0095	43.841
ENSG00000205903	0.779473	5.33602	25.2781	4.96319e-07	7.19145e-06	zinc finger protein 316 [Source:HGNC Symbol;Acc:HGNC:13843]	ZNF316	29.9854	28.5631	30.5378	47.072	52.7189	53.3009
ENSG00000143507	0.779322	2.13551	12.6265	0.000380312	0.00212825	dual specificity phosphatase 10 [Source:HGNC Symbol;Acc:HGNC:3065]	DUSP10	2.83272	2.55355	4.3205	5.20686	4.52884	6.72776
ENSG00000127124	0.779299	3.14362	10.5303	0.00117434	0.0054714	human immunodeficiency virus type I enhancer binding protein 3 [Source:HGNC Symbol;Acc:HGNC:13561]	HIVEP3	4.04181	7.99466	7.81488	11.768	12.1944	9.03352
ENSG00000188486	0.779033	2.70268	14.5004	0.000140127	0.000925948	H2A histone family member X [Source:HGNC Symbol;Acc:HGNC:4739]	H2AFX	4.92847	5.064	4.16857	7.19203	10.7752	6.77514
ENSG00000171847	0.779024	0.0627783	6.24159	0.0124784	0.0382565	family with sequence similarity 90 member A1 [Source:HGNC Symbol;Acc:HGNC:25526]	FAM90A1	0.541211	0.732664	0.968551	1.42999	0.931078	1.48453
ENSG00000135439	0.778922	4.69296	25.2122	5.13573e-07	7.40108e-06	ArfGAP with GTPase domain, ankyrin repeat and PH domain 2 [Source:HGNC Symbol;Acc:HGNC:16921]	AGAP2	22.6618	11.5287	22.9604	37.6341	20.0589	40.1533
ENSG00000196872	0.778898	3.2574	17.7217	2.55699e-05	0.000218771	KIAA1211 like [Source:HGNC Symbol;Acc:HGNC:33454]	KIAA1211L	8.67089	8.16705	4.32999	12.0961	15.9187	8.05436
ENSG00000178342	0.778836	-0.194231	6.8697	0.00876693	0.0286247	potassium voltage-gated channel modifier subfamily G member 2 [Source:HGNC Symbol;Acc:HGNC:6249]	KCNG2	0.518181	0.527949	0.816621	0.92529	0.858762	1.42136
ENSG00000143850	0.77876	5.7492	26.5038	2.63015e-07	4.11202e-06	pleckstrin homology domain containing A6 [Source:HGNC Symbol;Acc:HGNC:17053]	PLEKHA6	37.8157	40.3396	40.5272	67.7228	72.9043	63.2425
ENSG00000228253	0.778438	7.42359	26.8131	2.24108e-07	3.59493e-06	mitochondrially encoded ATP synthase 8 [Source:HGNC Symbol;Acc:HGNC:7415]	MT-ATP8	150.33	111.904	110.082	310.494	169.411	177.693
ENSG00000177873	0.777783	2.86321	11.8824	0.000566668	0.00298811	zinc finger protein 619 [Source:HGNC Symbol;Acc:HGNC:26910]	ZNF619	7.02423	4.91316	4.28251	8.05003	9.63621	9.59416
ENSG00000172780	0.777671	3.37417	5.34056	0.0208347	0.0573882	RAB43, member RAS oncogene family [Source:HGNC Symbol;Acc:HGNC:19983]	RAB43	9.33877	11.4317	3.39942	10.5567	11.9413	15.398
ENSG00000136213	0.777663	4.66173	15.7923	7.06881e-05	0.000519861	carbohydrate sulfotransferase 12 [Source:HGNC Symbol;Acc:HGNC:17423]	CHST12	12.7818	25.4601	18.2221	32.259	39.268	23.713
ENSG00000111181	0.777072	0.332142	6.88755	0.00867982	0.0283866	solute carrier family 6 member 12 [Source:HGNC Symbol;Acc:HGNC:11045]	SLC6A12	1.01333	0.689566	0.911577	2.48987	0.967237	1.31081
ENSG00000168490	0.776712	3.2129	17.5153	2.85e-05	0.000239275	phytanoyl-CoA 2-hydroxylase interacting protein [Source:HGNC Symbol;Acc:HGNC:16865]	PHYHIP	2.17636	14.19	4.70982	4.62645	22.6894	7.10679
ENSG00000187642	0.776154	7.09584	19.1974	1.17877e-05	0.000112439	PPARGC1 and ESRR induced regulator, muscle 1 [Source:HGNC Symbol;Acc:HGNC:28208]	PERM1	109.267	56.1458	146.982	150.292	136.769	221.1
ENSG00000196456	0.775482	2.82656	14.7899	0.000120178	0.000813285	zinc finger protein 775 [Source:HGNC Symbol;Acc:HGNC:28501]	ZNF775	5.4812	5.03168	5.00418	8.62202	7.37631	10.8655
ENSG00000113262	0.774484	0.207778	7.77215	0.00530578	0.0189466	glutamate metabotropic receptor 6 [Source:HGNC Symbol;Acc:HGNC:4598]	GRM6	0.794544	0.969702	0.721665	1.52252	1.6904	1.08181
ENSG00000179862	0.773478	3.22016	15.7734	7.13995e-05	0.000524371	Cbp/p300 interacting transactivator with Glu/Asp rich carboxy-terminal domain 4 [Source:HGNC Symbol;Acc:HGNC:18696]	CITED4	8.27938	6.0768	6.30508	10.4558	11.8599	12.7685
ENSG00000177272	0.773337	0.425067	7.51739	0.00611062	0.0212783	potassium voltage-gated channel subfamily A member 3 [Source:HGNC Symbol;Acc:HGNC:6221]	KCNA3	0.368484	1.13132	1.31989	0.504704	2.16046	2.38472
ENSG00000137825	0.773161	1.05027	9.34756	0.00223283	0.00936432	inositol-trisphosphate 3-kinase A [Source:HGNC Symbol;Acc:HGNC:6178]	ITPKA	2.70605	1.19597	0.721665	4.13016	2.31414	1.23184
ENSG00000160838	0.773104	-1.42573	2.57243	0.10874	0.210607	leucine rich repeat containing 71 [Source:HGNC Symbol;Acc:HGNC:26556]	LRRC71	0.241818	0.31246	0.180416	0.698174	0.207911	0.4422
ENSG00000204922	0.772574	3.2415	17.6894	2.60078e-05	0.000221688	ubiquinol-cytochrome c reductase complex assembly factor 3 [Source:HGNC Symbol;Acc:HGNC:34399]	UQCC3	6.88605	6.36771	7.49203	9.77443	11.4893	14.5531
ENSG00000090975	0.771976	4.72053	21.2759	3.977e-06	4.38619e-05	phosphatidylinositol transfer protein membrane associated 2 [Source:HGNC Symbol;Acc:HGNC:21044]	PITPNM2	18.3321	19.06	20.6244	37.8023	26.8928	35.2891
ENSG00000254221	0.771779	4.89486	23.8539	1.03933e-06	1.36855e-05	protocadherin gamma subfamily B, 1 [Source:HGNC Symbol;Acc:HGNC:8708]	PCDHGB1	22.9727	18.6829	24.4132	36.448	35.6702	40.1376
ENSG00000080709	0.771615	2.7734	15.4886	8.30064e-05	0.00059569	potassium calcium-activated channel subfamily N member 2 [Source:HGNC Symbol;Acc:HGNC:6291]	KCNN2	5.05514	2.98453	7.31161	8.86596	5.74014	10.8655
ENSG00000196724	0.771464	3.23354	13.8995	0.000192848	0.00121861	zinc finger protein 418 [Source:HGNC Symbol;Acc:HGNC:20647]	ZNF418	7.42726	6.00138	6.9128	9.84172	9.24751	16.8115
ENSG00000258429	0.770215	2.21642	9.69949	0.0018432	0.00800033	peptide deformylase (mitochondrial) [Source:HGNC Symbol;Acc:HGNC:30012]	PDF	3.17817	2.67207	4.5199	5.63586	6.3006	5.40116
ENSG00000178597	0.770208	-0.718944	5.02842	0.0249346	0.066166	prosaposin-like 1 (gene/pseudogene) [Source:HGNC Symbol;Acc:HGNC:33131]	PSAPL1	0.310908	0.668017	0.275372	0.580409	1.32882	0.355339
ENSG00000115107	0.77012	2.6579	15.2659	9.33877e-05	0.000658108	STEAP3 metalloreductase [Source:HGNC Symbol;Acc:HGNC:24592]	STEAP3	4.58302	4.18049	5.10863	8.19303	6.47235	9.14407
ENSG00000259316	0.76983	-0.48911	5.91398	0.0150212	0.044437			0.44909	0.614145	0.455789	0.908467	1.03955	0.6633
ENSG00000099974	0.769015	3.34479	7.62794	0.00574708	0.0202366	D-dopachrome tautomerase-like [Source:HGNC Symbol;Acc:HGNC:33446]	DDTL	3.47757	8.53338	11.822	12.5082	9.98875	14.4268
ENSG00000184838	0.768792	2.90033	14.5627	0.000135569	0.000900329	proline rich 16 [Source:HGNC Symbol;Acc:HGNC:29654]	PRR16	7.25453	4.67612	4.70982	10.2034	10.1153	7.68323
ENSG00000259956	0.768612	5.91981	26.5315	2.59281e-07	4.06156e-06	RNA binding motif protein 15B [Source:HGNC Symbol;Acc:HGNC:24303]	RBM15B	41.0514	48.6036	44.2305	66.1835	88.5338	74.4633
ENSG00000179041	0.768604	3.91003	20.7995	5.0995e-06	5.45888e-05	ribosome biogenesis regulator homolog [Source:HGNC Symbol;Acc:HGNC:17083]	RRS1	12.0218	11.5179	9.77097	17.7824	21.1888	17.7512
ENSG00000198113	0.768425	4.56987	23.1785	1.47638e-06	1.86879e-05	torsin family 4 member A [Source:HGNC Symbol;Acc:HGNC:25981]	TOR4A	17.8024	15.4721	19.466	27.8176	30.2736	31.491
ENSG00000127903	0.768342	2.45684	13.0975	0.000295687	0.00172745	zinc finger protein 835 [Source:HGNC Symbol;Acc:HGNC:34332]	ZNF835	4.84787	3.02763	4.19705	7.05744	4.98082	8.64659
ENSG00000248643	0.768338	3.7353	16.1396	5.8841e-05	0.000443313	RBM14-RBM4 readthrough [Source:HGNC Symbol;Acc:HGNC:38840]	RBM14-RBM4	7.79574	11.8196	10.0368	16.63	14.5447	18.8962
ENSG00000175040	0.768056	2.35663	13.2847	0.000267578	0.00159285	carbohydrate sulfotransferase 2 [Source:HGNC Symbol;Acc:HGNC:1970]	CHST2	2.91333	3.82494	4.44394	4.60963	6.14692	8.59921
ENSG00000167670	0.767631	3.02931	18.3247	1.86275e-05	0.000166113	chromatin assembly factor 1 subunit A [Source:HGNC Symbol;Acc:HGNC:1910]	CHAF1A	5.88423	5.73202	6.44751	9.85014	10.052	10.8418
ENSG00000176842	0.767554	3.18357	18.4104	1.78087e-05	0.000160149	iroquois homeobox 5 [Source:HGNC Symbol;Acc:HGNC:14361]	IRX5	5.17029	7.14347	7.58698	7.73879	13.4961	13.1949
ENSG00000137834	0.767302	5.52877	25.6098	4.17909e-07	6.24137e-06	SMAD family member 6 [Source:HGNC Symbol;Acc:HGNC:6772]	SMAD6	35.2363	28.2399	39.2548	54.8277	53.2161	66.0378
ENSG00000198695	0.766752	8.39275	17.2459	3.28399e-05	0.000269946	mitochondrially encoded NADH:ubiquinone oxidoreductase core subunit 6 [Source:HGNC Symbol;Acc:HGNC:7462]	MT-ND6	304.022	200.955	202.389	706.249	231.911	370.887
ENSG00000163083	0.766741	1.80018	11.2175	0.000810312	0.00403911	inhibin beta B subunit [Source:HGNC Symbol;Acc:HGNC:6067]	INHBB	2.68302	2.82291	2.165	4.13857	5.11641	3.81398
ENSG00000162413	0.766683	6.84049	26.8027	2.25326e-07	3.61085e-06	kelch like family member 21 [Source:HGNC Symbol;Acc:HGNC:29041]	KLHL21	105.386	52.3316	100.653	160.092	102.925	166.038
ENSG00000149527	0.76649	1.00828	8.2012	0.00418626	0.0157439	phospholipase C eta 2 [Source:HGNC Symbol;Acc:HGNC:29037]	PLCH2	0.702423	1.84243	1.97508	1.61505	2.42261	3.3244
ENSG00000254122	0.766387	5.35215	24.7863	6.4052e-07	8.98803e-06	protocadherin gamma subfamily B, 7 [Source:HGNC Symbol;Acc:HGNC:8714]	PCDHGB7	29.5824	29.619	31.326	52.1948	46.3731	55.8041
ENSG00000183337	0.766325	5.20816	23.4507	1.28157e-06	1.64824e-05	BCL6 corepressor [Source:HGNC Symbol;Acc:HGNC:20893]	BCOR	21.8442	28.283	32.5034	42.6811	47.3223	48.9816
ENSG00000276045	0.765868	2.37356	13.5893	0.000227477	0.00139828	ORAI calcium release-activated calcium modulator 1 [Source:HGNC Symbol;Acc:HGNC:25896]	ORAI1	2.68302	3.99733	4.83326	4.91245	6.65314	7.82536
ENSG00000177669	0.765804	-0.903669	4.69402	0.0302677	0.0771374	membrane bound O-acyltransferase domain containing 4 [Source:HGNC Symbol;Acc:HGNC:32311]	MBOAT4	0.299393	0.280136	0.522258	0.538351	0.388703	1.00285
ENSG00000100154	0.765604	6.50717	28.0432	1.18638e-07	2.04665e-06	tetratricopeptide repeat domain 28 [Source:HGNC Symbol;Acc:HGNC:29179]	TTC28	58.0708	76.8758	67.6941	111.598	124.005	107.344
ENSG00000084731	0.76467	2.33279	13.2504	0.000272524	0.0016139	kinesin family member 3C [Source:HGNC Symbol;Acc:HGNC:6321]	KIF3C	3.09757	3.46938	4.60536	5.54333	5.95709	7.36737
ENSG00000075275	0.764452	5.20062	19.7252	8.94123e-06	8.96641e-05	cadherin EGF LAG seven-pass G-type receptor 1 [Source:HGNC Symbol;Acc:HGNC:1850]	CELSR1	22.8921	24.9752	34.6589	46.0374	46.6262	45.2702
ENSG00000137497	0.76409	7.58217	19.5921	9.58643e-06	9.48873e-05	nuclear mitotic apparatus protein 1 [Source:HGNC Symbol;Acc:HGNC:8059]	NUMA1	151.309	143.828	127.241	228.707	197.253	301.249
ENSG00000101280	0.764032	-1.3518	3.88546	0.048706	0.112466	angiopoietin 4 [Source:HGNC Symbol;Acc:HGNC:487]	ANGPT4	0.44909	0.247813	0.132938	0.765467	0.352544	0.276375
ENSG00000171169	0.763603	2.40542	12.8741	0.000333159	0.00189996	nuclear apoptosis inducing factor 1 [Source:HGNC Symbol;Acc:HGNC:25446]	NAIF1	3.81151	3.64177	4.21605	5.44239	7.20456	7.2963
ENSG00000197077	0.763531	5.45749	25.1234	5.3776e-07	7.68742e-06	KIAA1671 [Source:HGNC Symbol;Acc:HGNC:29345]	KIAA1671	27.8436	31.3214	38.9699	51.7994	53.6138	59.9102
ENSG00000141448	0.763474	6.98859	26.8914	2.15217e-07	3.46967e-06	GATA binding protein 6 [Source:HGNC Symbol;Acc:HGNC:4174]	GATA6	88.7125	92.5635	100.767	147.836	178.342	153.554
ENSG00000096070	0.762593	4.58844	15.6894	7.46417e-05	0.000544687	bromodomain and PHD finger containing 3 [Source:HGNC Symbol;Acc:HGNC:14256]	BRPF3	15.1424	20.1052	17.7378	37.0789	31.3855	22.7259
ENSG00000270170	0.761857	3.52781	19.095	1.24368e-05	0.000117398	NCBP2 antisense RNA 2 (head to head) [Source:HGNC Symbol;Acc:HGNC:25121]	NCBP2-AS2	10.2139	6.57243	9.02082	14.4093	12.9085	15.9034
ENSG00000157782	0.761767	3.10702	18.6464	1.57346e-05	0.000144497	calcium binding protein 1 [Source:HGNC Symbol;Acc:HGNC:1384]	CABP1	8.61331	4.14817	6.21012	14.9897	6.51755	11.0392
ENSG00000148396	0.761089	6.23383	25.1594	5.27824e-07	7.55888e-06	SEC16 homolog A, endoplasmic reticulum export factor [Source:HGNC Symbol;Acc:HGNC:29006]	SEC16A	46.3484	59.766	62.1012	96.533	88.2897	98.3421
ENSG00000198077	0.760095	-1.2894	2.26133	0.13264	0.244627	cytochrome P450 family 2 subfamily A member 7 [Source:HGNC Symbol;Acc:HGNC:2611]	CYP2A7	0.0460605	0.549498	0.370328	0.269175	0.388703	0.679093
ENSG00000136928	0.759943	-0.516689	5.49032	0.019122	0.0537924	gamma-aminobutyric acid type B receptor subunit 2 [Source:HGNC Symbol;Acc:HGNC:4507]	GABBR2	0.771513	0.172392	0.569736	1.26176	0.325425	0.931779
ENSG00000119703	0.759565	2.56226	9.69971	0.00184297	0.00800033	zinc finger C2HC-type containing 1C [Source:HGNC Symbol;Acc:HGNC:20354]	ZC2HC1C	5.19332	2.29496	6.19113	7.61262	6.165	7.80167
ENSG00000179912	0.759537	5.85011	21.8973	2.8764e-06	3.309e-05	R3H domain containing 2 [Source:HGNC Symbol;Acc:HGNC:29167]	R3HDM2	35.7429	44.5093	48.3611	74.0821	62.2919	80.9305
ENSG00000127616	0.759018	5.9489	25.7544	3.87749e-07	5.84725e-06	SWI/SNF related, matrix associated, actin dependent regulator of chromatin, subfamily a, member 4 [Source:HGNC Symbol;Acc:HGNC:11100]	SMARCA4	43.6423	46.3949	47.4495	79.1712	71.241	82.5572
ENSG00000196358	0.758833	3.08621	17.5431	2.80875e-05	0.000236522	netrin G2 [Source:HGNC Symbol;Acc:HGNC:14288]	NTNG2	4.73272	9.82632	3.82673	7.20885	18.947	6.27766
ENSG00000167680	0.757298	3.66169	21.7265	3.14416e-06	3.57849e-05	semaphorin 6B [Source:HGNC Symbol;Acc:HGNC:10739]	SEMA6B	7.59998	6.14145	14.1674	12.6597	10.0249	25.1185
ENSG00000159733	0.756833	2.94655	16.2882	5.44018e-05	0.000416327	zinc finger FYVE-type containing 28 [Source:HGNC Symbol;Acc:HGNC:29334]	ZFYVE28	5.79211	4.81619	6.37155	10.3969	7.09608	11.592
ENSG00000131759	0.756829	3.48882	19.6964	9.07717e-06	9.06303e-05	retinoic acid receptor alpha [Source:HGNC Symbol;Acc:HGNC:9864]	RARA	6.6212	9.29837	8.97334	11.0362	13.9662	17.2774
ENSG00000179270	0.755712	1.46155	7.88733	0.00497822	0.0180489	chromosome 2 open reading frame 71 [Source:HGNC Symbol;Acc:HGNC:34383]	C2orf71	2.70605	0.861958	2.01307	6.17421	0.949157	3.62446
ENSG00000120451	0.755173	6.75239	24.8882	6.07526e-07	8.53252e-06	sorting nexin 19 [Source:HGNC Symbol;Acc:HGNC:21532]	SNX19	105.409	69.2583	68.6627	148.518	130.857	124.013
ENSG00000100024	0.754325	1.94591	9.17205	0.00245739	0.0101155	beta-ureidopropionase 1 [Source:HGNC Symbol;Acc:HGNC:16297]	UPB1	2.55636	1.0559	5.02317	5.88821	1.64521	6.72776
ENSG00000168061	0.754114	1.79243	10.9985	0.000911859	0.0044564	SAC3 domain containing 1 [Source:HGNC Symbol;Acc:HGNC:30179]	SAC3D1	2.48727	2.26264	2.93414	4.07128	4.12206	4.72996
ENSG00000197136	0.752912	5.03985	22.8042	1.79371e-06	2.19922e-05	pecanex homolog 3 (Drosophila) [Source:HGNC Symbol;Acc:HGNC:18760]	PCNX3	20.1745	27.0547	26.5402	38.2818	42.7121	42.4354
ENSG00000176788	0.752828	1.7079	8.31986	0.0039214	0.0149088	brain abundant membrane attached signal protein 1 [Source:HGNC Symbol;Acc:HGNC:957]	BASP1	1.41636	2.63975	2.79171	1.61505	5.68591	5.26692
ENSG00000160299	0.75246	7.20998	29.2109	6.49122e-08	1.20815e-06	pericentrin [Source:HGNC Symbol;Acc:HGNC:16068]	PCNT	123.396	77.7055	129.52	211.429	129.926	216.157
ENSG00000142621	0.751684	-0.504267	3.88633	0.0486806	0.112423	forkhead associated phosphopeptide binding domain 1 [Source:HGNC Symbol;Acc:HGNC:29408]	FHAD1	0.42606	0.754213	0.32285	0.420587	1.10283	1.05812
ENSG00000144647	0.750658	4.2417	22.0718	2.62642e-06	3.05225e-05	protein O-linked mannose N-acetylglucosaminyltransferase 2 (beta 1,4-) [Source:HGNC Symbol;Acc:HGNC:25902]	POMGNT2	13.4266	13.4034	15.4493	22.4088	23.7922	24.8501
ENSG00000269693	0.750318	0.440271	6.98402	0.00822406	0.0271565			0.633332	1.15287	1.23443	1.42158	1.89831	1.63456
ENSG00000179627	0.750155	3.54967	19.63	9.39833e-06	9.31982e-05	zinc finger and BTB domain containing 42 [Source:HGNC Symbol;Acc:HGNC:32550]	ZBTB42	8.72847	10.6129	6.58045	13.1139	20.0679	11.0076
ENSG00000188021	0.749932	5.43082	22.261	2.37988e-06	2.79806e-05	ubiquilin 2 [Source:HGNC Symbol;Acc:HGNC:12509]	UBQLN2	29.5824	34.1551	32.6364	59.8158	50.6489	51.8006
ENSG00000168993	0.749906	0.869207	8.56495	0.00342697	0.0133424	complexin 1 [Source:HGNC Symbol;Acc:HGNC:2309]	CPLX1	1.17454	0.81886	1.96559	1.80011	1.36498	3.63236
ENSG00000066735	0.749872	5.07814	20.9799	4.6412e-06	5.02197e-05	kinesin family member 26A [Source:HGNC Symbol;Acc:HGNC:20226]	KIF26A	27.4636	18.9523	29.6358	39.451	37.9392	49.0605
ENSG00000187747	0.749591	-1.3218	3.82619	0.0504576	0.115592	olfactory receptor family 52 subfamily B member 6 [Source:HGNC Symbol;Acc:HGNC:15211]	OR52B6	0.172727	0.377106	0.303859	0.378528	0.542376	0.481682
ENSG00000196544	0.749293	3.44211	17.7729	2.48903e-05	0.00021387	BLOC-1 related complex subunit 6 [Source:HGNC Symbol;Acc:HGNC:25939]	BORCS6	8.53271	7.44516	8.23268	11.7175	14.5989	14.5136
ENSG00000136720	0.748812	5.00362	21.8263	2.98486e-06	3.42149e-05	heparan sulfate 6-O-sulfotransferase 1 [Source:HGNC Symbol;Acc:HGNC:5201]	HS6ST1	28.5345	23.7254	19.8173	41.6044	43.2906	35.3523
ENSG00000104142	0.748745	5.50069	24.2258	8.56777e-07	1.15474e-05	VPS18, CORVET/HOPS core subunit [Source:HGNC Symbol;Acc:HGNC:15972]	VPS18	33.486	34.4675	33.0352	51.1433	64.6512	54.7065
ENSG00000198752	0.748601	7.20325	28.4848	9.44364e-08	1.67591e-06	CDC42 binding protein kinase beta [Source:HGNC Symbol;Acc:HGNC:1738]	CDC42BPB	110.257	116.073	103.502	195.632	184.281	174.274
ENSG00000101298	0.748386	4.16338	21.488	3.56059e-06	3.99178e-05	syntaphilin [Source:HGNC Symbol;Acc:HGNC:15931]	SNPH	12.6091	13.231	14.2054	20.9536	23.8013	22.5364
ENSG00000011451	0.748028	4.66946	21.044	4.48855e-06	4.87324e-05	widely interspaced zinc finger motifs [Source:HGNC Symbol;Acc:HGNC:30917]	WIZ	19.806	18.2951	18.4025	39.2744	28.9086	27.827
ENSG00000100413	0.747855	6.87389	27.8933	1.2819e-07	2.19705e-06	RNA polymerase III subunit H [Source:HGNC Symbol;Acc:HGNC:30349]	POLR3H	102.646	72.7384	87.7678	168.125	127.657	144.607
ENSG00000266524	0.747691	0.786203	7.95989	0.00478252	0.0174578	growth differentiation factor 10 [Source:HGNC Symbol;Acc:HGNC:4215]	GDF10	0.909695	2.14412	0.617214	1.27017	4.24861	1.03443
ENSG00000181817	0.74711	3.54926	19.7121	9.00281e-06	9.01613e-05	LSM10, U7 small nuclear RNA associated [Source:HGNC Symbol;Acc:HGNC:17562]	LSM10	8.67089	9.49231	8.03328	14.7205	14.2916	14.8611
ENSG00000149300	0.747085	0.447065	5.94189	0.0147852	0.0439252	chromosome 11 open reading frame 52 [Source:HGNC Symbol;Acc:HGNC:30531]	C11orf52	1.31272	1.14209	0.512762	1.42999	2.72996	0.931779
ENSG00000182272	0.746883	-0.437713	4.32606	0.037533	0.0916591	beta-1,4-N-acetyl-galactosaminyltransferase 4 [Source:HGNC Symbol;Acc:HGNC:26315]	B4GALNT4	0.598787	0.646468	0.351337	0.580409	1.17515	0.939675
ENSG00000068781	0.746474	1.30886	4.80782	0.0283308	0.0732378	STON1-GTF2A1L readthrough [Source:HGNC Symbol;Acc:HGNC:30651]	STON1-GTF2A1L	3.59272	0.937379	1.5003	2.85158	2.62148	3.22964
ENSG00000266265	0.746394	-2.41846	1.72893	0.188547	0.317713	Kruppel like factor 14 [Source:HGNC Symbol;Acc:HGNC:23025]	KLF14	0.0575756	0.107745	0.218399	0.201882	0.244069	0.157929
ENSG00000155666	0.746076	1.82766	10.0057	0.00156059	0.00698171	lysine demethylase 8 [Source:HGNC Symbol;Acc:HGNC:25840]	KDM8	2.31454	2.29496	3.34245	4.09651	4.48364	4.58783
ENSG00000122188	0.74585	-0.264972	5.92364	0.014939	0.0442428	lymphocyte transmembrane adaptor 1 [Source:HGNC Symbol;Acc:HGNC:26005]	LAX1	0.333939	0.829634	0.626709	0.496292	1.36498	1.18446
ENSG00000181790	0.745717	-0.147739	4.97905	0.0256561	0.0676217	adhesion G protein-coupled receptor B1 [Source:HGNC Symbol;Acc:HGNC:943]	ADGRB1	0.44909	0.872732	0.645701	0.908467	0.89492	1.47663
ENSG00000198598	0.745519	-0.0797285	4.92227	0.0265126	0.0694337	matrix metallopeptidase 17 [Source:HGNC Symbol;Acc:HGNC:7163]	MMP17	0.379999	0.883507	0.788135	0.832761	0.867801	1.74511
ENSG00000164916	0.745209	6.96535	26.7367	2.33154e-07	3.71032e-06	forkhead box K1 [Source:HGNC Symbol;Acc:HGNC:23480]	FOXK1	94.5507	86.0018	99.8462	152.959	157.967	158.276
ENSG00000175093	0.745121	2.56195	13.1122	0.000293374	0.00171581	splA/ryanodine receptor domain and SOCS box containing 4 [Source:HGNC Symbol;Acc:HGNC:30630]	SPSB4	4.2606	4.37443	4.47243	6.04803	8.27123	7.83326
ENSG00000148143	0.745118	6.23464	24.0411	9.43024e-07	1.25723e-05	zinc finger protein 462 [Source:HGNC Symbol;Acc:HGNC:21684]	ZNF462	49.3423	60.2832	59.2905	100.419	85.2163	97.0866
ENSG00000178826	0.745093	1.85544	7.97304	0.00474792	0.0173552	transmembrane protein 139 [Source:HGNC Symbol;Acc:HGNC:22058]	TMEM139	4.6406	3.631	0.550745	5.99756	5.31528	1.48453
ENSG00000129749	0.744915	-0.250331	5.99053	0.0143829	0.0429691	cholinergic receptor nicotinic alpha 10 subunit [Source:HGNC Symbol;Acc:HGNC:13800]	CHRNA10	0.42606	0.517175	0.883091	0.664527	1.02147	1.35819
ENSG00000063587	0.744763	4.31745	17.8027	2.45038e-05	0.000210775	zinc finger protein 275 [Source:HGNC Symbol;Acc:HGNC:13069]	ZNF275	11.8491	17.0344	16.0571	25.925	24.5244	24.0604
ENSG00000130758	0.744555	4.10061	18.9332	1.35377e-05	0.000126276	mitogen-activated protein kinase kinase kinase 10 [Source:HGNC Symbol;Acc:HGNC:6849]	MAP3K10	15.9715	12.8324	9.76147	22.0892	25.2566	16.8747
ENSG00000196535	0.744514	8.42111	29.5623	5.41483e-08	1.03061e-06	myosin XVIIIA [Source:HGNC Symbol;Acc:HGNC:31104]	MYO18A	270.156	240.896	257.749	451.895	410.425	425.341
ENSG00000156381	0.743983	6.49191	25.6332	4.12879e-07	6.172e-06	ankyrin repeat domain 9 [Source:HGNC Symbol;Acc:HGNC:20096]	ANKRD9	81.6653	76.3802	46.2246	123.097	122.993	89.5139
ENSG00000152822	0.743815	3.03982	11.4794	0.000703718	0.0035823	glutamate metabotropic receptor 1 [Source:HGNC Symbol;Acc:HGNC:4593]	GRM1	7.47332	7.05728	4.14958	8.77343	11.634	10.1074
ENSG00000147650	0.743261	4.789	19.5204	9.95287e-06	9.803e-05	LDL receptor related protein 12 [Source:HGNC Symbol;Acc:HGNC:31708]	LRP12	18.0672	22.6587	20.6339	33.0665	44.1855	27.1005
ENSG00000257923	0.742588	7.03932	25.4072	4.64178e-07	6.80553e-06	cut like homeobox 1 [Source:HGNC Symbol;Acc:HGNC:2557]	CUX1	91.2689	112.324	89.4295	161.076	204.819	130.141
ENSG00000167470	0.742489	5.30704	21.1185	4.31737e-06	4.72581e-05	midnolin [Source:HGNC Symbol;Acc:HGNC:16298]	MIDN	28.0048	26.419	34.3456	55.4081	41.9799	51.1926
ENSG00000276289	0.742133	2.40161	12.9383	0.000321935	0.00185309	potassium voltage-gated channel subfamily E regulatory subunit 1B [Source:HGNC Symbol;Acc:HGNC:52280]	KCNE1B	3.83454	2.79059	5.21308	6.77144	4.72771	8.1728
ENSG00000175931	0.741896	5.76898	24.5053	7.41053e-07	1.02198e-05	ubiquitin conjugating enzyme E2 O [Source:HGNC Symbol;Acc:HGNC:29554]	UBE2O	39.8999	35.545	46.5284	64.4675	57.9528	82.5967
ENSG00000185019	0.74166	3.5001	18.4244	1.76784e-05	0.000159334	U-box domain containing 5 [Source:HGNC Symbol;Acc:HGNC:17777]	UBOX5	7.42726	7.15425	11.0054	13.8457	12.8453	15.4217
ENSG00000215218	0.741653	4.8696	21.1482	4.25091e-06	4.66262e-05	ubiquitin conjugating enzyme E2 Q family like 1 [Source:HGNC Symbol;Acc:HGNC:37269]	UBE2QL1	26.5193	20.9887	17.7853	42.4288	40.7867	26.7452
ENSG00000078725	0.741421	1.79954	10.1879	0.00141363	0.00641556	BMP/retinoic acid inducible neural specific 1 [Source:HGNC Symbol;Acc:HGNC:2687]	BRINP1	2.42969	3.60945	1.67123	3.49928	6.56275	2.97695
ENSG00000186051	0.740778	-3.05313	1.21538	0.270269	0.414138	TAL bHLH transcription factor 2 [Source:HGNC Symbol;Acc:HGNC:11557]	TAL2	0.161212	0.0646468	0.0189912	0.109352	0.207911	0.055275
ENSG00000177853	0.740439	5.14152	5.79599	0.0160628	0.0469377	zinc finger protein 518A [Source:HGNC Symbol;Acc:HGNC:29009]	ZNF518A	18.4357	48.9915	17.6713	40.881	34.2872	51.3584
ENSG00000115274	0.74008	2.28501	5.76756	0.0163247	0.0475296	INO80 complex subunit B [Source:HGNC Symbol;Acc:HGNC:13324]	INO80B	5.72302	1.96095	3.76975	5.33304	6.40907	5.89863
ENSG00000183888	0.73982	-0.890651	4.47133	0.0344682	0.0857424	chromosome 1 open reading frame 64 [Source:HGNC Symbol;Acc:HGNC:28339]	C1orf64	0.564241	0.183166	0.417806	0.841173	0.325425	0.750161
ENSG00000171522	0.739759	3.38508	11.7925	0.00059469	0.00310825	prostaglandin E receptor 4 [Source:HGNC Symbol;Acc:HGNC:9596]	PTGER4	4.68666	7.05728	9.86593	6.77144	8.83168	25.237
ENSG00000221995	0.739468	5.16357	19.4097	1.05471e-05	0.000102809	TGFB1-induced anti-apoptotic factor 1 [Source:HGNC Symbol;Acc:HGNC:11803]	TIAF1	34.9139	19.5988	27.1954	48.8806	41.0398	43.2566
ENSG00000182327	0.739388	-1.30922	3.81569	0.0507748	0.116089	glycolipid transfer protein domain containing 2 [Source:HGNC Symbol;Acc:HGNC:33756]	GLTPD2	0.218787	0.280136	0.341842	0.353293	0.415821	0.655404
ENSG00000136859	0.739223	5.58864	24.5793	7.13139e-07	9.89442e-06	angiopoietin like 2 [Source:HGNC Symbol;Acc:HGNC:490]	ANGPTL2	25.4599	38.6588	44.2305	44.4812	60.728	74.9845
ENSG00000177352	0.739186	3.71058	18.9684	1.329e-05	0.000124423	coiled-coil domain containing 71 [Source:HGNC Symbol;Acc:HGNC:25760]	CCDC71	9.78786	9.88019	9.60005	14.0476	16.9944	18.067
ENSG00000109066	0.739149	3.30176	17.6044	2.71956e-05	0.000230222	transmembrane protein 104 [Source:HGNC Symbol;Acc:HGNC:25984]	TMEM104	6.27574	7.56368	8.33713	12.0456	11.9413	12.8238
ENSG00000171219	0.739126	0.0300512	3.20233	0.0735333	0.155315	CDC42 binding protein kinase gamma [Source:HGNC Symbol;Acc:HGNC:29829]	CDC42BPG	0.138182	0.721889	1.74719	0.740232	0.858762	1.72932
ENSG00000264187	0.73897	-2.65607	1.96964	0.160486	0.281871			0.0806059	0.0861958	0.132938	0.126176	0.126554	0.260582
ENSG00000204366	0.738706	1.23384	7.24426	0.00711279	0.0240518	zinc finger and BTB domain containing 12 [Source:HGNC Symbol;Acc:HGNC:19066]	ZBTB12	1.55454	2.13335	1.5098	2.30481	2.70284	3.73501
ENSG00000183134	0.738644	3.22031	16.2762	5.47467e-05	0.000418168	prostaglandin D2 receptor 2 [Source:HGNC Symbol;Acc:HGNC:4502]	PTGDR2	10.7666	4.65457	5.96324	14.6532	8.41586	11.3077
ENSG00000136367	0.738476	1.38867	7.46501	0.00629097	0.0217691	zinc finger homeobox 2 [Source:HGNC Symbol;Acc:HGNC:20152]	ZFHX2	1.10545	1.97173	2.82969	2.75905	2.35933	4.48517
ENSG00000163885	0.738006	-1.60517	3.40759	0.0648972	0.140804	cilia and flagella associated protein 100 [Source:HGNC Symbol;Acc:HGNC:26842]	CFAP100	0.253333	0.215489	0.218399	0.403763	0.397742	0.347443
ENSG00000128917	0.737988	4.72116	22.2552	2.38714e-06	2.80453e-05	delta like canonical Notch ligand 4 [Source:HGNC Symbol;Acc:HGNC:2910]	DLL4	20.4163	13.9206	24.4227	32.1665	22.3188	44.8122
ENSG00000143319	0.737701	2.97651	12.4549	0.0004169	0.00230851	interferon stimulated exonuclease gene 20 like 2 [Source:HGNC Symbol;Acc:HGNC:25745]	ISG20L2	5.8612	5.82899	5.68786	6.93127	11.643	11.1024
ENSG00000106991	0.737515	6.94274	17.2402	3.29397e-05	0.000270419	endoglin [Source:HGNC Symbol;Acc:HGNC:3349]	ENG	84.4519	75.5075	107.661	167.444	88.2536	214.585
ENSG00000186222	0.737293	2.58517	13.4685	0.000242606	0.00147264	biogenesis of lysosomal organelles complex 1 subunit 4 [Source:HGNC Symbol;Acc:HGNC:24206]	BLOC1S4	4.12241	4.26669	5.04216	6.55274	8.04524	7.80167
ENSG00000177508	0.737158	4.77273	20.527	5.87975e-06	6.19074e-05	iroquois homeobox 3 [Source:HGNC Symbol;Acc:HGNC:14360]	IRX3	11.2503	15.8708	32.9212	15.7047	29.4962	58.5441
ENSG00000184350	0.736814	-2.09535	2.61459	0.105885	0.206424	MAS related GPR family member E [Source:HGNC Symbol;Acc:HGNC:30694]	MRGPRE	0.092121	0.183166	0.199408	0.168235	0.280227	0.339546
ENSG00000184939	0.736651	3.16741	7.95321	0.00480022	0.0174985	ZFP90 zinc finger protein [Source:HGNC Symbol;Acc:HGNC:23329]	ZFP90	5.57332	7.33741	6.13416	13.1055	16.2532	5.34588
ENSG00000020256	0.736474	3.37557	18.8263	1.43176e-05	0.000132778	ZFP64 zinc finger protein [Source:HGNC Symbol;Acc:HGNC:15940]	ZFP64	6.97817	8.00543	8.31814	12.0372	12.7639	13.9925
ENSG00000076984	0.736129	3.38468	18.8232	1.43414e-05	0.000132922	mitogen-activated protein kinase kinase 7 [Source:HGNC Symbol;Acc:HGNC:6847]	MAP2K7	7.49635	7.62832	8.31814	13.1812	12.2848	13.5819
ENSG00000160223	0.73587	2.57529	12.3946	0.000430569	0.00236783	inducible T-cell costimulator ligand [Source:HGNC Symbol;Acc:HGNC:17087]	ICOSLG	1.79636	6.75559	5.05166	3.26375	9.27462	9.43623
ENSG00000122778	0.735796	3.87021	18.7171	1.51614e-05	0.000139713	KIAA1549 [Source:HGNC Symbol;Acc:HGNC:22219]	KIAA1549	16.1672	11.4102	4.38697	28.1877	21.2882	6.17501
ENSG00000110987	0.734968	4.77494	21.719	3.15641e-06	3.58734e-05	BCL tumor suppressor 7A [Source:HGNC Symbol;Acc:HGNC:1004]	BCL7A	25.0569	17.3253	19.466	38.9211	32.6329	30.7013
ENSG00000215910	0.734756	-0.00895973	6.00742	0.0142459	0.042663	chromosome 1 open reading frame 167 [Source:HGNC Symbol;Acc:HGNC:25262]	C1orf167	0.264848	0.635694	1.27241	0.538351	0.876841	2.17152
ENSG00000055118	0.733702	6.39467	28.1987	1.09479e-07	1.91112e-06	potassium voltage-gated channel subfamily H member 2 [Source:HGNC Symbol;Acc:HGNC:6251]	KCNH2	80.0186	57.665	51.9219	131.181	99.3	84.5787
ENSG00000162783	0.733622	5.71458	20.3555	6.4307e-06	6.69434e-05	immediate early response 5 [Source:HGNC Symbol;Acc:HGNC:5393]	IER5	51.6569	37.5167	29.6642	71.9371	75.4083	48.7447
ENSG00000008441	0.73358	6.26481	22.4202	2.19059e-06	2.60501e-05	nuclear factor I X [Source:HGNC Symbol;Acc:HGNC:7788]	NFIX	49.5956	67.5667	56.5178	104.39	97.3474	85.7789
ENSG00000204237	0.733189	2.88062	11.666	0.000636527	0.00330001	oxidoreductase like domain containing 1 [Source:HGNC Symbol;Acc:HGNC:27901]	OXLD1	4.76726	5.93673	5.66887	9.08467	7.00569	11.5367
ENSG00000155506	0.732453	7.78028	25.1722	5.24313e-07	7.5153e-06	La ribonucleoprotein domain family member 1 [Source:HGNC Symbol;Acc:HGNC:29531]	LARP1	157.838	173.587	162.963	308.391	270.546	245.516
ENSG00000133316	0.731395	4.96643	6.80582	0.00908611	0.0294568	WD repeat domain 74 [Source:HGNC Symbol;Acc:HGNC:25529]	WDR74	12.183	54.3249	11.955	41.5371	49.6093	17.8538
ENSG00000184371	0.730959	4.45108	20.9865	4.62521e-06	5.00804e-05	colony stimulating factor 1 [Source:HGNC Symbol;Acc:HGNC:2432]	CSF1	10.7321	15.0412	23.3212	18.9012	22.4272	40.6034
ENSG00000185274	0.730755	6.08267	24.6966	6.71024e-07	9.37503e-06	Williams-Beuren syndrome chromosome region 17 [Source:HGNC Symbol;Acc:HGNC:16347]	WBSCR17	33.129	70.1741	48.437	55.0043	124.746	74.9924
ENSG00000125459	0.730029	3.22331	15.2375	9.4801e-05	0.000666602	misato 1, mitochondrial distribution and morphology regulator [Source:HGNC Symbol;Acc:HGNC:29678]	MSTO1	5.80362	6.05525	8.8404	10.868	7.98196	16.2824
ENSG00000099331	0.729585	5.83057	22.6761	1.91735e-06	2.32946e-05	myosin IXB [Source:HGNC Symbol;Acc:HGNC:7609]	MYO9B	36.3878	47.44	44.9142	67.2181	68.2489	77.0613
ENSG00000177191	0.729481	2.51875	12.8355	0.000340105	0.00193132	UDP-GlcNAc:betaGal beta-1,3-N-acetylglucosaminyltransferase 8 [Source:HGNC Symbol;Acc:HGNC:24139]	B3GNT8	4.20302	3.18924	5.50745	6.48544	5.71302	9.09669
ENSG00000163704	0.729325	2.01148	10.2299	0.00138186	0.00628563	proline rich transmembrane protein 3 [Source:HGNC Symbol;Acc:HGNC:26591]	PRRT3	2.37212	3.22157	3.38993	4.03763	4.50172	6.48297
ENSG00000133985	0.728998	2.80507	12.8927	0.000329866	0.00188573	tetratricopeptide repeat domain 9 [Source:HGNC Symbol;Acc:HGNC:20267]	TTC9	4.60605	8.21015	2.50684	9.21084	13.9481	3.3244
ENSG00000174276	0.727968	2.52547	11.1765	0.000828402	0.00411377	zinc finger HIT-type containing 2 [Source:HGNC Symbol;Acc:HGNC:1177]	ZNHIT2	4.1109	3.52325	5.33653	5.78727	7.73789	7.87274
ENSG00000103150	0.727866	7.85768	27.3631	1.68617e-07	2.78917e-06	malonyl-CoA decarboxylase [Source:HGNC Symbol;Acc:HGNC:7150]	MLYCD	203.438	157.35	163.733	322.497	255.088	289.436
ENSG00000205869	0.727761	-0.870991	3.78383	0.05175	0.117999	keratin associated protein 5-1 [Source:HGNC Symbol;Acc:HGNC:23596]	KRTAP5-1	0.552726	0.183166	0.38932	0.87482	0.198871	0.915986
ENSG00000205238	0.727162	-0.0355099	4.19594	0.0405209	0.0971641	speedy/RINGO cell cycle regulator family member E2 [Source:HGNC Symbol;Acc:HGNC:33841]	SPDYE2	0.748483	0.527949	0.750152	2.0104	1.0034	0.655404
ENSG00000149503	0.726911	3.37192	16.8769	3.98849e-05	0.000319577	inner centromere protein [Source:HGNC Symbol;Acc:HGNC:6058]	INCENP	8.06059	8.50106	6.77036	11.3474	14.4905	12.7843
ENSG00000268533	0.726906	-2.08971	1.93875	0.163804	0.286412			0.195757	0.0969702	0.180416	0.151411	0.352544	0.300064
ENSG00000101463	0.726862	5.03376	18.5809	1.62841e-05	0.000148945	synapse differentiation inducing 1 [Source:HGNC Symbol;Acc:HGNC:15885]	SYNDIG1	27.9702	24.8998	20.6909	38.9715	50.9562	32.9044
ENSG00000176087	0.726853	5.30793	21.7195	3.15572e-06	3.58734e-05	solute carrier family 35 member A4 [Source:HGNC Symbol;Acc:HGNC:20753]	SLC35A4	28.3618	30.4163	30.6328	50.361	51.8782	45.8625
ENSG00000230797	0.726253	1.64012	9.49391	0.00206155	0.00878624	YY2 transcription factor [Source:HGNC Symbol;Acc:HGNC:31684]	YY2	2.54484	2.0256	2.42138	3.60863	3.72431	4.2088
ENSG00000125462	0.725848	-3.22704	1.38604	0.239075	0.378506	chromosome 1 open reading frame 61 [Source:HGNC Symbol;Acc:HGNC:30780]	C1orf61	0.0345454	0.0646468	0.094956	0.0757056	0.0994355	0.142136
ENSG00000119866	0.725229	3.09342	17.1178	3.51316e-05	0.000286069	B-cell CLL/lymphoma 11A [Source:HGNC Symbol;Acc:HGNC:13221]	BCL11A	6.93211	5.08555	7.18817	11.0951	8.29835	12.429
ENSG00000175785	0.725142	1.16566	3.75966	0.0525033	0.119431	proline rich membrane anchor 1 [Source:HGNC Symbol;Acc:HGNC:18319]	PRIMA1	1.00182	1.83166	2.08903	4.15539	2.19662	2.00569
ENSG00000182177	0.725012	4.27987	19.686	9.12666e-06	9.08979e-05	ankyrin repeat and SOCS box containing 18 [Source:HGNC Symbol;Acc:HGNC:19770]	ASB18	14.2212	15.763	13.7401	27.0774	25.1572	20.4281
ENSG00000203485	0.724629	5.34225	17.8387	2.40437e-05	0.000207373	inverted formin, FH2 and WH2 domain containing [Source:HGNC Symbol;Acc:HGNC:23791]	INF2	24.2739	36.8271	31.0601	45.5495	46.8974	58.6152
ENSG00000179886	0.724482	3.80023	19.3601	1.08244e-05	0.000105001	tigger transposable element derived 5 [Source:HGNC Symbol;Acc:HGNC:18336]	TIGD5	10.2369	10.7852	10.3977	15.8561	18.2148	17.9249
ENSG00000148426	0.724416	0.443121	7.02223	0.00805037	0.0266819	proline and serine rich 2 [Source:HGNC Symbol;Acc:HGNC:23728]	PROSER2	0.667877	1.5192	0.807126	1.22811	2.66668	1.12919
ENSG00000114654	0.724253	2.5548	12.0468	0.0005188	0.00277403	EF-hand and coiled-coil domain containing 1 [Source:HGNC Symbol;Acc:HGNC:25692]	EFCC1	4.24908	3.56635	5.20359	7.77244	4.80906	9.45992
ENSG00000182162	0.723535	2.43971	10.9184	0.000952152	0.00461811	purinergic receptor P2Y8 [Source:HGNC Symbol;Acc:HGNC:15524]	P2RY8	3.74242	3.85726	4.39646	4.82833	6.51755	9.02562
ENSG00000256223	0.723256	3.09723	12.8314	0.000340849	0.00193486	zinc finger protein 10 [Source:HGNC Symbol;Acc:HGNC:12879]	ZNF10	5.99938	6.21687	6.9128	10.9689	12.8724	8.21229
ENSG00000132681	0.722564	0.468021	4.49212	0.0340514	0.0849298	ATPase Na+/K+ transporting subunit alpha 4 [Source:HGNC Symbol;Acc:HGNC:14073]	ATP1A4	1.58909	1.46533	0.189912	3.06187	1.32882	0.55275
ENSG00000157637	0.722552	5.90828	23.9745	9.762e-07	1.29094e-05	solute carrier family 38 member 10 [Source:HGNC Symbol;Acc:HGNC:28237]	SLC38A10	36.8599	51.8037	47.2406	60.6233	84.918	78.7274
ENSG00000162913	0.722371	0.920665	8.32139	0.0039181	0.0148997	chromosome 1 open reading frame 145 [Source:HGNC Symbol;Acc:HGNC:32047]	C1orf145	1.31272	1.34681	1.56677	2.21229	2.29606	2.45579
ENSG00000188026	0.722091	5.99629	21.0121	4.5638e-06	4.94824e-05	Rab interacting lysosomal protein like 1 [Source:HGNC Symbol;Acc:HGNC:26814]	RILPL1	55.2035	44.8218	44.5723	77.5393	71.9009	88.8032
ENSG00000196663	0.721775	5.71566	23.4006	1.31536e-06	1.68629e-05	tectonin beta-propeller repeat containing 2 [Source:HGNC Symbol;Acc:HGNC:19957]	TECPR2	43.1932	41.2447	34.4785	70.7174	69.2614	56.2542
ENSG00000026036	0.721589	3.97261	19.8105	8.551e-06	8.62365e-05	RTEL1-TNFRSF6B readthrough (NMD candidate) [Source:HGNC Symbol;Acc:HGNC:44095]	RTEL1-TNFRSF6B	12.2521	9.83709	13.3128	19.8685	15.7289	23.0102
ENSG00000068354	0.721555	4.06608	19.9494	7.95207e-06	8.08578e-05	TBC1 domain family member 25 [Source:HGNC Symbol;Acc:HGNC:8092]	TBC1D25	13.8297	13.6944	10.3407	24.3435	20.7368	17.3958
ENSG00000205336	0.721411	4.61395	20.6001	5.65918e-06	5.98998e-05	adhesion G protein-coupled receptor G1 [Source:HGNC Symbol;Acc:HGNC:4512]	ADGRG1	21.5103	15.7092	18.0796	33.1927	24.2532	34.002
ENSG00000164086	0.721253	3.95796	18.7363	1.50097e-05	0.000138554	dual specificity phosphatase 7 [Source:HGNC Symbol;Acc:HGNC:3073]	DUSP7	11.2388	10.5482	13.0849	18.8843	15.3402	23.9578
ENSG00000139266	0.72103	3.53554	18.2253	1.96257e-05	0.000173951	membrane associated ring-CH-type finger 9 [Source:HGNC Symbol;Acc:HGNC:25139]	MARCH9	9.24665	9.23372	7.71043	13.3074	16.4701	13.4476
ENSG00000019144	0.720889	7.64886	24.5395	7.28032e-07	1.00749e-05	pleckstrin homology like domain family B member 1 [Source:HGNC Symbol;Acc:HGNC:23697]	PHLDB1	122.544	208.658	129.159	211.605	295.803	236.237
ENSG00000087903	0.720831	2.67715	13.3531	0.000257996	0.00154936	regulatory factor X2 [Source:HGNC Symbol;Acc:HGNC:9983]	RFX2	3.70787	4.15895	6.53297	6.72097	6.165	10.8892
ENSG00000156983	0.720637	4.36345	20.9687	4.66845e-06	5.04804e-05	bromodomain and PHD finger containing 1 [Source:HGNC Symbol;Acc:HGNC:14255]	BRPF1	15.0503	16.0324	15.4683	24.1248	27.2634	25.3949
ENSG00000183798	0.720457	3.93602	19.1156	1.23033e-05	0.000116387	elastin microfibril interfacer 3 [Source:HGNC Symbol;Acc:HGNC:16123]	EMILIN3	11.5036	19.06	4.68133	19.0862	29.0804	8.30704
ENSG00000040608	0.720292	0.346888	4.65435	0.030975	0.0786398	reticulon 4 receptor [Source:HGNC Symbol;Acc:HGNC:18601]	RTN4R	0.932725	1.10977	0.71217	0.891643	1.78984	2.03728
ENSG00000269720	0.720107	-2.21919	1.68673	0.194033	0.324332			0.0575756	0.0861958	0.32285	0.260764	0.126554	0.284271
ENSG00000130699	0.720041	3.70132	18.9172	1.36519e-05	0.000127119	TATA-box binding protein associated factor 4 [Source:HGNC Symbol;Acc:HGNC:11537]	TAF4	9.94907	10.0957	9.33417	17.8833	15.2498	15.3665
ENSG00000140564	0.719906	6.04916	24.4451	7.64563e-07	1.05168e-05	furin, paired basic amino acid cleaving enzyme [Source:HGNC Symbol;Acc:HGNC:8568]	FURIN	50.3672	46.2333	53.5742	82.7378	80.1722	84.0496
ENSG00000179846	0.719773	-0.616926	4.90236	0.02682	0.0700685	NTPase KAP family P-loop domain containing 1 [Source:HGNC Symbol;Acc:HGNC:24739]	NKPD1	0.414545	0.474077	0.531753	0.748644	0.858762	0.734368
ENSG00000160959	0.719298	4.43952	18.9681	1.32925e-05	0.000124423	leucine rich repeat containing 14 [Source:HGNC Symbol;Acc:HGNC:20419]	LRRC14	17.5145	15.5907	15.8956	25.5632	24.3707	31.0803
ENSG00000132024	0.718818	4.14965	19.9018	8.15222e-06	8.27879e-05	coiled-coil and C2 domain containing 1A [Source:HGNC Symbol;Acc:HGNC:30237]	CC2D1A	14.1981	10.2788	15.5443	24.781	15.982	25.5213
ENSG00000054179	0.718655	-0.461277	3.96651	0.0464139	0.108265	ectonucleoside triphosphate diphosphohydrolase 2 [Source:HGNC Symbol;Acc:HGNC:3364]	ENTPD2	0.47212	0.571047	0.484275	1.37111	0.623732	0.679093
ENSG00000131409	0.718505	0.308237	5.87722	0.015338	0.0452405	leucine rich repeat containing 4B [Source:HGNC Symbol;Acc:HGNC:25042]	LRRC4B	0.598787	0.657243	1.38636	0.664527	1.38306	2.54265
ENSG00000078814	0.718377	8.79024	25.1149	5.40134e-07	7.70761e-06	myosin heavy chain 7B [Source:HGNC Symbol;Acc:HGNC:15906]	MYH7B	373.816	203.713	406.601	585.65	299.165	787.156
ENSG00000143294	0.71814	3.90214	19.1076	1.23549e-05	0.000116738	papillary renal cell carcinoma (translocation-associated) [Source:HGNC Symbol;Acc:HGNC:9343]	PRCC	12.6666	10.3327	10.9104	19.347	17.5097	18.7698
ENSG00000099849	0.717781	1.07791	4.01754	0.0450294	0.105728	Ras association domain family member 7 [Source:HGNC Symbol;Acc:HGNC:1166]	RASSF7	1.01333	2.34883	1.09199	0.92529	3.09154	4.01928
ENSG00000204682	0.717737	1.91228	9.88443	0.00166683	0.00737278	cancer susceptibility 10 [Source:HGNC Symbol;Acc:HGNC:31448]	CASC10	2.77515	3.42628	2.25995	3.96192	5.98421	4.02718
ENSG00000078687	0.717422	5.692	22.6562	1.93736e-06	2.34843e-05	trinucleotide repeat containing 6C [Source:HGNC Symbol;Acc:HGNC:29318]	TNRC6C	37.712	31.6877	48.0382	67.8995	51.137	73.5158
ENSG00000171798	0.717408	1.68345	8.80957	0.00299654	0.0119363	kinase non-catalytic C-lobe domain containing 1 [Source:HGNC Symbol;Acc:HGNC:29374]	KNDC1	0.863634	4.80541	1.74719	1.75805	7.43055	2.53475
ENSG00000183682	0.717079	-0.222821	5.37664	0.0204082	0.0565424	bone morphogenetic protein 8a [Source:HGNC Symbol;Acc:HGNC:21650]	BMP8A	0.564241	0.808085	0.531753	0.975761	1.02147	1.08971
ENSG00000141431	0.716983	2.7244	6.24456	0.0124575	0.0382071	additional sex combs like 3, transcriptional regulator [Source:HGNC Symbol;Acc:HGNC:29357]	ASXL3	4.44484	4.04043	6.21962	10.8343	8.84976	5.0932
ENSG00000110680	0.716295	-3.10596	1.36183	0.243221	0.383586	calcitonin related polypeptide alpha [Source:HGNC Symbol;Acc:HGNC:1437]	CALCA	0.0460605	0.0646468	0.104452	0.142999	0.0994355	0.11055
ENSG00000119596	0.715971	6.60974	23.0898	1.54608e-06	1.94308e-05	YLP motif containing 1 [Source:HGNC Symbol;Acc:HGNC:17798]	YLPM1	67.4441	82.1122	72.0906	130.744	125.759	107.66
ENSG00000165621	0.715962	-2.72645	1.56001	0.211663	0.346749	oxoglutarate receptor 1 [Source:HGNC Symbol;Acc:HGNC:4531]	OXGR1	0.161212	0.0215489	0.113947	0.185058	0.045198	0.244789
ENSG00000259417	0.71572	3.50314	18.2074	1.98108e-05	0.000175397	long intergenic non-protein coding RNA 1314 [Source:HGNC Symbol;Acc:HGNC:50507]	LINC01314	9.79937	12.757	2.71574	16.5627	21.9843	4.09825
ENSG00000007314	0.715524	1.23915	7.92883	0.00486533	0.0177077	sodium voltage-gated channel alpha subunit 4 [Source:HGNC Symbol;Acc:HGNC:10591]	SCN4A	2.34909	1.45455	1.40535	4.32363	1.88024	2.59003
ENSG00000197283	0.714725	3.2898	16.708	4.35975e-05	0.000344163	synaptic Ras GTPase activating protein 1 [Source:HGNC Symbol;Acc:HGNC:11497]	SYNGAP1	6.04544	8.57648	7.63446	10.9857	12.7006	12.5632
ENSG00000185864	0.714668	4.48482	9.78792	0.00175662	0.00769753	nuclear pore complex interacting protein family member B4 [Source:HGNC Symbol;Acc:HGNC:41985]	NPIPB4	14.1406	19.0277	16.7217	37.3144	19.173	27.7796
ENSG00000243477	0.714628	1.7841	8.86444	0.0029078	0.0116406	N-acetyltransferase 6 [Source:HGNC Symbol;Acc:HGNC:30252]	NAT6	2.41818	1.62694	3.77925	3.27216	3.37177	6.00129
ENSG00000177045	0.71459	3.86331	17.8179	2.43084e-05	0.000209315	SIX homeobox 5 [Source:HGNC Symbol;Acc:HGNC:10891]	SIX5	10.9624	9.69702	12.4297	17.6394	18.495	17.9249
ENSG00000213199	0.714522	0.679699	7.03554	0.00799077	0.0265118	acid sensing ion channel subunit 3 [Source:HGNC Symbol;Acc:HGNC:101]	ASIC3	1.26666	0.958928	1.28191	2.06087	1.26554	2.59793
ENSG00000130035	0.714478	1.11274	7.02111	0.00805544	0.0266877	polypeptide N-acetylgalactosaminyltransferase 8 [Source:HGNC Symbol;Acc:HGNC:4130]	GALNT8	2.98242	0.721889	1.42434	3.55816	1.47345	2.66899
ENSG00000204172	0.714396	3.02595	13.9286	0.000189888	0.0012018	ArfGAP with GTPase domain, ankyrin repeat and PH domain 9 [Source:HGNC Symbol;Acc:HGNC:23463]	AGAP9	7.20847	8.33944	3.16203	13.2401	10.9921	5.79598
ENSG00000104957	0.714315	3.98759	19.3332	1.09782e-05	0.000106108	coiled-coil domain containing 130 [Source:HGNC Symbol;Acc:HGNC:28118]	CCDC130	12.563	9.81554	13.5597	22.1733	15.8012	21.0835
ENSG00000175564	0.714082	0.755004	7.71043	0.00549027	0.0194822	uncoupling protein 3 [Source:HGNC Symbol;Acc:HGNC:12519]	UCP3	1.12848	1.28216	1.35787	2.08611	1.84408	2.25838
ENSG00000136378	0.713998	4.51713	20.1729	7.07483e-06	7.25827e-05	ADAM metallopeptidase with thrombospondin type 1 motif 7 [Source:HGNC Symbol;Acc:HGNC:223]	ADAMTS7	16.4666	12.2613	23.1123	30.1897	18.721	36.4341
ENSG00000158169	0.713777	5.11822	16.337	5.30176e-05	0.000407485	Fanconi anemia complementation group C [Source:HGNC Symbol;Acc:HGNC:3584]	FANCC	21.1187	30.6641	27.3188	45.9365	46.8251	36.3631
ENSG00000168612	0.713034	3.31883	15.4381	8.52529e-05	0.000608543	zinc finger SWIM-type containing 1 [Source:HGNC Symbol;Acc:HGNC:16155]	ZSWIM1	8.48665	5.48421	8.87838	12.1213	10.9289	13.7951
ENSG00000082641	0.712908	9.42563	24.6473	6.88425e-07	9.58472e-06	nuclear factor, erythroid 2 like 1 [Source:HGNC Symbol;Acc:HGNC:7781]	NFE2L1	506.286	535.782	513.588	927.553	937.542	705.27
ENSG00000085741	0.712891	2.6048	9.48474	0.00207188	0.00881857	Wnt family member 11 [Source:HGNC Symbol;Acc:HGNC:12776]	WNT11	5.60787	3.84649	4.35848	6.22468	8.19891	8.10174
ENSG00000177374	0.712815	4.99881	21.098	4.36385e-06	4.76787e-05	HIC ZBTB transcriptional repressor 1 [Source:HGNC Symbol;Acc:HGNC:4909]	HIC1	16.386	16.5819	39.0839	26.9344	26.0612	66.5669
ENSG00000133275	0.712509	4.84368	21.6761	3.22791e-06	3.65305e-05	casein kinase 1 gamma 2 [Source:HGNC Symbol;Acc:HGNC:2455]	CSNK1G2	21.4987	22.8096	20.8713	33.302	38.6623	34.9733
ENSG00000125787	0.712333	-2.19853	1.98775	0.158576	0.279528	gonadotropin releasing hormone 2 [Source:HGNC Symbol;Acc:HGNC:4420]	GNRH2	0.0806059	0.258587	0.123443	0.176646	0.235029	0.300064
ENSG00000234719	0.712317	0.991949	6.57885	0.0103198	0.0327539	nuclear pore complex interacting protein family, member B2 [Source:HGNC Symbol;Acc:HGNC:37451]	NPIPB2	0.783029	2.23032	1.62375	1.85899	2.59436	2.67689
ENSG00000168828	0.712254	-2.51336	1.68732	0.193955	0.324304	olfactory receptor family 13 subfamily J member 1 [Source:HGNC Symbol;Acc:HGNC:15108]	OR13J1	0.138182	0.107745	0.094956	0.100941	0.262148	0.2211
ENSG00000149798	0.71217	4.05563	19.699	9.06482e-06	9.05634e-05	CDC42 effector protein 2 [Source:HGNC Symbol;Acc:HGNC:16263]	CDC42EP2	11.3769	12.089	14.2719	17.9675	20.8634	23.026
ENSG00000183495	0.711644	6.0971	18.9308	1.35548e-05	0.000126362	E1A binding protein p400 [Source:HGNC Symbol;Acc:HGNC:11958]	EP400	43.5848	58.9148	53.7451	90.5859	79.9462	83.7811
ENSG00000177311	0.711068	7.93819	23.1138	1.5269e-06	1.92212e-05	zinc finger and BTB domain containing 38 [Source:HGNC Symbol;Acc:HGNC:26636]	ZBTB38	171.518	271.721	112.57	336.108	414.14	165.391
ENSG00000181894	0.710697	3.55167	5.50572	0.0189544	0.0534303	zinc finger protein 329 [Source:HGNC Symbol;Acc:HGNC:14209]	ZNF329	12.1485	5.5704	9.11577	9.14355	17.5911	16.6299
ENSG00000173376	0.710567	3.40038	17.3357	3.13238e-05	0.000259145	neuron derived neurotrophic factor [Source:HGNC Symbol;Acc:HGNC:26256]	NDNF	5.34302	7.00341	11.5941	8.20985	12.5379	18.4619
ENSG00000125651	0.710456	5.3774	18.3498	1.83834e-05	0.000164389	general transcription factor IIF subunit 1 [Source:HGNC Symbol;Acc:HGNC:4652]	GTF2F1	32.0466	32.9376	29.2559	46.6262	48.4251	59.9418
ENSG00000119574	0.710413	2.50131	10.0987	0.00148372	0.00667473	zinc finger and BTB domain containing 45 [Source:HGNC Symbol;Acc:HGNC:23715]	ZBTB45	4.93999	4.0512	3.83622	5.91345	7.59326	7.47792
ENSG00000204956	0.710372	3.02845	15.5633	7.97865e-05	0.000576716	protocadherin gamma subfamily A, 1 [Source:HGNC Symbol;Acc:HGNC:8696]	PCDHGA1	4.65211	6.49701	7.34959	7.52009	11.2362	11.5209
ENSG00000175267	0.709751	-0.420932	4.27148	0.0387571	0.0940038	von Willebrand factor A domain containing 3A [Source:HGNC Symbol;Acc:HGNC:27088]	VWA3A	0.575756	0.0969702	1.03502	0.748644	0.271188	1.56349
ENSG00000187583	0.709499	0.309931	6.15712	0.0130884	0.0397163	pleckstrin homology domain containing N1 [Source:HGNC Symbol;Acc:HGNC:25284]	PLEKHN1	0.690908	0.872732	1.20594	1.51411	1.19323	1.78459
ENSG00000267508	0.708692	2.20761	7.33924	0.00674652	0.0230125	zinc finger protein 285 [Source:HGNC Symbol;Acc:HGNC:13079]	ZNF285	3.77696	2.73672	3.8932	5.43398	7.15936	4.55624
ENSG00000177453	0.708597	-1.75999	2.81728	0.0932541	0.187334	NIM1 serine/threonine protein kinase [Source:HGNC Symbol;Acc:HGNC:28646]	NIM1K	0.184242	0.161617	0.275372	0.361704	0.289267	0.355339
ENSG00000149016	0.70859	3.42203	12.7533	0.000355386	0.00200743	terminal uridylyl transferase 1, U6 snRNA-specific [Source:HGNC Symbol;Acc:HGNC:26184]	TUT1	12.4248	4.38521	8.4131	14.4093	9.01248	15.5007
ENSG00000164715	0.707924	7.12884	24.762	6.48629e-07	9.09386e-06	lemur tyrosine kinase 2 [Source:HGNC Symbol;Acc:HGNC:17880]	LMTK2	115.992	98.651	103.929	189.02	177.402	154.581
ENSG00000125834	0.707907	5.24838	21.6078	3.34497e-06	3.76691e-05	serine/threonine kinase 35 [Source:HGNC Symbol;Acc:HGNC:16254]	STK35	27.6248	29.4251	29.4933	48.5609	45.5415	47.2522
ENSG00000189143	0.707896	-0.692592	2.72293	0.0989164	0.196229	claudin 4 [Source:HGNC Symbol;Acc:HGNC:2046]	CLDN4	0.0690908	0.398655	1.0825	0.370116	0.488138	1.12129
ENSG00000166716	0.707286	5.46401	20.5772	5.72731e-06	6.04612e-05	zinc finger protein 592 [Source:HGNC Symbol;Acc:HGNC:28986]	ZNF592	32.5187	27.2486	41.1254	60.5813	45.1166	58.0624
ENSG00000165684	0.707283	3.52165	18.3018	1.88525e-05	0.000167932	small nuclear RNA activating complex polypeptide 4 [Source:HGNC Symbol;Acc:HGNC:11137]	SNAPC4	9.38483	7.90846	8.79292	14.9897	12.4746	15.1848
ENSG00000154118	0.707264	-0.8958	2.75777	0.0967828	0.192856	junctophilin 3 [Source:HGNC Symbol;Acc:HGNC:14203]	JPH3	0.264848	0.387881	0.47478	0.580409	1.02147	0.355339
ENSG00000225873	0.707004	-2.26125	1.92361	0.165459	0.288445	long intergenic non-protein coding RNA 694 [Source:HGNC Symbol;Acc:HGNC:44570]	LINC00694	0.207272	0.107745	0.113947	0.185058	0.198871	0.307961
ENSG00000204314	0.70686	-0.790189	3.8588	0.0494858	0.113775	proline rich transmembrane protein 1 [Source:HGNC Symbol;Acc:HGNC:13943]	PRRT1	0.564241	0.290911	0.38932	0.723409	0.397742	0.947572
ENSG00000140443	0.706573	7.43537	19.8643	8.31387e-06	8.41629e-05	insulin like growth factor 1 receptor [Source:HGNC Symbol;Acc:HGNC:5465]	IGF1R	99.1683	153.892	145.7	208.325	222.546	208.726
ENSG00000112320	0.706312	4.88919	19.837	8.43338e-06	8.51039e-05	sine oculis binding protein homolog [Source:HGNC Symbol;Acc:HGNC:29256]	SOBP	19.8406	23.1543	24.5271	33.8824	40.877	35.3523
ENSG00000170468	0.706226	3.97237	17.9467	2.27181e-05	0.000197428	ribosomal oxygenase 1 [Source:HGNC Symbol;Acc:HGNC:20968]	RIOX1	12.3327	11.2593	12.1069	18.5395	21.1075	18.6672
ENSG00000107554	0.706145	4.58951	20.5471	5.8181e-06	6.12985e-05	dynamin binding protein [Source:HGNC Symbol;Acc:HGNC:30373]	DNMBP	16.8466	17.9934	20.0262	29.8785	27.9143	31.6173
ENSG00000204928	0.705877	-2.98207	1.07514	0.299787	0.446103	glutaredoxin and cysteine rich domain containing 2 [Source:HGNC Symbol;Acc:HGNC:33862]	GRXCR2	0.241818	0.0215489	0.0379824	0.151411	0.090396	0.11055
ENSG00000127399	0.705144	2.09281	9.95728	0.00160215	0.00713576	leucine rich repeat containing 61 [Source:HGNC Symbol;Acc:HGNC:21704]	LRRC61	3.05151	2.88756	3.74127	5.68633	4.75483	5.2985
ENSG00000110583	0.704992	3.8169	16.5069	4.84733e-05	0.00037708	N(alpha)-acetyltransferase 40, NatD catalytic subunit [Source:HGNC Symbol;Acc:HGNC:25845]	NAA40	13.3921	10.031	8.81191	18.3712	19.399	14.4031
ENSG00000169962	0.704832	2.48566	11.8182	0.000586557	0.00307477	taste 1 receptor member 3 [Source:HGNC Symbol;Acc:HGNC:15661]	TAS1R3	4.17999	4.27746	4.22554	6.06486	7.59326	7.09889
ENSG00000176490	0.704797	7.08745	21.7685	3.07611e-06	3.51602e-05	DIRAS family GTPase 1 [Source:HGNC Symbol;Acc:HGNC:19127]	DIRAS1	107.252	67.6206	139.614	155.247	132.096	213.97
ENSG00000120784	0.704469	3.86302	9.97175	0.00158961	0.00709369	ZFP30 zinc finger protein [Source:HGNC Symbol;Acc:HGNC:29555]	ZFP30	8.65937	9.2014	15.9051	16.2346	21.2702	15.856
ENSG00000064393	0.70425	9.35942	22.7259	1.86833e-06	2.2768e-05	homeodomain interacting protein kinase 2 [Source:HGNC Symbol;Acc:HGNC:14402]	HIPK2	435.594	650.412	411.53	876.443	978.762	588.205
ENSG00000103056	0.70419	3.66049	18.6072	1.60615e-05	0.000147077	sphingomyelin phosphodiesterase 3 [Source:HGNC Symbol;Acc:HGNC:14240]	SMPD3	5.84968	16.7758	5.75433	9.19402	29.0442	9.12038
ENSG00000115705	0.704128	4.14149	16.1	6.0083e-05	0.000450596	thyroid peroxidase [Source:HGNC Symbol;Acc:HGNC:12015]	TPO	18.1363	8.93204	11.7081	35.6573	11.652	19.6305
ENSG00000184923	0.70407	3.10458	15.5322	8.11099e-05	0.000584173	NUT family member 2A [Source:HGNC Symbol;Acc:HGNC:23438]	NUTM2A	7.05877	5.88286	6.49499	12.9288	8.62377	10.447
ENSG00000137413	0.703949	5.14599	9.11326	0.00253763	0.0103977	TATA-box binding protein associated factor 8 [Source:HGNC Symbol;Acc:HGNC:17300]	TAF8	39.0478	15.0088	30.0156	46.1972	44.2307	37.7923
ENSG00000134259	0.703767	1.51396	8.99408	0.00270856	0.010983	nerve growth factor [Source:HGNC Symbol;Acc:HGNC:7808]	NGF	1.77333	2.32729	2.33592	2.75905	4.01358	3.7587
ENSG00000181444	0.703656	1.35672	7.71541	0.00547513	0.0194457	zinc finger protein 467 [Source:HGNC Symbol;Acc:HGNC:23154]	ZNF467	1.76181	1.90708	2.02256	2.77587	2.47685	4.24038
ENSG00000181619	0.703217	3.45984	17.0186	3.70145e-05	0.000299423	G protein-coupled receptor 135 [Source:HGNC Symbol;Acc:HGNC:19991]	GPR135	8.6824	9.6216	6.4665	13.7532	17.8894	9.45992
ENSG00000166091	0.703188	2.73813	9.49826	0.00205667	0.00877014	CKLF like MARVEL transmembrane domain containing 5 [Source:HGNC Symbol;Acc:HGNC:19176]	CMTM5	5.23938	7.21889	1.97508	12.4914	10.5763	2.40051
ENSG00000119729	0.703087	6.61917	19.5682	9.70713e-06	9.59634e-05	ras homolog family member Q [Source:HGNC Symbol;Acc:HGNC:17736]	RHOQ	83.6228	79.0954	62.3386	108.764	131.038	124.803
ENSG00000133069	0.703035	1.5483	7.81395	0.00518446	0.0185947	transmembrane and coiled-coil domain family 2 [Source:HGNC Symbol;Acc:HGNC:24239]	TMCC2	2.06121	2.05792	2.44037	2.93569	4.5198	3.37178
ENSG00000129116	0.702931	8.59244	25.5542	4.30133e-07	6.38821e-06	palladin, cytoskeletal associated protein [Source:HGNC Symbol;Acc:HGNC:17068]	PALLD	312.244	370.545	193.549	556.882	587.248	295.358
ENSG00000114812	0.702814	2.06469	8.96372	0.00275394	0.0111248	vasoactive intestinal peptide receptor 1 [Source:HGNC Symbol;Acc:HGNC:12694]	VIPR1	3.31636	4.23437	2.03206	6.48544	5.28816	3.60077
ENSG00000022567	0.702813	4.72715	21.0529	4.46781e-06	4.8573e-05	solute carrier family 45 member 4 [Source:HGNC Symbol;Acc:HGNC:29196]	SLC45A4	16.6278	21.7644	22.0678	27.54	35.8058	34.9338
ENSG00000101638	0.702656	4.46747	19.4988	1.00665e-05	9.8981e-05	ST8 alpha-N-acetyl-neuraminide alpha-2,8-sialyltransferase 5 [Source:HGNC Symbol;Acc:HGNC:17827]	ST8SIA5	17.8945	17.6701	14.6137	32.3347	28.303	21.7626
ENSG00000130653	0.702182	4.35312	13.0704	0.000300001	0.00174819	patatin like phospholipase domain containing 7 [Source:HGNC Symbol;Acc:HGNC:24768]	PNPLA7	14.5436	13.1449	17.4909	30.1476	14.617	32.478
ENSG00000177283	0.701915	3.75113	17.0289	3.68147e-05	0.000298259	frizzled class receptor 8 [Source:HGNC Symbol;Acc:HGNC:4046]	FZD8	8.59028	9.48153	12.1449	11.9615	15.4396	22.9786
ENSG00000269699	0.701861	-1.07123	3.48831	0.0618037	0.135821	zinc finger imprinted 2 [Source:HGNC Symbol;Acc:HGNC:12875]	ZIM2	0.368484	0.247813	0.417806	0.445822	0.596613	0.631714
ENSG00000197410	0.701779	-1.54601	2.61786	0.105667	0.206149	dachsous cadherin-related 2 [Source:HGNC Symbol;Acc:HGNC:23111]	DCHS2	0.184242	0.441753	0.142434	0.277587	0.479099	0.402718
ENSG00000169515	0.70163	5.87425	21.3412	3.84388e-06	4.25695e-05	coiled-coil domain containing 8 [Source:HGNC Symbol;Acc:HGNC:25367]	CCDC8	47.2696	45.3174	41.1919	68.1518	81.6366	68.2173
ENSG00000122877	0.701594	2.58234	11.4318	0.000721986	0.0036625	early growth response 2 [Source:HGNC Symbol;Acc:HGNC:3239]	EGR2	1.07091	4.81619	8.1947	2.02723	7.83733	11.7736
ENSG00000005513	0.700937	1.95865	9.55315	0.00199606	0.0085618	SRY-box 8 [Source:HGNC Symbol;Acc:HGNC:11203]	SOX8	2.02666	3.84649	2.99111	3.36469	5.58647	5.33799
ENSG00000070731	0.700759	3.04313	13.1546	0.000286817	0.0016836	ST6 N-acetylgalactosaminide alpha-2,6-sialyltransferase 2 [Source:HGNC Symbol;Acc:HGNC:10867]	ST6GALNAC2	4.92847	7.98388	6.0487	9.16879	10.1243	11.0313
ENSG00000108825	0.700188	2.79415	3.11004	0.0778112	0.162678	PTGES3L-AARSD1 readthrough [Source:HGNC Symbol;Acc:HGNC:43946]	PTGES3L-AARSD1	1.92303	7.33741	7.72942	10.01	7.77405	6.66459
ENSG00000178919	0.700117	-2.91061	1.1214	0.289617	0.435744	forkhead box E1 [Source:HGNC Symbol;Acc:HGNC:3806]	FOXE1	0.0230303	0.161617	0.0854604	0.109352	0.090396	0.197411
ENSG00000180447	0.700099	6.14514	19.8569	8.3462e-06	8.44368e-05	growth arrest specific 1 [Source:HGNC Symbol;Acc:HGNC:4165]	GAS1	25.8399	101.97	22.0963	35.8592	204.864	33.8915
ENSG00000109118	0.700045	4.55217	14.6566	0.000128981	0.000863856	PHD finger protein 12 [Source:HGNC Symbol;Acc:HGNC:20816]	PHF12	14.7278	19.5126	19.3615	32.7132	24.8227	29.4458
ENSG00000102935	0.699978	3.88801	12.9852	0.000313955	0.00181367	zinc finger protein 423 [Source:HGNC Symbol;Acc:HGNC:16762]	ZNF423	7.33514	13.5866	13.1229	14.9813	15.5752	24.0367
ENSG00000101126	0.699901	5.46349	18.6307	1.58644e-05	0.000145439	activity dependent neuroprotector homeobox [Source:HGNC Symbol;Acc:HGNC:15766]	ADNP	27.9818	37.2904	33.8043	36.877	70.8343	57.7861
ENSG00000113504	0.69955	7.70297	25.5426	4.32731e-07	6.42084e-06	solute carrier family 12 member 7 [Source:HGNC Symbol;Acc:HGNC:10915]	SLC12A7	153.439	137.87	185.61	256.204	224.553	292.334
ENSG00000179403	0.699469	3.97236	18.3544	1.83398e-05	0.000164187	von Willebrand factor A domain containing 1 [Source:HGNC Symbol;Acc:HGNC:30910]	VWA1	10.2024	11.4102	14.0155	15.5112	18.4046	24.4473
ENSG00000141965	0.699441	7.52162	23.2589	1.41596e-06	1.79943e-05	fem-1 homolog A [Source:HGNC Symbol;Acc:HGNC:16934]	FEM1A	171.023	127.225	123.5	248.886	234.722	197
ENSG00000080644	0.699042	0.118806	5.53889	0.0185983	0.0526476	cholinergic receptor nicotinic alpha 3 subunit [Source:HGNC Symbol;Acc:HGNC:1957]	CHRNA3	0.253333	1.52997	0.71217	0.555174	2.35029	0.979157
ENSG00000206432	0.698938	-0.191236	4.58955	0.0321674	0.0810808	transmembrane protein 200C [Source:HGNC Symbol;Acc:HGNC:37208]	TMEM200C	0.506666	0.258587	1.14897	0.563586	0.587574	1.9899
ENSG00000198369	0.698916	4.96622	18.6355	1.58243e-05	0.000145237	sprouty related EVH1 domain containing 2 [Source:HGNC Symbol;Acc:HGNC:17722]	SPRED2	22.7309	31.5261	17.4719	42.8662	45.0805	27.7323
ENSG00000138834	0.698868	6.64306	24.6919	6.72666e-07	9.38978e-06	mitogen-activated protein kinase 8 interacting protein 3 [Source:HGNC Symbol;Acc:HGNC:6884]	MAPK8IP3	92.3513	66.1876	69.9541	149.308	104.552	117.151
ENSG00000162738	0.698232	1.68876	7.84357	0.00510017	0.0183591	VANGL planar cell polarity protein 2 [Source:HGNC Symbol;Acc:HGNC:15511]	VANGL2	1.68121	3.0815	2.66826	3.69275	3.9503	4.09825
ENSG00000122574	0.697485	2.95017	12.0591	0.000515391	0.00275949	WAS/WASL interacting protein family member 3 [Source:HGNC Symbol;Acc:HGNC:22004]	WIPF3	5.44665	6.48623	5.57392	11.6502	9.17519	7.87274
ENSG00000105325	0.697384	5.24532	20.8905	4.86297e-06	5.23014e-05	fizzy and cell division cycle 20 related 1 [Source:HGNC Symbol;Acc:HGNC:24824]	FZR1	27.4636	29.4035	29.6927	41.0408	50.4319	49.3843
ENSG00000095637	0.69721	9.4985	24.5103	7.39141e-07	1.02022e-05	sorbin and SH3 domain containing 1 [Source:HGNC Symbol;Acc:HGNC:14565]	SORBS1	561.581	592.725	493.581	1061.8	883.132	746.955
ENSG00000049239	0.697159	7.41034	25.0825	5.49288e-07	7.81042e-06	hexose-6-phosphate dehydrogenase/glucose 1-dehydrogenase [Source:HGNC Symbol;Acc:HGNC:4795]	H6PD	131.86	149.657	107.405	217.813	243.391	170.389
ENSG00000170703	0.696727	-2.03974	2.36038	0.124452	0.233693	tubulin tyrosine ligase like 6 [Source:HGNC Symbol;Acc:HGNC:26664]	TTLL6	0.230303	0.150843	0.113947	0.454233	0.21695	0.165825
ENSG00000168763	0.696661	3.67047	17.7272	2.54954e-05	0.00021825	cyclin and CBS domain divalent metal cation transport mediator 3 [Source:HGNC Symbol;Acc:HGNC:104]	CNNM3	9.75331	9.61083	9.64753	16.4618	13.7402	17.0089
ENSG00000220008	0.696195	0.257888	5.94311	0.0147749	0.0439028	leucine rich repeat and Ig domain containing 3 [Source:HGNC Symbol;Acc:HGNC:21206]	LINGO3	0.978786	1.00203	0.702674	1.20288	1.77176	1.37398
ENSG00000120907	0.695584	5.87445	22.2073	2.44742e-06	2.86486e-05	adrenoceptor alpha 1A [Source:HGNC Symbol;Acc:HGNC:277]	ADRA1A	43.1817	45.339	45.7498	70.3473	76.5202	70.6888
ENSG00000166133	0.695167	3.52261	15.0456	0.000104945	0.000726471	RNA pseudouridylate synthase domain containing 2 [Source:HGNC Symbol;Acc:HGNC:24180]	RPUSD2	11.0545	6.80947	8.68847	14.2747	13.1978	14.7663
ENSG00000203867	0.694824	8.76542	24.9335	5.93414e-07	8.3563e-06	RNA binding motif protein 20 [Source:HGNC Symbol;Acc:HGNC:27424]	RBM20	339.017	308.71	348.469	593.515	518.999	502.118
ENSG00000170265	0.694803	4.30292	16.0867	6.05064e-05	0.000453091	zinc finger protein 282 [Source:HGNC Symbol;Acc:HGNC:13076]	ZNF282	16.7315	14.8364	13.5882	21.3406	26.4951	25.2765
ENSG00000173334	0.694566	5.68254	20.3207	6.54895e-06	6.79268e-05	tribbles pseudokinase 1 [Source:HGNC Symbol;Acc:HGNC:16891]	TRIB1	39.0478	35.0386	43.8032	61.4645	65.2568	63.3688
ENSG00000173175	0.694268	8.13753	25.5197	4.37883e-07	6.48207e-06	adenylate cyclase 5 [Source:HGNC Symbol;Acc:HGNC:236]	ADCY5	206.363	158.816	282.171	343.56	260.105	438.426
ENSG00000136002	0.694079	2.10699	9.22154	0.00239184	0.00989418	Rho guanine nucleotide exchange factor 4 [Source:HGNC Symbol;Acc:HGNC:684]	ARHGEF4	2.52181	3.95423	3.27598	3.76004	5.55935	6.60142
ENSG00000156030	0.69403	5.95358	22.0142	2.7064e-06	3.13141e-05	ELM2 and Myb/SANT domain containing 1 [Source:HGNC Symbol;Acc:HGNC:19853]	ELMSAN1	33.3017	47.9572	60.6009	55.6184	72.4072	101.761
ENSG00000146700	0.693724	-0.661453	3.63969	0.0564175	0.126164	scavenger receptor cysteine rich family member with 4 domains [Source:HGNC Symbol;Acc:HGNC:14461]	SSC4D	0.736968	0.420204	0.294364	0.748644	0.714128	0.750161
ENSG00000101181	0.693471	4.72308	20.2462	6.80878e-06	7.03033e-05	mitochondrial ribosome associated GTPase 2 [Source:HGNC Symbol;Acc:HGNC:16239]	MTG2	21.4066	19.2971	19.8078	33.0497	33.1392	31.6015
ENSG00000185262	0.693323	3.63079	18.0997	2.09631e-05	0.000183771	UBA like domain containing 2 [Source:HGNC Symbol;Acc:HGNC:28438]	UBALD2	10.2945	8.37176	9.69501	16.6468	14.6351	14.5136
ENSG00000196739	0.693319	4.61779	18.6885	1.53907e-05	0.000141419	collagen type XXVII alpha 1 chain [Source:HGNC Symbol;Acc:HGNC:22986]	COL27A1	20.1284	17.6594	18.1461	34.3956	24.5696	32.2411
ENSG00000128266	0.693094	2.35779	10.9957	0.000913242	0.00445772	G protein subunit alpha z [Source:HGNC Symbol;Acc:HGNC:4395]	GNAZ	4.19151	3.66332	3.83622	6.40133	6.63506	5.86705
ENSG00000082497	0.692673	1.63977	2.8952	0.088844	0.180401	SERTA domain containing 4 [Source:HGNC Symbol;Acc:HGNC:25236]	SERTAD4	2.31454	0.786536	4.44394	1.85899	3.80567	5.2985
ENSG00000141696	0.692498	2.58403	11.9562	0.000544648	0.00289102	prolyl 3-hydroxylase family member 4 (non-enzymatic) [Source:HGNC Symbol;Acc:HGNC:16946]	P3H4	3.70787	5.53808	4.34898	5.38351	9.43734	7.39895
ENSG00000138172	0.692359	3.05962	14.5971	0.000133118	0.000885885	calcium homeostasis modulator 2 [Source:HGNC Symbol;Acc:HGNC:23493]	CALHM2	5.05514	6.0337	7.73891	7.32662	9.66333	14.0162
ENSG00000187792	0.692315	3.63715	17.312	3.17173e-05	0.000261859	zinc finger protein 70 [Source:HGNC Symbol;Acc:HGNC:13140]	ZNF70	6.87453	11.2916	10.5591	12.7185	16.3074	16.7246
ENSG00000007402	0.692164	1.91249	5.50956	0.0189128	0.0533495	calcium voltage-gated channel auxiliary subunit alpha2delta 2 [Source:HGNC Symbol;Acc:HGNC:1400]	CACNA2D2	2.80969	3.27544	2.30743	6.06486	2.83843	5.11689
ENSG00000126803	0.691673	6.67182	22.2331	2.41479e-06	2.8308e-05	heat shock protein family A (Hsp70) member 2 [Source:HGNC Symbol;Acc:HGNC:5235]	HSPA2	100.815	92.682	39.2643	146.053	170.866	61.9396
ENSG00000182759	0.691181	-0.802389	3.92529	0.0475651	0.110292	MAF bZIP transcription factor A [Source:HGNC Symbol;Acc:HGNC:23145]	MAFA	0.575756	0.290911	0.379824	1.01782	0.587574	0.450096
ENSG00000151617	0.691126	4.897	13.4686	0.000242594	0.00147264	endothelin receptor type A [Source:HGNC Symbol;Acc:HGNC:3179]	EDNRA	28.903	26.0634	14.9081	38.6183	35.625	34.5074
ENSG00000166189	0.690977	4.18878	16.1645	5.8073e-05	0.000439179	HPS6, biogenesis of lysosomal organelles complex 2 subunit 3 [Source:HGNC Symbol;Acc:HGNC:18817]	HPS6	13.9794	14.19	13.2369	20.1966	28.3934	19.2673
ENSG00000088367	0.690937	3.80909	9.16861	0.00246201	0.0101293	erythrocyte membrane protein band 4.1 like 1 [Source:HGNC Symbol;Acc:HGNC:3378]	EPB41L1	8.0721	14.1253	10.1983	20.5751	14.382	16.5746
ENSG00000249222	0.690903	-1.26204	3.46414	0.0627131	0.137292	ATP synthase, H+ transporting, mitochondrial Fo complex subunit G2 [Source:HGNC Symbol;Acc:HGNC:13213]	ATP5L2	0.276363	0.387881	0.246886	0.454233	0.551415	0.450096
ENSG00000116690	0.690806	6.83343	8.30121	0.00396187	0.015027	proteoglycan 4 [Source:HGNC Symbol;Acc:HGNC:9364]	PRG4	34.8563	201.644	58.1795	104.205	202.948	82.3045
ENSG00000034053	0.690281	0.753391	7.02144	0.00805393	0.0266877	amyloid beta precursor protein binding family A member 2 [Source:HGNC Symbol;Acc:HGNC:579]	APBA2	1.01333	1.61617	1.12048	1.3627	2.97403	1.87935
ENSG00000005007	0.690262	6.34814	24.9662	5.83433e-07	8.24473e-06	UPF1, RNA helicase and ATPase [Source:HGNC Symbol;Acc:HGNC:9962]	UPF1	66.8568	61.7593	58.3884	105.5	102.102	94.0307
ENSG00000184261	0.690062	0.609168	6.06895	0.0137578	0.041426	potassium two pore domain channel subfamily K member 12 [Source:HGNC Symbol;Acc:HGNC:6274]	KCNK12	1.05939	1.26061	1.09199	1.71599	1.51865	2.33734
ENSG00000119715	0.689866	2.51411	10.5334	0.00117238	0.00546782	estrogen related receptor beta [Source:HGNC Symbol;Acc:HGNC:3473]	ESRRB	3.81151	4.57915	4.65284	7.32662	7.61134	6.12763
ENSG00000139722	0.689744	4.67325	19.2963	1.11921e-05	0.000107784	VPS37B, ESCRT-I subunit [Source:HGNC Symbol;Acc:HGNC:25754]	VPS37B	19.1036	18.3705	21.0233	33.6637	28.755	31.9963
ENSG00000134030	0.688754	6.00015	22.5165	2.08346e-06	2.49346e-05	cap binding complex dependent translation initiation factor [Source:HGNC Symbol;Acc:HGNC:23925]	CTIF	45.0587	62.9983	38.6186	70.5492	104.245	62.4213
ENSG00000179922	0.688057	3.46147	14.1022	0.000173142	0.00111029	zinc finger protein 784 [Source:HGNC Symbol;Acc:HGNC:33111]	ZNF784	9.96058	7.28354	8.10924	12.5419	14.4724	13.5661
ENSG00000197822	0.687618	0.969594	3.65914	0.0557623	0.125065	occludin [Source:HGNC Symbol;Acc:HGNC:8104]	OCLN	1.23212	1.0559	1.82315	0.87482	3.14578	3.43495
ENSG00000162068	0.687398	-0.409208	4.90154	0.0268327	0.0700772	netrin 3 [Source:HGNC Symbol;Acc:HGNC:8030]	NTN3	0.518181	0.872732	0.303859	0.782291	1.38306	0.536957
ENSG00000116044	0.687386	5.94931	7.32547	0.0067984	0.023155	nuclear factor, erythroid 2 like 2 [Source:HGNC Symbol;Acc:HGNC:7782]	NFE2L2	23.6521	62.535	63.2407	75.9243	76.4569	68.7542
ENSG00000171532	0.687296	-3.37774	0.952547	0.329072	0.477013	neuronal differentiation 2 [Source:HGNC Symbol;Acc:HGNC:7763]	NEUROD2	0.0115151	0.118519	0.0569736	0.0588821	0.0813564	0.126343
ENSG00000196600	0.686899	-3.28803	0.822945	0.364321	0.512666	solute carrier family 22 member 25 [Source:HGNC Symbol;Acc:HGNC:32935]	SLC22A25	0.0345454	0.118519	0.0379824	0.151411	0.045198	0.102654
ENSG00000083844	0.68688	3.24053	13.5633	0.000230656	0.00141348	zinc finger protein 264 [Source:HGNC Symbol;Acc:HGNC:13057]	ZNF264	5.64241	9.53541	6.65641	11.339	13.7673	9.60995
ENSG00000257704	0.686873	2.64543	11.817	0.000586934	0.00307565	InaF motif containing 1 [Source:HGNC Symbol;Acc:HGNC:27406]	INAFM1	4.32969	4.48218	5.3935	6.44339	6.87009	9.83895
ENSG00000112137	0.686708	6.90187	20.236	6.84541e-06	7.05906e-05	phosphatase and actin regulator 1 [Source:HGNC Symbol;Acc:HGNC:20990]	PHACTR1	100.988	56.5875	113.083	197.171	81.2479	168.226
ENSG00000178175	0.686583	3.94323	17.7292	2.54693e-05	0.000218143	zinc finger protein 366 [Source:HGNC Symbol;Acc:HGNC:18316]	ZNF366	13.2309	10.5482	11.5846	19.8853	17.4464	19.4331
ENSG00000008300	0.686518	1.38897	7.772	0.00530624	0.0189466	cadherin EGF LAG seven-pass G-type receptor 3 [Source:HGNC Symbol;Acc:HGNC:3230]	CELSR3	1.61212	2.37038	1.9466	2.37211	3.32657	3.91663
ENSG00000163909	0.686486	5.48745	17.7035	2.58146e-05	0.000220511	hes related family bHLH transcription factor with YRPW motif-like [Source:HGNC Symbol;Acc:HGNC:4882]	HEYL	19.9097	69.1182	19.2381	38.3238	90.5948	31.87
ENSG00000184792	0.686462	3.9819	17.7669	2.49693e-05	0.000214319	oxysterol binding protein 2 [Source:HGNC Symbol;Acc:HGNC:8504]	OSBP2	12.2521	9.06133	15.041	20.7686	14.7436	22.7496
ENSG00000262576	0.686441	5.23502	20.5631	5.76977e-06	6.08694e-05	protocadherin gamma subfamily A, 4 [Source:HGNC Symbol;Acc:HGNC:8702]	PCDHGA4	28.9951	26.5698	30.9556	47.888	42.2149	49.1711
ENSG00000168101	0.686423	4.03798	2.44714	0.117739	0.22379	nudix hydrolase 16 like 1 [Source:HGNC Symbol;Acc:HGNC:28154]	NUDT16L1	7.15089	23.9732	9.20123	24.7305	10.1424	23.1918
ENSG00000186648	0.686381	-1.39221	2.54321	0.110769	0.213659	capping protein regulator and myosin 1 linker 3 [Source:HGNC Symbol;Acc:HGNC:20272]	CARMIL3	0.276363	0.290911	0.227894	0.403763	0.280227	0.655404
ENSG00000186197	0.686146	0.665394	6.7626	0.00930882	0.0300693	EDAR associated death domain [Source:HGNC Symbol;Acc:HGNC:14341]	EDARADD	1.08242	1.89631	0.626709	1.53093	3.13674	1.12129
ENSG00000178307	0.686075	3.62336	14.9475	0.000110543	0.000758004	transmembrane protein 11 [Source:HGNC Symbol;Acc:HGNC:16823]	TMEM11	10.8703	8.95358	8.4131	14.2242	18.0069	13.3213
ENSG00000130943	0.685809	2.60007	11.6814	0.000631287	0.00327921	polycystin (PKD) family receptor for egg jelly [Source:HGNC Symbol;Acc:HGNC:9015]	PKDREJ	4.92847	5.12865	3.72227	7.65467	9.31078	5.48802
ENSG00000139044	0.685649	6.01457	21.5926	3.37145e-06	3.79407e-05	beta-1,4-N-acetyl-galactosaminyltransferase 3 [Source:HGNC Symbol;Acc:HGNC:24137]	B4GALNT3	42.4678	34.586	71.6728	62.844	60.0681	116.054
ENSG00000116525	0.68506	2.4811	11.1813	0.000826258	0.00410567	tripartite motif containing 62 [Source:HGNC Symbol;Acc:HGNC:25574]	TRIM62	3.82302	4.5145	4.43444	6.39292	6.45427	7.70692
ENSG00000198492	0.685059	4.87516	6.3179	0.0119525	0.0369197	YTH N6-methyladenosine RNA binding protein 2 [Source:HGNC Symbol;Acc:HGNC:31675]	YTHDF2	16.1097	15.2674	31.6488	49.2675	12.9357	50.624
ENSG00000182575	0.685004	2.32709	4.89301	0.0269656	0.0703327	neurexophilin 3 [Source:HGNC Symbol;Acc:HGNC:8077]	NXPH3	1.57757	6.163	4.54839	5.4508	7.43959	4.76944
ENSG00000138080	0.684677	5.45546	20.4934	5.98376e-06	6.28373e-05	elastin microfibril interfacer 1 [Source:HGNC Symbol;Acc:HGNC:19880]	EMILIN1	20.6006	49.9828	29.6453	30.3579	81.0852	51.4452
ENSG00000065320	0.684589	5.52168	21.1414	4.2661e-06	4.67608e-05	netrin 1 [Source:HGNC Symbol;Acc:HGNC:8029]	NTN1	39.8078	32.1079	33.7948	63.0796	54.7528	51.9348
ENSG00000164509	0.684512	0.617478	5.64038	0.0175514	0.0503962	interleukin 31 receptor A [Source:HGNC Symbol;Acc:HGNC:18969]	IL31RA	2.02666	1.52997	0.161425	2.7254	2.27798	0.394821
ENSG00000114554	0.683723	6.68033	23.5333	1.22772e-06	1.58735e-05	plexin A1 [Source:HGNC Symbol;Acc:HGNC:9099]	PLXNA1	77.1398	93.7702	65.5481	123.551	146.993	108.205
ENSG00000198064	0.68368	3.46074	7.56715	0.00594418	0.02078	nuclear pore complex interacting protein family, member B13 [Source:HGNC Symbol;Acc:HGNC:41989]	NPIPB13	7.73816	8.16705	8.18521	19.9863	7.34919	14.4426
ENSG00000112624	0.683549	5.1409	16.5955	4.62618e-05	0.000361543	GLTSCR1 like [Source:HGNC Symbol;Acc:HGNC:21111]	GLTSCR1L	22.6618	32.3126	26.6446	45.4822	43.7697	40.6587
ENSG00000187189	0.683419	5.48196	19.5608	9.74499e-06	9.6219e-05	TSPY like 4 [Source:HGNC Symbol;Acc:HGNC:21559]	TSPYL4	31.5399	35.3187	35.9503	56.6867	58.215	50.2766
ENSG00000144230	0.682876	5.22738	9.37989	0.00219378	0.00922471	G protein-coupled receptor 17 [Source:HGNC Symbol;Acc:HGNC:4471]	GPR17	39.7617	18.1119	19.2476	95.9947	17.3018	34.1757
ENSG00000158008	0.68286	3.3009	15.3934	8.72939e-05	0.000620899	exostosin like glycosyltransferase 1 [Source:HGNC Symbol;Acc:HGNC:3515]	EXTL1	7.34665	10.699	4.25403	11.4231	18.8928	6.38821
ENSG00000162458	0.682779	4.04004	14.9029	0.000113189	0.000772838	filamin binding LIM protein 1 [Source:HGNC Symbol;Acc:HGNC:24686]	FBLIM1	12.5745	14.9981	10.4831	20.3227	19.2905	20.8703
ENSG00000182253	0.682224	10.2307	24.9487	5.88764e-07	8.30541e-06	synemin [Source:HGNC Symbol;Acc:HGNC:24466]	SYNM	1033.87	878.766	850.312	1619.33	1577.99	1249.17
ENSG00000167566	0.682008	5.64538	21.0969	4.36623e-06	4.76787e-05	NCK associated protein 5 like [Source:HGNC Symbol;Acc:HGNC:29321]	NCKAP5L	36.0539	40.3504	38.742	55.8791	66.3145	62.8082
ENSG00000142444	0.681833	3.67844	17.0978	3.55039e-05	0.000288368	translocase of inner mitochondrial membrane 29 [Source:HGNC Symbol;Acc:HGNC:25152]	TIMM29	10.4672	8.40409	10.6351	15.3346	14.9876	16.8194
ENSG00000107815	0.681816	2.89659	11.9061	0.000559503	0.00296202	twinkle mtDNA helicase [Source:HGNC Symbol;Acc:HGNC:1160]	TWNK	5.07817	6.06603	5.88727	9.36226	10.504	7.62005
ENSG00000140481	0.68144	-3.7149	0.82548	0.363583	0.512021	coiled-coil domain containing 33 [Source:HGNC Symbol;Acc:HGNC:26552]	CCDC33	0.0806059	0.0323234	0.0189912	0.092529	0.0271188	0.0868607
ENSG00000256453	0.681241	-2.35565	1.76339	0.184202	0.312211	DND microRNA-mediated repression inhibitor 1 [Source:HGNC Symbol;Acc:HGNC:23799]	DND1	0.161212	0.0969702	0.123443	0.252352	0.090396	0.307961
ENSG00000169564	0.681239	6.18006	23.1231	1.51955e-06	1.91588e-05	poly(rC) binding protein 1 [Source:HGNC Symbol;Acc:HGNC:8647]	PCBP1	50.3787	52.8811	64.1428	88.2559	83.0196	96.1864
ENSG00000015676	0.681224	6.86197	22.5225	2.07699e-06	2.48758e-05	NudC domain containing 3 [Source:HGNC Symbol;Acc:HGNC:22208]	NUDCD3	101.31	91.6369	75.8983	155.331	139.707	133.884
ENSG00000175699	0.680208	-1.48883	2.67393	0.102004	0.200739	long intergenic non-protein coding RNA 521 [Source:HGNC Symbol;Acc:HGNC:19860]	LINC00521	0.241818	0.344783	0.189912	0.471057	0.343505	0.410614
ENSG00000188803	0.680103	1.44535	7.88052	0.004997	0.0180842	shisa family member 6 [Source:HGNC Symbol;Acc:HGNC:34491]	SHISA6	1.78484	2.30574	2.13651	3.48246	3.09154	3.37178
ENSG00000165810	0.67998	6.56532	22.0597	2.64296e-06	3.06909e-05	butyrophilin like 9 [Source:HGNC Symbol;Acc:HGNC:24176]	BTNL9	85.8913	40.3935	88.4705	139.223	58.0794	155.954
ENSG00000119771	0.67975	3.5505	13.4542	0.000244453	0.00148216	kelch like family member 29 [Source:HGNC Symbol;Acc:HGNC:29404]	KLHL29	6.33332	10.8283	10.0558	12.5419	13.2159	17.1431
ENSG00000160801	0.679703	3.3476	15.7189	7.34881e-05	0.000537493	parathyroid hormone 1 receptor [Source:HGNC Symbol;Acc:HGNC:9608]	PTH1R	9.47695	5.63505	8.17571	16.3524	8.79553	12.4685
ENSG00000205502	0.679382	0.441805	5.87625	0.0153464	0.0452571	C2 calcium dependent domain containing 4B [Source:HGNC Symbol;Acc:HGNC:33628]	C2CD4B	0.460605	0.527949	2.1555	0.731821	0.985316	3.07171
ENSG00000070366	0.67924	5.35413	19.4163	1.05105e-05	0.000102577	SMG6, nonsense mediated mRNA decay factor [Source:HGNC Symbol;Acc:HGNC:17809]	SMG6	29.3751	30.8258	34.1462	51.4882	47.7019	51.7058
ENSG00000213689	0.679218	-2.7684	1.11939	0.290049	0.436079	three prime repair exonuclease 1 [Source:HGNC Symbol;Acc:HGNC:12269]	TREX1	0.0230303	0.0215489	0.246886	0.0841173	0.0180792	0.33165
ENSG00000185669	0.679161	1.53246	8.26028	0.00405219	0.0152899	snail family transcriptional repressor 3 [Source:HGNC Symbol;Acc:HGNC:18411]	SNAI3	2.61393	1.62694	2.3834	4.28998	2.80227	3.47443
ENSG00000152475	0.679117	0.026487	5.4493	0.0195762	0.0548457	zinc finger protein 837 [Source:HGNC Symbol;Acc:HGNC:25164]	ZNF837	0.633332	0.969702	0.693179	0.950526	1.33786	1.37398
ENSG00000101191	0.679092	6.7402	23.0636	1.56729e-06	1.96371e-05	death inducer-obliterator 1 [Source:HGNC Symbol;Acc:HGNC:2680]	DIDO1	79.7307	82.9957	83.7512	125.789	136.823	132.178
ENSG00000197361	0.679055	3.78138	16.1814	5.7556e-05	0.000435886	F-box and leucine rich repeat protein 22 [Source:HGNC Symbol;Acc:HGNC:27537]	FBXL22	10.2485	10.2573	11.0054	16.5375	14.5176	19.7569
ENSG00000198835	0.678678	1.04177	6.71313	0.00957058	0.0307352	gap junction protein gamma 2 [Source:HGNC Symbol;Acc:HGNC:17494]	GJC2	1.18606	1.50843	1.89912	1.47205	3.0825	3.03223
ENSG00000103126	0.67839	3.98149	17.4565	2.93954e-05	0.000245857	axin 1 [Source:HGNC Symbol;Acc:HGNC:903]	AXIN1	12.8509	13.0587	10.5401	20.3564	20.0137	17.7986
ENSG00000090020	0.678189	4.16343	13.7069	0.000213669	0.0013247	solute carrier family 9 member A1 [Source:HGNC Symbol;Acc:HGNC:11071]	SLC9A1	7.20847	21.4412	14.2149	15.4692	28.2126	20.8071
ENSG00000130147	0.677664	4.54087	18.3741	1.81504e-05	0.000162764	SH3 domain binding protein 4 [Source:HGNC Symbol;Acc:HGNC:10826]	SH3BP4	14.0139	21.5489	18.4405	25.0081	31.7109	28.7746
ENSG00000223510	0.677365	-1.43345	2.22356	0.13592	0.248956	CMT1A duplicated region transcript 15 [Source:HGNC Symbol;Acc:HGNC:14395]	CDRT15	0.299393	0.474077	0.094956	0.546762	0.388703	0.300064
ENSG00000167363	0.67735	4.23995	14.7776	0.000120962	0.000817224	fructosamine 3 kinase [Source:HGNC Symbol;Acc:HGNC:24822]	FN3K	12.3097	11.8627	18.7538	23.679	14.9063	31.6568
ENSG00000254470	0.67722	4.2706	18.091	2.10595e-05	0.000184515	adaptor related protein complex 5 beta 1 subunit [Source:HGNC Symbol;Acc:HGNC:25104]	AP5B1	14.4169	14.8041	15.2309	22.1229	25.5007	23.5629
ENSG00000050820	0.677027	6.23056	22.537	2.06136e-06	2.47626e-05	BCAR1, Cas family scaffolding protein [Source:HGNC Symbol;Acc:HGNC:971]	BCAR1	67.755	51.5343	54.6662	97.6434	89.2841	89.4981
ENSG00000148408	0.676912	-1.26181	2.49978	0.113862	0.218389	calcium voltage-gated channel subunit alpha1 B [Source:HGNC Symbol;Acc:HGNC:1389]	CACNA1B	0.241818	0.334009	0.294364	0.765467	0.406782	0.315857
ENSG00000198569	0.676699	0.149636	5.68421	0.0171182	0.0493647	solute carrier family 34 member 3 [Source:HGNC Symbol;Acc:HGNC:20305]	SLC34A3	0.829089	0.614145	1.04452	1.09352	1.10283	1.80039
ENSG00000160282	0.676671	-0.177475	4.35869	0.0368207	0.0902633	formimidoyltransferase cyclodeaminase [Source:HGNC Symbol;Acc:HGNC:3974]	FTCD	1.23212	0.344783	0.446293	1.64029	0.44294	1.05812
ENSG00000167210	0.676601	1.73748	8.63453	0.0032985	0.0129238	lipoxygenase homology domains 1 [Source:HGNC Symbol;Acc:HGNC:26521]	LOXHD1	3.01696	1.88553	2.73473	4.5928	3.01019	4.59572
ENSG00000058453	0.676436	4.78866	18.0713	2.12789e-05	0.000186234	ciliary rootlet coiled-coil, rootletin [Source:HGNC Symbol;Acc:HGNC:21299]	CROCC	17.2266	17.487	27.7936	27.1194	24.3527	51.6505
ENSG00000137648	0.676005	-3.24385	0.964635	0.326022	0.473921	transmembrane protease, serine 4 [Source:HGNC Symbol;Acc:HGNC:11878]	TMPRSS4	0.092121	0.0215489	0.0854604	0.0588821	0.126554	0.126343
ENSG00000108819	0.675865	5.53786	19.3574	1.08397e-05	0.000105085	protein phosphatase 1 regulatory subunit 9B [Source:HGNC Symbol;Acc:HGNC:9298]	PPP1R9B	31.7702	39.1221	35.5705	44.8766	69.3789	57.865
ENSG00000124440	0.675833	5.91935	16.1434	5.87233e-05	0.000442843	hypoxia inducible factor 3 alpha subunit [Source:HGNC Symbol;Acc:HGNC:15825]	HIF3A	67.8241	37.0642	28.2399	138.297	47.9008	43.6436
ENSG00000251664	0.675727	-0.105852	4.34199	0.0371834	0.0909299	protocadherin alpha 12 [Source:HGNC Symbol;Acc:HGNC:8666]	PCDHA12	0.379999	1.48688	0.227894	0.420587	2.44069	0.513268
ENSG00000157240	0.675637	6.06542	20.1463	7.17371e-06	7.3456e-05	frizzled class receptor 1 [Source:HGNC Symbol;Acc:HGNC:4038]	FZD1	43.5617	58.4623	51.2667	65.7124	106.938	75.711
ENSG00000122863	0.675567	6.78038	21.7585	3.09213e-06	3.52616e-05	carbohydrate sulfotransferase 3 [Source:HGNC Symbol;Acc:HGNC:1971]	CHST3	89.9562	104.243	57.1255	136.598	185.248	86.2448
ENSG00000180532	0.675539	-2.75164	1.05684	0.303936	0.450854	zinc finger and SCAN domain containing 4 [Source:HGNC Symbol;Acc:HGNC:23709]	ZSCAN4	0.0806059	0.0323234	0.132938	0.201882	0	0.292168
ENSG00000105953	0.675394	9.41211	25.1172	5.39496e-07	7.70537e-06	oxoglutarate dehydrogenase [Source:HGNC Symbol;Acc:HGNC:8124]	OGDH	577.403	445.74	551.001	957.103	733.726	822.547
ENSG00000141867	0.675319	5.7668	10.9023	0.000960457	0.00464888	bromodomain containing 4 [Source:HGNC Symbol;Acc:HGNC:13575]	BRD4	36.8023	48.8083	38.5236	90.6532	54.0025	57.7229
ENSG00000100425	0.675172	5.13258	18.5166	1.68431e-05	0.000153097	bromodomain containing 1 [Source:HGNC Symbol;Acc:HGNC:1102]	BRD1	31.1139	25.3631	24.6126	46.5253	38.1652	44.5359
ENSG00000143450	0.675065	-1.03008	3.43137	0.063969	0.139261	ornithine decarboxylase antizyme 3 [Source:HGNC Symbol;Acc:HGNC:8097]	OAZ3	0.207272	0.344783	0.541249	0.403763	0.605653	0.679093
ENSG00000219607	0.674765	3.77728	13.7579	0.000207946	0.00129562	protein phosphatase 1 regulatory subunit 3G [Source:HGNC Symbol;Acc:HGNC:14945]	PPP1R3G	9.93755	8.68422	13.028	13.2989	18.0159	19.1252
ENSG00000176435	0.674762	5.52731	17.7368	2.53676e-05	0.000217388	C-type lectin domain family 14 member A [Source:HGNC Symbol;Acc:HGNC:19832]	CLEC14A	37.8617	27.8412	41.2489	50.5461	53.0443	65.9984
ENSG00000164093	0.674699	-1.93165	1.76976	0.183412	0.311221	paired like homeodomain 2 [Source:HGNC Symbol;Acc:HGNC:9005]	PITX2	0.379999	0.172392	0.047478	0.319646	0.45198	0.102654
ENSG00000125398	0.674509	4.88536	18.131	2.06219e-05	0.000180937	SRY-box 9 [Source:HGNC Symbol;Acc:HGNC:11204]	SOX9	21.5103	30.4594	16.5508	38.4164	44.3754	25.8766
ENSG00000088986	0.674357	4.4835	16.2848	5.44983e-05	0.000416668	dynein light chain LC8-type 1 [Source:HGNC Symbol;Acc:HGNC:15476]	DYNLL1	16.3169	21.8722	13.3128	21.4415	36.4205	24.7079
ENSG00000169957	0.674134	5.45631	17.6282	2.68572e-05	0.000227959	zinc finger protein 768 [Source:HGNC Symbol;Acc:HGNC:26273]	ZNF768	40.0266	32.9268	28.7432	52.6911	61.0625	47.8287
ENSG00000135709	0.673998	3.22588	14.7716	0.000121349	0.000819131	KIAA0513 [Source:HGNC Symbol;Acc:HGNC:29058]	KIAA0513	7.10483	8.16705	6.31457	12.1465	12.1854	10.0601
ENSG00000072134	0.673699	5.53432	15.6238	7.72775e-05	0.000560096	epsin 2 [Source:HGNC Symbol;Acc:HGNC:18639]	EPN2	42.7096	43.2918	23.2547	62.5412	57.4195	48.7052
ENSG00000254995	0.673483	2.43019	9.93233	0.00162401	0.00722116	STX16-NPEPL1 readthrough (NMD candidate) [Source:HGNC Symbol;Acc:HGNC:41993]	STX16-NPEPL1	4.51393	1.30371	6.37155	6.1658	2.11527	11.6472
ENSG00000152217	0.672548	4.80815	17.1061	3.53483e-05	0.000287396	SET binding protein 1 [Source:HGNC Symbol;Acc:HGNC:15573]	SETBP1	20.3703	29.1234	15.2025	39.9978	40.9313	22.3232
ENSG00000043143	0.672337	5.83044	20.6038	5.64848e-06	5.98261e-05	jade family PHD finger 2 [Source:HGNC Symbol;Acc:HGNC:22984]	JADE2	40.4296	42.4299	48.6175	67.992	63.1235	78.6484
ENSG00000137877	0.672325	3.60346	16.8366	4.07402e-05	0.000324807	spectrin beta, non-erythrocytic 5 [Source:HGNC Symbol;Acc:HGNC:15680]	SPTBN5	11.6648	8.68422	7.67244	19.0526	13.0893	12.6106
ENSG00000100412	0.672317	9.77932	23.3508	1.34987e-06	1.72639e-05	aconitase 2 [Source:HGNC Symbol;Acc:HGNC:118]	ACO2	835.48	509.492	702.285	1272.95	930.265	1021.92
ENSG00000099949	0.672305	4.92636	15.5144	8.18801e-05	0.000589191	leucine zipper like transcription regulator 1 [Source:HGNC Symbol;Acc:HGNC:6742]	LZTR1	22.823	21.0749	25.2298	38.9211	26.26	47.9471
ENSG00000130037	0.672269	2.60488	10.5611	0.00115491	0.00540049	potassium voltage-gated channel subfamily A member 5 [Source:HGNC Symbol;Acc:HGNC:6224]	KCNA5	5.98787	4.02965	4.1021	7.99956	7.76501	6.46718
ENSG00000114631	0.672238	1.89818	8.84078	0.00294574	0.0117719	podocalyxin like 2 [Source:HGNC Symbol;Acc:HGNC:17936]	PODXL2	2.91333	2.51045	3.12405	4.13016	4.24861	5.26692
ENSG00000187954	0.672103	5.21936	18.0188	2.1873e-05	0.000190808	cysteine and histidine rich 1 [Source:HGNC Symbol;Acc:HGNC:17806]	CYHR1	32.7375	27.1624	26.4357	45.3476	43.7516	47.9313
ENSG00000102870	0.672003	6.1454	21.7077	3.17522e-06	3.60106e-05	zinc finger protein 629 [Source:HGNC Symbol;Acc:HGNC:29008]	ZNF629	56.8502	45.1881	62.2341	86.2371	78.5812	95.452
ENSG00000176076	0.671994	-1.40793	2.04878	0.152329	0.271061	potassium voltage-gated channel subfamily E regulatory subunit 5 [Source:HGNC Symbol;Acc:HGNC:6241]	KCNE5	0.299393	0.204715	0.275372	0.19347	0.569494	0.576439
ENSG00000173714	0.671837	-0.719708	3.75824	0.0525477	0.119511	WAP, follistatin/kazal, immunoglobulin, kunitz and netrin domain containing 2 [Source:HGNC Symbol;Acc:HGNC:30916]	WFIKKN2	0.644847	0.258587	0.408311	1.25335	0.461019	0.473786
ENSG00000165757	0.671708	7.10043	22.879	1.72529e-06	2.12839e-05	KIAA1462 [Source:HGNC Symbol;Acc:HGNC:29283]	KIAA1462	111.075	134.789	72.9547	179.002	205.181	120.223
ENSG00000157657	0.670305	2.62972	3.34688	0.0673327	0.14495	zinc finger protein 618 [Source:HGNC Symbol;Acc:HGNC:29416]	ZNF618	1.80787	6.24919	7.39707	7.86497	7.57518	6.06446
ENSG00000067840	0.670245	2.74515	11.7778	0.000599418	0.00312888	PDZ domain containing 4 [Source:HGNC Symbol;Acc:HGNC:21167]	PDZD4	5.30847	4.46063	5.64988	7.34344	7.46671	9.82316
ENSG00000119714	0.669971	2.33804	8.92555	0.00281208	0.0113197	G protein-coupled receptor 68 [Source:HGNC Symbol;Acc:HGNC:4519]	GPR68	3.65029	3.77106	4.05462	4.48345	6.3458	7.85695
ENSG00000182324	0.669943	-0.129204	4.54367	0.0330408	0.0828604	potassium voltage-gated channel subfamily J member 14 [Source:HGNC Symbol;Acc:HGNC:6260]	KCNJ14	0.414545	0.991251	0.693179	0.807526	1.11187	1.31081
ENSG00000197608	0.669829	3.18375	10.7667	0.00103344	0.00494948	zinc finger protein 841 [Source:HGNC Symbol;Acc:HGNC:27611]	ZNF841	5.59635	7.49903	7.29262	7.99114	16.8227	9.15986
ENSG00000134461	0.66952	2.68412	11.4915	0.000699139	0.00356465	ankyrin repeat domain 16 [Source:HGNC Symbol;Acc:HGNC:23471]	ANKRD16	4.52544	4.75154	5.54543	8.18461	7.03281	8.34653
ENSG00000163815	0.669517	5.52284	15.6464	7.6356e-05	0.00055442	C-type lectin domain family 3 member B [Source:HGNC Symbol;Acc:HGNC:11891]	CLEC3B	38.472	16.7866	51.3427	46.744	31.4036	90.9037
ENSG00000016391	0.66949	1.90751	8.71701	0.00315255	0.0124218	choline dehydrogenase [Source:HGNC Symbol;Acc:HGNC:24288]	CHDH	4.29514	1.90708	2.51633	6.22468	3.10058	4.31145
ENSG00000178927	0.669416	4.17253	12.6676	0.000372049	0.00208683	chromosome 17 open reading frame 62 [Source:HGNC Symbol;Acc:HGNC:28672]	C17orf62	14.9351	11.8627	14.5378	17.101	21.5504	28.0323
ENSG00000261934	0.669262	4.83222	19.2884	1.12388e-05	0.000108169	protocadherin gamma subfamily A, 9 [Source:HGNC Symbol;Acc:HGNC:8707]	PCDHGA9	22.4199	20.2345	23.2737	35.7751	32.3346	36.7105
ENSG00000198863	0.669173	4.24617	17.1925	3.37774e-05	0.000276165	RUN domain containing 1 [Source:HGNC Symbol;Acc:HGNC:25418]	RUNDC1	14.9812	16.1294	12.895	23.3762	23.7199	22.5996
ENSG00000243414	0.668955	1.10035	0.95288	0.328987	0.476933	toll like receptor adaptor molecule 2 [Source:HGNC Symbol;Acc:HGNC:21354]	TICAM2	0.276363	1.00203	5.47896	2.66652	1.52769	1.72932
ENSG00000213694	0.668859	4.28069	17.8989	2.32959e-05	0.000201902	sphingosine-1-phosphate receptor 3 [Source:HGNC Symbol;Acc:HGNC:3167]	S1PR3	15.0157	17.1853	12.6766	23.0481	28.6103	19.9306
ENSG00000265763	0.668746	-2.17607	1.63518	0.200988	0.333351	zinc finger protein 488 [Source:HGNC Symbol;Acc:HGNC:23535]	ZNF488	0.0575756	0.247813	0.132938	0.142999	0.524297	0.102654
ENSG00000174151	0.668718	2.54367	5.55491	0.0184289	0.0523253	cytochrome b561 family member D1 [Source:HGNC Symbol;Acc:HGNC:26804]	CYB561D1	2.46424	8.93204	3.29497	6.67891	7.83733	5.63805
ENSG00000169252	0.668092	3.78132	15.6863	7.47636e-05	0.000545328	adrenoceptor beta 2 [Source:HGNC Symbol;Acc:HGNC:286]	ADRB2	10.0297	8.61958	13.3888	16.2851	15.2317	18.7619
ENSG00000278500	0.667973	-1.60572	1.92368	0.165452	0.288445			0.414545	0.129294	0.15193	0.48788	0.117515	0.529061
ENSG00000095739	0.667834	3.97875	15.6678	7.54968e-05	0.000548927	BMP and activin membrane bound inhibitor [Source:HGNC Symbol;Acc:HGNC:30251]	BAMBI	13.5533	12.2829	10.5496	19.0357	22.7888	16.2351
ENSG00000171604	0.667592	4.11394	5.98627	0.0144177	0.0430621	CXXC finger protein 5 [Source:HGNC Symbol;Acc:HGNC:26943]	CXXC5	12.206	15.095	10.5876	11.2381	20.8272	33.7493
ENSG00000170412	0.667325	3.95717	15.1219	0.000100789	0.000704072	G protein-coupled receptor class C group 5 member C [Source:HGNC Symbol;Acc:HGNC:13309]	GPRC5C	13.1157	9.08288	13.5312	24.6968	14.3006	18.2881
ENSG00000183092	0.667294	1.99155	8.33013	0.00389929	0.0148556	brain enriched guanylate kinase associated [Source:HGNC Symbol;Acc:HGNC:24163]	BEGAIN	2.64848	3.81416	2.75372	5.11433	4.98082	4.39041
ENSG00000185105	0.667189	2.92838	12.0343	0.000522308	0.00278987	myeloid associated differentiation marker like 2 [Source:HGNC Symbol;Acc:HGNC:34548]	MYADML2	5.59635	5.77512	6.11516	7.65467	10.8385	9.53099
ENSG00000171992	0.666916	10.1066	21.6362	3.29577e-06	3.71411e-05	synaptopodin [Source:HGNC Symbol;Acc:HGNC:30672]	SYNPO	864.705	909.656	757.378	1226.77	1737.1	1119.21
ENSG00000167461	0.666833	3.01948	6.92539	0.00849804	0.0278888	RAB8A, member RAS oncogene family [Source:HGNC Symbol;Acc:HGNC:7007]	RAB8A	4.19151	6.20609	7.17867	5.39192	17.6091	7.91222
ENSG00000178623	0.666293	0.823865	6.68145	0.00974213	0.0311861	G protein-coupled receptor 35 [Source:HGNC Symbol;Acc:HGNC:4492]	GPR35	0.955755	1.36836	1.74719	1.85058	1.91639	2.60582
ENSG00000132205	0.665661	5.57232	19.4229	1.04743e-05	0.000102286	elastin microfibril interfacer 2 [Source:HGNC Symbol;Acc:HGNC:19881]	EMILIN2	35.6854	31.0951	43.9551	59.8158	51.372	63.3846
ENSG00000197256	0.665636	8.6841	22.673	1.92049e-06	2.33151e-05	KN motif and ankyrin repeat domains 2 [Source:HGNC Symbol;Acc:HGNC:29300]	KANK2	365.283	334.698	252.773	532.656	589.427	392.903
ENSG00000163125	0.665633	5.51282	14.3467	0.000152043	0.00099125	regulation of nuclear pre-mRNA domain containing 2 [Source:HGNC Symbol;Acc:HGNC:29039]	RPRD2	31.206	37.0534	37.0898	67.5546	48.2353	52.6376
ENSG00000183621	0.665587	4.05044	17.021	3.69687e-05	0.000299203	zinc finger protein 438 [Source:HGNC Symbol;Acc:HGNC:21029]	ZNF438	13.6339	11.9812	12.6861	23.0902	19.2001	18.6593
ENSG00000162775	0.665535	5.46604	18.2591	1.92803e-05	0.000171268	RNA binding motif protein 15 [Source:HGNC Symbol;Acc:HGNC:14959]	RBM15	35.9042	33.4332	33.0067	48.5525	58.5766	55.5751
ENSG00000245680	0.665533	4.50455	9.86118	0.00168803	0.00744662	zinc finger protein 585B [Source:HGNC Symbol;Acc:HGNC:30948]	ZNF585B	12.0679	20.6331	20.52	30.3579	29.5595	22.8839
ENSG00000169490	0.665058	3.40887	14.5412	0.000137126	0.000909535	TM2 domain containing 2 [Source:HGNC Symbol;Acc:HGNC:24127]	TM2D2	7.8418	9.26604	7.53001	13.2401	12.4656	13.2186
ENSG00000185761	0.664937	4.4993	17.6136	2.70639e-05	0.000229228	ADAMTS like 5 [Source:HGNC Symbol;Acc:HGNC:27912]	ADAMTSL5	17.0424	17.5624	17.7758	29.5336	27.4804	26.1372
ENSG00000136715	0.664792	4.26625	13.2749	0.000268989	0.00159946	Sin3A associated protein 130 [Source:HGNC Symbol;Acc:HGNC:29813]	SAP130	12.0563	15.4721	17.1965	25.8745	20.4747	24.2026
ENSG00000128271	0.664356	2.74242	10.2891	0.00133817	0.0061112	adenosine A2a receptor [Source:HGNC Symbol;Acc:HGNC:263]	ADORA2A	4.52544	4.14817	6.48549	5.50127	7.29495	12.0026
ENSG00000169221	0.66339	4.83876	18.8992	1.37812e-05	0.000128174	TBC1 domain family member 10B [Source:HGNC Symbol;Acc:HGNC:24510]	TBC1D10B	21.9824	23.1759	21.2227	33.6553	37.0533	34.4442
ENSG00000156486	0.663373	-0.0801802	5.04519	0.0246944	0.0656265	potassium voltage-gated channel modifier subfamily S member 2 [Source:HGNC Symbol;Acc:HGNC:6301]	KCNS2	0.598787	0.678792	0.864099	1.00941	1.24746	1.12129
ENSG00000127220	0.663058	2.96023	13.0604	0.000301601	0.0017556	abhydrolase domain containing 8 [Source:HGNC Symbol;Acc:HGNC:23759]	ABHD8	5.61938	6.10912	6.26709	8.75661	10.3413	9.43623
ENSG00000082684	0.663019	3.76515	15.6385	7.66786e-05	0.000556124	semaphorin 5B [Source:HGNC Symbol;Acc:HGNC:10737]	SEMA5B	9.38483	8.51183	13.8446	14.5439	15.1775	19.9306
ENSG00000122733	0.662962	0.147713	3.25521	0.0711967	0.151397	PHD finger protein 24 [Source:HGNC Symbol;Acc:HGNC:29180]	PHF24	0.322424	1.92863	0.522258	0.521527	1.65425	1.56349
ENSG00000268434	0.662845	-1.56634	2.63409	0.104592	0.204526			0.299393	0.215489	0.218399	0.344881	0.361584	0.450096
ENSG00000133454	0.662697	10.3017	24.5854	7.10881e-07	9.87164e-06	myosin XVIIIB [Source:HGNC Symbol;Acc:HGNC:18150]	MYO18B	1132.75	997.414	800.08	1704.46	1701.47	1236.57
ENSG00000196972	0.66256	2.73759	11.6119	0.0006553	0.00338005	small integral membrane protein 10 like 2B [Source:HGNC Symbol;Acc:HGNC:34500]	SMIM10L2B	6.80544	3.53403	5.23207	9.59778	6.02037	8.66238
ENSG00000060140	0.662533	-2.38058	0.655787	0.418051	0.565053	serine/threonine/tyrosine kinase 1 [Source:HGNC Symbol;Acc:HGNC:18889]	STYK1	0.126666	0.280136	0.0284868	0.235528	0.0723168	0.284271
ENSG00000167767	0.662474	-0.322493	3.81783	0.0507099	0.115974	keratin 80 [Source:HGNC Symbol;Acc:HGNC:27056]	KRT80	0.172727	0.991251	0.588727	0.336469	1.93447	0.639611
ENSG00000114113	0.662419	-0.986974	2.61467	0.105879	0.206424	retinol binding protein 2 [Source:HGNC Symbol;Acc:HGNC:9920]	RBP2	0.253333	0.420204	0.427302	0.807526	0.470059	0.497475
ENSG00000197562	0.662337	3.30706	2.2975	0.129582	0.240565	RAB40C, member RAS oncogene family [Source:HGNC Symbol;Acc:HGNC:18285]	RAB40C	12.1024	7.87614	3.56085	5.49286	15.8012	14.4268
ENSG00000270765	0.662192	-2.25529	1.53084	0.215986	0.351924	growth arrest specific 2 like 2 [Source:HGNC Symbol;Acc:HGNC:24846]	GAS2L2	0.126666	0.0430979	0.246886	0.092529	0.135594	0.457993
ENSG00000150457	0.661949	6.07881	20.3956	6.29731e-06	6.5828e-05	large tumor suppressor kinase 2 [Source:HGNC Symbol;Acc:HGNC:6515]	LATS2	54.7199	55.9949	45.9682	82.4602	95.1869	71.0758
ENSG00000070614	0.661796	6.67662	20.5255	5.88406e-06	6.19121e-05	N-deacetylase and N-sulfotransferase 1 [Source:HGNC Symbol;Acc:HGNC:7680]	NDST1	71.2095	82.3277	84.4538	128.018	126.654	120.95
ENSG00000100628	0.661607	6.90557	20.5055	5.94602e-06	6.24819e-05	ankyrin repeat and SOCS box containing 2 [Source:HGNC Symbol;Acc:HGNC:16012]	ASB2	111.259	89.913	78.7755	154.978	150.771	133.489
ENSG00000124496	0.661543	2.66801	8.78869	0.00303104	0.0120288	transcriptional regulating factor 1 [Source:HGNC Symbol;Acc:HGNC:18273]	TRERF1	2.65999	7.21889	5.20359	5.07227	8.02716	9.77578
ENSG00000140543	0.661429	3.17873	13.4696	0.000242456	0.00147264	de-etiolated homolog 1 (Arabidopsis) [Source:HGNC Symbol;Acc:HGNC:25477]	DET1	7.56544	6.68017	6.6944	11.1287	12.3933	9.71261
ENSG00000176903	0.661424	4.68853	17.9756	2.23753e-05	0.000194766	paraneoplastic Ma antigen 1 [Source:HGNC Symbol;Acc:HGNC:9158]	PNMA1	16.9387	19.7388	23.2072	26.3035	33.4194	34.9338
ENSG00000163945	0.661313	4.19448	14.7293	0.000124106	0.000834575	UV stimulated scaffold protein A [Source:HGNC Symbol;Acc:HGNC:29304]	UVSSA	10.8127	13.4789	18.4594	17.4039	25.5549	23.9657
ENSG00000173110	0.661173	1.54463	7.52715	0.0060776	0.0211863	heat shock protein family A (Hsp70) member 6 [Source:HGNC Symbol;Acc:HGNC:5239]	HSPA6	0.87515	1.52997	4.17806	1.41317	2.20566	7.0673
ENSG00000114378	0.660995	5.24873	18.409	1.78213e-05	0.000160172	hyaluronoglucosaminidase 1 [Source:HGNC Symbol;Acc:HGNC:5320]	HYAL1	41.0284	23.9947	24.1758	58.5372	41.2658	38.9768
ENSG00000138316	0.660971	1.54495	7.88981	0.00497142	0.0180324	ADAM metallopeptidase with thrombospondin type 1 motif 14 [Source:HGNC Symbol;Acc:HGNC:14899]	ADAMTS14	1.16303	2.55355	2.98162	1.81693	4.02262	4.78524
ENSG00000033100	0.660463	5.47888	16.6142	4.58062e-05	0.000358595	chondroitin polymerizing factor 2 [Source:HGNC Symbol;Acc:HGNC:29270]	CHPF2	35.1326	37.3982	30.7372	44.9943	62.4636	56.6964
ENSG00000131149	0.659767	4.90551	8.74556	0.00310357	0.0122639	Gse1 coiled-coil protein [Source:HGNC Symbol;Acc:HGNC:28979]	GSE1	24.8496	23.0681	18.5449	26.0595	60.4659	26.6978
ENSG00000101331	0.659596	3.57326	15.9422	6.53059e-05	0.000485955	CCM2 like scaffolding protein [Source:HGNC Symbol;Acc:HGNC:16153]	CCM2L	9.64968	7.11115	10.7205	14.7205	10.7752	18.2565
ENSG00000144712	0.658905	7.059	21.2409	4.05031e-06	4.45173e-05	cullin associated and neddylation dissociated 2 (putative) [Source:HGNC Symbol;Acc:HGNC:30689]	CAND2	126.137	105.202	78.6425	190.433	179.002	120.5
ENSG00000214226	0.65876	0.591641	5.46158	0.0194391	0.0545313	chromosome 17 open reading frame 67 [Source:HGNC Symbol;Acc:HGNC:27900]	C17orf67	1.01333	1.04512	1.3009	1.78329	1.17515	2.54265
ENSG00000086015	0.658724	7.09698	20.7399	5.26087e-06	5.61288e-05	microtubule associated serine/threonine kinase 2 [Source:HGNC Symbol;Acc:HGNC:19035]	MAST2	107.263	97.983	112.257	188.7	143.061	171.961
ENSG00000165617	0.658548	1.71392	6.50403	0.010763	0.0339589	dishevelled binding antagonist of beta catenin 1 [Source:HGNC Symbol;Acc:HGNC:17748]	DACT1	2.03818	1.37913	3.98815	2.23752	2.7842	7.04362
ENSG00000163157	0.658424	-2.56626	1.31735	0.251068	0.39237	tropomodulin 4 [Source:HGNC Symbol;Acc:HGNC:11874]	TMOD4	0.161212	0.0754213	0.104452	0.100941	0.207911	0.236893
ENSG00000214717	0.658312	5.92215	18.5621	1.64455e-05	0.000150079	zinc finger BED-type containing 1 [Source:HGNC Symbol;Acc:HGNC:447]	ZBED1	54.4896	43.572	43.091	79.6086	78.6897	64.2217
ENSG00000148296	0.658052	5.09292	16.1824	5.75265e-05	0.000435868	surfeit 6 [Source:HGNC Symbol;Acc:HGNC:11478]	SURF6	29.0181	23.316	27.1384	38.1051	42.929	44.1016
ENSG00000131591	0.657956	2.46543	10.3296	0.00130913	0.00600362	chromosome 1 open reading frame 159 [Source:HGNC Symbol;Acc:HGNC:26062]	C1orf159	4.39878	3.52325	4.90922	7.19203	6.00229	6.94096
ENSG00000059122	0.657793	5.54766	19.3168	1.1073e-05	0.000106959	FLYWCH-type zinc finger 1 [Source:HGNC Symbol;Acc:HGNC:25404]	FLYWCH1	42.0993	27.9059	38.5331	65.3507	42.3143	64.269
ENSG00000131400	0.65735	-0.416708	3.87742	0.0489398	0.112957	napsin A aspartic peptidase [Source:HGNC Symbol;Acc:HGNC:13395]	NAPSA	0.368484	0.775762	0.56024	0.698174	0.822603	1.1134
ENSG00000140320	0.657295	4.48123	17.269	3.24434e-05	0.000267029	bromo adjacent homology domain containing 1 [Source:HGNC Symbol;Acc:HGNC:29153]	BAHD1	17.3763	15.4398	19.2096	26.1184	26.8566	28.8378
ENSG00000150455	0.656777	3.08418	13.3383	0.000260036	0.00155721	TIR domain containing adaptor protein [Source:HGNC Symbol;Acc:HGNC:17192]	TIRAP	5.84968	7.21889	6.55196	9.70714	12.3481	9.04931
ENSG00000162494	0.656548	0.123777	3.80263	0.0511721	0.116897	leucine rich repeat containing 38 [Source:HGNC Symbol;Acc:HGNC:27005]	LRRC38	0.310908	1.84243	0.132938	0.580409	3.46216	0.11055
ENSG00000185220	0.65649	2.63128	10.3293	0.00130937	0.00600362	piggyBac transposable element derived 2 [Source:HGNC Symbol;Acc:HGNC:19399]	PGBD2	5.53878	5.25794	3.53236	7.3855	9.69949	5.62226
ENSG00000125503	0.656366	7.26047	21.9245	2.83592e-06	3.26712e-05	protein phosphatase 1 regulatory subunit 12C [Source:HGNC Symbol;Acc:HGNC:14947]	PPP1R12C	131.549	109.361	116.577	194.875	176.146	191.291
ENSG00000204963	0.655908	-1.27044	3.13896	0.0764424	0.160318	protocadherin alpha 7 [Source:HGNC Symbol;Acc:HGNC:8673]	PCDHA7	0.241818	0.334009	0.332346	0.378528	0.578534	0.481682
ENSG00000204969	0.655892	-1.7144	1.88568	0.16969	0.29369	protocadherin alpha 2 [Source:HGNC Symbol;Acc:HGNC:8668]	PCDHA2	0.172727	0.172392	0.303859	0.311234	0.497178	0.236893
ENSG00000183864	0.655816	6.66515	21.2457	4.04014e-06	4.4436e-05	transducer of ERBB2, 2 [Source:HGNC Symbol;Acc:HGNC:11980]	TOB2	95.7022	81.024	57.8567	160.639	128.724	84.8313
ENSG00000134245	0.655377	4.42378	4.47142	0.0344664	0.0857424	Wnt family member 2B [Source:HGNC Symbol;Acc:HGNC:12781]	WNT2B	19.829	34.4029	3.77925	20.3396	35.6522	14.6953
ENSG00000170954	0.655293	4.52819	17.1424	3.46786e-05	0.000282667	zinc finger protein 415 [Source:HGNC Symbol;Acc:HGNC:20636]	ZNF415	19.5181	15.0843	19.1811	31.6786	25.7448	27.069
ENSG00000184313	0.655144	4.91783	8.28707	0.00399283	0.0151229	maestro heat like repeat family member 7 [Source:HGNC Symbol;Acc:HGNC:24802]	MROH7	15.0733	30.2332	25.3248	32.0823	27.0736	51.39
ENSG00000131188	0.654816	-0.423685	3.579	0.0585144	0.12982	proline rich 7, synaptic [Source:HGNC Symbol;Acc:HGNC:28130]	PRR7	0.552726	0.377106	0.683683	0.529939	0.696049	1.46084
ENSG00000226479	0.654752	4.33647	16.4085	5.10552e-05	0.000394294	transmembrane protein 185B [Source:HGNC Symbol;Acc:HGNC:18896]	TMEM185B	15.1194	15.4614	16.2944	22.064	28.3211	23.7919
ENSG00000189114	0.654741	1.7019	8.06372	0.00451604	0.0166827	biogenesis of lysosomal organelles complex 1 subunit 3 [Source:HGNC Symbol;Acc:HGNC:20914]	BLOC1S3	2.54484	2.27341	2.69675	3.6591	3.79663	4.38252
ENSG00000146834	0.654736	4.87645	17.8785	2.35472e-05	0.000203749	methylphosphate capping enzyme [Source:HGNC Symbol;Acc:HGNC:20247]	MEPCE	21.1763	20.6547	26.3693	32.3599	31.8555	43.6436
ENSG00000106571	0.654504	3.62132	12.1578	0.00048882	0.00263685	GLI family zinc finger 3 [Source:HGNC Symbol;Acc:HGNC:4319]	GLI3	5.17029	15.8385	8.87838	10.9184	19.2182	13.6608
ENSG00000170549	0.654263	0.0442338	3.88773	0.0486402	0.112346	iroquois homeobox 1 [Source:HGNC Symbol;Acc:HGNC:14358]	IRX1	0.529696	1.78856	0.189912	0.588821	2.44973	0.544854
ENSG00000177614	0.654247	3.30811	14.3051	0.000155442	0.00101012	piggyBac transposable element derived 5 [Source:HGNC Symbol;Acc:HGNC:19405]	PGBD5	8.6018	8.00543	6.39054	12.7942	13.704	9.78368
ENSG00000171302	0.654211	4.3109	12.2128	0.000474634	0.00257308	calcium activated nucleotidase 1 [Source:HGNC Symbol;Acc:HGNC:19721]	CANT1	11.3079	18.5429	16.9022	24.4361	22.4453	25.2765
ENSG00000146067	0.65412	4.09068	12.8964	0.000329211	0.00188415	family with sequence similarity 193 member B [Source:HGNC Symbol;Acc:HGNC:25524]	FAM193B	11.4575	12.5199	14.8416	18.4553	15.1232	29.6353
ENSG00000176678	0.653896	1.40104	7.52444	0.00608674	0.021209	forkhead box L1 [Source:HGNC Symbol;Acc:HGNC:3817]	FOXL1	1.87697	2.47813	1.76618	2.82634	3.57064	3.17436
ENSG00000141577	0.653891	4.15063	16.0948	6.02488e-05	0.000451584	centrosomal protein 131 [Source:HGNC Symbol;Acc:HGNC:29511]	CEP131	14.9236	12.7246	13.6642	21.7191	19.4622	23.9025
ENSG00000171873	0.653592	-0.678896	3.72764	0.0535191	0.12129	adrenoceptor alpha 1D [Source:HGNC Symbol;Acc:HGNC:280]	ADRA1D	0.218787	0.323234	0.835613	0.294411	0.587574	1.30291
ENSG00000188707	0.653127	1.21051	7.05946	0.00788478	0.0262199	ZBED6 C-terminal like [Source:HGNC Symbol;Acc:HGNC:21720]	ZBED6CL	1.05939	2.49968	1.74719	1.55617	3.96838	2.89799
ENSG00000168427	0.652995	5.5777	15.9339	6.55947e-05	0.000487323	kelch like family member 30 [Source:HGNC Symbol;Acc:HGNC:24770]	KLHL30	51.9678	29.2527	31.9242	66.8144	55.7291	50.7188
ENSG00000197162	0.652967	3.22774	14.0605	0.000177026	0.00113112	zinc finger protein 785 [Source:HGNC Symbol;Acc:HGNC:26496]	ZNF785	6.42544	5.38724	9.97987	9.93425	8.65089	15.6349
ENSG00000186376	0.652663	3.64555	13.0162	0.000308802	0.00179036	zinc finger protein 75D [Source:HGNC Symbol;Acc:HGNC:13145]	ZNF75D	9.98361	9.22295	9.69501	11.8605	16.7323	17.4274
ENSG00000176920	0.652536	1.10966	5.71376	0.0168325	0.0487336	fucosyltransferase 2 [Source:HGNC Symbol;Acc:HGNC:4013]	FUT2	1.53151	1.89631	1.5193	3.05346	2.04295	2.74006
ENSG00000141068	0.652525	2.90831	6.72561	0.0095038	0.0305636	kinase suppressor of ras 1 [Source:HGNC Symbol;Acc:HGNC:6465]	KSR1	3.5006	6.51855	7.84336	9.67349	7.34015	9.98109
ENSG00000142149	0.652437	-0.456932	4.37203	0.0365334	0.0897344	hormonally up-regulated Neu-associated kinase [Source:HGNC Symbol;Acc:HGNC:13326]	HUNK	0.333939	0.743438	0.56024	0.538351	1.23842	0.813332
ENSG00000187678	0.652218	5.27123	17.7004	2.58572e-05	0.000220757	sprouty RTK signaling antagonist 4 [Source:HGNC Symbol;Acc:HGNC:15533]	SPRY4	27.3599	36.1376	26.9675	45.4654	50.8025	44.8201
ENSG00000164729	0.652103	-1.27783	2.66687	0.102457	0.201432	solute carrier family 35 member G3 [Source:HGNC Symbol;Acc:HGNC:26848]	SLC35G3	0.414545	0.344783	0.142434	0.471057	0.777405	0.213204
ENSG00000070985	0.651705	-1.64252	2.33057	0.126856	0.236958	transient receptor potential cation channel subfamily M member 5 [Source:HGNC Symbol;Acc:HGNC:14323]	TRPM5	0.264848	0.19394	0.227894	0.260764	0.361584	0.473786
ENSG00000125901	0.651705	5.05048	15.7202	7.34364e-05	0.00053736	mitochondrial ribosomal protein S26 [Source:HGNC Symbol;Acc:HGNC:14045]	MRPS26	30.3424	22.2924	25.0019	39.3333	39.4759	42.2301
ENSG00000135111	0.65162	4.26998	15.9146	6.6267e-05	0.000491634	T-box 3 [Source:HGNC Symbol;Acc:HGNC:11602]	TBX3	13.5533	8.5657	23.72	20.7938	15.3583	33.5598
ENSG00000164850	0.651497	1.59014	5.15312	0.0232047	0.0624587	G protein-coupled estrogen receptor 1 [Source:HGNC Symbol;Acc:HGNC:4485]	GPER1	1.87697	2.07947	2.60179	3.17963	1.97063	6.15132
ENSG00000081842	0.651136	-1.15063	2.73191	0.0983615	0.195397	protocadherin alpha 6 [Source:HGNC Symbol;Acc:HGNC:8672]	PCDHA6	0.149697	0.764987	0.170921	0.344881	0.876841	0.284271
ENSG00000228672	0.651054	6.298	16.948	3.84183e-05	0.000309529	proline rich basic protein 1 [Source:HGNC Symbol;Acc:HGNC:41906]	PROB1	70.5417	52.6117	60.7908	94.0516	107.146	86.8054
ENSG00000173868	0.650785	1.39397	7.20721	0.00726113	0.0244762	phosphoethanolamine/phosphocholine phosphatase [Source:HGNC Symbol;Acc:HGNC:16815]	PHOSPHO1	1.8309	1.58385	2.53532	2.81793	2.14238	4.66679
ENSG00000159784	0.650644	-0.771247	3.65605	0.055866	0.125228	family with sequence similarity 131 member B [Source:HGNC Symbol;Acc:HGNC:22202]	FAM131B	0.207272	0.60337	0.522258	0.412175	0.912999	0.710679
ENSG00000116685	0.65042	5.58855	18.0631	2.13698e-05	0.000186928	KIAA2013 [Source:HGNC Symbol;Acc:HGNC:28513]	KIAA2013	37.666	40.4474	34.0987	52.3126	64.5969	59.4364
ENSG00000113555	0.650378	5.09396	17.9726	2.24106e-05	0.000194967	protocadherin 12 [Source:HGNC Symbol;Acc:HGNC:8657]	PCDH12	29.1448	22.6372	28.0595	44.7168	37.5686	42.6249
ENSG00000138347	0.649909	8.8349	21.0707	4.42652e-06	4.82264e-05	myopalladin [Source:HGNC Symbol;Acc:HGNC:23246]	MYPN	360.17	437.239	256.96	641.007	691.854	352.449
ENSG00000176182	0.649399	2.1252	8.46571	0.00361903	0.0139445	Myb related transcription factor, partner of profilin [Source:HGNC Symbol;Acc:HGNC:20178]	MYPOP	3.92666	3.41551	2.8107	6.03121	4.66443	5.17216
ENSG00000149596	0.649048	8.76023	21.3941	3.73918e-06	4.15825e-05	junctophilin 2 [Source:HGNC Symbol;Acc:HGNC:14202]	JPH2	446.015	358.758	207.963	632.099	638.873	317.776
ENSG00000179361	0.649045	2.1316	8.96721	0.00274868	0.0111063	AT-rich interaction domain 3B [Source:HGNC Symbol;Acc:HGNC:14350]	ARID3B	3.13211	2.59665	4.45344	4.8788	4.16725	6.87779
ENSG00000179604	0.649002	6.06363	19.4132	1.05278e-05	0.000102683	CDC42 effector protein 4 [Source:HGNC Symbol;Acc:HGNC:17147]	CDC42EP4	71.8314	44.3693	40.6601	106.652	75.9778	61.679
ENSG00000076201	0.648757	4.18231	8.21762	0.00414856	0.0156168	protein tyrosine phosphatase, non-receptor type 23 [Source:HGNC Symbol;Acc:HGNC:14406]	PTPN23	10.3521	16.0971	15.8671	26.6652	16.5425	23.2234
ENSG00000205710	0.648752	1.6834	7.81569	0.00517946	0.0185932	chromosome 17 open reading frame 107 [Source:HGNC Symbol;Acc:HGNC:37238]	C17orf107	1.40485	3.21079	2.74423	2.02723	5.3424	4.37462
ENSG00000185800	0.648451	4.876	17.4884	2.89064e-05	0.000242273	dystrophia myotonica, WD repeat containing [Source:HGNC Symbol;Acc:HGNC:2936]	DMWD	25.2066	21.5597	21.8589	37.735	35.6883	33.9783
ENSG00000170921	0.647921	4.91214	10.7245	0.00105724	0.00503186	tetratricopeptide repeat, ankyrin repeat and coiled-coil containing 2 [Source:HGNC Symbol;Acc:HGNC:30212]	TANC2	15.7757	41.6972	16.2944	35.4891	45.8127	25.4502
ENSG00000165443	0.647852	-0.158137	1.33121	0.248591	0.38941	phytanoyl-CoA 2-hydroxylase interacting protein like [Source:HGNC Symbol;Acc:HGNC:29378]	PHYHIPL	0.253333	1.06667	0.693179	1.7917	0.569494	0.837022
ENSG00000182957	0.64748	5.1742	13.4693	0.000242497	0.00147264	spermatogenesis associated 13 [Source:HGNC Symbol;Acc:HGNC:23222]	SPATA13	26.243	27.281	29.1325	33.4787	39.1234	61.1973
ENSG00000156968	0.647475	2.30238	1.42417	0.232718	0.371297	MPV17 mitochondrial inner membrane protein like [Source:HGNC Symbol;Acc:HGNC:26827]	MPV17L	7.63453	0.377106	6.83683	4.92927	3.33561	6.35663
ENSG00000187566	0.647473	0.879347	4.80666	0.02835	0.0732637	NHL repeat containing E3 ubiquitin protein ligase 1 [Source:HGNC Symbol;Acc:HGNC:21576]	NHLRC1	1.40485	1.14209	1.64274	1.70758	2.96499	2.02149
ENSG00000165886	0.647178	3.90896	14.3972	0.000148022	0.000968978	ubiquitin domain containing 1 [Source:HGNC Symbol;Acc:HGNC:25683]	UBTD1	13.3345	12.8108	8.79292	18.06	23.2589	13.7319
ENSG00000058404	0.646933	7.33042	21.5806	3.39257e-06	3.81516e-05	calcium/calmodulin dependent protein kinase II beta [Source:HGNC Symbol;Acc:HGNC:1461]	CAMK2B	147.417	112.496	116.881	224.888	181.795	182.028
ENSG00000115526	0.646874	3.66976	12.2694	0.000460447	0.00250634	carbohydrate sulfotransferase 10 [Source:HGNC Symbol;Acc:HGNC:19650]	CHST10	12.0794	7.84381	10.0274	14.6616	16.0724	15.5165
ENSG00000172765	0.646581	4.99527	6.199	0.0127822	0.0389421	transmembrane and coiled-coil domain family 1 [Source:HGNC Symbol;Acc:HGNC:29116]	TMCC1	20.0363	34.78	20.3586	47.6861	27.3809	40.9588
ENSG00000160007	0.646479	8.11686	21.2489	4.03348e-06	4.43933e-05	Rho GTPase activating protein 35 [Source:HGNC Symbol;Acc:HGNC:4591]	ARHGAP35	205.05	242.921	198.164	332.448	407.243	279.62
ENSG00000049283	0.646333	2.5079	7.56992	0.00593506	0.0207573	epsin 3 [Source:HGNC Symbol;Acc:HGNC:18235]	EPN3	3.94969	4.1374	4.78578	6.92285	4.41132	9.7284
ENSG00000174951	0.646191	2.28708	8.7967	0.00301775	0.0119946	fucosyltransferase 1 (H blood group) [Source:HGNC Symbol;Acc:HGNC:4012]	FUT1	2.8903	4.84851	3.6653	4.54233	6.57179	6.60142
ENSG00000182742	0.646065	0.731938	5.5218	0.018781	0.0530428	homeobox B4 [Source:HGNC Symbol;Acc:HGNC:5115]	HOXB4	1.66969	1.83166	0.512762	2.25434	2.44069	1.14498
ENSG00000175697	0.645973	-0.822758	2.63493	0.104537	0.204467	G protein-coupled receptor 156 [Source:HGNC Symbol;Acc:HGNC:20844]	GPR156	0.149697	0.894281	0.351337	0.48788	0.88588	0.497475
ENSG00000270339	0.645965	-3.74027	0.817852	0.365809	0.514173			0.0345454	0.0646468	0.0284868	0.0420587	0.117515	0.0473786
ENSG00000228594	0.645878	0.682384	6.09214	0.0135785	0.0409861	fibronectin type III domain containing 10 [Source:HGNC Symbol;Acc:HGNC:42951]	FNDC10	0.633332	1.49765	1.55728	1.01782	2.13334	2.61372
ENSG00000074855	0.645267	3.42447	14.6669	0.000128281	0.000860124	anoctamin 8 [Source:HGNC Symbol;Acc:HGNC:29329]	ANO8	8.54422	6.43236	9.95139	13.5849	9.45542	16.2666
ENSG00000105618	0.645176	5.03912	17.3598	3.09303e-05	0.000256159	pre-mRNA processing factor 31 [Source:HGNC Symbol;Acc:HGNC:15446]	PRPF31	25.2181	23.2621	28.1544	39.4847	34.1697	46.81
ENSG00000136114	0.645173	3.89761	15.6921	7.45353e-05	0.000544241	thrombospondin type 1 domain containing 1 [Source:HGNC Symbol;Acc:HGNC:17754]	THSD1	11.02	8.75964	14.8796	16.3776	13.6679	24.5263
ENSG00000262304	0.644785	3.04342	12.9203	0.000325035	0.00186637			6.06847	5.01013	8.03328	9.75761	7.26783	13.1397
ENSG00000073803	0.644568	3.67289	13.2512	0.000272404	0.00161378	mitogen-activated protein kinase kinase kinase 13 [Source:HGNC Symbol;Acc:HGNC:6852]	MAP3K13	9.84543	6.42158	14.1674	14.3336	12.8091	18.7619
ENSG00000128591	0.644537	12.9648	26.5602	2.55458e-07	4.01738e-06	filamin C [Source:HGNC Symbol;Acc:HGNC:3756]	FLNC	7776.37	7025.3	3784.52	11793.2	12011	5576.12
ENSG00000254245	0.644279	4.80718	9.19419	0.00242784	0.0100222	protocadherin gamma subfamily A, 3 [Source:HGNC Symbol;Acc:HGNC:8701]	PCDHGA3	18.9539	23.7469	20.8903	43.4382	40.4431	20.3491
ENSG00000110900	0.644197	1.82066	3.33797	0.0676981	0.145541	tetraspanin 11 [Source:HGNC Symbol;Acc:HGNC:30795]	TSPAN11	3.13211	0.463302	6.08668	3.4404	1.89831	5.98549
ENSG00000105538	0.644118	4.38454	16.4346	5.03564e-05	0.000390592	Ras interacting protein 1 [Source:HGNC Symbol;Acc:HGNC:24716]	RASIP1	16.9503	12.8539	19.0387	24.4865	20.9538	30.8592
ENSG00000184436	0.643738	3.36032	13.6289	0.000222734	0.00137281	THAP domain containing 7 [Source:HGNC Symbol;Acc:HGNC:23190]	THAP7	7.58847	7.27277	9.09678	10.6324	12.9899	13.8661
ENSG00000172336	0.643687	3.63563	13.5738	0.000229366	0.00140773	POP7 homolog, ribonuclease P/MRP subunit [Source:HGNC Symbol;Acc:HGNC:19949]	POP7	10.6285	9.27682	9.10628	13.1728	16.3345	15.8955
ENSG00000163956	0.643468	7.72526	20.3535	6.43743e-06	6.69434e-05	LDL receptor related protein associated protein 1 [Source:HGNC Symbol;Acc:HGNC:6701]	LRPAP1	163.043	130.403	199.578	225.056	211.246	340.139
ENSG00000100926	0.643394	3.51289	14.1441	0.000169326	0.00108843	transmembrane 9 superfamily member 1 [Source:HGNC Symbol;Acc:HGNC:11864]	TM9SF1	7.01271	12.5307	7.43505	10.9857	17.0848	13.2897
ENSG00000160439	0.643131	5.43259	17.3618	3.08966e-05	0.000256159	retinol dehydrogenase 13 [Source:HGNC Symbol;Acc:HGNC:19978]	RDH13	32.6799	40.8137	28.069	47.6188	59.1732	50.624
ENSG00000088808	0.642986	6.05898	19.2214	1.16399e-05	0.000111162	protein phosphatase 1 regulatory subunit 13B [Source:HGNC Symbol;Acc:HGNC:14950]	PPP1R13B	61.4562	40.4258	53.4412	103.473	61.0986	79.9592
ENSG00000232838	0.642969	2.59191	7.88816	0.00497593	0.0180447	PET117 homolog [Source:HGNC Symbol;Acc:HGNC:40045]	PET117	6.18362	3.78184	4.24453	6.99015	8.23507	6.59352
ENSG00000243978	0.642807	0.496488	1.40701	0.235554	0.374814	retrotransposon gag domain containing 1 [Source:HGNC Symbol;Acc:HGNC:29245]	RGAG1	0.967271	1.77779	0.531753	2.30481	0.623732	2.10045
ENSG00000135835	0.642696	4.84005	17.8239	2.4232e-05	0.000208773	KIAA1614 [Source:HGNC Symbol;Acc:HGNC:29327]	KIAA1614	23.9054	23.7146	19.409	36.6415	37.7674	30.2591
ENSG00000099326	0.642532	4.22527	16.0526	6.16085e-05	0.000460054	myeloid zinc finger 1 [Source:HGNC Symbol;Acc:HGNC:13108]	MZF1	14.44	12.5092	16.6173	22.5434	18.3504	27.5822
ENSG00000253305	0.642405	5.38461	17.996	2.21365e-05	0.000192792	protocadherin gamma subfamily B, 6 [Source:HGNC Symbol;Acc:HGNC:8713]	PCDHGB6	32.8527	30.4487	34.5735	50.8237	49.5008	52.2902
ENSG00000141527	0.642405	0.108015	5.08248	0.0241688	0.0645292	caspase recruitment domain family member 14 [Source:HGNC Symbol;Acc:HGNC:16446]	CARD14	0.667877	0.754213	0.997038	0.942114	1.07571	1.85566
ENSG00000153714	0.642292	1.45844	7.00028	0.00814969	0.0269609	leucine rich adaptor protein 1 like [Source:HGNC Symbol;Acc:HGNC:31452]	LURAP1L	1.57757	2.65052	2.05105	1.99358	4.24861	3.80608
ENSG00000124839	0.641785	2.31246	8.79635	0.00301833	0.0119946	RAB17, member RAS oncogene family [Source:HGNC Symbol;Acc:HGNC:16523]	RAB17	3.90363	5.83976	2.09853	5.74521	8.20795	3.88504
ENSG00000006062	0.641649	4.14094	11.5777	0.000667463	0.00342933	mitogen-activated protein kinase kinase kinase 14 [Source:HGNC Symbol;Acc:HGNC:6853]	MAP3K14	11.6763	12.757	15.9051	20.5246	14.3187	30.4723
ENSG00000154928	0.641515	0.866616	5.18221	0.0228193	0.061629	EPH receptor B1 [Source:HGNC Symbol;Acc:HGNC:3392]	EPHB1	1.14	1.40068	1.64274	2.68334	1.69944	2.2031
ENSG00000104848	0.641373	-1.73751	2.28326	0.130776	0.242109	potassium voltage-gated channel subfamily A member 7 [Source:HGNC Symbol;Acc:HGNC:6226]	KCNA7	0.230303	0.172392	0.246886	0.344881	0.379663	0.292168
ENSG00000109265	0.641303	1.52435	5.23554	0.0221299	0.0601827	KIAA1211 [Source:HGNC Symbol;Acc:HGNC:29219]	KIAA1211	1.01333	5.96906	0.617214	1.51411	6.53563	1.52401
ENSG00000010818	0.6412	6.75143	19.4935	1.0094e-05	9.91155e-05	human immunodeficiency virus type I enhancer binding protein 2 [Source:HGNC Symbol;Acc:HGNC:4921]	HIVEP2	71.2671	94.8477	87.0272	124.065	144.914	124.163
ENSG00000101407	0.641158	4.45782	16.7703	4.21877e-05	0.000333783	TELO2 interacting protein 1 [Source:HGNC Symbol;Acc:HGNC:29029]	TTI1	18.0212	19.2109	14.3194	26.7914	29.8035	23.555
ENSG00000162522	0.640251	3.45049	12.6814	0.00036932	0.00207662	KIAA1522 [Source:HGNC Symbol;Acc:HGNC:29301]	KIAA1522	6.14908	11.3563	8.44159	12.0204	15.1142	12.35
ENSG00000184281	0.639423	2.92018	4.75363	0.0292365	0.0750706	tumor suppressing subtransferable candidate 4 [Source:HGNC Symbol;Acc:HGNC:12386]	TSSC4	6.14908	5.34414	5.03267	5.56015	7.05992	16.0771
ENSG00000212747	0.638925	3.35878	13.3553	0.000257693	0.00154838	family with sequence similarity 127 member C [Source:HGNC Symbol;Acc:HGNC:33156]	FAM127C	9.70725	7.29432	7.1122	13.2737	12.8724	11.1419
ENSG00000096433	0.63884	5.60195	12.9998	0.000311518	0.00180415	inositol 1,4,5-trisphosphate receptor type 3 [Source:HGNC Symbol;Acc:HGNC:6182]	ITPR3	28.6266	35.6312	47.1836	50.7396	40.1991	88.8269
ENSG00000170382	0.638787	2.06658	8.55724	0.0034415	0.0133924	leucine rich repeat neuronal 2 [Source:HGNC Symbol;Acc:HGNC:16914]	LRRN2	3.01696	4.22359	2.55432	4.81151	6.37291	4.01139
ENSG00000047578	0.638749	5.37273	17.5544	2.79211e-05	0.000235369	KIAA0556 [Source:HGNC Symbol;Acc:HGNC:29068]	KIAA0556	32.3345	37.3443	27.1289	53.2378	59.137	39.2689
ENSG00000143337	0.637773	5.87806	15.4538	8.45453e-05	0.000604299	torsin 1A interacting protein 1 [Source:HGNC Symbol;Acc:HGNC:29456]	TOR1AIP1	44.4023	46.2548	46.0726	55.3576	84.5112	76.1137
ENSG00000063015	0.637734	0.435123	5.25957	0.0218263	0.0595146	seizure related 6 homolog [Source:HGNC Symbol;Acc:HGNC:15955]	SEZ6	0.967271	1.23906	0.892586	1.9347	1.71752	1.21605
ENSG00000147324	0.637692	4.91335	17.2192	3.33054e-05	0.000273148	malignant fibrous histiocytoma amplified sequence 1 [Source:HGNC Symbol;Acc:HGNC:16982]	MFHAS1	19.6448	23.887	27.2334	31.0309	37.8849	40.9509
ENSG00000146005	0.637635	-2.75075	1.29821	0.254541	0.396368	pleckstrin and Sec7 domain containing 2 [Source:HGNC Symbol;Acc:HGNC:19092]	PSD2	0.172727	0.0323234	0.104452	0.185058	0.0723168	0.197411
ENSG00000131323	0.637405	3.56314	14.5141	0.000139114	0.000919677	TNF receptor associated factor 3 [Source:HGNC Symbol;Acc:HGNC:12033]	TRAF3	7.77271	11.9381	7.7674	12.5839	19.869	10.8418
ENSG00000164841	0.637298	1.15138	5.58265	0.0181393	0.0516492	transmembrane protein 74 [Source:HGNC Symbol;Acc:HGNC:26409]	TMEM74	2.71757	2.30574	0.47478	3.39834	3.25425	1.08181
ENSG00000134815	0.637148	3.94623	15.0636	0.000103949	0.000721206	DExH-box helicase 34 [Source:HGNC Symbol;Acc:HGNC:16719]	DHX34	12.3557	11.4102	12.3538	17.6478	18.6396	19.9148
ENSG00000070601	0.636972	0.691015	5.79457	0.0160757	0.0469669	FERM and PDZ domain containing 1 [Source:HGNC Symbol;Acc:HGNC:29159]	FRMPD1	1.49697	0.969702	1.21544	2.74222	1.53673	1.57139
ENSG00000140577	0.636615	5.59176	17.565	2.77658e-05	0.00023446	CREB regulated transcription coactivator 3 [Source:HGNC Symbol;Acc:HGNC:26148]	CRTC3	37.8157	38.8851	36.2162	66.0405	57.8715	52.3691
ENSG00000015532	0.636494	4.8775	16.8077	4.13651e-05	0.000328807	xylosyltransferase 2 [Source:HGNC Symbol;Acc:HGNC:15517]	XYLT2	22.1206	20.493	26.3028	32.2169	33.2567	41.8037
ENSG00000161914	0.636375	1.3429	6.30317	0.0120522	0.0371847	zinc finger protein 653 [Source:HGNC Symbol;Acc:HGNC:25196]	ZNF653	2.37212	1.75624	1.79467	2.80111	3.01019	3.33229
ENSG00000058668	0.636278	8.3708	18.3695	1.8195e-05	0.000163074	ATPase plasma membrane Ca2+ transporting 4 [Source:HGNC Symbol;Acc:HGNC:817]	ATP2B4	193.063	391.652	204.374	363.387	534.728	298.801
ENSG00000169918	0.63616	2.34128	8.12171	0.00437384	0.0162775	OTU deubiquitinase 7A [Source:HGNC Symbol;Acc:HGNC:20718]	OTUD7A	5.21635	3.93268	2.64927	8.87438	4.68251	4.90368
ENSG00000180834	0.636143	1.524	7.37775	0.00660359	0.0226261	MAP6 domain containing 1 [Source:HGNC Symbol;Acc:HGNC:25753]	MAP6D1	2.61393	2.14412	1.9466	3.98716	3.18194	3.22964
ENSG00000214265	0.63586	-0.551392	3.866	0.0492737	0.113474			0.713938	0.344783	0.455789	1.30382	0.524297	0.608025
ENSG00000204469	0.635818	7.25225	16.0264	6.24661e-05	0.000466024	proline rich coiled-coil 2A [Source:HGNC Symbol;Acc:HGNC:13918]	PRRC2A	105.985	125.372	124.126	180.255	229.208	149.629
ENSG00000188582	0.63549	3.70424	13.5305	0.000234716	0.00143453	progestin and adipoQ receptor family member 9 [Source:HGNC Symbol;Acc:HGNC:30131]	PAQR9	10.2945	8.29634	11.955	13.3158	14.9876	19.1804
ENSG00000163126	0.635265	3.28607	10.099	0.00148349	0.00667473	ankyrin repeat domain 23 [Source:HGNC Symbol;Acc:HGNC:24470]	ANKRD23	9.26968	9.13675	3.42791	20.0788	11.9955	4.48517
ENSG00000234965	0.635154	-0.864364	3.26121	0.0709368	0.150952	shisa family member 8 [Source:HGNC Symbol;Acc:HGNC:18351]	SHISA8	0.299393	0.204715	0.731161	0.412175	0.388703	1.08181
ENSG00000187720	0.635097	8.26178	18.7311	1.50508e-05	0.000138854	thrombospondin type 1 domain containing 4 [Source:HGNC Symbol;Acc:HGNC:25835]	THSD4	224.223	227.104	269.58	416.784	332.232	371.495
ENSG00000101230	0.635005	0.622082	5.41959	0.019912	0.0555518	isthmin 1 [Source:HGNC Symbol;Acc:HGNC:16213]	ISM1	0.564241	0.797311	2.19348	0.757056	1.51865	3.19805
ENSG00000135482	0.634487	1.75346	5.07365	0.0242921	0.0647615	zinc finger CCCH-type containing 10 [Source:HGNC Symbol;Acc:HGNC:25893]	ZC3H10	3.01696	1.42223	3.61782	5.40874	3.2181	3.37967
ENSG00000117298	0.634477	6.43009	21.3293	3.86779e-06	4.28048e-05	endothelin converting enzyme 1 [Source:HGNC Symbol;Acc:HGNC:3146]	ECE1	62.4811	48.8083	91.756	93.6478	79.0422	141.441
ENSG00000107736	0.634379	4.93998	15.4908	8.29075e-05	0.000595247	cadherin related 23 [Source:HGNC Symbol;Acc:HGNC:13733]	CDH23	28.6036	24.5335	18.7728	48.1403	32.2533	31.72
ENSG00000166289	0.634278	5.03625	11.5807	0.000666404	0.00342499	pleckstrin homology and FYVE domain containing 1 [Source:HGNC Symbol;Acc:HGNC:20764]	PLEKHF1	37.7351	24.889	13.3508	48.2833	54.7528	17.7591
ENSG00000124257	0.634225	0.791785	5.77623	0.0162443	0.0473387	neuralized E3 ubiquitin protein ligase 2 [Source:HGNC Symbol;Acc:HGNC:16156]	NEURL2	1.49697	1.08822	1.36737	2.11134	1.4373	2.71637
ENSG00000168874	0.634182	5.96301	17.9528	2.26446e-05	0.000196896	atonal bHLH transcription factor 8 [Source:HGNC Symbol;Acc:HGNC:24126]	ATOH8	68.2386	48.6144	30.8227	95.5068	82.3417	48.6262
ENSG00000014164	0.634123	3.48327	14.3964	0.000148085	0.00096899	zinc finger CCCH-type containing 3 [Source:HGNC Symbol;Acc:HGNC:28972]	ZC3H3	8.78604	8.53338	8.88788	13.0298	14.617	13.0844
ENSG00000182318	0.634019	2.10192	7.87157	0.00502181	0.0181576	zinc finger and SCAN domain containing 22 [Source:HGNC Symbol;Acc:HGNC:4929]	ZSCAN22	2.77515	3.67409	3.60833	5.17321	5.58647	4.77734
ENSG00000188997	0.63399	3.0523	12.4355	0.000421255	0.00232699	potassium channel tetramerization domain containing 21 [Source:HGNC Symbol;Acc:HGNC:27452]	KCTD21	6.41392	6.42158	6.58045	10.481	10.5311	9.18355
ENSG00000172350	0.633955	0.182561	5.09467	0.0239994	0.064152	ATP binding cassette subfamily G member 4 [Source:HGNC Symbol;Acc:HGNC:13884]	ABCG4	1.00182	0.948153	0.674187	1.56458	1.23842	1.23974
ENSG00000100324	0.633944	4.41363	16.19	5.72973e-05	0.000434543	TGF-beta activated kinase 1 (MAP3K7) binding protein 1 [Source:HGNC Symbol;Acc:HGNC:18157]	TAB1	17.2266	15.4183	17.3959	25.2352	24.4611	27.9692
ENSG00000105650	0.633559	2.24966	3.71867	0.0538073	0.121737	phosphodiesterase 4C [Source:HGNC Symbol;Acc:HGNC:8782]	PDE4C	5.34302	1.89631	3.93118	3.68434	4.26669	9.23882
ENSG00000262919	0.633488	4.1661	13.6208	0.000223693	0.00137713	family with sequence similarity 58 member A [Source:HGNC Symbol;Acc:HGNC:28434]	FAM58A	18.2169	15.7092	9.02082	24.3183	23.1323	17.1826
ENSG00000196391	0.633129	3.00728	10.9253	0.000948601	0.00460228	zinc finger protein 774 [Source:HGNC Symbol;Acc:HGNC:33108]	ZNF774	7.6921	7.27277	4.19705	10.4558	10.3865	8.10174
ENSG00000175505	0.632516	0.616495	5.74751	0.016512	0.0479531	cardiotrophin-like cytokine factor 1 [Source:HGNC Symbol;Acc:HGNC:17412]	CLCF1	1.07091	0.958928	1.52879	1.89264	1.50057	2.07676
ENSG00000262484	0.632282	-1.88399	1.79098	0.180807	0.307976	coiled-coil glutamate rich protein 2 [Source:HGNC Symbol;Acc:HGNC:44662]	CCER2	0.230303	0.129294	0.189912	0.294411	0.126554	0.505371
ENSG00000198719	0.632219	3.57255	13.7971	0.00020365	0.0012738	delta like canonical Notch ligand 1 [Source:HGNC Symbol;Acc:HGNC:2908]	DLL1	11.3769	6.24919	10.2078	15.6542	9.4283	18.2881
ENSG00000173261	0.63214	-2.33892	1.73448	0.187839	0.317022	PLAC8 like 1 [Source:HGNC Symbol;Acc:HGNC:31746]	PLAC8L1	0.149697	0.118519	0.142434	0.201882	0.171752	0.268479
ENSG00000001167	0.631452	4.53728	14.7788	0.000120887	0.000817224	nuclear transcription factor Y subunit alpha [Source:HGNC Symbol;Acc:HGNC:7804]	NFYA	17.0769	19.9759	17.3864	31.8384	28.8996	23.9815
ENSG00000253537	0.631386	5.11297	16.7785	4.20062e-05	0.00033265	protocadherin gamma subfamily A, 7 [Source:HGNC Symbol;Acc:HGNC:8705]	PCDHGA7	28.5345	23.3914	29.6453	43.6737	38.7708	43.4541
ENSG00000105127	0.631176	4.9243	16.9456	3.84661e-05	0.000309759	A-kinase anchoring protein 8 [Source:HGNC Symbol;Acc:HGNC:378]	AKAP8	24.2163	23.3052	23.8719	35.1694	37.1527	38.3056
ENSG00000183718	0.631158	4.33476	8.83362	0.00295732	0.0118064	tripartite motif containing 52 [Source:HGNC Symbol;Acc:HGNC:19024]	TRIM52	20.1745	7.56368	22.2387	26.7745	18.938	25.2133
ENSG00000147912	0.630751	3.79882	14.9303	0.000111555	0.000763963	F-box protein 10 [Source:HGNC Symbol;Acc:HGNC:13589]	FBXO10	10.8472	11.3563	10.5021	16.6468	17.5911	16.4009
ENSG00000178297	0.630429	0.951761	5.57238	0.018246	0.0518701	transmembrane protease, serine 9 [Source:HGNC Symbol;Acc:HGNC:30079]	TMPRSS9	1.32424	1.61617	1.5098	2.16181	1.86216	2.96116
ENSG00000242732	0.630266	2.66354	7.99684	0.00468591	0.0171678	retrotransposon gag domain containing 4 [Source:HGNC Symbol;Acc:HGNC:29430]	RGAG4	3.16666	6.00138	6.01071	7.03221	8.10852	7.5253
ENSG00000167716	0.630152	5.61529	17.5399	2.81341e-05	0.000236791	WD repeat domain 81 [Source:HGNC Symbol;Acc:HGNC:26600]	WDR81	37.3896	42.6454	35.0767	52.8173	69.7947	56.2384
ENSG00000169155	0.629746	4.01443	9.83148	0.00171551	0.00755039	zinc finger and BTB domain containing 43 [Source:HGNC Symbol;Acc:HGNC:17908]	ZBTB43	12.7703	11.6688	12.8855	17.3282	26.7934	15.3665
ENSG00000186994	0.629696	4.41001	14.5313	0.000137847	0.000912489	KN motif and ankyrin repeat domains 3 [Source:HGNC Symbol;Acc:HGNC:24796]	KANK3	19.6909	10.5051	19.6369	25.9754	16.5244	35.0365
ENSG00000181754	0.629484	4.81439	17.5806	2.75382e-05	0.000232753	adhesion molecule with Ig like domain 1 [Source:HGNC Symbol;Acc:HGNC:20824]	AMIGO1	21.2109	23.4883	21.4411	32.6627	37.9573	31.9016
ENSG00000213638	0.629386	0.575438	2.19273	0.138663	0.252653	adenosine deaminase, tRNA specific 3 [Source:HGNC Symbol;Acc:HGNC:25151]	ADAT3	1.14	1.04512	0.940064	0.580409	2.67572	2.40051
ENSG00000232593	0.629379	2.56923	9.69214	0.00185058	0.00802271	KDM5C adjacent non-coding transcript [Source:HGNC Symbol;Acc:HGNC:49510]	KANTR	4.19151	5.5704	4.21605	6.58638	7.63846	7.24892
ENSG00000114841	0.62929	4.88486	14.6328	0.000130619	0.000872516	dynein axonemal heavy chain 1 [Source:HGNC Symbol;Acc:HGNC:2940]	DNAH1	18.3206	25.0937	26.0464	30.9888	32.0815	44.5596
ENSG00000187624	0.62923	1.19835	6.20024	0.0127733	0.0389372	chromosome 17 open reading frame 97 [Source:HGNC Symbol;Acc:HGNC:33800]	C17orf97	2.30303	0.840409	2.32642	3.28899	1.60905	3.22964
ENSG00000275778	0.629194	0.973636	6.23761	0.0125065	0.0383322			1.39333	2.45658	0.79763	2.33846	3.38985	1.28712
ENSG00000143195	0.629006	4.49585	8.31303	0.00393617	0.0149543	immunoglobulin like domain containing receptor 2 [Source:HGNC Symbol;Acc:HGNC:18131]	ILDR2	10.0757	38.1201	5.46946	25.6726	49.8534	6.08025
ENSG00000126368	0.62869	4.15837	11.2673	0.000788862	0.00394185	nuclear receptor subfamily 1 group D member 1 [Source:HGNC Symbol;Acc:HGNC:7962]	NR1D1	3.18969	16.7004	22.7799	6.10692	19.0283	39.111
ENSG00000124507	0.628355	2.86255	11.0986	0.000863928	0.00426245	protein kinase C and casein kinase substrate in neurons 1 [Source:HGNC Symbol;Acc:HGNC:8570]	PACSIN1	6.28726	5.79666	4.94721	9.67349	9.65429	7.13048
ENSG00000176410	0.628342	3.95672	13.7304	0.000211007	0.00131027	DnaJ heat shock protein family (Hsp40) member C30 [Source:HGNC Symbol;Acc:HGNC:16410]	DNAJC30	15.0272	9.63238	12.0689	21.8957	17.6814	16.7009
ENSG00000166987	0.628189	3.03619	7.32309	0.00680741	0.0231759	methyl-CpG binding domain protein 6 [Source:HGNC Symbol;Acc:HGNC:20445]	MBD6	5.43514	6.20609	7.15968	12.4409	6.10173	11.6867
ENSG00000131015	0.62765	-1.3181	2.63916	0.104259	0.204057	UL16 binding protein 2 [Source:HGNC Symbol;Acc:HGNC:14894]	ULBP2	0.356969	0.226264	0.313355	0.420587	0.479099	0.473786
ENSG00000089199	0.62709	1.74638	6.99335	0.00818133	0.0270321	chromogranin B [Source:HGNC Symbol;Acc:HGNC:1930]	CHGB	2.77515	0.60337	4.40596	4.12175	0.931078	7.0752
ENSG00000120500	0.627082	-1.34747	2.16495	0.141189	0.256033	arrestin 3 [Source:HGNC Symbol;Acc:HGNC:710]	ARR3	0.172727	0.269362	0.446293	0.504704	0.388703	0.426407
ENSG00000100106	0.626535	6.68629	19.7943	8.62413e-06	8.67715e-05	TRIO and F-actin binding protein [Source:HGNC Symbol;Acc:HGNC:17009]	TRIOBP	76.2762	84.1055	82.4788	118.395	127.16	129.328
ENSG00000103227	0.62634	2.8403	9.00107	0.00269821	0.0109465	lipase maturation factor 1 [Source:HGNC Symbol;Acc:HGNC:14154]	LMF1	4.73272	6.5832	5.53593	8.51267	7.48478	9.9495
ENSG00000100565	0.626214	-2.20105	1.59398	0.206758	0.340839	leucine rich repeat containing 74A [Source:HGNC Symbol;Acc:HGNC:23346]	LRRC74A	0.0690908	0.19394	0.208903	0.218705	0.207911	0.268479
ENSG00000088256	0.625703	6.2293	3.70693	0.0541869	0.122337	G protein subunit alpha 11 [Source:HGNC Symbol;Acc:HGNC:4379]	GNA11	81.1471	63.8711	33.377	51.7742	107.951	111.892
ENSG00000215421	0.625197	6.28932	20.2769	6.70032e-06	6.93621e-05	zinc finger protein 407 [Source:HGNC Symbol;Acc:HGNC:19904]	ZNF407	63.9205	64.7869	55.6157	92.9664	106.351	85.4788
ENSG00000165716	0.625138	4.27243	14.8805	0.000114544	0.000780095	family with sequence similarity 69 member B [Source:HGNC Symbol;Acc:HGNC:28290]	FAM69B	15.3381	13.8344	16.3229	20.9116	23.295	26.0819
ENSG00000106608	0.624959	4.88183	6.25496	0.0123846	0.0380053	upregulator of cell proliferation [Source:HGNC Symbol;Acc:HGNC:30890]	URGCP	25.4715	18.2304	23.9669	24.1248	52.2941	32.6596
ENSG00000106346	0.624942	3.65739	15.0097	0.000106958	0.000736256	ubiquitin specific peptidase 42 [Source:HGNC Symbol;Acc:HGNC:20068]	USP42	10.0182	10.3866	9.32468	14.9813	15.8735	14.9637
ENSG00000148926	0.624939	3.9924	13.1083	0.000293997	0.00171883	adrenomedullin [Source:HGNC Symbol;Acc:HGNC:259]	ADM	19.5872	6.86334	12.1544	24.9744	12.5741	19.1883
ENSG00000166546	0.624929	1.62658	3.82469	0.0505028	0.115653	brain expressed, associated with NEDD4, 1 [Source:HGNC Symbol;Acc:HGNC:24160]	BEAN1	2.79818	1.99328	2.05105	2.7254	2.44973	6.32504
ENSG00000166507	0.624802	3.5947	9.32953	0.0022549	0.00944949	N-deacetylase and N-sulfotransferase 2 [Source:HGNC Symbol;Acc:HGNC:7681]	NDST2	11.6303	6.20609	11.2238	14.2663	14.4634	14.5373
ENSG00000204970	0.624488	-2.69554	0.885929	0.346583	0.495064	protocadherin alpha 1 [Source:HGNC Symbol;Acc:HGNC:8663]	PCDHA1	0.184242	0.0323234	0.104452	0.168235	0.244069	0.0789643
ENSG00000031081	0.624313	6.84113	19.3045	1.11443e-05	0.000107453	Rho GTPase activating protein 31 [Source:HGNC Symbol;Acc:HGNC:29216]	ARHGAP31	88.3786	78.061	103.749	145.986	113.899	157.668
ENSG00000106479	0.62426	4.30671	15.4381	8.52509e-05	0.000608543	zinc finger protein 862 [Source:HGNC Symbol;Acc:HGNC:34519]	ZNF862	15.1885	13.7698	17.5764	25.3025	19.634	27.0926
ENSG00000189377	0.624225	-1.5261	2.48777	0.114734	0.219633	C-X-C motif chemokine ligand 17 [Source:HGNC Symbol;Acc:HGNC:19232]	CXCL17	0.322424	0.172392	0.275372	0.48788	0.334465	0.355339
ENSG00000177946	0.624208	2.7304	10.0043	0.00156174	0.00698491	CENPB DNA-binding domain containing 1 [Source:HGNC Symbol;Acc:HGNC:28272]	CENPBD1	6.17211	4.79464	4.70032	8.2435	8.33451	7.42264
ENSG00000141639	0.62384	6.06468	14.4927	0.000140707	0.000929062	mitogen-activated protein kinase 4 [Source:HGNC Symbol;Acc:HGNC:6878]	MAPK4	50.7702	49.2824	56.9546	99.7884	71.5755	73.0657
ENSG00000100426	0.623623	4.67353	15.9112	6.63839e-05	0.000492045	zinc finger BED-type containing 4 [Source:HGNC Symbol;Acc:HGNC:20721]	ZBED4	19.2303	21.0318	19.8553	30.4421	34.0974	28.3008
ENSG00000162073	0.623607	2.02216	7.71313	0.00548205	0.019466	progestin and adipoQ receptor family member 4 [Source:HGNC Symbol;Acc:HGNC:26386]	PAQR4	4.99756	2.58587	2.03206	7.41073	3.62488	3.58498
ENSG00000185504	0.623551	4.38663	15.4215	8.6004e-05	0.000613084	Fanconi anemia core complex associated protein 100 [Source:HGNC Symbol;Acc:HGNC:26171]	FAAP100	14.1291	16.1509	19.1336	23.5192	23.5481	28.8457
ENSG00000177469	0.623397	8.99859	19.1672	1.19751e-05	0.000113937	polymerase I and transcript release factor [Source:HGNC Symbol;Acc:HGNC:9688]	PTRF	379.066	468.905	347.824	504.443	826.653	541.948
ENSG00000184271	0.62324	3.02995	12.0733	0.000511492	0.00274411	POU class 6 homeobox 1 [Source:HGNC Symbol;Acc:HGNC:9224]	POU6F1	5.60787	6.0337	7.61547	9.07626	9.16615	11.3314
ENSG00000156304	0.623065	4.47213	13.0223	0.00030781	0.00178719	SR-related CTD associated factor 4 [Source:HGNC Symbol;Acc:HGNC:19304]	SCAF4	16.3515	18.586	17.2155	31.3085	23.06	26.4767
ENSG00000021300	0.623021	3.08037	10.3508	0.00129419	0.00594253	pleckstrin homology domain containing B1 [Source:HGNC Symbol;Acc:HGNC:19079]	PLEKHB1	9.03937	6.22764	4.99468	10.9184	9.82604	9.60206
ENSG00000132622	0.622944	4.98794	15.1777	9.7853e-05	0.000685345	heat shock protein family A (Hsp70) member 12B [Source:HGNC Symbol;Acc:HGNC:16193]	HSPA12B	27.6133	17.8317	29.2749	36.9864	28.3934	50.1186
ENSG00000126882	0.622571	5.36531	16.3626	5.23059e-05	0.000402788	family with sequence similarity 78 member A [Source:HGNC Symbol;Acc:HGNC:25465]	FAM78A	35.6163	24.6843	37.4506	50.605	41.3652	57.4307
ENSG00000172403	0.622284	9.27552	18.4349	1.75806e-05	0.000158631	synaptopodin 2 [Source:HGNC Symbol;Acc:HGNC:17732]	SYNPO2	490.141	504.385	458.077	866.274	813.292	586.105
ENSG00000173706	0.621879	8.53506	16.7698	4.21994e-05	0.000333783	heart development protein with EGF like domains 1 [Source:HGNC Symbol;Acc:HGNC:29227]	HEG1	268.671	370.62	235.339	518.272	508.034	324.591
ENSG00000137766	0.62181	-0.869095	3.21817	0.072825	0.154144	unc-13 homolog C [Source:HGNC Symbol;Acc:HGNC:23149]	UNC13C	0.460605	0.183166	0.588727	0.672938	0.298307	0.915986
ENSG00000124006	0.621696	7.61076	19.2863	1.12509e-05	0.00010822	obscurin like 1 [Source:HGNC Symbol;Acc:HGNC:29092]	OBSL1	160.786	139.249	162.479	230.666	237.009	242.428
ENSG00000253159	0.621655	4.68498	15.8213	6.96144e-05	0.000512435	protocadherin gamma subfamily A, 12 [Source:HGNC Symbol;Acc:HGNC:8699]	PCDHGA12	20.4739	19.2217	20.9948	29.1382	30.6713	33.6704
ENSG00000125845	0.621509	3.33592	12.864	0.000334959	0.00190751	bone morphogenetic protein 2 [Source:HGNC Symbol;Acc:HGNC:1069]	BMP2	8.9818	7.30509	7.56799	12.483	12.4204	11.6709
ENSG00000138771	0.621232	5.73224	17.2172	3.334e-05	0.000273285	shroom family member 3 [Source:HGNC Symbol;Acc:HGNC:30422]	SHROOM3	45.4617	54.6481	25.0019	66.7471	88.8592	38.1082
ENSG00000213471	0.621011	-1.12286	1.52815	0.21639	0.352403	tubulin tyrosine ligase like 13, pseudogene [Source:HGNC Symbol;Acc:HGNC:32484]	TTLL13P	0.149697	0.323234	0.531753	0.723409	0.22599	0.631714
ENSG00000103199	0.620747	3.62897	14.2233	0.000162347	0.00104819	zinc finger protein 500 [Source:HGNC Symbol;Acc:HGNC:23716]	ZNF500	10.8357	9.58928	8.82141	14.8046	15.5029	14.5215
ENSG00000100605	0.620329	6.15175	18.4695	1.72645e-05	0.000156219	inositol-tetrakisphosphate 1-kinase [Source:HGNC Symbol;Acc:HGNC:6177]	ITPK1	64.2314	53.2905	51.0198	89.1055	86.066	82.723
ENSG00000129933	0.620103	5.74464	16.1872	5.73806e-05	0.000434969	MAU2 sister chromatid cohesion factor [Source:HGNC Symbol;Acc:HGNC:29140]	MAU2	42.1338	36.644	47.1456	58.4952	55.024	82.0834
ENSG00000187715	0.620015	5.98251	11.9673	0.000541417	0.00287577	kelch repeat and BTB domain containing 12 [Source:HGNC Symbol;Acc:HGNC:25731]	KBTBD12	47.4884	76.1324	29.6263	59.3448	102.554	64.0953
ENSG00000148331	0.619948	4.30409	15.4278	8.5718e-05	0.00061159	ankyrin repeat and SOCS box containing 6 [Source:HGNC Symbol;Acc:HGNC:17181]	ASB6	14.4975	16.4742	15.6392	21.3406	24.8318	25.5765
ENSG00000189420	0.619179	1.20932	6.36724	0.0116246	0.0361157	ZFP92 zinc finger protein [Source:HGNC Symbol;Acc:HGNC:12865]	ZFP92	2.02666	1.76701	1.58576	3.44881	2.63052	2.26628
ENSG00000169989	0.619034	-1.0456	2.45173	0.117396	0.223295	tigger transposable element derived 4 [Source:HGNC Symbol;Acc:HGNC:18335]	TIGD4	0.264848	0.344783	0.47478	0.496292	0.759326	0.426407
ENSG00000117400	0.619002	-1.34293	2.48077	0.115246	0.220243	MPL proto-oncogene, thrombopoietin receptor [Source:HGNC Symbol;Acc:HGNC:7217]	MPL	0.414545	0.172392	0.284868	0.513116	0.235029	0.600129
ENSG00000172081	0.618997	3.41269	13.7067	0.000213688	0.0013247	MOB kinase activator 3A [Source:HGNC Symbol;Acc:HGNC:29802]	MOB3A	7.78422	7.71452	9.62854	11.625	12.2035	14.7663
ENSG00000160785	0.618907	4.40357	10.2417	0.00137299	0.00624883	solute carrier family 25 member 44 [Source:HGNC Symbol;Acc:HGNC:29036]	SLC25A44	15.4188	11.8842	23.9479	24.1248	25.0126	26.4215
ENSG00000169635	0.618703	3.19029	10.037	0.0015343	0.00688331	HIC ZBTB transcriptional repressor 2 [Source:HGNC Symbol;Acc:HGNC:18595]	HIC2	7.9915	7.62832	5.97273	10.725	10.0611	12.2316
ENSG00000100105	0.618638	4.61886	16.0998	6.00889e-05	0.000450596	POZ/BTB and AT hook containing zinc finger 1 [Source:HGNC Symbol;Acc:HGNC:13071]	PATZ1	16.4897	17.9395	23.663	24.5623	28.9448	35.6445
ENSG00000139613	0.618416	6.36308	18.9914	1.31307e-05	0.000123197	SWI/SNF related, matrix associated, actin dependent regulator of chromatin subfamily c member 2 [Source:HGNC Symbol;Acc:HGNC:11105]	SMARCC2	64.6574	63.9034	65.7	108.427	87.3767	103.656
ENSG00000175727	0.618317	6.08716	12.8845	0.000331322	0.00189217	MLX interacting protein [Source:HGNC Symbol;Acc:HGNC:17055]	MLXIP	48.1563	59.7444	52.4727	97.0041	70.5902	79.7776
ENSG00000166924	0.618224	-0.0836726	4.0533	0.0440852	0.103846	neuronal tyrosine phosphorylated phosphoinositide-3-kinase adaptor 1 [Source:HGNC Symbol;Acc:HGNC:22009]	NYAP1	0.564241	1.16364	0.38932	0.639292	2.1243	0.6633
ENSG00000197483	0.617853	0.397615	5.30841	0.0212227	0.0582193	zinc finger protein 628 [Source:HGNC Symbol;Acc:HGNC:28054]	ZNF628	0.909695	1.16364	0.987542	1.45523	1.76272	1.47663
ENSG00000135144	0.617826	1.4223	6.40497	0.0113801	0.0354937	deltex E3 ubiquitin ligase 1 [Source:HGNC Symbol;Acc:HGNC:3060]	DTX1	1.81939	1.16364	3.07657	2.5067	1.62713	5.67753
ENSG00000173327	0.617741	5.43649	15.3273	9.03998e-05	0.000640148	mitogen-activated protein kinase kinase kinase 11 [Source:HGNC Symbol;Acc:HGNC:6850]	MAP3K11	28.4078	27.9597	43.9741	42.8998	37.0081	79.3828
ENSG00000159307	0.617689	-0.808537	2.70099	0.100286	0.198136	signal peptide, CUB domain and EGF like domain containing 1 [Source:HGNC Symbol;Acc:HGNC:13441]	SCUBE1	0.667877	0.0538724	0.655196	0.900055	0.171752	0.821229
ENSG00000139656	0.617369	-2.18109	1.4886	0.222434	0.359389	small integral membrane protein 2 [Source:HGNC Symbol;Acc:HGNC:28776]	SMIM2	0.253333	0.0754213	0.161425	0.260764	0.253109	0.197411
ENSG00000130528	0.617232	9.57849	21.2594	4.01131e-06	4.42099e-05	histidine rich calcium binding protein [Source:HGNC Symbol;Acc:HGNC:5178]	HRC	604.222	447.679	752.422	887.917	682.137	1212.8
ENSG00000235173	0.617191	2.36183	7.19508	0.00731038	0.0245956	HGH1 homolog [Source:HGNC Symbol;Acc:HGNC:24161]	HGH1	4.90544	3.72797	3.46589	5.68633	7.6475	5.26692
ENSG00000141524	0.616922	5.9833	17.6624	2.63793e-05	0.000224736	transmembrane channel like 6 [Source:HGNC Symbol;Acc:HGNC:18021]	TMC6	50.5399	55.5424	43.9266	77.1187	81.727	70.5704
ENSG00000104524	0.616497	2.14817	7.49683	0.00618076	0.0214852	pyrroline-5-carboxylate reductase-like [Source:HGNC Symbol;Acc:HGNC:25846]	PYCRL	3.71939	3.14615	3.56085	4.66851	5.64071	5.70122
ENSG00000095370	0.616139	4.74058	14.7764	0.00012104	0.000817393	SH2 domain containing 3C [Source:HGNC Symbol;Acc:HGNC:16884]	SH2D3C	24.5848	15.7092	23.5491	33.9834	28.312	34.0968
ENSG00000104941	0.616129	-2.70262	1.29038	0.255977	0.39814	radial spoke head 6 homolog A [Source:HGNC Symbol;Acc:HGNC:14241]	RSPH6A	0.0806059	0.118519	0.104452	0.0757056	0.244069	0.173721
ENSG00000175414	0.615987	4.75457	11.2457	0.000798079	0.0039817	ADP ribosylation factor like GTPase 10 [Source:HGNC Symbol;Acc:HGNC:22042]	ARL10	18.7581	30.481	15.117	39.4426	36.1584	21.8652
ENSG00000198885	0.615737	0.961996	5.67312	0.0172268	0.0496366	inositol 1,4,5-trisphosphate receptor interacting protein-like 1 [Source:HGNC Symbol;Acc:HGNC:29371]	ITPRIPL1	1.46242	1.52997	1.5193	1.95993	2.10623	2.94537
ENSG00000198888	0.615488	9.47658	4.75712	0.0291774	0.0749432	mitochondrially encoded NADH:ubiquinone oxidoreductase core subunit 1 [Source:HGNC Symbol;Acc:HGNC:7455]	MT-ND1	573.361	601.345	375.361	1644.69	426.136	653.445
ENSG00000006788	0.615002	-0.373326	2.48184	0.115167	0.220129	myosin heavy chain 13 [Source:HGNC Symbol;Acc:HGNC:7571]	MYH13	0.184242	1.49765	0.38932	0.580409	1.22035	0.647507
ENSG00000205835	0.614974	-1.66968	1.87405	0.171012	0.295563	geminin coiled-coil domain containing [Source:HGNC Symbol;Acc:HGNC:40049]	GMNC	0.195757	0.0646468	0.446293	0.428998	0.108475	0.481682
ENSG00000060491	0.614545	5.233	16.248	5.55689e-05	0.000423237	opioid growth factor receptor [Source:HGNC Symbol;Acc:HGNC:15768]	OGFR	27.6593	28.0244	33.1206	40.4688	41.9708	54.2327
ENSG00000167994	0.614298	2.67617	9.54113	0.00200918	0.00861346	RAB3A interacting protein like 1 [Source:HGNC Symbol;Acc:HGNC:9780]	RAB3IL1	3.63878	4.82696	6.77036	6.46021	7.03281	9.43623
ENSG00000134107	0.6141	5.32438	14.1554	0.00016831	0.00108276	basic helix-loop-helix family member e40 [Source:HGNC Symbol;Acc:HGNC:1046]	BHLHE40	10.3982	20.0944	64.3802	18.5142	25.8804	100.885
ENSG00000187801	0.614059	0.451494	4.29107	0.038313	0.0932321	ZFP69 zinc finger protein B [Source:HGNC Symbol;Acc:HGNC:28053]	ZFP69B	0.794544	1.07745	1.31989	1.58141	1.93447	1.34239
ENSG00000166707	0.613934	-0.694542	3.3188	0.0684918	0.146735	zinc finger CCHC-type containing 18 [Source:HGNC Symbol;Acc:HGNC:32459]	ZCCHC18	0.230303	0.592596	0.550745	0.285999	0.90396	0.987054
ENSG00000184887	0.613448	4.08602	14.6095	0.000132247	0.000882288	BTB domain containing 6 [Source:HGNC Symbol;Acc:HGNC:19897]	BTBD6	13.8297	12.8432	13.5407	19.7592	20.4656	21.2967
ENSG00000196428	0.6134	6.40703	19.3918	1.06464e-05	0.00010365	TSC22 domain family member 2 [Source:HGNC Symbol;Acc:HGNC:29095]	TSC22D2	67.398	72.9539	60.1831	100.007	120.688	87.7846
ENSG00000110944	0.61334	-2.4625	1.31431	0.251615	0.392957	interleukin 23 subunit alpha [Source:HGNC Symbol;Acc:HGNC:15488]	IL23A	0.0460605	0.161617	0.161425	0.092529	0.144634	0.339546
ENSG00000197530	0.613253	5.80288	14.5157	0.000138994	0.000919263	mindbomb E3 ubiquitin protein ligase 2 [Source:HGNC Symbol;Acc:HGNC:30577]	MIB2	47.6496	39.0898	44.4204	68.135	52.1494	83.3389
ENSG00000171467	0.613133	5.28134	15.8561	6.83458e-05	0.000504487	zinc finger protein 318 [Source:HGNC Symbol;Acc:HGNC:13578]	ZNF318	26.5999	35.4049	30.3479	45.0532	52.5743	43.2014
ENSG00000136854	0.613035	4.16849	8.52011	0.00351244	0.0136156	syntaxin binding protein 1 [Source:HGNC Symbol;Acc:HGNC:11444]	STXBP1	12.4479	13.3819	15.6962	27.0269	13.3605	25.7897
ENSG00000167595	0.612788	1.9718	6.83139	0.00895693	0.0291323	proline and serine rich 3 [Source:HGNC Symbol;Acc:HGNC:25204]	PROSER3	2.79818	3.95423	2.56381	5.17321	4.78195	4.11404
ENSG00000185668	0.612776	-2.73635	1.0838	0.297849	0.444044	POU class 3 homeobox 1 [Source:HGNC Symbol;Acc:HGNC:9214]	POU3F1	0.0460605	0.19394	0.047478	0.0420587	0.388703	0.0710679
ENSG00000107859	0.612422	0.428659	4.20341	0.0403427	0.0968962	paired like homeodomain 3 [Source:HGNC Symbol;Acc:HGNC:9006]	PITX3	1.49697	1.70237	0.132938	1.85058	2.49493	0.315857
ENSG00000213918	0.612227	4.86336	13.8491	0.000198086	0.00124581	deoxyribonuclease 1 [Source:HGNC Symbol;Acc:HGNC:2956]	DNASE1	20.3127	22.4324	26.1129	36.591	29.0894	39.9322
ENSG00000079435	0.612144	4.56888	14.9914	0.000108	0.000743108	lipase E, hormone sensitive type [Source:HGNC Symbol;Acc:HGNC:6621]	LIPE	18.8157	18.8122	18.5069	25.5212	31.4578	29.1299
ENSG00000197479	0.611783	1.44413	6.63014	0.0100268	0.0319505	protocadherin beta 11 [Source:HGNC Symbol;Acc:HGNC:8682]	PCDHB11	2.52181	1.30371	2.63978	3.83575	2.28702	3.56919
ENSG00000105088	0.611689	0.847476	5.62896	0.0176661	0.0506258	olfactomedin 2 [Source:HGNC Symbol;Acc:HGNC:17189]	OLFM2	0.92121	2.49968	0.911577	1.52252	3.29945	1.51611
ENSG00000176396	0.611378	3.27549	9.67059	0.00187242	0.00810301	EP300 interacting inhibitor of differentiation 2 [Source:HGNC Symbol;Acc:HGNC:28292]	EID2	8.57877	6.46468	7.88135	10.6997	13.4871	10.8339
ENSG00000188626	0.611183	0.711571	5.54075	0.0185787	0.0526428	golgin A8 family member M [Source:HGNC Symbol;Acc:HGNC:44404]	GOLGA8M	1.43939	1.07745	1.28191	2.1534	1.4373	2.27417
ENSG00000140104	0.61108	1.6963	6.00455	0.0142691	0.0427086	chromosome 14 open reading frame 79 [Source:HGNC Symbol;Acc:HGNC:20126]	C14orf79	2.65999	2.81214	2.09853	2.95252	5.02601	3.7508
ENSG00000117481	0.610725	4.19946	8.0084	0.00465609	0.0170849	NOP2/Sun RNA methyltransferase family member 4 [Source:HGNC Symbol;Acc:HGNC:31802]	NSUN4	9.5921	18.3166	16.4939	23.7968	20.764	21.0993
ENSG00000124217	0.610387	2.96807	10.9966	0.000912772	0.00445772	molybdenum cofactor synthesis 3 [Source:HGNC Symbol;Acc:HGNC:15765]	MOCS3	5.84968	6.35694	6.2576	8.09208	10.4407	9.79157
ENSG00000183496	0.610274	1.69288	6.98288	0.00822929	0.0271682	mex-3 RNA binding family member B [Source:HGNC Symbol;Acc:HGNC:25297]	MEX3B	2.57939	1.99328	3.04809	3.5834	3.29945	4.72206
ENSG00000197024	0.610271	4.46013	14.8624	0.000115644	0.000786921	zinc finger protein 398 [Source:HGNC Symbol;Acc:HGNC:18373]	ZNF398	17.8945	16.388	17.9182	27.5821	27.1278	24.9922
ENSG00000171533	0.610227	3.31429	12.5429	0.000397705	0.00221446	microtubule associated protein 6 [Source:HGNC Symbol;Acc:HGNC:6868]	MAP6	7.95695	7.89769	7.68194	12.9625	11.6611	11.363
ENSG00000142156	0.610225	8.55396	17.8484	2.39223e-05	0.000206437	collagen type VI alpha 1 chain [Source:HGNC Symbol;Acc:HGNC:2211]	COL6A1	267.473	398.192	236.649	405.799	529.35	417.405
ENSG00000158805	0.610097	4.50153	13.8482	0.000198186	0.00124595	zinc finger protein 276 [Source:HGNC Symbol;Acc:HGNC:23330]	ZNF276	16.8697	17.1206	19.3046	25.5801	22.608	34.2468
ENSG00000134247	0.609743	8.34157	19.3775	1.07264e-05	0.000104113	prostaglandin F2 receptor inhibitor [Source:HGNC Symbol;Acc:HGNC:9601]	PTGFRN	229.163	283.692	255.688	350.82	463.695	363.109
ENSG00000169851	0.609686	8.04035	16.5052	4.85176e-05	0.000377241	protocadherin 7 [Source:HGNC Symbol;Acc:HGNC:8659]	PCDH7	211.855	190.525	222.206	294.966	357.29	302.56
ENSG00000171853	0.609396	5.56792	16.8313	4.08535e-05	0.000325548	trafficking protein particle complex 12 [Source:HGNC Symbol;Acc:HGNC:24284]	TRAPPC12	39.2666	34.7261	38.6186	58.8737	52.7008	60.2656
ENSG00000278224	0.609214	0.668234	4.2067	0.0402647	0.0967959	prickle planar cell polarity protein 4 [Source:HGNC Symbol;Acc:HGNC:16805]	PRICKLE4	1.78484	1.099	0.911577	1.70758	2.20566	1.69773
ENSG00000100345	0.609206	9.31361	19.4365	1.03998e-05	0.000101744	myosin heavy chain 9 [Source:HGNC Symbol;Acc:HGNC:7579]	MYH9	438.07	506.669	559.272	661.894	697.613	954.236
ENSG00000213398	0.608346	3.36297	12.1043	0.000503049	0.00270606	lecithin-cholesterol acyltransferase [Source:HGNC Symbol;Acc:HGNC:6522]	LCAT	8.67089	6.52933	8.97334	12.3737	9.15711	15.8481
ENSG00000169925	0.607572	5.25572	13.4844	0.00024055	0.00146349	bromodomain containing 3 [Source:HGNC Symbol;Acc:HGNC:1104]	BRD3	26.4272	32.0325	32.3515	49.8479	41.2386	47.1654
ENSG00000107872	0.607366	3.05337	11.0165	0.000903044	0.00442141	F-box and leucine rich repeat protein 15 [Source:HGNC Symbol;Acc:HGNC:28155]	FBXL15	6.88605	5.67815	7.1217	9.05943	9.7718	11.1261
ENSG00000064270	0.607114	-0.427248	2.91803	0.0875948	0.178439	ATPase secretory pathway Ca2+ transporting 2 [Source:HGNC Symbol;Acc:HGNC:29103]	ATP2C2	0.391514	0.657243	0.655196	1.02623	0.632772	0.939675
ENSG00000158321	0.606889	3.73945	13.5461	0.000232779	0.00142431	AUTS2, activator of transcription and developmental regulator [Source:HGNC Symbol;Acc:HGNC:14262]	AUTS2	8.6824	12.0997	10.9959	14.5271	18.3052	15.3665
ENSG00000140006	0.606567	2.78541	6.17906	0.0129271	0.0393311	WD repeat domain 89 [Source:HGNC Symbol;Acc:HGNC:20489]	WDR89	4.90544	5.04245	5.77332	4.60122	11.2362	9.64154
ENSG00000004660	0.60652	2.99862	9.80219	0.00174304	0.00765058	calcium/calmodulin dependent protein kinase kinase 1 [Source:HGNC Symbol;Acc:HGNC:1469]	CAMKK1	4.82484	8.55493	5.52644	6.34244	11.8961	10.6523
ENSG00000153902	0.606496	3.72805	12.6772	0.000370132	0.00208045	leucine rich repeat LGI family member 4 [Source:HGNC Symbol;Acc:HGNC:18712]	LGI4	13.1848	5.95828	12.2113	17.4712	9.01248	21.4862
ENSG00000177192	0.606301	2.85265	9.81886	0.00172731	0.00759192	pseudouridylate synthase 1 [Source:HGNC Symbol;Acc:HGNC:15508]	PUS1	5.90726	5.43033	5.70685	8.37808	7.53902	10.2101
ENSG00000198053	0.606007	5.11746	15.1839	9.75314e-05	0.000684	signal regulatory protein alpha [Source:HGNC Symbol;Acc:HGNC:9662]	SIRPA	20.7157	34.4891	27.4613	34.1432	53.2432	38.0766
ENSG00000196576	0.605958	6.83786	17.1778	3.404e-05	0.00027777	plexin B2 [Source:HGNC Symbol;Acc:HGNC:9104]	PLXNB2	83.9222	96.2807	91.68	131.728	129.501	153.08
ENSG00000181722	0.605936	6.97766	18.2501	1.93719e-05	0.000171891	zinc finger and BTB domain containing 20 [Source:HGNC Symbol;Acc:HGNC:13503]	ZBTB20	108.553	101.226	90.3506	159.041	153.456	143.415
ENSG00000130054	0.605911	5.65065	16.0736	6.09261e-05	0.000455808	family with sequence similarity 155 member B [Source:HGNC Symbol;Acc:HGNC:30701]	FAM155B	79.6732	25.083	16.247	114.408	42.1426	23.7525
ENSG00000184619	0.605845	3.60659	13.3049	0.000264712	0.00157931	KRAB-A domain containing 2 [Source:HGNC Symbol;Acc:HGNC:26989]	KRBA2	6.96665	9.37379	12.7146	10.725	15.5571	17.5696
ENSG00000099864	0.605833	4.35834	15.04	0.000105257	0.000728302	paralemmin [Source:HGNC Symbol;Acc:HGNC:8594]	PALM	11.1466	17.5732	19.9218	16.7898	26.2239	31.2304
ENSG00000184659	0.605767	-2.0531	1.69578	0.192841	0.322744	forkhead box D4-like 4 [Source:HGNC Symbol;Acc:HGNC:23762]	FOXD4L4	0.276363	0.107745	0.142434	0.328057	0.144634	0.315857
ENSG00000129932	0.605416	2.82927	8.69216	0.00319583	0.0125707	deoxyhypusine hydroxylase [Source:HGNC Symbol;Acc:HGNC:28662]	DOHH	5.67696	5.24717	5.79231	6.62003	9.84412	9.30199
ENSG00000166762	0.605393	2.13191	6.98142	0.00823603	0.0271848	cation channel sperm associated 2 [Source:HGNC Symbol;Acc:HGNC:18810]	CATSPER2	3.28181	2.4889	4.76679	5.2321	4.565	5.78808
ENSG00000178096	0.605229	2.29097	8.02206	0.00462109	0.0169809	bolA family member 1 [Source:HGNC Symbol;Acc:HGNC:24263]	BOLA1	4.3412	3.30776	3.96916	5.98915	5.53223	6.06446
ENSG00000006194	0.60514	3.54456	13.2049	0.000279215	0.0016438	zinc finger protein 263 [Source:HGNC Symbol;Acc:HGNC:13056]	ZNF263	7.88786	9.53541	10.1603	10.9941	15.5119	15.7534
ENSG00000214300	0.605118	1.12037	4.56707	0.0325922	0.0819408	speedy/RINGO cell cycle regulator family member E3 [Source:HGNC Symbol;Acc:HGNC:35462]	SPDYE3	1.19757	2.38116	1.63324	2.48146	2.33222	2.85851
ENSG00000181773	0.605031	-1.07206	2.60389	0.106602	0.207493	G protein-coupled receptor 3 [Source:HGNC Symbol;Acc:HGNC:4484]	GPR3	0.230303	0.366332	0.493771	0.521527	0.515257	0.576439
ENSG00000162650	0.605023	1.84014	6.25701	0.0123703	0.037983	ataxin 7 like 2 [Source:HGNC Symbol;Acc:HGNC:28713]	ATXN7L2	2.5103	2.97375	2.91515	4.28157	3.42601	5.20375
ENSG00000180304	0.604963	4.97913	6.55169	0.0104785	0.033205	ornithine decarboxylase antizyme 2 [Source:HGNC Symbol;Acc:HGNC:8096]	OAZ2	19.3454	19.7065	38.2957	40.3931	39.3132	32.0121
ENSG00000107140	0.604764	3.95513	13.8428	0.000198756	0.00124905	testis-specific kinase 1 [Source:HGNC Symbol;Acc:HGNC:11731]	TESK1	12.4133	12.2829	12.1259	19.6077	19.1549	17.3169
ENSG00000146859	0.604399	5.43662	15.9906	6.36577e-05	0.000474693	transmembrane protein 140 [Source:HGNC Symbol;Acc:HGNC:21870]	TMEM140	37.4126	29.1665	36.7859	53.8183	49.0669	53.443
ENSG00000178233	0.604275	0.191249	4.41128	0.0357021	0.0882153	transmembrane protein 151B [Source:HGNC Symbol;Acc:HGNC:21315]	TMEM151B	0.564241	0.905055	1.13947	0.706585	1.75368	1.61877
ENSG00000158042	0.604269	4.43619	13.7376	0.000210204	0.00130766	mitochondrial ribosomal protein L17 [Source:HGNC Symbol;Acc:HGNC:14053]	MRPL17	18.9309	15.7846	16.8167	24.5959	25.9888	27.6138
ENSG00000182667	0.604069	2.55554	8.3561	0.00384395	0.01467	neurotrimin [Source:HGNC Symbol;Acc:HGNC:17941]	NTM	1.95757	7.78994	4.03563	2.54875	11.5164	7.27261
ENSG00000232434	0.60394	3.78695	13.217	0.000277419	0.00163623	chromosome 9 open reading frame 172 [Source:HGNC Symbol;Acc:HGNC:37284]	C9orf172	10.6285	8.6519	13.4363	14.6364	13.7673	21.5178
ENSG00000128268	0.603889	4.46049	14.4834	0.000141404	0.000932903	mannosyl (beta-1,4-)-glycoprotein beta-1,4-N-acetylglucosaminyltransferase [Source:HGNC Symbol;Acc:HGNC:7046]	MGAT3	14.3018	22.7665	15.0315	19.6077	35.7606	24.4789
ENSG00000255690	0.603656	4.10488	13.6464	0.000220668	0.00136323	TLR4 interactor with leucine rich repeats [Source:HGNC Symbol;Acc:HGNC:22200]	TRIL	5.87271	23.6607	10.5781	8.01638	38.2375	16.7325
ENSG00000143740	0.603637	6.50227	18.5703	1.63751e-05	0.000149692	synaptosome associated protein 47 [Source:HGNC Symbol;Acc:HGNC:30669]	SNAP47	80.0877	59.4751	76.6105	117.932	93.4423	116.196
ENSG00000140743	0.603462	3.30226	12.2598	0.000462816	0.00251752	cerebellar degeneration related protein 2 [Source:HGNC Symbol;Acc:HGNC:1799]	CDR2	6.22968	8.43641	8.69797	9.10149	13.7311	12.8238
ENSG00000182606	0.603438	8.35273	18.4764	1.72023e-05	0.000155832	trafficking kinesin protein 1 [Source:HGNC Symbol;Acc:HGNC:29947]	TRAK1	278.597	234.916	265.715	413.066	397.245	371.732
ENSG00000106633	0.603371	-0.389326	3.17142	0.0749372	0.157718	glucokinase [Source:HGNC Symbol;Acc:HGNC:4195]	GCK	0.702423	0.560272	0.465284	0.765467	1.33786	0.623818
ENSG00000154146	0.603328	-0.274428	3.72	0.0537642	0.121678	neurogranin [Source:HGNC Symbol;Acc:HGNC:8000]	NRGN	0.437575	0.387881	1.13947	0.748644	0.687009	1.38188
ENSG00000142173	0.603201	8.61004	15.3543	8.91188e-05	0.000631916	collagen type VI alpha 2 chain [Source:HGNC Symbol;Acc:HGNC:2212]	COL6A2	285.794	401.909	251.776	412.208	510.8	481.753
ENSG00000257017	0.603199	6.51658	4.46738	0.0345479	0.0858596	haptoglobin [Source:HGNC Symbol;Acc:HGNC:5141]	HP	104.949	40.2642	79.3737	90.5859	136.344	97.6788
ENSG00000006210	0.603082	4.70991	2.89406	0.0889069	0.18046	C-X3-C motif chemokine ligand 1 [Source:HGNC Symbol;Acc:HGNC:10647]	CX3CL1	18.8042	27.9813	13.6547	29.7439	16.8408	49.8186
ENSG00000090776	0.603051	4.90498	14.5161	0.000138967	0.000919263	ephrin B1 [Source:HGNC Symbol;Acc:HGNC:3226]	EFNB1	25.2412	23.7577	22.2862	33.874	39.0239	35.4234
ENSG00000126785	0.602899	3.75727	13.0207	0.000308072	0.00178786	ras homolog family member J [Source:HGNC Symbol;Acc:HGNC:688]	RHOJ	8.4521	9.53541	14.2149	14.2495	13.3063	21.1861
ENSG00000122735	0.602848	-2.8039	0.988226	0.320176	0.467928	dynein axonemal intermediate chain 1 [Source:HGNC Symbol;Acc:HGNC:2954]	DNAI1	0.149697	0.0430979	0.104452	0.142999	0.198871	0.102654
ENSG00000150967	0.602739	2.8288	10.2906	0.0013371	0.00610805	ATP binding cassette subfamily B member 9 [Source:HGNC Symbol;Acc:HGNC:50]	ABCB9	5.20484	4.61147	6.96977	7.90703	6.6893	11.0629
ENSG00000131831	0.602504	3.87681	11.9847	0.000536385	0.00285283	retinoic acid induced 2 [Source:HGNC Symbol;Acc:HGNC:9835]	RAI2	13.2309	11.3024	10.1983	18.245	21.243	13.7793
ENSG00000103528	0.602368	0.656194	2.99096	0.0837303	0.172177	synaptotagmin 17 [Source:HGNC Symbol;Acc:HGNC:24119]	SYT17	0.42606	1.73469	1.82315	1.44682	1.62713	2.22679
ENSG00000100038	0.602368	2.93695	10.618	0.00111993	0.00527384	topoisomerase (DNA) III beta [Source:HGNC Symbol;Acc:HGNC:11993]	TOP3B	6.97817	5.12865	6.01071	11.2717	7.52094	8.87559
ENSG00000101115	0.601535	-1.34951	2.25943	0.132803	0.244871	spalt like transcription factor 4 [Source:HGNC Symbol;Acc:HGNC:15924]	SALL4	0.184242	0.527949	0.199408	0.252352	0.614692	0.450096
ENSG00000182810	0.601391	3.50893	11.5822	0.000665868	0.0034249	DEAD-box helicase 28 [Source:HGNC Symbol;Acc:HGNC:17330]	DDX28	10.3291	7.05728	9.85643	12.9541	12.9085	15.0348
ENSG00000187372	0.601342	3.01512	10.8219	0.00100307	0.00482274	protocadherin beta 13 [Source:HGNC Symbol;Acc:HGNC:8684]	PCDHB13	4.58302	8.07008	6.71339	7.76403	11.2633	9.9495
ENSG00000132749	0.601235	-1.87458	1.84596	0.174254	0.299906	testis expressed metallothionein like protein [Source:HGNC Symbol;Acc:HGNC:7446]	TESMIN	0.0806059	0.280136	0.246886	0.168235	0.325425	0.394821
ENSG00000163485	0.601179	3.18429	6.17695	0.0129426	0.0393631	adenosine A1 receptor [Source:HGNC Symbol;Acc:HGNC:262]	ADORA1	7.53089	5.82899	7.71043	14.8383	11.7876	6.68828
ENSG00000166831	0.601088	4.45869	6.9222	0.00851322	0.0279215	RNA binding protein with multiple splicing 2 [Source:HGNC Symbol;Acc:HGNC:19098]	RBPMS2	14.2903	19.6957	17.4149	37.2219	20.1583	22.9786
ENSG00000213859	0.600574	3.13528	10.6444	0.00110402	0.00521578	potassium channel tetramerization domain containing 11 [Source:HGNC Symbol;Acc:HGNC:21302]	KCTD11	6.54059	7.42361	6.71339	8.3865	13.4328	10.0679
ENSG00000157927	0.600568	2.35523	8.46176	0.00362691	0.0139681	Rap associating with DIL domain [Source:HGNC Symbol;Acc:HGNC:22226]	RADIL	4.19151	3.20002	4.71931	6.55274	4.70059	7.16206
ENSG00000188710	0.600332	0.0793515	4.19612	0.0405166	0.0971641	pyroglutamylated RFamide peptide [Source:HGNC Symbol;Acc:HGNC:29982]	QRFP	0.552726	0.721889	1.21544	1.11035	0.994355	1.57139
ENSG00000180340	0.600175	1.38821	6.32633	0.0118958	0.0367719	frizzled class receptor 2 [Source:HGNC Symbol;Acc:HGNC:4040]	FZD2	1.39333	2.5751	2.13651	1.90946	4.32093	3.21385
ENSG00000160789	0.600132	7.16025	18.5633	1.64353e-05	0.000150071	lamin A/C [Source:HGNC Symbol;Acc:HGNC:6636]	LMNA	110.223	105.945	124.677	159.15	165.316	192.744
ENSG00000225362	0.600088	-0.831322	2.98063	0.0842664	0.172903	cancer/testis antigen 62 [Source:HGNC Symbol;Acc:HGNC:27286]	CT62	0.644847	0.204715	0.465284	0.790703	0.388703	0.734368
ENSG00000140829	0.599469	6.1436	17.1812	3.39781e-05	0.000277523	DEAH-box helicase 38 [Source:HGNC Symbol;Acc:HGNC:17211]	DHX38	59.6714	58.0205	50.9629	82.0396	92.2762	81.0647
ENSG00000072110	0.599379	6.95942	17.5632	2.77918e-05	0.000234526	actinin alpha 1 [Source:HGNC Symbol;Acc:HGNC:163]	ACTN1	79.8229	127.537	90.1037	129.709	189.723	129.651
ENSG00000221916	0.599276	-0.719886	3.13288	0.0767281	0.160791	chromosome 19 open reading frame 73 [Source:HGNC Symbol;Acc:HGNC:25534]	C19orf73	0.552726	0.377106	0.465284	0.622468	0.66893	0.813332
ENSG00000180357	0.599252	6.16223	17.7433	2.52803e-05	0.000216756	zinc finger protein 609 [Source:HGNC Symbol;Acc:HGNC:29003]	ZNF609	54.0981	62.6428	54.2673	84.7734	89.2389	84.5234
ENSG00000050555	0.599138	-0.277751	2.93648	0.0865993	0.176784	laminin subunit gamma 3 [Source:HGNC Symbol;Acc:HGNC:6494]	LAMC3	0.529696	0.764987	0.588727	1.27858	0.67797	0.955468
ENSG00000072832	0.599055	1.96516	5.83722	0.0156906	0.0460517	collapsin response mediator protein 1 [Source:HGNC Symbol;Acc:HGNC:2365]	CRMP1	2.77515	3.80339	2.68725	4.04604	4.34805	5.60646
ENSG00000125898	0.598685	0.435896	3.36038	0.0667827	0.144056	family with sequence similarity 110 member A [Source:HGNC Symbol;Acc:HGNC:16188]	FAM110A	0.92121	0.797311	1.22493	0.782291	1.32882	2.8743
ENSG00000010030	0.598507	-1.04815	1.94023	0.163644	0.286287	ETS variant 7 [Source:HGNC Symbol;Acc:HGNC:18160]	ETV7	0.092121	0.301685	0.721665	0.126176	0.813564	0.686989
ENSG00000197122	0.598268	2.89111	8.81234	0.00299201	0.0119212	SRC proto-oncogene, non-receptor tyrosine kinase [Source:HGNC Symbol;Acc:HGNC:11283]	SRC	3.79999	8.66267	5.62139	7.11632	10.4769	8.67818
ENSG00000277117	0.598217	1.92352	6.45223	0.0110813	0.0347851			1.7503	1.9825	4.90922	2.76746	2.42261	8.70187
ENSG00000152784	0.597997	1.3617	5.01628	0.0251101	0.0664886	PR/SET domain 8 [Source:HGNC Symbol;Acc:HGNC:13993]	PRDM8	1.62363	2.05792	2.3739	3.6591	2.49493	3.04013
ENSG00000116819	0.597954	-0.475515	3.30971	0.0688714	0.147391	transcription factor AP-2 epsilon [Source:HGNC Symbol;Acc:HGNC:30774]	TFAP2E	0.333939	0.538724	0.740657	0.555174	0.596613	1.37398
ENSG00000133065	0.597943	8.25483	19.1878	1.18468e-05	0.000112936	solute carrier family 41 member 1 [Source:HGNC Symbol;Acc:HGNC:19429]	SLC41A1	266.08	218.28	244.284	412.2	329.132	362.612
ENSG00000198934	0.597665	2.42929	7.79072	0.00525151	0.0187847	MAGE family member E1 [Source:HGNC Symbol;Acc:HGNC:24934]	MAGEE1	4.45635	3.56635	4.72881	5.40033	6.09269	7.90433
ENSG00000174885	0.597625	-0.397683	2.94866	0.0859486	0.175731	NLR family pyrin domain containing 6 [Source:HGNC Symbol;Acc:HGNC:22944]	NLRP6	0.506666	0.668017	0.512762	0.43741	1.20227	1.08181
ENSG00000188522	0.597603	2.91323	9.58322	0.00196364	0.00844988	family with sequence similarity 83 member G [Source:HGNC Symbol;Acc:HGNC:32554]	FAM83G	4.17999	6.57243	6.98876	5.87139	11.9594	9.45992
ENSG00000186868	0.597479	5.43085	12.1126	0.000500834	0.00269596	microtubule associated protein tau [Source:HGNC Symbol;Acc:HGNC:6893]	MAPT	29.8357	44.24	29.8826	55.1978	50.7483	48.7605
ENSG00000275111	0.597177	2.5314	8.07666	0.00448391	0.0165886	zinc finger protein 2 [Source:HGNC Symbol;Acc:HGNC:12991]	ZNF2	4.28363	4.85929	4.49142	5.41715	7.20456	8.26756
ENSG00000103647	0.596956	2.93387	9.58684	0.00195977	0.00843548	coronin 2B [Source:HGNC Symbol;Acc:HGNC:2256]	CORO2B	5.81514	6.74482	5.6024	10.4894	8.74129	8.29915
ENSG00000102178	0.596513	5.67502	14.8094	0.000118944	0.000806977	ubiquitin like 4A [Source:HGNC Symbol;Acc:HGNC:12505]	UBL4A	45.5193	36.4931	40.2328	59.2102	62.3099	62.6266
ENSG00000157613	0.596464	3.17771	8.3134	0.00393536	0.0149543	cAMP responsive element binding protein 3 like 1 [Source:HGNC Symbol;Acc:HGNC:18856]	CREB3L1	7.70362	6.84179	6.31457	16.63	7.93676	8.70187
ENSG00000172425	0.596303	-0.272027	3.82439	0.0505119	0.115653	tetratricopeptide repeat domain 36 [Source:HGNC Symbol;Acc:HGNC:33708]	TTC36	0.725453	0.430979	0.740657	0.975761	0.614692	1.3187
ENSG00000161847	0.595979	3.56122	11.2228	0.000807963	0.00402976	ribonucleoprotein, PTB binding 1 [Source:HGNC Symbol;Acc:HGNC:30296]	RAVER1	7.80726	9.38456	10.9484	14.6112	11.7786	16.1166
ENSG00000159842	0.595967	7.18981	18.1485	2.04329e-05	0.000179615	active BCR-related [Source:HGNC Symbol;Acc:HGNC:81]	ABR	113.862	111.451	123.186	182.139	160.299	184.887
ENSG00000171385	0.59596	5.72121	15.8164	6.9795e-05	0.000513528	potassium voltage-gated channel subfamily D member 3 [Source:HGNC Symbol;Acc:HGNC:6239]	KCND3	54.8811	37.118	34.0797	81.1984	59.363	49.7396
ENSG00000171621	0.595831	3.6584	13.6256	0.000223123	0.00137468	splA/ryanodine receptor domain and SOCS box containing 1 [Source:HGNC Symbol;Acc:HGNC:30628]	SPSB1	9.62665	11.7657	8.67898	13.9298	18.3052	13.3055
ENSG00000276547	0.595749	5.03156	14.9188	0.000112238	0.000767653	protocadherin gamma subfamily B, 5 [Source:HGNC Symbol;Acc:HGNC:8712]	PCDHGB5	25.6096	24.318	28.2114	38.6014	38.12	41.2194
ENSG00000171773	0.59524	-0.954771	2.60796	0.106328	0.207112	nucleoredoxin-like 1 [Source:HGNC Symbol;Acc:HGNC:25179]	NXNL1	0.552726	0.474077	0.180416	0.87482	0.515257	0.379029
ENSG00000157833	0.595106	1.2405	4.81165	0.028268	0.0730992	GRB2 associated regulator of MAPK1 subtype 2 [Source:HGNC Symbol;Acc:HGNC:27172]	GAREM2	1.14	2.69362	1.91811	2.45623	2.93787	2.8743
ENSG00000233087	0.595101	-1.06072	2.40381	0.12104	0.228762	RAB6C-like [Source:EntrezGene;Acc:150786]		0.310908	0.441753	0.332346	0.63088	0.415821	0.600129
ENSG00000126218	0.594953	2.71324	9.40916	0.00215904	0.00911691	coagulation factor X [Source:HGNC Symbol;Acc:HGNC:3528]	F10	6.81695	4.76232	4.13059	9.6062	7.1684	6.71986
ENSG00000147113	0.594785	5.0344	14.7617	0.000121986	0.000823085	chromosome X open reading frame 36 [Source:HGNC Symbol;Acc:HGNC:25866]	CXorf36	24.5042	22.217	31.2215	36.7593	32.0092	49.7396
ENSG00000134571	0.594557	12.2339	22.8217	1.7775e-06	2.18105e-05	myosin binding protein C, cardiac [Source:HGNC Symbol;Acc:HGNC:7551]	MYBPC3	4656.46	2984.73	3870.82	6900.66	4433.24	6054.69
ENSG00000125618	0.594481	1.48936	5.22584	0.0222537	0.0604278	paired box 8 [Source:HGNC Symbol;Acc:HGNC:8622]	PAX8	0.92121	3.46938	2.44037	1.94311	5.15257	2.77165
ENSG00000088320	0.594336	1.31504	6.10312	0.0134943	0.0407781	RRAD and GEM like GTPase 1 [Source:HGNC Symbol;Acc:HGNC:15922]	REM1	1.52	1.50843	2.88666	2.41417	2.31414	4.09825
ENSG00000147883	0.594045	2.44034	8.57346	0.00341098	0.0132995	cyclin dependent kinase inhibitor 2B [Source:HGNC Symbol;Acc:HGNC:1788]	CDKN2B	3.41999	6.51855	3.0196	5.05545	9.69045	4.72996
ENSG00000182870	0.593994	2.19323	6.86127	0.00880838	0.0287274	polypeptide N-acetylgalactosaminyltransferase 9 [Source:HGNC Symbol;Acc:HGNC:4131]	GALNT9	1.34727	7.00341	2.18399	2.2207	11.8871	2.67689
ENSG00000100031	0.593988	0.169991	4.44548	0.0349937	0.0867802	gamma-glutamyltransferase 1 [Source:HGNC Symbol;Acc:HGNC:4250]	GGT1	0.690908	0.91583	1.00653	1.11035	1.14803	1.71353
ENSG00000205189	0.593755	6.16702	9.65336	0.00189006	0.00817273	zinc finger and BTB domain containing 10 [Source:HGNC Symbol;Acc:HGNC:30953]	ZBTB10	72.0386	46.1147	54.2389	78.2459	104.109	76.24
ENSG00000251201	0.593164	1.7294	1.35233	0.244871	0.385573	TMED7-TICAM2 readthrough [Source:HGNC Symbol;Acc:HGNC:33945]	TMED7-TICAM2	4.65211	4.30979	0.446293	2.51511	5.02601	2.8822
ENSG00000253846	0.59307	5.17399	14.6733	0.000127842	0.0008579	protocadherin gamma subfamily A, 10 [Source:HGNC Symbol;Acc:HGNC:8697]	PCDHGA10	31.0217	23.8978	31.7153	44.17	40.5426	45.0965
ENSG00000175662	0.592982	8.22257	18.5466	1.65797e-05	0.000151218	target of myb1 like 2 membrane trafficking protein [Source:HGNC Symbol;Acc:HGNC:11984]	TOM1L2	246.919	220.532	245.803	398.64	319.405	360.756
ENSG00000101489	0.592809	-1.13222	2.38316	0.122649	0.230877	CUGBP Elav-like family member 4 [Source:HGNC Symbol;Acc:HGNC:14015]	CELF4	0.207272	0.549498	0.313355	0.479469	0.596613	0.457993
ENSG00000070413	0.592654	5.96223	15.7521	7.22091e-05	0.000529589	DiGeorge syndrome critical region gene 2 [Source:HGNC Symbol;Acc:HGNC:2845]	DGCR2	51.3114	46.6427	51.1148	69.9688	76.4659	78.4115
ENSG00000106236	0.59239	2.50951	7.75023	0.00537058	0.0191526	neuronal pentraxin 2 [Source:HGNC Symbol;Acc:HGNC:7953]	NPTX2	10.1563	0.991251	2.3644	15.2168	1.31978	3.9877
ENSG00000260691	0.592237	1.38968	6.13928	0.0132211	0.0400542	ankyrin repeat domain 20 family member A1 [Source:HGNC Symbol;Acc:HGNC:23665]	ANKRD20A1	3.2703	1.76701	1.25342	4.6601	2.49493	2.14783
ENSG00000173013	0.591782	-0.664048	3.40769	0.0648934	0.140804	coiled-coil domain containing 96 [Source:HGNC Symbol;Acc:HGNC:26900]	CCDC96	0.49515	0.441753	0.512762	0.790703	0.641811	0.758057
ENSG00000196782	0.591573	4.13224	13.4525	0.000244684	0.001483	mastermind like transcriptional coactivator 3 [Source:HGNC Symbol;Acc:HGNC:16272]	MAML3	13.4266	14.8041	13.6167	18.6825	22.6532	21.8731
ENSG00000151135	0.591527	4.26056	11.2866	0.000780702	0.00391411	transmembrane protein 263 [Source:HGNC Symbol;Acc:HGNC:28281]	TMEM263	19.6909	17.4439	9.39115	23.1491	28.3843	16.8194
ENSG00000226650	0.59135	-1.70812	2.05626	0.151582	0.27008	kinesin family member 4B [Source:HGNC Symbol;Acc:HGNC:6322]	KIF4B	0.299393	0.215489	0.161425	0.462645	0.370623	0.205307
ENSG00000178809	0.591268	1.05159	4.40361	0.035863	0.0884977	tripartite motif containing 73 [Source:HGNC Symbol;Acc:HGNC:18162]	TRIM73	2.01515	0.797311	2.27894	2.2964	1.90735	2.97695
ENSG00000158158	0.591254	5.19404	15.2615	9.3605e-05	0.00065935	cyclin and CBS domain divalent metal cation transport mediator 4 [Source:HGNC Symbol;Acc:HGNC:105]	CNNM4	29.6514	25.9449	32.0381	42.9503	40.877	48.0103
ENSG00000099889	0.591159	5.31295	14.6155	0.000131829	0.000880231	armadillo repeat gene deleted in velocardiofacial syndrome [Source:HGNC Symbol;Acc:HGNC:728]	ARVCF	37.0326	25.654	32.7693	51.5471	41.1392	50.2055
ENSG00000197114	0.591142	3.46946	10.8681	0.000978365	0.00472096	zinc finger CCCH-type and G-patch domain containing [Source:HGNC Symbol;Acc:HGNC:15948]	ZGPAT	9.16604	7.15425	10.1888	11.3811	13.3605	15.0427
ENSG00000186951	0.591003	5.66532	15.6381	7.66948e-05	0.000556124	peroxisome proliferator activated receptor alpha [Source:HGNC Symbol;Acc:HGNC:9232]	PPARA	43.389	44.7356	32.6838	65.6199	72.1179	45.8072
ENSG00000163431	0.590829	4.82548	14.9198	0.000112179	0.000767579	leiomodin 1 [Source:HGNC Symbol;Acc:HGNC:6647]	LMOD1	22.6848	23.3483	21.6879	30.7953	37.2431	34.2073
ENSG00000143630	0.590729	0.333175	3.61112	0.0573946	0.127903	hyperpolarization activated cyclic nucleotide gated potassium channel 3 [Source:HGNC Symbol;Acc:HGNC:19183]	HCN3	0.829089	1.08822	0.987542	1.57299	0.994355	1.91883
ENSG00000277858	0.59053	-2.6157	1.26644	0.260437	0.402808	H2A histone family member B2 [Source:HGNC Symbol;Acc:HGNC:18298]	H2AFB2	0.138182	0.0861958	0.113947	0.201882	0.198871	0.118446
ENSG00000249715	0.590388	-0.446151	3.34331	0.0674788	0.145225	fer-1 like family member 5 [Source:HGNC Symbol;Acc:HGNC:19044]	FER1L5	0.391514	1.02357	0.360833	0.698174	1.18419	0.623818
ENSG00000138741	0.59037	-0.898218	2.35589	0.124811	0.234087	transient receptor potential cation channel subfamily C member 3 [Source:HGNC Symbol;Acc:HGNC:12335]	TRPC3	0.483635	0.323234	0.408311	0.412175	0.65989	0.789643
ENSG00000154319	0.590361	0.206302	4.28195	0.0385191	0.0935538	family with sequence similarity 167 member A [Source:HGNC Symbol;Acc:HGNC:15549]	FAM167A	0.403029	1.88553	0.493771	0.698174	2.6034	0.726472
ENSG00000255346	0.59035	-1.49459	1.50789	0.219461	0.355994	NADPH oxidase 5 [Source:HGNC Symbol;Acc:HGNC:14874]	NOX5	0.368484	0.237038	0.170921	0.336469	0.244069	0.631714
ENSG00000169375	0.590322	5.4268	14.3402	0.00015257	0.00099428	SIN3 transcription regulator family member A [Source:HGNC Symbol;Acc:HGNC:19353]	SIN3A	29.6284	36.0729	37.4981	52.321	48.8048	53.601
ENSG00000185736	0.590276	-0.642809	3.03882	0.0812949	0.168271	adenosine deaminase, RNA specific B2 (inactive) [Source:HGNC Symbol;Acc:HGNC:227]	ADARB2	0.702423	0.441753	0.275372	1.37111	0.551415	0.371132
ENSG00000168795	0.590245	4.18852	12.784	0.000349605	0.00197895	zinc finger and BTB domain containing 5 [Source:HGNC Symbol;Acc:HGNC:23836]	ZBTB5	11.9412	16.1186	15.6298	20.104	24.9945	20.4518
ENSG00000214140	0.590175	1.876	6.20028	0.012773	0.0389372	photoreceptor disc component [Source:HGNC Symbol;Acc:HGNC:32528]	PRCD	2.27999	2.04715	4.63385	3.81051	3.5616	5.50381
ENSG00000166106	0.589322	5.0829	14.7013	0.000125962	0.000845997	ADAM metallopeptidase with thrombospondin type 1 motif 15 [Source:HGNC Symbol;Acc:HGNC:16305]	ADAMTS15	24.8957	42.2682	14.4713	36.9275	62.0116	22.6628
ENSG00000121361	0.58896	6.12975	14.8643	0.000115527	0.000786457	potassium voltage-gated channel subfamily J member 8 [Source:HGNC Symbol;Acc:HGNC:6269]	KCNJ8	62.8841	42.8285	63.0603	79.8273	75.7428	95.6258
ENSG00000160953	0.588947	4.67239	14.3716	0.000150047	0.000980632	melanoma associated antigen (mutated) 1 [Source:HGNC Symbol;Acc:HGNC:29641]	MUM1	19.5757	20.6978	20.7384	29.7102	29.6318	32.478
ENSG00000127511	0.58874	5.35802	13.4882	0.000240063	0.00146163	SIN3 transcription regulator family member B [Source:HGNC Symbol;Acc:HGNC:19354]	SIN3B	33.3363	34.015	30.7088	51.7153	43.4714	52.6692
ENSG00000160097	0.588664	5.27458	14.8299	0.000117656	0.000798577	fibronectin type III domain containing 5 [Source:HGNC Symbol;Acc:HGNC:20240]	FNDC5	44.6441	22.691	26.2458	62.0281	36.2397	40.256
ENSG00000037280	0.588296	4.51377	12.992	0.000312833	0.00180974	fms related tyrosine kinase 4 [Source:HGNC Symbol;Acc:HGNC:3767]	FLT4	18.4703	16.4418	19.2856	28.5999	20.999	33.0939
ENSG00000063176	0.588261	2.97377	10.4145	0.00125032	0.00576256	sphingosine kinase 2 [Source:HGNC Symbol;Acc:HGNC:18859]	SPHK2	5.40059	6.10912	7.23565	7.78926	9.76276	10.6681
ENSG00000106077	0.587429	3.61871	12.4338	0.000421644	0.00232753	abhydrolase domain containing 11 [Source:HGNC Symbol;Acc:HGNC:16407]	ABHD11	11.1927	8.53338	9.74248	14.5691	13.7854	15.7218
ENSG00000100678	0.587324	-1.82627	1.9232	0.165504	0.288445	solute carrier family 8 member A3 [Source:HGNC Symbol;Acc:HGNC:11070]	SLC8A3	0.253333	0.215489	0.161425	0.311234	0.316386	0.307961
ENSG00000133392	0.587306	6.35147	15.2831	9.25424e-05	0.000653013	myosin heavy chain 11 [Source:HGNC Symbol;Acc:HGNC:7569]	MYH11	59.9938	70.9176	64.703	101.647	87.1146	105.386
ENSG00000198585	0.587103	5.23857	13.6654	0.000218446	0.00135054	nudix hydrolase 16 [Source:HGNC Symbol;Acc:HGNC:26442]	NUDT16	31.7357	32.485	26.2078	40.5109	51.824	43.612
ENSG00000065054	0.586797	6.50715	17.1962	3.37103e-05	0.000275757	SLC9A3 regulator 2 [Source:HGNC Symbol;Acc:HGNC:11076]	SLC9A3R2	85.9834	48.9807	83.0485	120.565	73.7631	133.236
ENSG00000138942	0.586768	4.54707	6.48777	0.0108619	0.0342238	ring finger protein 185 [Source:HGNC Symbol;Acc:HGNC:26783]	RNF185	25.6096	10.462	22.0678	28.2382	28.0137	25.7266
ENSG00000215045	0.586677	-0.834083	2.23279	0.135109	0.247805	Grid2 interacting protein [Source:HGNC Symbol;Acc:HGNC:18464]	GRID2IP	0.368484	0.452528	0.417806	0.698174	0.352544	0.915986
ENSG00000116039	0.586647	-1.52334	1.97886	0.15951	0.280618	ATPase H+ transporting V1 subunit B1 [Source:HGNC Symbol;Acc:HGNC:853]	ATP6V1B1	0.195757	0.31246	0.265877	0.479469	0.415821	0.284271
ENSG00000122691	0.586563	0.648302	4.95038	0.0260849	0.0685497	twist family bHLH transcription factor 1 [Source:HGNC Symbol;Acc:HGNC:12428]	TWIST1	0.621817	1.82089	1.27241	1.03464	2.80227	1.70563
ENSG00000204851	0.586556	2.29929	7.7346	0.00541727	0.0192744	paraneoplastic Ma antigen family like 2 [Source:HGNC Symbol;Acc:HGNC:29206]	PNMAL2	2.68302	4.80541	4.19705	3.84416	7.48478	6.35663
ENSG00000013016	0.586508	5.49106	15.276	9.289e-05	0.000654889	EH domain containing 3 [Source:HGNC Symbol;Acc:HGNC:3244]	EHD3	34.4763	36.5255	36.634	49.318	59.5709	53.1667
ENSG00000111664	0.586364	2.58513	7.70862	0.00549576	0.0194974	G protein subunit beta 3 [Source:HGNC Symbol;Acc:HGNC:4400]	GNB3	3.91514	5.31181	5.05166	6.33403	6.2554	8.96245
ENSG00000160703	0.586333	5.31638	13.4457	0.000245566	0.00148509	NLR family member X1 [Source:HGNC Symbol;Acc:HGNC:29890]	NLRX1	37.2629	28.9726	29.123	54.0201	50.6308	38.9215
ENSG00000235268	0.586315	-2.0149	1.75846	0.184817	0.312998	lysine demethylase 4E [Source:HGNC Symbol;Acc:HGNC:37098]	KDM4E	0.138182	0.19394	0.208903	0.235528	0.307346	0.268479
ENSG00000269113	0.586261	1.64325	5.04664	0.0246737	0.0655851	TraB domain containing 2B [Source:HGNC Symbol;Acc:HGNC:44200]	TRABD2B	1.25515	3.65255	2.82969	2.77587	4.10398	3.96401
ENSG00000152518	0.586201	6.15655	15.8905	6.71154e-05	0.000496778	ZFP36 ring finger protein like 2 [Source:HGNC Symbol;Acc:HGNC:1108]	ZFP36L2	44.3447	68.2455	59.1291	70.1454	89.1304	96.8497
ENSG00000129951	0.586053	-1.41415	1.74785	0.186148	0.314797	phospholipid phosphatase related 3 [Source:HGNC Symbol;Acc:HGNC:23497]	PLPPR3	0.0806059	0.323234	0.465284	0.269175	0.280227	0.671197
ENSG00000221890	0.585956	4.83525	10.5116	0.00118629	0.00551822	neuronal pentraxin receptor [Source:HGNC Symbol;Acc:HGNC:7954]	NPTXR	19.6448	19.3617	29.2369	40.7044	24.8046	37.3422
ENSG00000132361	0.585739	7.56609	17.6328	2.67927e-05	0.000227555	clustered mitochondria homolog [Source:HGNC Symbol;Acc:HGNC:29094]	CLUH	160.486	115.276	178.897	231.92	175.685	274.59
ENSG00000162391	0.585572	2.61769	8.30209	0.00395995	0.0150268	family with sequence similarity 151 member A [Source:HGNC Symbol;Acc:HGNC:25032]	FAM151A	4.32969	4.69767	5.64988	7.78926	6.49043	7.69902
ENSG00000129646	0.585556	2.37899	8.02333	0.00461786	0.0169767	glutamine rich 2 [Source:HGNC Symbol;Acc:HGNC:25326]	QRICH2	5.21635	3.39396	3.83622	7.42756	4.9989	6.1829
ENSG00000163900	0.585367	4.02514	9.57648	0.00197086	0.00846565	transmembrane protein 41A [Source:HGNC Symbol;Acc:HGNC:30544]	TMEM41A	11.4921	9.64315	18.7443	17.7403	19.0283	20.8624
ENSG00000136807	0.584856	5.12273	14.5612	0.000135681	0.000900697	cyclin dependent kinase 9 [Source:HGNC Symbol;Acc:HGNC:1780]	CDK9	29.2369	26.085	28.2209	41.8904	38.9787	44.4727
ENSG00000204947	0.58484	0.864986	5.37323	0.0204481	0.0565942	zinc finger protein 425 [Source:HGNC Symbol;Acc:HGNC:20690]	ZNF425	1.16303	1.34681	1.81366	1.87582	2.03391	2.52686
ENSG00000183734	0.584764	-2.53364	1.13257	0.287227	0.432702	achaete-scute family bHLH transcription factor 2 [Source:HGNC Symbol;Acc:HGNC:739]	ASCL2	0.0460605	0.107745	0.189912	0.0336469	0.244069	0.276375
ENSG00000228486	0.584695	1.32994	5.64251	0.0175301	0.0503685	long intergenic non-protein coding RNA 1125 [Source:HGNC Symbol;Acc:HGNC:49272]	LINC01125	2.22242	1.59462	2.17449	2.75905	2.80227	3.37178
ENSG00000165548	0.584597	0.17049	2.01813	0.155431	0.275194	transmembrane protein 63C [Source:HGNC Symbol;Acc:HGNC:23787]	TMEM63C	0.679392	0.366332	1.19645	2.09452	0.189831	2.01359
ENSG00000186009	0.584587	-3.96748	0.585966	0.443983	0.589611	ATPase H+/K+ transporting beta subunit [Source:HGNC Symbol;Acc:HGNC:820]	ATP4B	0.0230303	0.0538724	0.0284868	0.0420587	0.090396	0.0315857
ENSG00000204149	0.584566	3.24449	11.0668	0.000878853	0.00433076	ArfGAP with GTPase domain, ankyrin repeat and PH domain 6 [Source:HGNC Symbol;Acc:HGNC:23466]	AGAP6	7.95695	5.71047	8.87838	11.7175	8.0814	14.3399
ENSG00000118046	0.584446	5.72975	14.2109	0.000163419	0.00105427	serine/threonine kinase 11 [Source:HGNC Symbol;Acc:HGNC:11389]	STK11	47.2005	35.3941	45.2845	63.5759	61.2071	65.5798
ENSG00000171456	0.584363	6.07112	15.4664	8.39864e-05	0.000601377	additional sex combs like 1, transcriptional regulator [Source:HGNC Symbol;Acc:HGNC:18318]	ASXL1	48.5132	55.4023	57.6193	81.2405	77.1077	83.3547
ENSG00000277745	0.584058	-2.29751	1.51071	0.21903	0.355547	H2A histone family member B3 [Source:HGNC Symbol;Acc:HGNC:14455]	H2AFB3	0.172727	0.129294	0.132938	0.260764	0.244069	0.157929
ENSG00000120322	0.584054	1.56903	5.79989	0.0160271	0.0468891	protocadherin beta 8 [Source:HGNC Symbol;Acc:HGNC:8693]	PCDHB8	0.92121	3.51248	2.62078	1.52252	5.80342	3.26912
ENSG00000078699	0.583949	4.06788	12.9363	0.00032227	0.00185381	CBFA2/RUNX1 translocation partner 2 [Source:HGNC Symbol;Acc:HGNC:1536]	CBFA2T2	11.6533	14.1684	14.4713	19.4816	19.7425	20.9413
ENSG00000095383	0.583843	2.1637	6.727	0.00949639	0.0305582	TBC1 domain family member 2 [Source:HGNC Symbol;Acc:HGNC:18026]	TBC1D2	2.80969	4.33134	3.47539	3.68434	5.98421	6.43559
ENSG00000083838	0.583579	3.05556	8.37579	0.00380252	0.01455	zinc finger protein 446 [Source:HGNC Symbol;Acc:HGNC:21036]	ZNF446	6.50605	5.1071	8.51755	9.48002	10.269	9.83895
ENSG00000169057	0.583475	6.28322	14.4556	0.000143501	0.000944008	methyl-CpG binding protein 2 [Source:HGNC Symbol;Acc:HGNC:6990]	MECP2	56.1938	68.7519	62.0347	102.951	84.6739	92.5225
ENSG00000107882	0.583313	3.2693	10.6818	0.00108197	0.00513187	SUFU negative regulator of hedgehog signaling [Source:HGNC Symbol;Acc:HGNC:16466]	SUFU	6.36786	7.85459	8.93536	11.0362	10.5492	12.9344
ENSG00000204390	0.583307	1.42732	5.99942	0.0143106	0.0428088	heat shock protein family A (Hsp70) member 1 like [Source:HGNC Symbol;Acc:HGNC:5234]	HSPA1L	2.7406	1.61617	2.08903	3.53293	2.58532	3.41915
ENSG00000205683	0.583302	5.0936	14.108	0.000172612	0.00110733	double PHD fingers 3 [Source:HGNC Symbol;Acc:HGNC:17427]	DPF3	25.3102	20.4607	36.7859	36.7088	33.9346	51.4847
ENSG00000139908	0.5831	0.977983	5.28143	0.0215541	0.0589226	testis specific serine kinase 4 [Source:HGNC Symbol;Acc:HGNC:19825]	TSSK4	1.16303	1.6054	1.9371	2.11134	2.26894	2.56634
ENSG00000205978	0.583041	4.91827	13.9342	0.000189319	0.00119867	NYN domain and retroviral integrase containing [Source:HGNC Symbol;Acc:HGNC:20165]	NYNRIN	17.906	30.4702	24.755	29.2728	40.9403	37.9187
ENSG00000167183	0.582909	0.762936	4.71313	0.029933	0.0764669	proline rich 15 like [Source:HGNC Symbol;Acc:HGNC:28149]	PRR15L	0.633332	3.16769	0.427302	1.05988	4.11302	0.686989
ENSG00000159387	0.582358	4.24822	12.7813	0.000350095	0.00197963	iroquois homeobox 6 [Source:HGNC Symbol;Acc:HGNC:14675]	IRX6	9.99513	19.5126	15.4493	13.9382	33.0578	21.9126
ENSG00000156860	0.582287	4.31444	12.5528	0.00039561	0.00220509	fibrosin [Source:HGNC Symbol;Acc:HGNC:20442]	FBRS	14.6703	14.1684	19.1431	24.0239	22.9063	24.2973
ENSG00000204576	0.582265	2.54964	8.45318	0.00364406	0.0140308	proline rich 3 [Source:HGNC Symbol;Acc:HGNC:21149]	PRR3	3.89211	4.96703	5.1751	6.26674	7.04184	7.62005
ENSG00000181220	0.582061	4.29178	13.6432	0.00022104	0.00136447	zinc finger protein 746 [Source:HGNC Symbol;Acc:HGNC:21948]	ZNF746	15.58	16.0216	15.3924	23.6538	24.0815	22.6312
ENSG00000197245	0.581966	2.89058	8.19985	0.00418939	0.015752	family with sequence similarity 110 member D [Source:HGNC Symbol;Acc:HGNC:25860]	FAM110D	7.51938	4.04043	6.39054	8.63885	7.10512	10.6365
ENSG00000258461	0.581804	2.83573	6.33057	0.0118674	0.0367106			3.60423	7.15425	6.73238	8.49585	8.45202	8.22808
ENSG00000122783	0.581684	3.97802	11.8718	0.000569895	0.00300117	chromosome 7 open reading frame 49 [Source:HGNC Symbol;Acc:HGNC:22432]	C7orf49	15.3842	11.658	11.0054	19.5489	18.4046	18.3987
ENSG00000102984	0.581604	2.22697	7.16816	0.0074209	0.0249256	zinc finger protein 821 [Source:HGNC Symbol;Acc:HGNC:28043]	ZNF821	3.36242	5.05323	2.79171	4.50869	7.59326	4.6431
ENSG00000105371	0.58155	-0.900864	2.66356	0.102671	0.201691	intercellular adhesion molecule 4 (Landsteiner-Wiener blood group) [Source:HGNC Symbol;Acc:HGNC:5347]	ICAM4	0.207272	0.269362	0.731161	0.269175	0.45198	1.1055
ENSG00000204256	0.581484	6.31464	14.9285	0.000111661	0.000764362	bromodomain containing 2 [Source:HGNC Symbol;Acc:HGNC:1103]	BRD2	58.5429	57.3848	76.1357	101.967	90.4321	92.9489
ENSG00000198597	0.581316	3.81715	9.70446	0.00183822	0.00798521	zinc finger protein 536 [Source:HGNC Symbol;Acc:HGNC:29025]	ZNF536	12.8624	12.7031	8.30865	21.3826	14.0927	15.0743
ENSG00000121743	0.581279	5.00006	12.7217	0.000361435	0.00203657	gap junction protein alpha 3 [Source:HGNC Symbol;Acc:HGNC:4277]	GJA3	26.1393	20.9887	30.0061	34.4544	37.207	43.0434
ENSG00000124104	0.581208	4.68335	14.0277	0.000180139	0.0011478	sorting nexin family member 21 [Source:HGNC Symbol;Acc:HGNC:16154]	SNX21	19.1727	19.2001	23.4066	29.5168	29.1527	33.544
ENSG00000197951	0.580926	4.01249	11.8335	0.000581759	0.00305462	zinc finger protein 71 [Source:HGNC Symbol;Acc:HGNC:13141]	ZNF71	12.1715	12.6816	13.8066	21.778	17.5007	18.7303
ENSG00000138100	0.580872	8.0485	17.4166	3.00197e-05	0.000250101	tripartite motif containing 54 [Source:HGNC Symbol;Acc:HGNC:16008]	TRIM54	280.693	190.309	170.199	382.978	293.615	270.579
ENSG00000103550	0.580671	4.0779	12.8548	0.000336607	0.00191349	lysine rich nucleolar protein 1 [Source:HGNC Symbol;Acc:HGNC:34404]	KNOP1	12.9085	13.996	13.5882	18.775	19.6973	22.1969
ENSG00000128285	0.580398	-1.63822	1.73064	0.188329	0.317548	melanin concentrating hormone receptor 1 [Source:HGNC Symbol;Acc:HGNC:4479]	MCHR1	0.264848	0.0430979	0.408311	0.294411	0.0994355	0.655404
ENSG00000160570	0.58008	3.27649	11.3438	0.000756986	0.00381216	death effector domain containing 2 [Source:HGNC Symbol;Acc:HGNC:24450]	DEDD2	7.8418	6.83101	8.56503	11.4652	10.3503	12.9186
ENSG00000168769	0.580026	5.91302	11.7507	0.000608213	0.00316963	tet methylcytosine dioxygenase 2 [Source:HGNC Symbol;Acc:HGNC:25941]	TET2	36.6872	54.4973	55.0365	71.8446	74.3236	68.9753
ENSG00000160949	0.579957	2.48029	8.17939	0.0042369	0.0159045	tonsoku-like, DNA repair protein [Source:HGNC Symbol;Acc:HGNC:7801]	TONSL	4.92847	3.4586	4.99468	6.82191	5.44184	7.66743
ENSG00000173442	0.579782	6.98554	16.8194	4.11116e-05	0.00032728	EH domain binding protein 1 like 1 [Source:HGNC Symbol;Acc:HGNC:30682]	EHBP1L1	116.026	115.082	74.3031	170.077	170.423	114.293
ENSG00000278384	0.579687	3.69317	12.4938	0.000408308	0.0022672			5.72302	8.27479	16.7123	8.25191	12.1583	26.2714
ENSG00000171492	0.579663	3.26312	5.49371	0.019085	0.0537216	leucine rich repeat containing 8 family member D [Source:HGNC Symbol;Acc:HGNC:16992]	LRRC8D	8.04907	6.20609	8.24218	7.2425	15.4035	12.3026
ENSG00000072840	0.579565	4.72664	13.7296	0.000211105	0.00131027	EvC ciliary complex subunit 1 [Source:HGNC Symbol;Acc:HGNC:3497]	EVC	17.123	27.5611	19.4375	27.9017	37.0081	29.6748
ENSG00000204209	0.579484	3.85482	11.628	0.000649651	0.00335525	death domain associated protein [Source:HGNC Symbol;Acc:HGNC:2681]	DAXX	9.93755	10.2788	14.6992	17.5216	14.6893	19.5042
ENSG00000188176	0.579255	2.74989	9.13773	0.00250391	0.0102794	smoothelin like 2 [Source:HGNC Symbol;Acc:HGNC:24764]	SMTNL2	4.6406	4.93471	6.476	6.41815	7.63846	10.0758
ENSG00000139445	0.579001	-2.11705	0.947835	0.330271	0.478318	forkhead box N4 [Source:HGNC Symbol;Acc:HGNC:21399]	FOXN4	0.103636	0.237038	0.142434	0.294411	0.0994355	0.363236
ENSG00000066230	0.578858	-0.740526	3.13428	0.0766622	0.160695	solute carrier family 9 member A3 [Source:HGNC Symbol;Acc:HGNC:11073]	SLC9A3	0.379999	0.495626	0.503267	0.546762	0.795484	0.726472
ENSG00000185614	0.578625	1.74742	6.41768	0.0112989	0.0353161	family with sequence similarity 212 member A [Source:HGNC Symbol;Acc:HGNC:32480]	FAM212A	2.38363	2.71517	2.91515	3.53293	4.22149	4.21669
ENSG00000121904	0.578424	0.190914	3.92913	0.0474565	0.110104	CUB and Sushi multiple domains 2 [Source:HGNC Symbol;Acc:HGNC:19290]	CSMD2	0.391514	1.79934	0.550745	0.765467	2.54013	0.686989
ENSG00000179409	0.57828	4.18204	12.9294	0.000323465	0.00185923	gem nuclear organelle associated protein 4 [Source:HGNC Symbol;Acc:HGNC:15717]	GEMIN4	15.58	14.1146	13.9111	22.9556	19.851	22.339
ENSG00000162065	0.57819	4.12473	13.0401	0.000304895	0.00177219	TBC1 domain family member 24 [Source:HGNC Symbol;Acc:HGNC:29203]	TBC1D24	12.8048	13.6189	15.5538	19.8012	20.8905	21.8336
ENSG00000267795	0.578157	-1.32903	2.41148	0.120448	0.227884	small integral membrane protein 22 [Source:HGNC Symbol;Acc:HGNC:48329]	SMIM22	0.333939	0.290911	0.275372	0.538351	0.379663	0.434304
ENSG00000134775	0.578043	9.01154	18.6332	1.58438e-05	0.000145333	formin homology 2 domain containing 3 [Source:HGNC Symbol;Acc:HGNC:26178]	FHOD3	416.525	340.43	487.561	621.854	523.185	706.952
ENSG00000168481	0.577943	-2.14209	1.48303	0.223302	0.360291	leucine rich repeat LGI family member 3 [Source:HGNC Symbol;Acc:HGNC:18711]	LGI3	0.218787	0.183166	0.094956	0.361704	0.180792	0.197411
ENSG00000137267	0.577859	3.3182	9.0463	0.00263227	0.0107306	tubulin beta 2A class IIa [Source:HGNC Symbol;Acc:HGNC:12412]	TUBB2A	6.4715	8.0593	8.83091	7.20044	13.695	15.4138
ENSG00000103343	0.577758	2.8865	9.53092	0.00202039	0.00864994	zinc finger protein 174 [Source:HGNC Symbol;Acc:HGNC:12963]	ZNF174	6.18362	5.46266	6.06769	9.10149	7.81925	9.57047
ENSG00000166359	0.577259	0.191842	4.13106	0.0421031	0.100178	WD repeat domain 88 [Source:HGNC Symbol;Acc:HGNC:26999]	WDR88	0.909695	0.797311	0.959055	1.0767	1.24746	1.70563
ENSG00000125965	0.576926	-0.392266	3.52779	0.0603483	0.133134	growth differentiation factor 5 [Source:HGNC Symbol;Acc:HGNC:4220]	GDF5	0.47212	0.517175	0.778639	0.639292	0.867801	1.13709
ENSG00000134817	0.576627	3.51818	12.2152	0.000474009	0.00257128	apelin receptor [Source:HGNC Symbol;Acc:HGNC:339]	APLNR	5.50423	8.31789	13.7591	8.41173	12.2487	20.3017
ENSG00000140332	0.576588	3.83285	12.0751	0.000510985	0.00274323	transducin like enhancer of split 3 [Source:HGNC Symbol;Acc:HGNC:11839]	TLE3	10.4097	11.0654	12.8096	15.5953	18.1605	17.2932
ENSG00000186566	0.576138	5.77987	12.6938	0.000366876	0.0020636	G-patch domain containing 8 [Source:HGNC Symbol;Acc:HGNC:29066]	GPATCH8	42.606	45.1881	43.8602	77.6823	57.5641	62.595
ENSG00000165152	0.575956	6.13222	15.9116	6.63721e-05	0.000492045	transmembrane protein 246 [Source:HGNC Symbol;Acc:HGNC:28180]	TMEM246	53.3956	62.7182	52.3492	84.4454	96.6423	71.1547
ENSG00000213714	0.575932	-3.03346	0.865066	0.352325	0.500488	family with sequence similarity 209 member B [Source:HGNC Symbol;Acc:HGNC:16101]	FAM209B	0.103636	0.0323234	0.104452	0.0757056	0.0813564	0.205307
ENSG00000253873	0.575673	4.85011	14.0904	0.000174228	0.00111636	protocadherin gamma subfamily A, 11 [Source:HGNC Symbol;Acc:HGNC:8698]	PCDHGA11	25.506	19.2755	24.7645	36.2461	29.912	37.1843
ENSG00000174669	0.57567	3.88463	8.48709	0.00357675	0.0138247	solute carrier family 29 member 2 [Source:HGNC Symbol;Acc:HGNC:11004]	SLC29A2	17.0309	9.1152	9.28669	22.2995	10.6848	20.049
ENSG00000168924	0.575576	6.44936	17.2114	3.3442e-05	0.000273981	leucine zipper and EF-hand containing transmembrane protein 1 [Source:HGNC Symbol;Acc:HGNC:6556]	LETM1	79.2125	68.4502	63.0982	109.361	109.433	94.6229
ENSG00000243716	0.575519	4.83132	7.26283	0.00703964	0.0238348	nuclear pore complex interacting protein family member B5 [Source:HGNC Symbol;Acc:HGNC:37233]	NPIPB5	20.8884	24.5335	21.6974	44.9102	22.6894	35.9209
ENSG00000161682	0.575394	-0.109417	3.72344	0.0536539	0.12151	family with sequence similarity 171 member A2 [Source:HGNC Symbol;Acc:HGNC:30480]	FAM171A2	0.702423	0.81886	0.655196	1.03464	1.0034	1.20026
ENSG00000145014	0.575099	2.64525	8.39475	0.00376306	0.0144162	transmembrane protein 44 [Source:HGNC Symbol;Acc:HGNC:25120]	TMEM44	4.6406	4.93471	5.36501	6.39292	7.09608	8.93876
ENSG00000167393	0.575097	5.97875	14.0399	0.000178975	0.00114224	protein phosphatase 2 regulatory subunit B''beta [Source:HGNC Symbol;Acc:HGNC:13417]	PPP2R3B	55.5144	39.2298	55.8246	96.9031	54.1924	76.548
ENSG00000168040	0.574695	3.18208	10.4496	0.00122675	0.00567841	Fas associated via death domain [Source:HGNC Symbol;Acc:HGNC:3573]	FADD	6.45999	7.85459	7.35909	8.59679	13.0532	10.976
ENSG00000101665	0.57442	4.49918	13.3152	0.000263268	0.00157362	SMAD family member 7 [Source:HGNC Symbol;Acc:HGNC:6773]	SMAD7	19.1842	11.6149	23.6156	26.5895	17.817	36.6789
ENSG00000278570	0.574332	-1.97613	1.37068	0.241695	0.381705	nuclear receptor subfamily 2 group E member 3 [Source:HGNC Symbol;Acc:HGNC:7974]	NR2E3	0.0806059	0.40943	0.123443	0.24394	0.370623	0.181618
ENSG00000189241	0.574137	7.74669	15.4996	8.25219e-05	0.000593011	TSPY like 1 [Source:HGNC Symbol;Acc:HGNC:12382]	TSPYL1	202.056	159.441	157.684	260.814	273.502	235.014
ENSG00000178409	0.573692	2.28847	7.00227	0.00814064	0.0269366	BEN domain containing 3 [Source:HGNC Symbol;Acc:HGNC:23040]	BEND3	3.60423	5.19329	2.78221	5.91345	8.1266	3.56129
ENSG00000130294	0.573614	1.77929	6.34586	0.0117655	0.0364686	kinesin family member 1A [Source:HGNC Symbol;Acc:HGNC:888]	KIF1A	2.78666	2.29496	3.15254	4.13016	3.66104	4.40621
ENSG00000022976	0.573408	3.22741	10.5306	0.00117417	0.0054714	zinc finger protein 839 [Source:HGNC Symbol;Acc:HGNC:20345]	ZNF839	7.86483	6.47546	8.23268	10.8259	10.7571	11.8762
ENSG00000187866	0.57287	4.74258	13.4904	0.000239785	0.00146049	family with sequence similarity 122A [Source:HGNC Symbol;Acc:HGNC:23490]	FAM122A	22.489	23.3267	18.4405	30.8711	38.7256	26.6268
ENSG00000136514	0.572813	1.27581	4.53063	0.0332933	0.0834545	receptor transporter protein 4 [Source:HGNC Symbol;Acc:HGNC:23992]	RTP4	0.886665	2.34883	2.74423	1.94311	2.67572	3.7508
ENSG00000161896	0.572713	6.41959	15.7827	7.10502e-05	0.000522284	inositol hexakisphosphate kinase 3 [Source:HGNC Symbol;Acc:HGNC:17269]	IP6K3	109.946	76.4664	20.9663	144.631	130.875	30.6381
ENSG00000184292	0.572675	-0.959611	2.42531	0.11939	0.226363	tumor-associated calcium signal transducer 2 [Source:HGNC Symbol;Acc:HGNC:11530]	TACSTD2	0.287878	0.31246	0.522258	0.378528	0.370623	1.04233
ENSG00000120549	0.57267	6.19453	16.6229	4.55979e-05	0.000357822	KIAA1217 [Source:HGNC Symbol;Acc:HGNC:25428]	KIAA1217	66.8568	53.9801	55.065	107.157	78.301	77.9141
ENSG00000141873	0.572547	3.50022	11.7954	0.000593783	0.00310554	solute carrier family 39 member 3 [Source:HGNC Symbol;Acc:HGNC:17128]	SLC39A3	8.50968	9.1152	9.53358	11.5577	14.8973	14.1188
ENSG00000136444	0.572296	4.54409	8.69093	0.00319797	0.0125761	radical S-adenosyl methionine domain containing 1 [Source:HGNC Symbol;Acc:HGNC:25634]	RSAD1	21.706	15.1812	19.2666	27.0858	33.4465	23.1444
ENSG00000135116	0.571651	-1.25047	1.89857	0.168238	0.291682	harakiri, BCL2 interacting protein [Source:HGNC Symbol;Acc:HGNC:5185]	HRK	0.184242	0.19394	0.588727	0.201882	0.515257	0.679093
ENSG00000174429	0.571651	5.35382	12.875	0.000333008	0.00189977	actin binding Rho activating protein [Source:HGNC Symbol;Acc:HGNC:30655]	ABRA	41.2357	43.3026	13.3983	53.507	73.98	19.8358
ENSG00000165879	0.571623	3.02681	9.29996	0.00229159	0.00956474	FRAT1, WNT signaling pathway regulator [Source:HGNC Symbol;Acc:HGNC:3944]	FRAT1	7.39271	6.72327	5.53593	9.05943	10.8927	9.15196
ENSG00000107104	0.57141	8.39145	17.4773	2.90755e-05	0.000243435	KN motif and ankyrin repeat domains 1 [Source:HGNC Symbol;Acc:HGNC:19309]	KANK1	350.52	220.349	241.274	507.404	330.876	364.215
ENSG00000144596	0.571363	6.16512	15.0175	0.000106521	0.000733881	glutamate receptor interacting protein 2 [Source:HGNC Symbol;Acc:HGNC:23841]	GRIP2	66.1774	56.2104	51.2003	89.4924	79.6388	87.6898
ENSG00000180884	0.571132	3.67475	12.0643	0.000513976	0.00275467	zinc finger protein 792 [Source:HGNC Symbol;Acc:HGNC:24751]	ZNF792	9.23513	9.2445	12.0974	12.1634	14.4001	19.3068
ENSG00000121753	0.570941	2.91812	9.54054	0.00200982	0.00861391	adhesion G protein-coupled receptor B2 [Source:HGNC Symbol;Acc:HGNC:944]	ADGRB2	5.98787	6.06603	6.11516	8.52949	9.64525	8.8519
ENSG00000274180	0.570793	5.00343	12.8835	0.00033149	0.00189246	N-acetyltransferase domain containing 1 [Source:HGNC Symbol;Acc:HGNC:30770]	NATD1	24.4236	24.7274	28.2019	41.3437	34.9561	38.6372
ENSG00000121903	0.57061	4.39855	12.3758	0.000434933	0.00238692	zinc finger and SCAN domain containing 20 [Source:HGNC Symbol;Acc:HGNC:13093]	ZSCAN20	16.9618	20.4823	12.7621	24.7053	34.4589	17.0405
ENSG00000183785	0.5706	5.74499	11.5767	0.00066784	0.00343017	tubulin alpha 8 [Source:HGNC Symbol;Acc:HGNC:12410]	TUBA8	48.1102	41.1477	38.6281	72.1811	75.8151	45.7598
ENSG00000052850	0.570537	0.241065	3.75356	0.0526951	0.119813	ALX homeobox 4 [Source:HGNC Symbol;Acc:HGNC:450]	ALX4	0.518181	1.03435	1.31039	1.06829	1.55481	1.44505
ENSG00000151474	0.570454	5.56585	12.9339	0.000322689	0.00185544	FERM domain containing 4A [Source:HGNC Symbol;Acc:HGNC:25491]	FRMD4A	37.4472	39.6931	36.8809	60.3037	49.0036	60.7156
ENSG00000152467	0.570415	0.746527	4.49509	0.0339924	0.0848091	zinc finger and SCAN domain containing 1 [Source:HGNC Symbol;Acc:HGNC:23712]	ZSCAN1	1.50848	0.958928	1.44333	1.91787	1.24746	2.81903
ENSG00000130254	0.570329	5.9205	14.9829	0.00010849	0.000745521	scaffold attachment factor B2 [Source:HGNC Symbol;Acc:HGNC:21605]	SAFB2	52.5205	43.0979	50.4976	78.6833	63.2048	75.2451
ENSG00000159792	0.570167	4.93223	13.8348	0.000199607	0.00125341	protein serine kinase H1 [Source:HGNC Symbol;Acc:HGNC:9529]	PSKH1	24.9763	26.6129	22.1627	37.2808	37.6861	34.3179
ENSG00000277288	0.569861	-1.69489	1.65088	0.198839	0.33071	chromosome 10 open reading frame 142 [Source:HGNC Symbol;Acc:HGNC:51236]	C10orf142	0.333939	0.107745	0.275372	0.319646	0.289267	0.394821
ENSG00000133619	0.569798	5.70341	13.8394	0.000199114	0.0012508	KRAB-A domain containing 1 [Source:HGNC Symbol;Acc:HGNC:22228]	KRBA1	56.6774	37.7861	31.5444	78.5235	64.0094	43.9673
ENSG00000145491	0.569774	-2.83962	0.992215	0.319202	0.466943	rhophilin associated tail protein 1 like [Source:HGNC Symbol;Acc:HGNC:24060]	ROPN1L	0.0575756	0.0969702	0.132938	0.134588	0.180792	0.11055
ENSG00000184451	0.569758	1.46859	5.8644	0.0154502	0.0455117	C-C motif chemokine receptor 10 [Source:HGNC Symbol;Acc:HGNC:4474]	CCR10	2.61393	1.67004	2.32642	3.5161	2.42261	3.89294
ENSG00000007047	0.569732	4.27148	12.9039	0.000327892	0.00187794	microtubule affinity regulating kinase 4 [Source:HGNC Symbol;Acc:HGNC:13538]	MARK4	14.8315	16.0432	15.6962	23.1407	24.1176	21.8889
ENSG00000165632	0.569682	4.26198	12.7663	0.000352916	0.00199488	TATA-box binding protein associated factor 3 [Source:HGNC Symbol;Acc:HGNC:17303]	TAF3	15.7066	14.7287	15.8197	24.4613	22.2012	22.0389
ENSG00000089159	0.569354	6.14931	10.0247	0.00154458	0.00692169	paxillin [Source:HGNC Symbol;Acc:HGNC:9718]	PXN	58.5429	62.0394	47.2596	122.424	68.8004	66.6459
ENSG00000166035	0.569226	-1.13831	2.14763	0.14279	0.258125	lipase C, hepatic type [Source:HGNC Symbol;Acc:HGNC:6619]	LIPC	0.264848	0.398655	0.370328	0.580409	0.379663	0.584336
ENSG00000164484	0.569034	0.284152	3.66252	0.0556493	0.124899	transmembrane protein 200A [Source:HGNC Symbol;Acc:HGNC:21075]	TMEM200A	0.241818	1.81011	0.71217	0.252352	2.96499	1.19236
ENSG00000118194	0.568783	11.5127	17.6964	2.59118e-05	0.000221106	troponin T2, cardiac type [Source:HGNC Symbol;Acc:HGNC:11949]	TNNT2	3044.08	1708.62	2353.92	3903.31	2630.17	3891.14
ENSG00000196313	0.568772	5.05546	11.0652	0.000879615	0.00433318	POM121 transmembrane nucleoporin [Source:HGNC Symbol;Acc:HGNC:19702]	POM121	25.2527	27.3133	27.2144	44.7925	31.738	43.0434
ENSG00000232810	0.568197	-1.17392	2.16944	0.140778	0.255517	tumor necrosis factor [Source:HGNC Symbol;Acc:HGNC:11892]	TNF	0.149697	0.204715	0.626709	0.176646	0.343505	0.979157
ENSG00000197893	0.56802	11.6314	19.8687	8.2949e-06	8.40239e-05	nebulin related anchoring protein [Source:HGNC Symbol;Acc:HGNC:7988]	NRAP	3184.19	2488.9	1978	4839.37	3660.7	2883.05
ENSG00000226887	0.56802	3.07394	10.2474	0.00136879	0.00623327	endogenous retrovirus group MER34 member 1 [Source:HGNC Symbol;Acc:HGNC:42970]	ERVMER34-1	8.57877	6.68017	4.90922	13.2401	10.2057	6.77514
ENSG00000158773	0.567606	4.29364	11.0094	0.000906493	0.00443288	upstream transcription factor 1 [Source:HGNC Symbol;Acc:HGNC:12593]	USF1	13.2769	11.9812	23.0268	21.4836	20.2939	27.4243
ENSG00000158955	0.567095	-1.65303	1.87615	0.170772	0.295245	Wnt family member 9B [Source:HGNC Symbol;Acc:HGNC:12779]	WNT9B	0.172727	0.161617	0.370328	0.319646	0.198871	0.529061
ENSG00000143867	0.566689	3.87042	11.6456	0.000643538	0.00333252	odd-skipped related transciption factor 1 [Source:HGNC Symbol;Acc:HGNC:8111]	OSR1	5.34302	19.0062	10.1223	7.50326	31.6115	14.0241
ENSG00000175874	0.566608	-1.17227	2.20773	0.137321	0.250748	cellular repressor of E1A stimulated genes 2 [Source:HGNC Symbol;Acc:HGNC:14272]	CREG2	0.333939	0.430979	0.246886	0.336469	0.723168	0.465889
ENSG00000137204	0.566263	-0.320519	3.24572	0.0716103	0.152027	solute carrier family 22 member 7 [Source:HGNC Symbol;Acc:HGNC:10971]	SLC22A7	0.379999	0.980477	0.531753	0.504704	1.27458	0.99495
ENSG00000099860	0.566258	4.81513	3.12549	0.0770765	0.161394	growth arrest and DNA damage inducible beta [Source:HGNC Symbol;Acc:HGNC:4096]	GADD45B	31.8048	15.1597	20.9853	18.8423	41.8172	40.1533
ENSG00000160877	0.566194	5.13922	13.7058	0.000213788	0.00132481	nucleus accumbens associated 1 [Source:HGNC Symbol;Acc:HGNC:20967]	NACC1	31.3096	29.2311	24.4891	45.9196	45.659	34.6969
ENSG00000174502	0.566189	4.4712	13.0627	0.000301234	0.0017541	solute carrier family 26 member 9 [Source:HGNC Symbol;Acc:HGNC:14469]	SLC26A9	24.9648	15.3752	13.5597	34.7236	24.2171	20.1043
ENSG00000130787	0.56605	5.58647	14.3195	0.000154256	0.00100323	huntingtin interacting protein 1 related [Source:HGNC Symbol;Acc:HGNC:18415]	HIP1R	47.9605	31.6446	37.1088	65.7629	49.3923	56.2779
ENSG00000130559	0.565963	5.59228	14.0676	0.00017636	0.00112776	calmodulin regulated spectrin associated protein 1 [Source:HGNC Symbol;Acc:HGNC:19946]	CAMSAP1	36.4339	40.846	39.2453	57.5783	62.78	52.4244
ENSG00000174032	0.565906	7.00411	6.78735	0.0091806	0.029733	solute carrier family 25 member 30 [Source:HGNC Symbol;Acc:HGNC:27371]	SLC25A30	92.5125	75.5398	144.836	115.316	192.778	149.037
ENSG00000021762	0.565864	4.44357	13.0442	0.000304233	0.00176899	oxysterol binding protein like 5 [Source:HGNC Symbol;Acc:HGNC:16392]	OSBPL5	17.2727	17.1745	18.0796	25.8072	24.1448	27.9139
ENSG00000204779	0.565844	-1.94581	1.43567	0.230842	0.369149	forkhead box D4-like 5 [Source:HGNC Symbol;Acc:HGNC:18522]	FOXD4L5	0.195757	0.172392	0.180416	0.294411	0.144634	0.426407
ENSG00000132906	0.565323	3.18046	9.32582	0.00225948	0.00946369	caspase 9 [Source:HGNC Symbol;Acc:HGNC:1511]	CASP9	5.95332	6.08758	9.76147	10.7165	7.58422	14.103
ENSG00000189320	0.565025	4.08783	12.2262	0.00047124	0.00255727	family with sequence similarity 180 member A [Source:HGNC Symbol;Acc:HGNC:33773]	FAM180A	13.1042	13.4358	14.5188	18.7329	21.8125	20.2622
ENSG00000159239	0.564772	0.3824	4.17013	0.0411427	0.0983606	chromosome 2 open reading frame 81 [Source:HGNC Symbol;Acc:HGNC:34350]	C2orf81	0.759998	1.099	1.21544	1.0767	1.96159	1.5556
ENSG00000162817	0.56467	4.56256	12.286	0.000456375	0.00248586	chromosome 1 open reading frame 115 [Source:HGNC Symbol;Acc:HGNC:25873]	C1orf115	20.923	12.6277	23.7105	26.3792	20.547	37.4133
ENSG00000077157	0.564661	10.4748	9.50209	0.00205238	0.00876117	protein phosphatase 1 regulatory subunit 12B [Source:HGNC Symbol;Acc:HGNC:7619]	PPP1R12B	851.716	1168.53	1458.36	1924.55	1487.66	1647.46
ENSG00000128655	0.564346	1.60544	4.51996	0.0335016	0.0838325	phosphodiesterase 11A [Source:HGNC Symbol;Acc:HGNC:8773]	PDE11A	2.46424	2.59665	2.14601	2.7254	3.43505	4.72996
ENSG00000157510	0.564063	6.13064	13.7037	0.000214033	0.00132529	actin filament associated protein 1 like 1 [Source:HGNC Symbol;Acc:HGNC:26714]	AFAP1L1	59.9132	62.0609	48.0857	77.8253	86.9428	85.4157
ENSG00000144648	0.563818	-0.428089	2.56355	0.109353	0.211538	atypical chemokine receptor 2 [Source:HGNC Symbol;Acc:HGNC:1565]	ACKR2	0.564241	0.40943	0.645701	0.672938	0.433901	1.5556
ENSG00000197380	0.563788	3.02117	9.75017	0.00179306	0.00783365	dishevelled binding antagonist of beta catenin 3 [Source:HGNC Symbol;Acc:HGNC:30745]	DACT3	6.43696	8.58725	4.60536	8.84073	12.8905	7.21734
ENSG00000175592	0.563483	-0.000287619	3.60868	0.0574786	0.128063	FOS like 1, AP-1 transcription factor subunit [Source:HGNC Symbol;Acc:HGNC:13718]	FOSL1	0.276363	0.560272	1.46232	0.403763	0.768366	2.32155
ENSG00000139540	0.563478	-1.5588	1.50205	0.220356	0.357085	solute carrier family 39 member 5 [Source:HGNC Symbol;Acc:HGNC:20502]	SLC39A5	0.138182	0.398655	0.227894	0.218705	0.316386	0.592232
ENSG00000183960	0.563326	-1.07839	2.30895	0.128631	0.239132	potassium voltage-gated channel subfamily H member 8 [Source:HGNC Symbol;Acc:HGNC:18864]	KCNH8	0.218787	0.269362	0.579231	0.395351	0.307346	0.900193
ENSG00000158352	0.563304	6.13844	15.5433	8.06377e-05	0.000581556	shroom family member 4 [Source:HGNC Symbol;Acc:HGNC:29215]	SHROOM4	56.4587	57.2555	56.7362	84.908	79.5123	87.6425
ENSG00000184730	0.563183	1.15193	4.74935	0.0293093	0.0751972	apolipoprotein B receptor [Source:HGNC Symbol;Acc:HGNC:24087]	APOBR	0.978786	1.34681	2.73473	1.32905	1.69944	5.03003
ENSG00000221866	0.563019	5.95958	13.9908	0.000183709	0.00116634	plexin A4 [Source:HGNC Symbol;Acc:HGNC:9102]	PLXNA4	40.9248	62.0717	48.5415	68.1182	84.3123	69.2675
ENSG00000126217	0.563004	6.46571	13.4489	0.000245156	0.0014848	MCF.2 cell line derived transforming sequence like [Source:HGNC Symbol;Acc:HGNC:14576]	MCF2L	83.1392	62.3303	66.0704	128.119	73.745	116.733
ENSG00000160539	0.562558	6.25826	15.0352	0.000105527	0.000729853	phospholipid phosphatase 7 (inactive) [Source:HGNC Symbol;Acc:HGNC:28174]	PLPP7	62.2277	47.3753	76.9713	83.3098	81.5281	107.692
ENSG00000197261	0.562363	-0.401973	3.01885	0.0823017	0.169872	chromosome 6 open reading frame 141 [Source:HGNC Symbol;Acc:HGNC:21351]	C6orf141	0.564241	0.323234	0.845108	0.614056	0.542376	1.47663
ENSG00000153820	0.561948	7.62228	15.0858	0.000102734	0.000716504	SPHK1 interactor, AKAP domain containing [Source:HGNC Symbol;Acc:HGNC:30619]	SPHKAP	150.998	107.077	223.289	251.258	159.495	289.886
ENSG00000141568	0.561938	5.47079	11.4421	0.000717981	0.00364449	forkhead box K2 [Source:HGNC Symbol;Acc:HGNC:6036]	FOXK2	38.1842	34.8231	33.1301	67.235	40.2533	52.2981
ENSG00000142409	0.561895	4.34066	11.3712	0.000745908	0.00376834	zinc finger protein 787 [Source:HGNC Symbol;Acc:HGNC:26998]	ZNF787	17.7563	15.2782	15.9336	22.0808	27.2634	23.105
ENSG00000182584	0.561482	1.87236	6.20139	0.012765	0.0389337	actin like 10 [Source:HGNC Symbol;Acc:HGNC:16127]	ACTL10	2.85575	2.56432	3.40892	4.11334	4.14013	4.72206
ENSG00000101040	0.561444	5.76795	13.8133	0.000201904	0.00126669	zinc finger MYND-type containing 8 [Source:HGNC Symbol;Acc:HGNC:9397]	ZMYND8	46.7629	51.739	33.358	75.4616	71.2139	48.2709
ENSG00000127533	0.561397	2.01609	6.34781	0.0117526	0.0364426	F2R like thrombin/trypsin receptor 3 [Source:HGNC Symbol;Acc:HGNC:3540]	F2RL3	3.17817	5.08555	1.39585	4.83674	7.73789	1.92673
ENSG00000112139	0.561381	3.28046	9.90727	0.00164627	0.00729777	MAM domain containing glycosylphosphatidylinositol anchor 1 [Source:HGNC Symbol;Acc:HGNC:19267]	MDGA1	5.78059	13.8775	4.5199	9.1772	17.5459	7.28051
ENSG00000108963	0.561374	4.64695	13.2191	0.000277114	0.00163504	diphthamide biosynthesis 1 [Source:HGNC Symbol;Acc:HGNC:3003]	DPH1	20.0709	17.7348	22.8274	29.3233	26.1696	34.0257
ENSG00000161180	0.561314	-1.3663	1.86472	0.172081	0.296995	coiled-coil domain containing 116 [Source:HGNC Symbol;Acc:HGNC:26688]	CCDC116	0.287878	0.150843	0.398815	0.277587	0.235029	0.813332
ENSG00000155760	0.561255	5.53225	13.5223	0.000235741	0.00143969	frizzled class receptor 7 [Source:HGNC Symbol;Acc:HGNC:4045]	FZD7	27.0605	36.3531	48.2091	36.6247	60.502	68.7384
ENSG00000103064	0.560606	6.30215	10.4269	0.00124191	0.00574021	solute carrier family 7 member 6 [Source:HGNC Symbol;Acc:HGNC:11064]	SLC7A6	81.9762	70.896	39.2358	133.023	74.1337	74.0606
ENSG00000107957	0.560496	7.02035	14.0148	0.000181379	0.00115387	SH3 and PX domains 2A [Source:HGNC Symbol;Acc:HGNC:23664]	SH3PXD2A	90.0943	134.099	90.8919	157.661	185.583	120.436
ENSG00000113209	0.560396	2.85576	7.98808	0.00470863	0.0172313	protocadherin beta 5 [Source:HGNC Symbol;Acc:HGNC:8690]	PCDHB5	1.66969	5.6566	9.75198	2.0777	9.64525	14.4189
ENSG00000132467	0.560149	4.2914	12.554	0.000395363	0.00220449	UTP3, small subunit processome component homolog (S. cerevisiae) [Source:HGNC Symbol;Acc:HGNC:24477]	UTP3	14.7048	17.3146	15.3354	20.6929	26.251	23.0339
ENSG00000153786	0.560126	5.65154	13.3565	0.000257522	0.00154793	zinc finger DHHC-type containing 7 [Source:HGNC Symbol;Acc:HGNC:18459]	ZDHHC7	43.6193	40.3612	37.5646	59.1765	68.2128	52.5192
ENSG00000170260	0.560102	2.85387	7.8843	0.00498657	0.0180628	zinc finger protein 212 [Source:HGNC Symbol;Acc:HGNC:13004]	ZNF212	4.42181	6.80947	6.39054	8.16779	8.57858	8.844
ENSG00000179314	0.560022	2.20948	6.18599	0.0128765	0.0391996	WSC domain containing 1 [Source:HGNC Symbol;Acc:HGNC:29060]	WSCD1	4.5715	3.52325	3.14304	5.41715	5.55935	5.39326
ENSG00000130021	0.55989	3.41386	8.22275	0.00413685	0.0155874	pseudouridine 5'-phosphatase [Source:HGNC Symbol;Acc:HGNC:16818]	PUDP	7.11635	11.5826	7.43505	13.5513	12.4475	11.663
ENSG00000101849	0.559835	4.00278	10.0439	0.00152852	0.00686122	transducin beta like 1X-linked [Source:HGNC Symbol;Acc:HGNC:11585]	TBL1X	11.3079	13.6405	13.8636	21.2144	18.6487	17.3485
ENSG00000140488	0.559693	0.893113	2.41149	0.120448	0.227884	CUGBP Elav-like family member 6 [Source:HGNC Symbol;Acc:HGNC:14059]	CELF6	2.27999	0.484851	1.96559	1.57299	1.42826	3.25333
ENSG00000040531	0.55951	4.09502	12.0854	0.000508178	0.00273182	cystinosin, lysosomal cystine transporter [Source:HGNC Symbol;Acc:HGNC:2518]	CTNS	12.8048	14.6641	13.93	20.4069	21.2973	19.2752
ENSG00000102057	0.559339	-0.243999	2.91908	0.0875379	0.178404	potassium voltage-gated channel subfamily D member 1 [Source:HGNC Symbol;Acc:HGNC:6237]	KCND1	0.379999	1.26061	0.47478	0.731821	1.2565	0.837022
ENSG00000151240	0.559295	6.36207	11.9778	0.000538392	0.00286065	disco interacting protein 2 homolog C [Source:HGNC Symbol;Acc:HGNC:29150]	DIP2C	56.7926	57.902	86.9987	103.204	90.7304	97.742
ENSG00000132464	0.559018	4.25864	10.7583	0.00103815	0.0049631	enamelin [Source:HGNC Symbol;Acc:HGNC:3344]	ENAM	17.8024	13.6513	14.3478	30.4084	21.243	17.2458
ENSG00000133895	0.558827	2.83598	8.91387	0.00283014	0.0113809	menin 1 [Source:HGNC Symbol;Acc:HGNC:7010]	MEN1	5.83817	5.16097	6.27659	8.47061	7.95484	8.97824
ENSG00000072518	0.558814	4.37245	11.5191	0.000688839	0.00351998	microtubule affinity regulating kinase 2 [Source:HGNC Symbol;Acc:HGNC:3332]	MARK2	15.96	16.9159	17.187	27.7419	22.0114	24.2973
ENSG00000124615	0.558764	5.27198	12.4095	0.000427147	0.00235305	molybdenum cofactor synthesis 1 [Source:HGNC Symbol;Acc:HGNC:7190]	MOCS1	29.9163	29.3604	34.0892	51.5387	38.4092	48.3498
ENSG00000176994	0.558514	5.73918	13.7295	0.000211114	0.00131027	Smith-Magenis syndrome chromosome region, candidate 8 [Source:HGNC Symbol;Acc:HGNC:17921]	SMCR8	40.6945	40.4258	48.6839	62.1459	62.6625	65.7141
ENSG00000274286	0.558338	3.45737	9.92688	0.00162883	0.00723619	adrenoceptor alpha 2B [Source:HGNC Symbol;Acc:HGNC:282]	ADRA2B	13.9103	5.37646	8.03328	16.7814	9.31982	12.3421
ENSG00000169933	0.558258	3.43415	9.97097	0.00159028	0.0070947	FERM and PDZ domain containing 4 [Source:HGNC Symbol;Acc:HGNC:29007]	FRMPD4	10.7897	6.97108	8.6315	13.2317	12.0407	13.037
ENSG00000115461	0.558091	8.72301	15.5417	8.07064e-05	0.00058179	insulin like growth factor binding protein 5 [Source:HGNC Symbol;Acc:HGNC:5474]	IGFBP5	193.316	590.506	263.417	330.388	789.527	368.076
ENSG00000115556	0.557972	1.53543	5.00476	0.0252777	0.0668329	phospholipase C delta 4 [Source:HGNC Symbol;Acc:HGNC:9062]	PLCD4	1.64666	2.41348	2.98162	3.22169	2.99211	3.96401
ENSG00000008083	0.557832	5.16102	13.3304	0.000261138	0.00156322	jumonji and AT-rich interaction domain containing 2 [Source:HGNC Symbol;Acc:HGNC:6196]	JARID2	31.5399	28.0352	26.996	49.503	38.6985	39.7427
ENSG00000133943	0.55759	7.41	16.0349	6.21859e-05	0.00046415	chromosome 14 open reading frame 159 [Source:HGNC Symbol;Acc:HGNC:20498]	C14orf159	158.183	114.371	140.687	232.357	174.356	200.317
ENSG00000175544	0.557439	-0.828621	2.31824	0.127865	0.238371	calcium binding protein 4 [Source:HGNC Symbol;Acc:HGNC:1386]	CABP4	0.437575	0.430979	0.408311	0.513116	0.497178	0.939675
ENSG00000155846	0.557304	6.07133	11.8762	0.000568565	0.00299538	PPARG coactivator 1 beta [Source:HGNC Symbol;Acc:HGNC:30022]	PPARGC1B	34.3957	49.6057	82.042	64.2572	63.5845	109.381
ENSG00000184916	0.557286	4.84683	9.35098	0.00222866	0.0093493	jagged 2 [Source:HGNC Symbol;Acc:HGNC:6189]	JAG2	25.9781	17.4654	25.79	27.4979	28.8182	46.9364
ENSG00000183378	0.557116	-2.81112	0.869176	0.351183	0.499442	ovochymase 2 (gene/pseudogene) [Source:HGNC Symbol;Acc:HGNC:29970]	OVCH2	0.0460605	0.172392	0.0854604	0.100941	0.117515	0.205307
ENSG00000161021	0.557084	5.26547	12.247	0.000466	0.00253312	mastermind like transcriptional coactivator 1 [Source:HGNC Symbol;Acc:HGNC:13632]	MAML1	29.2599	30.0392	33.7379	49.7974	38.4092	49.3764
ENSG00000163873	0.556987	1.59178	5.47165	0.0193274	0.0542324	glutamate ionotropic receptor kainate type subunit 3 [Source:HGNC Symbol;Acc:HGNC:4581]	GRIK3	1.88848	1.79934	3.61782	3.2301	2.51301	4.84841
ENSG00000141084	0.55683	4.51867	10.7271	0.00105577	0.00502936	RAN binding protein 10 [Source:HGNC Symbol;Acc:HGNC:29285]	RANBP10	16.006	19.4048	20.2256	29.5504	24.3436	27.8349
ENSG00000161267	0.556645	5.69224	13.4116	0.000250077	0.00150884	3-hydroxybutyrate dehydrogenase 1 [Source:HGNC Symbol;Acc:HGNC:1027]	BDH1	46.8435	36.7625	42.2269	63.2983	60.7822	60.1629
ENSG00000186583	0.556555	1.02723	4.98419	0.0255799	0.067443	spermatogenesis and centriole associated 1 [Source:HGNC Symbol;Acc:HGNC:30510]	SPATC1	2.24545	1.58385	1.12048	3.02822	2.24182	1.87935
ENSG00000090857	0.556535	6.02226	11.6448	0.000643837	0.00333252	pyruvate dehydrogenase phosphatase regulatory subunit [Source:HGNC Symbol;Acc:HGNC:30264]	PDPR	59.6484	52.5255	45.7688	75.7224	69.9213	86.229
ENSG00000114737	0.556373	3.79001	10.9589	0.000931557	0.00453194	cytokine inducible SH2 containing protein [Source:HGNC Symbol;Acc:HGNC:1984]	CISH	9.45392	10.8499	13.0185	14.1485	14.1289	21.2177
ENSG00000177535	0.556169	-2.59683	0.948875	0.330006	0.478064	olfactory receptor family 2 subfamily B member 11 [Source:HGNC Symbol;Acc:HGNC:31249]	OR2B11	0.0230303	0.290911	0.0759648	0.0504704	0.271188	0.165825
ENSG00000109805	0.556083	-1.32215	2.14628	0.142915	0.258247	non-SMC condensin I complex subunit G [Source:HGNC Symbol;Acc:HGNC:24304]	NCAPG	0.264848	0.495626	0.161425	0.378528	0.750286	0.236893
ENSG00000165801	0.555817	5.48206	13.4087	0.000250462	0.00151012	Rho guanine nucleotide exchange factor 40 [Source:HGNC Symbol;Acc:HGNC:25516]	ARHGEF40	30.5266	46.341	32.361	46.3234	60.954	51.5163
ENSG00000235098	0.555814	0.680475	4.54977	0.0329231	0.082656	ankyrin repeat domain 65 [Source:HGNC Symbol;Acc:HGNC:42950]	ANKRD65	0.690908	1.32526	1.83265	1.11876	1.81696	2.6532
ENSG00000170745	0.555599	2.36089	7.19235	0.00732152	0.0246227	potassium voltage-gated channel modifier subfamily S member 3 [Source:HGNC Symbol;Acc:HGNC:6302]	KCNS3	3.32787	4.67612	4.36797	4.71057	7.36727	6.21449
ENSG00000180185	0.555453	4.34001	11.5634	0.000672638	0.0034515	fumarylacetoacetate hydrolase domain containing 1 [Source:HGNC Symbol;Acc:HGNC:14169]	FAHD1	17.4109	12.1752	19.8553	22.1649	21.0171	28.7193
ENSG00000173480	0.555396	5.26765	13.1033	0.000294776	0.00172275	zinc finger protein 417 [Source:HGNC Symbol;Acc:HGNC:20646]	ZNF417	28.4884	32.3557	32.7218	44.313	49.0217	44.0779
ENSG00000135414	0.555366	5.153	12.7132	0.000363077	0.00204367	growth differentiation factor 11 [Source:HGNC Symbol;Acc:HGNC:4216]	GDF11	26.4848	33.0992	26.2268	39.5267	53.5054	34.4916
ENSG00000105447	0.555039	4.27339	12.306	0.000451502	0.00246351	glutamate rich WD repeat containing 1 [Source:HGNC Symbol;Acc:HGNC:21270]	GRWD1	15.58	16.9806	14.2909	22.1229	26.3052	20.6018
ENSG00000170776	0.554942	9.61798	17.0169	3.70493e-05	0.000299554	A-kinase anchoring protein 13 [Source:HGNC Symbol;Acc:HGNC:371]	AKAP13	525.896	791.622	591.224	817.242	1177.66	810.892
ENSG00000124160	0.554877	3.94117	10.951	0.000935539	0.00454855	nuclear receptor coactivator 5 [Source:HGNC Symbol;Acc:HGNC:15909]	NCOA5	10.6515	12.8863	13.8446	18.0852	18.3865	18.146
ENSG00000272899	0.554778	2.45461	6.98008	0.00824217	0.0271939			4.41029	6.82024	1.7187	7.2425	10.4588	2.13204
ENSG00000142039	0.554519	3.68754	9.4487	0.00211299	0.00896474	coiled-coil domain containing 97 [Source:HGNC Symbol;Acc:HGNC:28289]	CCDC97	8.69392	10.8391	11.6891	15.9402	12.6374	17.3327
ENSG00000185085	0.554324	3.83283	11.6059	0.000657422	0.00338861	integrator complex subunit 5 [Source:HGNC Symbol;Acc:HGNC:29352]	INTS5	10.686	12.0028	11.879	15.8141	18.034	16.922
ENSG00000149658	0.554274	5.01655	12.7467	0.000356637	0.00201371	YTH N6-methyladenosine RNA binding protein 1 [Source:HGNC Symbol;Acc:HGNC:15867]	YTHDF1	27.6018	25.0614	25.9515	39.4594	39.6477	36.3394
ENSG00000183307	0.55407	1.15336	4.9717	0.0257653	0.0678425	cat eye syndrome chromosome region, candidate 6 [Source:HGNC Symbol;Acc:HGNC:1844]	CECR6	1.02485	1.19597	3.11456	1.41317	1.90735	4.48517
ENSG00000123689	0.554032	4.84547	11.1937	0.000820775	0.00408476	G0/G1 switch 2 [Source:HGNC Symbol;Acc:HGNC:30229]	G0S2	19.6103	12.4984	35.3521	23.923	18.2509	62.6424
ENSG00000182580	0.553895	1.11446	4.4278	0.035358	0.0875213	EPH receptor B3 [Source:HGNC Symbol;Acc:HGNC:3394]	EPHB3	0.990301	1.4761	2.52583	1.06829	2.49493	4.24038
ENSG00000149735	0.553387	-2.76608	1.04601	0.306429	0.453586	glycoprotein hormone alpha 2 [Source:HGNC Symbol;Acc:HGNC:18054]	GPHA2	0.126666	0.0646468	0.113947	0.134588	0.108475	0.205307
ENSG00000163092	0.552971	11.999	17.2696	3.24334e-05	0.000267029	xin actin binding repeat containing 2 [Source:HGNC Symbol;Acc:HGNC:14303]	XIRP2	3143.47	5295.87	1159.55	4599.84	8865.7	1494.66
ENSG00000163251	0.552922	3.36612	9.25338	0.00235061	0.00976629	frizzled class receptor 5 [Source:HGNC Symbol;Acc:HGNC:4043]	FZD5	6.4715	7.42361	10.806	10.6829	8.69609	17.5932
ENSG00000180346	0.552689	2.15966	6.62232	0.0100709	0.0320719	tigger transposable element derived 2 [Source:HGNC Symbol;Acc:HGNC:18333]	TIGD2	3.39696	3.92191	3.48488	5.01339	5.79438	5.04582
ENSG00000111254	0.552633	0.797738	4.73847	0.0294953	0.0755534	A-kinase anchoring protein 3 [Source:HGNC Symbol;Acc:HGNC:373]	AKAP3	2.02666	1.28216	0.826117	3.09552	1.97967	1.0976
ENSG00000153406	0.552232	2.91531	7.9299	0.00486244	0.0177015	NmrA like redox sensor 1 [Source:HGNC Symbol;Acc:HGNC:24987]	NMRAL1	5.98787	4.62225	7.31161	9.85014	5.40568	11.8999
ENSG00000175764	0.552134	2.47798	6.65702	0.00987658	0.0315409	tubulin tyrosine ligase like 11 [Source:HGNC Symbol;Acc:HGNC:18113]	TTLL11	4.14545	5.32259	3.73177	5.93027	9.63621	4.52465
ENSG00000240184	0.552089	4.49926	11.8883	0.000564881	0.00298163	protocadherin gamma subfamily C, 3 [Source:HGNC Symbol;Acc:HGNC:8716]	PCDHGC3	28.4539	11.561	13.7116	46.9711	16.1538	18.6987
ENSG00000011590	0.552019	0.606031	4.49616	0.0339711	0.0847955	zinc finger and BTB domain containing 32 [Source:HGNC Symbol;Acc:HGNC:16763]	ZBTB32	0.886665	1.49765	1.27241	1.38794	2.09719	1.83987
ENSG00000151136	0.551948	1.59165	5.48282	0.0192043	0.053972	BTB domain containing 11 [Source:HGNC Symbol;Acc:HGNC:23844]	BTBD11	3.43151	1.48688	2.41188	4.54233	2.25086	3.80608
ENSG00000182983	0.551904	3.42311	6.94463	0.00840713	0.0276456	zinc finger protein 662 [Source:HGNC Symbol;Acc:HGNC:31930]	ZNF662	7.17392	8.17782	10.711	15.3935	11.5526	11.1813
ENSG00000168398	0.551889	1.76299	4.43086	0.0352948	0.0873782	bradykinin receptor B2 [Source:HGNC Symbol;Acc:HGNC:1030]	BDKRB2	0.541211	2.41348	4.78578	0.87482	2.51301	8.99403
ENSG00000020577	0.551887	7.77458	15.3086	9.12992e-05	0.000645662	sterile alpha motif domain containing 4A [Source:HGNC Symbol;Acc:HGNC:23023]	SAMD4A	163.584	229.604	133.28	225.535	375.396	186.277
ENSG00000075426	0.551536	7.24166	14.7776	0.000120965	0.000817224	FOS like 2, AP-1 transcription factor subunit [Source:HGNC Symbol;Acc:HGNC:3798]	FOSL2	116.234	151.629	98.1275	188.086	225.429	128.404
ENSG00000169955	0.551403	4.14821	11.6191	0.000652776	0.003369	zinc finger protein 747 [Source:HGNC Symbol;Acc:HGNC:28350]	ZNF747	13.1272	16.5604	13.1799	17.7824	26.3685	19.2199
ENSG00000153395	0.550926	3.81155	6.67285	0.00978925	0.0313119	lysophosphatidylcholine acyltransferase 1 [Source:HGNC Symbol;Acc:HGNC:25718]	LPCAT1	11.4575	7.73607	15.5538	14.1401	17.8984	17.2932
ENSG00000179456	0.550665	5.00475	12.4502	0.000417953	0.00231274	zinc finger and BTB domain containing 18 [Source:HGNC Symbol;Acc:HGNC:13030]	ZBTB18	29.0642	22.8419	26.3693	39.88	36.2126	38.1082
ENSG00000138835	0.550514	7.10451	13.1815	0.000282726	0.00166203	regulator of G-protein signaling 3 [Source:HGNC Symbol;Acc:HGNC:9999]	RGS3	93.5949	120.588	117.204	129.961	216.336	147.861
ENSG00000180658	0.550371	-1.20812	2.23263	0.135124	0.247805	olfactory receptor family 2 subfamily A member 4 [Source:HGNC Symbol;Acc:HGNC:14729]	OR2A4	0.264848	0.5064	0.227894	0.361704	0.777405	0.339546
ENSG00000197019	0.550243	3.5473	9.5201	0.00203234	0.0086918	SERTA domain containing 1 [Source:HGNC Symbol;Acc:HGNC:17932]	SERTAD1	8.39453	8.12395	11.879	10.6829	15.0148	15.8797
ENSG00000170390	0.550052	4.80071	7.8145	0.00518287	0.0185932	doublecortin like kinase 2 [Source:HGNC Symbol;Acc:HGNC:19002]	DCLK2	16.6163	30.2332	20.0262	34.4881	45.7042	20.0174
ENSG00000124920	0.550037	3.98053	8.85599	0.00292129	0.0116859	myelin regulatory factor [Source:HGNC Symbol;Acc:HGNC:1181]	MYRF	3.67333	26.0742	11.0149	7.28456	32.0544	14.4821
ENSG00000188234	0.549993	3.02852	9.41135	0.00215647	0.00911323	ArfGAP with GTPase domain, ankyrin repeat and PH domain 4 [Source:HGNC Symbol;Acc:HGNC:23459]	AGAP4	6.89756	5.74279	7.13119	10.6408	8.10852	10.2733
ENSG00000126603	0.549984	3.29618	8.81467	0.00298819	0.0119089	GLIS family zinc finger 2 [Source:HGNC Symbol;Acc:HGNC:29450]	GLIS2	5.44665	10.7421	8.06176	9.4632	12.5018	12.5632
ENSG00000117013	0.549976	1.4473	3.85303	0.0496561	0.114101	potassium voltage-gated channel subfamily Q member 4 [Source:HGNC Symbol;Acc:HGNC:6298]	KCNQ4	2.37212	2.15489	1.89912	3.27216	2.10623	4.39041
ENSG00000139269	0.549913	-1.61572	1.36263	0.243082	0.383479	inhibin beta E subunit [Source:HGNC Symbol;Acc:HGNC:24029]	INHBE	0.138182	0.5064	0.104452	0.100941	0.687009	0.307961
ENSG00000101187	0.549856	4.06214	11.8544	0.000575249	0.00302242	solute carrier organic anion transporter family member 4A1 [Source:HGNC Symbol;Acc:HGNC:10953]	SLCO4A1	21.9593	9.34147	9.40064	31.7795	13.3967	14.2136
ENSG00000125741	0.549624	5.71538	13.2892	0.00026694	0.00159023	OPA3, outer mitochondrial membrane lipid metabolism regulator [Source:HGNC Symbol;Acc:HGNC:8142]	OPA3	46.406	40.081	41.5337	63.6516	63.0693	60.3524
ENSG00000198812	0.54945	5.42552	12.6698	0.000371614	0.00208585	leucine rich repeat containing 10 [Source:HGNC Symbol;Acc:HGNC:20264]	LRRC10	27.6939	16.3664	62.8229	38.0715	27.634	85.0603
ENSG00000175283	0.549016	3.31594	9.93134	0.00162488	0.00722295	dolichol kinase [Source:HGNC Symbol;Acc:HGNC:23406]	DOLK	7.47332	8.78119	7.82437	9.99314	14.2283	11.2998
ENSG00000178896	0.548958	2.90213	8.74061	0.003112	0.0122832	exosome component 4 [Source:HGNC Symbol;Acc:HGNC:18189]	EXOSC4	5.68847	6.75559	5.71635	8.23508	9.61813	8.68607
ENSG00000100056	0.548918	3.63132	11.1835	0.000825266	0.00410201	DiGeorge syndrome critical region gene 14 [Source:HGNC Symbol;Acc:HGNC:16817]	DGCR14	10.9624	8.95358	10.2552	14.3084	14.2374	15.477
ENSG00000011347	0.548706	3.94836	10.2221	0.00138771	0.00631047	synaptotagmin 7 [Source:HGNC Symbol;Acc:HGNC:11514]	SYT7	13.8297	10.893	12.3918	24.3856	15.0148	15.9508
ENSG00000135722	0.548441	1.85136	4.97283	0.0257485	0.0678236	F-box and leucine rich repeat protein 8 [Source:HGNC Symbol;Acc:HGNC:17875]	FBXL8	3.93817	2.20877	2.70625	4.18904	3.71527	4.74575
ENSG00000116717	0.548429	4.86654	11.5512	0.000677065	0.00347273	growth arrest and DNA damage inducible alpha [Source:HGNC Symbol;Acc:HGNC:4095]	GADD45A	21.3836	27.3995	21.3651	29.256	47.0601	28.4271
ENSG00000196378	0.548149	2.09022	6.2767	0.0122336	0.0376643	zinc finger protein 34 [Source:HGNC Symbol;Acc:HGNC:13098]	ZNF34	3.3509	3.29699	3.6653	5.24892	4.85426	4.97475
ENSG00000125648	0.548073	5.93816	13.6379	0.000221659	0.00136777	solute carrier family 25 member 23 [Source:HGNC Symbol;Acc:HGNC:19375]	SLC25A23	47.5229	61.5545	40.2044	75.0747	87.2863	56.1041
ENSG00000196159	0.547936	7.05306	14.6556	0.000129053	0.000863856	FAT atypical cadherin 4 [Source:HGNC Symbol;Acc:HGNC:23109]	FAT4	97.9361	126.46	97.3869	139.18	200.824	134.839
ENSG00000140522	0.547907	-2.43528	1.25109	0.263344	0.406168	retinaldehyde binding protein 1 [Source:HGNC Symbol;Acc:HGNC:10024]	RLBP1	0.138182	0.172392	0.094956	0.176646	0.21695	0.189514
ENSG00000075035	0.5474	-3.68406	0.580417	0.446149	0.591752	WSC domain containing 2 [Source:HGNC Symbol;Acc:HGNC:29117]	WSCD2	0.0115151	0.0646468	0.0664692	0.0336469	0.108475	0.0631714
ENSG00000113205	0.547364	1.79556	5.53663	0.0186224	0.0526876	protocadherin beta 3 [Source:HGNC Symbol;Acc:HGNC:8688]	PCDHB3	2.18787	2.67207	3.4469	2.70858	4.43844	5.20375
ENSG00000125352	0.547188	2.29097	6.00312	0.0142806	0.0427351	ring finger protein 113A [Source:HGNC Symbol;Acc:HGNC:12974]	RNF113A	4.15696	3.43706	4.21605	4.78627	5.56839	7.03572
ENSG00000234127	0.54692	4.67717	12.3352	0.000444501	0.00243087	tripartite motif containing 26 [Source:HGNC Symbol;Acc:HGNC:12962]	TRIM26	18.0097	24.1348	20.2446	26.1773	33.329	31.4515
ENSG00000188523	0.546721	-0.0185683	3.56458	0.0590245	0.130717	cilia and flagella associated protein 77 [Source:HGNC Symbol;Acc:HGNC:33776]	CFAP77	0.89818	0.668017	0.750152	1.53093	0.813564	1.1134
ENSG00000111321	0.546501	4.06001	10.5775	0.00114471	0.00536373	lymphotoxin beta receptor [Source:HGNC Symbol;Acc:HGNC:6718]	LTBR	9.48846	16.6789	13.987	12.1381	23.3674	24.2499
ENSG00000198929	0.546336	1.92846	5.41031	0.0200182	0.055751	nitric oxide synthase 1 adaptor protein [Source:HGNC Symbol;Acc:HGNC:16859]	NOS1AP	2.53333	4.01888	2.77271	4.28157	4.62827	4.45359
ENSG00000102858	0.546261	4.67162	8.96322	0.00275468	0.0111249	mahogunin ring finger 1 [Source:HGNC Symbol;Acc:HGNC:20254]	MGRN1	25.4599	17.153	18.412	37.693	18.8204	35.2102
ENSG00000105321	0.546124	3.97802	10.9021	0.000960528	0.00464888	coiled-coil domain containing 9 [Source:HGNC Symbol;Acc:HGNC:24560]	CCDC9	11.7339	12.9078	13.5312	15.7888	18.025	22.3943
ENSG00000257921	0.545734	-1.7876	1.45858	0.227155	0.364756			0.207272	0.107745	0.360833	0.328057	0.262148	0.33165
ENSG00000127419	0.545722	3.6461	8.71309	0.00315934	0.0124404	transmembrane protein 175 [Source:HGNC Symbol;Acc:HGNC:28709]	TMEM175	10.26	8.22092	11.1573	15.7215	8.98536	20.586
ENSG00000097007	0.545209	5.99332	13.5068	0.000237705	0.00145058	ABL proto-oncogene 1, non-receptor tyrosine kinase [Source:HGNC Symbol;Acc:HGNC:76]	ABL1	44.9551	54.5404	56.157	72.4923	72.5428	81.3727
ENSG00000214402	0.545072	3.04072	7.47145	0.00626852	0.0217149	lipocalin like 1 [Source:HGNC Symbol;Acc:HGNC:34436]	LCNL1	8.59028	1.95018	10.4167	10.3801	3.84183	14.0083
ENSG00000075240	0.545052	5.85762	13.4959	0.000239079	0.00145786	GRAM domain containing 4 [Source:HGNC Symbol;Acc:HGNC:29113]	GRAMD4	47.6035	41.3201	52.7101	65.8218	64.9676	75.324
ENSG00000038532	0.545017	5.72658	12.8906	0.000330239	0.00188666	C-type lectin domain family 16 member A [Source:HGNC Symbol;Acc:HGNC:29013]	CLEC16A	43.2969	46.6104	38.875	70.0781	66.0342	52.6613
ENSG00000198855	0.544854	2.61439	7.71877	0.00546497	0.0194268	FIC domain containing [Source:HGNC Symbol;Acc:HGNC:18416]	FICD	4.01878	5.80744	5.07065	5.91345	8.09044	7.68323
ENSG00000186280	0.543716	0.458296	4.08012	0.0433905	0.102496	lysine demethylase 4D [Source:HGNC Symbol;Acc:HGNC:25498]	KDM4D	1.09394	0.991251	1.18695	1.7244	1.2565	1.83197
ENSG00000151612	0.543698	4.94972	10.1104	0.00147432	0.00664035	zinc finger protein 827 [Source:HGNC Symbol;Acc:HGNC:27193]	ZNF827	21.7751	31.7093	22.3147	40.1997	37.9573	31.3172
ENSG00000116991	0.543693	7.77144	15.5127	8.19513e-05	0.000589438	signal induced proliferation associated 1 like 2 [Source:HGNC Symbol;Acc:HGNC:23800]	SIPA1L2	169.837	208.184	153.762	249.408	315.871	213.748
ENSG00000125731	0.543643	0.836256	3.71268	0.0540005	0.121984	SH2 domain containing 3A [Source:HGNC Symbol;Acc:HGNC:16885]	SH2D3A	1.35878	2.17644	0.911577	1.96834	2.23278	1.93463
ENSG00000143409	0.543439	4.75233	12.544	0.000397482	0.00221399	MINDY lysine 48 deubiquitinase 1 [Source:HGNC Symbol;Acc:HGNC:25648]	MINDY1	24.5733	18.4998	22.742	35.8592	28.0499	31.8305
ENSG00000204301	0.543339	6.36387	13.7663	0.00020702	0.00129085	notch 4 [Source:HGNC Symbol;Acc:HGNC:7884]	NOTCH4	83.2428	54.0232	60.7908	135.791	66.4139	93.7385
[truncated: 14,027 more rows]

## Sheet: DCM enriched
ENSG00000258643
ENSG00000169894
ENSG00000102539
ENSG00000238227
ENSG00000118160
ENSG00000179242
ENSG00000251692
ENSG00000153093
ENSG00000167178
ENSG00000271698
ENSG00000204978
ENSG00000053108
ENSG00000004776
ENSG00000175294
ENSG00000185156
ENSG00000117407
ENSG00000278299
ENSG00000143473
ENSG00000261221
ENSG00000178974
ENSG00000179796
ENSG00000181027
ENSG00000181408
ENSG00000182108
ENSG00000203618
ENSG00000187902
ENSG00000261611
ENSG00000156097
ENSG00000183153
ENSG00000183208
ENSG00000160685
ENSG00000164061
ENSG00000026559
ENSG00000167971
ENSG00000076826
ENSG00000257529
ENSG00000167525
ENSG00000149654
ENSG00000187726
ENSG00000204060
ENSG00000186687
ENSG00000266076
ENSG00000239389
ENSG00000179673
ENSG00000185652
ENSG00000175946
ENSG00000178913
ENSG00000177464
ENSG00000131398
ENSG00000162975
ENSG00000069696
ENSG00000103241
ENSG00000126243
ENSG00000165204
ENSG00000137273
ENSG00000180815
ENSG00000186174
ENSG00000100156
ENSG00000126705
ENSG00000215915
ENSG00000081277
ENSG00000175707
ENSG00000188086
ENSG00000173662
ENSG00000136274
ENSG00000139718
ENSG00000181392
ENSG00000109610
ENSG00000174807
ENSG00000085644
ENSG00000204882
ENSG00000115596
ENSG00000132819
ENSG00000244020
ENSG00000126464
ENSG00000130940
ENSG00000185453
ENSG00000108557
ENSG00000116254
ENSG00000177354
ENSG00000198763
ENSG00000146670
ENSG00000261582
ENSG00000185985
ENSG00000126500
ENSG00000085185
ENSG00000272896
ENSG00000108219
ENSG00000126461
ENSG00000258674
ENSG00000024422
ENSG00000276043
ENSG00000183779
ENSG00000146216
ENSG00000138622
ENSG00000101222
ENSG00000100014
ENSG00000157933
ENSG00000140279
ENSG00000141837
ENSG00000166090
ENSG00000119457
ENSG00000259916
ENSG00000113430
ENSG00000147536
ENSG00000185684
ENSG00000166317
ENSG00000234438
ENSG00000204175
ENSG00000127580
ENSG00000100197
ENSG00000255192
ENSG00000186111
ENSG00000186326
ENSG00000261150
ENSG00000105737
ENSG00000204519
ENSG00000181143
ENSG00000065989
ENSG00000184545
ENSG00000198886
ENSG00000196169
ENSG00000167657
ENSG00000253958
ENSG00000186907
ENSG00000087258
ENSG00000071051
ENSG00000080603
ENSG00000198786
ENSG00000167103
ENSG00000256762
ENSG00000153976
ENSG00000182379
ENSG00000111676
ENSG00000149639
ENSG00000142611
ENSG00000120055
ENSG00000146950
ENSG00000188779
ENSG00000163794
ENSG00000165655
ENSG00000225968
ENSG00000196453
ENSG00000167548
ENSG00000143126
ENSG00000103264
ENSG00000169783
ENSG00000145002
ENSG00000274791
ENSG00000178209
ENSG00000213937
ENSG00000225556
ENSG00000141905
ENSG00000198899
ENSG00000203883
ENSG00000080845
ENSG00000212864
ENSG00000183638
ENSG00000225614
ENSG00000140323
ENSG00000168334
ENSG00000101276
ENSG00000089250
ENSG00000182095
ENSG00000144711
ENSG00000100302
ENSG00000167182
ENSG00000188322
ENSG00000235387
ENSG00000182795
ENSG00000198894
ENSG00000234857
ENSG00000197616
ENSG00000113073
ENSG00000188199
ENSG00000214491
ENSG00000129993
ENSG00000176845
ENSG00000099769
ENSG00000212907
ENSG00000168135
ENSG00000198324
ENSG00000130522
ENSG00000196498
ENSG00000176945
ENSG00000063169
ENSG00000139438
ENSG00000266074
ENSG00000099381
ENSG00000182195
ENSG00000274944
ENSG00000167173
ENSG00000203499
ENSG00000204388
ENSG00000173065
ENSG00000177602
ENSG00000184574
ENSG00000171368
ENSG00000117983
ENSG00000166484
ENSG00000156453
ENSG00000170561
ENSG00000162951
ENSG00000239732
ENSG00000125872
ENSG00000135083
ENSG00000160216
ENSG00000235106
ENSG00000157734
ENSG00000173546
ENSG00000178404
ENSG00000145113
ENSG00000136574
ENSG00000100276
ENSG00000106012
ENSG00000145506
ENSG00000186047
ENSG00000117713
ENSG00000196557
ENSG00000167978
ENSG00000127666
ENSG00000100336
ENSG00000254706
ENSG00000183246
ENSG00000127585
ENSG00000162881
ENSG00000177706
ENSG00000171813
ENSG00000205209
ENSG00000168140
ENSG00000182103
ENSG00000099814
ENSG00000137507
ENSG00000196136
ENSG00000140557
ENSG00000144681
ENSG00000172534
ENSG00000175591
ENSG00000134323
ENSG00000206549
ENSG00000175164
ENSG00000177732
ENSG00000135736
ENSG00000178772
ENSG00000130962
ENSG00000178951
ENSG00000132846
ENSG00000113749
ENSG00000116731
ENSG00000138162
ENSG00000156427
ENSG00000121068
ENSG00000076067
ENSG00000141582
ENSG00000173209
ENSG00000125378
ENSG00000126895
ENSG00000078808
ENSG00000056487
ENSG00000221869
ENSG00000198169
ENSG00000275793
ENSG00000275342
ENSG00000079432
ENSG00000175229
ENSG00000147799
ENSG00000068650
ENSG00000165238
ENSG00000260325
ENSG00000243444
ENSG00000137878
ENSG00000169105
ENSG00000213024
ENSG00000104081
ENSG00000137337
ENSG00000172458
ENSG00000277150
ENSG00000089847
ENSG00000132938
ENSG00000188549
ENSG00000160298
ENSG00000187513
ENSG00000104967
ENSG00000176371
ENSG00000162104
ENSG00000140067
ENSG00000277400
ENSG00000179431
ENSG00000108551
ENSG00000167395
ENSG00000115568
ENSG00000179981
ENSG00000127578
ENSG00000185112
ENSG00000177606
ENSG00000137166
ENSG00000119242
ENSG00000272333
ENSG00000154358
ENSG00000008056
ENSG00000075461
ENSG00000179772
ENSG00000171574
ENSG00000277363
ENSG00000126003
ENSG00000164638
ENSG00000167676
ENSG00000080854
ENSG00000089225
ENSG00000260300
ENSG00000122547
ENSG00000181666
ENSG00000183114
ENSG00000181638
ENSG00000179588
ENSG00000085872
ENSG00000105357
ENSG00000175894
ENSG00000158186
ENSG00000196422
ENSG00000145217
ENSG00000186472
ENSG00000005339
ENSG00000107954
ENSG00000165714
ENSG00000183072
ENSG00000185551
ENSG00000180929
ENSG00000069188
ENSG00000130762
ENSG00000132702
ENSG00000175745
ENSG00000260097
ENSG00000167880
ENSG00000130749
ENSG00000108175
ENSG00000166592
ENSG00000132821
ENSG00000169184
ENSG00000148795
ENSG00000185028
ENSG00000132854
ENSG00000125434
ENSG00000170214
ENSG00000197497
ENSG00000258986
ENSG00000188827
ENSG00000181588
ENSG00000137843
ENSG00000133401
ENSG00000125878
ENSG00000123989
ENSG00000165376
ENSG00000116396
ENSG00000177051
ENSG00000178252
ENSG00000159871
ENSG00000109956
ENSG00000041988
ENSG00000149679
ENSG00000176692
ENSG00000061337
ENSG00000130700
ENSG00000219438
ENSG00000155034
ENSG00000136630
ENSG00000188112
ENSG00000008735
ENSG00000173080
ENSG00000128011
ENSG00000101654
ENSG00000178093
ENSG00000136383
ENSG00000090924
ENSG00000177875
ENSG00000249459
ENSG00000160993
ENSG00000104885
ENSG00000065526
ENSG00000119227
ENSG00000225190
ENSG00000172216
ENSG00000140691
ENSG00000070047
ENSG00000128298
ENSG00000116133
ENSG00000162426
ENSG00000105732
ENSG00000160460
ENSG00000043591
ENSG00000218891
ENSG00000079313
ENSG00000110047
ENSG00000163820
ENSG00000135604
ENSG00000060069
ENSG00000130222
ENSG00000164736
ENSG00000136206
ENSG00000197915
ENSG00000185924
ENSG00000132613
ENSG00000160113
ENSG00000153443
ENSG00000260428
ENSG00000186603
ENSG00000188385
ENSG00000196365
ENSG00000184524
ENSG00000130311
ENSG00000142627
ENSG00000130518
ENSG00000157570
ENSG00000114853
ENSG00000169258
ENSG00000253910
ENSG00000273820
ENSG00000135540
ENSG00000183837
ENSG00000198754
ENSG00000172828
ENSG00000173621
ENSG00000130300
ENSG00000054598
ENSG00000109501
ENSG00000180921
ENSG00000100139
ENSG00000275832
ENSG00000170092
ENSG00000107147
ENSG00000166349
ENSG00000124782
ENSG00000127452
ENSG00000070182
ENSG00000110237
ENSG00000013619
ENSG00000147119
ENSG00000150510
ENSG00000262209
ENSG00000081059
ENSG00000161328
ENSG00000107338
ENSG00000100335
ENSG00000128487
ENSG00000186193
ENSG00000171823
ENSG00000198844
ENSG00000111249
ENSG00000119669
ENSG00000168502
ENSG00000171119
ENSG00000163531
ENSG00000134780
ENSG00000166833
ENSG00000090316
ENSG00000113196
ENSG00000132436
ENSG00000197976
ENSG00000160999
ENSG00000141564
ENSG00000008710
ENSG00000164976
ENSG00000100393
ENSG00000105738
ENSG00000173093
ENSG00000162337
ENSG00000137860
ENSG00000176723
ENSG00000169951
ENSG00000143858
ENSG00000177710
ENSG00000197467
ENSG00000167491
ENSG00000175264
ENSG00000116128
ENSG00000179603
ENSG00000159905
ENSG00000176108
ENSG00000253953
ENSG00000183580
ENSG00000118898
ENSG00000012232
ENSG00000132003
ENSG00000105647
ENSG00000161509
ENSG00000242419
ENSG00000132510
ENSG00000140406
ENSG00000154783
ENSG00000198482
ENSG00000166963
ENSG00000175048
ENSG00000251322
ENSG00000172985
ENSG00000100036
ENSG00000148400
ENSG00000198824
ENSG00000130589
ENSG00000181350
ENSG00000188859
ENSG00000109927
ENSG00000008853
ENSG00000164056
ENSG00000142459
ENSG00000186523
ENSG00000072195
ENSG00000236609
ENSG00000074047
ENSG00000171861
ENSG00000184160
ENSG00000128596
ENSG00000267221
ENSG00000163866
ENSG00000198680
ENSG00000140836
ENSG00000277203
ENSG00000164236
ENSG00000167625
ENSG00000114867
ENSG00000197119
ENSG00000128016
ENSG00000169181
ENSG00000183908
ENSG00000198435
ENSG00000254206
ENSG00000009950
ENSG00000130803
ENSG00000176022
ENSG00000280987
ENSG00000196843
ENSG00000197362
ENSG00000172508
ENSG00000181409
ENSG00000166188
ENSG00000083812
ENSG00000185022
ENSG00000181585
ENSG00000204131
ENSG00000198727
ENSG00000173548
ENSG00000148841
ENSG00000173456
ENSG00000120949
ENSG00000160233
ENSG00000176155
ENSG00000119737
ENSG00000166813
ENSG00000185338
ENSG00000140961
ENSG00000100311
ENSG00000224051
ENSG00000141933
ENSG00000162105
ENSG00000162849
ENSG00000185915
ENSG00000099822
ENSG00000167487
ENSG00000135956
ENSG00000130055
ENSG00000105298
ENSG00000188483
ENSG00000185950
ENSG00000099625
ENSG00000173269
ENSG00000150594
ENSG00000185340
ENSG00000162009
ENSG00000174672
ENSG00000178860
ENSG00000198646
ENSG00000136802
ENSG00000183044
ENSG00000127528
ENSG00000176715
ENSG00000079308
ENSG00000172650
ENSG00000240764
ENSG00000143257
ENSG00000239887
ENSG00000124164
ENSG00000124194
ENSG00000145934
ENSG00000237172
ENSG00000175467
ENSG00000243156
ENSG00000120738
ENSG00000142599
ENSG00000050767
ENSG00000116786
ENSG00000109906
ENSG00000178764
ENSG00000072071
ENSG00000134369
ENSG00000170604
ENSG00000110400
ENSG00000177303
ENSG00000091527
ENSG00000174945
ENSG00000177103
ENSG00000241978
ENSG00000143878
ENSG00000175602
ENSG00000036672
ENSG00000178385
ENSG00000164591
ENSG00000135547
ENSG00000126062
ENSG00000214562
ENSG00000122367
ENSG00000171056
ENSG00000112033
ENSG00000169992
ENSG00000158480
ENSG00000173338
ENSG00000179348
ENSG00000158246
ENSG00000168077
ENSG00000198853
ENSG00000168386
ENSG00000151746
ENSG00000170577
ENSG00000253485
ENSG00000169083
ENSG00000183655
ENSG00000167394
ENSG00000250091
ENSG00000131196
ENSG00000158445
ENSG00000106665
ENSG00000179776
ENSG00000181830
ENSG00000081853
ENSG00000049618
ENSG00000183801
ENSG00000184956
ENSG00000130202
ENSG00000275183
ENSG00000130723
ENSG00000151929
ENSG00000164393
ENSG00000076356
ENSG00000165821
ENSG00000116871
ENSG00000171223
ENSG00000143842
ENSG00000071655
ENSG00000203942
ENSG00000198467
ENSG00000168286
ENSG00000185585
ENSG00000205138
ENSG00000090565
ENSG00000134917
ENSG00000151208
ENSG00000167674
ENSG00000198720
ENSG00000074211
ENSG00000171357
ENSG00000169047
ENSG00000197653
ENSG00000187486
ENSG00000183647
ENSG00000136848
ENSG00000128245
ENSG00000148840
ENSG00000142235
ENSG00000265690
ENSG00000055813
ENSG00000172935
ENSG00000092054
ENSG00000166341
ENSG00000173898
ENSG00000109089
ENSG00000176125
ENSG00000168792
ENSG00000145945
ENSG00000125851
ENSG00000095539
ENSG00000047849
ENSG00000205903
ENSG00000143507
ENSG00000127124
ENSG00000188486
ENSG00000171847
ENSG00000135439
ENSG00000196872
ENSG00000178342
ENSG00000143850
ENSG00000228253
ENSG00000177873
ENSG00000136213
ENSG00000111181
ENSG00000168490
ENSG00000187642
ENSG00000196456
ENSG00000113262
ENSG00000179862
ENSG00000177272
ENSG00000137825
ENSG00000204922
ENSG00000090975
ENSG00000254221
ENSG00000080709
ENSG00000196724
ENSG00000258429
ENSG00000115107
ENSG00000259316
ENSG00000099974
ENSG00000184838
ENSG00000259956
ENSG00000179041
ENSG00000198113
ENSG00000127903
ENSG00000248643
ENSG00000175040
ENSG00000167670
ENSG00000176842
ENSG00000137834
ENSG00000198695
ENSG00000163083
ENSG00000162413
ENSG00000149527
ENSG00000254122
ENSG00000183337
ENSG00000276045
ENSG00000100154
ENSG00000084731
ENSG00000075275
ENSG00000137497
ENSG00000171169
ENSG00000197077
ENSG00000141448
ENSG00000096070
ENSG00000270170
ENSG00000157782
ENSG00000148396
ENSG00000119703
ENSG00000179912
ENSG00000127616
ENSG00000196358
ENSG00000167680
ENSG00000159733
ENSG00000131759
ENSG00000179270
ENSG00000120451
ENSG00000100024
ENSG00000168061
ENSG00000197136
ENSG00000176788
ENSG00000160299
ENSG00000144647
ENSG00000269693
ENSG00000179627
ENSG00000188021
ENSG00000168993
ENSG00000066735
ENSG00000196544
ENSG00000136720
ENSG00000104142
ENSG00000198752
ENSG00000101298
ENSG00000011451
ENSG00000100413
ENSG00000266524
ENSG00000181817
ENSG00000149300
ENSG00000155666
ENSG00000122188
ENSG00000164916
ENSG00000175093
ENSG00000148143
ENSG00000178826
ENSG00000129749
ENSG00000063587
ENSG00000130758
ENSG00000196535
ENSG00000156381
ENSG00000152822
ENSG00000147650
ENSG00000257923
ENSG00000167470
ENSG00000276289
ENSG00000175931
ENSG00000185019
ENSG00000215218
ENSG00000078725
ENSG00000177853
ENSG00000115274
ENSG00000171522
ENSG00000221995
ENSG00000136859
ENSG00000177352
ENSG00000109066
ENSG00000204366
ENSG00000183134
ENSG00000136367
ENSG00000128917
ENSG00000143319
ENSG00000106991
ENSG00000186222
ENSG00000177508
ENSG00000184939
ENSG00000020256
ENSG00000076984
ENSG00000160223
ENSG00000122778
ENSG00000110987
ENSG00000215910
ENSG00000055118
ENSG00000162783
ENSG00000008441
ENSG00000204237
ENSG00000155506
ENSG00000133316
ENSG00000184371
ENSG00000185274
ENSG00000125459
ENSG00000099331
ENSG00000177191
ENSG00000163704
ENSG00000133985
ENSG00000174276
ENSG00000103150
ENSG00000149503
ENSG00000101463
ENSG00000176087
ENSG00000230797
ENSG00000119866
ENSG00000182177
ENSG00000203485
ENSG00000179886
ENSG00000148426
ENSG00000114654
ENSG00000182162
ENSG00000256223
ENSG00000157637
ENSG00000162913
ENSG00000188026
ENSG00000196663
ENSG00000026036
ENSG00000068354
ENSG00000205336
ENSG00000164086
ENSG00000139266
ENSG00000019144
ENSG00000087903
ENSG00000156983
ENSG00000183798
ENSG00000130699
ENSG00000140564
ENSG00000160959
ENSG00000132024
ENSG00000131409
ENSG00000078814
ENSG00000143294
ENSG00000204682
ENSG00000078687
ENSG00000171798
ENSG00000141431
ENSG00000119596
ENSG00000259417
ENSG00000007314
ENSG00000197283
ENSG00000185864
ENSG00000243477
ENSG00000177045
ENSG00000213199
ENSG00000130035
ENSG00000204172
ENSG00000104957
ENSG00000175564
ENSG00000136378
ENSG00000158169
ENSG00000168612
ENSG00000082641
ENSG00000085741
ENSG00000177374
ENSG00000133275
ENSG00000234719
ENSG00000149798
ENSG00000183495
ENSG00000177311
ENSG00000173376
ENSG00000125651
ENSG00000119574
ENSG00000204956
ENSG00000187583
ENSG00000267508
ENSG00000149016
ENSG00000164715
ENSG00000125834
ENSG00000166716
ENSG00000165684
ENSG00000140443
ENSG00000112320
ENSG00000170468
ENSG00000107554
ENSG00000127399
ENSG00000110583
ENSG00000169962
ENSG00000176490
ENSG00000120784
ENSG00000064393
ENSG00000103056
ENSG00000115705
ENSG00000184923
ENSG00000137413
ENSG00000134259
ENSG00000181444
ENSG00000181619
ENSG00000166091
ENSG00000119729
ENSG00000133069
ENSG00000129116
ENSG00000114812
ENSG00000022567
ENSG00000101638
ENSG00000130653
ENSG00000177283
ENSG00000169515
ENSG00000122877
ENSG00000005513
ENSG00000070731
ENSG00000180447
ENSG00000109118
ENSG00000102935
ENSG00000101126
ENSG00000113504
ENSG00000179403
ENSG00000141965
ENSG00000198369
ENSG00000138834
ENSG00000162738
ENSG00000122574
ENSG00000105325
ENSG00000095637
ENSG00000049239
ENSG00000168763
ENSG00000220008
ENSG00000120907
ENSG00000166133
ENSG00000203867
ENSG00000170265
ENSG00000173334
ENSG00000173175
ENSG00000136002
ENSG00000156030
ENSG00000101181
ENSG00000185262
ENSG00000196739
ENSG00000128266
ENSG00000141696
ENSG00000138172
ENSG00000187792
ENSG00000126803
ENSG00000151617
ENSG00000166189
ENSG00000088367
ENSG00000116690
ENSG00000034053
ENSG00000005007
ENSG00000184261
ENSG00000119715
ENSG00000139722
ENSG00000134030
ENSG00000179922
ENSG00000116044
ENSG00000083844
ENSG00000257704
ENSG00000112137
ENSG00000178175
ENSG00000008300
ENSG00000163909
ENSG00000184792
ENSG00000262576
ENSG00000186197
ENSG00000178307
ENSG00000130943
ENSG00000139044
ENSG00000116525
ENSG00000198492
ENSG00000138080
ENSG00000065320
ENSG00000114554
ENSG00000198064
ENSG00000112624
ENSG00000187189
ENSG00000144230
ENSG00000158008
ENSG00000162458
ENSG00000182253
ENSG00000167566
ENSG00000142444
ENSG00000107815
ENSG00000169564
ENSG00000015676
ENSG00000188803
ENSG00000165810
ENSG00000119771
ENSG00000160801
ENSG00000205502
ENSG00000070366
ENSG00000185669
ENSG00000101191
ENSG00000197361
ENSG00000198835
ENSG00000103126
ENSG00000090020
ENSG00000130147
ENSG00000167363
ENSG00000254470
ENSG00000050820
ENSG00000198569
ENSG00000167210
ENSG00000058453
ENSG00000108819
ENSG00000124440
ENSG00000157240
ENSG00000122863
ENSG00000105953
ENSG00000141867
ENSG00000100425
ENSG00000219607
ENSG00000176435
ENSG00000125398
ENSG00000088986
ENSG00000169957
ENSG00000135709
ENSG00000072134
ENSG00000254995
ENSG00000152217
ENSG00000043143
ENSG00000137877
ENSG00000100412
ENSG00000099949
ENSG00000130037
ENSG00000114631
ENSG00000187954
ENSG00000102870
ENSG00000165757
ENSG00000067840
ENSG00000119714
ENSG00000197608
ENSG00000134461
ENSG00000163815
ENSG00000016391
ENSG00000178927
ENSG00000261934
ENSG00000198863
ENSG00000213694
ENSG00000169252
ENSG00000095739
ENSG00000171604
ENSG00000170412
ENSG00000183092
ENSG00000185105
ENSG00000171992
ENSG00000167461
ENSG00000178623
ENSG00000132205
ENSG00000197256
ENSG00000163125
ENSG00000183621
ENSG00000162775
ENSG00000245680
ENSG00000169490
ENSG00000185761
ENSG00000136715
ENSG00000128271
ENSG00000169221
ENSG00000127220
ENSG00000082684
ENSG00000133454
ENSG00000196972
ENSG00000150457
ENSG00000070614
ENSG00000100628
ENSG00000124496
ENSG00000140543
ENSG00000176903
ENSG00000163945
ENSG00000173110
ENSG00000114378
ENSG00000138316
ENSG00000033100
ENSG00000131149
ENSG00000101331
ENSG00000144712
ENSG00000086015
ENSG00000165617
ENSG00000214717
ENSG00000148296
ENSG00000131591
ENSG00000059122
ENSG00000140320
ENSG00000150455
ENSG00000185220
ENSG00000125503
ENSG00000183864
ENSG00000170954
ENSG00000184313
ENSG00000226479
ENSG00000189114
ENSG00000146834
ENSG00000106571
ENSG00000177614
ENSG00000171302
ENSG00000146067
ENSG00000176678
ENSG00000141577
ENSG00000188707
ENSG00000168427
ENSG00000197162
ENSG00000186376
ENSG00000176920
ENSG00000141068
ENSG00000187678
ENSG00000125901
ENSG00000135111
ENSG00000228672
ENSG00000173868
ENSG00000116685
ENSG00000113555
ENSG00000138347
ENSG00000176182
ENSG00000149596
ENSG00000179361
ENSG00000179604
ENSG00000076201
ENSG00000205710
ENSG00000185800
ENSG00000170921
ENSG00000182957
ENSG00000165886
ENSG00000058404
ENSG00000115526
ENSG00000172765
ENSG00000160007
ENSG00000049283
ENSG00000174951
ENSG00000228594
ENSG00000074855
ENSG00000105618
ENSG00000136114
ENSG00000262304
ENSG00000073803
ENSG00000128591
ENSG00000254245
ENSG00000105538
ENSG00000184436
ENSG00000172336
ENSG00000163956
ENSG00000100926
ENSG00000160439
ENSG00000088808
ENSG00000232838
ENSG00000135835
ENSG00000099326
ENSG00000253305
ENSG00000153714
ENSG00000124839
ENSG00000006062
ENSG00000010818
ENSG00000101407
ENSG00000162522
ENSG00000212747
ENSG00000096433
ENSG00000170382
ENSG00000047578
ENSG00000143337
ENSG00000147324
ENSG00000131323
ENSG00000134815
ENSG00000070601
ENSG00000140577
ENSG00000015532
ENSG00000161914
ENSG00000058668
ENSG00000169918
ENSG00000180834
ENSG00000204469
ENSG00000188582
ENSG00000163126
ENSG00000187720
ENSG00000117298
ENSG00000107736
ENSG00000166289
ENSG00000124257
ENSG00000168874
ENSG00000014164
ENSG00000182318
ENSG00000188997
ENSG00000100324
ENSG00000262919
ENSG00000196391
ENSG00000175505
ENSG00000198719
ENSG00000001167
ENSG00000253537
ENSG00000105127
ENSG00000183718
ENSG00000147912
ENSG00000242732
ENSG00000167716
ENSG00000169155
ENSG00000186994
ENSG00000181754
ENSG00000232593
ENSG00000114841
ENSG00000187624
ENSG00000275778
ENSG00000143195
ENSG00000126368
ENSG00000124507
ENSG00000176410
ENSG00000166987
ENSG00000089199
ENSG00000100106
ENSG00000103227
ENSG00000215421
ENSG00000165716
ENSG00000106608
ENSG00000106346
ENSG00000148926
ENSG00000166507
ENSG00000031081
ENSG00000106479
ENSG00000177946
ENSG00000141639
ENSG00000100426
ENSG00000162073
ENSG00000185504
ENSG00000177469
ENSG00000184271
ENSG00000156304
ENSG00000021300
ENSG00000132622
ENSG00000126882
ENSG00000172403
ENSG00000173706
ENSG00000124006
ENSG00000253159
ENSG00000125845
ENSG00000138771
ENSG00000103199
ENSG00000100605
ENSG00000129933
ENSG00000187715
ENSG00000148331
ENSG00000189420
ENSG00000172081
ENSG00000160785
ENSG00000169635
ENSG00000100105
ENSG00000139613
ENSG00000175727
ENSG00000135144
ENSG00000173327
ENSG00000130528
ENSG00000235173
ENSG00000141524
ENSG00000104524
ENSG00000095370
ENSG00000175414
ENSG00000198885
ENSG00000060491
ENSG00000167994
ENSG00000134107
ENSG00000184887
ENSG00000196428
ENSG00000197530
ENSG00000171467
ENSG00000136854
ENSG00000167595
ENSG00000213918
ENSG00000079435
ENSG00000197479
ENSG00000176396
ENSG00000140104
ENSG00000117481
ENSG00000124217
ENSG00000183496
ENSG00000197024
ENSG00000171533
ENSG00000142156
ENSG00000158805
ENSG00000134247
ENSG00000169851
ENSG00000171853
ENSG00000100345
ENSG00000213398
ENSG00000169925
ENSG00000107872
ENSG00000158321
ENSG00000140006
ENSG00000004660
ENSG00000153902
ENSG00000177192
ENSG00000198053
ENSG00000196576
ENSG00000181722
ENSG00000130054
ENSG00000184619
ENSG00000099864
ENSG00000129932
ENSG00000166762
ENSG00000178096
ENSG00000006194
ENSG00000162650
ENSG00000180304
ENSG00000107140
ENSG00000146859
ENSG00000158042
ENSG00000182667
ENSG00000232434
ENSG00000128268
ENSG00000255690
ENSG00000143740
ENSG00000140743
ENSG00000182606
ENSG00000142173
ENSG00000090776
ENSG00000126785
ENSG00000150967
ENSG00000131831
ENSG00000100038
ENSG00000182810
ENSG00000187372
ENSG00000163485
ENSG00000166831
ENSG00000213859
ENSG00000157927
ENSG00000180340
ENSG00000160789
ENSG00000140829
ENSG00000072110
ENSG00000180357
ENSG00000072832
ENSG00000197122
ENSG00000277117
ENSG00000133065
ENSG00000198934
ENSG00000188522
ENSG00000186868
ENSG00000275111
ENSG00000103647
ENSG00000102178
ENSG00000157613
ENSG00000161847
ENSG00000159842
ENSG00000171385
ENSG00000171621
ENSG00000276547
ENSG00000126218
ENSG00000147113
ENSG00000134571
ENSG00000088320
ENSG00000147883
ENSG00000182870
ENSG00000205189
ENSG00000253846
ENSG00000175662
ENSG00000070413
ENSG00000106236
ENSG00000260691
ENSG00000196782
ENSG00000151135
ENSG00000158158
ENSG00000099889
ENSG00000197114
ENSG00000186951
ENSG00000163431
ENSG00000169375
ENSG00000168795
ENSG00000214140
ENSG00000166106
ENSG00000121361
ENSG00000160953
ENSG00000127511
ENSG00000160097
ENSG00000037280
ENSG00000063176
ENSG00000106077
ENSG00000133392
ENSG00000198585
ENSG00000065054
ENSG00000138942
ENSG00000204851
ENSG00000013016
ENSG00000111664
ENSG00000160703
ENSG00000152518
ENSG00000221890
ENSG00000132361
ENSG00000162391
ENSG00000129646
ENSG00000163900
ENSG00000136807
ENSG00000204149
ENSG00000118046
ENSG00000171456
ENSG00000120322
ENSG00000078699
ENSG00000095383
ENSG00000083838
ENSG00000169057
ENSG00000107882
ENSG00000204390
ENSG00000205683
ENSG00000205978
ENSG00000159387
ENSG00000156860
ENSG00000204576
ENSG00000181220
ENSG00000197245
ENSG00000258461
ENSG00000122783
ENSG00000102984
ENSG00000204256
ENSG00000198597
ENSG00000121743
ENSG00000124104
ENSG00000197951
ENSG00000138100
ENSG00000103550
ENSG00000160570
ENSG00000168769
ENSG00000160949
ENSG00000173442
ENSG00000278384
ENSG00000072840
ENSG00000204209
ENSG00000188176
ENSG00000185614
ENSG00000179409
ENSG00000162065
ENSG00000134775
ENSG00000137267
ENSG00000103343
ENSG00000134817
ENSG00000140332
ENSG00000186566
ENSG00000165152
ENSG00000253873
ENSG00000174669
ENSG00000168924
ENSG00000243716
ENSG00000145014
ENSG00000167393
ENSG00000168040
ENSG00000101665
ENSG00000189241
ENSG00000178409
ENSG00000130294
ENSG00000022976
ENSG00000187866
ENSG00000161896
ENSG00000120549
ENSG00000141873
ENSG00000136444
ENSG00000174429
ENSG00000165879
ENSG00000107104
ENSG00000144596
ENSG00000180884
ENSG00000121753
ENSG00000274180
ENSG00000121903
ENSG00000183785
ENSG00000151474
ENSG00000130254
ENSG00000159792
ENSG00000133619
ENSG00000184451
ENSG00000007047
ENSG00000165632
ENSG00000089159
ENSG00000118194
ENSG00000196313
[truncated: 1,001 more rows]

## Sheet: Ctrl
ID	logFC	logCPM	LR	PValue	FDR	description	hgnc_symbol	X53861	X53863	X53875	X53877
[truncated: 16,026 more rows]

[truncated: 1 more sheets: Ctrl Enriched]
