# Supplementary material for: m6A-mRNA methylation regulates cardiac gene expression and cellular growth
Source: Life Sci Alliance. 2019 Apr 9;2(2):e201800233. doi: 10.26508/lsa.201800233 (PMC6458851; doi:10.26508/lsa.201800233)
Supplement: Supplementary file 2 [file LSA-2018-00233_TableS2.xlsx]

## Sheet: TAC
ID	logFC	logCPM	LR	PValue	FDR	description	mgi_symbol	Input1	Input 2	Input3	IP1	IP2	IP3
ENSMUSG00000022584	9.33069	1.38617	107.313	3.8014e-25	4.98059e-21	lymphocyte antigen 6 complex, locus C2 [Source:MGI Symbol;Acc:MGI:3712069]	Ly6c2	0	0	0	3.40338	5.84711	4.98989
ENSMUSG00000110234	8.02337	0.25509	42.2248	8.13598e-11	1.52282e-07	predicted gene 45799 [Source:MGI Symbol;Acc:MGI:5804914]	Gm45799	0	0	0	3.6918	1.69755	0.79485
ENSMUSG00000089865	4.792	1.50515	16.6261	4.55192e-05	0.00567993	predicted readthrough transcript (NMD candidate), 44503 [Source:MGI Symbol;Acc:MGI:5141975]	Gm44503	0	0	1.59072	7.32591	4.46392	2.51702
ENSMUSG00000049396	4.73278	3.3159	15.0126	0.000106798	0.00874539	gem nuclear organelle associated protein 4 [Source:MGI Symbol;Acc:MGI:2449313]	Gemin4	0	11.7189	0.265121	21.0548	12.8259	12.3643
ENSMUSG00000109941	3.77558	1.34625	29.9649	4.39949e-08	3.60263e-05	exosome component 6 [Source:MGI Symbol;Acc:MGI:1919794]	Exosc6	0.15484	0.188003	0.265121	8.65265	0.125744	4.32751
ENSMUSG00000015083	3.71251	-0.570474	10.6232	0.00111677	0.0318777	complement component 8, gamma polypeptide [Source:MGI Symbol;Acc:MGI:88237]	C8g	0	0.250671	0	0.865265	0.754466	1.14812
ENSMUSG00000026424	3.67879	-0.627736	10.9922	0.000914973	0.0293105	G protein-coupled receptor 37-like 1 [Source:MGI Symbol;Acc:MGI:1928503]	Gpr37l1	0	0	0.265121	0.692212	0.943082	1.01564
ENSMUSG00000059040	3.35988	4.34505	4.01019	0.0452261	0.200458	enolase 1B, retrotransposed [Source:MGI Symbol;Acc:MGI:3648653]	Eno1b	0	0	53.7532	0	20.8107	45.7922
ENSMUSG00000089844	3.22339	0.127274	5.38099	0.0203573	0.133417	RIKEN cDNA A530032D15Rik gene [Source:MGI Symbol;Acc:MGI:3037746]	A530032D15Rik	1.85808	0	0	1.21137	0.817338	1.81049
ENSMUSG00000098530	3.00654	-0.252124	5.17775	0.022878	0.140726	predicted gene, 28051 [Source:MGI Symbol;Acc:MGI:5547787]	Gm28051	0	0	0.729082	2.36506	0.314361	0.706533
ENSMUSG00000048826	2.97957	-0.995616	6.25618	0.0123761	0.103943	dishevelled-binding antagonist of beta-catenin 2 [Source:MGI Symbol;Acc:MGI:1920347]	Dact2	0	0	0.331401	0.576843	0.377233	0.79485
ENSMUSG00000026650	2.84055	-1.34086	4.22351	0.0398677	0.187371	meiosis expressed gene 1 [Source:MGI Symbol;Acc:MGI:1202878]	Meig1	0	0	0.19884	0	0.628722	0.662375
ENSMUSG00000091604	2.83563	-0.884176	4.46214	0.0346542	0.174972	predicted gene, 17349 [Source:MGI Symbol;Acc:MGI:4936983]	Gm17349	0	0.501342	0	0.576843	0.502977	0.750691
ENSMUSG00000041809	2.69832	-0.228653	10.2731	0.00134987	0.0341913	EF-hand domain (C-terminal) containing 1 [Source:MGI Symbol;Acc:MGI:1919127]	Efhc1	0	0.250671	0.331401	1.15369	1.25744	1.14812
ENSMUSG00000036067	2.66087	-0.322099	4.27808	0.0386069	0.184676	solute carrier family 2 (facilitated glucose transporter), member 6 [Source:MGI Symbol;Acc:MGI:2443286]	Slc2a6	0	0	1.3256	0.519159	1.00595	1.0598
ENSMUSG00000071068	2.61638	-0.252732	5.39217	0.0202273	0.133175	triggering receptor expressed on myeloid cells-like 2 [Source:MGI Symbol;Acc:MGI:2147038]	Treml2	0	0	1.12676	0.288422	1.06883	1.54554
ENSMUSG00000037638	2.56424	2.12881	48.0344	4.18806e-12	1.3718e-08	zinc finger and BTB domain containing 42 [Source:MGI Symbol;Acc:MGI:3644133]	Zbtb42	1.9355	0.877348	0.662802	11.5946	7.98476	2.25207
ENSMUSG00000035678	2.51626	0.0706435	10.199	0.00140518	0.0349434	tumor necrosis factor (ligand) superfamily, member 9 [Source:MGI Symbol;Acc:MGI:1101058]	Tnfsf9	0.619361	0	0.331401	1.78821	1.19457	1.41307
ENSMUSG00000038379	2.50532	-0.0372969	3.20932	0.0732198	0.258337	Ttk protein kinase [Source:MGI Symbol;Acc:MGI:1194921]	Ttk	0	0	2.38609	0.576843	1.00595	1.0598
ENSMUSG00000068762	2.47948	-0.989429	3.09577	0.078496	0.268666	glutathione S-transferase, mu 6 [Source:MGI Symbol;Acc:MGI:1309467]	Gstm6	0	0.626677	0	0.40379	0.440105	0.662375
ENSMUSG00000091712	2.45648	0.263219	5.36764	0.0205137	0.133894	SEC14-like lipid binding 5 [Source:MGI Symbol;Acc:MGI:3616084]	Sec14l5	0	1.06535	0.19884	2.59579	0.817338	1.45722
ENSMUSG00000067889	2.24683	-0.469135	2.92536	0.0871979	0.284772	spectrin beta, non-erythrocytic 2 [Source:MGI Symbol;Acc:MGI:1313261]	Sptbn2	0.774201	0.125335	0	0.288422	1.25744	1.0598
ENSMUSG00000019856	2.18815	-0.625355	5.92026	0.0149678	0.113752	family with sequence similarity 184, member A [Source:MGI Symbol;Acc:MGI:1923156]	Fam184a	0.30968	0	0.265121	1.15369	0.251489	0.971483
ENSMUSG00000091694	2.13408	-0.965725	3.46523	0.0626718	0.238215	apolipoprotein L 11b [Source:MGI Symbol;Acc:MGI:3036248]	Apol11b	0.696781	0	0	1.26906	0.188616	0.220792
ENSMUSG00000045349	2.13223	-0.335082	5.6265	0.0176909	0.124282	SH2 domain containing 5 [Source:MGI Symbol;Acc:MGI:2446215]	Sh2d5	0.774201	0	0.19884	1.26906	0.754466	0.927324
ENSMUSG00000035390	2.1146	0.188462	6.87914	0.00872075	0.0854075	BR serine/threonine kinase 1 [Source:MGI Symbol;Acc:MGI:2685946]	Brsk1	0	0.940016	0.397681	1.26906	1.44606	1.72217
ENSMUSG00000036095	2.0811	0.491635	9.24914	0.00235607	0.0449988	diacylglycerol kinase, beta [Source:MGI Symbol;Acc:MGI:2442474]	Dgkb	0.23226	0.501342	0.596521	2.59579	2.82925	0.839008
ENSMUSG00000022041	2.06938	-0.245032	5.84334	0.0156361	0.116202	cholinergic receptor, nicotinic, alpha polypeptide 2 (neuronal) [Source:MGI Symbol;Acc:MGI:87886]	Chrna2	0.30968	0.689345	0	1.26906	1.19457	0.750691
ENSMUSG00000028003	2.00732	-1.47808	2.00218	0.157073	0.39071	lecithin-retinol acyltransferase (phosphatidylcholine-retinol-O-acyltransferase) [Source:MGI Symbol;Acc:MGI:1891259]	Lrat	0	0	0.463961	0.288422	0.314361	0.309108
ENSMUSG00000036523	1.9999	-0.112645	4.98322	0.0255944	0.148979	gene regulated by estrogen in breast cancer protein [Source:MGI Symbol;Acc:MGI:2149712]	Greb1	0	0.56401	0.397681	1.73053	1.38319	0.618216
ENSMUSG00000094410	1.99372	6.74073	7.23713	0.00714111	0.0771334	predicted gene, 38394 [Source:MGI Symbol;Acc:MGI:5614057]	Gm38394	114.117	1.44136	96.3051	226.411	78.2758	124.129
ENSMUSG00000079605	1.96018	3.27913	4.36562	0.0366711	0.179918	zinc finger and BTB domain containing 9 [Source:MGI Symbol;Acc:MGI:1918022]	Zbtb9	0	7.89613	8.28502	17.6514	10.4997	12.4968
ENSMUSG00000045275	1.92141	-0.0569632	5.11048	0.0237818	0.14319	Leber congenital amaurosis 5-like [Source:MGI Symbol;Acc:MGI:3041157]	Lca5l	0.464521	0	0.729082	2.13432	0.691594	0.883166
ENSMUSG00000015316	1.91936	-1.79737	1.72108	0.189554	0.432582	signaling lymphocytic activation molecule family member 1 [Source:MGI Symbol;Acc:MGI:1351314]	Slamf1	0	0	0.19884	0.346106	0	0.353266
ENSMUSG00000037318	1.90888	-0.345948	5.89392	0.0151932	0.114733	TRAF3 interacting protein 3 [Source:MGI Symbol;Acc:MGI:2441706]	Traf3ip3	0.15484	0.313339	0.265121	0.692212	0.691594	1.54554
ENSMUSG00000093805	1.90652	-0.667791	3.75211	0.052741	0.217642	galactose-3-O-sulfotransferase 2B [Source:MGI Symbol;Acc:MGI:3711964]	Gal3st2b	0.3871	0	0.19884	1.38442	0	0.883166
ENSMUSG00000026163	1.87948	0.228096	5.87102	0.0153921	0.11537	SPHK1 interactor, AKAP domain containing [Source:MGI Symbol;Acc:MGI:1924879]	Sphkap	0	0.689345	0.795362	1.44211	1.38319	1.67802
ENSMUSG00000048852	1.86939	-0.448449	3.82856	0.0503863	0.212469	predicted gene 12185 [Source:MGI Symbol;Acc:MGI:3652173]	Gm12185	0.3871	0.438674	0	1.55748	0.440105	0.706533
ENSMUSG00000047171	1.86011	-0.767278	1.77265	0.183054	0.424364	helt bHLH transcription factor [Source:MGI Symbol;Acc:MGI:3040955]	Helt	0	0	1.3256	0.576843	0.251489	0.574058
ENSMUSG00000050511	1.83822	-0.380936	4.92194	0.0265177	0.151586	opioid receptor, delta 1 [Source:MGI Symbol;Acc:MGI:97438]	Oprd1	0	0.313339	0.530241	0.288422	0.88021	1.54554
ENSMUSG00000034795	1.83539	0.0745592	6.00364	0.0142764	0.111225	coiled-coil domain containing 122 [Source:MGI Symbol;Acc:MGI:1918358]	Ccdc122	0.23226	0.501342	0.331401	2.07664	0.628722	1.50138
ENSMUSG00000046449	1.83189	-0.261904	3.79421	0.0514302	0.21494	expressed sequence C77370 [Source:MGI Symbol;Acc:MGI:2148050]	C77370	0	0.250671	0.596521	1.26906	0.251489	1.54554
ENSMUSG00000000120	1.81853	0.0163511	4.20073	0.0404066	0.188535	nerve growth factor receptor (TNFR superfamily, member 16) [Source:MGI Symbol;Acc:MGI:97323]	Ngfr	0.696781	0	0.662802	1.15369	1.5718	1.14812
ENSMUSG00000038354	1.72399	1.12644	10.9708	0.000925584	0.0293148	ankyrin repeat domain 35 [Source:MGI Symbol;Acc:MGI:2442590]	Ankrd35	1.23872	0.313339	1.25932	5.36464	2.13765	1.85465
ENSMUSG00000051149	1.71514	6.24249	3.91245	0.0479297	0.206494	activity-dependent neuroprotective protein [Source:MGI Symbol;Acc:MGI:1338758]	Adnp	99.6397	1.25335	59.387	107.985	103.928	81.3838
ENSMUSG00000011171	1.70982	-0.178776	3.29697	0.0694077	0.251274	vasoactive intestinal peptide receptor 2 [Source:MGI Symbol;Acc:MGI:107166]	Vipr2	0	0.626677	0.463961	1.49979	0.628722	1.10396
ENSMUSG00000040812	1.70958	-0.000963094	4.17228	0.0410905	0.190337	ATP/GTP binding protein-like 2 [Source:MGI Symbol;Acc:MGI:2443254]	Agbl2	0.30968	0	1.19304	1.78821	0.314361	1.41307
ENSMUSG00000026679	1.69923	-0.131211	4.64842	0.0310822	0.164968	enkurin, TRPC channel interacting protein [Source:MGI Symbol;Acc:MGI:1918483]	Enkur	0	0.56401	0.662802	0.749896	1.25744	1.28059
ENSMUSG00000053166	1.69559	0.626858	8.16638	0.00426741	0.0596296	cadherin 22 [Source:MGI Symbol;Acc:MGI:1341843]	Cdh22	0.15484	1.56669	0.463961	1.49979	3.58371	1.14812
ENSMUSG00000026228	1.69535	0.0872676	3.77441	0.0520421	0.216669	5-hydroxytryptamine (serotonin) receptor 2B [Source:MGI Symbol;Acc:MGI:109323]	Htr2b	0	0.56401	0.994202	1.32674	1.69755	0.927324
ENSMUSG00000078815	1.67666	-0.0958985	5.79657	0.0160575	0.117665	calcium channel, voltage-dependent, gamma subunit 6 [Source:MGI Symbol;Acc:MGI:1859168]	Cacng6	0.23226	0.438674	0.397681	0.692212	1.19457	1.63386
ENSMUSG00000033855	1.67046	3.39488	28.6733	8.56758e-08	6.42642e-05	stonin 1 [Source:MGI Symbol;Acc:MGI:1924307]	Ston1	5.49683	4.95075	2.18725	28.0923	18.3587	3.1794
ENSMUSG00000051037	1.66354	0.704043	8.46587	0.00361873	0.055154	zinc finger protein 455 [Source:MGI Symbol;Acc:MGI:3040708]	Zfp455	0.464521	0.81468	0.729082	3.34569	1.69755	1.72217
ENSMUSG00000045062	1.62984	0.324674	3.98255	0.045974	0.201725	protocadherin beta 7 [Source:MGI Symbol;Acc:MGI:2136741]	Pcdhb7	0.464521	1.19069	0.13256	2.30737	0.817338	1.5897
ENSMUSG00000028261	1.62521	5.62896	34.4165	4.44947e-09	4.85808e-06	NADH dehydrogenase (ubiquinone) 1 alpha subcomplex, assembly factor 4 [Source:MGI Symbol;Acc:MGI:1915743]	Ndufaf4	47.8456	15.4789	17.034	71.2978	67.7762	76.2614
ENSMUSG00000094595	1.6117	-0.0287148	5.50827	0.0189268	0.128608	fibrinogen silencer binding protein [Source:MGI Symbol;Acc:MGI:5301008]	Fsbp	0.23226	0.752013	0.265121	1.096	2.13765	0.618216
ENSMUSG00000094634	1.58744	0.0539911	4.96959	0.0257967	0.149685	predicted gene 3468 [Source:MGI Symbol;Acc:MGI:3781644]	Gm3468	0.464521	0.752013	0.13256	2.36506	1.1317	0.574058
ENSMUSG00000010461	1.57873	-0.371933	2.95114	0.0858172	0.282375	EYA transcriptional coactivator and phosphatase 4 [Source:MGI Symbol;Acc:MGI:1337104]	Eya4	0.3871	0	0.795362	0.865265	0.817338	0.927324
ENSMUSG00000048279	1.57048	7.78713	50.9756	9.35236e-13	4.08449e-09	sacsin [Source:MGI Symbol;Acc:MGI:1354724]	Sacs	204.079	65.4251	89.4119	381.409	234.073	349.557
ENSMUSG00000041064	1.54852	-0.170908	2.11466	0.145895	0.374985	PIF1 5'-to-3' DNA helicase [Source:MGI Symbol;Acc:MGI:2143057]	Pif1	0	0.501342	0.530241	1.73053	0.251489	1.28059
ENSMUSG00000061815	1.54781	0.597367	4.21047	0.0401752	0.187857	RUN and FYVE domain containing 4 [Source:MGI Symbol;Acc:MGI:3588214]	Rufy4	0	1.25335	1.19304	1.73053	1.44606	2.34039
ENSMUSG00000047033	1.54085	-0.0586133	4.80681	0.0283476	0.156526	protocadherin beta 15 [Source:MGI Symbol;Acc:MGI:2136750]	Pcdhb15	0.30968	0.188003	0.795362	1.32674	0.754466	1.41307
ENSMUSG00000092470	1.53122	1.39094	4.91797	0.0265788	0.151702	predicted gene 20518 [Source:MGI Symbol;Acc:MGI:5141983]	Gm20518	2.3226	0	2.65121	5.76843	2.07478	2.1196
ENSMUSG00000073293	1.52703	-0.229451	2.56439	0.109295	0.321681	nudix (nucleoside diphosphate linked moiety X)-type motif 10 [Source:MGI Symbol;Acc:MGI:2147931]	Nudt10	0	0.81468	0.397681	0.634528	0.502977	1.67802
ENSMUSG00000031665	1.52127	-0.417418	2.92007	0.0874839	0.28527	sal-like 1 (Drosophila) [Source:MGI Symbol;Acc:MGI:1889585]	Sall1	0	0.689345	0.397681	0.692212	0.817338	0.971483
ENSMUSG00000034059	1.502	0.104245	3.24714	0.0715483	0.254666	yippee-like 4 (Drosophila) [Source:MGI Symbol;Acc:MGI:3605071]	Ypel4	0.774201	1.00268	0	2.13432	0.88021	0.839008
ENSMUSG00000039264	1.49297	-0.45351	2.56363	0.109347	0.321681	GTPase, IMAP family member 3 [Source:MGI Symbol;Acc:MGI:1932723]	Gimap3	0	0.438674	0.596521	0.519159	1.5718	0.485741
ENSMUSG00000072437	1.49211	-0.418768	3.49316	0.0616229	0.236215	nanos homolog 1 (Drosophila) [Source:MGI Symbol;Acc:MGI:2669254]	Nanos1	0.3871	0.250671	0.265121	0.461475	1.06883	1.14812
ENSMUSG00000051146	1.4583	-0.489328	2.63442	0.10457	0.313655	calcium/calmodulin-dependent protein kinase II inhibitor 2 [Source:MGI Symbol;Acc:MGI:1920297]	Camk2n2	0	0.501342	0.530241	0.749896	0.817338	0.79485
ENSMUSG00000102692	1.45575	1.88445	10.4802	0.00120658	0.032729	dachsous 2 (Drosophila) [Source:MGI Symbol;Acc:MGI:2685263]	Dchs2	3.0968	2.19337	0.530241	8.65265	2.57776	4.06256
ENSMUSG00000073436	1.45106	4.79834	27.8845	1.28774e-07	7.68845e-05	essential meiotic structure-specific endonuclease subunit 2 [Source:MGI Symbol;Acc:MGI:1919889]	Eme2	13.8582	22.5604	9.21294	53.0119	30.5559	36.3864
ENSMUSG00000094076	1.44045	1.69035	4.10262	0.0428169	0.194828	predicted gene 4767 [Source:MGI Symbol;Acc:MGI:3644409]	Gm4767	3.63874	0	3.24773	4.49938	3.26935	3.88593
ENSMUSG00000027347	1.42959	-0.725474	1.50212	0.220345	0.470495	RAS guanyl releasing protein 1 [Source:MGI Symbol;Acc:MGI:1314635]	Rasgrp1	0	0	0.994202	0	0.314361	1.32475
ENSMUSG00000098022	1.42708	1.81859	16.6352	4.53017e-05	0.00567993	zinc finger protein 82 [Source:MGI Symbol;Acc:MGI:1890753]	Zfp82	1.70324	2.44404	1.3256	3.74948	6.03573	4.81326
ENSMUSG00000049107	1.41794	1.56646	14.3961	0.000148107	0.0108407	neurotrophin 3 [Source:MGI Symbol;Acc:MGI:97380]	Ntf3	1.39356	1.81736	1.3256	4.38401	3.77233	3.97425
ENSMUSG00000059213	1.4178	-0.302675	2.12503	0.14491	0.373816	dendrin [Source:MGI Symbol;Acc:MGI:108101]	Ddn	0	1.25335	0.265121	0.749896	0.817338	0.883166
ENSMUSG00000038077	1.40595	1.39831	12.3035	0.000452105	0.0194852	potassium voltage-gated channel, shaker-related, subfamily, member 6 [Source:MGI Symbol;Acc:MGI:96663]	Kcna6	1.39356	2.06803	0.729082	3.98022	4.14956	2.56118
ENSMUSG00000028444	1.40101	0.0615739	2.94844	0.0859603	0.28242	ciliary neurotrophic factor receptor [Source:MGI Symbol;Acc:MGI:99605]	Cntfr	0.23226	1.88003	0	0.519159	2.2634	0.618216
ENSMUSG00000041930	1.38857	0.654477	4.82678	0.028021	0.155696	family with sequence similarity 222, member A [Source:MGI Symbol;Acc:MGI:3605543]	Fam222a	1.9355	0.940016	0	3.74948	1.44606	0.706533
ENSMUSG00000073491	1.38265	0.606733	2.33732	0.126307	0.348574	interferon activated gene 213 [Source:MGI Symbol;Acc:MGI:3695276]	Ifi213	0	0	3.38029	0.865265	0	3.62098
ENSMUSG00000040978	1.37874	-0.173684	3.88341	0.0487655	0.208282	predicted gene 11992 [Source:MGI Symbol;Acc:MGI:3651127]	Gm11992	0.464521	0.501342	0.265121	0.980634	1.00595	1.19227
ENSMUSG00000040009	1.3772	0.124027	4.58181	0.032313	0.168411	guanine nucleotide binding protein, alpha z subunit [Source:MGI Symbol;Acc:MGI:95780]	Gnaz	0.619361	0.438674	0.463961	1.96127	1.5718	0.706533
ENSMUSG00000035095	1.37309	-0.431634	1.27387	0.259041	0.513303	family with sequence similarity 167, member A [Source:MGI Symbol;Acc:MGI:3606565]	Fam167a	0	0.250671	1.06048	1.26906	0.754466	0.353266
ENSMUSG00000022676	1.36701	1.5297	7.95821	0.00478697	0.0629718	snail family zinc finger 2 [Source:MGI Symbol;Acc:MGI:1096393]	Snai2	1.70324	2.88272	0.331401	6.74907	3.01786	1.76633
ENSMUSG00000086564	1.3603	-0.0921878	2.41748	0.119987	0.338779	CD101 antigen [Source:MGI Symbol;Acc:MGI:2685862]	Cd101	0.851621	0.626677	0	2.30737	0.440105	0.618216
ENSMUSG00000067261	1.34617	-0.570154	1.59853	0.206112	0.45373	forkhead box D3 [Source:MGI Symbol;Acc:MGI:1347473]	Foxd3	0	1.25335	0.13256	0.346106	0.691594	0.750691
ENSMUSG00000053647	1.34404	1.20681	7.91792	0.00489475	0.0635612	G protein-coupled estrogen receptor 1 [Source:MGI Symbol;Acc:MGI:1924104]	Gper1	1.78066	0.626677	1.3256	3.63411	3.58371	2.07544
ENSMUSG00000048534	1.34012	-0.936706	1.87294	0.171139	0.410406	junction adhesion molecule like [Source:MGI Symbol;Acc:MGI:2685484]	Jaml	0	0.438674	0.265121	0.230737	0.502977	0.79485
ENSMUSG00000022686	1.33821	0.159635	2.29193	0.130048	0.353872	UDP-GlcNAc:betaGal beta-1,3-N-acetylglucosaminyltransferase 5 [Source:MGI Symbol;Acc:MGI:2137302]	B3gnt5	1.1613	0.877348	0	1.32674	1.06883	1.41307
ENSMUSG00000107928	1.33524	2.48452	1.72259	0.189361	0.432381	predicted gene 45140 [Source:MGI Symbol;Acc:MGI:5753716]	Gm45140	0.851621	0.752013	0.331401	0.519159	0.691594	27.4665
ENSMUSG00000043448	1.33514	0.119289	3.25832	0.0710617	0.254187	gap junction protein, gamma 2 [Source:MGI Symbol;Acc:MGI:2153060]	Gjc2	1.00646	1.00268	0	1.55748	1.63468	0.618216
ENSMUSG00000014303	1.328	3.22721	10.9545	0.000933769	0.0294092	GLIS family zinc finger 2 [Source:MGI Symbol;Acc:MGI:1932535]	Glis2	3.871	3.19605	9.74318	15.171	14.4606	8.74334
ENSMUSG00000047246	1.32796	3.37392	31.4761	2.01908e-08	1.88957e-05	histone cluster 1, H2be [Source:MGI Symbol;Acc:MGI:2448380]	Hist1h2be	6.34845	4.13607	7.09198	14.5941	13.3289	15.4554
ENSMUSG00000030670	1.31126	0.184476	3.49705	0.0614781	0.235906	cytochrome P450, family 2, subfamily r, polypeptide 1 [Source:MGI Symbol;Acc:MGI:2449771]	Cyp2r1	0.30968	0.56401	0.795362	1.96127	1.5718	0.79485
ENSMUSG00000069184	1.3102	1.97914	10.8653	0.000979816	0.0297904	zinc finger protein 72 [Source:MGI Symbol;Acc:MGI:3033356]	Zfp72	1.39356	2.56938	2.31981	7.7297	3.70946	4.7691
ENSMUSG00000006471	1.29595	4.01863	43.1602	5.04358e-11	1.10135e-07	NADPH dependent diflavin oxidoreductase 1 [Source:MGI Symbol;Acc:MGI:1926047]	Ndor1	11.3033	7.01879	9.61062	27.227	20.1191	20.7986
ENSMUSG00000024798	1.29464	-0.310093	1.59229	0.206999	0.453891	5-hydroxytryptamine (serotonin) receptor 7 [Source:MGI Symbol;Acc:MGI:99841]	Htr7	2.09034	0.125335	0	1.096	0.754466	0.309108
ENSMUSG00000024440	1.28506	4.19531	22.4087	2.20375e-06	0.000641635	protocadherin 12 [Source:MGI Symbol;Acc:MGI:1855700]	Pcdh12	9.67751	14.1629	7.48966	37.0333	18.4215	21.8584
ENSMUSG00000034266	1.28201	0.355134	4.57219	0.0324949	0.168638	basic leucine zipper transcription factor, ATF-like [Source:MGI Symbol;Acc:MGI:1859147]	Batf	0.464521	0.81468	0.662802	2.07664	1.63468	1.14812
ENSMUSG00000021485	1.27923	0.125344	4.23887	0.0395086	0.187027	Max dimerization protein 3 [Source:MGI Symbol;Acc:MGI:104987]	Mxd3	0.464521	0.438674	0.729082	1.44211	1.06883	1.45722
ENSMUSG00000070737	1.27262	0.113247	2.89007	0.0891271	0.289117	transmembrane protein 35B [Source:MGI Symbol;Acc:MGI:3758095]	Tmem35b	0.929041	0.0626677	0.927922	1.38442	1.1317	1.23643
ENSMUSG00000040987	1.26458	2.46174	19.1427	1.21301e-05	0.00230332	MHC I like leukocyte 2 [Source:MGI Symbol;Acc:MGI:2179989]	Mill2	3.4839	2.75738	3.04889	9.80634	6.91594	6.00553
ENSMUSG00000048572	1.26415	0.745291	3.25051	0.0714014	0.25442	transmembrane protein 252 [Source:MGI Symbol;Acc:MGI:3583948]	Tmem252	0	1.31602	1.9884	1.44211	1.82329	2.42871
ENSMUSG00000021464	1.25429	1.97901	4.38843	0.0361837	0.178851	receptor tyrosine kinase-like orphan receptor 2 [Source:MGI Symbol;Acc:MGI:1347521]	Ror2	5.88393	3.50939	0	7.03749	4.27531	2.38455
ENSMUSG00000040121	1.25102	0.587727	4.85804	0.0275176	0.154273	RAB15 effector protein [Source:MGI Symbol;Acc:MGI:1913782]	Rep15	0.774201	0.626677	0.795362	2.9419	0.817338	2.03128
ENSMUSG00000039903	1.24964	0.74882	6.14202	0.0132006	0.10696	eva-1 homolog C (C. elegans) [Source:MGI Symbol;Acc:MGI:1918217]	Eva1c	1.39356	0.626677	0.729082	2.76885	1.50893	2.1196
ENSMUSG00000031478	1.24921	0.817282	3.10567	0.07802	0.267678	NIMA (never in mitosis gene a)-related expressed kinase 3 [Source:MGI Symbol;Acc:MGI:1344371]	Nek3	0	1.69203	1.85584	1.49979	2.89212	1.72217
ENSMUSG00000038390	1.24751	-0.374134	1.45837	0.22719	0.478868	G protein-coupled receptor 162 [Source:MGI Symbol;Acc:MGI:1315214]	Gpr162	0	1.31602	0.265121	0.692212	0.628722	0.839008
ENSMUSG00000032717	1.2442	-0.0623984	3.45218	0.0631683	0.239407	MyoD family inhibitor [Source:MGI Symbol;Acc:MGI:107687]	Mdfi	0.774201	0.313339	0.397681	1.26906	0.88021	1.23643
ENSMUSG00000074657	1.23397	0.277113	4.08084	0.043372	0.196223	kinesin family member 5A [Source:MGI Symbol;Acc:MGI:109564]	Kif5a	0.929041	0.438674	0.530241	2.192	1.63468	0.79485
ENSMUSG00000058743	1.22967	0.900567	5.86875	0.015412	0.115387	potassium inwardly-rectifying channel, subfamily J, member 14 [Source:MGI Symbol;Acc:MGI:2384820]	Kcnj14	1.5484	1.06535	0.331401	4.96085	1.69755	0.839008
ENSMUSG00000029616	1.22824	5.89553	19.1661	1.19824e-05	0.00230332	endoplasmic reticulum protein 29 [Source:MGI Symbol;Acc:MGI:1914647]	Erp29	48.9295	13.0976	55.2777	103.197	63.3123	72.2871
ENSMUSG00000022490	1.2243	0.201313	2.87013	0.0902378	0.291063	protein phosphatase 1, regulatory (inhibitor) subunit 1A [Source:MGI Symbol;Acc:MGI:1889595]	Ppp1r1a	0.774201	1.50403	0	1.26906	2.13765	0.5299
ENSMUSG00000026443	1.21514	2.36522	9.17874	0.00244842	0.0459294	leucine rich repeat protein 2, neuronal [Source:MGI Symbol;Acc:MGI:106037]	Lrrn2	2.78712	6.64278	0.795362	9.74865	6.79019	3.26771
ENSMUSG00000060224	1.21366	0.84586	4.81274	0.0282502	0.15624	pyridine nucleotide-disulphide oxidoreductase domain 2 [Source:MGI Symbol;Acc:MGI:1921830]	Pyroxd2	0.851621	1.69203	0.530241	2.9419	1.76042	2.03128
ENSMUSG00000041716	1.21271	2.92978	6.44457	0.0111292	0.0985212	predicted gene 20604 [Source:MGI Symbol;Acc:MGI:5305180]	Gm20604	1.78066	5.45209	5.89893	17.0169	7.85902	6.57959
ENSMUSG00000047810	1.21192	2.16119	14.0256	0.000180343	0.0120554	coiled-coil domain containing 88B [Source:MGI Symbol;Acc:MGI:1925567]	Ccdc88b	3.63874	1.56669	2.78377	6.40296	5.40701	6.00553
ENSMUSG00000029720	1.21192	2.67453	2.89665	0.0887637	0.288152	predicted gene 20605 [Source:MGI Symbol;Acc:MGI:5306917]	Gm20605	0.464521	9.9015	3.91053	10.3832	5.15552	7.24196
ENSMUSG00000050954	1.21	3.2741	18.6868	1.54044e-05	0.00262115	zinc finger protein 169 [Source:MGI Symbol;Acc:MGI:1915161]	Zfp169	5.80651	6.83078	3.51285	22.0931	13.0145	5.87305
ENSMUSG00000035509	1.20612	0.0680884	2.2201	0.136224	0.362265	F-box and leucine-rich repeat protein 21 [Source:MGI Symbol;Acc:MGI:2442921]	Fbxl21	0	1.12802	0.795362	0.922949	1.88616	0.750691
ENSMUSG00000043572	1.20155	2.57361	13.1093	0.000293838	0.015157	prolyl-tRNA synthetase (mitochondrial)(putative) [Source:MGI Symbol;Acc:MGI:2386296]	Pars2	4.64521	1.7547	4.30821	11.3638	6.97881	5.74058
ENSMUSG00000021950	1.20082	-1.12001	0.851979	0.355993	0.603881	annexin A8 [Source:MGI Symbol;Acc:MGI:1201374]	Anxa8	0	0.877348	0	0	0.817338	0.309108
ENSMUSG00000027654	1.18891	-0.21291	2.39534	0.121697	0.341754	family with sequence similarity 83, member D [Source:MGI Symbol;Acc:MGI:1919128]	Fam83d	0.696781	0	0.729082	1.21137	0.188616	1.41307
ENSMUSG00000031669	1.18638	1.7012	11.0743	0.000875339	0.0286002	GINS complex subunit 3 (Psf3 homolog) [Source:MGI Symbol;Acc:MGI:1926083]	Gins3	2.55486	1.00268	2.18725	5.5377	3.01786	4.19504
ENSMUSG00000034209	1.18495	0.798339	5.60572	0.0179019	0.125161	RAS-like, family 10, member A [Source:MGI Symbol;Acc:MGI:1922918]	Rasl10a	0.619361	1.19069	1.06048	1.8459	1.94904	2.69366
ENSMUSG00000022861	1.18172	0.0346441	3.46355	0.0627356	0.238388	diacylglycerol kinase, gamma [Source:MGI Symbol;Acc:MGI:105060]	Dgkg	0.619361	0.689345	0.331401	1.49979	1.25744	0.927324
ENSMUSG00000036412	1.18163	0.754857	5.4679	0.0193689	0.130006	arylsulfatase i [Source:MGI Symbol;Acc:MGI:2670959]	Arsi	1.23872	0.56401	1.06048	2.192	1.82329	2.29623
ENSMUSG00000045555	1.18112	-0.280129	2.03634	0.153579	0.385773	methyltransferase like 24 [Source:MGI Symbol;Acc:MGI:3045338]	Mettl24	0	0.81468	0.596521	0.461475	0.817338	1.28059
ENSMUSG00000043505	1.17722	2.44135	6.24921	0.0124249	0.103975	GTPase, IMAP family member 5 [Source:MGI Symbol;Acc:MGI:2442232]	Gimap5	1.08388	3.82273	5.36869	9.28718	6.60158	5.34316
ENSMUSG00000000037	1.17696	-0.106181	1.83959	0.174999	0.415294	sex comb on midleg-like 2 (Drosophila) [Source:MGI Symbol;Acc:MGI:1340042]	Scml2	0.23226	1.19069	0.19884	0.807581	0.691594	1.45722
ENSMUSG00000079144	1.17365	2.79827	13.4018	0.000251382	0.0141433	RIKEN cDNA A130010J15 gene [Source:MGI Symbol;Acc:MGI:2441776]	A130010J15Rik	5.49683	6.76811	1.39188	10.0948	10.6883	6.40295
ENSMUSG00000060548	1.1735	1.69136	10.7683	0.00103254	0.0303326	tumor necrosis factor receptor superfamily, member 19 [Source:MGI Symbol;Acc:MGI:1352474]	Tnfrsf19	2.01292	2.38137	1.25932	3.51874	6.0986	3.22356
ENSMUSG00000048445	1.16672	1.75328	7.33317	0.00676937	0.074594	coiled-coil domain containing 57 [Source:MGI Symbol;Acc:MGI:1918526]	Ccdc57	4.18068	1.88003	0.596521	5.8838	3.08074	3.75346
ENSMUSG00000036957	1.16455	1.26566	6.34024	0.0118029	0.101669	leucine rich repeat and fibronectin type III domain containing 3 [Source:MGI Symbol;Acc:MGI:2442512]	Lrfn3	0.929041	2.25604	1.06048	3.80717	2.76638	2.60534
ENSMUSG00000058900	1.15895	1.38822	7.84984	0.00508252	0.0645889	regulator of sex limited protein 1 [Source:MGI Symbol;Acc:MGI:3044162]	Rsl1	1.00646	0.940016	2.78377	3.23032	2.45201	4.15088
ENSMUSG00000049556	1.15872	0.300519	2.10322	0.14699	0.376807	leucine rich repeat and Ig domain containing 1 [Source:MGI Symbol;Acc:MGI:1915522]	Lingo1	1.70324	1.00268	0	1.26906	1.94904	0.839008
ENSMUSG00000051235	1.15822	0.506633	4.33424	0.037353	0.181259	GEN1, Holliday junction 5' flap endonuclease [Source:MGI Symbol;Acc:MGI:2443149]	Gen1	1.39356	0.501342	0.596521	2.192	1.5718	1.45722
ENSMUSG00000035799	1.15735	1.1661	6.45956	0.0110357	0.0980287	twist basic helix-loop-helix transcription factor 1 [Source:MGI Symbol;Acc:MGI:98872]	Twist1	1.23872	1.62936	0.927922	4.21096	2.20053	2.29623
ENSMUSG00000003484	1.15072	0.272322	2.63073	0.104814	0.314034	cytochrome P450, family 4, subfamily f, polypeptide 18 [Source:MGI Symbol;Acc:MGI:1919304]	Cyp4f18	0	1.44136	0.662802	0.115369	1.94904	2.03128
ENSMUSG00000055978	1.14872	-0.534804	1.31261	0.251923	0.506475	fucosyltransferase 2 [Source:MGI Symbol;Acc:MGI:109374]	Fut2	0	0.438674	0.795362	0.692212	1.00595	0.441583
ENSMUSG00000031079	1.14797	0.327317	3.75645	0.0526041	0.217288	zinc finger protein 300 [Source:MGI Symbol;Acc:MGI:3045326]	Zfp300	0.696781	0.501342	0.795362	2.30737	1.00595	1.32475
ENSMUSG00000022543	1.14238	0.357188	3.74493	0.052968	0.218014	RIKEN cDNA 4930451G09 gene [Source:MGI Symbol;Acc:MGI:1921934]	4930451G09Rik	0.541941	0.752013	0.795362	1.96127	1.63468	1.14812
ENSMUSG00000021572	1.13209	-0.169907	2.22234	0.136027	0.361946	centrosomal protein 72 [Source:MGI Symbol;Acc:MGI:1921720]	Cep72	0	0.689345	0.795362	0.230737	1.06883	1.54554
ENSMUSG00000052504	1.13134	-0.612496	1.29877	0.254438	0.508618	Eph receptor A3 [Source:MGI Symbol;Acc:MGI:99612]	Epha3	0.3871	0.626677	0	0.173053	1.69755	0.353266
ENSMUSG00000034614	1.13033	5.243	47.4881	5.53387e-12	1.45009e-08	phosphoinositide-3-kinase interacting protein 1 [Source:MGI Symbol;Acc:MGI:1917016]	Pik3ip1	23.226	26.4458	21.2096	55.0309	54.4473	45.7038
ENSMUSG00000050071	1.12506	0.373737	3.48713	0.0618476	0.236454	brain expressed X-linked 1 [Source:MGI Symbol;Acc:MGI:1328321]	Bex1	0.774201	0.188003	1.3256	1.38442	0.88021	2.20792
ENSMUSG00000051344	1.12392	4.71304	20.8702	4.91478e-06	0.00126262	pleckstrin homology domain containing, family M, member 3 [Source:MGI Symbol;Acc:MGI:2443627]	Plekhm3	14.1679	12.9722	22.2701	44.6477	34.7054	27.5106
ENSMUSG00000045348	1.11992	0.746151	1.92558	0.165243	0.401895	neuronal tyrosine-phosphorylated phosphoinositide 3-kinase adaptor 1 [Source:MGI Symbol;Acc:MGI:2443880]	Nyap1	0.30968	1.12802	0.994202	3.80717	0.440105	2.25207
ENSMUSG00000028584	1.11937	-1.35551	0.581337	0.445789	0.679623	leucine rich repeat containing 38 [Source:MGI Symbol;Acc:MGI:2442845]	Lrrc38	0	0	0.397681	0	0	0.971483
ENSMUSG00000038965	1.11839	5.59312	9.83912	0.00170839	0.038592	ubiquitin-conjugating enzyme E2L 3 [Source:MGI Symbol;Acc:MGI:109240]	Ube2l3	72.6975	19.9283	15.377	55.55	66.4559	58.9072
ENSMUSG00000078816	1.11805	0.741155	2.93973	0.0864252	0.283156	protein kinase C, gamma [Source:MGI Symbol;Acc:MGI:97597]	Prkcg	1.62582	1.37869	0.19884	1.96127	1.69755	2.25207
ENSMUSG00000029449	1.11797	0.136953	3.10143	0.0782237	0.268155	ras homolog family member F (in filopodia) [Source:MGI Symbol;Acc:MGI:1345629]	Rhof	0.696781	0.81468	0.331401	1.61516	1.1317	1.14812
ENSMUSG00000035681	1.11072	0.107298	3.18857	0.0741549	0.259697	potassium voltage gated channel, Shaw-related subfamily, member 2 [Source:MGI Symbol;Acc:MGI:96668]	Kcnc2	0.619361	0.501342	0.596521	1.78821	0.88021	1.19227
ENSMUSG00000091736	1.10952	1.56701	4.28971	0.0383438	0.184044	Yy2 transcription factor [Source:MGI Symbol;Acc:MGI:3837947]	Yy2	5.88393	0.125335	1.06048	6.74907	2.07478	1.45722
ENSMUSG00000045281	1.10824	0.14296	2.19572	0.138395	0.365133	G protein-coupled receptor 20 [Source:MGI Symbol;Acc:MGI:2441803]	Gpr20	1.00646	0.626677	0.19884	1.21137	0.754466	1.85465
ENSMUSG00000051147	1.10614	0.932487	5.73535	0.0166267	0.120391	N-acetyltransferase 2 (arylamine N-acetyltransferase) [Source:MGI Symbol;Acc:MGI:109201]	Nat2	1.23872	0.752013	1.3256	2.36506	1.82329	2.91445
ENSMUSG00000039774	1.09975	-0.175694	1.85364	0.17336	0.413427	UDP-N-acetyl-alpha-D-galactosamine:polypeptide N-acetylgalactosaminyltransferase 12 [Source:MGI Symbol;Acc:MGI:2444664]	Galnt12	1.00646	0.250671	0.265121	0.692212	0.754466	1.45722
ENSMUSG00000092124	1.09031	0.592646	3.57598	0.0586207	0.230442	RIKEN cDNA B930094E09 gene [Source:MGI Symbol;Acc:MGI:3603750]	B930094E09Rik	0.30968	1.44136	0.994202	1.67285	2.01191	1.67802
ENSMUSG00000018500	1.09019	1.20275	4.28063	0.038549	0.184578	adenosine A2b receptor [Source:MGI Symbol;Acc:MGI:99403]	Adora2b	0.619361	1.69203	1.78956	3.98022	3.01786	1.81049
ENSMUSG00000041774	1.08759	1.26977	3.83167	0.0502928	0.212286	YdjC homolog (bacterial) [Source:MGI Symbol;Acc:MGI:1916351]	Ydjc	1.9355	0.376006	2.51865	3.40338	3.14361	2.29623
ENSMUSG00000043372	1.07208	0.490092	0.770003	0.380216	0.624463	hexamethylene bis-acetamide inducible 2 [Source:MGI Symbol;Acc:MGI:1918309]	Hexim2	0.30968	0.438674	1.9884	2.48043	2.45201	0.132475
ENSMUSG00000051517	1.06805	0.229144	1.05893	0.303459	0.556461	Rho guanine nucleotide exchange factor (GEF) 39 [Source:MGI Symbol;Acc:MGI:3036286]	Arhgef39	0	0.56401	1.45816	2.42274	0.440105	1.19227
ENSMUSG00000096916	1.06583	1.39868	4.49486	0.0339969	0.173235	zinc finger protein 850 [Source:MGI Symbol;Acc:MGI:3036281]	Zfp850	0.929041	3.13339	0.795362	1.32674	3.64659	4.7691
ENSMUSG00000062127	1.06484	5.18436	6.72927	0.00948434	0.0897905	CTTNBP2 N-terminal like [Source:MGI Symbol;Acc:MGI:1933137]	Cttnbp2nl	6.89039	38.6033	33.604	51.4544	37.4718	48.7508
ENSMUSG00000060568	1.06342	2.38939	8.26437	0.00404306	0.0584709	family with sequence similarity 78, member B [Source:MGI Symbol;Acc:MGI:2443050]	Fam78b	4.02584	4.95075	1.3256	9.80634	5.09265	5.25484
ENSMUSG00000041566	1.06302	-0.161698	2.42847	0.119149	0.337679	testis-specific serine kinase 1 [Source:MGI Symbol;Acc:MGI:1347557]	Tssk1	0.619361	0.250671	0.596521	1.49979	0.691594	0.883166
ENSMUSG00000057899	1.06199	-0.0511855	2.34681	0.12554	0.347302	adhesion G protein-coupled receptor F2 [Source:MGI Symbol;Acc:MGI:2182728]	Adgrf2	0.541941	0.81468	0.265121	1.67285	0.88021	0.79485
ENSMUSG00000064141	1.06015	1.37191	7.39576	0.00653776	0.0734341	zinc finger protein 69 [Source:MGI Symbol;Acc:MGI:107794]	Zfp69	2.01292	1.62936	1.06048	4.7878	2.82925	2.34039
ENSMUSG00000019853	1.05944	-0.509425	1.35055	0.245182	0.498805	heme binding protein 2 [Source:MGI Symbol;Acc:MGI:1860084]	Hebp2	0	0.313339	1.06048	0.461475	0.628722	0.883166
ENSMUSG00000039294	1.05918	3.39128	11.1863	0.000824025	0.0273326	cDNA sequence BC017643 [Source:MGI Symbol;Acc:MGI:2384959]	BC017643	12.0775	4.88808	4.50705	12.1137	14.2091	14.219
ENSMUSG00000038692	1.05775	-0.388606	1.52881	0.216291	0.465292	homeobox B4 [Source:MGI Symbol;Acc:MGI:96185]	Hoxb4	1.00646	0.501342	0	1.38442	0.565849	0.441583
ENSMUSG00000037466	1.05718	0.676648	4.22744	0.0397754	0.187257	RIKEN cDNA 4930427A07 gene [Source:MGI Symbol;Acc:MGI:2144738]	4930427A07Rik	1.47098	0.689345	0.729082	2.36506	1.50893	1.94297
ENSMUSG00000039738	1.05669	3.57495	21.7172	3.15951e-06	0.000862414	SLX4 structure-specific endonuclease subunit homolog (S. cerevisiae) [Source:MGI Symbol;Acc:MGI:106299]	Slx4	7.81943	8.83615	6.09777	20.0741	14.0205	13.5566
ENSMUSG00000030406	1.0566	-0.680887	1.13391	0.286942	0.541905	gastric inhibitory polypeptide receptor [Source:MGI Symbol;Acc:MGI:1352753]	Gipr	0	0.81468	0.331401	0.519159	0.502977	0.706533
ENSMUSG00000044139	1.04744	-0.142427	1.7063	0.191466	0.434537	protease, serine 53 [Source:MGI Symbol;Acc:MGI:2652890]	Prss53	0.774201	0	0.662802	1.90358	0	1.19227
ENSMUSG00000050493	1.04564	-0.499443	1.12419	0.289018	0.54364	family with sequence similarity 167, member B [Source:MGI Symbol;Acc:MGI:2668032]	Fam167b	0.3871	0	1.06048	0.576843	0.691594	0.750691
ENSMUSG00000055200	1.04494	1.98265	7.77207	0.00530601	0.0665894	SERTA domain containing 3 [Source:MGI Symbol;Acc:MGI:2180697]	Sertad3	1.39356	2.63204	3.44657	5.99917	4.08669	5.03405
ENSMUSG00000079014	1.04355	1.38032	5.15293	0.0232072	0.141814	serine (or cysteine) peptidase inhibitor, clade A, member 3I [Source:MGI Symbol;Acc:MGI:2182841]	Serpina3i	0.30968	2.00537	2.85005	2.07664	2.7035	4.45999
ENSMUSG00000062438	1.03894	0.83416	3.97689	0.0461285	0.202133	a disintegrin and metallopeptidase domain 1b [Source:MGI Symbol;Acc:MGI:2429506]	Adam1b	1.23872	0.689345	1.06048	4.15327	1.44606	1.28059
ENSMUSG00000040536	1.03619	-0.908599	0.878842	0.348519	0.596897	N-terminal EF-hand calcium binding protein 1 [Source:MGI Symbol;Acc:MGI:1916602]	Necab1	0.3871	0	0.530241	0.922949	0.440105	0.220792
ENSMUSG00000050587	1.03537	0.221275	2.15797	0.141832	0.36966	leucine rich repeat containing 4C [Source:MGI Symbol;Acc:MGI:2442636]	Lrrc4c	0.464521	0.877348	0.463961	2.76885	0.88021	0.706533
ENSMUSG00000047959	1.03422	-0.199088	1.49765	0.221033	0.471297	potassium voltage-gated channel, shaker-related subfamily, member 3 [Source:MGI Symbol;Acc:MGI:96660]	Kcna3	0.30968	1.06535	0.19884	1.32674	0.565849	0.883166
ENSMUSG00000042377	1.03139	-0.0671522	1.19848	0.273626	0.529784	family with sequence similarity 83, member G [Source:MGI Symbol;Acc:MGI:1916890]	Fam83g	0	1.12802	0.729082	1.32674	0.943082	0.750691
ENSMUSG00000079445	1.02788	0.0278078	2.12057	0.145332	0.374094	UDP-GlcNAc:betaGal beta-1,3-N-acetylglucosaminyltransferase 7 [Source:MGI Symbol;Acc:MGI:2384394]	B3gnt7	0.696781	0.250671	0.861642	1.32674	1.38319	0.839008
ENSMUSG00000051650	1.02769	4.38522	10.2145	0.00139341	0.0349072	UDP-GlcNAc:betaGal beta-1,3-N-acetylglucosaminyltransferase 2 [Source:MGI Symbol;Acc:MGI:1889505]	B3gnt2	19.5873	19.3643	5.16985	34.899	20.3077	24.9936
ENSMUSG00000038793	1.02432	0.438106	2.95061	0.085845	0.282375	left right determination factor 1 [Source:MGI Symbol;Acc:MGI:107405]	Lefty1	0.541941	1.19069	0.662802	1.78821	1.25744	1.72217
ENSMUSG00000045763	1.01868	2.66575	13.8818	0.000194679	0.0126174	brain abundant, membrane attached signal protein 1 [Source:MGI Symbol;Acc:MGI:1917600]	Basp1	4.2581	2.63204	5.36869	7.78738	6.0986	10.6863
ENSMUSG00000072066	1.01474	1.07241	4.55032	0.0329125	0.169638	RIKEN cDNA 6720489N17 gene [Source:MGI Symbol;Acc:MGI:2443901]	6720489N17Rik	1.39356	0.56401	2.12096	2.76885	2.13765	2.69366
ENSMUSG00000045551	1.00953	-0.562094	1.31275	0.251898	0.506475	formyl peptide receptor 1 [Source:MGI Symbol;Acc:MGI:107443]	Fpr1	0	0.250671	0.994202	0.288422	0.440105	1.14812
ENSMUSG00000048148	1.00776	0.199635	2.66239	0.102746	0.310991	NACHT and WD repeat domain containing 1 [Source:MGI Symbol;Acc:MGI:2442268]	Nwd1	1.00646	0.626677	0.331401	2.36506	1.38319	0.485741
ENSMUSG00000016510	1.00737	4.38843	24.2282	8.55692e-07	0.000303008	mitochondrial translational initiation factor 3 [Source:MGI Symbol;Acc:MGI:1923616]	Mtif3	12.5421	12.6589	15.9072	34.2068	25.0231	24.1988
ENSMUSG00000059479	1.00541	2.37735	10.7357	0.0010509	0.0306656	UDP-GlcNAc:betaGal beta-1,3-N-acetylglucosaminyltransferase 8 [Source:MGI Symbol;Acc:MGI:2385269]	B3gnt8	2.94196	3.25872	3.71169	8.42191	6.41296	5.43147
ENSMUSG00000028718	1.00513	0.773191	3.98119	0.0460109	0.20182	Scl/Tal1 interrupting locus [Source:MGI Symbol;Acc:MGI:107477]	Stil	2.01292	0.501342	0.795362	3.05727	1.32032	1.76633
ENSMUSG00000066456	1.00488	2.47439	12.4951	0.000408017	0.0182665	high mobility group nucleosomal binding domain 3 [Source:MGI Symbol;Acc:MGI:2138069]	Hmgn3	3.63874	3.57206	3.44657	7.32591	6.03573	8.16929
ENSMUSG00000030257	1.00376	1.836	8.59821	0.00336493	0.0538965	SLIT-ROBO Rho GTPase activating protein 3 [Source:MGI Symbol;Acc:MGI:2152938]	Srgap3	3.79358	1.81736	1.39188	6.40296	4.58967	2.69366
ENSMUSG00000048004	1.00314	-0.376935	0.960316	0.327107	0.579017	transmembrane protein 196 [Source:MGI Symbol;Acc:MGI:2685374]	Tmem196	0	0.626677	0.795362	1.096	0.88021	0.441583
ENSMUSG00000009731	1.00242	0.49657	1.99496	0.157823	0.3915	potassium voltage-gated channel, Shal-related family, member 1 [Source:MGI Symbol;Acc:MGI:96671]	Kcnd1	1.70324	1.12802	0.13256	1.44211	1.63468	1.63386
ENSMUSG00000074635	1.00095	0.707066	3.02078	0.0822041	0.274475	RIKEN cDNA 3110070M22 gene [Source:MGI Symbol;Acc:MGI:1914554]	3110070M22Rik	0.851621	0.752013	1.3256	2.24969	2.7035	1.14812
ENSMUSG00000032593	1.00057	1.62836	7.7505	0.00536977	0.0667489	adhesion molecule with Ig like domain 3 [Source:MGI Symbol;Acc:MGI:2444854]	Amigo3	2.47744	2.31871	1.12676	5.42233	3.70946	2.6495
ENSMUSG00000078157	1.00024	1.53192	6.73419	0.00945822	0.0897905	RIKEN cDNA 4931440F15 gene [Source:MGI Symbol;Acc:MGI:2441689]	4931440F15Rik	2.16776	1.56669	1.59072	5.24927	3.96095	2.03128
ENSMUSG00000043811	0.999426	1.29392	4.34605	0.037095	0.180896	reticulon 4 receptor [Source:MGI Symbol;Acc:MGI:2136886]	Rtn4r	1.85808	1.25335	1.06048	4.90317	1.00595	3.53266
ENSMUSG00000046908	0.999166	-0.114835	2.24933	0.133672	0.358849	leukotriene B4 receptor 1 [Source:MGI Symbol;Acc:MGI:1309472]	Ltb4r1	0.851621	0.250671	0.530241	1.32674	0.754466	1.01564
ENSMUSG00000054836	0.996209	1.30262	6.00692	0.0142499	0.111225	elongator acetyltransferase complex subunit 6 [Source:MGI Symbol;Acc:MGI:1919349]	Elp6	1.08388	1.88003	1.657	2.88422	2.89212	3.35603
ENSMUSG00000057948	0.993507	-0.193255	1.80473	0.179142	0.42048	unc-13 homolog D (C. elegans) [Source:MGI Symbol;Acc:MGI:1917700]	Unc13d	0.23226	0.501342	0.596521	0.749896	0.440105	1.67802
ENSMUSG00000074899	0.991869	0.983083	3.33296	0.0679044	0.248723	spectrin beta, non-erythrocytic 5 [Source:MGI Symbol;Acc:MGI:2685200]	Sptbn5	0.464521	0.877348	2.45237	2.71116	1.19457	3.04692
ENSMUSG00000028850	0.991861	2.68549	9.72367	0.0018191	0.039657	G patch domain containing 3 [Source:MGI Symbol;Acc:MGI:2442492]	Gpatch3	2.78712	5.70276	4.17565	9.9217	7.6704	7.24196
ENSMUSG00000020911	0.99157	-1.67328	0.381901	0.536587	0.7463	keratin 19 [Source:MGI Symbol;Acc:MGI:96693]	Krt19	0.619361	0	0	0.346106	0.314361	0
ENSMUSG00000032258	0.991541	2.0101	8.45802	0.00363438	0.0552409	Leber congenital amaurosis 5 (human) [Source:MGI Symbol;Acc:MGI:1923032]	Lca5	2.86454	1.12802	3.84425	7.26823	2.7035	5.299
ENSMUSG00000030376	0.99088	1.53004	5.24711	0.0219832	0.138084	solute carrier family 8 (sodium/calcium exchanger), member 2 [Source:MGI Symbol;Acc:MGI:107996]	Slc8a2	2.63228	3.38406	0.265121	4.49938	4.27531	1.5897
ENSMUSG00000050106	0.99056	0.969222	2.79045	0.0948274	0.299528	transmembrane channel-like gene family 8 [Source:MGI Symbol;Acc:MGI:2669037]	Tmc8	0.851621	2.69471	0.463961	1.61516	2.20053	2.87029
ENSMUSG00000074063	0.990143	1.29425	3.67114	0.0553622	0.223795	oxidative stress induced growth inhibitor 1 [Source:MGI Symbol;Acc:MGI:1919089]	Osgin1	3.4839	1.56669	0.397681	3.05727	3.08074	2.42871
ENSMUSG00000038178	0.989886	4.0775	16.413	5.09334e-05	0.00583292	solute carrier family 43, member 2 [Source:MGI Symbol;Acc:MGI:2442746]	Slc43a2	13.6259	11.0922	8.61642	19.6704	18.1072	28.8795
ENSMUSG00000109864	0.984378	1.18004	5.22913	0.0222117	0.138778	EP300 interacting inhibitor of differentiation 3 [Source:MGI Symbol;Acc:MGI:1913591]	Eid3	1.78066	0.940016	1.39188	4.67243	1.76042	2.16376
ENSMUSG00000066838	0.984147	1.50186	4.04485	0.0443062	0.198445	zinc finger protein 772 [Source:MGI Symbol;Acc:MGI:2385265]	Zfp772	0.774201	1.19069	4.17565	3.34569	3.26935	3.26771
ENSMUSG00000033985	0.983993	2.02535	9.71021	0.00183247	0.0398821	testis-specific kinase 2 [Source:MGI Symbol;Acc:MGI:2385204]	Tesk2	3.63874	2.1307	2.18725	6.28759	4.27531	4.94573
ENSMUSG00000066607	0.982955	4.64091	28.0983	1.15308e-07	7.55386e-05	RIKEN cDNA 6030419C18 gene [Source:MGI Symbol;Acc:MGI:2442108]	6030419C18Rik	16.8776	15.9803	16.5038	40.7251	26.0919	32.3239
ENSMUSG00000043999	0.981498	0.150229	1.17085	0.279227	0.535485	G protein-coupled receptor 75 [Source:MGI Symbol;Acc:MGI:2441843]	Gpr75	0.851621	1.7547	0	1.67285	0.817338	0.79485
ENSMUSG00000034463	0.980733	3.01781	13.1268	0.000291107	0.0151352	scavenger receptor class A, member 3 [Source:MGI Symbol;Acc:MGI:2444418]	Scara3	4.56779	6.89345	4.57333	12.2868	9.4937	9.67067
ENSMUSG00000069893	0.978104	4.31473	27.7937	1.34967e-07	7.68845e-05	RIKEN cDNA 9930111J21 gene 1 [Source:MGI Symbol;Acc:MGI:3041173]	9930111J21Rik1	16.7227	10.5282	12.063	37.0333	18.7988	23.1831
ENSMUSG00000038618	0.973202	0.409239	2.03354	0.153862	0.386077	Ras association (RalGDS/AF-6) domain family (N-terminal) member 7 [Source:MGI Symbol;Acc:MGI:1914235]	Rassf7	1.00646	0.313339	1.12676	2.30737	1.76042	0.750691
ENSMUSG00000059395	0.972176	-0.246624	1.58282	0.208354	0.45528	NFKB activating protein-like [Source:MGI Symbol;Acc:MGI:1913957]	Nkapl	0.3871	0.313339	0.530241	1.90358	0.314361	0.750691
ENSMUSG00000078768	0.970991	0.867114	3.56236	0.0591035	0.231275	zinc finger protein 566 [Source:MGI Symbol;Acc:MGI:1919806]	Zfp566	1.23872	1.37869	0.729082	2.88422	1.44606	2.29623
ENSMUSG00000004633	0.970983	1.00507	4.27414	0.0386965	0.184835	chimerin 2 [Source:MGI Symbol;Acc:MGI:1917243]	Chn2	0.929041	1.06535	1.78956	2.76885	2.20053	2.34039
ENSMUSG00000073096	0.970049	1.83121	6.77412	0.0092489	0.0884343	leucine rich repeat containing 61 [Source:MGI Symbol;Acc:MGI:2652848]	Lrrc61	1.9355	3.8854	1.3256	3.28801	5.34413	4.54831
ENSMUSG00000000884	0.967755	1.79123	5.86045	0.0154849	0.115734	guanine nucleotide binding protein (G protein), beta polypeptide 1-like [Source:MGI Symbol;Acc:MGI:1338057]	Gnb1l	1.08388	3.19605	2.58493	4.84548	4.5268	3.53266
ENSMUSG00000050830	0.963425	1.52081	4.36971	0.0365831	0.17972	von Willebrand factor C domain containing 2 [Source:MGI Symbol;Acc:MGI:2442987]	Vwc2	2.09034	1.9427	0.596521	8.53728	2.7035	0.618216
ENSMUSG00000032344	0.962795	1.53643	6.70354	0.00962215	0.0905021	Mab-21 domain containing 1 [Source:MGI Symbol;Acc:MGI:2442261]	Mb21d1	1.85808	1.12802	2.65121	3.17264	3.01786	4.50415
ENSMUSG00000025578	0.962499	2.42438	7.88774	0.00497711	0.0639314	chromobox 8 [Source:MGI Symbol;Acc:MGI:1353589]	Cbx8	2.55486	4.13607	3.64541	9.80634	5.78424	5.25484
ENSMUSG00000029557	0.961047	3.31551	13.1425	0.000288675	0.0150974	mitochondrial rRNA methyltransferase 2 [Source:MGI Symbol;Acc:MGI:1915267]	Mrm2	5.96135	6.51744	7.0257	17.1322	13.0774	9.05245
ENSMUSG00000066319	0.960645	0.848399	3.99704	0.0455801	0.200907	receptor transporter protein 3 [Source:MGI Symbol;Acc:MGI:2446841]	Rtp3	1.39356	1.62936	0.463961	2.48043	3.01786	1.10396
ENSMUSG00000066677	0.958168	-0.663647	0.866984	0.351792	0.599684	interferon activated gene 208 [Source:MGI Symbol;Acc:MGI:2442822]	Ifi208	0.929041	0.250671	0	0.865265	1.19457	0
ENSMUSG00000071291	0.955732	2.95571	5.58622	0.0181023	0.12569	zinc finger protein 58 [Source:MGI Symbol;Acc:MGI:99205]	Zfp58	2.24518	6.89345	6.6943	13.4404	8.11051	8.03681
ENSMUSG00000049950	0.951368	2.0349	7.3605	0.00666724	0.0740416	ribonuclease P/MRP 38 subunit [Source:MGI Symbol;Acc:MGI:2443607]	Rpp38	2.24518	2.00537	3.91053	5.99917	4.90403	4.54831
ENSMUSG00000059555	0.949635	3.68342	19.0632	1.26463e-05	0.00236702	torsin family 4, member A [Source:MGI Symbol;Acc:MGI:2442720]	Tor4a	7.97427	8.96148	8.81526	19.9588	15.4037	14.8813
ENSMUSG00000051278	0.946335	2.92451	12.2096	0.000475437	0.0201051	zinc finger, GRF-type containing 1 [Source:MGI Symbol;Acc:MGI:1918893]	Zgrf1	5.88393	4.76275	4.04309	15.5748	7.35604	6.97701
ENSMUSG00000050105	0.943773	3.90815	9.74208	0.00180097	0.039657	glycine/arginine rich protein 1 [Source:MGI Symbol;Acc:MGI:1919940]	Grrp1	6.27103	11.8442	12.1955	26.3617	18.1072	14.219
ENSMUSG00000024397	0.94302	1.25246	4.10607	0.0427295	0.194592	allograft inflammatory factor 1 [Source:MGI Symbol;Acc:MGI:1343098]	Aif1	0.619361	1.19069	3.11517	2.48043	2.32627	3.48851
ENSMUSG00000035104	0.942931	1.69985	7.05411	0.00790837	0.0806346	eva-1 homolog A (C. elegans) [Source:MGI Symbol;Acc:MGI:2385247]	Eva1a	1.78066	2.25604	2.25353	4.67243	3.58371	3.93009
ENSMUSG00000079339	0.941644	2.48352	10.903	0.000960091	0.0297904	interferon induced protein with tetratricpeptide repeats 1B like 1 [Source:MGI Symbol;Acc:MGI:3650685]	Ifit1bl1	3.4839	4.01073	3.57913	8.30654	6.41296	6.71206
ENSMUSG00000024366	0.940837	-0.222529	1.93704	0.16399	0.400186	glial cell line derived neurotrophic factor family receptor alpha 3 [Source:MGI Symbol;Acc:MGI:1201403]	Gfra3	0.3871	0.626677	0.463961	0.922949	1.19457	0.750691
ENSMUSG00000028979	0.940415	-0.941896	0.605566	0.436462	0.672258	mannan-binding lectin serine peptidase 2 [Source:MGI Symbol;Acc:MGI:1330832]	Masp2	0	0	0.994202	0.230737	0	0.971483
ENSMUSG00000003882	0.939926	-0.108781	1.86541	0.172002	0.411685	interleukin 7 receptor [Source:MGI Symbol;Acc:MGI:96562]	Il7r	0.851621	0.501342	0.331401	0.865265	1.32032	0.927324
ENSMUSG00000052135	0.938899	0.558614	3.03328	0.0815727	0.273482	forkhead box O6 [Source:MGI Symbol;Acc:MGI:2676586]	Foxo6	0.851621	0.877348	0.927922	2.42274	1.32032	1.54554
ENSMUSG00000041945	0.937043	1.11659	4.15385	0.0415399	0.191303	major facilitator superfamily domain containing 9 [Source:MGI Symbol;Acc:MGI:2443548]	Mfsd9	1.08388	1.12802	1.9884	2.59579	3.08074	2.25207
ENSMUSG00000020669	0.933132	-0.876082	0.93686	0.333087	0.583514	Sh3 domain YSC-like 1 [Source:MGI Symbol;Acc:MGI:1346118]	Sh3yl1	0.696781	0.376006	0	0.519159	0.817338	0.220792
ENSMUSG00000054855	0.932193	2.11782	8.87342	0.00289352	0.0499494	Rho family GTPase 1 [Source:MGI Symbol;Acc:MGI:2444878]	Rnd1	1.78066	2.44404	4.24193	4.09559	3.8352	8.30176
ENSMUSG00000092486	0.927279	0.00721644	1.65248	0.198622	0.444011	RIKEN cDNA 2610524H06 gene [Source:MGI Symbol;Acc:MGI:2447819]	2610524H06Rik	0.23226	0.313339	1.45816	1.096	0.691594	1.32475
ENSMUSG00000059689	0.926109	3.44233	9.13829	0.00250315	0.0464729	zinc finger protein 637 [Source:MGI Symbol;Acc:MGI:2448537]	Zfp637	8.36137	9.08682	4.57333	18.5744	8.73923	14.7047
ENSMUSG00000031910	0.923534	1.23133	4.40632	0.035806	0.178265	hyaluronan synthase 3 [Source:MGI Symbol;Acc:MGI:109599]	Has3	1.39356	2.25604	0.927922	4.0379	2.76638	1.85465
ENSMUSG00000027398	0.92155	0.569479	2.78873	0.0949294	0.299558	interleukin 1 beta [Source:MGI Symbol;Acc:MGI:96543]	Il1b	0.464521	1.44136	0.927922	1.61516	2.38914	1.23643
ENSMUSG00000050075	0.921012	-0.490338	0.918827	0.337783	0.587188	G protein-coupled receptor 171 [Source:MGI Symbol;Acc:MGI:2442043]	Gpr171	0	0.313339	1.12676	0.692212	0.377233	0.883166
ENSMUSG00000023940	0.920924	0.313732	1.23574	0.266294	0.521366	shugoshin 1 [Source:MGI Symbol;Acc:MGI:1919665]	Sgo1	0	0.56401	2.31981	1.096	0.628722	1.85465
ENSMUSG00000037129	0.918899	-0.329206	0.924871	0.336199	0.586134	transmembrane protease, serine 13 [Source:MGI Symbol;Acc:MGI:2682935]	Tmprss13	0.3871	0.877348	0.13256	0.980634	0.314361	1.14812
ENSMUSG00000071203	0.918069	2.10836	7.44045	0.00637739	0.0729752	NLR family, apoptosis inhibitory protein 5 [Source:MGI Symbol;Acc:MGI:1298220]	Naip5	4.02584	1.9427	2.58493	7.90275	5.53275	3.13524
ENSMUSG00000047798	0.916518	1.00658	3.92862	0.0474709	0.205201	CD300 molecule like family member F [Source:MGI Symbol;Acc:MGI:2442359]	Cd300lf	1.23872	1.00268	1.45816	1.61516	2.01191	3.62098
ENSMUSG00000025255	0.914827	2.19611	7.93589	0.00484637	0.0633782	zinc finger homeodomain 4 [Source:MGI Symbol;Acc:MGI:2137668]	Zfhx4	4.02584	2.50671	2.12096	10.8447	4.08669	3.09108
ENSMUSG00000026343	0.912502	1.44451	4.00732	0.045303	0.200491	G protein-coupled receptor 39 [Source:MGI Symbol;Acc:MGI:1918361]	Gpr39	3.32906	1.19069	0.994202	3.63411	1.76042	4.41583
ENSMUSG00000079511	0.910554	4.02205	19.5514	9.79275e-06	0.00203658	predicted gene 42688 [Source:MGI Symbol;Acc:MGI:5662825]	Gm42688	6.96781	19.239	8.41758	16.8438	29.2356	15.7645
ENSMUSG00000038010	0.910247	0.6697	2.33004	0.126898	0.349364	coiled-coil domain containing 138 [Source:MGI Symbol;Acc:MGI:1923388]	Ccdc138	1.31614	1.31602	0.397681	2.9419	1.00595	1.67802
ENSMUSG00000026475	0.907467	0.832784	0.810228	0.368053	0.614989	regulator of G-protein signaling 16 [Source:MGI Symbol;Acc:MGI:108407]	Rgs16	0	1.37869	2.12096	3.23032	0.565849	2.29623
ENSMUSG00000047604	0.905586	1.66523	4.6393	0.0312477	0.165417	frequently rearranged in advanced T cell lymphomas 2 [Source:MGI Symbol;Acc:MGI:2673967]	Frat2	1.85808	1.25335	3.38029	4.90317	3.70946	3.04692
ENSMUSG00000018486	0.904243	0.996074	2.38887	0.122202	0.342552	wingless-type MMTV integration site family, member 9B [Source:MGI Symbol;Acc:MGI:1197020]	Wnt9b	1.08388	1.81736	0.795362	2.99959	1.06883	3.09108
ENSMUSG00000090673	0.904059	4.55597	18.5776	1.63128e-05	0.00267163	predicted gene 340 [Source:MGI Symbol;Acc:MGI:2685186]	Gm340	16.8776	18.0483	12.6595	45.1091	25.2117	22.2116
ENSMUSG00000034538	0.90339	1.87953	7.58376	0.00588964	0.0694965	zinc finger protein 418 [Source:MGI Symbol;Acc:MGI:2444763]	Zfp418	3.40648	2.50671	1.52444	6.34528	4.40105	3.09108
ENSMUSG00000089929	0.901702	1.24574	2.92833	0.0870374	0.284451	B cell leukemia/lymphoma 2 related protein A1b [Source:MGI Symbol;Acc:MGI:1278326]	Bcl2a1b	0.3871	0.81468	4.30821	2.24969	1.50893	3.84177
ENSMUSG00000060708	0.899991	3.58711	10.5705	0.00114904	0.0323062	biogenesis of lysosomal organelles complex-1, subunit 4, cappuccino [Source:MGI Symbol;Acc:MGI:1929230]	Bloc1s4	6.50329	9.40016	8.21874	22.3815	13.5804	10.9954
ENSMUSG00000035235	0.899207	2.79967	10.4883	0.00120133	0.032729	tripartite motif-containing 13 [Source:MGI Symbol;Acc:MGI:1913847]	Trim13	4.80005	4.01073	5.36869	10.3255	9.17934	7.15365
ENSMUSG00000058420	0.897708	1.06645	4.06596	0.0437558	0.197065	synaptotagmin XVII [Source:MGI Symbol;Acc:MGI:104966]	Syt17	2.09034	1.37869	0.596521	4.15327	2.76638	0.927324
ENSMUSG00000026646	0.897327	0.608819	2.87242	0.0901095	0.290919	suppressor of variegation 3-9 homolog 2 (Drosophila) [Source:MGI Symbol;Acc:MGI:1890396]	Suv39h2	0.929041	0.752013	1.06048	1.78821	1.00595	2.56118
ENSMUSG00000050619	0.895942	3.89874	14.2548	0.000159654	0.0110677	zinc finger SCAN domains 29 [Source:MGI Symbol;Acc:MGI:2139317]	Zscan29	7.97427	12.4709	10.406	23.3045	16.6611	17.5308
ENSMUSG00000021495	0.895245	5.19222	24.295	8.26548e-07	0.000303008	family with sequence similarity 193, member B [Source:MGI Symbol;Acc:MGI:2385851]	Fam193b	31.5874	24.3151	18.8236	71.7016	34.5168	37.4021
ENSMUSG00000021965	0.895134	-0.474425	1.09401	0.295585	0.549951	spindle and kinetochore associated complex subunit 3 [Source:MGI Symbol;Acc:MGI:3041235]	Ska3	0.3871	0	1.06048	0.634528	0.251489	1.10396
ENSMUSG00000035868	0.891903	1.2546	3.57764	0.0585624	0.230416	zinc finger protein 983 [Source:MGI Symbol;Acc:MGI:1920479]	Zfp983	1.23872	1.31602	1.9884	4.49938	2.51489	1.89881
ENSMUSG00000054381	0.89117	2.74538	8.9249	0.00281309	0.0491429	zinc finger protein 747 [Source:MGI Symbol;Acc:MGI:2443581]	Zfp747	3.63874	4.57474	5.30241	10.96	6.28722	8.34592
ENSMUSG00000062861	0.889701	2.89429	4.97222	0.0257576	0.14959	zinc finger protein 28 [Source:MGI Symbol;Acc:MGI:99175]	Zfp28	4.33552	4.13607	4.10937	21.6893	4.90403	4.45999
ENSMUSG00000048368	0.889586	-0.0026664	1.75	0.185876	0.427808	osteomodulin [Source:MGI Symbol;Acc:MGI:1350918]	Omd	0.464521	0.313339	0.861642	0.519159	0.691594	2.07544
ENSMUSG00000049409	0.88949	-0.465578	0.997999	0.317795	0.570405	prokineticin receptor 1 [Source:MGI Symbol;Acc:MGI:1929676]	Prokr1	0.851621	0	0.530241	1.61516	0.314361	0.353266
ENSMUSG00000035561	0.889476	4.14629	12.8581	0.000336031	0.0166139	aldehyde dehydrogenase 1 family, member B1 [Source:MGI Symbol;Acc:MGI:1919785]	Aldh1b1	9.44525	11.1549	16.4375	28.0346	21.2508	18.8556
ENSMUSG00000050304	0.887711	-0.0138374	1.5923	0.206997	0.453891	solute carrier family 25 (mitochondrial carrier, ornithine transporter) member 2 [Source:MGI Symbol;Acc:MGI:2137907]	Slc25a2	0.30968	0.689345	0.795362	1.26906	1.44606	0.662375
ENSMUSG00000044534	0.886539	2.0156	4.99466	0.0254257	0.148585	atypical chemokine receptor 2 [Source:MGI Symbol;Acc:MGI:1891697]	Ackr2	1.39356	4.32407	2.71749	5.82612	4.33818	4.59246
ENSMUSG00000035873	0.883601	0.854849	3.48289	0.0620065	0.236758	PRKC, apoptosis, WT1, regulator [Source:MGI Symbol;Acc:MGI:2149961]	Pawr	1.31614	0.940016	1.25932	2.07664	2.2634	2.1196
ENSMUSG00000090963	0.883484	0.391274	1.77218	0.183112	0.424364	predicted gene, 17655 [Source:MGI Symbol;Acc:MGI:4937289]	Gm17655	0.929041	0.438674	0.994202	0.634528	2.13765	1.85465
ENSMUSG00000054863	0.882434	2.17113	7.32522	0.00679935	0.074813	family with sequence similarity 19, member A5 [Source:MGI Symbol;Acc:MGI:2146182]	Fam19a5	1.78066	2.88272	4.70589	5.13391	5.02977	6.3588
ENSMUSG00000035506	0.88082	-0.0979274	1.78842	0.181119	0.422961	solute carrier family 12 (potassium/chloride transporters), member 8 [Source:MGI Symbol;Acc:MGI:2443672]	Slc12a8	0.541941	0.752013	0.397681	0.807581	1.32032	0.971483
ENSMUSG00000000732	0.880611	3.87486	11.6501	0.000641985	0.023828	icos ligand [Source:MGI Symbol;Acc:MGI:1354701]	Icosl	8.59363	13.8496	7.75478	27.1116	17.0384	12.6734
ENSMUSG00000032776	0.880369	-0.0685256	1.62657	0.202179	0.448518	multiple C2 domains, transmembrane 2 [Source:MGI Symbol;Acc:MGI:2685335]	Mctp2	0.15484	0.752013	0.795362	0.346106	1.82329	1.01564
ENSMUSG00000037692	0.877501	4.87105	14.3635	0.000150694	0.0109047	AT hook, DNA binding motif, containing 1 [Source:MGI Symbol;Acc:MGI:2444218]	Ahdc1	17.0324	38.1646	5.16985	52.4927	55.076	6.97701
ENSMUSG00000078994	0.872206	-0.029931	0.760661	0.383122	0.626909	zinc finger protein 429 [Source:MGI Symbol;Acc:MGI:1920057]	Zfp429	0	0	2.38609	0	0.314361	2.1196
ENSMUSG00000004267	0.871628	0.562125	2.50316	0.113618	0.328036	enolase 2, gamma neuronal [Source:MGI Symbol;Acc:MGI:95394]	Eno2	1.08388	1.50403	0.397681	1.49979	2.2634	1.32475
ENSMUSG00000042529	0.871367	5.91046	23.8181	1.05883e-06	0.000365073	potassium inwardly-rectifying channel, subfamily J, member 12 [Source:MGI Symbol;Acc:MGI:108495]	Kcnj12	49.4714	52.8916	24.3248	111.388	75.5723	46.3662
ENSMUSG00000036768	0.87071	1.39156	3.66763	0.0554791	0.223795	kinesin family member 15 [Source:MGI Symbol;Acc:MGI:1098258]	Kif15	1.31614	1.06535	2.51865	5.30696	1.25744	3.22356
ENSMUSG00000071477	0.870051	4.08192	15.9862	6.3805e-05	0.00649843	zinc finger protein 777 [Source:MGI Symbol;Acc:MGI:1919556]	Zfp777	11.2259	15.2909	9.08038	27.5731	19.8676	17.5308
ENSMUSG00000072647	0.868058	3.05247	9.63314	0.00191097	0.0406454	a disintegrin and metallopeptidase domain 1a [Source:MGI Symbol;Acc:MGI:2429504]	Adam1a	6.34845	5.20142	4.77217	17.7668	8.86498	5.96137
ENSMUSG00000063605	0.865699	3.22717	10.5434	0.00116601	0.0326433	coiled-coil domain containing 102A [Source:MGI Symbol;Acc:MGI:2686927]	Ccdc102a	5.57425	7.7708	5.96521	15.7478	10.3739	9.71483
ENSMUSG00000030493	0.865448	0.967664	3.67667	0.055179	0.223504	Fanconi anemia core complex associated protein 24 [Source:MGI Symbol;Acc:MGI:2142208]	Faap24	1.85808	0.877348	1.12676	3.17264	1.5718	2.25207
ENSMUSG00000019773	0.864717	1.36554	3.28828	0.0697763	0.251655	F-box protein 5 [Source:MGI Symbol;Acc:MGI:1914391]	Fbxo5	0.851621	1.81736	2.45237	4.26864	2.13765	2.91445
ENSMUSG00000074283	0.862128	1.99013	6.21653	0.0126563	0.104836	zinc finger protein 109 [Source:MGI Symbol;Acc:MGI:1929099]	Zfp109	1.9355	2.94538	3.18145	5.8838	4.02382	4.81326
ENSMUSG00000056592	0.861948	2.05335	7.21311	0.0072373	0.077598	zinc finger protein 658 [Source:MGI Symbol;Acc:MGI:2652821]	Zfp658	4.10326	2.1307	2.18725	8.01812	4.71541	3.00276
ENSMUSG00000045106	0.861635	0.0888438	1.34446	0.24625	0.500134	coiled-coil domain containing 73 [Source:MGI Symbol;Acc:MGI:3606488]	Ccdc73	0.15484	0.877348	1.06048	1.38442	1.1317	0.927324
ENSMUSG00000040957	0.861011	3.28355	10.8819	0.00097108	0.0297904	CDK5 and Abl enzyme substrate 1 [Source:MGI Symbol;Acc:MGI:1927065]	Cables1	5.34199	7.58279	7.3571	14.8249	12.1343	10.1564
ENSMUSG00000021886	0.860743	1.3982	3.35214	0.0671177	0.247433	G-protein coupled receptor 65 [Source:MGI Symbol;Acc:MGI:108031]	Gpr65	0.774201	1.06535	3.31401	3.57643	1.00595	4.81326
ENSMUSG00000044551	0.859675	0.0620269	1.68017	0.194901	0.439669	RIKEN cDNA 9930012K11 gene [Source:MGI Symbol;Acc:MGI:2145726]	9930012K11Rik	0.3871	0.940016	0.596521	1.21137	0.88021	1.32475
ENSMUSG00000051977	0.859455	1.77809	4.1821	0.040853	0.189471	PR domain containing 9 [Source:MGI Symbol;Acc:MGI:2384854]	Prdm9	2.94196	3.00805	0.795362	8.4796	2.51489	2.03128
ENSMUSG00000051041	0.859407	2.28311	8.0188	0.00462943	0.0619217	olfactomedin-like 1 [Source:MGI Symbol;Acc:MGI:2679264]	Olfml1	3.25164	4.01073	2.78377	6.57601	5.59562	5.96137
ENSMUSG00000041324	0.857025	2.64462	9.1187	0.0025301	0.0465892	inhibin beta-A [Source:MGI Symbol;Acc:MGI:96570]	Inhba	4.95489	4.19874	3.51285	11.883	6.60158	5.47563
ENSMUSG00000032841	0.85596	0.361462	2.19597	0.138372	0.365133	proline rich 5 like [Source:MGI Symbol;Acc:MGI:1919696]	Prr5l	0.464521	0.940016	1.06048	1.38442	1.50893	1.45722
ENSMUSG00000078184	0.855958	0.21984	1.7736	0.182937	0.424364	RNA binding motif protein 8A2 [Source:MGI Symbol;Acc:MGI:3612447]	Rbm8a2	0.23226	1.06535	0.994202	1.096	1.32032	1.36891
ENSMUSG00000047281	0.85566	2.96852	9.78938	0.00175522	0.0391604	stratifin [Source:MGI Symbol;Acc:MGI:1891831]	Sfn	3.79358	5.26409	7.3571	10.4409	7.73328	11.1721
ENSMUSG00000079164	0.854674	1.02968	2.70451	0.100065	0.306486	toll-like receptor 5 [Source:MGI Symbol;Acc:MGI:1858171]	Tlr5	0.851621	1.06535	2.18725	3.28801	2.07478	1.89881
ENSMUSG00000048096	0.854356	2.57651	9.47593	0.00208186	0.0422361	leiomodin 1 (smooth muscle) [Source:MGI Symbol;Acc:MGI:2135671]	Lmod1	4.64521	4.63741	3.11517	9.40255	6.91594	6.138
ENSMUSG00000043090	0.853494	5.12285	9.22809	0.00238331	0.0453523	zinc finger protein 866 [Source:MGI Symbol;Acc:MGI:3584369]	Zfp866	33.2132	31.6472	11.7316	60.6839	29.487	41.2439
ENSMUSG00000031994	0.851988	1.97978	6.97085	0.00828484	0.082861	a disintegrin-like and metallopeptidase (reprolysin type) with thrombospondin type 1 motif, 8 [Source:MGI Symbol;Acc:MGI:1353468]	Adamts8	2.47744	2.31871	3.24773	3.6918	5.28126	5.6081
ENSMUSG00000052496	0.851917	3.99824	15.3184	9.08277e-05	0.00821377	polycystin (PKD) family receptor for egg jelly [Source:MGI Symbol;Acc:MGI:1338786]	Pkdrej	10.9162	10.2148	12.2618	26.2464	19.3646	15.897
ENSMUSG00000035011	0.850251	5.66627	19.0023	1.30558e-05	0.00240926	zinc finger and BTB domain containing 7a [Source:MGI Symbol;Acc:MGI:1335091]	Zbtb7a	49.2392	48.0035	16.5038	77.5277	68.845	43.7609
ENSMUSG00000063488	0.849784	3.17142	7.7048	0.00550742	0.0675752	zinc finger with KRAB and SCAN domains 7 [Source:MGI Symbol;Acc:MGI:3040678]	Zkscan7	4.41294	8.89882	5.63381	15.171	10.0595	8.83166
ENSMUSG00000027102	0.849233	0.340907	2.16432	0.141247	0.369001	homeobox D8 [Source:MGI Symbol;Acc:MGI:96209]	Hoxd8	1.08388	0.689345	0.596521	2.07664	0.88021	1.41307
ENSMUSG00000103585	0.848841	4.50417	16.1179	5.95204e-05	0.00634247	protocadherin gamma subfamily B, 4 [Source:MGI Symbol;Acc:MGI:1935173]	Pcdhgb4	15.4066	18.2363	13.3886	41.3597	27.2865	19.518
ENSMUSG00000028578	0.848007	2.54644	8.53686	0.00348026	0.0542856	caspase activity and apoptosis inhibitor 1 [Source:MGI Symbol;Acc:MGI:1915020]	Caap1	3.17422	4.13607	4.83845	8.01812	6.47583	7.33028
ENSMUSG00000029402	0.847382	2.90945	8.20449	0.0041787	0.059381	small nuclear ribonucleoprotein 35 (U11/U12) [Source:MGI Symbol;Acc:MGI:1923417]	Snrnp35	6.03877	2.94538	7.29082	9.11412	9.17934	9.53819
ENSMUSG00000076433	0.846818	1.14035	3.55623	0.0593222	0.231542	CEP295 N-terminal like [Source:MGI Symbol;Acc:MGI:1929713]	Cep295nl	1.85808	1.56669	0.795362	4.90317	2.01191	1.32475
ENSMUSG00000060244	0.846523	1.69867	5.50981	0.0189101	0.128608	Aly/REF export factor 2 [Source:MGI Symbol;Acc:MGI:1913144]	Alyref2	1.85808	2.1307	2.51865	4.7878	2.89212	4.2392
ENSMUSG00000056481	0.846025	3.97955	13.5494	0.00023236	0.013652	CD248 antigen, endosialin [Source:MGI Symbol;Acc:MGI:1917695]	Cd248	10.9162	13.4109	8.08618	30.1112	19.6161	11.6136
ENSMUSG00000068794	0.84547	0.839628	3.04212	0.0811297	0.273044	collagen, type XXVIII, alpha 1 [Source:MGI Symbol;Acc:MGI:2685312]	Col28a1	0.929041	1.12802	1.39188	2.30737	1.50893	2.47287
ENSMUSG00000032715	0.844294	1.59512	5.6094	0.0178644	0.125161	tribbles pseudokinase 3 [Source:MGI Symbol;Acc:MGI:1345675]	Trib3	3.01938	2.00537	1.19304	5.5377	3.26935	2.34039
ENSMUSG00000027331	0.843804	1.50225	4.60464	0.0318856	0.16699	kinetochore-localized astrin/SPAG5 binding [Source:MGI Symbol;Acc:MGI:1289298]	Knstrn	2.16776	1.56669	1.72328	5.24927	1.69755	3.57682
ENSMUSG00000051067	0.842041	2.86211	9.6434	0.00190033	0.0406454	leucine rich repeat and Ig domain containing 3 [Source:MGI Symbol;Acc:MGI:3609246]	Lingo3	4.95489	6.58011	3.57913	12.1714	9.87093	5.6081
ENSMUSG00000020420	0.841371	3.63829	11.8707	0.000570255	0.0220398	zinc finger protein 607A [Source:MGI Symbol;Acc:MGI:3584526]	Zfp607a	9.67751	8.1468	7.42338	25.3811	10.0595	12.9825
ENSMUSG00000057137	0.840697	4.72405	18.6287	1.58809e-05	0.00266758	transmembrane protein 140 [Source:MGI Symbol;Acc:MGI:1915737]	Tmem140	15.5614	15.9176	25.4516	37.0333	27.9152	35.5033
ENSMUSG00000098132	0.840129	1.88689	4.71955	0.0298215	0.160842	Ras association (RalGDS/AF-6) domain family (N-terminal) member 10 [Source:MGI Symbol;Acc:MGI:1925998]	Rassf10	2.16776	3.76006	1.72328	6.28759	3.52084	3.75346
ENSMUSG00000078546	0.839574	0.832141	2.43113	0.118947	0.337253	zinc finger protein 995 [Source:MGI Symbol;Acc:MGI:1917331]	Zfp995	1.70324	0.313339	1.78956	2.88422	1.38319	1.81049
ENSMUSG00000045165	0.838987	1.21472	3.61294	0.0573318	0.228023	expressed sequence AI467606 [Source:MGI Symbol;Acc:MGI:2141979]	AI467606	1.70324	1.00268	1.92212	1.8459	2.82925	3.62098
ENSMUSG00000048647	0.838915	0.260972	1.93922	0.163753	0.39983	exonuclease 3'-5' domain containing 1 [Source:MGI Symbol;Acc:MGI:3045306]	Exd1	0.696781	0.501342	1.06048	1.8459	0.943082	1.28059
ENSMUSG00000078570	0.838342	3.43036	8.44033	0.00366989	0.0555871	RIKEN cDNA 1110065P20 gene [Source:MGI Symbol;Acc:MGI:1916170]	1110065P20Rik	8.98073	4.95075	9.08038	14.8249	16.0953	9.93562
ENSMUSG00000024136	0.838263	1.33008	4.2618	0.0389785	0.185708	deoxyribonuclease 1-like 2 [Source:MGI Symbol;Acc:MGI:1913955]	Dnase1l2	2.01292	1.88003	1.06048	4.96085	2.76638	1.63386
ENSMUSG00000056313	0.83598	6.31408	19.8745	8.2696e-06	0.00179175	RIKEN cDNA 1810011O10 gene [Source:MGI Symbol;Acc:MGI:1916318]	1810011O10Rik	57.678	49.1942	60.6463	142.192	76.7669	89.818
ENSMUSG00000041199	0.835178	2.38097	8.04756	0.0045565	0.0614931	RNA pseudouridylate synthase domain containing 1 [Source:MGI Symbol;Acc:MGI:1919186]	Rpusd1	5.03231	3.63473	2.45237	7.21054	6.35009	5.69642
ENSMUSG00000047613	0.834538	3.58449	15.8428	6.88266e-05	0.00684457	RIKEN cDNA A430005L14 gene [Source:MGI Symbol;Acc:MGI:2140680]	A430005L14Rik	9.05815	7.7708	8.6827	15.2287	15.2779	14.9255
ENSMUSG00000027954	0.832729	4.35043	15.1508	9.92538e-05	0.00831534	ephrin A1 [Source:MGI Symbol;Acc:MGI:103236]	Efna1	11.613	15.6669	16.2386	30.9188	24.08	22.7857
ENSMUSG00000008384	0.832402	4.23242	11.1866	0.000823883	0.0273326	SERTA domain containing 1 [Source:MGI Symbol;Acc:MGI:1913438]	Sertad1	9.44525	14.7269	16.0398	28.9575	23.8914	18.679
ENSMUSG00000030088	0.831899	1.47107	5.13494	0.0234489	0.142371	aldehyde dehydrogenase 1 family, member L1 [Source:MGI Symbol;Acc:MGI:1340024]	Aldh1l1	3.0968	1.44136	1.25932	4.90317	2.64063	2.51702
ENSMUSG00000059089	0.831773	0.78085	2.07694	0.14954	0.379851	Fc receptor, IgG, low affinity IV [Source:MGI Symbol;Acc:MGI:2179523]	Fcgr4	0.929041	0.438674	2.18725	1.03832	2.2634	2.51702
ENSMUSG00000040247	0.830307	2.31247	7.60416	0.00582338	0.0694249	TBC1 domain family, member 10c [Source:MGI Symbol;Acc:MGI:1922072]	Tbc1d10c	4.2581	3.25872	2.85005	6.80675	4.84116	6.75622
ENSMUSG00000062510	0.82843	0.864527	2.19487	0.138471	0.36526	NSL1, MIS12 kinetochore complex component [Source:MGI Symbol;Acc:MGI:2685830]	Nsl1	2.86454	0.376006	0.927922	2.24969	1.19457	2.51702
ENSMUSG00000018986	0.826149	2.48552	8.40641	0.00373899	0.056133	schlafen 3 [Source:MGI Symbol;Acc:MGI:1329005]	Slfn3	4.49036	3.44672	3.64541	9.80634	5.97286	5.34316
ENSMUSG00000098789	0.825328	2.24295	6.18178	0.0129072	0.105959	jumonji domain containing 7 [Source:MGI Symbol;Acc:MGI:3845785]	Jmjd7	5.49683	1.7547	3.18145	6.69138	5.21839	5.25484
ENSMUSG00000041623	0.824481	2.66738	3.23421	0.0721149	0.255918	DNA segment, Chr 11, Wayne State University 47, expressed [Source:MGI Symbol;Acc:MGI:106356]	D11Wsu47e	3.40648	7.01879	2.71749	6.80675	4.21243	12.4968
ENSMUSG00000030469	0.822053	3.65531	13.9859	0.000184191	0.0121671	zinc finger protein 719 [Source:MGI Symbol;Acc:MGI:2444708]	Zfp719	9.60009	8.64815	8.21874	21.9777	13.6433	12.541
ENSMUSG00000052485	0.818901	0.541929	1.42266	0.232966	0.485034	transmembrane protein 171 [Source:MGI Symbol;Acc:MGI:2685751]	Tmem171	0.696781	2.00537	0.265121	3.17264	1.25744	0.574058
ENSMUSG00000023947	0.818309	1.94645	6.36977	0.0116081	0.100721	nuclear factor of kappa light polypeptide gene enhancer in B cells inhibitor, epsilon [Source:MGI Symbol;Acc:MGI:1194908]	Nfkbie	3.01938	2.44404	2.51865	4.49938	4.08669	5.51979
ENSMUSG00000045689	0.817486	0.237481	1.09354	0.295689	0.550067	protocadherin beta 4 [Source:MGI Symbol;Acc:MGI:2136738]	Pcdhb4	0.23226	0.501342	1.39188	2.192	0.377233	1.41307
ENSMUSG00000040270	0.816708	2.37165	8.14656	0.00431429	0.0598791	BTB and CNC homology, basic leucine zipper transcription factor 2 [Source:MGI Symbol;Acc:MGI:894679]	Bach2	4.10326	3.6974	3.04889	8.07581	5.72137	5.47563
ENSMUSG00000033900	0.814421	2.35671	7.2847	0.00695445	0.0758664	microtubule-associated protein 9 [Source:MGI Symbol;Acc:MGI:2442208]	Map9	3.94842	4.82541	2.25353	6.92212	6.47583	5.38731
ENSMUSG00000021835	0.814301	3.08883	10.0062	0.00156018	0.0370317	bone morphogenetic protein 4 [Source:MGI Symbol;Acc:MGI:88180]	Bmp4	6.65813	5.26409	5.76637	15.7478	8.92785	7.77186
ENSMUSG00000095930	0.813647	2.85636	7.47835	0.00624453	0.0718791	NIM1 serine/threonine protein kinase [Source:MGI Symbol;Acc:MGI:2442399]	Nim1k	3.79358	7.08145	4.63961	10.7293	8.11051	8.03681
ENSMUSG00000023999	0.812876	1.82241	4.00365	0.0454019	0.200626	kinesin family member 6 [Source:MGI Symbol;Acc:MGI:1098238]	Kif6	3.56132	1.50403	2.45237	3.23032	5.40701	4.2392
ENSMUSG00000109564	0.812344	-0.341746	0.6349	0.425564	0.663304	mucin 16 [Source:MGI Symbol;Acc:MGI:1920982]	Muc16	0	1.12802	0.331401	0.692212	1.82329	0.0883166
ENSMUSG00000074141	0.810918	-0.500123	0.533935	0.464957	0.69423	interleukin 4 induced 1 [Source:MGI Symbol;Acc:MGI:109552]	Il4i1	0.3871	0.313339	0.19884	1.38442	0	1.01564
ENSMUSG00000027318	0.809732	0.416039	1.48299	0.223307	0.47404	a disintegrin and metallopeptidase domain 33 [Source:MGI Symbol;Acc:MGI:1341813]	Adam33	0.15484	1.56669	1.12676	1.15369	1.25744	1.76633
ENSMUSG00000042515	0.808248	2.54963	6.24883	0.0124275	0.103975	melanoma associated antigen (mutated) 1-like 1 [Source:MGI Symbol;Acc:MGI:2445062]	Mum1l1	1.85808	5.76543	5.30241	6.22991	8.11051	6.80038
ENSMUSG00000047669	0.806499	0.684582	2.54273	0.110803	0.32353	male-specific lethal 3-like 2 (Drosophila) [Source:MGI Symbol;Acc:MGI:1920640]	Msl3l2	0.851621	1.12802	1.19304	1.96127	1.69755	1.89881
ENSMUSG00000026708	0.804399	1.2508	3.58424	0.0583302	0.229986	centromere protein L [Source:MGI Symbol;Acc:MGI:1917704]	Cenpl	1.62582	1.7547	1.39188	3.11495	2.01191	3.35603
ENSMUSG00000030838	0.803965	0.845033	1.14858	0.283846	0.539526	USH1 protein network component harmonin [Source:MGI Symbol;Acc:MGI:1919338]	Ush1c	0.3871	1.31602	1.3256	4.73012	1.00595	1.10396
ENSMUSG00000050234	0.803233	3.62511	10.3755	0.00127697	0.0333184	gap junction protein, alpha 4 [Source:MGI Symbol;Acc:MGI:95715]	Gja4	8.36137	9.21216	8.21874	22.9007	11.4427	12.8501
ENSMUSG00000049792	0.801859	4.57241	14.2184	0.000162775	0.0112246	BCL2-associated athanogene 5 [Source:MGI Symbol;Acc:MGI:1917619]	Bag5	16.1034	13.4109	21.8725	39.8022	23.5142	26.9807
ENSMUSG00000029861	0.800756	0.687317	2.02648	0.154579	0.387206	family with sequence similarity 131, member B [Source:MGI Symbol;Acc:MGI:1923406]	Fam131b	0.851621	0.940016	1.19304	3.17264	1.00595	1.5897
ENSMUSG00000093962	0.800341	0.834298	1.61499	0.203792	0.451028	predicted gene 11756 [Source:MGI Symbol;Acc:MGI:3702095]	Gm11756	2.09034	0.250671	1.39188	3.98022	1.5718	0.79485
ENSMUSG00000086596	0.800235	1.47201	3.27139	0.0704979	0.253224	sushi domain containing 5 [Source:MGI Symbol;Acc:MGI:2685972]	Susd5	0.929041	2.44404	2.45237	3.98022	3.45797	2.47287
ENSMUSG00000063687	0.79974	0.131922	1.65606	0.198136	0.443378	protocadherin beta 5 [Source:MGI Symbol;Acc:MGI:2136739]	Pcdhb5	1.23872	0.501342	0.463961	1.61516	1.32032	0.750691
ENSMUSG00000035407	0.798466	0.394262	2.11453	0.145907	0.374985	KN motif and ankyrin repeat domains 4 [Source:MGI Symbol;Acc:MGI:3043381]	Kank4	1.00646	0.689345	0.861642	1.67285	1.19457	1.5897
ENSMUSG00000041775	0.797637	4.3252	9.73114	0.00181172	0.039657	mitogen-activated protein kinase 1 interacting protein 1 [Source:MGI Symbol;Acc:MGI:1916796]	Mapk1ip1	18.1937	20.4923	6.49546	36.1681	20.182	17.84
ENSMUSG00000041481	0.795243	1.1213	3.39841	0.0652593	0.243182	serine (or cysteine) peptidase inhibitor, clade A, member 3G [Source:MGI Symbol;Acc:MGI:105046]	Serpina3g	1.5484	2.25604	0.662802	2.9419	3.96095	1.01564
ENSMUSG00000046491	0.795026	1.73832	4.56836	0.0325677	0.168857	C1q and tumor necrosis factor related protein 2 [Source:MGI Symbol;Acc:MGI:1916433]	C1qtnf2	1.78066	1.81736	3.51285	4.32632	3.8352	3.79761
ENSMUSG00000071001	0.793854	2.35875	7.45137	0.00633882	0.0725972	histidine rich carboxyl terminus 1 [Source:MGI Symbol;Acc:MGI:1917945]	Hrct1	3.17422	3.63473	4.04309	6.80675	5.53275	6.53543
ENSMUSG00000017718	0.793356	1.78196	4.82051	0.028123	0.155884	arylformamidase [Source:MGI Symbol;Acc:MGI:2448704]	Afmid	2.7097	2.25604	1.9884	6.17222	4.65254	2.1196
ENSMUSG00000037216	0.792072	2.56329	4.48442	0.0342051	0.173502	lipoyltransferase 1 [Source:MGI Symbol;Acc:MGI:3645211]	Lipt1	2.01292	6.45478	4.50705	8.71033	7.73328	5.07821
ENSMUSG00000074220	0.792035	1.88412	3.35086	0.0671698	0.247555	zinc finger protein 382 [Source:MGI Symbol;Acc:MGI:3588204]	Zfp382	3.4839	1.00268	3.71169	5.8838	4.33818	3.00276
ENSMUSG00000033350	0.791582	2.29214	5.22086	0.0223175	0.139057	carbohydrate sulfotransferase 2 [Source:MGI Symbol;Acc:MGI:1891160]	Chst2	3.94842	4.38674	2.12096	7.78738	4.21243	5.91721
ENSMUSG00000072476	0.791561	0.0609447	1.50342	0.220146	0.470301	predicted pseudogene 9008 [Source:MGI Symbol;Acc:MGI:3644000]	Gm9008	0.851621	0.877348	0.331401	1.21137	1.06883	1.10396
ENSMUSG00000025226	0.791403	2.16843	7.0072	0.00811825	0.0818807	F-box and leucine-rich repeat protein 15 [Source:MGI Symbol;Acc:MGI:1915681]	Fbxl15	3.01938	3.07072	3.38029	5.76843	4.77828	5.91721
ENSMUSG00000072582	0.791021	3.9984	10.3267	0.00131118	0.0335692	peptidyl-tRNA hydrolase 2 [Source:MGI Symbol;Acc:MGI:2444848]	Ptrh2	8.05169	12.4082	14.5154	23.4198	19.3018	17.1334
ENSMUSG00000054626	0.789942	-0.23426	0.808012	0.368709	0.61547	X-linked lymphocyte-regulated [Source:MGI Symbol;Acc:MGI:98976]	Xlr	0	0.752013	0.729082	0.230737	0.377233	1.89881
ENSMUSG00000028545	0.789859	2.57697	7.92946	0.00486363	0.063384	BEN domain containing 5 [Source:MGI Symbol;Acc:MGI:1914871]	Bend5	5.10973	3.50939	3.97681	10.4409	6.47583	5.43147
ENSMUSG00000012640	0.788986	5.88039	15.2985	9.17902e-05	0.00821377	zinc finger protein 715 [Source:MGI Symbol;Acc:MGI:1917180]	Zfp715	44.2069	41.5487	38.7739	114.215	53.5042	60.1436
ENSMUSG00000074211	0.78828	4.1485	13.6305	0.000222544	0.013502	succinate dehydrogenase complex assembly factor 1 [Source:MGI Symbol;Acc:MGI:1915582]	Sdhaf1	10.9937	11.5309	16.3049	24.6312	21.8166	20.092
ENSMUSG00000031504	0.786021	5.06212	13.0136	0.000309243	0.015827	RAB20, member RAS oncogene family [Source:MGI Symbol;Acc:MGI:102789]	Rab20	18.426	25.9444	28.7656	51.8005	37.2203	37.1813
ENSMUSG00000049285	0.784702	1.37755	3.75481	0.0526559	0.217359	metallo-beta-lactamase domain containing 1 [Source:MGI Symbol;Acc:MGI:2679717]	Mblac1	1.85808	2.06803	1.39188	4.15327	2.2634	2.91445
ENSMUSG00000053825	0.783846	0.853784	2.70439	0.100072	0.306486	protein tyrosine phosphatase, receptor type, f polypeptide (PTPRF), interacting protein (liprin), alpha 2 [Source:MGI Symbol;Acc:MGI:2443834]	Ppfia2	1.31614	1.06535	1.19304	2.9419	1.44606	1.98712
ENSMUSG00000041707	0.783438	0.954482	2.75446	0.0969833	0.302744	RIKEN cDNA 1810011H11 gene [Source:MGI Symbol;Acc:MGI:1916319]	1810011H11Rik	0.851621	0.940016	2.25353	1.61516	2.20053	2.78197
ENSMUSG00000047649	0.783298	4.24925	15.2474	9.43084e-05	0.00821377	CD3E antigen, epsilon polypeptide associated protein [Source:MGI Symbol;Acc:MGI:1917583]	Cd3eap	12.6969	13.0349	15.6421	28.3807	21.7538	21.5493
ENSMUSG00000067931	0.781249	4.11205	10.2291	0.00138241	0.0346979	zinc finger protein 948 [Source:MGI Symbol;Acc:MGI:3040683]	Zfp948	13.3937	9.65083	12.3281	38.4754	13.8319	15.1021
ENSMUSG00000043602	0.780588	3.37474	11.7553	0.000606707	0.0229722	zinc finger protein 3 [Source:MGI Symbol;Acc:MGI:99177]	Zfp3	10.142	7.39479	5.16985	17.1322	11.0026	10.5097
ENSMUSG00000036376	0.780249	3.48484	10.7402	0.00104831	0.0306612	activator of basal transcription 1 [Source:MGI Symbol;Acc:MGI:1353636]	Abt1	6.65813	7.64546	10.0746	15.9786	12.8259	12.9384
ENSMUSG00000053963	0.779294	2.23852	4.83172	0.0279407	0.155382	mechanosensory transduction mediator [Source:MGI Symbol;Acc:MGI:2138735]	Stum	5.80651	1.7547	3.11517	6.46065	5.97286	4.50415
ENSMUSG00000033544	0.777079	1.73284	5.2518	0.0219241	0.138084	angiopoietin-like 1 [Source:MGI Symbol;Acc:MGI:1919963]	Angptl1	2.40002	2.31871	2.25353	4.32632	3.52084	4.15088
ENSMUSG00000079592	0.776141	1.58037	2.33689	0.126341	0.348574	C1q and tumor necrosis factor related protein 5 [Source:MGI Symbol;Acc:MGI:2385958]	C1qtnf5	0.774201	2.50671	3.24773	4.32632	4.02382	2.20792
ENSMUSG00000027514	0.776052	0.635293	1.92961	0.164801	0.401417	Z-DNA binding protein 1 [Source:MGI Symbol;Acc:MGI:1927449]	Zbp1	0.696781	0.877348	1.52444	2.42274	1.32032	1.5897
ENSMUSG00000052419	0.774504	3.77837	12.1841	0.000481996	0.0201118	RIKEN cDNA 2610001J05 gene [Source:MGI Symbol;Acc:MGI:1913770]	2610001J05Rik	8.90331	8.77348	12.4607	17.4784	18.1701	15.5437
ENSMUSG00000039725	0.774304	3.46961	8.59533	0.00337027	0.0539161	transformation related protein 53 regulating kinase A [Source:MGI Symbol;Acc:MGI:1918294]	Trp53rka	6.96781	8.83615	7.82106	18.8051	9.80806	13.115
ENSMUSG00000025235	0.773905	2.09489	5.81571	0.0158836	0.117261	Bardet-Biedl syndrome 4 (human) [Source:MGI Symbol;Acc:MGI:2143311]	Bbs4	2.16776	3.63473	3.31401	5.13391	4.65254	5.65226
ENSMUSG00000071723	0.773623	0.245475	1.34666	0.245863	0.499657	G1 to S phase transition 2 [Source:MGI Symbol;Acc:MGI:1316727]	Gspt2	1.23872	0.313339	0.795362	0.865265	0.943082	2.03128
ENSMUSG00000056501	0.773523	5.83809	23.6384	1.16243e-06	0.000390517	CCAAT/enhancer binding protein (C/EBP), beta [Source:MGI Symbol;Acc:MGI:88373]	Cebpb	43.2778	40.358	42.6181	68.5867	71.4228	75.864
ENSMUSG00000062376	0.773039	3.15335	9.78683	0.00175766	0.0391604	BLOC-1 related complex subunit 7 [Source:MGI Symbol;Acc:MGI:1913689]	Borcs7	10.142	6.39211	3.51285	13.9019	11.0655	7.63939
ENSMUSG00000068391	0.772893	4.93439	16.7107	4.35338e-05	0.00559196	chromatin accessibility complex 1 [Source:MGI Symbol;Acc:MGI:2135796]	Chrac1	20.4389	22.9991	23.3306	47.1858	36.9688	31.529
ENSMUSG00000046589	0.772862	0.420265	1.87977	0.170361	0.409342	leucine rich repeat containing 8 family, member E [Source:MGI Symbol;Acc:MGI:1919517]	Lrrc8e	0.774201	1.31602	0.596521	1.90358	1.63468	1.01564
ENSMUSG00000028358	0.771746	0.573779	1.64668	0.199412	0.444844	zinc finger protein 618 [Source:MGI Symbol;Acc:MGI:1919950]	Zfp618	1.9355	0.376006	0.861642	2.59579	1.76042	0.79485
ENSMUSG00000031443	0.771224	-0.181128	1.30152	0.253935	0.508013	coagulation factor VII [Source:MGI Symbol;Acc:MGI:109325]	F7	0.774201	0.313339	0.596521	0.922949	0.754466	1.10396
ENSMUSG00000037014	0.770413	0.493929	1.68729	0.193959	0.437996	somatostatin receptor 4 [Source:MGI Symbol;Acc:MGI:105372]	Sstr4	0.851621	1.19069	0.662802	2.59579	1.00595	1.28059
ENSMUSG00000068079	0.770094	3.88651	12.3179	0.000448632	0.0193992	transcription factor 15 [Source:MGI Symbol;Acc:MGI:104664]	Tcf15	11.1485	11.5309	8.94782	26.5925	17.1641	12.4526
ENSMUSG00000037548	0.769837	-0.384233	0.556683	0.4556	0.686934	histocompatibility 2, class II, locus Mb2 [Source:MGI Symbol;Acc:MGI:95923]	H2-DMb2	1.5484	0	0.397681	0.461475	0.314361	1.14812
ENSMUSG00000097239	0.769618	2.10053	2.84422	0.0917033	0.293908	predicted gene, 27029 [Source:MGI Symbol;Acc:MGI:5504144]	Gm27029	3.79358	1.44136	4.04309	5.99917	6.97881	2.82613
ENSMUSG00000056708	0.766712	6.09738	17.5157	2.84939e-05	0.00424236	immediate early response 5 [Source:MGI Symbol;Acc:MGI:1337072]	Ier5	45.3682	43.2407	61.8394	103.659	61.4261	94.0572
ENSMUSG00000027068	0.766541	0.45816	1.40694	0.235565	0.488583	dehydrogenase/reductase (SDR family) member 9 [Source:MGI Symbol;Acc:MGI:2442798]	Dhrs9	1.00646	0.250671	1.39188	0.634528	1.06883	2.82613
ENSMUSG00000027323	0.764259	0.366317	1.72762	0.188716	0.431704	RAD51 recombinase [Source:MGI Symbol;Acc:MGI:97890]	Rad51	0.464521	1.00268	1.12676	1.38442	1.5718	1.32475
ENSMUSG00000055835	0.764092	3.25048	8.63273	0.00330177	0.0532756	zinc finger protein 1 [Source:MGI Symbol;Acc:MGI:99154]	Zfp1	7.20007	7.20679	5.83265	17.4784	8.67636	9.71483
ENSMUSG00000053226	0.762397	2.98148	9.15203	0.00248442	0.0463029	DAN domain family member 5, BMP antagonist [Source:MGI Symbol;Acc:MGI:1344365]	Dand5	4.02584	6.2041	7.0257	8.42191	9.05359	11.4812
ENSMUSG00000028629	0.762255	2.35708	5.36248	0.0205745	0.133894	exonuclease 5 [Source:MGI Symbol;Acc:MGI:1920422]	Exo5	3.0968	4.95075	2.91633	8.65265	5.40701	4.7691
ENSMUSG00000051390	0.761129	5.02431	15.1477	9.94172e-05	0.00831534	zinc finger and BTB domain containing 22 [Source:MGI Symbol;Acc:MGI:1931870]	Zbtb22	22.2196	25.5684	23.1981	54.3386	35.2084	33.6928
ENSMUSG00000040761	0.760561	6.51581	14.8116	0.0001188	0.00937663	SPEN homolog, transcriptional regulator (Drosophila) [Source:MGI Symbol;Acc:MGI:1891706]	Spen	90.7363	80.9667	28.6993	198.953	94.3082	54.6238
ENSMUSG00000025577	0.759628	2.54193	5.34484	0.0207837	0.134473	chromobox 2 [Source:MGI Symbol;Acc:MGI:88289]	Cbx2	3.17422	5.70276	3.64541	9.74865	6.41296	5.299
ENSMUSG00000046982	0.758495	5.71283	19.257	1.14253e-05	0.00223779	teashirt zinc finger family member 1 [Source:MGI Symbol;Acc:MGI:1346031]	Tshz1	41.7294	40.2327	33.1401	87.7956	56.8364	53.9615
ENSMUSG00000030823	0.758054	3.00955	9.22128	0.00239218	0.0453523	RIKEN cDNA 9130019O22 gene [Source:MGI Symbol;Acc:MGI:1926171]	9130019O22Rik	6.34845	6.58011	4.63961	12.2868	9.17934	8.34592
ENSMUSG00000032202	0.757816	1.56052	3.59602	0.0579181	0.229258	RAB27A, member RAS oncogene family [Source:MGI Symbol;Acc:MGI:1861441]	Rab27a	1.00646	1.88003	3.64541	2.76885	3.64659	3.75346
ENSMUSG00000072620	0.757132	3.90427	11.5451	0.000679291	0.0247876	schlafen 2 [Source:MGI Symbol;Acc:MGI:1313258]	Slfn2	7.04523	10.5282	15.5758	17.3053	13.3918	24.6403
ENSMUSG00000064030	0.756982	2.98312	8.99553	0.00270641	0.0480632	PYM homolog 1, exon junction complex associated factor [Source:MGI Symbol;Acc:MGI:1925678]	Pym1	6.11619	4.76275	6.23033	12.6329	7.79615	8.91998
ENSMUSG00000037617	0.755229	1.79654	4.13279	0.0420601	0.192613	sperm associated antigen 1 [Source:MGI Symbol;Acc:MGI:1349387]	Spag1	3.01938	1.62936	2.51865	7.03749	3.3951	2.47287
ENSMUSG00000019826	0.755174	3.85959	11.612	0.000655271	0.0241162	zinc finger and BTB domain containing 24 [Source:MGI Symbol;Acc:MGI:3039618]	Zbtb24	11.5356	10.2148	9.41178	26.6502	12.9517	15.3229
ENSMUSG00000041219	0.755065	2.63911	7.5473	0.00601002	0.0701812	Rho GTPase activating protein 11A [Source:MGI Symbol;Acc:MGI:2444300]	Arhgap11a	4.02584	4.01073	5.50125	8.13349	6.66445	7.99265
ENSMUSG00000033669	0.755016	1.83187	3.95127	0.0468361	0.203743	zinc finger protein 7 [Source:MGI Symbol;Acc:MGI:99208]	Zfp7	3.17422	1.50403	3.04889	5.19159	4.58967	3.09108
ENSMUSG00000039405	0.754988	5.00914	13.4008	0.000251518	0.0141433	protease, serine 23 [Source:MGI Symbol;Acc:MGI:1923703]	Prss23	17.884	19.427	34.2668	46.6089	26.0919	47.6468
ENSMUSG00000029073	0.752686	3.10843	6.98571	0.00821629	0.0824407	ceramide-1-phosphate transfer protein [Source:MGI Symbol;Acc:MGI:1933107]	Cptp	5.34199	8.39748	5.23613	11.5369	8.42487	11.6578
ENSMUSG00000049300	0.752194	3.13107	9.72755	0.00181527	0.039657	protein arginine N-methyltransferase 6 [Source:MGI Symbol;Acc:MGI:2139971]	Prmt6	6.34845	5.20142	7.6885	12.1137	9.36795	10.8188
ENSMUSG00000037139	0.751795	2.63526	4.96034	0.0259351	0.149924	myomesin family, member 3 [Source:MGI Symbol;Acc:MGI:2685280]	Myom3	3.40648	5.57743	4.17565	11.3638	6.60158	5.21068
ENSMUSG00000048878	0.750389	4.8574	13.1134	0.000293198	0.015157	hexamethylene bis-acetamide inducible 1 [Source:MGI Symbol;Acc:MGI:2385923]	Hexim1	21.6002	25.5058	15.9072	53.8195	31.5618	24.5962
ENSMUSG00000061601	0.75033	0.504639	1.63679	0.200766	0.446822	piccolo (presynaptic cytomatrix protein) [Source:MGI Symbol;Acc:MGI:1349390]	Pclo	1.08388	1.69203	0.265121	1.03832	2.76638	0.971483
ENSMUSG00000042106	0.750263	2.83342	5.06414	0.0244258	0.144654	family with sequence similarity 212, member A [Source:MGI Symbol;Acc:MGI:1915426]	Fam212a	4.2581	3.8854	7.6885	10.3832	9.17934	6.49127
ENSMUSG00000055652	0.749617	3.24257	6.68856	0.00970333	0.0908742	kelch-like 25 [Source:MGI Symbol;Acc:MGI:2668031]	Klhl25	5.65167	6.70545	8.0199	16.44	10.4997	8.52255
ENSMUSG00000036334	0.748802	4.02128	13.345	0.00025911	0.0142641	immunoglobulin superfamily, member 10 [Source:MGI Symbol;Acc:MGI:1923481]	Igsf10	14.6324	11.7815	9.08038	29.0152	15.0893	16.8685
ENSMUSG00000045868	0.748697	6.87246	11.9884	0.000535318	0.0211895	GTPase, very large interferon inducible 1 [Source:MGI Symbol;Acc:MGI:1921808]	Gvin1	69.2136	78.2093	112.875	184.878	102.544	154.068
ENSMUSG00000051499	0.748415	1.02632	2.62837	0.104969	0.314228	zinc finger protein 786 [Source:MGI Symbol;Acc:MGI:3026883]	Zfp786	1.5484	1.31602	1.19304	3.98022	1.88616	1.50138
ENSMUSG00000020811	0.748236	3.13191	8.77573	0.00305265	0.0511067	WSC domain containing 1 [Source:MGI Symbol;Acc:MGI:2448493]	Wscd1	7.81943	7.01879	4.63961	11.5369	9.87093	10.7305
ENSMUSG00000078606	0.748224	6.8376	12.0113	0.000528794	0.0211227	predicted gene 4070 [Source:MGI Symbol;Acc:MGI:3782245]	Gm4070	67.1232	76.0159	111.284	179.283	99.9667	151.331
ENSMUSG00000023882	0.747466	1.54153	3.38432	0.0658192	0.244624	zinc finger protein 54 [Source:MGI Symbol;Acc:MGI:99201]	Zfp54	1.00646	2.50671	2.65121	2.99959	2.45201	4.68078
ENSMUSG00000031070	0.746385	1.93996	3.49405	0.0615896	0.236156	MAS-related GPR, member F [Source:MGI Symbol;Acc:MGI:2384823]	Mrgprf	1.9355	4.13607	2.18725	6.46065	3.52084	3.79761
ENSMUSG00000098374	0.745606	3.22438	3.79557	0.0513884	0.214937	predicted gene, 28043 [Source:MGI Symbol;Acc:MGI:5547779]	Gm28043	6.11619	6.58011	4.30821	27.054	6.0986	4.98989
ENSMUSG00000067297	0.745248	2.6736	7.76727	0.00532013	0.066593	interferon induced protein with tetratricopeptide repeats 1B like 2 [Source:MGI Symbol;Acc:MGI:2148249]	Ifit1bl2	5.34199	4.38674	4.17565	9.51791	7.6704	6.31464
ENSMUSG00000034987	0.745177	0.397083	1.03317	0.309414	0.562657	histamine receptor H2 [Source:MGI Symbol;Acc:MGI:108482]	Hrh2	0.30968	1.06535	1.25932	2.01895	1.88616	0.618216
ENSMUSG00000026271	0.744779	1.80261	4.04707	0.044248	0.198347	G protein-coupled receptor 35 [Source:MGI Symbol;Acc:MGI:1929509]	Gpr35	1.9355	2.82005	2.58493	5.71075	3.3951	3.53266
ENSMUSG00000044006	0.743889	1.36476	3.28675	0.0698413	0.251806	cartilage intermediate layer protein 2 [Source:MGI Symbol;Acc:MGI:1915959]	Cilp2	0.619361	4.19874	0.861642	1.096	6.28722	1.63386
ENSMUSG00000046667	0.742285	4.34331	7.90294	0.00493545	0.0637244	RNA binding motif protein 12 B1 [Source:MGI Symbol;Acc:MGI:1919647]	Rbm12b1	14.1679	8.96148	18.6247	44.8784	10.3739	23.6247
ENSMUSG00000022537	0.741678	3.90464	12.9126	0.000326377	0.0163214	transmembrane protein 44 [Source:MGI Symbol;Acc:MGI:1924489]	Tmem44	13.4711	7.39479	12.6595	23.2468	15.2779	16.8685
ENSMUSG00000000562	0.740905	-0.423846	0.987577	0.320335	0.572818	adenosine A3 receptor [Source:MGI Symbol;Acc:MGI:104847]	Adora3	0.23226	0.501342	0.662802	0.749896	0.754466	0.750691
ENSMUSG00000043311	0.740687	4.79842	13.3655	0.000256301	0.0142641	DNA segment, Chr 17, human D6S53E [Source:MGI Symbol;Acc:MGI:90673]	D17H6S53E	19.355	22.1217	19.6189	46.8974	28.6068	29.3211
ENSMUSG00000037085	0.73994	3.42362	6.46299	0.0110144	0.0980287	tRNA methyltranferase 12 [Source:MGI Symbol;Acc:MGI:1915510]	Trmt12	5.18715	8.1468	10.3397	16.9015	9.68231	12.9825
ENSMUSG00000033952	0.739925	2.85237	8.48675	0.00357742	0.0548802	asp (abnormal spindle)-like, microcephaly associated (Drosophila) [Source:MGI Symbol;Acc:MGI:1334448]	Aspm	6.27103	3.44672	6.16405	10.3832	6.03573	9.97978
ENSMUSG00000046034	0.739753	5.26806	17.7618	2.50356e-05	0.00381414	OTU deubiquitinase with linear linkage specificity [Source:MGI Symbol;Acc:MGI:3577015]	Otulin	29.3422	25.5058	30.8203	59.2995	43.8219	41.4205
ENSMUSG00000006642	0.738895	2.53287	5.38205	0.0203449	0.133417	transcription factor 23 [Source:MGI Symbol;Acc:MGI:1934960]	Tcf23	3.17422	4.88808	4.44077	8.71033	5.21839	7.1978
ENSMUSG00000055485	0.738791	5.67571	17.3945	3.03698e-05	0.00425506	suppressor of glucose, autophagy associated 1 [Source:MGI Symbol;Acc:MGI:2444575]	Soga1	49.2392	37.2246	25.0539	103.14	49.8576	41.3322
ENSMUSG00000020258	0.738606	1.19214	2.18358	0.13949	0.366987	glycerate kinase [Source:MGI Symbol;Acc:MGI:2444085]	Glyctk	1.31614	2.88272	0.861642	3.11495	2.07478	2.51702
ENSMUSG00000034685	0.738412	2.71136	6.26469	0.0123168	0.103839	family with sequence similarity 171, member A2 [Source:MGI Symbol;Acc:MGI:2448496]	Fam171a2	4.64521	4.44941	5.03729	9.5756	9.43082	5.34316
ENSMUSG00000049555	0.738294	1.19043	3.11247	0.0776949	0.267391	transmembrane inner ear [Source:MGI Symbol;Acc:MGI:2159400]	Tmie	2.24518	1.00268	1.657	3.23032	2.2634	2.47287
ENSMUSG00000074170	0.737516	4.83116	18.1552	2.03612e-05	0.00321413	pleckstrin homology domain containing, family F (with FYVE domain) member 1 [Source:MGI Symbol;Acc:MGI:1919537]	Plekhf1	23.8454	21.307	18.0945	45.1668	30.6187	30.7783
ENSMUSG00000044949	0.736794	2.22418	4.57784	0.032388	0.168428	ubiquitin domain containing 2 [Source:MGI Symbol;Acc:MGI:2444752]	Ubtd2	2.63228	2.69471	4.77217	7.67202	4.14956	5.12236
ENSMUSG00000036036	0.735117	0.736284	1.17176	0.279041	0.535329	zinc finger protein 57 [Source:MGI Symbol;Acc:MGI:99204]	Zfp57	1.47098	0.125335	2.58493	1.8459	1.44606	1.76633
ENSMUSG00000078503	0.734807	0.662914	0.844677	0.358063	0.6051	zinc finger protein 990 [Source:MGI Symbol;Acc:MGI:3652161]	Zfp990	0	0	3.84425	0	0.251489	4.10672
ENSMUSG00000071256	0.733864	3.55826	11.9192	0.000555579	0.021794	zinc finger protein 213 [Source:MGI Symbol;Acc:MGI:3053094]	Zfp213	7.74201	7.70813	10.6711	14.9979	11.9457	16.471
ENSMUSG00000052105	0.733165	3.05902	8.49125	0.00356859	0.054867	microtubule crosslinking factor 1 [Source:MGI Symbol;Acc:MGI:1915867]	Mtcl1	6.96781	5.89077	5.23613	14.4788	7.73328	8.74334
ENSMUSG00000050945	0.732994	3.3855	9.47448	0.0020835	0.0422361	zinc finger protein 438 [Source:MGI Symbol;Acc:MGI:2444919]	Zfp438	7.89685	8.1468	6.6943	17.7668	12.2601	9.05245
ENSMUSG00000048874	0.73295	6.26325	20.2093	6.94138e-06	0.00163537	PHD finger protein 3 [Source:MGI Symbol;Acc:MGI:2446126]	Phf3	55.0457	61.289	56.4044	99.7362	91.6047	95.6911
ENSMUSG00000100235	0.732929	2.64562	5.31451	0.0211485	0.136016	predicted gene 28557 [Source:MGI Symbol;Acc:MGI:5579263]	Gm28557	5.88393	2.82005	5.23613	9.22949	8.04764	5.56395
ENSMUSG00000072774	0.731974	2.17917	5.89885	0.0151508	0.114545	zinc finger protein 951 [Source:MGI Symbol;Acc:MGI:2441896]	Zfp951	4.41294	1.9427	3.38029	7.96044	2.95499	5.56395
ENSMUSG00000057835	0.731671	2.65477	6.757	0.00933805	0.0891743	zinc finger protein 119a [Source:MGI Symbol;Acc:MGI:1345189]	Zfp119a	5.34199	3.57206	4.70589	11.1331	6.0986	6.04969
ENSMUSG00000047787	0.731641	0.0780229	1.11606	0.290769	0.545873	fibronectin leucine rich transmembrane protein 1 [Source:MGI Symbol;Acc:MGI:3026647]	Flrt1	0.541941	1.56669	0.19884	1.55748	1.25744	0.485741
ENSMUSG00000043831	0.730517	4.39754	12.3677	0.000436817	0.0190825	LysM, putative peptidoglycan-binding, domain containing 4 [Source:MGI Symbol;Acc:MGI:1922349]	Lysmd4	15.1743	13.5989	18.0945	32.6493	24.8345	21.1518
ENSMUSG00000057130	0.730503	3.91388	12.1187	0.000499187	0.0203749	thioredoxin-like 4A [Source:MGI Symbol;Acc:MGI:1351613]	Txnl4a	10.9162	12.8469	9.6769	23.3045	16.6611	16.0295
ENSMUSG00000046269	0.730224	1.01697	1.95637	0.161902	0.397162	ubiquitin specific peptidase 27, X chromosome [Source:MGI Symbol;Acc:MGI:1859645]	Usp27x	0.929041	1.56669	1.52444	3.34569	1.19457	2.56118
ENSMUSG00000042895	0.729802	6.0567	14.833	0.000117461	0.0093271	actin-binding Rho activating protein [Source:MGI Symbol;Acc:MGI:2444891]	Abra	46.8392	44.6821	56.2056	108.62	61.8662	80.059
ENSMUSG00000046351	0.729118	4.61177	5.38888	0.0202655	0.133338	zinc finger protein 322A [Source:MGI Symbol;Acc:MGI:2442566]	Zfp322a	5.18715	23.7511	32.6761	21.92	26.7207	35.15
ENSMUSG00000050107	0.728092	0.719245	2.08011	0.149229	0.379504	histone H3 associated protein kinase [Source:MGI Symbol;Acc:MGI:1194498]	Haspin	1.31614	0.56401	1.59072	2.07664	1.32032	2.1196
ENSMUSG00000071654	0.72783	4.9047	10.8375	0.00099463	0.0299578	ubiquinol-cytochrome c reductase complex assembly factor 3 [Source:MGI Symbol;Acc:MGI:2147553]	Uqcc3	19.0453	23.3124	23.7283	47.8203	39.4208	25.4793
ENSMUSG00000020774	0.727279	1.40117	3.54201	0.0598331	0.232621	aspartoacylase [Source:MGI Symbol;Acc:MGI:87914]	Aspa	1.31614	2.00537	2.31981	3.05727	2.95499	3.22356
ENSMUSG00000050271	0.726962	4.53211	15.7578	7.19903e-05	0.00698679	PEAK1 related kinase activating pseudokinase 1 [Source:MGI Symbol;Acc:MGI:1196223]	Prag1	18.3486	19.3643	14.2502	33.1685	26.7207	25.9651
ENSMUSG00000045538	0.726928	3.84016	9.78812	0.00175643	0.0391604	DEAD (Asp-Glu-Ala-Asp) box polypeptide 28 [Source:MGI Symbol;Acc:MGI:1919236]	Ddx28	8.28395	10.0895	13.7863	20.1895	16.2839	16.2503
ENSMUSG00000032733	0.726898	4.81749	16.1651	5.80547e-05	0.00634247	sorting nexin 33 [Source:MGI Symbol;Acc:MGI:2443239]	Snx33	25.3164	18.9257	17.6968	51.9736	29.1727	25.2144
ENSMUSG00000101959	0.726519	-0.342877	0.932913	0.334107	0.584407	lactate dehydrogenase A-like 6B [Source:MGI Symbol;Acc:MGI:2146830]	Ldhal6b	0.30968	1.12802	0.19884	0.519159	1.1317	0.662375
ENSMUSG00000069910	0.725021	0.423109	1.49795	0.220988	0.471297	spindle apparatus coiled-coil protein 1 [Source:MGI Symbol;Acc:MGI:1917635]	Spdl1	0.774201	0.940016	0.861642	2.192	0.817338	1.54554
ENSMUSG00000033355	0.724971	2.23327	3.41723	0.064519	0.241878	receptor transporter protein 4 [Source:MGI Symbol;Acc:MGI:1915025]	Rtp4	1.9355	3.63473	4.30821	6.51833	2.7035	7.81602
ENSMUSG00000061414	0.72452	0.655997	1.48744	0.222615	0.47349	calcium release activated channel regulator 2A [Source:MGI Symbol;Acc:MGI:2685919]	Cracr2a	1.78066	0.313339	1.45816	2.24969	1.63468	1.32475
ENSMUSG00000045237	0.723061	3.22547	7.85672	0.00506322	0.0645442	RIKEN cDNA 1110012L19 gene [Source:MGI Symbol;Acc:MGI:1915868]	1110012L19Rik	4.95489	8.1468	7.82106	12.3444	11.4427	10.3772
ENSMUSG00000036218	0.722951	1.14178	2.64602	0.10381	0.31267	PDZ domain containing RING finger 4 [Source:MGI Symbol;Acc:MGI:3056996]	Pdzrn4	0.774201	2.44404	1.52444	1.67285	2.7035	3.09108
ENSMUSG00000079555	0.722951	3.31049	7.64145	0.0057042	0.0686433	HAUS augmin-like complex, subunit 3 [Source:MGI Symbol;Acc:MGI:2387633]	Haus3	5.65167	6.64278	9.6769	14.7672	8.8021	12.8501
ENSMUSG00000051124	0.722749	1.40395	2.64921	0.103601	0.312286	GTPase, IMAP family member 9 [Source:MGI Symbol;Acc:MGI:3511744]	Gimap9	1.23872	2.19337	2.05468	4.15327	1.88616	3.31187
ENSMUSG00000103567	0.722716	4.07646	12.1472	0.000491613	0.0201916	protocadherin gamma subfamily A, 5 [Source:MGI Symbol;Acc:MGI:1935217]	Pcdhga5	15.9485	11.1549	9.21294	35.0144	16.724	12.3643
ENSMUSG00000044566	0.721913	1.57999	3.52781	0.0603475	0.23372	cancer antigen 1 [Source:MGI Symbol;Acc:MGI:1918463]	Cage1	2.24518	2.00537	1.92212	5.71075	3.14361	2.1196
ENSMUSG00000099689	0.718986	3.26304	7.58311	0.00589176	0.0694965	zinc finger protein 383 [Source:MGI Symbol;Acc:MGI:1920979]	Zfp383	6.81297	9.02415	5.30241	16.5554	10.8769	8.12513
ENSMUSG00000017697	0.718762	0.660981	1.54815	0.213409	0.461744	adenosine deaminase [Source:MGI Symbol;Acc:MGI:87916]	Ada	0.541941	1.81736	0.795362	0.692212	1.82329	2.73782
ENSMUSG00000046879	0.718559	4.43437	12.5521	0.000395761	0.0179689	immunity-related GTPase family M member 1 [Source:MGI Symbol;Acc:MGI:107567]	Irgm1	13.1614	17.6096	17.8294	30.1112	22.9483	26.9366
ENSMUSG00000033576	0.718352	0.128527	1.08682	0.297176	0.551133	apolipoprotein L 6 [Source:MGI Symbol;Acc:MGI:1919189]	Apol6	0.929041	0.81468	0.397681	0.576843	1.76042	1.28059
ENSMUSG00000029346	0.718269	2.6421	6.56583	0.0103955	0.0945192	SRR1 domain containing [Source:MGI Symbol;Acc:MGI:1917368]	Srrd	4.2581	5.20142	4.24193	9.22949	7.60753	6.00553
ENSMUSG00000036992	0.718036	2.38445	5.21921	0.0223387	0.139057	NTF2-related export protein 1 [Source:MGI Symbol;Acc:MGI:1929619]	Nxt1	2.7097	3.8854	4.90473	7.26823	5.34413	6.18216
ENSMUSG00000040875	0.717579	1.03457	1.71174	0.19076	0.433547	oxysterol binding protein-like 10 [Source:MGI Symbol;Acc:MGI:1921736]	Osbpl10	1.5484	2.38137	0.596521	2.88422	1.5718	2.38455
ENSMUSG00000070808	0.717488	3.97112	7.65852	0.00565047	0.0683595	BRD4 interacting chromatin remodeling complex associated protein [Source:MGI Symbol;Acc:MGI:2154263]	Bicra	15.484	19.6777	2.91633	28.0923	19.2389	8.03681
ENSMUSG00000024558	0.716895	3.93997	13.2084	0.000278691	0.0149037	mitogen-activated protein kinase 4 [Source:MGI Symbol;Acc:MGI:2444559]	Mapk4	13.6259	13.1602	7.62222	25.4388	18.4215	12.9825
ENSMUSG00000074505	0.716792	2.33229	5.74477	0.0165378	0.12011	FAT atypical cadherin 3 [Source:MGI Symbol;Acc:MGI:2444314]	Fat3	3.17422	5.38942	2.71749	6.11454	6.72732	5.16652
ENSMUSG00000039989	0.716703	3.83206	12.1102	0.00050148	0.0204049	chromobox 4 [Source:MGI Symbol;Acc:MGI:1195985]	Cbx4	11.0711	10.8415	9.80946	21.2278	14.4606	17.0009
ENSMUSG00000037224	0.715009	1.24481	2.82619	0.0927381	0.295922	zinc finger, FYVE domain containing 28 [Source:MGI Symbol;Acc:MGI:2684992]	Zfyve28	2.7097	1.7547	0.596521	4.15327	3.70946	0.750691
ENSMUSG00000044469	0.7147	1.903	4.29109	0.0383126	0.184044	tumor necrosis factor, alpha-induced protein 8-like 1 [Source:MGI Symbol;Acc:MGI:1913693]	Tnfaip8l1	2.40002	2.44404	3.18145	5.99917	3.64659	3.84177
ENSMUSG00000038876	0.713861	5.08361	10.444	0.00123045	0.0328246	ring finger protein 146 [Source:MGI Symbol;Acc:MGI:1915281]	Rnf146	26.9422	16.9203	34.4657	44.4746	43.1303	36.6072
ENSMUSG00000029299	0.7138	0.06199	1.19148	0.27503	0.53109	ATP-binding cassette, sub-family G (WHITE), member 3 [Source:MGI Symbol;Acc:MGI:1351624]	Abcg3	0.15484	0.81468	1.06048	0.40379	1.00595	1.81049
ENSMUSG00000079243	0.713249	9.12979	15.981	6.39824e-05	0.00649843	xin actin-binding repeat containing 1 [Source:MGI Symbol;Acc:MGI:1333878]	Xirp1	475.824	471.637	304.358	1021.01	575.092	512.325
ENSMUSG00000030745	0.712754	1.23762	2.39309	0.121873	0.342069	interleukin 21 receptor [Source:MGI Symbol;Acc:MGI:1890475]	Il21r	0.929041	1.44136	2.85005	2.88422	2.51489	2.60534
ENSMUSG00000093938	0.712342	1.54842	0.178379	0.67277	0.834276	ecotropic viral integration site 2b [Source:MGI Symbol;Acc:MGI:1890682]	Evi2b	0	3.63473	2.85005	4.61475	0	5.07821
ENSMUSG00000035486	0.712212	-0.263207	0.85161	0.356097	0.603881	polo-like kinase 5 [Source:MGI Symbol;Acc:MGI:3026984]	Plk5	0.464521	0.689345	0.331401	0.692212	0.502977	1.36891
ENSMUSG00000037979	0.71204	-0.268355	0.817381	0.365947	0.613204	coiled-coil domain containing 92 [Source:MGI Symbol;Acc:MGI:106485]	Ccdc92	0.23226	0.56401	0.795362	1.21137	0.88021	0.5299
ENSMUSG00000072812	0.711173	5.6081	13.6493	0.000220329	0.0134895	AHNAK nucleoprotein 2 [Source:MGI Symbol;Acc:MGI:2144831]	Ahnak2	36.6971	30.3312	40.2983	79.9505	35.7114	68.4454
ENSMUSG00000034800	0.710043	1.99316	3.54939	0.0595672	0.232	zinc finger protein 661 [Source:MGI Symbol;Acc:MGI:1919430]	Zfp661	1.70324	3.8854	3.18145	5.76843	3.96095	4.37167
ENSMUSG00000035367	0.709633	3.69137	8.5376	0.00347884	0.0542856	RecQ mediated genome instability 1 [Source:MGI Symbol;Acc:MGI:1921636]	Rmi1	9.13557	8.89882	10.1409	23.3622	11.4427	13.5124
ENSMUSG00000089762	0.708572	3.7594	12.8102	0.000344726	0.0169161	immediate early response 5-like [Source:MGI Symbol;Acc:MGI:1919750]	Ier5l	11.3033	10.7162	8.41758	19.3819	17.1641	13.38
ENSMUSG00000002068	0.707907	0.978327	1.88903	0.169311	0.407628	cyclin E1 [Source:MGI Symbol;Acc:MGI:88316]	Ccne1	0.929041	0.81468	2.71749	2.24969	2.07478	2.16376
ENSMUSG00000025058	0.70741	0.676565	1.75949	0.184688	0.42662	RIKEN cDNA 5430427O19 gene [Source:MGI Symbol;Acc:MGI:1918648]	5430427O19Rik	1.39356	0.689345	1.25932	1.32674	1.88616	2.16376
ENSMUSG00000051457	0.707346	1.73355	3.95447	0.046747	0.203549	sialophorin [Source:MGI Symbol;Acc:MGI:98384]	Spn	2.16776	1.37869	3.57913	4.84548	1.94904	4.94573
ENSMUSG00000055994	0.707293	2.45966	5.21097	0.0224448	0.139392	nucleotide-binding oligomerization domain containing 2 [Source:MGI Symbol;Acc:MGI:2429397]	Nod2	4.18068	5.07609	2.85005	9.28718	5.34413	5.34316
ENSMUSG00000022876	0.707085	0.394868	1.1597	0.281528	0.537929	SAM domain, SH3 domain and nuclear localization signals, 1 [Source:MGI Symbol;Acc:MGI:1914992]	Samsn1	0	0.689345	2.25353	0.288422	0.943082	2.60534
ENSMUSG00000026090	0.706966	0.561301	1.66656	0.19672	0.441567	RIKEN cDNA 2010300C02 gene [Source:MGI Symbol;Acc:MGI:1919347]	2010300C02Rik	1.70324	1.31602	0.265121	2.48043	1.69755	0.750691
ENSMUSG00000033739	0.706732	2.35138	5.08189	0.0241769	0.143951	FK506 binding protein-like [Source:MGI Symbol;Acc:MGI:1932127]	Fkbpl	3.32906	3.25872	4.50705	8.36423	4.71541	5.47563
ENSMUSG00000097333	0.706618	2.75307	4.96613	0.0258485	0.14972	zinc finger protein 87 [Source:MGI Symbol;Acc:MGI:107768]	Zfp87	4.33552	5.07609	4.97101	12.9213	6.0986	6.09385
ENSMUSG00000024790	0.706578	3.41721	8.40856	0.00373459	0.056133	SAC3 domain containing 1 [Source:MGI Symbol;Acc:MGI:1913656]	Sac3d1	6.96781	9.77616	7.15826	16.0939	11.8828	11.2162
ENSMUSG00000027456	0.706332	-0.0181915	0.555637	0.456024	0.687301	syndecan binding protein (syntenin) 2 [Source:MGI Symbol;Acc:MGI:2385156]	Sdcbp2	0.851621	0	1.72328	1.44211	0.628722	0.618216
ENSMUSG00000039208	0.706273	4.43141	12.5178	0.000403089	0.0181487	meteorin, glial cell differentiation regulator-like [Source:MGI Symbol;Acc:MGI:2384806]	Metrnl	15.2518	19.051	14.4491	30.8034	22.9483	25.8768
ENSMUSG00000039640	0.705519	6.63649	15.2557	9.38952e-05	0.00821377	mitochondrial ribosomal protein L12 [Source:MGI Symbol;Acc:MGI:1926273]	Mrpl12	72.0781	83.1601	68.9314	155.921	119.709	96.1768
ENSMUSG00000001348	0.704882	0.392608	0.71386	0.398165	0.64022	acid phosphatase 5, tartrate resistant [Source:MGI Symbol;Acc:MGI:87883]	Acp5	0	1.31602	1.92212	1.21137	1.00595	1.50138
ENSMUSG00000031153	0.703685	4.8773	16.124	5.9328e-05	0.00634247	GRIP1 associated protein 1 [Source:MGI Symbol;Acc:MGI:1859616]	Gripap1	24.6196	23.5631	17.6305	49.0894	34.6426	25.9209
ENSMUSG00000036850	0.703239	5.2237	16.8933	3.95407e-05	0.00513108	mitochondrial ribosomal protein L41 [Source:MGI Symbol;Acc:MGI:1333816]	Mrpl41	29.1874	24.5031	30.9528	55.3193	40.9298	42.3037
ENSMUSG00000040302	0.703088	2.64938	6.4767	0.0109298	0.0976155	RNA binding motif protein 48 [Source:MGI Symbol;Acc:MGI:2442653]	Rbm48	3.4839	4.76275	5.70009	7.09517	6.60158	8.87582
ENSMUSG00000044177	0.702684	2.82321	6.25887	0.0123573	0.103907	WAP, follistatin/kazal, immunoglobulin, kunitz and netrin domain containing 2 [Source:MGI Symbol;Acc:MGI:2669209]	Wfikkn2	7.97427	5.6401	2.85005	9.34486	9.24221	6.6679
ENSMUSG00000032036	0.70265	0.0822857	1.08191	0.298271	0.551924	kin of IRRE like 3 (Drosophila) [Source:MGI Symbol;Acc:MGI:1914953]	Kirrel3	1.08388	0.752013	0.331401	1.096	0.88021	1.36891
ENSMUSG00000095098	0.701803	4.41362	13.579	0.000228731	0.0135494	coiled-coil domain containing 85B [Source:MGI Symbol;Acc:MGI:2147607]	Ccdc85b	18.0389	17.4843	11.9304	37.2064	25.1489	17.2217
ENSMUSG00000054951	0.701383	0.657405	1.69598	0.192815	0.436443	RIKEN cDNA 9130008F23 gene [Source:MGI Symbol;Acc:MGI:1918833]	9130008F23Rik	0.696781	1.31602	1.25932	2.192	1.63468	1.50138
ENSMUSG00000040715	0.701295	5.28069	15.3865	8.76129e-05	0.00819932	regulatory solute carrier protein, family 1, member 1 [Source:MGI Symbol;Acc:MGI:3526447]	Rsc1a1	32.2842	30.3938	24.126	67.9521	41.7471	35.8124
ENSMUSG00000109511	0.700854	4.73338	12.9703	0.000316475	0.0160095	nucleoporin 62 [Source:MGI Symbol;Acc:MGI:1351500]	Nup62	19.5099	21.495	18.6247	43.0902	28.7326	27.1574
ENSMUSG00000049657	0.700611	3.85052	8.01958	0.00462742	0.0619217	zinc finger and BTB domain containing 5 [Source:MGI Symbol;Acc:MGI:1924601]	Zbtb5	11.1485	13.0349	7.95362	25.4388	12.9517	15.0138
ENSMUSG00000051518	0.700394	3.22263	9.03171	0.00265336	0.0477532	ribosomal protein S19 binding protein 1 [Source:MGI Symbol;Acc:MGI:1913788]	Rps19bp1	6.19361	7.20679	7.55594	11.6522	11.4427	10.9513
ENSMUSG00000035692	0.700358	1.07891	2.41938	0.119842	0.338558	ISG15 ubiquitin-like modifier [Source:MGI Symbol;Acc:MGI:1855694]	Isg15	0.774201	1.7547	2.05468	1.96127	2.82925	2.38455
ENSMUSG00000034459	0.700182	3.16781	7.80407	0.00521287	0.0656091	interferon-induced protein with tetratricopeptide repeats 1 [Source:MGI Symbol;Acc:MGI:99450]	Ifit1	4.80005	4.44941	11.2013	10.4985	6.72732	14.9697
ENSMUSG00000005580	0.699209	6.14871	14.3395	0.000152632	0.0109047	adenylate cyclase 9 [Source:MGI Symbol;Acc:MGI:108450]	Adcy9	60.3102	59.973	40.2983	120.041	71.6743	72.4196
ENSMUSG00000029163	0.698569	6.7392	14.9783	0.000108755	0.00877035	elastin microfibril interfacer 1 [Source:MGI Symbol;Acc:MGI:1926189]	Emilin1	89.4976	73.1332	75.5594	190.301	96.7603	114.723
ENSMUSG00000103677	0.697687	4.30021	11.8886	0.000564795	0.0220037	protocadherin gamma subfamily A, 4 [Source:MGI Symbol;Acc:MGI:1935216]	Pcdhga4	21.755	10.9042	9.61062	46.6089	14.9636	13.6008
ENSMUSG00000051817	0.696898	3.44845	9.32747	0.00225744	0.0442108	SRY (sex determining region Y)-box 12 [Source:MGI Symbol;Acc:MGI:98360]	Sox12	10.2969	10.5908	3.84425	19.4973	13.8947	6.6679
ENSMUSG00000071342	0.696561	4.3546	12.2693	0.000460475	0.0197162	leucine-rich single-pass membrane protein 1 [Source:MGI Symbol;Acc:MGI:2685735]	Lsmem1	13.0066	14.4762	18.691	28.2653	18.8616	28.2613
ENSMUSG00000090053	0.69604	3.23114	3.075	0.0795045	0.270471	paralemmin 2 [Source:MGI Symbol;Acc:MGI:1934601]	Palm2	13.8582	8.1468	2.12096	10.3832	11.1912	9.97978
ENSMUSG00000063382	0.695054	5.86267	13.88	0.000194862	0.0126174	B cell CLL/lymphoma 9-like [Source:MGI Symbol;Acc:MGI:1933114]	Bcl9l	68.0523	55.5863	12.3944	121.195	65.9529	25.391
ENSMUSG00000074896	0.695037	3.66292	8.00763	0.00465807	0.0621487	interferon-induced protein with tetratricopeptide repeats 3 [Source:MGI Symbol;Acc:MGI:1101055]	Ifit3	6.65813	6.95612	16.0398	15.7478	11.82	17.6192
ENSMUSG00000078945	0.69468	2.83698	5.24949	0.0219532	0.138084	NLR family, apoptosis inhibitory protein 2 [Source:MGI Symbol;Acc:MGI:1298226]	Naip2	5.03231	5.07609	5.16985	13.9019	5.78424	6.93285
ENSMUSG00000093674	0.694462	6.78588	3.68149	0.0550196	0.223109	ribosomal protein L41 [Source:MGI Symbol;Acc:MGI:1915195]	Rpl41	64.1813	65.0491	98.0946	98.9286	269.407	65.7517
ENSMUSG00000045350	0.694053	0.588324	1.18129	0.277094	0.533278	family with sequence similarity 186, member A [Source:MGI Symbol;Acc:MGI:2685766]	Fam186a	2.7097	1.00268	0.0662802	2.99959	0.943082	0.750691
ENSMUSG00000072568	0.693677	3.69848	10.8314	0.000997939	0.0299775	family with sequence similarity 84, member B [Source:MGI Symbol;Acc:MGI:3026924]	Fam84b	11.1485	11.9069	6.56174	19.555	15.8438	12.0111
ENSMUSG00000027995	0.693577	3.1768	7.42663	0.00642658	0.073282	toll-like receptor 2 [Source:MGI Symbol;Acc:MGI:1346060]	Tlr2	5.57425	5.26409	9.87574	11.1908	9.87093	11.437
ENSMUSG00000058192	0.693577	2.75628	4.63333	0.0313567	0.165726	zinc finger protein 846 [Source:MGI Symbol;Acc:MGI:1924012]	Zfp846	4.18068	5.89077	4.57333	12.4598	6.0986	6.3588
ENSMUSG00000055228	0.692957	2.4543	5.69919	0.0169727	0.12185	zinc finger protein 935 [Source:MGI Symbol;Acc:MGI:1918758]	Zfp935	4.41294	3.13339	4.70589	7.61433	6.35009	5.78474
ENSMUSG00000070720	0.692925	2.99302	7.98372	0.00471998	0.0626501	transmembrane protein 200B [Source:MGI Symbol;Acc:MGI:3646343]	Tmem200b	6.81297	6.07877	4.90473	11.883	10.2482	7.02117
ENSMUSG00000047515	0.692721	0.746076	1.83625	0.175391	0.415825	cDNA sequence BC049715 [Source:MGI Symbol;Acc:MGI:3605234]	BC049715	1.39356	1.56669	0.662802	2.01895	1.82329	1.76633
ENSMUSG00000024352	0.692584	1.94157	4.47391	0.0344162	0.174168	spermatogenesis associated 24 [Source:MGI Symbol;Acc:MGI:1918492]	Spata24	2.78712	3.00805	2.58493	5.5377	3.70946	4.45999
ENSMUSG00000045664	0.692	4.01289	9.9814	0.00158129	0.0371637	CDC42 effector protein (Rho GTPase binding) 2 [Source:MGI Symbol;Acc:MGI:1929744]	Cdc42ep2	10.4517	14.5389	11.4665	24.5735	18.3587	16.471
ENSMUSG00000069830	0.691835	-0.0576301	0.670823	0.412765	0.651616	NLR family, pyrin domain containing 1A [Source:MGI Symbol;Acc:MGI:2684861]	Nlrp1a	0.3871	0.188003	1.59072	1.61516	0.565849	0.662375
ENSMUSG00000046010	0.691412	3.6841	10.4037	0.00125765	0.0332743	zinc finger protein 830 [Source:MGI Symbol;Acc:MGI:1914233]	Zfp830	13.3163	6.64278	9.6769	17.4784	13.1403	15.9411
ENSMUSG00000023980	0.691389	4.26848	12.87	0.000333898	0.0165709	TATA-box binding protein associated factor 8 [Source:MGI Symbol;Acc:MGI:1926879]	Taf8	15.7937	14.0376	13.5212	30.515	18.673	22.0792
ENSMUSG00000068264	0.690878	4.1312	10.9588	0.000931606	0.0294092	adaptor-related protein 5 complex, sigma 1 subunit [Source:MGI Symbol;Acc:MGI:1916846]	Ap5s1	11.9227	17.735	10.6711	22.0354	20.8736	20.8427
ENSMUSG00000032384	0.690842	4.1982	13.5945	0.000226848	0.0135494	casein kinase 1, gamma 1 [Source:MGI Symbol;Acc:MGI:2660884]	Csnk1g1	18.1163	15.2909	8.15246	32.2455	22.5711	13.0267
ENSMUSG00000052446	0.690623	2.70643	1.5247	0.21691	0.465971	zinc finger protein 961 [Source:MGI Symbol;Acc:MGI:3583954]	Zfp961	3.40648	2.31871	10.4723	10.4985	8.29913	3.48851
ENSMUSG00000027243	0.689942	3.55046	7.72702	0.00544004	0.0672409	harbinger transposase derived 1 [Source:MGI Symbol;Acc:MGI:2443194]	Harbi1	7.81943	7.7708	10.8037	17.9398	13.4546	11.5695
ENSMUSG00000034161	0.68841	3.32835	8.55393	0.00344777	0.0542856	scleraxis [Source:MGI Symbol;Acc:MGI:102934]	Scx	5.10973	8.08414	9.74318	10.7293	12.0086	13.4683
ENSMUSG00000019761	0.688285	-0.152921	0.946583	0.33059	0.582047	keratin 10 [Source:MGI Symbol;Acc:MGI:96685]	Krt10	0.929041	0.313339	0.596521	0.807581	1.1317	0.883166
ENSMUSG00000045733	0.688137	0.842711	1.87972	0.170366	0.409342	shadow of prion protein [Source:MGI Symbol;Acc:MGI:3582583]	Sprn	1.47098	1.56669	0.795362	1.8459	1.88616	2.29623
ENSMUSG00000038611	0.687763	5.42818	9.81124	0.00173449	0.0389131	PHD and ring finger domains 1 [Source:MGI Symbol;Acc:MGI:2141847]	Phrf1	26.8648	42.3007	29.2958	68.0675	44.765	45.9688
ENSMUSG00000046275	0.687412	2.39472	5.39746	0.0201661	0.132839	tumor suppressor candidate 5 [Source:MGI Symbol;Acc:MGI:3029307]	Tusc5	5.10973	3.38406	3.38029	6.05685	6.66445	6.09385
ENSMUSG00000038910	0.68698	4.89899	14.2873	0.000156918	0.0109944	phospholipase C-like 2 [Source:MGI Symbol;Acc:MGI:1352756]	Plcl2	21.2905	21.4324	24.9876	44.7054	30.4301	35.1059
ENSMUSG00000034379	0.686726	2.88004	7.42747	0.00642357	0.073282	WD repeat domain 5B [Source:MGI Symbol;Acc:MGI:1916794]	Wdr5b	7.12265	5.07609	4.30821	12.2868	7.60753	6.93285
ENSMUSG00000052957	0.686582	5.25901	16.4612	4.96569e-05	0.00581238	growth arrest specific 1 [Source:MGI Symbol;Acc:MGI:95655]	Gas1	34.7616	30.8952	20.4143	64.7795	50.2349	27.908
ENSMUSG00000045757	0.685556	2.78098	5.53242	0.0186673	0.127985	zinc finger protein 764 [Source:MGI Symbol;Acc:MGI:2443580]	Zfp764	4.56779	5.13875	5.36869	10.8447	5.53275	8.69919
ENSMUSG00000021408	0.685552	4.28614	14.0997	0.000173368	0.0117086	receptor (TNFRSF)-interacting serine-threonine kinase 1 [Source:MGI Symbol;Acc:MGI:108212]	Ripk1	15.7937	14.1629	14.3828	27.8615	21.2508	22.6091
ENSMUSG00000020135	0.685319	3.87102	9.29985	0.00229173	0.0444076	adenomatosis polyposis coli 2 [Source:MGI Symbol;Acc:MGI:1346052]	Apc2	16.8002	12.3455	5.36869	24.1697	15.5923	12.7618
ENSMUSG00000025930	0.685226	1.4994	2.09783	0.147508	0.377471	musculin [Source:MGI Symbol;Acc:MGI:1333884]	Msc	1.78066	1.62936	2.51865	4.49938	4.33818	1.50138
ENSMUSG00000002831	0.684685	9.42246	14.6102	0.000132199	0.00997986	perilipin 4 [Source:MGI Symbol;Acc:MGI:1929709]	Plin4	515.231	512.434	519.172	1170.7	658.712	739.828
ENSMUSG00000035623	0.684631	5.81181	12.1925	0.000479831	0.0201051	remodeling and spacing factor 1 [Source:MGI Symbol;Acc:MGI:2682305]	Rsf1	43.6649	46.1861	34.7971	102.967	65.0098	43.5401
ENSMUSG00000062012	0.684606	2.2139	3.62389	0.0569556	0.227302	zinc finger protein 13 [Source:MGI Symbol;Acc:MGI:99159]	Zfp13	3.32906	2.88272	3.44657	9.86402	4.21243	3.26771
ENSMUSG00000030339	0.684301	5.33866	15.1739	9.80497e-05	0.00831534	lymphotoxin B receptor [Source:MGI Symbol;Acc:MGI:104875]	Ltbr	25.2389	32.6499	34.9296	50.6468	42.8159	55.3304
ENSMUSG00000030653	0.684122	5.43378	8.46398	0.00362248	0.055154	predicted gene 45837 [Source:MGI Symbol;Acc:MGI:5804952]	Gm45837	42.4262	20.931	37.5146	54.9155	60.1687	42.6128
ENSMUSG00000029553	0.684027	0.288196	0.95507	0.328432	0.579857	transcription factor EC [Source:MGI Symbol;Acc:MGI:1333760]	Tfec	0.23226	1.06535	1.25932	1.55748	0.817338	1.45722
ENSMUSG00000042814	0.683839	3.09209	7.37116	0.0066278	0.0739672	malignant T cell amplified sequence 2 [Source:MGI Symbol;Acc:MGI:1913655]	Mcts2	5.49683	6.0161	7.55594	11.5946	7.6704	11.702
ENSMUSG00000060733	0.683645	3.89998	10.0801	0.00149881	0.0362984	inositol polyphosphate multikinase [Source:MGI Symbol;Acc:MGI:1916968]	Ipmk	10.7614	8.20947	14.8468	23.3622	12.4487	18.8556
ENSMUSG00000025171	0.683263	4.11097	12.6468	0.000376202	0.017417	ubiquitin domain containing 1 [Source:MGI Symbol;Acc:MGI:2385092]	Ubtd1	12.9292	12.4709	13.9188	23.016	21.7538	18.6348
ENSMUSG00000078995	0.683018	1.35228	2.88855	0.0892109	0.289174	zinc finger protein 456 [Source:MGI Symbol;Acc:MGI:3040694]	Zfp456	2.3226	1.88003	1.3256	3.74948	2.13765	3.00276
ENSMUSG00000043432	0.682173	2.34676	5.21751	0.0223606	0.139111	leukocyte receptor cluster (LRC) member 9 [Source:MGI Symbol;Acc:MGI:2444509]	Leng9	4.02584	3.32139	3.77797	8.71033	4.65254	5.12236
ENSMUSG00000102748	0.682109	4.44147	11.7611	0.00060483	0.0229722	protocadherin gamma subfamily B, 2 [Source:MGI Symbol;Acc:MGI:1935170]	Pcdhgb2	24.5422	16.6069	8.6827	42.398	19.9305	17.4425
ENSMUSG00000039883	0.681738	3.19468	6.81961	0.00901624	0.0871814	leucine rich repeat containing 17 [Source:MGI Symbol;Acc:MGI:1921761]	Lrrc17	7.58717	5.57743	6.82686	17.7091	8.17338	8.16929
ENSMUSG00000002803	0.681606	4.58213	14.1585	0.000168032	0.0115265	BTB (POZ) domain containing 6 [Source:MGI Symbol;Acc:MGI:3026623]	Btbd6	19.9744	17.6723	16.57	38.3601	26.5949	23.6247
ENSMUSG00000046694	0.681444	3.72673	7.95205	0.00480329	0.0631221	family with sequence similarity 46, member B [Source:MGI Symbol;Acc:MGI:2140500]	Fam46b	7.58717	9.9015	12.5269	19.4396	12.3858	16.471
ENSMUSG00000046058	0.68066	2.97353	7.58384	0.00588938	0.0694965	EP300 interacting inhibitor of differentiation 2 [Source:MGI Symbol;Acc:MGI:2681174]	Eid2	5.96135	5.6401	6.09777	10.4985	9.43082	8.56671
ENSMUSG00000045534	0.680274	5.21605	12.3617	0.000438236	0.0190825	potassium voltage-gated channel, shaker-related subfamily, member 5 [Source:MGI Symbol;Acc:MGI:96662]	Kcna5	27.639	28.0751	27.9702	61.7222	34.0138	42.5244
ENSMUSG00000078173	0.679837	0.481806	1.16489	0.280454	0.537209	lens epithelial protein [Source:MGI Symbol;Acc:MGI:1930020]	Lenep	0.464521	1.06535	1.39188	2.07664	1.50893	1.0598
ENSMUSG00000015829	0.679672	-0.172862	0.957014	0.32794	0.579763	tenascin R [Source:MGI Symbol;Acc:MGI:99516]	Tnr	1.08388	0.626677	0.19884	1.03832	1.19457	0.5299
ENSMUSG00000042213	0.679356	2.38295	5.47672	0.0192714	0.129484	zinc finger, AN1-type domain 4 [Source:MGI Symbol;Acc:MGI:1914742]	Zfand4	5.80651	3.19605	2.85005	8.07581	6.47583	4.19504
ENSMUSG00000030760	0.679308	3.58126	3.45671	0.0629954	0.239029	alkaline ceramidase 3 [Source:MGI Symbol;Acc:MGI:1913440]	Acer3	5.49683	4.51208	21.4085	11.4792	14.3349	13.6449
ENSMUSG00000092118	0.679245	1.47507	3.26004	0.0709876	0.254185	Fanconi anemia, complementation group F [Source:MGI Symbol;Acc:MGI:3689889]	Fancf	1.9355	1.9427	2.05468	3.98022	2.20053	3.57682
ENSMUSG00000049184	0.678916	2.68351	5.72051	0.0167678	0.121042	purine-rich element binding protein G [Source:MGI Symbol;Acc:MGI:1922279]	Purg	5.49683	5.45209	3.44657	10.5562	6.28722	6.40295
ENSMUSG00000044636	0.677612	2.95308	5.23829	0.022095	0.138247	cysteine-serine-rich nuclear protein 2 [Source:MGI Symbol;Acc:MGI:2386852]	Csrnp2	5.57425	5.20142	6.16405	14.0173	8.61349	6.04969
ENSMUSG00000030616	0.676625	1.02986	2.28087	0.130978	0.354691	synaptotagmin-like 2 [Source:MGI Symbol;Acc:MGI:1933366]	Sytl2	1.39356	1.69203	1.25932	2.99959	2.01191	2.03128
ENSMUSG00000017830	0.676318	1.69994	3.226	0.0724775	0.256579	DEXH (Asp-Glu-X-His) box polypeptide 58 [Source:MGI Symbol;Acc:MGI:1931560]	Dhx58	1.39356	1.7547	4.24193	3.63411	2.76638	4.63662
ENSMUSG00000025529	0.67586	-0.258827	0.938382	0.332694	0.583366	zinc finger protein 711 [Source:MGI Symbol;Acc:MGI:3045342]	Zfp711	0.3871	0.501342	0.729082	1.03832	0.754466	0.79485
ENSMUSG00000045639	0.674675	5.69422	14.5708	0.000134987	0.0100489	zinc finger protein 629 [Source:MGI Symbol;Acc:MGI:2444524]	Zfp629	41.1101	33.4019	43.4798	83.873	51.4923	56.3018
ENSMUSG00000043140	0.674352	5.02971	16.1383	5.88824e-05	0.00634247	transmembrane protein 186 [Source:MGI Symbol;Acc:MGI:1913940]	Tmem186	24.3873	26.1324	24.3911	45.2245	38.2891	36.5631
ENSMUSG00000056749	0.673545	4.20275	11.8792	0.000567641	0.0220037	nuclear factor, interleukin 3, regulated [Source:MGI Symbol;Acc:MGI:109495]	Nfil3	15.7163	12.3455	13.4549	30.1112	15.9695	21.8584
ENSMUSG00000039960	0.673514	3.28119	8.18156	0.00423184	0.059491	ras homolog family member U [Source:MGI Symbol;Acc:MGI:1916831]	Rhou	6.58071	8.27214	7.22454	12.9213	11.7571	10.598
ENSMUSG00000007877	0.673176	10.2385	17.1476	3.45855e-05	0.00467154	titin-cap [Source:MGI Symbol;Acc:MGI:1330233]	Tcap	935.544	962.514	833.672	2051.83	1411.23	1052.73
ENSMUSG00000045045	0.672938	4.55802	12.8418	0.000338962	0.0166958	leucine rich repeat and fibronectin type III domain containing 4 [Source:MGI Symbol;Acc:MGI:2385612]	Lrfn4	17.5744	18.3616	17.7631	34.4952	23.9543	28.1288
ENSMUSG00000049307	0.672753	0.898599	1.91244	0.166693	0.403959	fucosyltransferase 4 [Source:MGI Symbol;Acc:MGI:95594]	Fut4	0.774201	1.19069	2.12096	1.90358	2.07478	2.20792
ENSMUSG00000032014	0.672525	4.10347	12.7382	0.000358255	0.0169545	out at first homolog [Source:MGI Symbol;Acc:MGI:94852]	Oaf	13.5485	12.2202	13.5212	23.6506	20.4335	18.8114
ENSMUSG00000078771	0.67191	1.80054	2.11279	0.146073	0.375337	ecotropic viral integration site 2a [Source:MGI Symbol;Acc:MGI:95458]	Evi2a	2.16776	0	5.83265	5.71075	0	6.00553
ENSMUSG00000030054	0.671521	-1.26908	0.285909	0.592854	0.784737	glycoprotein 9 (platelet) [Source:MGI Symbol;Acc:MGI:1860137]	Gp9	0	0	0.795362	0	0.125744	0.706533
ENSMUSG00000007033	0.66864	4.03044	9.7254	0.00181738	0.039657	heat shock protein 1-like [Source:MGI Symbol;Acc:MGI:96231]	Hspa1l	13.0066	9.83883	14.2502	26.9963	16.5983	16.4269
ENSMUSG00000046070	0.668546	3.21432	7.57698	0.00591185	0.0695258	insulin-like growth factor binding protein, acid labile subunit [Source:MGI Symbol;Acc:MGI:107973]	Igfals	6.81297	8.46014	5.63381	13.9596	12.5744	7.4186
ENSMUSG00000021277	0.666797	4.74805	13.4806	0.000241037	0.0139122	TNF receptor-associated factor 3 [Source:MGI Symbol;Acc:MGI:108041]	Traf3	20.9808	15.6669	25.1202	40.3213	24.5201	33.5603
ENSMUSG00000039693	0.666482	3.84264	9.28182	0.0023144	0.0446358	Myb/SANT-like DNA-binding domain containing 3 [Source:MGI Symbol;Acc:MGI:1913915]	Msantd3	10.4517	11.8442	10.1409	23.1314	15.6552	13.9099
ENSMUSG00000026697	0.666209	2.69425	5.90285	0.0151164	0.114482	myocilin [Source:MGI Symbol;Acc:MGI:1202864]	Myoc	5.88393	6.07877	2.78377	10.7293	7.73328	4.85741
ENSMUSG00000039616	0.665881	3.05416	5.68929	0.0170687	0.122183	molybdenum cofactor sulfurase [Source:MGI Symbol;Acc:MGI:1915841]	Mocos	6.65813	6.70545	5.03729	14.7672	6.66445	9.00829
ENSMUSG00000047085	0.665526	4.47022	9.96339	0.00159683	0.0372374	leucine rich repeat containing 4B [Source:MGI Symbol;Acc:MGI:3027390]	Lrrc4b	14.9421	17.1083	18.4259	34.7837	24.583	22.1675
ENSMUSG00000033233	0.665348	2.81457	3.96283	0.0465154	0.202773	tripartite motif-containing 45 [Source:MGI Symbol;Acc:MGI:1918187]	Trim45	5.26457	4.19874	5.63381	14.248	7.48179	4.59246
ENSMUSG00000047514	0.665079	6.61957	11.0231	0.000899822	0.0290986	testis-specific protein, Y-encoded-like 1 [Source:MGI Symbol;Acc:MGI:1298395]	Tspyl1	69.2136	81.468	73.5047	162.843	98.2692	103.64
ENSMUSG00000016496	0.665013	2.46326	5.3077	0.0212313	0.13619	CD274 antigen [Source:MGI Symbol;Acc:MGI:1926446]	Cd274	4.56779	3.63473	3.97681	8.94107	4.40105	6.57959
ENSMUSG00000052013	0.665006	0.325382	0.772817	0.379347	0.623927	B and T lymphocyte associated [Source:MGI Symbol;Acc:MGI:2658978]	Btla	0.696781	0	2.25353	0.461475	0.565849	2.51702
ENSMUSG00000060301	0.664816	5.24067	9.05455	0.00262041	0.0473554	RIKEN cDNA 2610008E11 gene [Source:MGI Symbol;Acc:MGI:1919378]	2610008E11Rik	27.097	26.4458	30.6877	71.2401	34.2653	36.1215
ENSMUSG00000005043	0.664807	3.64253	9.70381	0.00183886	0.0399266	N-sulfoglucosamine sulfohydrolase (sulfamidase) [Source:MGI Symbol;Acc:MGI:1350341]	Sgsh	10.0646	9.9015	8.48386	18.4013	12.8259	14.2631
ENSMUSG00000038233	0.664485	0.93476	2.17413	0.140349	0.367794	family with sequence similarity 198, member A [Source:MGI Symbol;Acc:MGI:3041196]	Fam198a	1.78066	1.12802	1.19304	2.99959	1.76042	1.81049
ENSMUSG00000070705	0.664421	3.32236	5.91496	0.0150129	0.113962	EP300 interacting inhibitor of differentiation 2B [Source:MGI Symbol;Acc:MGI:1924095]	Eid2b	6.03877	7.58279	9.08038	14.1903	13.4546	8.7875
ENSMUSG00000020123	0.664165	0.750912	1.14345	0.284925	0.540018	arginine vasopressin receptor 1A [Source:MGI Symbol;Acc:MGI:1859216]	Avpr1a	0.774201	1.88003	0.861642	2.01895	0.943082	2.56118
ENSMUSG00000045102	0.663968	-0.422925	0.565573	0.452023	0.684118	DNA polymerase N [Source:MGI Symbol;Acc:MGI:2675617]	Poln	0.23226	0.689345	0.397681	0.807581	0.251489	1.14812
ENSMUSG00000058748	0.663833	3.29607	5.59871	0.0179737	0.125195	zinc finger protein 958 [Source:MGI Symbol;Acc:MGI:2385298]	Zfp958	5.26457	5.51476	12.3281	13.4981	8.92785	12.3202
ENSMUSG00000036114	0.663677	3.85698	10.3088	0.00132396	0.033733	ribonuclease P/MRP 25 subunit-like [Source:MGI Symbol;Acc:MGI:1917211]	Rpp25l	11.4582	10.4028	11.1351	21.8047	16.7869	14.4398
ENSMUSG00000041117	0.663476	3.88569	8.71204	0.00316116	0.0517719	coiled-coil domain containing 8 [Source:MGI Symbol;Acc:MGI:3612184]	Ccdc8	11.0711	13.4109	8.6827	25.5542	18.0443	11.0837
ENSMUSG00000023243	0.662642	0.0585914	0.724949	0.394525	0.636899	potassium channel, subfamily K, member 5 [Source:MGI Symbol;Acc:MGI:1336175]	Kcnk5	0.30968	1.19069	0.596521	1.32674	0.502977	1.36891
ENSMUSG00000050761	0.662451	0.409402	1.0081	0.315358	0.568103	glycoprotein Ib, beta polypeptide [Source:MGI Symbol;Acc:MGI:107852]	Gp1bb	0.23226	1.00268	1.78956	1.38442	1.32032	1.36891
ENSMUSG00000079083	0.661426	3.62256	6.20535	0.0127365	0.104952	Jrk-like [Source:MGI Symbol;Acc:MGI:1924782]	Jrkl	8.36137	8.64815	10.1409	23.1891	10.1853	12.3643
ENSMUSG00000050737	0.661327	1.45847	2.87946	0.0897162	0.289951	prostaglandin E synthase [Source:MGI Symbol;Acc:MGI:1927593]	Ptges	3.01938	2.63204	0.729082	4.44169	3.08074	1.89881
ENSMUSG00000025145	0.660872	3.56726	10.0305	0.00153973	0.0368614	leucine rich repeat containing 45 [Source:MGI Symbol;Acc:MGI:2387183]	Lrrc45	10.9162	7.64546	8.48386	18.2282	11.0655	13.8216
ENSMUSG00000033955	0.660272	6.36623	16.4684	4.94675e-05	0.00581238	tankyrase 1 binding protein 1 [Source:MGI Symbol;Acc:MGI:2446193]	Tnks1bp1	73.8588	60.4117	56.0067	128.636	86.3864	88.714
ENSMUSG00000064128	0.660016	3.14883	5.59673	0.0179941	0.125203	centromere protein J [Source:MGI Symbol;Acc:MGI:2684927]	Cenpj	6.42587	6.95612	6.09777	16.3823	9.9338	6.57959
ENSMUSG00000050947	0.660006	4.5724	7.0111	0.00810058	0.0818302	adhesion molecule with Ig like domain 1 [Source:MGI Symbol;Acc:MGI:2653612]	Amigo1	11.7679	28.1378	16.4375	33.5146	29.487	22.3883
ENSMUSG00000032288	0.659117	4.86728	11.141	0.000844384	0.0278668	IMP3, U3 small nucleolar ribonucleoprotein [Source:MGI Symbol;Acc:MGI:1916119]	Imp3	21.8325	19.615	25.7167	43.0325	35.7114	28.3055
ENSMUSG00000054978	0.658422	2.34073	5.13917	0.0233918	0.142343	kelch repeat and BTB (POZ) domain containing 13 [Source:MGI Symbol;Acc:MGI:1921742]	Kbtbd13	5.10973	2.56938	3.91053	7.26823	5.02977	5.65226
ENSMUSG00000058331	0.658334	1.90703	4.21756	0.0400078	0.187658	zinc finger protein 85 [Source:MGI Symbol;Acc:MGI:107767]	Zfp85	2.86454	2.82005	2.65121	5.19159	3.96095	4.10672
ENSMUSG00000027463	0.657975	0.344827	1.14895	0.283769	0.539523	solute carrier protein family 52, member 3 [Source:MGI Symbol;Acc:MGI:1916948]	Slc52a3	1.00646	0.81468	0.662802	1.32674	0.754466	2.07544
ENSMUSG00000008301	0.65794	4.55115	8.13028	0.00435321	0.0601009	phosphorylated adaptor for RNA export [Source:MGI Symbol;Acc:MGI:1891839]	Phax	14.4001	15.2909	24.5237	36.6872	22.0681	26.6275
ENSMUSG00000035208	0.656982	3.1778	4.28951	0.0383483	0.184044	schlafen 8 [Source:MGI Symbol;Acc:MGI:2672859]	Slfn8	4.41294	7.20679	8.81526	14.3634	7.04168	11.3045
ENSMUSG00000039307	0.656851	3.48688	8.4144	0.00372261	0.0560616	hexosaminidase (glycosyl hydrolase family 20, catalytic domain) containing [Source:MGI Symbol;Acc:MGI:3605542]	Hexdc	9.60009	7.45746	8.6827	11.5946	14.3349	14.6164
ENSMUSG00000033174	0.656103	6.30054	4.21543	0.040058	0.187658	monoglyceride lipase [Source:MGI Symbol;Acc:MGI:1346042]	Mgll	74.1684	64.0464	40.4309	50.6468	111.284	131.194
ENSMUSG00000048920	0.65484	6.06988	11.2136	0.000812017	0.027255	fukutin related protein [Source:MGI Symbol;Acc:MGI:2447586]	Fkrp	46.5295	51.5755	56.2719	106.543	67.9648	73.1262
ENSMUSG00000044250	0.654388	1.116	2.1975	0.138234	0.364997	PC-esterase domain containing 1B [Source:MGI Symbol;Acc:MGI:2446270]	Pced1b	2.40002	1.62936	0.596521	4.44169	2.64063	0.706533
ENSMUSG00000027424	0.654212	4.16944	10.0886	0.00149186	0.0362303	mitochondrial genome maintenance exonuclease 1 [Source:MGI Symbol;Acc:MGI:1921778]	Mgme1	12.3098	13.7869	15.1119	26.0156	17.1641	22.4766
ENSMUSG00000070520	0.654149	3.93975	11.0461	0.000888762	0.0288232	NSE3 homolog, SMC5-SMC6 complex component [Source:MGI Symbol;Acc:MGI:1913897]	Nsmce3	11.9227	11.9695	11.3339	21.1701	15.7809	18.8556
ENSMUSG00000036430	0.65395	4.33613	10.0162	0.0015517	0.0370315	tubulin-specific chaperone C [Source:MGI Symbol;Acc:MGI:1919976]	Tbcc	14.8647	14.4762	16.8352	31.5533	23.0112	19.518
ENSMUSG00000096910	0.653786	3.97568	8.87978	0.00288346	0.0499494	zinc finger protein 955B [Source:MGI Symbol;Acc:MGI:4834573]	Zfp955b	11.8453	10.0268	13.8526	26.4194	14.7121	16.5594
ENSMUSG00000033983	0.653184	2.72597	5.50004	0.019016	0.128983	coilin [Source:MGI Symbol;Acc:MGI:104842]	Coil	4.41294	4.19874	6.49546	9.05644	6.91594	7.63939
ENSMUSG00000051113	0.653007	0.290769	1.16411	0.280614	0.537358	family with sequence similarity 71, member E1 [Source:MGI Symbol;Acc:MGI:1922788]	Fam71e1	0.541941	1.56669	0.530241	1.49979	1.69755	0.750691
ENSMUSG00000035399	0.652875	3.4318	7.99449	0.004692	0.0624108	oxidative stress responsive serine rich 1 [Source:MGI Symbol;Acc:MGI:1913930]	Oser1	6.89039	6.89345	11.2013	13.6712	11.0655	13.954
ENSMUSG00000050212	0.652739	3.83592	10.4692	0.0012138	0.032729	eva-1 homolog B (C. elegans) [Source:MGI Symbol;Acc:MGI:1922063]	Eva1b	11.6904	11.7189	9.21294	21.1701	18.7359	12.3202
ENSMUSG00000047878	0.651636	3.77182	8.59164	0.0033771	0.0539533	alpha 1,4-galactosyltransferase [Source:MGI Symbol;Acc:MGI:3512453]	A4galt	9.90977	10.2775	10.8699	21.8047	14.0834	14.0423
ENSMUSG00000043683	0.650873	8.80563	14.683	0.00012719	0.00981322	feminization 1 homolog a (C. elegans) [Source:MGI Symbol;Acc:MGI:1335089]	Fem1a	345.526	372.497	316.62	692.212	507.693	449.267
ENSMUSG00000034889	0.650418	4.62863	9.96963	0.00159144	0.0372374	cactin, spliceosome C complex subunit [Source:MGI Symbol;Acc:MGI:1917562]	Cactin	18.5808	18.3616	19.155	40.8982	20.9364	29.4094
ENSMUSG00000053119	0.650399	5.4242	14.4292	0.000145528	0.0107118	charged multivesicular body protein 3 [Source:MGI Symbol;Acc:MGI:1913950]	Chmp3	38.5552	29.5792	32.0796	49.147	53.5042	53.7848
ENSMUSG00000074102	0.650004	5.49365	15.8303	6.92847e-05	0.00684457	RNA binding motif protein 15B [Source:MGI Symbol;Acc:MGI:1923598]	Rbm15b	37.3165	33.8406	33.1401	66.2793	49.7319	49.0599
ENSMUSG00000038070	0.649883	3.77237	9.86301	0.00168635	0.0383868	centlein, centrosomal protein [Source:MGI Symbol;Acc:MGI:2443104]	Cntln	10.9162	8.33481	12.1955	20.1895	13.3289	16.0295
ENSMUSG00000039697	0.649454	3.21692	7.57948	0.00590365	0.0694965	nuclear receptor coactivator 7 [Source:MGI Symbol;Acc:MGI:2444847]	Ncoa7	8.05169	7.45746	5.83265	13.3828	9.74519	10.3772
ENSMUSG00000020961	0.649186	2.06366	3.55099	0.0595101	0.231908	stonin 2 [Source:MGI Symbol;Acc:MGI:1918272]	Ston2	4.95489	3.13339	1.45816	8.01812	3.08074	3.66514
ENSMUSG00000055148	0.648617	5.51452	15.825	6.94801e-05	0.00684457	Kruppel-like factor 2 (lung) [Source:MGI Symbol;Acc:MGI:1342772]	Klf2	45.6004	32.2739	28.3679	73.6052	45.0793	48.4417
ENSMUSG00000042851	0.648219	3.63696	8.09324	0.00444307	0.0606977	zinc finger CCCH type containing 6 [Source:MGI Symbol;Acc:MGI:1926001]	Zc3h6	10.0646	9.83883	8.08618	21.6893	14.1462	9.97978
ENSMUSG00000041598	0.648101	5.12702	14.6324	0.000130646	0.00995188	CDC42 effector protein (Rho GTPase binding) 4 [Source:MGI Symbol;Acc:MGI:1929760]	Cdc42ep4	28.568	25.9444	26.0481	53.8772	37.2203	37.0488
ENSMUSG00000032024	0.647976	3.18329	4.9482	0.0261179	0.150415	CXADR-like membrane protein [Source:MGI Symbol;Acc:MGI:1918816]	Clmp	4.87747	7.14412	8.74898	14.0173	8.73923	9.93562
ENSMUSG00000021624	0.647475	1.87095	3.02959	0.0817585	0.273824	CD180 antigen [Source:MGI Symbol;Acc:MGI:1194924]	Cd180	3.25164	3.19605	1.657	6.51833	2.76638	3.66514
ENSMUSG00000095325	0.647466	3.78832	8.3923	0.00376813	0.0562959	zinc finger protein 870 [Source:MGI Symbol;Acc:MGI:3029586]	Zfp870	10.3743	10.2148	10.8037	22.5546	14.9636	13.0709
ENSMUSG00000054206	0.647076	2.48665	4.77065	0.0289489	0.158352	granzyme M (lymphocyte met-ase 1) [Source:MGI Symbol;Acc:MGI:99549]	Gzmm	3.4839	3.82273	5.36869	7.96044	5.21839	6.75622
ENSMUSG00000038059	0.646899	3.71407	8.119	0.00438038	0.0602855	small integral membrane protein 3 [Source:MGI Symbol;Acc:MGI:1917088]	Smim3	7.35491	12.9722	10.0746	16.44	18.7359	12.2319
ENSMUSG00000030247	0.645896	5.3992	12.7305	0.000359744	0.0169545	potassium inwardly-rectifying channel, subfamily J, member 8 [Source:MGI Symbol;Acc:MGI:1100508]	Kcnj8	30.968	25.8818	40.8286	64.5488	36.5287	53.3432
ENSMUSG00000007216	0.645887	4.3706	10.9788	0.000921591	0.0293148	zinc finger protein 775 [Source:MGI Symbol;Acc:MGI:2683557]	Zfp775	16.4905	16.1056	14.7142	33.7453	21.3137	20.7986
ENSMUSG00000041343	0.645603	0.896015	1.86767	0.171743	0.411376	ankyrin repeat domain 42 [Source:MGI Symbol;Acc:MGI:1921095]	Ankrd42	1.70324	0.626677	1.78956	2.65348	1.38319	2.16376
ENSMUSG00000030614	0.645521	5.3107	10.5279	0.00117588	0.032729	transmembrane protein 126B [Source:MGI Symbol;Acc:MGI:1915722]	Tmem126b	25.4712	31.2712	35.1285	59.2995	38.1634	47.691
ENSMUSG00000052031	0.64497	4.28726	8.3908	0.00377124	0.0562959	T cell activation GTPase activating protein 1 [Source:MGI Symbol;Acc:MGI:1919786]	Tagap1	14.1679	12.5962	17.6968	33.5723	17.8557	20.2687
ENSMUSG00000031444	0.644042	-0.454463	0.700903	0.40248	0.643959	coagulation factor X [Source:MGI Symbol;Acc:MGI:103107]	F10	0.30968	0.438674	0.530241	0.230737	0.88021	1.10396
ENSMUSG00000029708	0.644035	4.66136	11.409	0.00073088	0.025468	golgi coiled coil 1 [Source:MGI Symbol;Acc:MGI:1921625]	Gcc1	19.9744	24.0017	15.0456	37.4948	28.4811	25.8768
ENSMUSG00000066613	0.64276	2.91554	4.89432	0.0269452	0.152499	zinc finger protein 932 [Source:MGI Symbol;Acc:MGI:1916754]	Zfp932	5.72909	5.6401	5.30241	13.4404	9.11646	5.25484
ENSMUSG00000029086	0.642264	0.017768	1.06019	0.303172	0.556246	prominin 1 [Source:MGI Symbol;Acc:MGI:1100886]	Prom1	0.696781	0.752013	0.596521	1.26906	1.32032	0.706533
ENSMUSG00000036437	0.641675	0.856308	1.80187	0.179486	0.421137	neuropeptide Y receptor Y1 [Source:MGI Symbol;Acc:MGI:104963]	Npy1r	1.5484	1.37869	0.994202	1.73053	2.82925	1.63386
ENSMUSG00000043336	0.641275	6.8102	11.4542	0.000713316	0.0252591	filamin A interacting protein 1-like [Source:MGI Symbol;Acc:MGI:1925999]	Filip1l	92.2073	80.7787	82.7839	199.126	100.721	116.71
ENSMUSG00000021384	0.640852	0.661316	1.26064	0.261529	0.516125	sushi domain containing 3 [Source:MGI Symbol;Acc:MGI:1913579]	Susd3	0.3871	1.00268	1.9884	1.49979	0.88021	2.6495
ENSMUSG00000048027	0.640721	4.63336	6.45712	0.0110509	0.0980287	repulsive guidance molecule family member B [Source:MGI Symbol;Acc:MGI:1916049]	Rgmb	17.3421	22.3724	15.1782	50.07	25.2117	17.84
ENSMUSG00000060206	0.640548	3.97564	9.51747	0.00203525	0.0421134	zinc finger protein 462 [Source:MGI Symbol;Acc:MGI:107690]	Zfp462	13.7034	13.0349	9.41178	26.131	15.4666	15.7204
ENSMUSG00000039081	0.639553	1.12071	1.95526	0.162021	0.397379	zinc finger protein 503 [Source:MGI Symbol;Acc:MGI:1353644]	Zfp503	3.0968	1.12802	0.861642	3.23032	2.89212	1.28059
ENSMUSG00000050846	0.639168	3.80757	7.85293	0.00507384	0.0645442	zinc finger protein 623 [Source:MGI Symbol;Acc:MGI:1926084]	Zfp623	10.3743	9.52549	11.9304	23.5929	12.763	14.8372
ENSMUSG00000028688	0.63899	3.08132	6.05651	0.0138551	0.10962	target of EGR1, member 1 (nuclear) [Source:MGI Symbol;Acc:MGI:1915526]	Toe1	5.41941	6.51744	7.42338	12.1714	8.42487	9.80314
ENSMUSG00000078868	0.638872	2.36144	4.17128	0.0411148	0.190348	predicted gene 14412 [Source:MGI Symbol;Acc:MGI:3652251]	Gm14412	4.2581	3.50939	3.51285	8.94107	3.52084	6.09385
ENSMUSG00000038594	0.638234	5.2635	9.62689	0.00191749	0.0407021	centrosomal protein 85-like [Source:MGI Symbol;Acc:MGI:3642684]	Cep85l	31.5874	31.9605	22.8004	74.8166	37.5976	30.8225
ENSMUSG00000044134	0.638179	4.07267	5.03798	0.0247975	0.146029	family with sequence similarity 109, member A [Source:MGI Symbol;Acc:MGI:2442708]	Fam109a	11.8453	10.7788	14.8468	32.2455	18.4844	11.9227
ENSMUSG00000049728	0.637842	3.29047	7.84067	0.00510837	0.0647917	zinc finger protein 668 [Source:MGI Symbol;Acc:MGI:2442943]	Zfp668	9.36783	8.46014	4.90473	13.9019	13.5175	7.81602
ENSMUSG00000020178	0.637793	2.78518	5.36286	0.02057	0.133894	adenosine A2a receptor [Source:MGI Symbol;Acc:MGI:99402]	Adora2a	5.26457	5.45209	4.83845	11.2484	6.79019	6.84454
ENSMUSG00000066640	0.637414	3.65151	7.72889	0.00543442	0.0672349	F-box and leucine-rich repeat protein 18 [Source:MGI Symbol;Acc:MGI:2444450]	Fbxl18	14.4776	7.33212	7.29082	20.7664	8.86498	15.7204
ENSMUSG00000026527	0.63657	0.195066	1.09265	0.295884	0.550244	regulator of G protein signaling 7 [Source:MGI Symbol;Acc:MGI:1346089]	Rgs7	0.464521	1.44136	0.530241	0.692212	1.82329	1.10396
ENSMUSG00000023971	0.636264	3.84244	9.17729	0.00245037	0.0459294	ribosomal RNA processing 36 homolog (S. cerevisiae) [Source:MGI Symbol;Acc:MGI:2385053]	Rrp36	9.98719	10.5282	12.6595	20.2472	14.8378	16.7802
ENSMUSG00000074826	0.635253	-1.11519	0.2525	0.61532	0.798764	predicted gene 10767 [Source:MGI Symbol;Acc:MGI:3642136]	Gm10767	0	0.188003	0.463961	0.346106	0	0.839008
ENSMUSG00000060594	0.634833	3.23208	6.70646	0.00960644	0.0904192	layilin [Source:MGI Symbol;Acc:MGI:2685357]	Layn	6.34845	7.33212	7.88734	13.2674	9.43082	11.0837
ENSMUSG00000027848	0.63375	5.46672	14.3332	0.000153142	0.0109047	olfactomedin-like 3 [Source:MGI Symbol;Acc:MGI:1914877]	Olfml3	34.2197	27.6991	41.5577	62.9913	41.9357	55.8603
ENSMUSG00000046312	0.633467	4.35949	11.0511	0.000886333	0.0288157	expressed sequence AI464131 [Source:MGI Symbol;Acc:MGI:2140300]	AI464131	15.8711	17.6096	13.8526	30.515	26.8464	17.6192
ENSMUSG00000089722	0.633264	1.24226	1.21939	0.269481	0.524938	CD300 molecule like family member D5 [Source:MGI Symbol;Acc:MGI:3702661]	Cd300ld5	3.40648	3.13339	0	4.0379	2.32627	0.79485
ENSMUSG00000046743	0.63292	6.65517	10.6998	0.00107149	0.0311364	FAT atypical cadherin 4 [Source:MGI Symbol;Acc:MGI:3045256]	Fat4	93.2912	75.3266	59.5196	198.492	85.5061	91.6726
ENSMUSG00000032492	0.632912	3.32622	6.73477	0.00945516	0.0897905	parathyroid hormone 1 receptor [Source:MGI Symbol;Acc:MGI:97801]	Pth1r	8.59363	8.46014	6.09777	14.7095	9.4937	11.8344
ENSMUSG00000068270	0.632184	6.00684	12.1598	0.000488307	0.0201916	shroom family member 4 [Source:MGI Symbol;Acc:MGI:2685570]	Shroom4	55.2005	50.7609	42.1542	110.869	61.992	63.8971
ENSMUSG00000027088	0.632106	4.4729	6.91039	0.00856963	0.0846101	phosphatase, orphan 2 [Source:MGI Symbol;Acc:MGI:1920623]	Phospho2	9.83235	25.2551	18.2933	22.7853	23.1998	32.5888
ENSMUSG00000033029	0.632027	-0.260973	0.809778	0.368186	0.614989	RIKEN cDNA 1700088E04 gene [Source:MGI Symbol;Acc:MGI:1920774]	1700088E04Rik	0.929041	0.56401	0.265121	0.865265	1.1317	0.574058
ENSMUSG00000042606	0.631752	2.02791	4.00749	0.0452985	0.200491	HIRA interacting protein 3 [Source:MGI Symbol;Acc:MGI:2142364]	Hirip3	2.94196	2.88272	3.31401	5.65306	3.70946	4.98989
ENSMUSG00000005982	0.631749	5.16054	10.1985	0.00140552	0.0349434	N(alpha)-acetyltransferase 60, NatF catalytic subunit [Source:MGI Symbol;Acc:MGI:1922013]	Naa60	25.0067	22.9364	36.6529	47.7626	42.5016	38.771
ENSMUSG00000099041	0.631274	4.3738	6.40826	0.0113591	0.0996921	predicted gene, 28035 [Source:MGI Symbol;Acc:MGI:5547771]	Gm28035	15.9485	30.2058	6.49546	27.054	27.6638	16.2061
ENSMUSG00000064262	0.631024	4.31779	7.759	0.00534454	0.0667489	GTPase, IMAP family member 8 [Source:MGI Symbol;Acc:MGI:2685303]	Gimap8	14.0905	13.6616	17.5642	34.5529	16.1581	22.5649
ENSMUSG00000103472	0.630535	4.61877	8.71948	0.00314827	0.0517719	protocadherin gamma subfamily A, 7 [Source:MGI Symbol;Acc:MGI:1935219]	Pcdhga7	21.1357	15.9803	18.0945	47.7049	23.6399	20.0037
ENSMUSG00000047735	0.630466	5.52876	10.8958	0.000963831	0.0297904	sterile alpha motif domain containing 9-like [Source:MGI Symbol;Acc:MGI:1343184]	Samd9l	34.7616	28.8898	43.0158	76.1433	38.9807	54.1381
ENSMUSG00000022901	0.630441	1.83851	1.91288	0.166643	0.403952	CD86 antigen [Source:MGI Symbol;Acc:MGI:101773]	Cd86	1.08388	2.1307	5.76637	3.34569	4.77828	3.48851
ENSMUSG00000034057	0.629979	0.450898	1.28147	0.257626	0.511504	myelin regulatory factor-like [Source:MGI Symbol;Acc:MGI:2685085]	Myrfl	0.851621	1.06535	0.927922	2.07664	1.38319	1.10396
ENSMUSG00000003039	0.629919	5.2621	10.1501	0.00144294	0.0354515	family with sequence similarity 32, member A [Source:MGI Symbol;Acc:MGI:1915172]	Fam32a	27.4841	27.0098	34.2006	62.5298	36.0886	41.9062
ENSMUSG00000050213	0.629729	3.71215	8.22097	0.00414091	0.0592127	Smad nuclear interacting protein 1 [Source:MGI Symbol;Acc:MGI:2156003]	Snip1	8.90331	10.4028	10.8699	16.6708	11.9457	18.679
ENSMUSG00000069892	0.629286	5.07496	9.9658	0.00159475	0.0372374	RIKEN cDNA 9930111J21 gene 2 [Source:MGI Symbol;Acc:MGI:3711310]	9930111J21Rik2	27.0196	22.1217	27.3074	61.6069	27.2236	35.9449
ENSMUSG00000043157	0.628778	1.18564	1.78954	0.180982	0.42283	ADP-ribosylation factor-like 11 [Source:MGI Symbol;Acc:MGI:2444054]	Arl11	0.619361	1.44136	3.18145	2.192	1.69755	3.44435
ENSMUSG00000044991	0.628689	4.82159	10.8616	0.000981804	0.0297904	RIKEN cDNA 1110034G24 gene [Source:MGI Symbol;Acc:MGI:1920997]	1110034G24Rik	27.7164	24.5031	14.9793	39.8022	30.3044	31.4407
ENSMUSG00000057396	0.628567	3.68823	7.83023	0.00513794	0.0650409	zinc finger protein 759 [Source:MGI Symbol;Acc:MGI:2446280]	Zfp759	10.8388	10.4655	7.88734	22.7276	15.0893	9.53819
ENSMUSG00000039634	0.628516	3.62654	7.51122	0.0061316	0.0709684	zinc finger protein 189 [Source:MGI Symbol;Acc:MGI:2444707]	Zfp189	8.51621	11.4055	8.74898	17.4784	12.8888	14.0423
ENSMUSG00000063047	0.628515	4.46791	8.54504	0.00346466	0.0542856	zinc finger protein 780B [Source:MGI Symbol;Acc:MGI:2444764]	Zfp780b	13.9356	17.0456	20.6794	32.4763	23.6399	23.978
ENSMUSG00000032184	0.6284	3.17103	7.16848	0.00741955	0.0783622	LysM, putative peptidoglycan-binding, domain containing 2 [Source:MGI Symbol;Acc:MGI:1917332]	Lysmd2	8.51621	6.51744	5.96521	11.4215	10.6254	10.1123
ENSMUSG00000051228	0.627392	0.342458	0.63008	0.427326	0.664707	nyctalopin [Source:MGI Symbol;Acc:MGI:2448607]	Nyx	0.929041	1.06535	0.397681	1.90358	0.314361	1.98712
ENSMUSG00000048924	0.627278	0.275787	0.847331	0.357308	0.604371	coiled-coil domain containing 125 [Source:MGI Symbol;Acc:MGI:1923291]	Ccdc125	0.23226	1.25335	1.19304	1.26906	1.69755	0.839008
ENSMUSG00000026180	0.626851	0.975803	1.53303	0.215658	0.464652	chemokine (C-X-C motif) receptor 2 [Source:MGI Symbol;Acc:MGI:105303]	Cxcr2	1.00646	1.12802	2.25353	1.90358	2.95499	1.76633
ENSMUSG00000021763	0.626425	2.60176	3.38853	0.0656514	0.24422	cDNA sequence BC067074 [Source:MGI Symbol;Acc:MGI:3040697]	BC067074	3.17422	7.9588	3.11517	9.51791	7.60753	4.19504
ENSMUSG00000061898	0.624124	3.52571	6.03653	0.0140128	0.110136	RB-associated KRAB zinc finger [Source:MGI Symbol;Acc:MGI:1927369]	Rbak	9.13557	9.77616	6.89314	22.2662	11.0655	9.09661
ENSMUSG00000046561	0.624013	1.28659	2.14298	0.143224	0.371293	arylsulfatase J [Source:MGI Symbol;Acc:MGI:2443513]	Arsj	1.47098	2.82005	1.25932	3.17264	2.7035	2.34039
ENSMUSG00000025354	0.62359	5.86517	13.1685	0.000284699	0.0150408	DnaJ heat shock protein family (Hsp40) member C14 [Source:MGI Symbol;Acc:MGI:1921580]	Dnajc14	44.6714	44.0554	47.4566	86.8149	59.4771	66.2375
ENSMUSG00000051341	0.623512	4.60631	9.4364	0.00212721	0.0427465	zinc finger protein 52 [Source:MGI Symbol;Acc:MGI:99199]	Zfp52	18.2711	18.9257	18.8898	40.3213	25.5261	23.2714
ENSMUSG00000079316	0.62305	4.23586	7.6174	0.00578079	0.0692768	RAB9, member RAS oncogene family [Source:MGI Symbol;Acc:MGI:1890695]	Rab9	12.155	14.2256	17.034	28.5537	15.4666	24.4637
ENSMUSG00000044876	0.62256	2.88741	5.73371	0.0166423	0.120391	zinc finger protein 444 [Source:MGI Symbol;Acc:MGI:1923365]	Zfp444	5.41941	7.83347	4.04309	9.9217	9.74519	6.57959
ENSMUSG00000047485	0.622501	2.91514	4.43695	0.0351689	0.176343	kelch-like 34 [Source:MGI Symbol;Acc:MGI:2685234]	Klhl34	3.71616	4.76275	9.08038	9.9217	5.59562	10.9954
ENSMUSG00000057667	0.622241	2.73595	4.76568	0.0290325	0.158515	biogenesis of lysosomal organelles complex-1, subunit 3 [Source:MGI Symbol;Acc:MGI:2678952]	Bloc1s3	4.49036	6.2041	4.63961	8.94107	6.53871	8.12513
ENSMUSG00000027547	0.621843	1.24567	2.35256	0.125078	0.346903	sal-like 4 (Drosophila) [Source:MGI Symbol;Acc:MGI:2139360]	Sall4	2.01292	1.81736	1.45816	2.42274	3.08074	2.60534
ENSMUSG00000045752	0.621818	3.74476	8.00225	0.00467192	0.0622069	tumor-suppressing subchromosomal transferable fragment 4 [Source:MGI Symbol;Acc:MGI:1861712]	Tssc4	9.67751	11.3429	10.0083	20.1318	13.7061	14.5722
ENSMUSG00000037731	0.620726	2.77189	5.79216	0.0160978	0.117763	thymocyte selection associated family member 2 [Source:MGI Symbol;Acc:MGI:2446213]	Themis2	5.26457	4.13607	6.36289	8.07581	6.60158	9.49404
ENSMUSG00000046791	0.619981	2.86763	3.61269	0.0573404	0.228023	ribosomal oxygenase 1 [Source:MGI Symbol;Acc:MGI:1919202]	Riox1	3.40648	7.89613	5.83265	10.3832	7.41892	7.81602
ENSMUSG00000044827	0.61981	2.08692	4.00685	0.0453157	0.200491	toll-like receptor 1 [Source:MGI Symbol;Acc:MGI:1341295]	Tlr1	2.55486	2.31871	4.83845	3.6918	4.27531	6.71206
ENSMUSG00000050248	0.619775	3.90461	8.77955	0.00304627	0.0511067	EvC ciliary complex subunit 2 [Source:MGI Symbol;Acc:MGI:1915775]	Evc2	11.1485	11.7815	11.7979	21.5739	18.673	13.9982
ENSMUSG00000019779	0.619439	2.32428	3.3938	0.0654419	0.243539	fyn-related kinase [Source:MGI Symbol;Acc:MGI:103265]	Frk	4.95489	2.25604	4.57333	5.24927	6.41296	5.78474
ENSMUSG00000002835	0.618991	2.93552	4.79129	0.0286041	0.157202	chromatin assembly factor 1, subunit A (p150) [Source:MGI Symbol;Acc:MGI:1351331]	Chaf1a	4.64521	5.76543	7.09198	11.3061	6.47583	9.53819
ENSMUSG00000103332	0.618904	4.29033	9.47555	0.00208229	0.0422361	protocadherin gamma subfamily A, 2 [Source:MGI Symbol;Acc:MGI:1935214]	Pcdhga2	16.026	18.863	11.0025	30.7457	21.9424	17.9283
ENSMUSG00000030047	0.618848	2.74745	4.40988	0.0357314	0.178208	Rho GTPase activating protein 25 [Source:MGI Symbol;Acc:MGI:2443687]	Arhgap25	4.18068	5.32676	5.83265	10.3255	6.53871	7.10949
ENSMUSG00000033585	0.618184	3.28804	6.47248	0.0109557	0.0977806	necdin [Source:MGI Symbol;Acc:MGI:97290]	Ndn	5.49683	8.52281	8.88154	11.2484	12.3229	11.1279
ENSMUSG00000004500	0.617703	3.65645	6.24088	0.0124834	0.104243	zinc finger protein 324 [Source:MGI Symbol;Acc:MGI:2444641]	Zfp324	7.66459	10.5282	11.1351	18.5744	14.5235	12.276
ENSMUSG00000038241	0.616555	5.02529	12.2896	0.000455488	0.0195666	centrosomal protein 250 [Source:MGI Symbol;Acc:MGI:108084]	Cep250	30.968	23.7511	20.7457	56.9344	29.3613	32.7213
ENSMUSG00000047180	0.616525	2.77216	4.35453	0.0369106	0.180314	neuralized E3 ubiquitin protein ligase 3 [Source:MGI Symbol;Acc:MGI:2429944]	Neurl3	4.02584	4.38674	7.22454	10.0371	5.15552	9.05245
ENSMUSG00000045871	0.616337	0.736756	1.48144	0.223549	0.474399	SLIT and NTRK-like family, member 6 [Source:MGI Symbol;Acc:MGI:2443198]	Slitrk6	1.39356	1.00268	1.19304	2.42274	2.07478	1.19227
ENSMUSG00000067424	0.615866	3.00927	3.81052	0.0509315	0.213811	zinc finger protein 563 [Source:MGI Symbol;Acc:MGI:2677168]	Zfp563	5.57425	5.38942	6.89314	15.6901	7.6704	6.22632
ENSMUSG00000078485	0.61574	-0.0916556	0.552905	0.457133	0.688274	pleckstrin homology domain containing, family N member 1 [Source:MGI Symbol;Acc:MGI:2387630]	Plekhn1	1.78066	0	0.729082	1.26906	0.502977	0.750691
ENSMUSG00000103476	0.615667	4.14672	8.80136	0.00301005	0.0510191	predicted gene, 34302 [Source:MGI Symbol;Acc:MGI:5593461]	Gm34302	28.4132	6.14144	4.37449	52.3774	9.24221	5.299
ENSMUSG00000032911	0.615064	6.69267	13.3694	0.000255757	0.0142641	chondroitin sulfate proteoglycan 4 [Source:MGI Symbol;Acc:MGI:2153093]	Cspg4	87.8718	88.4868	67.4069	156.209	113.799	105.936
ENSMUSG00000041801	0.613543	4.1786	10.3687	0.00128167	0.0333184	pleckstrin homology like domain, family A, member 3 [Source:MGI Symbol;Acc:MGI:1351485]	Phlda3	13.6259	13.1602	15.7084	24.2851	19.9933	20.8869
ENSMUSG00000042992	0.61353	3.54883	7.89675	0.00495237	0.0637244	BLOC-1 related complex subunit 5 [Source:MGI Symbol;Acc:MGI:1915024]	Borcs5	8.28395	9.40016	9.61062	14.9979	15.0893	11.9227
ENSMUSG00000021366	0.61352	6.2759	11.0009	0.0009107	0.0293102	human immunodeficiency virus type I enhancer binding protein 1 [Source:MGI Symbol;Acc:MGI:96100]	Hivep1	72.8523	67.4305	40.7623	139.308	76.6412	67.0765
ENSMUSG00000027188	0.613078	1.87503	3.19359	0.0739277	0.259436	peptidase domain containing associated with muscle regeneration 1 [Source:MGI Symbol;Acc:MGI:2445082]	Pamr1	4.18068	2.82005	1.657	4.61475	4.46392	3.53266
ENSMUSG00000050505	0.613058	0.0854794	0.740011	0.389657	0.632156	protocadherin 20 [Source:MGI Symbol;Acc:MGI:2443376]	Pcdh20	0.30968	0.81468	1.12676	1.38442	1.25744	0.706533
ENSMUSG00000069833	0.613001	12.4034	22.3405	2.28342e-06	0.000650378	AHNAK nucleoprotein (desmoyokin) [Source:MGI Symbol;Acc:MGI:1316648]	Ahnak	4605.26	4098.53	3829.2	9563.08	5189.72	5218.54
ENSMUSG00000064105	0.612187	3.79804	7.18088	0.00736845	0.0782346	cyclin M2 [Source:MGI Symbol;Acc:MGI:2151054]	Cnnm2	13.7808	12.9096	6.36289	22.6123	13.8319	13.115
ENSMUSG00000050035	0.611875	-0.12534	0.693137	0.405099	0.64566	four and a half LIM domains 4 [Source:MGI Symbol;Acc:MGI:1338765]	Fhl4	1.00646	0.376006	0.530241	0.576843	1.19457	1.0598
ENSMUSG00000043085	0.610969	4.4995	9.78688	0.00175761	0.0391604	transmembrane protein 82 [Source:MGI Symbol;Acc:MGI:2384869]	Tmem82	24.6196	13.5989	14.2502	39.3984	15.5923	27.2898
ENSMUSG00000046679	0.610264	4.08422	7.56817	0.00594081	0.069649	expressed sequence C87436 [Source:MGI Symbol;Acc:MGI:2141787]	C87436	10.0646	14.5389	15.377	23.3622	18.673	18.7231
ENSMUSG00000058093	0.609593	3.99021	7.65148	0.00567258	0.0685121	zinc finger protein 729b [Source:MGI Symbol;Acc:MGI:2145180]	Zfp729b	11.4582	10.0268	15.9072	23.5929	16.221	17.1776
ENSMUSG00000049680	0.609478	6.98686	8.95796	0.00276262	0.0485851	upregulator of cell proliferation [Source:MGI Symbol;Acc:MGI:1919296]	Urgcp	91.9751	102.086	101.674	208.067	120.589	135.61
ENSMUSG00000037740	0.609269	5.22145	9.40921	0.00215899	0.0430548	mitochondrial ribosomal protein S26 [Source:MGI Symbol;Acc:MGI:1333830]	Mrps26	24.0776	27.8871	36.3878	53.4734	39.1694	41.8179
ENSMUSG00000049038	0.609019	4.37811	11.7443	0.000610302	0.0229775	mitochondrial transcription termination factor 2 [Source:MGI Symbol;Acc:MGI:1921488]	Mterf2	18.7357	14.4762	15.841	28.4961	23.7028	22.6091
ENSMUSG00000002668	0.608495	0.730295	1.12372	0.289118	0.54364	DENN/MADD domain containing 1C [Source:MGI Symbol;Acc:MGI:1918035]	Dennd1c	0.929041	1.19069	1.12676	0.519159	3.14361	2.16376
ENSMUSG00000053297	0.607601	-0.180683	0.838715	0.359764	0.606801	expressed sequence AI854703 [Source:MGI Symbol;Acc:MGI:2141510]	AI854703	0.619361	0.689345	0.463961	1.21137	1.00595	0.574058
ENSMUSG00000037904	0.607041	5.99231	13.7318	0.000210857	0.0132603	ankyrin repeat domain 9 [Source:MGI Symbol;Acc:MGI:1921501]	Ankrd9	56.2844	51.9515	41.6902	98.2364	72.2401	60.6735
ENSMUSG00000040236	0.606845	4.92762	12.7486	0.000356272	0.0169545	trafficking protein particle complex 5 [Source:MGI Symbol;Acc:MGI:1913932]	Trappc5	21.9873	24.1271	25.7167	38.2447	32.0019	39.4334
ENSMUSG00000054364	0.606822	7.42855	10.8581	0.000983648	0.0297904	ras homolog family member B [Source:MGI Symbol;Acc:MGI:107949]	Rhob	132.311	134.736	137.73	265.867	171.201	190.764
ENSMUSG00000022357	0.606711	5.98351	11.2965	0.000776543	0.0264267	kelch-like 38 [Source:MGI Symbol;Acc:MGI:3045310]	Klhl38	58.4522	52.3275	35.1948	117.907	66.7702	48.1767
ENSMUSG00000028630	0.606611	4.78678	9.96289	0.00159727	0.0372374	dual-specificity tyrosine-(Y)-phosphorylation regulated kinase 2 [Source:MGI Symbol;Acc:MGI:1330301]	Dyrk2	23.4583	22.247	18.1608	48.1664	27.4751	25.2144
ENSMUSG00000050428	0.606573	3.63231	8.18198	0.00423085	0.059491	F-box protein 46 [Source:MGI Symbol;Acc:MGI:2444918]	Fbxo46	13.5485	9.77616	6.29661	18.5167	13.8319	11.6578
ENSMUSG00000036599	0.606513	2.53175	4.37686	0.03643	0.179305	carbohydrate sulfotransferase 12 [Source:MGI Symbol;Acc:MGI:1929064]	Chst12	5.65167	4.51208	3.31401	7.78738	5.53275	6.97701
ENSMUSG00000074340	0.606453	0.57401	1.01885	0.312792	0.565894	oviductal glycoprotein 1 [Source:MGI Symbol;Acc:MGI:106661]	Ovgp1	0.774201	1.50403	0.861642	2.24969	0.943082	1.67802
ENSMUSG00000033450	0.606097	2.837	5.12814	0.023541	0.142558	T cell activation Rho GTPase activating protein [Source:MGI Symbol;Acc:MGI:3615484]	Tagap	5.96135	3.19605	7.62222	10.6139	5.53275	8.96414
ENSMUSG00000054737	0.605485	3.815	5.44178	0.0196607	0.130776	zinc finger protein 182 [Source:MGI Symbol;Acc:MGI:2442220]	Zfp182	11.1485	9.14949	11.0025	28.8998	12.1972	11.1721
ENSMUSG00000039457	0.605468	4.19993	7.69936	0.00552404	0.0675752	periplakin [Source:MGI Symbol;Acc:MGI:1194898]	Ppl	15.0969	16.3563	10.7374	33.63	19.1131	14.4839
ENSMUSG00000030641	0.605201	0.817588	1.52618	0.216686	0.465704	DNA damage-induced apoptosis suppressor [Source:MGI Symbol;Acc:MGI:1921291]	Ddias	1.39356	0.752013	1.657	2.88422	1.1317	1.89881
ENSMUSG00000074825	0.605182	4.14056	9.29916	0.00229259	0.0444076	inositol 1,4,5-triphosphate receptor interacting protein-like 1 [Source:MGI Symbol;Acc:MGI:1920588]	Itpripl1	12.7743	15.7923	12.9909	23.4775	19.0503	20.7102
ENSMUSG00000022414	0.60481	5.05766	12.1945	0.00047931	0.0201051	TGF-beta activated kinase 1/MAP3K7 binding protein 1 [Source:MGI Symbol;Acc:MGI:1913763]	Tab1	25.2389	28.8898	24.5237	46.6089	37.9119	35.6799
ENSMUSG00000031385	0.604561	1.44872	1.63913	0.200445	0.446333	plexin B3 [Source:MGI Symbol;Acc:MGI:2154240]	Plxnb3	0.774201	3.32139	2.31981	3.05727	2.2634	3.57682
ENSMUSG00000024330	0.604312	1.63793	2.63216	0.104719	0.313822	collagen, type XI, alpha 2 [Source:MGI Symbol;Acc:MGI:88447]	Col11a2	2.24518	3.32139	1.45816	5.13391	3.77233	1.98712
ENSMUSG00000109179	0.604041	1.18416	0.873122	0.350092	0.598111	predicted gene, 35339 [Source:MGI Symbol;Acc:MGI:5594498]	Gm35339	2.94196	2.50671	0.265121	3.17264	1.38319	2.56118
ENSMUSG00000069793	0.603853	3.23476	6.08418	0.0136398	0.108726	schlafen 9 [Source:MGI Symbol;Acc:MGI:2445121]	Slfn9	5.96135	6.64278	9.27922	12.056	8.11051	13.2917
ENSMUSG00000020561	0.60373	3.51316	7.80634	0.00520632	0.0655896	twist basic helix-loop-helix transcription factor 1 neighbor [Source:MGI Symbol;Acc:MGI:106292]	Twistnb	8.20653	6.64278	12.063	14.3057	10.2482	15.9411
ENSMUSG00000028678	0.603252	0.47681	0.536298	0.463971	0.693209	kinesin family member 2C [Source:MGI Symbol;Acc:MGI:1921054]	Kif2c	0	0.877348	2.38609	0.980634	0.377233	2.60534
ENSMUSG00000047307	0.603048	0.311922	1.08695	0.297148	0.551133	protocadherin beta 13 [Source:MGI Symbol;Acc:MGI:2136748]	Pcdhb13	1.39356	0.438674	0.795362	2.36506	0.754466	0.971483
ENSMUSG00000026605	0.603037	4.73338	9.86133	0.00168789	0.0383868	centromere protein F [Source:MGI Symbol;Acc:MGI:1313302]	Cenpf	12.3872	12.5335	40.5635	24.4582	18.7359	49.5015
ENSMUSG00000036840	0.603029	4.30778	9.68122	0.00186161	0.0402489	seven in absentia 1A [Source:MGI Symbol;Acc:MGI:108064]	Siah1a	13.084	13.2229	20.4806	25.4965	17.7928	27.5989
ENSMUSG00000049321	0.602934	2.92364	5.46435	0.0194083	0.130126	zinc finger protein 2 [Source:MGI Symbol;Acc:MGI:99167]	Zfp2	5.41941	5.51476	6.76058	9.74865	8.99072	8.16929
ENSMUSG00000044456	0.602818	4.67697	8.80328	0.0030069	0.0510191	Ras and Rab interactor 3 [Source:MGI Symbol;Acc:MGI:2385708]	Rin3	26.7873	26.6338	9.08038	42.1096	29.2984	18.8556
ENSMUSG00000034839	0.602669	1.13067	1.61589	0.203665	0.450976	La ribonucleoprotein domain family, member 6 [Source:MGI Symbol;Acc:MGI:1914807]	Larp6	1.23872	2.06803	1.45816	3.63411	1.82329	2.03128
ENSMUSG00000035829	0.602526	3.26835	5.79744	0.0160495	0.117665	protein phosphatase 1, regulatory subunit 26 [Source:MGI Symbol;Acc:MGI:2685193]	Ppp1r26	7.97427	8.58548	5.70009	16.3823	9.87093	8.43424
ENSMUSG00000033126	0.602216	2.98542	5.45355	0.0195286	0.130327	ybeY metallopeptidase [Source:MGI Symbol;Acc:MGI:2656825]	Ybey	5.10973	5.70276	7.75478	9.97939	8.8021	9.18493
ENSMUSG00000075012	0.602	0.905622	1.68788	0.193881	0.437965	four jointed box 1 (Drosophila) [Source:MGI Symbol;Acc:MGI:1341907]	Fjx1	1.00646	1.12802	1.9884	1.96127	1.63468	2.56118
ENSMUSG00000037725	0.60195	1.5084	1.91423	0.166494	0.403666	cytoskeleton associated protein 2 [Source:MGI Symbol;Acc:MGI:1931797]	Ckap2	1.08388	1.56669	3.91053	3.80717	1.76042	3.88593
ENSMUSG00000035236	0.601885	3.70774	4.42656	0.0353838	0.176878	suppressor of cancer cell invasion [Source:MGI Symbol;Acc:MGI:2443716]	Scai	6.11619	19.427	7.48966	13.9019	15.4037	14.9697
ENSMUSG00000063506	0.601479	2.28842	3.68591	0.054874	0.222842	Rho GTPase activating protein 22 [Source:MGI Symbol;Acc:MGI:2443418]	Arhgap22	3.94842	2.63204	4.63961	7.90275	4.46392	4.85741
ENSMUSG00000025893	0.601455	3.61529	6.67128	0.00979787	0.091252	kelch repeat and BTB (POZ) domain containing 3 [Source:MGI Symbol;Acc:MGI:1916399]	Kbtbd3	8.28395	8.89882	11.599	17.363	13.5804	12.8501
ENSMUSG00000031826	0.600695	5.64316	12.3984	0.00042971	0.0190825	ubiquitin specific peptidase 10 [Source:MGI Symbol;Acc:MGI:894652]	Usp10	43.4327	46.1234	27.9702	80.9311	61.1117	39.4775
ENSMUSG00000045210	0.60058	5.78855	13.4544	0.000244432	0.0139709	valosin containing protein (p97)/p47 complex interacting protein 1 [Source:MGI Symbol;Acc:MGI:1917925]	Vcpip1	49.0069	39.606	41.6239	86.065	55.7676	58.6422
ENSMUSG00000036160	0.600347	3.88453	6.26749	0.0122973	0.103814	surfeit gene 6 [Source:MGI Symbol;Acc:MGI:98447]	Surf6	10.3743	10.2148	13.9851	22.6699	16.7869	13.6891
ENSMUSG00000052915	0.600093	6.26822	11.4761	0.000704983	0.0250997	male-specific lethal 1 homolog (Drosophila) [Source:MGI Symbol;Acc:MGI:1921276]	Msl1	64.1813	55.9623	60.3149	124.54	70.1653	86.2853
ENSMUSG00000021943	0.599883	1.60115	2.76857	0.0961318	0.301537	growth differentiation factor 10 [Source:MGI Symbol;Acc:MGI:95684]	Gdf10	3.25164	1.62936	2.12096	4.38401	3.3951	2.69366
ENSMUSG00000021047	0.599836	1.64022	2.33475	0.126515	0.348675	neuro-oncological ventral antigen 1 [Source:MGI Symbol;Acc:MGI:104297]	Nova1	3.01938	3.19605	0.994202	5.76843	2.76638	2.20792
ENSMUSG00000025880	0.599697	5.29223	12.0394	0.000520889	0.0208963	SMAD family member 7 [Source:MGI Symbol;Acc:MGI:1100518]	Smad7	39.1746	33.6526	19.8178	68.0675	41.0555	32.5447
ENSMUSG00000042419	0.599495	2.98038	5.29034	0.0214441	0.136854	nuclear factor of kappa light polypeptide gene enhancer in B cells inhibitor like 1 [Source:MGI Symbol;Acc:MGI:1340031]	Nfkbil1	6.11619	5.70276	6.49546	11.1331	9.87093	7.1978
ENSMUSG00000038527	0.599219	1.7341	2.81621	0.0933165	0.296755	complement component 1, r subcomponent-like [Source:MGI Symbol;Acc:MGI:2660692]	C1rl	1.78066	2.50671	3.24773	4.0379	2.89212	4.45999
ENSMUSG00000052684	0.598414	6.64941	11.1946	0.000820356	0.0273326	jun proto-oncogene [Source:MGI Symbol;Acc:MGI:96646]	Jun	88.646	80.0894	65.7499	173.803	99.1494	93.9689
ENSMUSG00000030717	0.598129	2.34106	3.91197	0.0479435	0.206494	nuclear protein transcription regulator 1 [Source:MGI Symbol;Acc:MGI:1891834]	Nupr1	3.40648	4.38674	3.84425	7.38359	5.53275	4.94573
ENSMUSG00000041147	0.597973	3.4314	6.22108	0.0126238	0.104682	breast cancer 2, early onset [Source:MGI Symbol;Acc:MGI:109337]	Brca2	10.5291	4.95075	9.27922	20.9971	7.54466	10.5538
ENSMUSG00000028188	0.597424	1.43567	2.28624	0.130526	0.354064	spermatogenesis associated 1 [Source:MGI Symbol;Acc:MGI:1918201]	Spata1	2.3226	2.44404	1.39188	2.9419	2.76638	3.44435
ENSMUSG00000026274	0.597403	1.20929	2.12088	0.145303	0.374094	PAS domain containing serine/threonine kinase [Source:MGI Symbol;Acc:MGI:2155936]	Pask	2.09034	1.88003	1.25932	2.53811	3.33222	2.03128
ENSMUSG00000052675	0.597071	3.33745	7.08389	0.00777802	0.080179	zinc finger protein 112 [Source:MGI Symbol;Acc:MGI:1929115]	Zfp112	9.29041	7.64546	6.6943	15.6901	10.6254	9.8473
ENSMUSG00000003752	0.596854	3.87102	7.36907	0.00663553	0.0739904	inositol 1,4,5-trisphosphate 3-kinase C [Source:MGI Symbol;Acc:MGI:2442554]	Itpkc	9.52267	13.0349	11.9304	20.1895	15.3408	16.736
ENSMUSG00000032766	0.5967	4.52377	10.7915	0.00101964	0.0303326	guanine nucleotide binding protein (G protein), gamma 11 [Source:MGI Symbol;Acc:MGI:1913316]	Gng11	17.7292	14.3509	22.6678	30.2266	22.634	29.3653
ENSMUSG00000062619	0.596592	3.44	6.42485	0.0112535	0.0992805	RIKEN cDNA 2310039H08 gene [Source:MGI Symbol;Acc:MGI:1914351]	2310039H08Rik	6.73555	8.02147	10.9362	13.6712	11.8828	12.8501
ENSMUSG00000032469	0.595747	2.93331	4.70428	0.0300876	0.161627	debranching RNA lariats 1 [Source:MGI Symbol;Acc:MGI:1931520]	Dbr1	4.49036	6.95612	6.36289	9.17181	7.16743	10.5538
ENSMUSG00000033862	0.595639	3.99566	8.54334	0.00346788	0.0542856	cyclin-dependent kinase 10 [Source:MGI Symbol;Acc:MGI:2448549]	Cdk10	11.2259	12.5962	13.72	22.0931	16.0953	18.9439
ENSMUSG00000090231	0.595555	1.93181	2.25828	0.132902	0.357876	complement factor B [Source:MGI Symbol;Acc:MGI:105975]	Cfb	1.1613	1.88003	6.6943	2.53811	4.40105	5.21068
ENSMUSG00000034520	0.59524	4.83218	7.98205	0.00472434	0.0626501	gap junction protein, gamma 1 [Source:MGI Symbol;Acc:MGI:95718]	Gjc1	19.2776	21.0564	26.5121	45.1091	26.0291	31.8823
ENSMUSG00000048040	0.594891	-0.607062	0.58003	0.446301	0.679855	adipocyte-related X-chromosome expressed sequence 2 [Source:MGI Symbol;Acc:MGI:1924226]	Arxes2	0.3871	0.188003	0.729082	0.692212	0.440105	0.706533
ENSMUSG00000067928	0.59483	2.69654	4.53156	0.0332752	0.170701	zinc finger protein 760 [Source:MGI Symbol;Acc:MGI:2679257]	Zfp760	5.49683	4.0734	5.16985	11.1331	4.9669	7.10949
ENSMUSG00000026566	0.594362	2.97041	3.03872	0.0812999	0.27334	myelin protein zero-like 1 [Source:MGI Symbol;Acc:MGI:1915731]	Mpzl1	3.79358	9.83883	5.03729	12.4021	8.61349	6.40295
ENSMUSG00000045930	0.594129	5.37401	9.6121	0.001933	0.0407454	C-type lectin domain family 14, member a [Source:MGI Symbol;Acc:MGI:1914114]	Clec14a	32.3616	31.0205	33.2726	67.7791	35.0198	48.3092
ENSMUSG00000002617	0.59405	3.31956	5.17813	0.0228729	0.140726	zinc finger protein 40 [Source:MGI Symbol;Acc:MGI:99185]	Zfp40	7.58717	6.76811	8.41758	17.8821	8.362	9.93562
ENSMUSG00000040640	0.593828	0.586623	1.00886	0.315177	0.568103	ELKS/RAB6-interacting/CAST family member 2 [Source:MGI Symbol;Acc:MGI:1098749]	Erc2	0.541941	1.62936	1.06048	1.38442	1.06883	2.29623
ENSMUSG00000032313	0.593786	0.224433	0.967963	0.325189	0.576617	transmembrane protein 266 [Source:MGI Symbol;Acc:MGI:2142980]	Tmem266	1.08388	0.626677	0.795362	1.096	1.50893	1.14812
ENSMUSG00000073555	0.59375	0.91107	1.55083	0.213012	0.461316	predicted gene 4951 [Source:MGI Symbol;Acc:MGI:3644953]	Gm4951	0.696781	1.12802	2.38609	1.61516	1.50893	2.91445
ENSMUSG00000078234	0.593325	2.05961	3.71379	0.0539648	0.220883	kelch domain containing 7A [Source:MGI Symbol;Acc:MGI:2444612]	Klhdc7a	4.18068	3.00805	2.38609	6.9798	3.96095	3.7093
ENSMUSG00000030929	0.593211	2.28281	3.75723	0.0525797	0.217288	exoribonuclease 2 [Source:MGI Symbol;Acc:MGI:1918401]	Eri2	5.72909	3.38406	2.51865	6.51833	5.34413	4.94573
ENSMUSG00000067722	0.593076	5.31761	10.055	0.00151931	0.0365919	cDNA sequence BC003965 [Source:MGI Symbol;Acc:MGI:2670966]	BC003965	28.3358	29.5165	36.8518	57.742	42.8788	42.966
ENSMUSG00000022120	0.592927	2.55211	4.3701	0.0365749	0.17972	ring finger protein 219 [Source:MGI Symbol;Acc:MGI:1919736]	Rnf219	3.63874	4.19874	5.76637	7.26823	5.34413	7.90434
ENSMUSG00000034037	0.592854	6.17887	9.35315	0.00222603	0.0438492	FYVE, RhoGEF and PH domain containing 5 [Source:MGI Symbol;Acc:MGI:2443369]	Fgd5	63.8716	59.5343	44.6065	134.116	66.5187	65.1335
ENSMUSG00000045094	0.592732	2.49191	3.64836	0.0561246	0.22522	Rho guanine nucleotide exchange factor (GEF) 37 [Source:MGI Symbol;Acc:MGI:3045339]	Arhgef37	4.49036	2.69471	6.16405	7.96044	5.65849	5.91721
ENSMUSG00000034485	0.592652	6.61088	11.2386	0.00080114	0.0270529	uveal autoantigen with coiled-coil domains and ankyrin repeats [Source:MGI Symbol;Acc:MGI:1919815]	Uaca	84.5427	73.1959	71.8477	159.728	88.9641	107.172
ENSMUSG00000028664	0.592466	0.799239	1.33404	0.248087	0.501844	Eph receptor B2 [Source:MGI Symbol;Acc:MGI:99611]	Ephb2	1.08388	0.877348	1.92212	2.42274	1.63468	1.67802
ENSMUSG00000045374	0.59231	5.20153	12.6174	0.000382165	0.0175647	WD repeat domain 81 [Source:MGI Symbol;Acc:MGI:2681828]	Wdr81	35.9229	29.2658	22.2701	58.2035	37.5976	36.6514
ENSMUSG00000047342	0.591998	0.0531364	0.600057	0.438556	0.673776	zinc finger protein 286 [Source:MGI Symbol;Acc:MGI:2384758]	Zfp286	0.464521	0.250671	1.59072	1.78821	0.502977	0.839008
ENSMUSG00000047123	0.591021	3.93336	8.7021	0.00317844	0.0518882	toll-like receptor adaptor molecule 1 [Source:MGI Symbol;Acc:MGI:2147032]	Ticam1	14.2453	12.5335	8.94782	26.0733	16.1581	12.8942
ENSMUSG00000026162	0.590879	1.96777	2.65373	0.103307	0.311874	nonhomologous end-joining factor 1 [Source:MGI Symbol;Acc:MGI:1922820]	Nhej1	3.0968	3.38406	2.31981	5.99917	2.76638	4.90157
ENSMUSG00000070423	0.590846	2.56582	3.9681	0.04637	0.202581	olfactory receptor 558 [Source:MGI Symbol;Acc:MGI:3030392]	Olfr558	4.10326	4.51208	4.97101	9.34486	5.65849	6.00553
ENSMUSG00000061024	0.590743	4.42378	9.20306	0.00241611	0.0454825	ribosome biogenesis regulator 1 [Source:MGI Symbol;Acc:MGI:1929721]	Rrs1	13.7808	19.1763	18.1608	27.4577	23.8914	25.2586
ENSMUSG00000022787	0.590331	2.79335	2.86743	0.090389	0.291192	WD repeat domain 53 [Source:MGI Symbol;Acc:MGI:1916230]	Wdr53	3.94842	4.88808	7.22454	11.4215	7.73328	5.51979
ENSMUSG00000044709	0.590282	4.66804	9.53854	0.00201202	0.0418436	gem nuclear organelle associated protein 7 [Source:MGI Symbol;Acc:MGI:1916981]	Gemin7	18.8131	18.7376	22.6678	36.6296	27.7895	26.9366
ENSMUSG00000025209	0.589809	5.20864	10.1476	0.0014449	0.0354515	twinkle mtDNA helicase [Source:MGI Symbol;Acc:MGI:2137410]	Twnk	28.6454	33.3392	25.1202	58.7803	41.4328	33.6486
ENSMUSG00000079043	0.589496	3.7799	5.94472	0.0147614	0.113301	FAST kinase domains 5 [Source:MGI Symbol;Acc:MGI:2139469]	Fastkd5	10.684	7.9588	13.8526	21.6316	14.0205	13.38
ENSMUSG00000025172	0.589328	2.67645	4.37685	0.0364303	0.179305	ankyrin repeat domain 2 (stretch responsive muscle) [Source:MGI Symbol;Acc:MGI:1861447]	Ankrd2	4.02584	7.7708	2.58493	5.59538	14.5235	3.22356
ENSMUSG00000074649	0.589199	4.74362	9.91684	0.00163774	0.0376444	cDNA sequence BC029722 [Source:MGI Symbol;Acc:MGI:3584273]	BC029722	21.2905	23.5631	18.0282	41.0136	33.8881	22.1233
ENSMUSG00000020021	0.588928	4.36151	9.82344	0.00172302	0.0387887	FYVE, RhoGEF and PH domain containing 6 [Source:MGI Symbol;Acc:MGI:1261419]	Fgd6	18.8131	19.991	10.3397	31.7841	24.5201	17.0893
ENSMUSG00000046417	0.588734	2.36404	3.89232	0.0485073	0.207658	leucine rich repeat containing 75A [Source:MGI Symbol;Acc:MGI:2682293]	Lrrc75a	3.32906	4.32407	4.24193	6.74907	4.9669	6.27048
ENSMUSG00000037204	0.588516	4.32518	8.31827	0.00392482	0.0576294	autophagy related 101 [Source:MGI Symbol;Acc:MGI:1915368]	Atg101	16.1808	14.9776	15.9072	28.8422	26.2806	17.2659
ENSMUSG00000070056	0.588421	6.72351	12.7604	0.000354039	0.0169545	malignant fibrous histiocytoma amplified sequence 1 [Source:MGI Symbol;Acc:MGI:1098644]	Mfhas1	82.7621	84.7894	84.5735	144.442	115.936	120.552
ENSMUSG00000078920	0.588293	1.56817	2.38731	0.122324	0.34271	interferon gamma inducible protein 47 [Source:MGI Symbol;Acc:MGI:99448]	Ifi47	1.47098	2.00537	3.11517	3.28801	2.01191	4.7691
ENSMUSG00000064307	0.587946	1.17226	1.87529	0.170871	0.409952	leucine rich repeat containing 51 [Source:MGI Symbol;Acc:MGI:1916608]	Lrrc51	1.47098	1.31602	2.25353	3.17264	1.94904	2.47287
ENSMUSG00000021974	0.587461	2.67087	3.4303	0.0640106	0.241164	fibroblast growth factor 9 [Source:MGI Symbol;Acc:MGI:104723]	Fgf9	3.0968	7.7708	4.30821	8.4796	8.55061	5.12236
ENSMUSG00000001632	0.586873	5.17911	11.9377	0.000550099	0.0216438	bromodomain and PHD finger containing, 1 [Source:MGI Symbol;Acc:MGI:1926033]	Brpf1	29.9616	32.3365	23.8609	53.4734	41.5585	35.2825
ENSMUSG00000036469	0.58658	2.23955	3.5853	0.058293	0.229908	membrane-associated ring finger (C3HC4) 1 [Source:MGI Symbol;Acc:MGI:1920175]	March1	3.56132	2.69471	4.77217	4.44169	5.78424	6.138
ENSMUSG00000038872	0.586408	5.72304	8.23684	0.00410484	0.0589711	zinc finger homeobox 3 [Source:MGI Symbol;Acc:MGI:99948]	Zfhx3	62.0135	51.7635	15.1119	105.389	51.2408	30.7783
ENSMUSG00000036898	0.586366	3.83267	5.66676	0.0172893	0.122512	zinc finger protein 157 [Source:MGI Symbol;Acc:MGI:1919404]	Zfp157	8.12911	10.4655	15.377	20.2472	13.3289	16.8685
ENSMUSG00000022010	0.586095	8.25503	11.7501	0.000608408	0.0229722	TSC22 domain family, member 1 [Source:MGI Symbol;Acc:MGI:109127]	Tsc22d1	299.151	233.813	191.947	442.208	421.621	243.533
ENSMUSG00000032680	0.585813	0.845789	1.28983	0.25608	0.510047	RIKEN cDNA 6820408C15 gene [Source:MGI Symbol;Acc:MGI:3045333]	6820408C15Rik	1.1613	1.62936	0.994202	2.99959	2.51489	0.79485
ENSMUSG00000021604	0.585696	5.44262	11.9958	0.000533207	0.0211699	Iroquois related homeobox 4 (Drosophila) [Source:MGI Symbol;Acc:MGI:1355275]	Irx4	35.7681	38.1646	29.8261	61.8376	47.5314	46.852
ENSMUSG00000074811	0.585686	3.49933	6.91053	0.00856898	0.0846101	HPS6, biogenesis of lysosomal organelles complex 2 subunit 3 [Source:MGI Symbol;Acc:MGI:2181763]	Hps6	9.98719	8.77348	7.55594	18.4013	13.2032	9.14077
ENSMUSG00000110277	0.585562	2.44245	4.34068	0.0372121	0.181177	predicted gene 45871 [Source:MGI Symbol;Acc:MGI:5804986]	Gm45871	4.87747	4.13607	3.64541	7.44128	5.28126	6.31464
ENSMUSG00000031004	0.585025	5.6943	8.92174	0.00281796	0.0491623	antigen identified by monoclonal antibody Ki 67 [Source:MGI Symbol;Acc:MGI:106035]	Mki67	42.8907	21.683	54.7474	94.0255	25.7776	70.3883
ENSMUSG00000053390	0.58465	3.44627	5.47948	0.019241	0.129484	zinc finger protein 952 [Source:MGI Symbol;Acc:MGI:2441928]	Zfp952	8.90331	5.51476	11.8641	14.9979	11.2541	11.9669
ENSMUSG00000036560	0.584549	2.77746	4.56607	0.0326113	0.168949	leucine-rich repeat LGI family, member 4 [Source:MGI Symbol;Acc:MGI:2180197]	Lgi4	5.03231	6.95612	4.24193	8.53728	7.73328	7.68355
ENSMUSG00000033849	0.584485	4.29863	10.345	0.00129829	0.0334911	UDP-Gal:betaGlcNAc beta 1,3-galactosyltransferase, polypeptide 2 [Source:MGI Symbol;Acc:MGI:1349461]	B3galt2	14.9421	15.6043	16.2386	24.4582	21.5652	24.2429
ENSMUSG00000068115	0.583881	1.95187	2.55341	0.110056	0.322571	ninein-like [Source:MGI Symbol;Acc:MGI:1925427]	Ninl	2.94196	3.44672	2.25353	7.09517	2.95499	3.62098
ENSMUSG00000034271	0.583161	3.67637	7.4833	0.00622737	0.071823	Jun dimerization protein 2 [Source:MGI Symbol;Acc:MGI:1932093]	Jdp2	9.52267	9.9015	10.6711	17.1899	12.0715	16.2944
ENSMUSG00000090523	0.583111	5.23962	8.52519	0.00350265	0.0542856	glycophorin C [Source:MGI Symbol;Acc:MGI:1098566]	Gypc	25.3938	32.9632	31.2842	56.4153	43.6962	35.989
ENSMUSG00000037379	0.582929	0.707839	1.19612	0.274099	0.530307	spondin 2, extracellular matrix protein [Source:MGI Symbol;Acc:MGI:1923724]	Spon2	0.3871	1.50403	1.85584	1.21137	1.82329	2.07544
ENSMUSG00000036611	0.582883	5.206	12.6781	0.000369962	0.0173116	endonuclease/exonuclease/phosphatase family domain containing 1 [Source:MGI Symbol;Acc:MGI:1914734]	Eepd1	35.9229	30.0178	21.8062	59.761	40.7412	32.4122
ENSMUSG00000021327	0.582375	6.06651	6.82292	0.00899953	0.0871484	zinc finger with KRAB and SCAN domains 3 [Source:MGI Symbol;Acc:MGI:1919989]	Zkscan3	84.1556	39.23	43.2809	75.4511	79.7848	79.4408
ENSMUSG00000031662	0.581955	1.86459	2.8817	0.0895912	0.289637	sorting nexin 20 [Source:MGI Symbol;Acc:MGI:1918857]	Snx20	1.78066	2.94538	3.64541	3.80717	3.33222	5.25484
ENSMUSG00000052137	0.581538	5.03538	8.28967	0.00398712	0.0580479	RNA binding motif protein 12 B2 [Source:MGI Symbol;Acc:MGI:1924854]	Rbm12b2	28.2583	22.1217	24.8551	62.7606	25.7147	32.1031
ENSMUSG00000078922	0.581502	2.80167	5.11967	0.0236561	0.142765	T cell specific GTPase 1 [Source:MGI Symbol;Acc:MGI:98734]	Tgtp1	4.18068	5.70276	6.42918	6.46065	7.98476	9.97978
ENSMUSG00000034912	0.581479	0.631381	0.868394	0.3514	0.599355	MAM domain containing glycosylphosphatidylinositol anchor 2 [Source:MGI Symbol;Acc:MGI:2444706]	Mdga2	1.00646	0.56401	1.45816	3.74948	0.754466	0.971483
ENSMUSG00000022114	0.581346	4.44653	7.17605	0.00738831	0.0783272	sprouty homolog 2 (Drosophila) [Source:MGI Symbol;Acc:MGI:1345138]	Spry2	15.4066	17.4843	18.4259	32.6493	27.2236	18.7673
ENSMUSG00000056014	0.581191	3.25461	5.40989	0.020023	0.132527	RIKEN cDNA A430033K04 gene [Source:MGI Symbol;Acc:MGI:3583896]	A430033K04Rik	9.13557	8.33481	5.03729	15.9209	8.92785	9.05245
ENSMUSG00000027959	0.581095	1.98166	3.35584	0.066967	0.247016	SAS-6 centriolar assembly protein [Source:MGI Symbol;Acc:MGI:1920026]	Sass6	3.17422	3.25872	2.65121	5.76843	4.14956	3.84177
ENSMUSG00000094870	0.58044	5.12639	9.2536	0.00235033	0.0449548	zinc finger protein 131 [Source:MGI Symbol;Acc:MGI:1919715]	Zfp131	25.7035	24.3151	32.8087	54.0502	32.6935	38.9918
ENSMUSG00000029097	0.580255	2.29025	3.16646	0.0751653	0.261849	tRNA methyltransferase 44 [Source:MGI Symbol;Acc:MGI:1926140]	Trmt44	2.78712	3.6974	4.97101	6.46065	5.72137	4.81326
ENSMUSG00000041396	0.579853	1.70608	2.72309	0.0989063	0.305031	methyltransferase like 18 [Source:MGI Symbol;Acc:MGI:1917212]	Mettl18	1.85808	3.38406	2.31981	3.74948	3.96095	3.40019
ENSMUSG00000103037	0.57978	3.85409	4.69226	0.0302989	0.162296	protocadherin gamma subfamily B, 1 [Source:MGI Symbol;Acc:MGI:1935169]	Pcdhgb1	11.3808	10.4655	10.2071	30.8611	10.6883	12.2319
ENSMUSG00000102428	0.579224	3.96122	7.60674	0.00581504	0.0693886	protocadherin gamma subfamily A, 12 [Source:MGI Symbol;Acc:MGI:1935229]	Pcdhga12	13.0066	13.4109	10.1409	25.7272	15.6552	14.6164
ENSMUSG00000032062	0.578958	2.2874	3.67515	0.0552292	0.223544	RIKEN cDNA 2310030G06 gene [Source:MGI Symbol;Acc:MGI:1914202]	2310030G06Rik	3.4839	3.82273	3.97681	7.03749	5.02977	5.03405
ENSMUSG00000004814	0.578946	0.123796	0.847063	0.357385	0.604421	chemokine (C-C motif) ligand 24 [Source:MGI Symbol;Acc:MGI:1928953]	Ccl24	0.696781	1.31602	0.397681	1.32674	1.19457	0.839008
ENSMUSG00000048521	0.578774	3.00412	5.13565	0.0234393	0.142371	chemokine (C-X-C motif) receptor 6 [Source:MGI Symbol;Acc:MGI:1934582]	Cxcr6	5.96135	6.32944	6.42918	10.4985	7.16743	10.6863
ENSMUSG00000037347	0.578405	2.8133	3.81888	0.050678	0.213088	carbohydrate (N-acetylglucosamino) sulfotransferase 7 [Source:MGI Symbol;Acc:MGI:1891767]	Chst7	5.03231	6.83078	4.44077	11.7676	6.79019	6.40295
ENSMUSG00000039942	0.578208	3.76279	7.36722	0.00664235	0.0740034	prostaglandin E receptor 4 (subtype EP4) [Source:MGI Symbol;Acc:MGI:104311]	Ptger4	11.9227	10.0268	9.74318	22.9584	13.2032	12.7176
ENSMUSG00000048965	0.578034	1.90108	2.39343	0.121846	0.342066	MAS-related GPR, member E [Source:MGI Symbol;Acc:MGI:2441884]	Mrgpre	2.40002	4.44941	1.72328	6.51833	4.33818	2.20792
ENSMUSG00000040195	0.577871	2.82818	3.14578	0.0761235	0.264344	nuclear envelope integral membrane protein 1 [Source:MGI Symbol;Acc:MGI:2446113]	Nemp1	8.28395	3.25872	5.76637	6.86444	8.8021	8.83166
ENSMUSG00000049804	0.577599	5.40394	12.3739	0.000435366	0.0190825	armadillo repeat containing, X-linked 4 [Source:MGI Symbol;Acc:MGI:2147887]	Armcx4	43.0456	40.6087	17.6968	71.5863	53.63	26.8041
ENSMUSG00000055991	0.577548	4.81646	10.6045	0.00112814	0.0319934	zinc finger with KRAB and SCAN domains 5 [Source:MGI Symbol;Acc:MGI:107533]	Zkscan5	20.9034	21.7457	24.5237	38.014	28.2925	34.5318
ENSMUSG00000001056	0.577446	4.08179	6.22208	0.0126166	0.104682	NHP2 ribonucleoprotein [Source:MGI Symbol;Acc:MGI:1098547]	Nhp2	12.0775	9.02415	20.4806	21.1125	18.2958	19.6504
ENSMUSG00000061755	0.577371	7.11378	9.6228	0.00192176	0.0407021	biorientation of chromosomes in cell division 1-like [Source:MGI Symbol;Acc:MGI:2444804]	Bod1l	112.337	99.015	115.924	222.719	121.155	158.837
ENSMUSG00000041238	0.577042	3.35116	5.45825	0.0194761	0.130325	retinoblastoma binding protein 8, endonuclease [Source:MGI Symbol;Acc:MGI:2442995]	Rbbp8	6.11619	7.58279	10.5385	13.3251	9.55657	13.0267
ENSMUSG00000025077	0.577012	4.10584	6.33857	0.011814	0.101669	DNA cross-link repair 1A [Source:MGI Symbol;Acc:MGI:1930042]	Dclre1a	11.3033	14.7269	14.5816	26.7655	18.2329	16.736
ENSMUSG00000051212	0.577005	1.79455	2.69444	0.100699	0.30747	G protein-coupled receptor 183 [Source:MGI Symbol;Acc:MGI:2442034]	Gpr183	2.01292	3.25872	2.71749	4.38401	3.45797	4.01841
ENSMUSG00000034243	0.576699	7.69293	7.89538	0.00495613	0.0637244	golgi autoantigen, golgin subfamily b, macrogolgin 1 [Source:MGI Symbol;Acc:MGI:1099447]	Golgb1	160.647	152.596	171.666	361.162	187.673	206.793
ENSMUSG00000022401	0.575824	4.13005	5.24575	0.0220005	0.138084	X-prolyl aminopeptidase 3, mitochondrial [Source:MGI Symbol;Acc:MGI:2445217]	Xpnpep3	6.65813	20.8057	16.3712	17.8821	20.8736	21.3285
ENSMUSG00000035007	0.575307	4.26274	8.72073	0.00314613	0.0517719	RUN domain containing 1 [Source:MGI Symbol;Acc:MGI:2144506]	Rundc1	16.6453	16.2936	12.3944	31.0919	20.3077	17.575
ENSMUSG00000049904	0.574676	1.29341	1.7192	0.189795	0.432677	transmembrane protein 17 [Source:MGI Symbol;Acc:MGI:2144205]	Tmem17	1.39356	2.38137	1.72328	3.23032	1.94904	3.04692
ENSMUSG00000032640	0.574443	5.22083	11.7602	0.000605121	0.0229722	chondroitin sulfate synthase 1 [Source:MGI Symbol;Acc:MGI:2681120]	Chsy1	28.3358	29.7045	31.2842	49.4355	41.1184	42.8777
ENSMUSG00000048728	0.57439	0.0658657	0.786965	0.37502	0.620012	zinc finger protein 454 [Source:MGI Symbol;Acc:MGI:2679253]	Zfp454	0.851621	1.12802	0.331401	0.980634	1.19457	1.01564
ENSMUSG00000046182	0.573777	3.70697	6.66536	0.00983047	0.0913467	GSG1-like [Source:MGI Symbol;Acc:MGI:2685483]	Gsg1l	11.613	13.4109	6.56174	18.8628	14.775	12.276
ENSMUSG00000040502	0.57347	2.60143	3.67545	0.0552194	0.223544	membrane-associated ring finger (C3HC4) 9 [Source:MGI Symbol;Acc:MGI:2446144]	March9	4.56779	3.76006	5.83265	9.51791	6.03573	5.8289
ENSMUSG00000104346	0.573307	4.16944	4.68398	0.0304451	0.162813	protocadherin gamma subfamily A, 3 [Source:MGI Symbol;Acc:MGI:1935215]	Pcdhga3	13.8582	13.5362	12.7258	38.014	13.0145	15.8528
ENSMUSG00000098188	0.573154	3.15194	4.18316	0.0408275	0.18942	sosondowah ankyrin repeat domain family member C [Source:MGI Symbol;Acc:MGI:3606051]	Sowahc	5.41941	7.33212	8.08618	13.7289	8.55061	9.22909
ENSMUSG00000052713	0.57305	4.81023	9.08107	0.00258269	0.0468676	zinc finger protein 608 [Source:MGI Symbol;Acc:MGI:2442338]	Zfp608	25.9357	24.3151	15.7747	50.3007	28.041	23.139
ENSMUSG00000043099	0.571624	4.76372	9.15282	0.00248335	0.0463029	hypermethylated in cancer 1 [Source:MGI Symbol;Acc:MGI:1338010]	Hic1	23.8454	21.119	18.8898	46.4936	25.4632	26.2742
ENSMUSG00000092335	0.571564	0.247935	0.762527	0.382539	0.626268	zinc finger protein 977 [Source:MGI Symbol;Acc:MGI:3645327]	Zfp977	0.696781	0.877348	0.795362	2.192	1.32032	0.5299
ENSMUSG00000068335	0.570965	2.66194	4.20854	0.0402209	0.187937	docking protein 1 [Source:MGI Symbol;Acc:MGI:893587]	Dok1	3.40648	4.0734	7.62222	6.46065	5.97286	9.3174
ENSMUSG00000046138	0.570688	5.62458	10.0887	0.0014918	0.0362303	RIKEN cDNA 9930021J03 gene [Source:MGI Symbol;Acc:MGI:2444398]	9930021J03Rik	42.1165	40.7967	34.2668	79.0852	47.217	51.5769
ENSMUSG00000046714	0.570481	1.47201	2.25612	0.133087	0.358051	forkhead box C2 [Source:MGI Symbol;Acc:MGI:1347481]	Foxc2	2.94196	2.1307	1.39188	3.63411	2.57776	3.13524
ENSMUSG00000079677	0.569994	4.65994	9.92998	0.00162608	0.0376412	ferredoxin 1-like [Source:MGI Symbol;Acc:MGI:1915415]	Fdx1l	18.8131	20.2417	21.4748	32.9954	30.6816	26.5391
ENSMUSG00000026470	0.569792	3.94006	8.17643	0.00424382	0.0595016	syntaxin 6 [Source:MGI Symbol;Acc:MGI:1926235]	Stx6	11.613	14.5389	10.6711	18.2282	17.6671	18.3699
ENSMUSG00000034796	0.569679	0.716667	1.05456	0.30446	0.557517	copine VII [Source:MGI Symbol;Acc:MGI:2142747]	Cpne7	1.31614	2.25604	0.397681	2.192	1.76042	1.19227
ENSMUSG00000029559	0.56945	4.14897	7.25731	0.00706129	0.076587	RIKEN cDNA 2210016L21 gene [Source:MGI Symbol;Acc:MGI:1919607]	2210016L21Rik	13.4711	14.4762	13.8526	28.15	19.3018	16.2944
ENSMUSG00000021217	0.569382	2.90529	5.18694	0.0227573	0.140466	teashirt zinc finger family member 3 [Source:MGI Symbol;Acc:MGI:2442819]	Tshz3	8.51621	4.44941	4.77217	12.8636	6.41296	7.15365
ENSMUSG00000024301	0.569078	0.736731	1.07849	0.299036	0.552824	kinesin family member C5B [Source:MGI Symbol;Acc:MGI:2137414]	Kifc5b	1.9355	0.626677	1.25932	2.36506	2.07478	1.10396
ENSMUSG00000019767	0.568758	0.131745	0.887199	0.346238	0.595665	coiled-coil domain containing 170 [Source:MGI Symbol;Acc:MGI:2685067]	Ccdc170	0.696781	0.81468	0.795362	1.38442	1.06883	1.01564
ENSMUSG00000054293	0.568561	0.781157	1.25698	0.262223	0.516622	RIKEN cDNA A630033H20 gene [Source:MGI Symbol;Acc:MGI:2441814]	A630033H20Rik	0.619361	1.50403	1.59072	1.21137	1.44606	2.87029
ENSMUSG00000010051	0.568559	2.90366	5.05223	0.0245943	0.145216	hyaluronoglucosaminidase 1 [Source:MGI Symbol;Acc:MGI:96298]	Hyal1	6.65813	7.14412	3.77797	10.7293	11.0026	4.90157
ENSMUSG00000030486	0.568471	2.07183	3.45036	0.063238	0.239533	zinc finger protein 108 [Source:MGI Symbol;Acc:MGI:1891198]	Zfp108	4.02584	2.31871	3.38029	6.17222	3.14361	5.25484
ENSMUSG00000036863	0.567677	6.38363	9.10607	0.00254763	0.0466215	synapse defective 1, Rho GTPase, homolog 2 (C. elegans) [Source:MGI Symbol;Acc:MGI:3036264]	Syde2	69.6781	73.2586	53.8858	143.749	91.1018	68.4454
ENSMUSG00000027883	0.567493	1.61123	2.34756	0.125479	0.347282	G-protein signalling modulator 2 (AGS3-like, C. elegans) [Source:MGI Symbol;Acc:MGI:1923373]	Gpsm2	2.01292	2.44404	2.45237	4.32632	2.51489	3.62098
ENSMUSG00000035184	0.566817	3.56388	4.72648	0.0297017	0.160541	family with sequence similarity 124, member A [Source:MGI Symbol;Acc:MGI:3645930]	Fam124a	8.59363	10.5282	8.3513	20.651	10.2482	11.6136
ENSMUSG00000036862	0.56662	5.85048	10.1132	0.00147213	0.0360522	dachsous 1 (Drosophila) [Source:MGI Symbol;Acc:MGI:2685011]	Dchs1	54.6586	54.5836	28.8319	100.255	62.4321	44.644
ENSMUSG00000045968	0.566484	0.600965	1.10495	0.293182	0.54719	transmembrane epididymal family member 2 [Source:MGI Symbol;Acc:MGI:1923273]	Teddm2	1.00646	1.12802	1.06048	1.67285	1.00595	2.25207
ENSMUSG00000057103	0.566429	0.946181	1.29113	0.25584	0.510047	N-acetyltransferase 8 (GCN5-related) family member 1 [Source:MGI Symbol;Acc:MGI:1913366]	Nat8f1	2.09034	1.81736	0.596521	2.99959	1.5718	1.72217
ENSMUSG00000051515	0.564876	2.79071	4.51376	0.0336233	0.172016	family with sequence similarity 181, member B [Source:MGI Symbol;Acc:MGI:1930951]	Fam181b	5.41941	6.58011	4.37449	9.80634	7.98476	6.49127
ENSMUSG00000024534	0.564669	3.20465	4.44358	0.0350327	0.175811	synuclein, alpha interacting protein (synphilin) [Source:MGI Symbol;Acc:MGI:1915097]	Sncaip	10.7614	9.27482	2.71749	16.5554	9.30508	6.04969
ENSMUSG00000003545	0.564542	-0.191702	0.729426	0.393069	0.635566	FBJ osteosarcoma oncogene B [Source:MGI Symbol;Acc:MGI:95575]	Fosb	0.3871	0.752013	0.662802	0.692212	1.06883	0.883166
ENSMUSG00000025013	0.564399	1.07005	1.67616	0.195436	0.440116	tolloid-like 2 [Source:MGI Symbol;Acc:MGI:1346044]	Tll2	2.55486	1.12802	1.06048	4.0379	1.88616	1.28059
ENSMUSG00000040795	0.56417	4.26978	8.94082	0.00278868	0.0488879	IQ motif containing C [Source:MGI Symbol;Acc:MGI:2446212]	Iqcc	16.3356	12.6589	17.2328	27.5154	19.5532	21.5051
ENSMUSG00000054280	0.563967	5.63129	9.66089	0.00188232	0.0404962	proline rich 14-like [Source:MGI Symbol;Acc:MGI:2443658]	Prr14l	44.9036	39.1047	33.0075	86.5842	45.6452	47.2494
ENSMUSG00000078932	0.563943	0.0269818	0.676788	0.410695	0.650144	cDNA sequence CN725425 [Source:MGI Symbol;Acc:MGI:3613655]	CN725425	0.3871	0.188003	1.45816	0.807581	0.188616	2.03128
ENSMUSG00000042275	0.563801	4.2751	8.18809	0.00421663	0.059491	pelota homolog (Drosophila) [Source:MGI Symbol;Acc:MGI:2145154]	Pelo	16.2582	14.2256	15.377	30.7457	19.9933	18.679
ENSMUSG00000006464	0.563117	2.96129	4.56674	0.0325986	0.168949	Bardet-Biedl syndrome 1 (human) [Source:MGI Symbol;Acc:MGI:1277215]	Bbs1	7.04523	6.83078	4.37449	13.4404	7.54466	6.6679
ENSMUSG00000028282	0.562921	4.87903	8.81531	0.00298714	0.0508279	caspase 8 associated protein 2 [Source:MGI Symbol;Acc:MGI:1349399]	Casp8ap2	23.8454	19.5523	26.1807	48.3972	24.7716	32.8096
ENSMUSG00000026564	0.562836	6.501	10.6722	0.00108758	0.0315254	dual specificity phosphatase 27 (putative) [Source:MGI Symbol;Acc:MGI:2685055]	Dusp27	66.1942	76.956	75.4268	120.964	95.6286	107.216
ENSMUSG00000002006	0.562527	1.63656	2.20793	0.137303	0.363835	PDZ domain containing 4 [Source:MGI Symbol;Acc:MGI:2443483]	Pdzd4	1.85808	2.94538	2.31981	4.55706	3.08074	3.00276
ENSMUSG00000029516	0.562443	2.69648	3.71883	0.0538019	0.220492	citron [Source:MGI Symbol;Acc:MGI:105313]	Cit	5.80651	4.32407	4.57333	12.2291	4.46392	6.57959
ENSMUSG00000041498	0.562319	1.05097	1.39226	0.238024	0.49064	kinesin family member 14 [Source:MGI Symbol;Acc:MGI:1098226]	Kif14	1.62582	1.06535	1.657	4.21096	1.06883	1.94297
ENSMUSG00000025646	0.562131	2.10167	3.01336	0.082581	0.275378	ATR interacting protein [Source:MGI Symbol;Acc:MGI:1925349]	Atrip	1.47098	5.95343	2.65121	2.99959	8.99072	2.91445
ENSMUSG00000043284	0.561895	4.59262	6.96615	0.00830661	0.0830154	transmembrane protein 11 [Source:MGI Symbol;Acc:MGI:2144726]	Tmem11	15.3292	17.9856	25.1202	32.9954	26.1548	26.1859
ENSMUSG00000028035	0.561481	7.33379	7.06369	0.00786616	0.0805993	DnaJ heat shock protein family (Hsp40) member B4 [Source:MGI Symbol;Acc:MGI:1914285]	Dnajb4	141.214	147.833	101.475	197.165	153.157	225.958
ENSMUSG00000046841	0.561259	6.4021	7.64434	0.00569507	0.0686433	cytoskeleton-associated protein 4 [Source:MGI Symbol;Acc:MGI:2444926]	Ckap4	64.3361	66.8038	68.6	144.326	79.5962	82.7968
ENSMUSG00000031728	0.561117	3.1235	4.45828	0.0347325	0.175025	zinc finger protein 821 [Source:MGI Symbol;Acc:MGI:1923121]	Zfp821	5.88393	7.39479	7.22454	13.2674	8.55061	9.00829
ENSMUSG00000044676	0.560944	3.84695	5.97119	0.0145415	0.112293	zinc finger protein 612 [Source:MGI Symbol;Acc:MGI:2443465]	Zfp612	11.8453	11.4682	10.0746	26.0156	14.5235	11.5695
ENSMUSG00000057409	0.560891	2.66144	3.23095	0.0722585	0.25622	zinc finger protein 53 [Source:MGI Symbol;Acc:MGI:99200]	Zfp53	4.18068	4.95075	5.50125	10.5562	6.03573	5.8289
ENSMUSG00000046807	0.560799	0.028766	0.691169	0.405767	0.646445	leucine rich repeat containing 75B [Source:MGI Symbol;Acc:MGI:2143657]	Lrrc75b	0.929041	0.501342	0.662802	1.61516	1.32032	0.441583
ENSMUSG00000068299	0.560046	0.566485	1.08128	0.298412	0.551997	N-acetyltransferase 8 (GCN5-related) family member 4 [Source:MGI Symbol;Acc:MGI:1922791]	Nat8f4	1.62582	0.689345	0.861642	2.99959	1.19457	0.839008
ENSMUSG00000030410	0.559951	5.79154	10.011	0.00155611	0.0370317	dystrophia myotonica-containing WD repeat motif [Source:MGI Symbol;Acc:MGI:94907]	Dmwd	44.5165	45.1834	42.6181	85.8343	58.4082	54.8446
ENSMUSG00000063439	0.559616	2.74091	4.49333	0.0340274	0.173235	B9 protein domain 2 [Source:MGI Symbol;Acc:MGI:2387643]	B9d2	5.80651	6.83078	3.31401	9.5756	8.8021	5.03405
ENSMUSG00000028028	0.559578	3.85664	5.53507	0.018639	0.127858	alpha-kinase 1 [Source:MGI Symbol;Acc:MGI:1918731]	Alpk1	12.6195	10.9042	10.0083	26.0156	10.4368	15.9411
ENSMUSG00000098134	0.55949	3.13426	5.50007	0.0190157	0.128983	ring finger protein 113A2 [Source:MGI Symbol;Acc:MGI:1913631]	Rnf113a2	6.65813	6.45478	7.75478	11.5946	9.24221	10.0239
ENSMUSG00000027474	0.559263	4.31406	9.12752	0.00251793	0.0465892	cerebral cavernous malformation 2-like [Source:MGI Symbol;Acc:MGI:2385159]	Ccm2l	20.5163	15.7296	10.9362	34.5529	22.5082	14.3956
ENSMUSG00000033960	0.559041	7.25433	9.10596	0.00254778	0.0466215	junctional cadherin 5 associated [Source:MGI Symbol;Acc:MGI:2685174]	Jcad	135.021	134.046	96.8353	249.542	152.968	146.738
ENSMUSG00000035342	0.558885	6.68975	10.1895	0.00141239	0.0349813	leucine zipper, putative tumor suppressor 2 [Source:MGI Symbol;Acc:MGI:2385095]	Lzts2	86.6331	83.5361	77.0175	159.786	100.344	111.102
ENSMUSG00000032942	0.558811	4.12496	8.52533	0.00350238	0.0542856	uncoupling protein 3 (mitochondrial, proton carrier) [Source:MGI Symbol;Acc:MGI:1099787]	Ucp3	17.4969	14.7269	9.21294	30.3996	19.176	12.9384
ENSMUSG00000025371	0.558748	4.66191	9.20454	0.00241415	0.0454825	charged multivesicular body protein 6 [Source:MGI Symbol;Acc:MGI:3583942]	Chmp6	17.1098	17.2963	27.2411	29.8228	27.035	32.3239
ENSMUSG00000068748	0.558533	0.0394897	0.630863	0.427039	0.664475	protein tyrosine phosphatase, receptor type Z, polypeptide 1 [Source:MGI Symbol;Acc:MGI:97816]	Ptprz1	0.696781	0.940016	0.331401	2.30737	0.88021	0.309108
ENSMUSG00000063564	0.558532	1.55507	1.93476	0.164239	0.400621	collagen, type XXIII, alpha 1 [Source:MGI Symbol;Acc:MGI:2653243]	Col23a1	1.39356	3.57206	1.9884	3.28801	3.01786	3.40019
ENSMUSG00000036292	0.557915	0.264929	0.895287	0.344049	0.593878	GRAM domain containing 1C [Source:MGI Symbol;Acc:MGI:2443024]	Gramd1c	0.619361	1.12802	0.795362	0.865265	1.25744	1.63386
ENSMUSG00000044583	0.557618	3.27607	4.62816	0.0314512	0.165972	toll-like receptor 7 [Source:MGI Symbol;Acc:MGI:2176882]	Tlr7	5.03231	8.39748	9.74318	10.8447	8.73923	14.1748
ENSMUSG00000036306	0.557524	2.88258	3.8786	0.0489053	0.20858	leucine zipper, putative tumor suppressor 1 [Source:MGI Symbol;Acc:MGI:2684762]	Lzts1	6.27103	7.89613	3.64541	10.8447	7.60753	7.10949
ENSMUSG00000005699	0.557367	2.34725	3.22493	0.072525	0.256609	par-6 family cell polarity regulator alpha [Source:MGI Symbol;Acc:MGI:1927223]	Pard6a	2.78712	4.88808	4.37449	6.40296	5.59562	5.51979
ENSMUSG00000075327	0.557255	3.29046	4.6318	0.0313846	0.165794	zinc finger and BTB domain containing 2 [Source:MGI Symbol;Acc:MGI:2685949]	Zbtb2	6.65813	9.58816	7.09198	13.7289	9.68231	10.9513
ENSMUSG00000021057	0.557131	2.57827	3.84859	0.0497878	0.210743	A kinase (PRKA) anchor protein 5 [Source:MGI Symbol;Acc:MGI:2685104]	Akap5	7.66459	2.56938	3.38029	13.7866	3.45797	4.28336
ENSMUSG00000008734	0.557113	4.67127	8.39894	0.0037544	0.0562816	G protein-coupled receptor, family C, group 5, member B [Source:MGI Symbol;Acc:MGI:1927596]	Gprc5b	19.4324	25.4431	16.7026	36.2834	28.7326	25.3469
ENSMUSG00000039065	0.557035	3.91442	6.12758	0.0133089	0.107373	family with sequence similarity 173, member B [Source:MGI Symbol;Acc:MGI:1915323]	Fam173b	13.7808	10.8415	11.2676	16.0362	23.7028	14.0865
ENSMUSG00000020251	0.556629	1.05841	1.4837	0.223196	0.473957	glycosyltransferase 8 domain containing 2 [Source:MGI Symbol;Acc:MGI:1922032]	Glt8d2	2.24518	1.31602	1.25932	2.01895	2.64063	2.25207
ENSMUSG00000042532	0.556456	-0.697683	0.36262	0.547055	0.753682	golgi autoantigen, golgin subfamily a, 7B [Source:MGI Symbol;Acc:MGI:1918396]	Golga7b	0	0.689345	0.463961	0	1.06883	0.662375
ENSMUSG00000021221	0.556415	4.00726	8.10137	0.00442318	0.0605564	D4, zinc and double PHD fingers, family 3 [Source:MGI Symbol;Acc:MGI:1917377]	Dpf3	16.4905	12.2829	9.41178	28.2653	15.4666	13.7774
ENSMUSG00000042320	0.556293	1.19821	1.6395	0.200395	0.446298	prospero homeobox 2 [Source:MGI Symbol;Acc:MGI:1920672]	Prox2	2.94196	2.06803	0.596521	3.51874	2.51489	1.50138
ENSMUSG00000019797	0.556114	5.17341	11.3242	0.000765044	0.0263087	RIKEN cDNA 1700021F05 gene [Source:MGI Symbol;Acc:MGI:1915101]	1700021F05Rik	30.7358	23.3751	33.4715	46.8974	37.9748	43.0985
ENSMUSG00000000486	0.555988	0.39749	0.513421	0.473662	0.699628	septin 1 [Source:MGI Symbol;Acc:MGI:1858916]	Sept1	2.01292	1.69203	0	1.73053	1.1317	0.750691
ENSMUSG00000036904	0.55575	3.55445	5.59877	0.0179731	0.125195	frizzled class receptor 8 [Source:MGI Symbol;Acc:MGI:108460]	Fzd8	7.89685	9.9015	10.2071	16.7285	13.0774	11.7461
ENSMUSG00000045316	0.555346	5.62941	9.28006	0.00231662	0.0446358	fumarylacetoacetate hydrolase domain containing 1 [Source:MGI Symbol;Acc:MGI:1915886]	Fahd1	36.6197	39.1673	43.3472	72.0477	53.0641	51.7977
ENSMUSG00000052087	0.555172	0.202889	0.71729	0.397034	0.639059	regulator of G-protein signaling 14 [Source:MGI Symbol;Acc:MGI:1859709]	Rgs14	0.23226	0.752013	1.3256	0.634528	0.565849	2.29623
ENSMUSG00000016028	0.554949	4.82645	7.62443	0.00575828	0.0691521	cadherin, EGF LAG seven-pass G-type receptor 1 [Source:MGI Symbol;Acc:MGI:1100883]	Celsr1	31.0455	26.3204	11.5327	52.3774	26.7207	21.5051
ENSMUSG00000073771	0.554844	1.32552	1.98915	0.15843	0.39254	BTB (POZ) domain containing 19 [Source:MGI Symbol;Acc:MGI:1925861]	Btbd19	1.5484	2.50671	1.72328	2.82653	2.95499	2.60534
ENSMUSG00000038503	0.554773	5.06859	2.34348	0.125808	0.34773	mesoderm development LRP chaperone [Source:MGI Symbol;Acc:MGI:1891421]	Mesd	32.0519	31.6472	14.5816	60.9723	16.3468	44.5999
ENSMUSG00000045071	0.554685	4.01965	6.51834	0.0106767	0.0963406	RIKEN cDNA E130308A19 gene [Source:MGI Symbol;Acc:MGI:2442164]	E130308A19Rik	13.1614	15.4163	10.2071	25.4965	16.0324	16.0736
ENSMUSG00000078185	0.554676	4.33518	6.40431	0.0113843	0.0997044	choroideremia-like [Source:MGI Symbol;Acc:MGI:101913]	Chml	13.2388	14.3509	21.4085	27.6308	22.0053	21.5051
ENSMUSG00000026979	0.554675	2.06373	3.32068	0.0684136	0.249681	pleckstrin and Sec7 domain containing 4 [Source:MGI Symbol;Acc:MGI:2674093]	Psd4	2.78712	2.82005	4.10937	3.92253	4.21243	6.18216
ENSMUSG00000017550	0.554377	2.89071	2.74577	0.0975121	0.303181	ATPase family, AAA domain containing 5 [Source:MGI Symbol;Acc:MGI:2442925]	Atad5	4.2581	5.38942	7.42338	13.152	5.34413	7.90434
ENSMUSG00000038894	0.554164	5.53478	9.42606	0.00213924	0.0427782	insulin receptor substrate 2 [Source:MGI Symbol;Acc:MGI:109334]	Irs2	49.394	33.6526	25.4516	93.2756	39.4837	36.1215
ENSMUSG00000046185	0.553695	4.53647	9.58297	0.00196391	0.0410662	zinc finger protein 84 [Source:MGI Symbol;Acc:MGI:107780]	Zfp84	20.4389	16.0429	19.2875	33.9184	23.3256	25.3027
ENSMUSG00000074733	0.55312	5.32553	9.61083	0.00193433	0.0407454	zinc finger protein 950 [Source:MGI Symbol;Acc:MGI:2652824]	Zfp950	38.7875	29.0152	27.7051	66.0486	32.5049	45.5714
ENSMUSG00000094439	0.552862	2.18141	0.89144	0.345087	0.594443	predicted gene 21969 [Source:MGI Symbol;Acc:MGI:5439438]	Gm21969	6.81297	0.81468	3.84425	6.17222	7.04168	2.16376
ENSMUSG00000049164	0.552372	4.81432	7.71509	0.00547612	0.0674324	zinc finger protein 518A [Source:MGI Symbol;Acc:MGI:1919922]	Zfp518a	18.9679	24.0017	24.7888	40.1483	28.4811	31.3966
ENSMUSG00000040918	0.552257	3.08756	4.24174	0.0394417	0.186963	solute carrier family 19 (thiamine transporter), member 2 [Source:MGI Symbol;Acc:MGI:1928761]	Slc19a2	6.19361	11.3429	3.71169	9.34486	11.6942	7.86018
ENSMUSG00000032702	0.552225	6.48308	4.46351	0.0346263	0.174961	KN motif and ankyrin repeat domains 1 [Source:MGI Symbol;Acc:MGI:2147707]	Kank1	71.4587	91.7455	50.3066	160.478	67.9019	93.7922
ENSMUSG00000049489	0.551789	3.66818	7.19427	0.00731368	0.0780128	family with sequence similarity 58, member B [Source:MGI Symbol;Acc:MGI:1916359]	Fam58b	10.4517	10.7788	9.27922	16.9015	14.2091	13.7332
ENSMUSG00000040229	0.551753	0.815715	1.35789	0.243903	0.497869	G protein-coupled receptor 34 [Source:MGI Symbol;Acc:MGI:1346334]	Gpr34	1.00646	1.19069	1.72328	1.67285	1.69755	2.34039
ENSMUSG00000078853	0.55168	4.15208	6.32297	0.0119184	0.102171	interferon gamma induced GTPase [Source:MGI Symbol;Acc:MGI:107729]	Igtp	11.1485	18.299	13.72	23.1314	18.9245	20.4011
ENSMUSG00000022534	0.55151	1.19207	1.68955	0.193661	0.437668	Mediterranean fever [Source:MGI Symbol;Acc:MGI:1859396]	Mefv	1.08388	1.56669	2.65121	2.07664	2.57776	2.82613
ENSMUSG00000020668	0.551193	4.17034	6.61194	0.0101298	0.0932939	kinesin family member 3C [Source:MGI Symbol;Acc:MGI:107979]	Kif3c	18.1163	18.0483	7.88734	29.7074	18.6102	14.8813
ENSMUSG00000024273	0.550779	1.71912	2.44109	0.118194	0.335917	RIKEN cDNA 2700062C07 gene [Source:MGI Symbol;Acc:MGI:1915296]	2700062C07Rik	2.24518	2.50671	2.78377	4.38401	2.7035	4.15088
ENSMUSG00000032221	0.550558	-0.136036	0.702861	0.401824	0.643291	meiosis-specific nuclear structural protein 1 [Source:MGI Symbol;Acc:MGI:107933]	Mns1	0.3871	0.81468	0.662802	0.576843	1.00595	1.14812
ENSMUSG00000015745	0.550277	5.93132	9.97969	0.00158276	0.0371637	pleckstrin homology domain containing, family O member 1 [Source:MGI Symbol;Acc:MGI:1914470]	Plekho1	44.5165	51.1369	52.0962	83.6423	69.851	63.9412
ENSMUSG00000024528	0.550209	3.59325	5.51377	0.0188674	0.128416	serum response factor binding protein 1 [Source:MGI Symbol;Acc:MGI:1914472]	Srfbp1	7.74201	9.46283	11.7979	16.44	12.3229	13.6449
ENSMUSG00000028885	0.549434	0.783275	0.671919	0.412383	0.651362	sphingomyelin phosphodiesterase, acid-like 3B [Source:MGI Symbol;Acc:MGI:1916022]	Smpdl3b	0	1.9427	2.71749	0.865265	1.63468	2.20792
ENSMUSG00000073409	0.549278	3.42726	4.01221	0.0451718	0.200285	histocompatibility 2, Q region locus 6 [Source:MGI Symbol;Acc:MGI:95935]	H2-Q6	7.50975	12.1575	6.16405	17.5937	10.9398	9.27324
ENSMUSG00000032259	0.549242	-0.158218	0.502828	0.47826	0.703129	dopamine receptor D2 [Source:MGI Symbol;Acc:MGI:94924]	Drd2	0.15484	1.19069	0.662802	0.980634	0.817338	0.750691
ENSMUSG00000092416	0.549158	2.8968	3.75844	0.0525417	0.217288	zinc finger protein 141 [Source:MGI Symbol;Acc:MGI:3584269]	Zfp141	5.34199	5.01342	7.29082	11.3638	7.54466	7.24196
ENSMUSG00000043439	0.548876	0.282336	0.438941	0.507634	0.724591	elongin BC and polycomb repressive complex 2 associated protein [Source:MGI Symbol;Acc:MGI:2143991]	Epop	0.541941	0.877348	0.729082	2.48043	0.188616	1.50138
ENSMUSG00000026803	0.548752	4.42462	6.94589	0.00840119	0.0834514	transcription termination factor, RNA polymerase I [Source:MGI Symbol;Acc:MGI:105044]	Ttf1	15.484	17.735	18.0945	32.9954	21.3137	22.2558
ENSMUSG00000055480	0.54851	2.29372	2.77091	0.0959914	0.301385	zinc finger protein 458 [Source:MGI Symbol;Acc:MGI:3040691]	Zfp458	4.72263	2.75738	3.64541	9.69097	4.71541	3.1794
ENSMUSG00000039633	0.547719	4.41846	8.43451	0.00368165	0.055701	LON peptidase N-terminal domain and ring finger 1 [Source:MGI Symbol;Acc:MGI:3609241]	Lonrf1	21.9099	20.931	9.94202	30.6304	25.9033	18.2374
ENSMUSG00000031487	0.547325	2.99743	4.71874	0.0298357	0.160842	BRF2, RNA polymerase III transcription initiation factor 50kDa subunit [Source:MGI Symbol;Acc:MGI:1913903]	Brf2	6.11619	7.01879	5.83265	11.3638	9.30508	7.4186
ENSMUSG00000050777	0.547063	0.972607	1.24035	0.265404	0.520341	transmembrane protein 37 [Source:MGI Symbol;Acc:MGI:2157899]	Tmem37	1.08388	1.25335	2.05468	2.99959	1.5718	1.94297
ENSMUSG00000079442	0.547061	5.26653	10.9753	0.000923368	0.0293148	ST6 (alpha-N-acetyl-neuraminyl-2,3-beta-galactosyl-1,3)-N-acetylgalactosaminide alpha-2,6-sialyltransferase 4 [Source:MGI Symbol;Acc:MGI:1341894]	St6galnac4	31.1229	29.7672	32.2784	52.2043	41.4328	43.1868
ENSMUSG00000022228	0.546933	6.34923	7.95818	0.00478705	0.0629718	zinc finger and SCAN domain containing 26 [Source:MGI Symbol;Acc:MGI:3531417]	Zscan26	66.7361	54.8343	71.1186	139.135	61.489	94.8079
ENSMUSG00000054648	0.546241	4.25947	4.45324	0.0348352	0.175475	zinc finger protein 869 [Source:MGI Symbol;Acc:MGI:1914119]	Zfp869	13.3937	13.7869	17.1003	36.2258	14.4606	18.9439
ENSMUSG00000027300	0.546076	3.08482	5.24027	0.0220698	0.138247	U box domain containing 5 [Source:MGI Symbol;Acc:MGI:2154658]	Ubox5	7.97427	7.26946	5.23613	10.3832	10.5625	8.65503
ENSMUSG00000044921	0.545781	3.76102	5.58138	0.0181525	0.125771	Ras association (RalGDS/AF-6) domain family (N-terminal) member 9 [Source:MGI Symbol;Acc:MGI:2384307]	Rassf9	13.6259	11.0922	6.6943	27.9769	11.8828	9.3174
ENSMUSG00000074890	0.545774	3.83046	6.31442	0.011976	0.102488	leucine carboxyl methyltransferase 2 [Source:MGI Symbol;Acc:MGI:1353659]	Lcmt2	8.74847	8.58548	17.2328	17.536	11.1912	20.8869
ENSMUSG00000094942	0.545658	1.34531	1.38357	0.239494	0.491981	predicted gene 3604 [Source:MGI Symbol;Acc:MGI:3781781]	Gm3604	1.31614	1.31602	3.38029	3.80717	2.13765	2.42871
ENSMUSG00000049775	0.545544	7.94629	7.67108	0.00561129	0.0680846	thymosin, beta 4, X chromosome [Source:MGI Symbol;Acc:MGI:99510]	Tmsb4x	185.266	173.402	229.528	370.622	184.09	335.78
ENSMUSG00000096370	0.545342	2.97328	3.48401	0.0619643	0.236693	predicted gene 21992 [Source:MGI Symbol;Acc:MGI:5439461]	Gm21992	6.11619	5.38942	6.56174	14.6518	7.10455	6.44711
ENSMUSG00000059939	0.545089	2.76823	2.99539	0.0835019	0.277535	RIKEN cDNA 9430015G10 gene [Source:MGI Symbol;Acc:MGI:2444364]	9430015G10Rik	4.33552	4.26141	7.3571	11.4215	5.09265	7.4186
ENSMUSG00000033705	0.544477	6.27834	7.06328	0.00786799	0.0805993	START domain containing 9 [Source:MGI Symbol;Acc:MGI:3045258]	Stard9	74.4007	52.0769	53.0241	153.844	51.4294	79.9707
ENSMUSG00000045392	0.544392	2.66892	4.04209	0.0443788	0.198448	olfactory receptor 1033 [Source:MGI Symbol;Acc:MGI:3030867]	Olfr1033	5.96135	4.57474	4.44077	10.3255	5.97286	6.04969
ENSMUSG00000030554	0.544152	4.80419	7.74711	0.00537985	0.0667489	synemin, intermediate filament protein [Source:MGI Symbol;Acc:MGI:2661187]	Synm	23.9228	21.4324	20.7457	48.4548	24.7716	27.3782
ENSMUSG00000037106	0.544089	-0.129053	0.596847	0.439784	0.674675	fer-1-like 6 (C. elegans) [Source:MGI Symbol;Acc:MGI:3645398]	Fer1l6	0.541941	1.12802	0.331401	0.922949	0.817338	0.927324
ENSMUSG00000070814	0.543926	4.0749	4.47486	0.034397	0.174168	RIKEN cDNA 6330408A02 gene [Source:MGI Symbol;Acc:MGI:2447816]	6330408A02Rik	11.8453	15.6043	12.1955	29.4767	13.8947	17.0893
ENSMUSG00000075040	0.543853	3.4126	6.1249	0.0133291	0.107403	zinc finger protein 408 [Source:MGI Symbol;Acc:MGI:2685857]	Zfp408	9.67751	6.89345	8.81526	14.7095	8.73923	14.0423
ENSMUSG00000036721	0.543825	3.21657	4.0124	0.0451668	0.200285	zinc finger and SCAN domain containing 12 [Source:MGI Symbol;Acc:MGI:1099444]	Zscan12	6.89039	8.77348	6.23033	15.6901	8.8021	8.47839
ENSMUSG00000062309	0.543791	1.33572	1.64894	0.199104	0.444568	ribonuclease P/MRP 25 subunit [Source:MGI Symbol;Acc:MGI:2143151]	Rpp25	2.24518	1.31602	2.31981	2.88422	3.3951	2.25207
ENSMUSG00000038624	0.543739	1.82491	2.21429	0.136738	0.362981	nephrocan [Source:MGI Symbol;Acc:MGI:1913900]	Nepn	3.01938	3.63473	1.657	5.8838	3.14361	3.09108
ENSMUSG00000021579	0.543635	6.61804	9.43741	0.00212603	0.0427465	leucine rich repeat containing 14B [Source:MGI Symbol;Acc:MGI:2145269]	Lrrc14b	74.7878	84.5388	78.8071	140	101.727	108.497
ENSMUSG00000043556	0.543619	1.06335	1.25414	0.262762	0.517313	F-box and leucine-rich repeat protein 7 [Source:MGI Symbol;Acc:MGI:3052506]	Fbxl7	1.78066	1.50403	1.06048	4.67243	1.94904	0.883166
ENSMUSG00000069763	0.543442	3.22517	4.91686	0.0265959	0.151702	transmembrane protein 100 [Source:MGI Symbol;Acc:MGI:1915138]	Tmem100	2.16776	7.58279	13.3223	4.09559	10.814	16.7802
ENSMUSG00000007207	0.543052	0.919649	1.14477	0.284646	0.540018	syntaxin 1A (brain) [Source:MGI Symbol;Acc:MGI:109355]	Stx1a	1.78066	1.88003	0.729082	2.42274	1.5718	2.1196
ENSMUSG00000071347	0.54305	5.27041	7.67395	0.00560236	0.0680846	C1q and tumor necrosis factor related protein 9 [Source:MGI Symbol;Acc:MGI:3045252]	C1qtnf9	27.0196	31.2712	34.8634	57.569	39.1065	40.7581
ENSMUSG00000034936	0.543002	3.6301	5.27627	0.021618	0.137291	ADP-ribosylation factor-like 4D [Source:MGI Symbol;Acc:MGI:1933155]	Arl4d	8.82589	10.1522	10.4723	19.2089	12.3229	12.3643
ENSMUSG00000020807	0.542389	3.33361	5.38221	0.0203431	0.133417	RIKEN cDNA 4933427D14 gene [Source:MGI Symbol;Acc:MGI:1921727]	4933427D14Rik	7.74201	7.9588	8.3513	14.4788	10.0595	10.9513
ENSMUSG00000028104	0.542017	4.37289	8.78963	0.00302949	0.0511067	polymerase (RNA) III (DNA directed) polypeptide G like [Source:MGI Symbol;Acc:MGI:1917120]	Polr3gl	15.0195	16.7323	18.4922	25.5542	23.6399	23.8896
ENSMUSG00000005483	0.54175	4.59068	9.16381	0.00246849	0.0461733	DnaJ heat shock protein family (Hsp40) member B1 [Source:MGI Symbol;Acc:MGI:1931874]	Dnajb1	17.6518	18.7376	22.005	30.4573	24.6459	30.0276
ENSMUSG00000042182	0.541588	0.0683081	0.751113	0.386124	0.629777	BEN domain containing 6 [Source:MGI Symbol;Acc:MGI:2444572]	Bend6	0.774201	0.752013	0.662802	0.749896	1.1317	1.36891
ENSMUSG00000109946	0.541379	1.5074	1.95276	0.16229	0.397775	DNA segment, Chr 2, Brigham & Women's Genetics 1423 expressed [Source:MGI Symbol;Acc:MGI:106557]	D2Bwg1423e	1.5484	2.44404	2.58493	3.74948	2.76638	3.04692
ENSMUSG00000026749	0.541331	3.18058	2.0929	0.147985	0.377929	NIMA (never in mitosis gene a)-related expressed kinase 6 [Source:MGI Symbol;Acc:MGI:1891638]	Nek6	2.40002	9.9015	11.2676	10.0948	9.17934	10.4655
ENSMUSG00000043279	0.541159	6.22293	9.31221	0.00227631	0.0444076	tripartite motif-containing 56 [Source:MGI Symbol;Acc:MGI:2685298]	Trim56	60.2328	58.7197	61.2429	113.638	75.5723	77.8069
ENSMUSG00000030351	0.540949	0.249567	0.675004	0.411313	0.650533	tetraspanin 11 [Source:MGI Symbol;Acc:MGI:1915748]	Tspan11	0.619361	0.877348	0.994202	1.67285	1.69755	0.574058
ENSMUSG00000027425	0.540937	5.31105	8.7215	0.00314479	0.0517719	lysine acetyltransferase 14 [Source:MGI Symbol;Acc:MGI:1917264]	Kat14	33.6777	35.4073	26.5121	63.222	39.4208	39.0359
ENSMUSG00000024457	0.540762	4.51608	6.68222	0.0097379	0.0911329	tripartite motif-containing 26 [Source:MGI Symbol;Acc:MGI:1337056]	Trim26	25.2389	10.7788	20.4806	35.8797	22.5711	21.5934
ENSMUSG00000031953	0.540706	1.68305	2.22565	0.135735	0.361391	transmembrane protein 170 [Source:MGI Symbol;Acc:MGI:106426]	Tmem170	2.24518	2.69471	2.45237	4.15327	4.58967	2.38455
ENSMUSG00000034194	0.540647	3.77336	6.65335	0.00989694	0.0916397	R3H domain and coiled-coil containing 1 [Source:MGI Symbol;Acc:MGI:1919093]	R3hcc1	9.60009	11.6562	11.6653	16.3823	13.6433	18.0166
ENSMUSG00000031107	0.540515	1.09044	1.38983	0.238435	0.491015	RNA binding motif protein, X-linked 2 [Source:MGI Symbol;Acc:MGI:1919414]	Rbmx2	0.929041	2.00537	1.9884	2.48043	2.32627	2.16376
ENSMUSG00000069920	0.53998	3.04642	4.74642	0.0293594	0.1595	UDP-GlcNAc:betaGal beta-1,3-N-acetylglucosaminyltransferase 9 [Source:MGI Symbol;Acc:MGI:2142841]	B3gnt9	5.41941	6.45478	8.0199	9.46023	9.80806	9.44988
ENSMUSG00000071551	0.539537	0.0255193	0.723187	0.395101	0.637387	aldo-keto reductase family 1, member C19 [Source:MGI Symbol;Acc:MGI:2653678]	Akr1c19	1.08388	0.313339	0.861642	1.32674	0.754466	1.01564
ENSMUSG00000048410	0.53947	6.06089	7.1918	0.00732375	0.0780128	zinc finger protein 407 [Source:MGI Symbol;Acc:MGI:2685179]	Zfp407	56.3618	48.3795	52.3613	122.81	56.9622	62.749
ENSMUSG00000033066	0.539429	4.16104	4.62368	0.0315335	0.166125	growth arrest specific 7 [Source:MGI Symbol;Acc:MGI:1202388]	Gas7	8.82589	30.2058	7.95362	12.979	27.4751	18.8998
ENSMUSG00000045333	0.539418	2.55372	3.91626	0.0478213	0.206239	zinc finger protein 423 [Source:MGI Symbol;Acc:MGI:1891217]	Zfp423	6.89039	3.6974	3.44657	10.1524	5.09265	5.21068
ENSMUSG00000041645	0.539375	6.69936	10.5048	0.00119064	0.032729	DEAD (Asp-Glu-Ala-Asp) box polypeptide 24 [Source:MGI Symbol;Acc:MGI:1351337]	Ddx24	80.5943	88.4242	84.2421	137.404	111.661	120.199
ENSMUSG00000050567	0.539021	4.62666	8.72384	0.00314076	0.0517719	mastermind like 1 (Drosophila) [Source:MGI Symbol;Acc:MGI:1890504]	Maml1	25.4712	24.9418	10.6048	38.0717	30.2415	18.1932
ENSMUSG00000007827	0.538973	3.39098	6.06621	0.0137792	0.109349	ankyrin repeat domain 26 [Source:MGI Symbol;Acc:MGI:1917887]	Ankrd26	8.74847	8.58548	7.88734	14.075	11.7571	10.9954
ENSMUSG00000036381	0.538932	1.79757	2.35869	0.124586	0.346567	purinergic receptor P2Y, G-protein coupled, 14 [Source:MGI Symbol;Acc:MGI:2155705]	P2ry14	1.85808	2.50671	3.64541	3.86485	2.57776	5.299
ENSMUSG00000061461	0.538269	4.94596	9.05826	0.00261511	0.0473249	small integral membrane protein 20 [Source:MGI Symbol;Acc:MGI:1913528]	Smim20	21.9099	30.4565	22.2039	26.0156	42.9417	40.3607
ENSMUSG00000037070	0.538094	3.83744	6.86232	0.00880323	0.0859945	RNA binding motif protein, X-linked like-1 [Source:MGI Symbol;Acc:MGI:1343045]	Rbmxl1	10.9937	10.0895	13.1898	19.6127	12.3229	18.5023
ENSMUSG00000056952	0.537814	5.96827	7.8821	0.00499265	0.0640683	TatD DNase domain containing 2 [Source:MGI Symbol;Acc:MGI:3576210]	Tatdn2	50.2456	45.9981	53.6206	103.889	59.98	60.9826
ENSMUSG00000021068	0.537643	6.09065	8.64727	0.00327551	0.0531794	ninein [Source:MGI Symbol;Acc:MGI:105108]	Nin	57.7554	51.8889	53.6869	109.081	58.4711	77.0121
ENSMUSG00000061143	0.537617	3.80259	5.82741	0.0157784	0.116862	mastermind like 3 (Drosophila) [Source:MGI Symbol;Acc:MGI:2389461]	Maml3	13.084	11.5309	8.41758	25.035	12.2601	12.541
ENSMUSG00000020169	0.537518	3.05928	3.51742	0.0607268	0.234195	bestrophin 3 [Source:MGI Symbol;Acc:MGI:3580298]	Best3	11.8453	8.39748	1.657	13.2674	9.87093	4.50415
ENSMUSG00000030170	0.537253	1.46377	1.45296	0.228053	0.480101	wingless-type MMTV integration site family, member 5B [Source:MGI Symbol;Acc:MGI:98959]	Wnt5b	1.08388	2.50671	2.51865	2.65348	1.5718	4.98989
ENSMUSG00000046916	0.537129	3.90283	7.1606	0.00745224	0.0785037	myc target 1 [Source:MGI Symbol;Acc:MGI:1915882]	Myct1	13.4711	13.8496	9.21294	18.5167	17.4156	16.3827
ENSMUSG00000045435	0.536937	3.88861	5.98706	0.0144112	0.111489	transmembrane protein 60 [Source:MGI Symbol;Acc:MGI:2673965]	Tmem60	11.3808	9.14949	15.7747	17.3053	17.6042	16.736
ENSMUSG00000044763	0.53682	4.44106	8.03158	0.00459688	0.0617727	tRNA methyltransferase 10C [Source:MGI Symbol;Acc:MGI:1196261]	Trmt10c	15.3292	15.4789	22.1376	27.8038	21.6909	26.8483
ENSMUSG00000043518	0.536783	4.84631	9.37668	0.00219764	0.0435959	retinoic acid induced 2 [Source:MGI Symbol;Acc:MGI:1344378]	Rai2	26.2454	25.1924	18.4922	42.4557	30.1786	29.1445
ENSMUSG00000044864	0.536658	6.60786	9.22246	0.00239064	0.0453523	ankyrin repeat domain 50 [Source:MGI Symbol;Acc:MGI:2139777]	Ankrd50	69.6781	95.3176	74.2338	126.963	111.598	106.422
ENSMUSG00000074166	0.536591	2.93005	1.59693	0.206339	0.45373	expressed sequence AW146154 [Source:MGI Symbol;Acc:MGI:2142212]	AW146154	3.4839	5.26409	8.48386	15.9209	4.90403	6.6679
ENSMUSG00000106247	0.536464	-0.197491	0.271906	0.602056	0.789761	predicted gene 43720 [Source:MGI Symbol;Acc:MGI:5663857]	Gm43720	0	1.56669	0.662802	0.807581	0.440105	0.883166
ENSMUSG00000026069	0.536365	1.07866	0.906698	0.340992	0.590758	interleukin 1 receptor-like 1 [Source:MGI Symbol;Acc:MGI:98427]	Il1rl1	1.47098	3.00805	0.662802	2.192	1.69755	2.69366
ENSMUSG00000042254	0.536295	5.99859	8.63938	0.00328973	0.0532678	cartilage intermediate layer protein, nucleotide pyrophosphohydrolase [Source:MGI Symbol;Acc:MGI:2444507]	Cilp	53.1876	45.9354	54.2834	104.005	57.1508	68.0921
ENSMUSG00000038880	0.536126	5.10052	8.2195	0.00414425	0.0592127	mitochondrial ribosomal protein S34 [Source:MGI Symbol;Acc:MGI:1930188]	Mrps34	26.7873	28.7645	26.6446	41.1289	53.3156	28.4379
ENSMUSG00000098112	0.536003	2.01707	2.19722	0.13826	0.364997	bridging integrator 2 [Source:MGI Symbol;Acc:MGI:3611448]	Bin2	1.85808	3.07072	4.83845	5.01854	4.08669	4.45999
ENSMUSG00000056025	0.535341	1.73551	2.15511	0.142096	0.370057	chloride channel accessory 3A1 [Source:MGI Symbol;Acc:MGI:1316732]	Clca3a1	1.62582	3.25872	2.98261	3.80717	4.40105	3.04692
ENSMUSG00000002565	0.535327	2.45087	3.78321	0.0517692	0.215875	scinderin [Source:MGI Symbol;Acc:MGI:1306794]	Scin	4.41294	3.76006	4.83845	6.40296	5.59562	6.84454
ENSMUSG00000048582	0.535282	3.4594	4.28495	0.0384512	0.184335	gap junction protein, alpha 3 [Source:MGI Symbol;Acc:MGI:95714]	Gja3	8.12911	9.52549	8.15246	18.9205	11.82	8.61087
ENSMUSG00000078870	0.53516	3.12862	2.45495	0.117155	0.333614	predicted gene 14410 [Source:MGI Symbol;Acc:MGI:3709158]	Gm14410	5.18715	5.6401	10.406	13.4404	9.99667	6.97701
ENSMUSG00000090015	0.535	2.06893	2.16867	0.140848	0.368635	predicted gene 15446 [Source:MGI Symbol;Acc:MGI:3709333]	Gm15446	4.87747	5.51476	0.331401	7.78738	5.15552	1.01564
ENSMUSG00000000776	0.534993	4.48458	8.38121	0.0037912	0.0564925	polymerase (RNA) III (DNA directed) polypeptide D [Source:MGI Symbol;Acc:MGI:1914315]	Polr3d	16.5679	18.9883	18.7573	29.1306	23.137	26.7158
ENSMUSG00000052837	0.534923	5.57608	8.34653	0.00386426	0.0571439	jun B proto-oncogene [Source:MGI Symbol;Acc:MGI:96647]	Junb	35.3036	41.7367	38.3762	69.9711	55.5161	44.4233
ENSMUSG00000001751	0.534765	4.29337	8.11219	0.00439685	0.0603853	alpha-N-acetylglucosaminidase (Sanfilippo disease IIIB) [Source:MGI Symbol;Acc:MGI:1351641]	Naglu	15.484	15.4163	16.5038	26.6502	19.3646	23.2273
ENSMUSG00000040616	0.534692	3.09634	4.63729	0.0312843	0.165435	transmembrane protein 51 [Source:MGI Symbol;Acc:MGI:2384874]	Tmem51	4.02584	3.19605	13.3886	6.86444	4.27531	18.1049
ENSMUSG00000052056	0.534445	4.78464	8.87099	0.00289739	0.0499494	zinc finger protein 217 [Source:MGI Symbol;Acc:MGI:2685408]	Zfp217	24.3873	23.6257	18.9561	39.283	27.6638	30.5134
ENSMUSG00000002897	0.534353	4.05646	4.46109	0.0346753	0.174972	interleukin 17 receptor A [Source:MGI Symbol;Acc:MGI:107399]	Il17ra	9.67751	15.3536	15.1782	24.6312	19.3646	14.7047
ENSMUSG00000032537	0.534234	2.35264	3.44812	0.0633237	0.239719	Eph receptor B1 [Source:MGI Symbol;Acc:MGI:1096337]	Ephb1	5.34199	4.70008	2.31981	7.61433	6.03573	3.93009
ENSMUSG00000025758	0.53421	2.81568	4.16072	0.0413717	0.190893	polo-like kinase 4 [Source:MGI Symbol;Acc:MGI:101783]	Plk4	5.10973	5.38942	6.23033	8.71033	6.35009	9.40572
ENSMUSG00000025484	0.533822	4.05793	6.40731	0.0113652	0.0996921	Bet1 golgi vesicular membrane trafficking protein like [Source:MGI Symbol;Acc:MGI:1913128]	Bet1l	12.2324	13.4736	14.2502	23.3045	14.3977	21.196
ENSMUSG00000039967	0.533535	6.78271	8.52777	0.00349768	0.0542856	zinc finger protein 292 [Source:MGI Symbol;Acc:MGI:1353423]	Zfp292	92.6718	79.4	92.6597	179.687	99.5895	115.651
ENSMUSG00000046191	0.533412	2.53898	3.3383	0.0676845	0.248265	protocadherin beta 20 [Source:MGI Symbol;Acc:MGI:2136758]	Pcdhb20	5.57425	4.01073	3.84425	10.9023	4.40105	5.299
ENSMUSG00000033446	0.53329	3.69485	6.50291	0.0107698	0.0968468	lysophosphatidic acid receptor 6 [Source:MGI Symbol;Acc:MGI:1914418]	Lpar6	10.9937	9.02415	11.0025	18.8051	11.0655	15.8087
ENSMUSG00000048755	0.533144	5.13328	10.8678	0.000978517	0.0297904	malonyl CoA:ACP acyltransferase (mitochondrial) [Source:MGI Symbol;Acc:MGI:2388651]	Mcat	29.3422	29.3912	26.9097	44.0708	39.5466	40.3607
ENSMUSG00000046111	0.533102	4.02988	7.72416	0.00544867	0.0672842	centrosomal protein 295 [Source:MGI Symbol;Acc:MGI:2442521]	Cep295	15.9485	12.8469	10.6711	25.4965	16.0324	16.1619
ENSMUSG00000049551	0.532767	1.18055	1.43261	0.231339	0.483568	frizzled class receptor 9 [Source:MGI Symbol;Acc:MGI:1313278]	Fzd9	1.5484	1.81736	1.72328	2.99959	3.3951	1.41307
ENSMUSG00000025407	0.53241	0.250782	0.637641	0.424566	0.662206	GLI-Kruppel family member GLI1 [Source:MGI Symbol;Acc:MGI:95727]	Gli1	0.619361	1.06535	0.729082	2.07664	1.50893	0.441583
ENSMUSG00000051220	0.532209	1.71976	2.04793	0.152413	0.384317	excision repair cross-complementing rodent repair deficiency complementation group 6 like [Source:MGI Symbol;Acc:MGI:2654144]	Ercc6l	1.62582	2.75738	3.38029	4.09559	3.14361	3.79761
ENSMUSG00000027524	0.532187	2.38131	3.54806	0.0596151	0.232118	endothelin 3 [Source:MGI Symbol;Acc:MGI:95285]	Edn3	2.63228	4.63741	5.03729	3.63411	6.97881	7.28612
ENSMUSG00000096146	0.532127	7.22751	9.13753	0.00250419	0.0464729	potassium inwardly rectifying channel, subfamily J, member 11 [Source:MGI Symbol;Acc:MGI:107501]	Kcnj11	126.117	128.218	110.423	220.47	155.231	157.778
ENSMUSG00000107877	0.531969	-0.0609173	0.677654	0.410396	0.649867	predicted gene, 43951 [Source:MGI Symbol;Acc:MGI:5690343]	Gm43951	0.541941	0.689345	0.729082	0.576843	1.06883	1.28059
ENSMUSG00000028709	0.531486	3.71169	4.97078	0.025779	0.149648	MOB kinase activator 3C [Source:MGI Symbol;Acc:MGI:2140623]	Mob3c	8.90331	10.4028	12.063	19.9011	11.7571	14.5722
ENSMUSG00000031506	0.53122	1.78007	2.5443	0.110693	0.323455	protein tyrosine phosphatase, non-receptor type 7 [Source:MGI Symbol;Acc:MGI:2156893]	Ptpn7	1.85808	2.44404	3.64541	2.82653	3.20648	5.51979
ENSMUSG00000060181	0.530914	3.25675	5.39868	0.020152	0.132839	solute carrier family 35, member E3 [Source:MGI Symbol;Acc:MGI:2448489]	Slc35e3	8.90331	7.26946	6.95942	12.1714	11.5056	9.71483
ENSMUSG00000047867	0.530781	5.34524	10.4007	0.00125966	0.0332743	GTPase, IMAP family member 6 [Source:MGI Symbol;Acc:MGI:1918876]	Gimap6	30.4261	28.2631	40.696	50.4161	38.4778	54.5355
ENSMUSG00000022803	0.530775	8.81197	12.0371	0.000521531	0.0208963	popeye domain containing 2 [Source:MGI Symbol;Acc:MGI:1930150]	Popdc2	400.572	368.236	332.925	600.955	507.001	486.006
ENSMUSG00000059486	0.530443	5.63495	9.09006	0.00257003	0.0467673	kelch repeat and BTB (POZ) domain containing 2 [Source:MGI Symbol;Acc:MGI:2384811]	Kbtbd2	39.252	36.8486	44.9379	71.0094	52.7497	52.4159
ENSMUSG00000011427	0.530038	4.78661	6.26365	0.012324	0.103839	zinc finger protein 790 [Source:MGI Symbol;Acc:MGI:1923431]	Zfp790	21.755	21.3697	22.469	47.4165	27.9152	23.8013
ENSMUSG00000047298	0.529509	4.04916	6.67712	0.00976581	0.0911337	potassium channel, subfamily V, member 2 [Source:MGI Symbol;Acc:MGI:2670981]	Kcnv2	18.426	14.1002	7.15826	32.2455	15.718	10.9954
ENSMUSG00000058258	0.529264	1.65816	1.18778	0.275778	0.531844	isopentenyl-diphosphate delta isomerase [Source:MGI Symbol;Acc:MGI:2442264]	Idi1	0.3871	2.00537	6.49546	1.67285	3.64659	3.79761
ENSMUSG00000023951	0.52914	7.46007	8.54116	0.00347204	0.0542856	vascular endothelial growth factor A [Source:MGI Symbol;Acc:MGI:103178]	Vegfa	150.659	125.085	149.13	278.731	150.453	201.406
ENSMUSG00000051671	0.52909	3.64211	6.72532	0.00950538	0.0897905	cytochrome c oxidase assembly factor 6 [Source:MGI Symbol;Acc:MGI:1915142]	Coa6	9.67751	9.21216	11.4002	14.3634	13.769	15.4996
ENSMUSG00000048481	0.529005	1.75373	2.29455	0.129829	0.353569	Myb-related transcription factor, partner of profilin [Source:MGI Symbol;Acc:MGI:2446472]	Mypop	2.7097	2.88272	2.18725	5.36464	3.96095	2.38455
ENSMUSG00000048070	0.528872	5.28556	7.22413	0.00719301	0.0774846	phosphoinositide-interacting regulator of transient receptor potential channels [Source:MGI Symbol;Acc:MGI:2443635]	Pirt	28.4906	38.854	28.0365	55.4923	39.1694	42.966
ENSMUSG00000045973	0.528803	5.98127	2.16044	0.141604	0.369287	solute carrier family 25, member 51 [Source:MGI Symbol;Acc:MGI:2684984]	Slc25a51	78.7362	60.2864	23.1318	50.07	75.6981	90.2154
ENSMUSG00000012296	0.528483	4.38236	8.3567	0.00384267	0.0568889	tight junction associated protein 1 [Source:MGI Symbol;Acc:MGI:1921344]	Tjap1	17.5744	18.863	14.3828	28.6114	23.1998	21.5934
ENSMUSG00000025184	0.528225	5.51779	8.58932	0.0033814	0.0539533	R3H domain and coiled-coil containing 1 like [Source:MGI Symbol;Acc:MGI:1196316]	R3hcc1l	35.3036	33.8406	42.353	66.9715	45.6452	49.8106
ENSMUSG00000038775	0.528197	-0.242008	0.570237	0.450165	0.682409	villin-like [Source:MGI Symbol;Acc:MGI:1201781]	Vill	0.23226	0.626677	0.927922	0.461475	1.1317	0.883166
ENSMUSG00000026347	0.528054	0.774117	0.57938	0.446555	0.680005	transmembrane protein 163 [Source:MGI Symbol;Acc:MGI:1919410]	Tmem163	0	4.82541	0.596521	0.576843	2.57776	0.927324
ENSMUSG00000028458	0.527944	5.38867	10.7805	0.00102573	0.0303326	testis specific protein kinase 1 [Source:MGI Symbol;Acc:MGI:1201675]	Tesk1	40.723	31.2085	30.6877	57.1652	42.1243	48.53
ENSMUSG00000053012	0.527774	5.7039	8.62712	0.00331195	0.0533742	lysine-rich coiled-coil 1 [Source:MGI Symbol;Acc:MGI:1889377]	Krcc1	34.7616	35.1566	59.5859	63.9142	51.618	66.6349
ENSMUSG00000041445	0.52771	5.91959	9.26195	0.00233963	0.044947	multimerin 2 [Source:MGI Symbol;Acc:MGI:2385618]	Mmrn2	51.794	49.8835	44.9379	93.9678	60.2944	61.38
ENSMUSG00000048216	0.527018	-0.219625	0.612436	0.433872	0.670353	G protein-coupled receptor 85 [Source:MGI Symbol;Acc:MGI:1927851]	Gpr85	0.464521	0.376006	0.927922	0.749896	0.565849	1.19227
ENSMUSG00000018599	0.526952	5.59613	8.31682	0.00392796	0.0576294	mitochondrial elongation factor 2 [Source:MGI Symbol;Acc:MGI:2144199]	Mief2	37.0068	36.7233	43.6123	72.6246	45.7081	53.564
ENSMUSG00000039763	0.526936	5.60916	8.52309	0.00350668	0.0542856	DnaJ heat shock protein family (Hsp40) member C28 [Source:MGI Symbol;Acc:MGI:2181053]	Dnajc28	34.2971	39.4807	45.7333	65.6448	50.2977	56.3902
ENSMUSG00000044149	0.526917	2.52044	3.3099	0.0688635	0.250323	NF-kappaB repressing factor [Source:MGI Symbol;Acc:MGI:1924536]	Nkrf	4.02584	4.38674	5.30241	6.80675	7.54466	5.51979
ENSMUSG00000031480	0.526884	3.72173	6.57662	0.0103327	0.0943217	thrombospondin, type I, domain 1 [Source:MGI Symbol;Acc:MGI:1929096]	Thsd1	11.1485	11.1549	9.54434	19.0935	14.775	12.5851
ENSMUSG00000020346	0.526299	5.04948	9.86653	0.00168312	0.0383868	mannoside acetylglucosaminyltransferase 1 [Source:MGI Symbol;Acc:MGI:96973]	Mgat1	49.1618	16.0429	17.6968	63.8566	25.589	25.7885
ENSMUSG00000032845	0.526224	9.02673	9.30782	0.00228177	0.0444076	alpha-kinase 2 [Source:MGI Symbol;Acc:MGI:2449492]	Alpk2	463.591	520.957	274.599	883.378	629.728	356.446
ENSMUSG00000037833	0.525871	-0.427194	0.313879	0.575309	0.772701	SH2 domain containing 4B [Source:MGI Symbol;Acc:MGI:1925182]	Sh2d4b	0.851621	1.00268	0	1.03832	0.440105	0.441583
ENSMUSG00000078435	0.525808	3.1355	3.5782	0.0585426	0.230407	expressed sequence AU041133 [Source:MGI Symbol;Acc:MGI:2143755]	AU041133	6.96781	6.32944	7.15826	16.1516	7.98476	7.28612
ENSMUSG00000035109	0.52569	0.858973	0.978739	0.32251	0.574355	SHC (Src homology 2 domain containing) family, member 4 [Source:MGI Symbol;Acc:MGI:2655364]	Shc4	1.1613	2.1307	0.861642	1.61516	1.63468	2.51702
ENSMUSG00000036356	0.524912	3.98702	4.6615	0.0308463	0.164421	chondroitin sulfate N-acetylgalactosaminyltransferase 1 [Source:MGI Symbol;Acc:MGI:2442354]	Csgalnact1	12.0001	12.7842	12.5269	28.15	16.4725	12.3643
ENSMUSG00000048696	0.524806	3.58814	6.0293	0.0140703	0.110231	mex3 RNA binding family member D [Source:MGI Symbol;Acc:MGI:2681847]	Mex3d	10.6066	7.39479	11.0688	17.7668	10.5625	13.8216
ENSMUSG00000044147	0.524507	6.1712	10.1921	0.00141043	0.0349813	ADP-ribosylation factor 6 [Source:MGI Symbol;Acc:MGI:99435]	Arf6	49.3166	52.7036	75.1617	81.6233	69.0336	103.375
ENSMUSG00000027952	0.524343	3.31975	5.2294	0.0222081	0.138778	phosphomevalonate kinase [Source:MGI Symbol;Acc:MGI:1915853]	Pmvk	7.50975	9.02415	7.62222	13.0367	11.3799	10.4214
ENSMUSG00000047036	0.524196	6.55077	6.45852	0.0110422	0.0980287	zinc finger protein 445 [Source:MGI Symbol;Acc:MGI:2143340]	Zfp445	75.4846	75.7026	71.7151	167.977	86.3235	84.3865
ENSMUSG00000039804	0.524149	4.58827	5.79465	0.016075	0.117689	nuclear receptor coactivator 5 [Source:MGI Symbol;Acc:MGI:2385165]	Ncoa5	25.5486	17.4216	13.9851	45.3399	15.9067	25.2144
ENSMUSG00000063838	0.523893	1.72291	2.35268	0.125068	0.346903	CDC42 effector protein (Rho GTPase binding) 5 [Source:MGI Symbol;Acc:MGI:1929745]	Cdc42ep5	2.40002	2.75738	2.58493	3.92253	4.33818	3.00276
ENSMUSG00000040435	0.523893	4.95016	9.91838	0.00163636	0.0376444	protein phosphatase 1, regulatory (inhibitor) subunit 15A [Source:MGI Symbol;Acc:MGI:1927072]	Ppp1r15a	29.4971	21.871	23.7946	46.6666	28.4182	34.311
ENSMUSG00000040025	0.523742	5.50001	8.4974	0.00355655	0.0547566	YTH domain family 2 [Source:MGI Symbol;Acc:MGI:2444233]	Ythdf2	32.2068	35.4699	43.2809	61.1454	46.8398	51.5769
ENSMUSG00000048706	0.523537	1.43207	1.92809	0.164968	0.4016	leucine rich adaptor protein 1-like [Source:MGI Symbol;Acc:MGI:106510]	Lurap1l	2.3226	2.50671	1.45816	4.15327	2.76638	2.20792
ENSMUSG00000044068	0.523239	4.24541	6.45827	0.0110437	0.0980287	zinc finger (CCCH type), RNA binding motif and serine/arginine rich 1 [Source:MGI Symbol;Acc:MGI:98885]	Zrsr1	14.4776	15.3536	15.9072	28.6691	17.7928	20.6219
ENSMUSG00000043017	0.522981	3.03146	3.50826	0.0610635	0.234964	prostaglandin I receptor (IP) [Source:MGI Symbol;Acc:MGI:99535]	Ptgir	6.89039	6.95612	5.03729	15.4594	8.8021	5.16652
ENSMUSG00000005370	0.52287	4.71477	8.23895	0.00410007	0.0589711	mutS homolog 6 [Source:MGI Symbol;Acc:MGI:1343961]	Msh6	20.0518	21.683	22.2701	35.822	27.4751	29.277
ENSMUSG00000026925	0.522764	4.93628	8.72156	0.00314469	0.0517719	inositol polyphosphate-5-phosphatase E [Source:MGI Symbol;Acc:MGI:1927753]	Inpp5e	30.7358	26.9471	18.1608	40.1483	33.951	32.8979
ENSMUSG00000029642	0.522641	5.26096	9.83006	0.00171682	0.0387157	polymerase (RNA) I polypeptide D [Source:MGI Symbol;Acc:MGI:108403]	Polr1d	30.8132	31.2712	31.6156	51.6852	40.3011	43.4076
ENSMUSG00000051439	0.522628	3.41924	4.75207	0.0292631	0.159254	CD14 antigen [Source:MGI Symbol;Acc:MGI:88318]	Cd14	6.89039	8.1468	10.8699	14.1903	9.74519	13.2917
ENSMUSG00000055692	0.52219	0.788427	1.17489	0.278399	0.534914	transmembrane protein 191C [Source:MGI Symbol;Acc:MGI:107238]	Tmem191c	1.47098	1.69203	0.795362	2.48043	2.01191	1.19227
ENSMUSG00000027022	0.521992	12.4877	17.4068	3.01747e-05	0.00425506	xin actin-binding repeat containing 2 [Source:MGI Symbol;Acc:MGI:2685198]	Xirp2	5262.09	4130.3	4382.44	10035.2	4859.14	5789.68
ENSMUSG00000035790	0.52194	3.2644	5.03147	0.0248907	0.146241	centrosomal protein 19 [Source:MGI Symbol;Acc:MGI:1914244]	Cep19	6.81297	7.64546	8.81526	9.86402	12.6373	10.9513
ENSMUSG00000050721	0.521865	4.7695	7.40237	0.0065138	0.0734341	pleckstrin homology domain containing, family O member 2 [Source:MGI Symbol;Acc:MGI:2143132]	Plekho2	20.9808	22.1217	22.9992	40.9559	28.4182	27.2457
ENSMUSG00000045404	0.521562	1.12936	1.15685	0.282119	0.538618	potassium channel, subfamily K, member 13 [Source:MGI Symbol;Acc:MGI:2384976]	Kcnk13	0.851621	2.06803	2.18725	2.88422	2.07478	2.16376
ENSMUSG00000027833	0.521136	0.509033	0.531902	0.465808	0.694506	short stature homeobox 2 [Source:MGI Symbol;Acc:MGI:1201673]	Shox2	1.1613	2.06803	0.265121	2.13432	0.817338	1.28059
ENSMUSG00000030790	0.520946	3.02765	3.0387	0.081301	0.27334	adrenomedullin [Source:MGI Symbol;Acc:MGI:108058]	Adm	4.72263	7.83347	7.0257	11.6522	6.91594	9.71483
ENSMUSG00000071847	0.520855	2.28259	3.12731	0.0769906	0.265805	adenomatosis polyposis coli down-regulated 1 [Source:MGI Symbol;Acc:MGI:3513977]	Apcdd1	4.2581	4.63741	2.71749	7.15286	5.97286	3.7093
ENSMUSG00000038587	0.520693	6.36117	7.6585	0.00565054	0.0683595	A kinase (PRKA) anchor protein (gravin) 12 [Source:MGI Symbol;Acc:MGI:1932576]	Akap12	67.2781	68.3705	62.9661	133.366	77.7729	82.5319
ENSMUSG00000051034	0.520648	3.06387	4.23736	0.0395435	0.187027	zinc finger protein 11 [Source:MGI Symbol;Acc:MGI:99156]	Zfp11	7.81943	7.01879	4.97101	14.7672	8.42487	6.40295
ENSMUSG00000035824	0.520636	3.44396	4.37587	0.0364513	0.179341	thymidine kinase 2, mitochondrial [Source:MGI Symbol;Acc:MGI:1913266]	Tk2	7.43233	8.64815	10.2071	15.6325	12.0086	10.4655
ENSMUSG00000037251	0.520263	3.96722	6.00496	0.0142658	0.111225	protein-O-mannose kinase [Source:MGI Symbol;Acc:MGI:1921903]	Pomk	11.9227	14.5389	11.4002	23.4198	16.4096	15.2346
ENSMUSG00000000386	0.520116	0.823666	1.10796	0.292527	0.546877	MX dynamin-like GTPase 1 [Source:MGI Symbol;Acc:MGI:97243]	Mx1	0.619361	0.752013	2.51865	0.807581	1.19457	3.57682
ENSMUSG00000023206	0.51997	4.56354	8.37593	0.00380224	0.0564925	interleukin 15 receptor, alpha chain [Source:MGI Symbol;Acc:MGI:104644]	Il15ra	20.826	18.2363	18.6247	31.6687	28.8583	22.8298
ENSMUSG00000021567	0.519427	2.07153	2.7725	0.0958964	0.301303	naked cuticle 2 homolog (Drosophila) [Source:MGI Symbol;Acc:MGI:1919543]	Nkd2	3.871	2.94538	3.04889	6.40296	3.33222	4.72494
ENSMUSG00000050666	0.519316	3.37944	5.5248	0.0187488	0.128021	V-set and transmembrane domain containing 4 [Source:MGI Symbol;Acc:MGI:2444633]	Vstm4	8.12911	9.40016	7.75478	12.979	12.3229	10.9513
ENSMUSG00000027498	0.519238	4.54054	7.90064	0.00494174	0.0637244	cleavage stimulation factor, 3' pre-RNA, subunit 1 [Source:MGI Symbol;Acc:MGI:1914587]	Cstf1	15.2518	20.1163	21.6073	25.7272	23.8286	31.9706
ENSMUSG00000039835	0.519207	5.02902	7.555	0.00598438	0.0699441	NHS-like 1 [Source:MGI Symbol;Acc:MGI:106390]	Nhsl1	37.9358	34.9686	10.2734	53.5887	38.5406	20.0037
ENSMUSG00000044067	0.519069	6.26732	9.21995	0.00239392	0.0453523	G protein-coupled receptor 22 [Source:MGI Symbol;Acc:MGI:1920260]	Gpr22	62.0135	66.3025	60.0498	109.773	86.6378	76.4822
ENSMUSG00000042129	0.518349	4.97049	7.21308	0.00723742	0.077598	Ras association (RalGDS/AF-6) domain family member 4 [Source:MGI Symbol;Acc:MGI:2386853]	Rassf4	25.5486	24.7538	25.1202	50.8199	27.2865	33.6045
ENSMUSG00000058881	0.518117	5.10424	9.55277	0.00199648	0.0415864	zinc finger protein 516 [Source:MGI Symbol;Acc:MGI:2443957]	Zfp516	32.2842	25.5058	25.7167	54.5694	33.5737	33.8694
ENSMUSG00000036362	0.517884	1.28977	1.53452	0.215435	0.464458	purinergic receptor P2Y, G-protein coupled 13 [Source:MGI Symbol;Acc:MGI:1921441]	P2ry13	1.62582	1.88003	1.9884	2.82653	1.69755	3.62098
ENSMUSG00000041483	0.517884	5.07938	7.2427	0.00711898	0.076994	zinc finger protein 281 [Source:MGI Symbol;Acc:MGI:3029290]	Zfp281	22.8389	26.6338	33.1401	46.4359	30.0529	42.6569
ENSMUSG00000020776	0.517748	4.60209	8.22649	0.00412834	0.0591509	Fas (TNFRSF6) binding factor 1 [Source:MGI Symbol;Acc:MGI:1922033]	Fbf1	22.0647	19.3017	17.7631	35.5335	22.8226	27.2898
ENSMUSG00000037447	0.51746	4.97491	6.78327	0.00920163	0.0882575	AT rich interactive domain 5A (MRF1-like) [Source:MGI Symbol;Acc:MGI:2443039]	Arid5a	22.3744	26.1324	27.9702	47.0127	30.2415	33.9577
ENSMUSG00000002307	0.51729	4.45344	8.58081	0.00339724	0.0540834	Fas death domain-associated protein [Source:MGI Symbol;Acc:MGI:1197015]	Daxx	16.3356	17.2963	20.0829	24.9773	24.7716	26.9807
ENSMUSG00000001334	0.516997	8.24932	9.09176	0.00256763	0.0467673	fibronectin type III domain containing 5 [Source:MGI Symbol;Acc:MGI:1917614]	Fndc5	221.421	255.998	273.008	387.293	314.864	372.122
ENSMUSG00000050663	0.51677	-1.21106	0.251728	0.615861	0.799307	TRH-degrading enzyme [Source:MGI Symbol;Acc:MGI:2384311]	Trhde	0.464521	0	0.397681	0.634528	0.188616	0.220792
ENSMUSG00000034525	0.516647	7.03521	6.71097	0.00958218	0.0903857	interactor of little elongation complex ELL subunit 1 [Source:MGI Symbol;Acc:MGI:2385865]	Ice1	116.672	103.276	92.7922	238.986	112.415	121.921
ENSMUSG00000034071	0.516401	1.64217	2.04991	0.152215	0.383966	zinc fingr protein 551 [Source:MGI Symbol;Acc:MGI:3588205]	Zfp551	2.16776	3.38406	1.78956	4.38401	4.08669	2.16376
ENSMUSG00000030930	0.516306	4.2681	7.17369	0.00739805	0.0783272	carbohydrate (N-acetylgalactosamine 4-sulfate 6-O) sulfotransferase 15 [Source:MGI Symbol;Acc:MGI:1924840]	Chst15	17.1873	16.0429	13.3223	30.6304	20.6849	16.9126
ENSMUSG00000071632	0.516276	4.08907	6.33486	0.0118388	0.101712	RIKEN cDNA 2510002D24 gene [Source:MGI Symbol;Acc:MGI:1919557]	2510002D24Rik	12.155	15.4789	13.8526	23.4775	18.1701	18.0166
ENSMUSG00000058396	0.515957	2.03151	1.97989	0.159402	0.393639	G protein-coupled receptor 182 [Source:MGI Symbol;Acc:MGI:109545]	Gpr182	1.78066	6.0161	2.51865	4.32632	4.84116	4.10672
ENSMUSG00000057329	0.515656	4.26088	7.29306	0.00692215	0.0756414	B cell leukemia/lymphoma 2 [Source:MGI Symbol;Acc:MGI:88138]	Bcl2	16.026	15.7296	14.913	26.4771	18.4215	22.4766
ENSMUSG00000066235	0.515601	3.92135	6.11766	0.0133838	0.107706	protein O-linked mannose beta 1,4-N-acetylglucosaminyltransferase 2 [Source:MGI Symbol;Acc:MGI:2143424]	Pomgnt2	11.4582	13.6616	11.7316	21.1125	15.2779	16.6918
ENSMUSG00000046805	0.515577	5.38146	8.56482	0.00342721	0.0542275	macrophage expressed gene 1 [Source:MGI Symbol;Acc:MGI:1333743]	Mpeg1	30.5809	30.0805	40.7623	53.9348	34.0138	59.5696
ENSMUSG00000036553	0.515413	4.47744	7.51227	0.006128	0.0709684	SH3 domain and tetratricopeptide repeats 1 [Source:MGI Symbol;Acc:MGI:2678949]	Sh3tc1	20.7486	18.3616	15.1119	34.0338	20.6849	23.8013
ENSMUSG00000025645	0.515214	3.36431	3.74793	0.0528729	0.21798	coiled-coil domain containing 51 [Source:MGI Symbol;Acc:MGI:1913908]	Ccdc51	7.35491	9.27482	7.88734	17.1322	9.68231	9.53819
ENSMUSG00000027007	0.514863	6.00138	9.74647	0.00179667	0.0396297	sperm specific antigen 2 [Source:MGI Symbol;Acc:MGI:1917849]	Ssfa2	60.8522	48.1915	47.1915	100.313	66.7074	60.2761
ENSMUSG00000044092	0.514217	0.968264	1.17414	0.278553	0.535054	RIKEN cDNA C130050O18 gene [Source:MGI Symbol;Acc:MGI:2442694]	C130050O18Rik	1.62582	1.25335	1.45816	3.51874	1.82329	1.32475
ENSMUSG00000050394	0.513828	0.633671	1.04277	0.307177	0.56066	armadillo repeat containing, X-linked 6 [Source:MGI Symbol;Acc:MGI:2147993]	Armcx6	1.70324	0.940016	0.927922	2.13432	1.50893	1.36891
ENSMUSG00000038763	0.513681	8.641	8.91012	0.00283594	0.0493093	alpha-kinase 3 [Source:MGI Symbol;Acc:MGI:2151224]	Alpk3	383.771	342.354	247.954	665.158	388.739	366.426
ENSMUSG00000001333	0.513064	5.15806	9.30229	0.00228867	0.0444076	syncoilin [Source:MGI Symbol;Acc:MGI:1916078]	Sync	33.8326	30.3938	22.5353	57.3382	40.3011	29.0562
ENSMUSG00000027254	0.512905	7.4759	8.42548	0.0037	0.0559139	microtubule-associated protein 1 A [Source:MGI Symbol;Acc:MGI:1306776]	Map1a	238.299	174.718	17.6968	401.368	210.37	25.3469
ENSMUSG00000044086	0.512896	6.02512	9.48511	0.00207146	0.0422361	leiomodin 3 (fetal) [Source:MGI Symbol;Acc:MGI:2444169]	Lmod3	53.7295	50.4475	55.5428	86.9303	62.1177	80.9422
ENSMUSG00000045598	0.512681	3.93159	5.94948	0.0147216	0.113194	zinc finger protein 553 [Source:MGI Symbol;Acc:MGI:2384725]	Zfp553	15.3292	12.4709	9.87574	16.9015	17.6671	18.414
ENSMUSG00000021276	0.512643	4.21568	7.67372	0.0056031	0.0680846	cyclin-dependent kinase 2 interacting protein [Source:MGI Symbol;Acc:MGI:1914486]	Cinp	13.0066	14.6642	17.9619	20.7664	20.3706	23.6689
ENSMUSG00000070287	0.512582	2.41439	3.2536	0.0712667	0.25442	solute carrier family 35, member G2 [Source:MGI Symbol;Acc:MGI:2685365]	Slc35g2	4.33552	3.82273	4.63961	6.92212	6.03573	5.38731
ENSMUSG00000005774	0.512468	3.31156	4.22911	0.0397363	0.187201	regulatory factor X, 5 (influences HLA class II expression) [Source:MGI Symbol;Acc:MGI:1858421]	Rfx5	7.27749	8.52281	8.08618	14.3057	8.8021	11.5695
ENSMUSG00000031925	0.511755	4.16459	6.78973	0.0091684	0.0880677	mastermind like 2 (Drosophila) [Source:MGI Symbol;Acc:MGI:2389460]	Maml2	17.4195	15.9176	10.0746	30.515	19.0503	13.8657
ENSMUSG00000032322	0.511449	1.96912	2.57233	0.108748	0.320954	proline-serine-threonine phosphatase-interacting protein 1 [Source:MGI Symbol;Acc:MGI:1321396]	Pstpip1	2.55486	2.75738	3.84425	4.0379	3.20648	6.00553
ENSMUSG00000055435	0.51103	4.93542	8.22536	0.0041309	0.0591509	avian musculoaponeurotic fibrosarcoma oncogene homolog [Source:MGI Symbol;Acc:MGI:96909]	Maf	23.8454	23.1871	27.7051	43.0325	28.1039	36.6956
ENSMUSG00000045287	0.510994	3.1424	3.58154	0.058425	0.230221	reticulon 4 receptor-like 1 [Source:MGI Symbol;Acc:MGI:2661375]	Rtn4rl1	6.03877	10.5908	5.03729	12.979	10.5625	6.93285
ENSMUSG00000041852	0.510991	7.20795	8.21238	0.00416055	0.0593808	transcription factor 20 [Source:MGI Symbol;Acc:MGI:108399]	Tcf20	121.395	124.207	116.984	214.99	147.435	161.09
ENSMUSG00000030322	0.510881	2.42278	2.55706	0.109803	0.322275	methyl-CpG binding domain protein 4 [Source:MGI Symbol;Acc:MGI:1333850]	Mbd4	4.56779	4.44941	3.44657	9.5756	3.8352	5.38731
ENSMUSG00000049872	0.510837	1.75451	2.10437	0.146879	0.376687	family with sequence similarity 26, member E [Source:MGI Symbol;Acc:MGI:2143897]	Fam26e	2.47744	2.88272	2.51865	5.01854	3.01786	3.44435
ENSMUSG00000039148	0.510799	5.8623	9.16237	0.00247042	0.0461733	squamous cell carcinoma antigen recognized by T cells 1 [Source:MGI Symbol;Acc:MGI:1309453]	Sart1	50.7102	40.922	51.566	81.7964	63.3751	59.7903
ENSMUSG00000027091	0.510679	5.72445	9.35261	0.00222668	0.0438492	zinc finger CCCH-type containing 15 [Source:MGI Symbol;Acc:MGI:1919747]	Zc3h15	41.4197	36.2846	53.3555	66.9715	54.8874	63.323
ENSMUSG00000075000	0.510479	3.46181	3.56246	0.0591001	0.231275	nuclear receptor binding factor 2 [Source:MGI Symbol;Acc:MGI:1354950]	Nrbf2	8.12911	7.70813	10.2734	19.4973	9.80806	9.80314
ENSMUSG00000074622	0.510269	4.47144	6.14797	0.0131563	0.10696	v-maf musculoaponeurotic fibrosarcoma oncogene family, protein B (avian) [Source:MGI Symbol;Acc:MGI:104555]	Mafb	18.0389	20.2417	15.3107	36.4565	22.2567	19.9154
ENSMUSG00000050556	0.510253	6.41076	8.47704	0.00359658	0.0549892	potassium voltage gated channel, Shab-related subfamily, member 1 [Source:MGI Symbol;Acc:MGI:96666]	Kcnb1	76.4136	75.2013	56.7358	132.847	85.8205	82.576
ENSMUSG00000074158	0.510117	3.07368	3.61255	0.0573451	0.228023	zinc finger protein 976 [Source:MGI Symbol;Acc:MGI:3036263]	Zfp976	7.43233	5.70276	6.56174	15.8055	6.97881	7.1978
ENSMUSG00000095788	0.509951	0.301953	0.781588	0.376656	0.621217	signal-regulatory protein beta 1A [Source:MGI Symbol;Acc:MGI:2444824]	Sirpb1a	0.851621	0.940016	0.861642	0.922949	1.25744	1.67802
ENSMUSG00000079065	0.509917	4.94234	4.90789	0.0267342	0.151899	cDNA sequence BC005561 [Source:MGI Symbol;Acc:MGI:3040669]	BC005561	22.8389	22.7484	27.2411	55.8961	23.5771	31.1758
ENSMUSG00000037992	0.509902	4.21833	6.88798	0.00867774	0.0852292	retinoic acid receptor, alpha [Source:MGI Symbol;Acc:MGI:97856]	Rara	15.7937	17.4843	11.7979	27.6308	24.2687	13.954
ENSMUSG00000043881	0.509774	4.14475	6.30717	0.0120251	0.102638	kelch repeat and BTB (POZ) domain containing 7 [Source:MGI Symbol;Acc:MGI:2685141]	Kbtbd7	12.0775	13.4109	17.8294	23.0737	16.2839	22.3883
ENSMUSG00000031540	0.509743	6.82373	8.37582	0.00380246	0.0564925	K(lysine) acetyltransferase 6A [Source:MGI Symbol;Acc:MGI:2442415]	Kat6a	114.969	99.015	62.4359	196.992	115.056	90.4362
ENSMUSG00000045107	0.509431	2.95135	4.22987	0.0397185	0.187201	SAYSVFN motif domain containing 1 [Source:MGI Symbol;Acc:MGI:1914759]	Saysd1	7.04523	5.8281	5.83265	10.9023	8.8021	7.1978
ENSMUSG00000071252	0.509175	2.97061	3.43222	0.0639361	0.241062	RIKEN cDNA 2210408I21 gene [Source:MGI Symbol;Acc:MGI:1919621]	2210408I21Rik	5.49683	6.0161	7.3571	11.5946	8.17338	7.50691
ENSMUSG00000039236	0.50904	1.24378	1.24301	0.264892	0.519709	interferon-stimulated protein [Source:MGI Symbol;Acc:MGI:1928895]	Isg20	1.23872	1.88003	2.38609	3.28801	2.76638	1.85465
ENSMUSG00000046688	0.509033	1.8309	2.41825	0.119929	0.338717	TRAF-interacting protein with forkhead-associated domain [Source:MGI Symbol;Acc:MGI:2182965]	Tifa	2.7097	2.50671	3.18145	3.63411	3.58371	4.7691
ENSMUSG00000066800	0.508774	3.48916	4.85166	0.0276196	0.15458	ribonuclease L (2', 5'-oligoisoadenylate synthetase-dependent) [Source:MGI Symbol;Acc:MGI:1098272]	Rnasel	9.90977	9.83883	7.22454	18.8051	11.0026	9.75899
ENSMUSG00000030811	0.50832	3.29764	4.85264	0.0276038	0.154576	F-box and leucine-rich repeat protein 19 [Source:MGI Symbol;Acc:MGI:3039600]	Fbxl19	9.29041	6.89345	7.55594	14.3634	8.11051	11.8344
ENSMUSG00000023328	0.508094	1.59923	1.56233	0.211325	0.459396	acetylcholinesterase [Source:MGI Symbol;Acc:MGI:87876]	Ache	3.01938	3.57206	0.994202	3.51874	3.33222	2.95861
ENSMUSG00000055341	0.508052	1.66517	1.82794	0.176371	0.417114	zinc finger protein 457 [Source:MGI Symbol;Acc:MGI:2664334]	Zfp457	3.56132	3.38406	0.729082	6.11454	3.26935	1.36891
ENSMUSG00000020381	0.507796	1.05318	1.25343	0.262898	0.517423	MRN complex interacting protein [Source:MGI Symbol;Acc:MGI:1915317]	Mrnip	1.85808	1.44136	1.45816	2.30737	3.20648	1.50138
ENSMUSG00000044364	0.507551	1.78717	2.20714	0.137373	0.363903	transmembrane protein 74B [Source:MGI Symbol;Acc:MGI:1918629]	Tmem74b	3.63874	2.94538	1.72328	5.13391	3.26935	3.22356
ENSMUSG00000038895	0.507075	2.83041	3.9987	0.0455353	0.200897	zinc finger protein 653 [Source:MGI Symbol;Acc:MGI:2442362]	Zfp653	5.41941	5.51476	6.23033	7.55665	7.35604	9.58235
ENSMUSG00000051456	0.506937	3.21912	2.78875	0.0949282	0.299558	heat shock protein 3 [Source:MGI Symbol;Acc:MGI:1928479]	Hspb3	7.35491	8.96148	5.70009	16.7861	6.79019	9.3174
ENSMUSG00000031853	0.506921	2.17041	2.76546	0.0963191	0.301907	mitogen-activated protein kinase kinase kinase 21 [Source:MGI Symbol;Acc:MGI:2385307]	Map3k21	4.2581	4.19874	2.25353	7.49896	5.09265	3.00276
ENSMUSG00000028560	0.506741	4.20468	6.93234	0.00846506	0.0839586	ubiquitin specific peptidase 1 [Source:MGI Symbol;Acc:MGI:2385198]	Usp1	12.6195	14.3509	18.4259	22.1508	18.673	23.3597
ENSMUSG00000000489	0.506676	5.50437	9.4002	0.00216962	0.043137	platelet derived growth factor, B polypeptide [Source:MGI Symbol;Acc:MGI:97528]	Pdgfb	41.4197	35.8459	33.9354	68.3559	45.8967	46.013
ENSMUSG00000067629	0.506097	2.40596	3.19722	0.0737634	0.259101	synaptic Ras GTPase activating protein 1 homolog (rat) [Source:MGI Symbol;Acc:MGI:3039785]	Syngap1	6.96781	3.44672	2.45237	9.86402	5.21839	3.26771
ENSMUSG00000040624	0.506009	4.65994	6.56358	0.0104087	0.094573	pleckstrin homology domain containing, family G (with RhoGef domain) member 1 [Source:MGI Symbol;Acc:MGI:2676551]	Plekhg1	21.2905	20.1163	19.6189	41.475	22.3196	25.9209
ENSMUSG00000027508	0.505844	3.7606	5.71079	0.016861	0.12138	phosphoprotein associated with glycosphingolipid microdomains 1 [Source:MGI Symbol;Acc:MGI:2443160]	Pag1	10.3743	11.9069	10.7374	19.0935	14.8378	13.4683
ENSMUSG00000044948	0.5057	5.20549	6.87991	0.00871701	0.0854075	cilia and flagella associated protein 43 [Source:MGI Symbol;Acc:MGI:1289258]	Cfap43	28.8777	37.0366	25.319	51.2237	36.7802	41.1555
ENSMUSG00000001151	0.505494	7.89189	8.02889	0.0046037	0.0618008	pericentrin (kendrin) [Source:MGI Symbol;Acc:MGI:102722]	Pcnt	218.015	209.624	154.234	382.793	241.303	218.275
ENSMUSG00000080268	0.505439	3.64773	5.81446	0.0158949	0.117261	breast cancer metastasis-suppressor 1 [Source:MGI Symbol;Acc:MGI:2388804]	Brms1	8.90331	9.65083	12.1293	14.9979	12.6373	15.8528
ENSMUSG00000051339	0.505407	6.36353	7.13742	0.00754915	0.079064	RIKEN cDNA 2900026A02 gene [Source:MGI Symbol;Acc:MGI:1920194]	2900026A02Rik	86.5557	80.716	36.7855	145.826	81.7338	61.6892
ENSMUSG00000029009	0.505277	4.78549	2.94071	0.0863726	0.283149	5,10-methylenetetrahydrofolate reductase [Source:MGI Symbol;Acc:MGI:106639]	Mthfr	14.0905	29.6418	23.8609	45.2822	28.9841	22.6532
ENSMUSG00000004891	0.504828	6.96186	7.57976	0.00590273	0.0694965	nestin [Source:MGI Symbol;Acc:MGI:101784]	Nes	120.698	83.2227	96.4376	222.95	101.224	122.539
ENSMUSG00000039158	0.504798	4.22016	6.3053	0.0120378	0.102638	AT-hook transcription factor [Source:MGI Symbol;Acc:MGI:2140340]	Akna	15.1743	16.5443	13.7863	27.1693	18.1072	20.092
ENSMUSG00000032475	0.504732	5.38854	7.96353	0.00477293	0.0629718	non-catalytic region of tyrosine kinase adaptor protein 1 [Source:MGI Symbol;Acc:MGI:109601]	Nck1	33.0584	30.2058	39.7018	60.9147	40.9298	45.5714
ENSMUSG00000038708	0.504719	9.80474	9.00394	0.00269398	0.0480632	golgi autoantigen, golgin subfamily a, 4 [Source:MGI Symbol;Acc:MGI:1859646]	Golga4	761.814	671.359	733.655	1483.93	748.745	965.786
ENSMUSG00000032243	0.504319	1.81545	2.189	0.138999	0.366211	integrin alpha 11 [Source:MGI Symbol;Acc:MGI:2442114]	Itga11	2.55486	0.940016	4.83845	3.63411	1.44606	6.53543
ENSMUSG00000036062	0.504199	2.53108	2.91029	0.0880163	0.286222	PHD finger protein 24 [Source:MGI Symbol;Acc:MGI:2140712]	Phf24	3.79358	4.95075	5.16985	7.84507	6.47583	5.56395
ENSMUSG00000055305	0.504182	3.06613	4.18729	0.0407282	0.189227	zinc finger protein 93 [Source:MGI Symbol;Acc:MGI:107611]	Zfp93	7.27749	6.32944	6.62802	12.2291	9.43082	7.55107
ENSMUSG00000038188	0.503547	4.53585	7.40445	0.00650628	0.0734341	scavenger receptor class F, member 1 [Source:MGI Symbol;Acc:MGI:2449455]	Scarf1	24.6196	17.0456	14.5154	41.4173	20.1191	20.6661
ENSMUSG00000048732	0.50346	4.19257	6.02905	0.0140723	0.110231	kelch-like 11 [Source:MGI Symbol;Acc:MGI:2388648]	Klhl11	17.2647	14.2882	12.1955	32.9954	17.1012	15.058
ENSMUSG00000036214	0.503227	2.94439	2.00072	0.157225	0.39081	zinc ribbon domain containing 1, antisense [Source:MGI Symbol;Acc:MGI:1923666]	Znrd1as	8.90331	3.00805	6.42918	15.344	7.92189	4.01841
ENSMUSG00000028980	0.503192	6.36244	7.96566	0.00476731	0.062965	hexose-6-phosphate dehydrogenase (glucose 1-dehydrogenase) [Source:MGI Symbol;Acc:MGI:2140356]	H6pd	70.6845	74.9506	55.3439	130.713	90.6617	70.4767
ENSMUSG00000056888	0.503086	1.08477	1.03768	0.308362	0.561634	GLI pathogenesis-related 1 (glioma) [Source:MGI Symbol;Acc:MGI:1920940]	Glipr1	1.5484	0.501342	3.24773	1.61516	1.76042	3.13524
ENSMUSG00000026824	0.503084	5.88371	5.63868	0.0175684	0.123742	potassium inwardly-rectifying channel, subfamily J, member 3 [Source:MGI Symbol;Acc:MGI:104742]	Kcnj3	45.6779	51.6382	44.1426	102.563	64.3182	45.0856
ENSMUSG00000029587	0.502483	4.5896	7.41347	0.00647373	0.0733726	zinc finger protein 12 [Source:MGI Symbol;Acc:MGI:99157]	Zfp12	19.897	19.7403	19.2875	34.0914	22.8226	27.6431
ENSMUSG00000050373	0.502315	4.85217	8.20862	0.00416919	0.059381	sorting nexin family member 21 [Source:MGI Symbol;Acc:MGI:1917729]	Snx21	21.6776	24.8791	24.6562	37.4371	32.5678	31.1316
ENSMUSG00000033099	0.502252	3.50377	3.68928	0.0547631	0.222787	nucleolar protein 12 [Source:MGI Symbol;Acc:MGI:2146285]	Nol12	8.05169	9.33749	9.74318	18.8628	11.5685	9.62651
ENSMUSG00000056214	0.50221	2.34733	2.49309	0.114347	0.329052	par-6 family cell polarity regulator gamma [Source:MGI Symbol;Acc:MGI:2135606]	Pard6g	4.10326	4.57474	3.38029	7.90275	4.02382	5.6081
ENSMUSG00000045969	0.502164	4.61263	6.87869	0.00872293	0.0854075	inhibitor of growth family, member 1 [Source:MGI Symbol;Acc:MGI:1349481]	Ing1	20.5937	19.1763	19.6852	38.5908	23.6399	24.1988
ENSMUSG00000020484	0.502157	6.16814	6.13175	0.0132776	0.107186	X-box binding protein 1 [Source:MGI Symbol;Acc:MGI:98970]	Xbp1	34.7616	82.4081	66.6778	75.0473	89.8443	81.6487
ENSMUSG00000021365	0.501562	5.90211	7.91146	0.00491225	0.06366	neural precursor cell expressed, developmentally down-regulated gene 9 [Source:MGI Symbol;Acc:MGI:97302]	Nedd9	38.3229	38.7913	72.1791	71.7593	48.4116	88.14
ENSMUSG00000062488	0.501531	2.67785	3.08478	0.0790278	0.269852	interferon-induced protein with tetratricopeptide repeats 3B [Source:MGI Symbol;Acc:MGI:3698419]	Ifit3b	3.871	4.0734	7.82106	7.44128	5.90998	8.2576
ENSMUSG00000051306	0.501377	4.16196	6.91738	0.00853619	0.0844721	ubiquitin specific peptidase 42 [Source:MGI Symbol;Acc:MGI:1924050]	Usp42	16.5679	14.2256	12.8584	27.7462	17.9814	17.1776
ENSMUSG00000075419	0.501251	4.86197	9.08683	0.00257457	0.0467851	dolichol kinase [Source:MGI Symbol;Acc:MGI:2677836]	Dolk	22.2196	24.4404	25.1865	34.0338	32.945	34.6643
ENSMUSG00000019866	0.50117	3.95261	5.14195	0.0233544	0.142254	crystallin beta-gamma domain containing 1 [Source:MGI Symbol;Acc:MGI:109544]	Crybg1	14.0905	13.4736	9.94202	25.3811	13.0145	16.0736
ENSMUSG00000074971	0.500921	4.71168	5.63661	0.0175892	0.123742	fin bud initiation factor homolog (zebrafish) [Source:MGI Symbol;Acc:MGI:1914856]	Fibin	20.9034	21.0564	21.0771	44.7054	23.5142	25.0378
ENSMUSG00000030446	0.500311	1.81601	1.44996	0.228534	0.480609	zinc finger protein 273 [Source:MGI Symbol;Acc:MGI:3036278]	Zfp273	1.23872	3.38406	3.97681	4.44169	3.01786	4.06256
ENSMUSG00000067586	0.499813	4.90884	7.59162	0.00586401	0.0694965	sphingosine-1-phosphate receptor 3 [Source:MGI Symbol;Acc:MGI:1339365]	S1pr3	24.0776	27.9498	21.8725	43.2632	32.6307	29.5419
ENSMUSG00000050919	0.499791	4.16434	5.88006	0.0153133	0.115109	zinc finger protein 366 [Source:MGI Symbol;Acc:MGI:2178429]	Zfp366	16.8776	16.5443	9.6769	32.1302	19.6161	12.0111
ENSMUSG00000021453	0.499744	4.55286	5.87394	0.0153667	0.115361	growth arrest and DNA-damage-inducible 45 gamma [Source:MGI Symbol;Acc:MGI:1346325]	Gadd45g	13.8582	21.5577	23.0655	28.6691	25.5261	27.1132
ENSMUSG00000050064	0.499526	5.9812	6.58986	0.0102561	0.0939592	zinc finger protein 697 [Source:MGI Symbol;Acc:MGI:2139736]	Zfp697	19.1228	79.6507	66.015	38.3024	82.6769	91.9818
ENSMUSG00000026510	0.499459	3.99229	6.61144	0.0101326	0.0932939	transformation related protein 53 binding protein 2 [Source:MGI Symbol;Acc:MGI:2138319]	Trp53bp2	15.0195	15.4163	8.88154	23.3622	18.6102	13.4241
ENSMUSG00000050530	0.499236	4.87221	8.57491	0.00340826	0.054193	family with sequence similarity 171, member A1 [Source:MGI Symbol;Acc:MGI:2442917]	Fam171a1	29.6519	28.2005	15.377	41.7058	34.9569	25.0819
ENSMUSG00000021959	0.499209	6.34808	7.81358	0.00518552	0.0654534	large tumor suppressor 2 [Source:MGI Symbol;Acc:MGI:1354386]	Lats2	70.5297	56.8396	73.6373	120.099	87.0151	79.7941
ENSMUSG00000020682	0.4992	3.21137	3.20224	0.0735376	0.258759	matrix metallopeptidase 28 (epilysin) [Source:MGI Symbol;Acc:MGI:2153062]	Mmp28	7.04523	9.65083	5.96521	11.1331	8.29913	12.4085
ENSMUSG00000071637	0.498982	5.49548	8.71903	0.00314905	0.0517719	CCAAT/enhancer binding protein (C/EBP), delta [Source:MGI Symbol;Acc:MGI:103573]	Cebpd	29.8842	44.3061	38.1774	48.6856	52.121	56.4343
ENSMUSG00000057133	0.498937	8.15859	8.48476	0.00358133	0.0548802	chromodomain helicase DNA binding protein 6 [Source:MGI Symbol;Acc:MGI:1918639]	Chd6	260.906	278.934	167.291	439.151	331.022	236.379
ENSMUSG00000048347	0.498759	1.97624	1.5011	0.220503	0.470679	protocadherin beta 18 [Source:MGI Symbol;Acc:MGI:2136756]	Pcdhb18	2.3226	2.88272	3.91053	6.9798	4.02382	2.69366
ENSMUSG00000020308	0.498391	3.6043	4.62506	0.0315081	0.166067	tubulin polyglutamylase complex subunit 1 [Source:MGI Symbol;Acc:MGI:106618]	Tpgs1	9.44525	9.9015	10.0746	18.8051	12.8888	10.9954
ENSMUSG00000074476	0.498211	2.02499	1.93742	0.163949	0.400159	SPC24, NDC80 kinetochore complex component, homolog (S. cerevisiae) [Source:MGI Symbol;Acc:MGI:1914879]	Spc24	2.47744	3.44672	3.57913	5.8838	2.82925	5.16652
ENSMUSG00000064115	0.498061	-0.0538036	0.33756	0.561241	0.763425	cell adhesion molecule 2 [Source:MGI Symbol;Acc:MGI:2442722]	Cadm2	0	1.31602	1.12676	0.634528	1.38319	0.574058
ENSMUSG00000043183	0.498058	2.29467	1.29326	0.255447	0.509581	SUMO-interacting motifs containing 1 [Source:MGI Symbol;Acc:MGI:2442599]	Simc1	2.09034	4.44941	4.90473	9.05644	3.64659	4.32751
ENSMUSG00000050014	0.497468	1.66221	1.60353	0.205403	0.452908	apolipoprotein L 10B [Source:MGI Symbol;Acc:MGI:3043522]	Apol10b	2.24518	2.31871	2.58493	5.42233	1.88616	3.57682
ENSMUSG00000026048	0.497458	5.12931	6.50623	0.0107497	0.0967991	excision repair cross-complementing rodent repair deficiency, complementation group 5 [Source:MGI Symbol;Acc:MGI:103582]	Ercc5	27.097	30.1432	27.9702	55.3193	37.5976	30.9991
ENSMUSG00000030598	0.49723	0.393274	0.753391	0.385405	0.628995	F-box protein 17 [Source:MGI Symbol;Acc:MGI:1354707]	Fbxo17	0.696781	1.37869	0.861642	1.26906	1.19457	1.5897
ENSMUSG00000042229	0.497022	4.01525	6.55897	0.0104357	0.0947528	RAB interacting factor [Source:MGI Symbol;Acc:MGI:2138605]	Rabif	12.0775	14.4136	13.3223	19.3819	17.1641	19.6504
ENSMUSG00000026842	0.496459	6.63685	8.16183	0.00427812	0.0596296	c-abl oncogene 1, non-receptor tyrosine kinase [Source:MGI Symbol;Acc:MGI:87859]	Abl1	86.8653	91.7455	67.4069	148.479	104.556	97.1483
ENSMUSG00000048109	0.496324	6.51298	6.00031	0.0143034	0.11135	RNA binding motif protein 15 [Source:MGI Symbol;Acc:MGI:2443205]	Rbm15	70.6845	72.6319	78.4757	150.498	77.8357	96.8392
ENSMUSG00000022178	0.495712	4.13255	6.95908	0.00833947	0.0831536	ajuba LIM protein [Source:MGI Symbol;Acc:MGI:1341886]	Ajuba	15.5614	13.6616	13.8526	24.2274	17.0384	19.9596
ENSMUSG00000051065	0.495603	3.96303	6.04735	0.0139272	0.109823	Mab-21 domain containing 2 [Source:MGI Symbol;Acc:MGI:1917028]	Mb21d2	12.2324	15.4163	10.8699	20.7087	17.3527	16.0736
ENSMUSG00000022658	0.495351	-0.0518159	0.559993	0.454263	0.685923	transgelin 3 [Source:MGI Symbol;Acc:MGI:1926784]	Tagln3	1.1613	0.81468	0.265121	1.15369	1.00595	0.706533
ENSMUSG00000050332	0.495224	4.85133	6.94819	0.00839041	0.0834075	APC membrane recruitment 1 [Source:MGI Symbol;Acc:MGI:1919595]	Amer1	22.7615	26.5711	21.6736	42.2249	29.487	29.5419
ENSMUSG00000039497	0.495172	4.75079	5.38605	0.0202984	0.133417	dermatan sulfate epimerase [Source:MGI Symbol;Acc:MGI:2443455]	Dse	15.7937	21.1817	30.3563	34.726	24.9602	33.4278
ENSMUSG00000035266	0.495134	2.91517	2.11471	0.14589	0.374985	helicase, POLQ-like [Source:MGI Symbol;Acc:MGI:2176740]	Helq	4.33552	9.40016	4.90473	11.5369	6.72732	7.37444
ENSMUSG00000039473	0.494396	6.23482	8.74144	0.00311058	0.0517719	ubinuclein 1 [Source:MGI Symbol;Acc:MGI:1891307]	Ubn1	70.1426	59.597	55.6091	116.003	74.0005	75.6432
ENSMUSG00000046441	0.494123	2.5944	3.29013	0.0696977	0.251565	cap methyltransferase 2 [Source:MGI Symbol;Acc:MGI:2384580]	Cmtr2	4.64521	4.57474	5.30241	6.22991	5.78424	8.65503
ENSMUSG00000026114	0.494004	1.51455	1.90354	0.167682	0.404898	cyclic nucleotide gated channel alpha 3 [Source:MGI Symbol;Acc:MGI:1341818]	Cnga3	2.78712	1.62936	2.31981	4.26864	2.2634	3.04692
ENSMUSG00000031722	0.493877	3.38259	4.89885	0.0268746	0.152429	haptoglobin [Source:MGI Symbol;Acc:MGI:96211]	Hp	7.04523	8.02147	10.6048	11.4792	11.0655	13.3358
ENSMUSG00000045954	0.493567	7.38237	7.86547	0.00503876	0.0644706	caveolae associated 2 [Source:MGI Symbol;Acc:MGI:99513]	Cavin2	129.059	129.346	154.366	221.969	151.836	213.417
ENSMUSG00000063268	0.493288	4.19852	4.96114	0.0259231	0.149924	poly (ADP-ribose) polymerase family, member 10 [Source:MGI Symbol;Acc:MGI:3712326]	Parp10	14.013	15.7923	14.7805	28.15	15.3408	21.0635
ENSMUSG00000017146	0.493178	2.10934	2.28526	0.130608	0.354144	breast cancer 1, early onset [Source:MGI Symbol;Acc:MGI:104537]	Brca1	3.871	1.31602	5.63381	5.5377	2.76638	5.8289
ENSMUSG00000002486	0.493177	2.92437	3.96537	0.0464452	0.202739	trichoplein, keratin filament binding [Source:MGI Symbol;Acc:MGI:1925082]	Tchp	6.96781	5.57743	5.96521	10.0371	7.35604	8.74334
ENSMUSG00000024142	0.493085	3.91112	5.18106	0.0228344	0.140722	MTOR associated protein, LST8 homolog (S. cerevisiae) [Source:MGI Symbol;Acc:MGI:1929514]	Mlst8	15.1743	9.83883	12.3281	17.3053	19.6161	15.2346
ENSMUSG00000027859	0.49288	2.37822	2.78179	0.0953416	0.300352	nerve growth factor [Source:MGI Symbol;Acc:MGI:97321]	Ngf	3.63874	4.63741	4.24193	6.92212	6.28722	4.63662
ENSMUSG00000038949	0.492865	7.03425	7.01638	0.00807674	0.0817499	consortin, connexin sorting protein [Source:MGI Symbol;Acc:MGI:2445141]	Cnst	103.124	125.837	96.3713	187.128	137.69	135.345
ENSMUSG00000020868	0.49274	4.44059	6.3434	0.0117819	0.101624	xylosyltransferase II [Source:MGI Symbol;Acc:MGI:2444797]	Xylt2	20.5937	18.0483	14.4491	34.8413	19.1131	22.3441
ENSMUSG00000044296	0.492713	1.70689	2.02225	0.155009	0.387508	zinc finger protein 879 [Source:MGI Symbol;Acc:MGI:3053099]	Zfp879	3.71616	3.32139	0.994202	5.01854	4.27531	1.67802
ENSMUSG00000040372	0.492537	0.580798	0.883038	0.347371	0.596402	G protein-coupled receptor 63 [Source:MGI Symbol;Acc:MGI:2135884]	Gpr63	1.31614	0.940016	1.12676	2.07664	1.69755	1.10396
ENSMUSG00000039232	0.492488	2.08598	2.02334	0.154898	0.387434	syntaxin 11 [Source:MGI Symbol;Acc:MGI:1921982]	Stx11	2.7097	3.8854	3.44657	6.46065	3.52084	4.50415
ENSMUSG00000044646	0.492484	2.18379	2.66953	0.102286	0.310508	zinc finger and BTB domain containing 7C [Source:MGI Symbol;Acc:MGI:2443302]	Zbtb7c	5.03231	3.32139	2.78377	5.99917	4.71541	4.63662
ENSMUSG00000025571	0.49246	6.96003	6.7758	0.00924022	0.0884334	trinucleotide repeat containing 6C [Source:MGI Symbol;Acc:MGI:2443265]	Tnrc6c	108.853	101.271	93.5213	206.625	115.685	120.155
ENSMUSG00000024298	0.492199	6.28514	6.9192	0.00852753	0.0844502	zinc finger protein 871 [Source:MGI Symbol;Acc:MGI:1921793]	Zfp871	59.9231	66.4905	65.6174	116.407	75.258	83.2384
ENSMUSG00000048921	0.49204	1.87269	2.29829	0.129517	0.353306	zinc finger protein 689 [Source:MGI Symbol;Acc:MGI:1918381]	Zfp689	2.86454	2.38137	3.44657	3.57643	3.45797	5.25484
ENSMUSG00000045064	0.491673	2.41727	3.04996	0.0807392	0.27264	zinc finger, C2HC-type containing 1C [Source:MGI Symbol;Acc:MGI:1919600]	Zc2hc1c	4.49036	3.82273	4.63961	6.74907	6.03573	5.47563
ENSMUSG00000048118	0.491653	5.33663	8.46299	0.00362445	0.055154	AT rich interactive domain 4A (RBP1-like) [Source:MGI Symbol;Acc:MGI:2444354]	Arid4a	37.4713	28.4511	33.1401	63.3951	35.2713	43.805
ENSMUSG00000038697	0.491599	4.63982	7.11552	0.00764196	0.0795993	TATA-box binding protein associated factor 5 like [Source:MGI Symbol;Acc:MGI:1919039]	Taf5l	21.0583	20.4923	19.6852	36.1681	23.5771	27.6431
ENSMUSG00000071350	0.491569	3.44412	4.90881	0.02672	0.151899	SET domain, bifurcated 2 [Source:MGI Symbol;Acc:MGI:2685139]	Setdb2	8.67105	9.33749	8.61642	13.4404	14.3977	10.0239
ENSMUSG00000034121	0.491217	1.71766	1.44339	0.229591	0.481735	Meckel syndrome, type 1 [Source:MGI Symbol;Acc:MGI:3584243]	Mks1	3.71616	2.38137	1.72328	3.23032	2.64063	5.07821
ENSMUSG00000066258	0.491141	3.95084	6.45026	0.0110936	0.0983411	tripartite motif-containing 12A [Source:MGI Symbol;Acc:MGI:1923931]	Trim12a	14.7098	10.9042	12.2618	23.7659	14.8378	15.4554
ENSMUSG00000046546	0.490877	5.12402	6.51511	0.0106962	0.0964498	family with sequence similarity 43, member A [Source:MGI Symbol;Acc:MGI:2676309]	Fam43a	26.9422	28.9525	29.4947	53.9925	35.6485	33.2954
ENSMUSG00000037060	0.490795	4.54405	7.21864	0.00721503	0.0774846	caveolae associated 3 [Source:MGI Symbol;Acc:MGI:1923422]	Cavin3	16.8002	21.4324	19.6189	28.5537	27.538	25.0819
ENSMUSG00000079242	0.490536	0.652901	0.960278	0.327117	0.579017	RIKEN cDNA C730034F03 gene [Source:MGI Symbol;Acc:MGI:2441921]	C730034F03Rik	1.5484	1.25335	0.795362	2.30737	1.88616	0.971483
ENSMUSG00000042589	0.490366	3.99377	5.60677	0.0178912	0.125161	cut-like homeobox 2 [Source:MGI Symbol;Acc:MGI:107321]	Cux2	15.1743	14.8523	9.41178	23.8236	15.6552	15.8087
ENSMUSG00000027082	0.489772	5.88822	4.80143	0.0284361	0.156761	tissue factor pathway inhibitor [Source:MGI Symbol;Acc:MGI:1095418]	Tfpi	38.3229	66.8038	40.2321	91.4297	76.6412	41.1114
ENSMUSG00000037674	0.489682	4.6477	7.50476	0.00615362	0.0711604	regulatory factor X, 7 [Source:MGI Symbol;Acc:MGI:2442675]	Rfx7	23.768	22.1844	15.7747	39.0523	27.0979	21.7259
ENSMUSG00000030301	0.489361	4.83495	6.92176	0.00851532	0.0843931	coiled-coil domain containing 91 [Source:MGI Symbol;Acc:MGI:1914265]	Ccdc91	18.7357	18.4243	34.532	34.4375	24.6459	39.3451
ENSMUSG00000020335	0.489127	1.03582	1.12369	0.289125	0.54364	zinc finger protein 354B [Source:MGI Symbol;Acc:MGI:1351476]	Zfp354b	1.08388	1.44136	2.12096	2.36506	1.32032	2.95861
ENSMUSG00000091183	0.489018	1.50847	1.80532	0.17907	0.420411	predicted gene 5141 [Source:MGI Symbol;Acc:MGI:3779466]	Gm5141	2.3226	1.44136	3.04889	3.17264	2.51489	3.66514
ENSMUSG00000045268	0.488893	4.04507	6.09254	0.0135754	0.108454	zinc finger protein 691 [Source:MGI Symbol;Acc:MGI:3041163]	Zfp691	15.4066	13.8496	11.2013	25.7272	15.6552	16.3386
ENSMUSG00000026442	0.488872	-0.0193816	0.598563	0.439127	0.674258	neurofascin [Source:MGI Symbol;Acc:MGI:104753]	Nfasc	0.851621	0.752013	0.530241	1.21137	1.32032	0.574058
ENSMUSG00000035283	0.488867	4.75754	6.27079	0.0122744	0.103688	adrenergic receptor, beta 1 [Source:MGI Symbol;Acc:MGI:87937]	Adrb1	22.0647	27.0098	18.0282	39.11	27.6009	27.5548
ENSMUSG00000063193	0.488717	1.91223	2.01858	0.155385	0.388225	CD300 molecule like family member B [Source:MGI Symbol;Acc:MGI:2685099]	Cd300lb	3.32906	1.88003	3.97681	5.07622	3.77233	3.75346
ENSMUSG00000039501	0.488645	6.63789	7.15687	0.00746775	0.0785883	zinc finger, NFX1-type containing 1 [Source:MGI Symbol;Acc:MGI:2138982]	Znfx1	84.4653	86.3561	75.1617	143.865	90.2216	116.445
ENSMUSG00000032300	0.488376	4.2156	5.16155	0.0230923	0.141347	RIKEN cDNA 1700017B05 gene [Source:MGI Symbol;Acc:MGI:1921461]	1700017B05Rik	15.4066	17.359	12.5932	30.0535	17.5413	17.6192
ENSMUSG00000025408	0.488298	4.10569	6.13279	0.0132697	0.107186	DNA-damage inducible transcript 3 [Source:MGI Symbol;Acc:MGI:109247]	Ddit3	14.9421	13.5362	13.5874	26.4771	16.0953	17.7516
ENSMUSG00000034312	0.488276	7.04827	7.17295	0.00740109	0.0783272	IQ motif and Sec7 domain 1 [Source:MGI Symbol;Acc:MGI:1196356]	Iqsec1	145.318	146.392	45.8659	219.085	159.507	77.3654
ENSMUSG00000034845	0.48805	3.52811	5.04866	0.0246449	0.145449	plasmalemma vesicle associated protein [Source:MGI Symbol;Acc:MGI:1890497]	Plvap	8.20653	9.96417	10.2071	12.7482	15.4666	11.7461
ENSMUSG00000094441	0.487933	4.02513	4.12715	0.0422005	0.192988	zinc finger protein 955A [Source:MGI Symbol;Acc:MGI:4834570]	Zfp955a	10.0646	12.5962	17.6305	23.4198	14.9007	18.0607
ENSMUSG00000054545	0.487903	1.01448	0.557914	0.455102	0.686636	UDP glucuronosyltransferase 1 family, polypeptide A6A [Source:MGI Symbol;Acc:MGI:2137698]	Ugt1a6a	3.0968	1.00268	0.861642	1.03832	2.07478	3.22356
ENSMUSG00000070576	0.487658	5.36313	6.14998	0.0131414	0.10696	meningioma 1 [Source:MGI Symbol;Acc:MGI:1261813]	Mn1	41.8843	40.6714	20.348	68.3559	38.855	36.0332
ENSMUSG00000038569	0.487651	1.31504	1.38573	0.239128	0.491601	RAD9 checkpoint clamp component B [Source:MGI Symbol;Acc:MGI:2385231]	Rad9b	1.70324	1.31602	2.98261	2.59579	2.7035	2.78197
ENSMUSG00000044229	0.487409	4.15111	4.41798	0.0355622	0.177432	neurexophilin and PC-esterase domain family, member 4 [Source:MGI Symbol;Acc:MGI:1924792]	Nxpe4	12.7743	15.0403	15.377	28.323	18.7988	15.4112
ENSMUSG00000074194	0.486407	1.74984	1.66387	0.197081	0.441856	zinc finger protein 791 [Source:MGI Symbol;Acc:MGI:3648473]	Zfp791	2.63228	2.63204	2.45237	5.94149	3.77233	2.03128
ENSMUSG00000025375	0.485997	3.00595	3.98542	0.0458956	0.201584	apoptosis-associated tyrosine kinase [Source:MGI Symbol;Acc:MGI:1197518]	Aatk	8.12911	6.14144	5.50125	10.96	7.92189	8.69919
ENSMUSG00000074219	0.485901	1.76236	2.06001	0.151209	0.382608	predicted gene 10644 [Source:MGI Symbol;Acc:MGI:3704314]	Gm10644	3.25164	2.19337	2.65121	5.07622	3.52084	2.91445
ENSMUSG00000090942	0.485849	4.6148	6.34498	0.0117714	0.1016	RIKEN cDNA F830016B08 gene [Source:MGI Symbol;Acc:MGI:3588218]	F830016B08Rik	22.0647	19.1137	18.691	37.7832	20.1191	28.2613
ENSMUSG00000041124	0.485843	6.13906	7.75278	0.00536301	0.0667489	Myb/SANT-like DNA-binding domain containing 4 with coiled-coils [Source:MGI Symbol;Acc:MGI:1925350]	Msantd4	51.9489	57.4036	66.015	92.8718	68.9708	84.6073
ENSMUSG00000024293	0.485668	5.06678	6.04146	0.0139737	0.109894	establishment of sister chromatid cohesion N-acetyltransferase 1 [Source:MGI Symbol;Acc:MGI:1925055]	Esco1	32.2068	21.0564	27.2411	63.2797	28.4182	28.0847
ENSMUSG00000024081	0.48551	5.26008	8.74714	0.00310088	0.0516892	CCAAT/enhancer binding protein zeta [Source:MGI Symbol;Acc:MGI:109386]	Cebpz	28.3358	29.4538	37.7134	45.1091	38.9807	49.2807
ENSMUSG00000073755	0.485287	4.34433	7.3224	0.00681005	0.0748534	RIKEN cDNA 5730409E04Rik gene [Source:MGI Symbol;Acc:MGI:3609248]	5730409E04Rik	16.5679	15.5416	18.1608	25.5542	20.2448	24.817
ENSMUSG00000031986	0.485269	4.18273	5.30344	0.0212834	0.13619	SprT-like N-terminal domain [Source:MGI Symbol;Acc:MGI:2685351]	Sprtn	15.484	12.7842	15.841	30.2266	16.3468	17.3984
ENSMUSG00000043251	0.485214	1.82015	2.09969	0.147329	0.377315	exocyst complex component 3-like [Source:MGI Symbol;Acc:MGI:3041195]	Exoc3l	3.17422	2.75738	2.51865	3.6918	3.58371	4.54831
ENSMUSG00000038214	0.485016	3.9939	5.49556	0.0190648	0.129037	BEN domain containing 3 [Source:MGI Symbol;Acc:MGI:2677212]	Bend3	17.1873	13.3482	9.54434	18.6897	18.7988	17.2217
ENSMUSG00000070462	0.484942	4.61857	7.14117	0.0075334	0.0790253	talin rod domain containing 1 [Source:MGI Symbol;Acc:MGI:1891420]	Tlnrd1	22.4518	20.367	17.5642	38.014	25.4632	22.6974
ENSMUSG00000029594	0.484941	4.68333	6.29392	0.0121153	0.103008	RNA binding motif protein 19 [Source:MGI Symbol;Acc:MGI:1921361]	Rbm19	21.0583	24.5657	17.8956	38.014	26.2806	25.4352
ENSMUSG00000024232	0.484812	4.92638	8.36874	0.0038173	0.0565772	BMP and activin membrane-bound inhibitor [Source:MGI Symbol;Acc:MGI:1915260]	Bambi	24.9293	24.5031	25.9818	39.11	30.6816	36.254
ENSMUSG00000039670	0.484787	4.32714	4.58173	0.0323145	0.168411	oxidoreductase like domain containing 1 [Source:MGI Symbol;Acc:MGI:1913681]	Oxld1	12.4646	19.5523	17.7631	27.9192	22.9483	18.8556
ENSMUSG00000048371	0.484591	4.86352	8.32369	0.00391313	0.0576065	pyruvate dehyrogenase phosphatase catalytic subunit 2 [Source:MGI Symbol;Acc:MGI:1918878]	Pdp2	25.2389	22.9364	23.9934	39.5138	30.996	31.0874
ENSMUSG00000035566	0.484585	3.81065	5.90985	0.0150564	0.114188	protocadherin 17 [Source:MGI Symbol;Acc:MGI:2684924]	Pcdh17	13.0066	8.89882	12.5932	20.4203	11.82	16.5152
ENSMUSG00000042548	0.484486	6.16772	7.59123	0.0058653	0.0694965	additional sex combs like 1 [Source:MGI Symbol;Acc:MGI:2684063]	Asxl1	60.8522	64.1717	52.1625	109.312	80.8536	63.1464
ENSMUSG00000059708	0.48429	3.38223	4.1397	0.0418886	0.192269	A kinase (PRKA) anchor protein 17B [Source:MGI Symbol;Acc:MGI:2443758]	Akap17b	8.36137	8.83615	8.15246	15.7478	11.6314	9.00829
ENSMUSG00000026466	0.483675	7.0216	7.70385	0.00551031	0.0675752	torsin A interacting protein 1 [Source:MGI Symbol;Acc:MGI:3582693]	Tor1aip1	127.201	124.709	74.1675	193.069	143.411	116.225
ENSMUSG00000031245	0.483552	2.09994	2.14695	0.142854	0.370995	high-mobility group nucleosome binding domain 5 [Source:MGI Symbol;Acc:MGI:1355295]	Hmgn5	2.86454	4.0734	3.18145	3.34569	4.40105	6.75622
ENSMUSG00000027583	0.483093	5.10835	8.56383	0.00342907	0.0542275	zinc finger and BTB domain containing 46 [Source:MGI Symbol;Acc:MGI:1919397]	Zbtb46	32.439	30.5818	22.6015	50.9353	37.849	31.7498
ENSMUSG00000054199	0.483009	6.62152	8.14845	0.00430979	0.0598791	gon-4-like (C.elegans) [Source:MGI Symbol;Acc:MGI:1917579]	Gon4l	115.201	71.5039	53.0904	192.435	85.4433	72.4196
ENSMUSG00000053091	0.482513	2.90799	2.94835	0.0859654	0.28242	lines homolog 1 [Source:MGI Symbol;Acc:MGI:1919885]	Lins1	8.90331	6.45478	3.51285	11.0177	6.72732	7.63939
ENSMUSG00000018347	0.482462	3.2042	2.81211	0.0935551	0.29701	zinc finger with KRAB and SCAN domains 6 [Source:MGI Symbol;Acc:MGI:1289293]	Zkscan6	5.88393	6.45478	10.5385	12.8636	9.9338	8.74334
ENSMUSG00000066306	0.482379	7.57627	7.27973	0.00697369	0.0758882	nuclear mitotic apparatus protein 1 [Source:MGI Symbol;Acc:MGI:2443665]	Numa1	178.995	167.824	123.878	312.015	193.521	168.022
ENSMUSG00000025208	0.482292	5.4327	7.10044	0.00770649	0.0797555	mitochondrial ribosomal protein L43 [Source:MGI Symbol;Acc:MGI:2137229]	Mrpl43	31.8971	36.1593	39.3704	58.2612	48.9145	43.6284
ENSMUSG00000031673	0.482254	3.41415	4.43485	0.0352124	0.176421	cadherin 11 [Source:MGI Symbol;Acc:MGI:99217]	Cdh11	6.58071	8.64815	10.9362	11.3638	9.55657	15.7204
ENSMUSG00000054716	0.482065	4.2464	7.07951	0.00779703	0.0801858	zinc finger protein 771 [Source:MGI Symbol;Acc:MGI:2442050]	Zfp771	15.7163	16.8576	14.5816	22.3815	22.634	20.7986
ENSMUSG00000049929	0.48197	1.29805	1.22263	0.268846	0.524377	lysophosphatidic acid receptor 4 [Source:MGI Symbol;Acc:MGI:1925384]	Lpar4	0.851621	2.1307	2.91633	2.36506	2.01191	3.44435
ENSMUSG00000053916	0.481719	0.546365	0.78669	0.375103	0.620047	N-acetylneuraminic acid phosphatase [Source:MGI Symbol;Acc:MGI:1914561]	Nanp	1.47098	0.626677	1.3256	1.73053	1.50893	1.36891
ENSMUSG00000000686	0.481508	2.31703	2.83297	0.0923472	0.29525	abhydrolase domain containing 15 [Source:MGI Symbol;Acc:MGI:1914727]	Abhd15	3.94842	3.63473	4.44077	5.13391	4.90403	6.84454
ENSMUSG00000024420	0.481485	5.61168	6.41862	0.011293	0.0994362	zinc finger protein 521 [Source:MGI Symbol;Acc:MGI:95459]	Zfp521	45.7553	41.5487	30.4226	89.6415	50.8636	34.3993
ENSMUSG00000022000	0.48126	5.83486	6.47992	0.01091	0.0975613	zinc finger CCCH type containing 13 [Source:MGI Symbol;Acc:MGI:1914552]	Zc3h13	51.8715	44.8074	41.6902	100.948	48.1601	54.0939
ENSMUSG00000056459	0.480944	2.57624	2.283	0.130799	0.354421	zinc finger and BTB domain containing 25 [Source:MGI Symbol;Acc:MGI:99197]	Zbtb25	4.33552	5.51476	4.30821	10.2678	5.02977	5.43147
ENSMUSG00000040429	0.48089	1.43074	1.34635	0.245917	0.49969	mitochondrial transcription termination factor 1a [Source:MGI Symbol;Acc:MGI:1918240]	Mterf1a	1.47098	1.7547	3.18145	3.80717	2.13765	2.91445
ENSMUSG00000028639	0.480832	8.8505	8.54806	0.00345891	0.0542856	Y box protein 1 [Source:MGI Symbol;Acc:MGI:99146]	Ybx1	362.016	423.571	368.783	610.935	500.588	502.742
ENSMUSG00000027454	0.480454	1.4264	1.55892	0.211823	0.459945	GINS complex subunit 1 (Psf1 homolog) [Source:MGI Symbol;Acc:MGI:1916520]	Gins1	2.40002	1.25335	2.85005	2.76885	2.64063	3.35603
ENSMUSG00000035778	0.480163	4.98687	5.67932	0.017166	0.122299	glycoprotein galactosyltransferase alpha 1, 3 [Source:MGI Symbol;Acc:MGI:95704]	Ggta1	21.2905	28.7645	28.7656	44.59	31.9391	33.9136
ENSMUSG00000039810	0.479911	3.78784	4.79368	0.0285644	0.157116	zinc finger CCCH type containing 10 [Source:MGI Symbol;Acc:MGI:2143670]	Zc3h10	10.5291	8.96148	14.913	18.5744	13.4546	15.4996
ENSMUSG00000041757	0.479842	6.87792	5.7566	0.0164268	0.119569	pleckstrin homology domain containing, family A member 6 [Source:MGI Symbol;Acc:MGI:2388662]	Plekha6	116.44	114.933	64.0266	186.147	110.592	112.692
ENSMUSG00000057506	0.479658	2.74471	2.72062	0.0990594	0.305031	biogenesis of lysosomal organelles complex-1, subunit 2 [Source:MGI Symbol;Acc:MGI:1920939]	Bloc1s2	4.49036	5.26409	6.62802	9.17181	7.48179	6.31464
ENSMUSG00000102049	0.479051	6.80048	7.39711	0.00653288	0.0734341	zinc finger, BED type containing 6 [Source:MGI Symbol;Acc:MGI:3828086]	Zbed6	111.408	101.083	63.0324	189.781	113.799	88.9348
ENSMUSG00000028549	0.478985	1.6034	1.56043	0.211602	0.459693	integrin beta 3 binding protein (beta3-endonexin) [Source:MGI Symbol;Acc:MGI:1914983]	Itgb3bp	1.5484	1.62936	4.24193	1.96127	3.64659	4.2392
ENSMUSG00000083012	0.478771	6.0316	7.22432	0.00719226	0.0774846	family with sequence similarity 220, member A [Source:MGI Symbol;Acc:MGI:1914488]	Fam220a	54.5812	53.4556	53.6869	98.2941	62.4321	69.1078
ENSMUSG00000011305	0.478538	6.92032	8.07617	0.00448512	0.0610218	perilipin 5 [Source:MGI Symbol;Acc:MGI:1914218]	Plin5	110.866	104.154	86.6944	173.168	136.244	114.767
ENSMUSG00000027963	0.478462	4.30347	5.49414	0.0190803	0.129037	exostoses (multiple)-like 2 [Source:MGI Symbol;Acc:MGI:1889574]	Extl2	14.9421	20.743	13.72	25.5542	20.9993	21.5493
ENSMUSG00000103088	0.478158	4.3099	4.01542	0.0450859	0.200179	protocadherin gamma subfamily B, 6 [Source:MGI Symbol;Acc:MGI:1935197]	Pcdhgb6	17.8066	15.2283	14.0514	36.5719	12.763	21.5934
ENSMUSG00000020519	0.478138	4.64224	7.08085	0.00779122	0.0801858	SAP30-like [Source:MGI Symbol;Acc:MGI:1354709]	Sap30l	21.2905	19.239	21.5411	32.1879	29.8643	24.8611
ENSMUSG00000023912	0.478132	2.83442	2.87133	0.0901703	0.290988	solute carrier family 25, member 27 [Source:MGI Symbol;Acc:MGI:1921261]	Slc25a27	6.03877	6.39211	4.70589	12.1137	6.28722	6.40295
ENSMUSG00000051721	0.478022	3.60835	5.10154	0.0239046	0.143209	WD repeat and coiled coil containing [Source:MGI Symbol;Acc:MGI:3040699]	Wdcp	11.8453	9.65083	8.41758	19.2666	11.6942	11.4812
ENSMUSG00000031916	0.477884	5.1736	8.90149	0.00284939	0.0494473	component of oligomeric golgi complex 8 [Source:MGI Symbol;Acc:MGI:2142885]	Cog8	32.8261	28.9525	28.2353	47.3588	40.5525	37.7554
ENSMUSG00000024246	0.477813	1.96477	1.55421	0.212515	0.460684	THUMP domain containing 2 [Source:MGI Symbol;Acc:MGI:1919417]	Thumpd2	2.24518	3.57206	3.38029	5.76843	5.28126	2.42871
ENSMUSG00000071076	0.477557	6.88857	7.74732	0.00537923	0.0667489	jun D proto-oncogene [Source:MGI Symbol;Acc:MGI:96648]	Jund	104.362	101.396	89.4119	168.784	124.801	121.259
ENSMUSG00000036086	0.477375	3.28786	4.36677	0.0366464	0.179895	zinc finger, RAN-binding domain containing 3 [Source:MGI Symbol;Acc:MGI:1918362]	Zranb3	10.3743	7.52013	6.42918	13.0943	10.6883	9.71483
ENSMUSG00000038193	0.477246	5.98829	8.04724	0.00455731	0.0614931	heart and neural crest derivatives expressed transcript 2 [Source:MGI Symbol;Acc:MGI:103580]	Hand2	55.8199	61.7277	40.0332	94.0831	77.2699	51.1795
ENSMUSG00000021271	0.476939	4.29285	5.70875	0.0168806	0.121447	zinc finger protein 839 [Source:MGI Symbol;Acc:MGI:1920055]	Zfp839	17.2647	14.5389	16.1061	31.8994	18.2958	18.6348
ENSMUSG00000002257	0.47683	2.08214	2.2744	0.131526	0.355458	differentially expressed in FDCP 6 [Source:MGI Symbol;Acc:MGI:1346328]	Def6	4.2581	2.31871	3.77797	5.99917	4.27531	4.01841
ENSMUSG00000024079	0.476826	4.8485	7.45553	0.0063242	0.0725424	eukaryotic translation initiation factor 2-alpha kinase 2 [Source:MGI Symbol;Acc:MGI:1353449]	Eif2ak2	21.5228	22.4977	27.8377	36.2258	28.9212	34.8409
ENSMUSG00000041297	0.476652	6.47456	7.39185	0.00655201	0.0734341	cyclin-dependent kinase 13 [Source:MGI Symbol;Acc:MGI:1916812]	Cdk13	74.9426	70.5012	74.764	134.116	86.5121	91.8051
ENSMUSG00000040841	0.476607	3.80132	5.65645	0.0173913	0.122902	sine oculis-related homeobox 5 [Source:MGI Symbol;Acc:MGI:106220]	Six5	13.6259	11.7815	9.21294	19.8434	14.3977	13.954
ENSMUSG00000039164	0.476355	3.00221	2.65297	0.103357	0.311883	nuclear apoptosis inducing factor 1 [Source:MGI Symbol;Acc:MGI:1918504]	Naif1	4.95489	8.39748	6.29661	11.883	8.11051	7.50691
ENSMUSG00000015597	0.47575	5.51864	6.42015	0.0112833	0.0994171	zinc finger protein 318 [Source:MGI Symbol;Acc:MGI:1889348]	Zfp318	40.4133	41.4234	31.218	74.009	42.6273	44.4674
ENSMUSG00000041241	0.475567	6.00674	8.29494	0.00397556	0.0580479	mitochondrial ubiquitin ligase activator of NFKB 1 [Source:MGI Symbol;Acc:MGI:1915600]	Mul1	57.8328	57.7796	44.6065	92.9295	71.4857	60.3202
ENSMUSG00000039531	0.475321	3.41713	4.57632	0.0324167	0.168428	zinc finger with UFM1-specific peptidase domain [Source:MGI Symbol;Acc:MGI:1919830]	Zufsp	9.60009	8.71081	8.0199	14.1327	10.0595	12.6293
ENSMUSG00000038914	0.47513	7.04774	6.18503	0.0128835	0.105831	death inducer-obliterator 1 [Source:MGI Symbol;Acc:MGI:1344352]	Dido1	111.795	114.807	99.5528	212.451	126.75	127.573
ENSMUSG00000005936	0.474988	5.6161	6.30781	0.0120208	0.102638	potassium channel tetramerisation domain containing 20 [Source:MGI Symbol;Acc:MGI:1914239]	Kctd20	30.2713	48.3795	45.0705	57.2805	50.4863	61.6892
ENSMUSG00000028958	0.474936	3.10676	3.12891	0.076915	0.265805	transmembrane and ubiquitin-like domain containing 1 [Source:MGI Symbol;Acc:MGI:1923764]	Tmub1	5.88393	9.14949	6.29661	10.3832	8.29913	10.6422
ENSMUSG00000035248	0.474913	6.41677	7.31219	0.00684882	0.0750906	zinc finger, CCHC domain containing 6 [Source:MGI Symbol;Acc:MGI:2387179]	Zcchc6	70.9942	69.4358	71.5163	125.406	80.4135	93.8806
ENSMUSG00000037958	0.474576	3.88815	4.2172	0.0400163	0.187658	nuclear speckle regulatory protein 1 [Source:MGI Symbol;Acc:MGI:2144305]	Nsrp1	11.3808	12.0949	12.5269	22.843	11.5685	17.3984
ENSMUSG00000072966	0.474575	0.49747	0.806752	0.369082	0.61583	G protein-coupled receptor associated sorting protein 2 [Source:MGI Symbol;Acc:MGI:2442071]	Gprasp2	0.851621	0.940016	1.39188	1.21137	1.38319	1.81049
ENSMUSG00000027544	0.474488	4.68158	5.98944	0.0143918	0.111489	nuclear factor of activated T cells, cytoplasmic, calcineurin dependent 2 [Source:MGI Symbol;Acc:MGI:102463]	Nfatc2	29.5745	27.0098	9.3455	41.2443	29.0469	17.1334
ENSMUSG00000031931	0.474089	3.31486	4.48278	0.0342381	0.173602	ankyrin repeat domain 49 [Source:MGI Symbol;Acc:MGI:1930842]	Ankrd49	8.28395	6.95612	9.3455	12.4021	9.61944	12.1435
ENSMUSG00000078137	0.473821	2.7119	2.88252	0.089546	0.289615	ankyrin repeat domain 63 [Source:MGI Symbol;Acc:MGI:2686183]	Ankrd63	7.74201	6.14144	2.51865	11.2484	6.41296	4.59246
ENSMUSG00000023022	0.473764	5.78302	7.70363	0.00551097	0.0675752	LIM domain and actin binding 1 [Source:MGI Symbol;Acc:MGI:1920992]	Lima1	47.2263	47.7528	41.9553	79.8351	55.3275	57.3616
ENSMUSG00000026826	0.473548	0.798995	0.61708	0.432135	0.668935	nuclear receptor subfamily 4, group A, member 2 [Source:MGI Symbol;Acc:MGI:1352456]	Nr4a2	1.00646	2.19337	0.795362	3.11495	1.06883	1.41307
ENSMUSG00000056073	0.473458	-0.279337	0.458703	0.498231	0.718132	glutamate receptor, ionotropic, kainate 2 (beta 2) [Source:MGI Symbol;Acc:MGI:95815]	Grik2	0.774201	0.501342	0.463961	0.692212	0.691594	1.01564
ENSMUSG00000020652	0.473403	2.49681	2.59334	0.107314	0.318033	centromere protein O [Source:MGI Symbol;Acc:MGI:1923800]	Cenpo	3.40648	6.83078	3.84425	6.05685	6.79019	6.00553
ENSMUSG00000057406	0.473265	5.46833	8.63749	0.00329315	0.0532678	nuclear receptor binding SET domain protein 2 [Source:MGI Symbol;Acc:MGI:1276574]	Nsd2	40.8004	31.0205	39.3704	54.2233	48.2229	51.0912
ENSMUSG00000001300	0.47291	5.1365	8.39176	0.00376925	0.0562959	ephrin B2 [Source:MGI Symbol;Acc:MGI:105097]	Efnb2	37.0842	30.0805	20.4143	56.1845	38.352	28.2172
ENSMUSG00000020684	0.472881	5.27057	4.26711	0.038857	0.185399	RAS-like, family 10, member B [Source:MGI Symbol;Acc:MGI:2685575]	Rasl10b	39.4842	40.1073	19.3538	37.0333	48.9145	45.8363
ENSMUSG00000038248	0.472604	4.75648	5.52995	0.0186936	0.128021	sine oculis-binding protein homolog (Drosophila) [Source:MGI Symbol;Acc:MGI:1924427]	Sobp	26.4002	30.7699	10.4723	47.5896	30.5559	15.7204
ENSMUSG00000030172	0.472102	6.78969	6.87622	0.00873501	0.0854075	ELKS/RAB6-interacting/CAST family member 1 [Source:MGI Symbol;Acc:MGI:2151013]	Erc1	99.9493	92.7482	81.9886	165.15	98.2692	124.747
ENSMUSG00000042138	0.472073	3.53572	2.58064	0.108178	0.319869	Myb/SANT-like DNA-binding domain containing 2 [Source:MGI Symbol;Acc:MGI:2384579]	Msantd2	8.28395	8.52281	10.5385	22.4392	9.55657	9.36156
ENSMUSG00000014074	0.471971	4.72095	6.14845	0.0131527	0.10696	ring finger protein 168 [Source:MGI Symbol;Acc:MGI:1917488]	Rnf168	20.6712	22.247	22.4027	36.3988	23.8286	31.6615
ENSMUSG00000090093	0.471645	3.55311	2.56113	0.10952	0.321879	predicted gene 14399 [Source:MGI Symbol;Acc:MGI:3650082]	Gm14399	6.03877	8.64815	15.1782	16.1516	11.0655	12.3643
ENSMUSG00000033082	0.471579	5.37545	5.86478	0.0154468	0.115516	C-type lectin domain family 1, member a [Source:MGI Symbol;Acc:MGI:2444151]	Clec1a	38.4778	33.0259	28.9644	75.9126	34.3282	37.4904
ENSMUSG00000037001	0.471513	3.09728	3.37824	0.0660627	0.245408	zinc finger protein 39 [Source:MGI Symbol;Acc:MGI:99183]	Zfp39	7.50975	6.70545	6.42918	14.4788	8.17338	7.24196
ENSMUSG00000048621	0.471407	0.262621	0.547267	0.459437	0.689602	predicted gene 6377 [Source:MGI Symbol;Acc:MGI:3647255]	Gm6377	1.1613	0.81468	0.596521	1.32674	0.628722	1.76633
ENSMUSG00000037813	0.471401	3.71562	5.11195	0.0237616	0.14319	RIKEN cDNA D630003M21 gene [Source:MGI Symbol;Acc:MGI:3606579]	D630003M21Rik	12.5421	9.77616	9.94202	20.7087	13.4546	11.6136
ENSMUSG00000034203	0.471279	4.90953	8.07043	0.00449934	0.0610885	coiled-coil-helix-coiled-coil-helix domain containing 4 [Source:MGI Symbol;Acc:MGI:1919420]	Chchd4	24.6196	25.3178	25.1865	34.3799	37.1574	32.7655
ENSMUSG00000042190	0.471269	4.94711	7.15199	0.00748808	0.078739	chemokine-like receptor 1 [Source:MGI Symbol;Acc:MGI:109603]	Cmklr1	24.8518	24.3151	27.44	42.9748	28.7955	35.7241
ENSMUSG00000017144	0.471145	4.84319	6.58756	0.0102694	0.0939592	Rho family GTPase 3 [Source:MGI Symbol;Acc:MGI:1921444]	Rnd3	20.3615	20.4923	30.4889	36.3411	23.2627	40.1399
ENSMUSG00000026875	0.471083	1.16952	1.02351	0.311687	0.564962	TNF receptor-associated factor 1 [Source:MGI Symbol;Acc:MGI:101836]	Traf1	0.851621	2.38137	2.18725	2.53811	2.13765	2.47287
ENSMUSG00000001053	0.470885	3.97925	4.93615	0.0263005	0.150679	NEDD4 binding protein 3 [Source:MGI Symbol;Acc:MGI:2442218]	N4bp3	11.9227	15.2283	11.8641	22.843	17.227	14.6606
ENSMUSG00000000204	0.470672	2.42151	2.78585	0.0951004	0.299953	schlafen 4 [Source:MGI Symbol;Acc:MGI:1329010]	Slfn4	2.94196	3.76006	6.36289	4.73012	4.77828	8.43424
ENSMUSG00000016526	0.470586	0.14277	0.586739	0.443683	0.677759	dual-specificity tyrosine-(Y)-phosphorylation regulated kinase 3 [Source:MGI Symbol;Acc:MGI:1330300]	Dyrk3	0.619361	0.940016	0.861642	1.38442	0.943082	1.0598
ENSMUSG00000047759	0.470558	0.71529	0.76291	0.382419	0.626229	heparan sulfate (glucosamine) 3-O-sulfotransferase 3A1 [Source:MGI Symbol;Acc:MGI:1333861]	Hs3st3a1	0.851621	1.56669	1.3256	2.36506	1.82329	1.14812
ENSMUSG00000023829	0.470553	-0.310316	0.0691315	0.792606	0.902313	solute carrier family 22 (organic cation transporter), member 1 [Source:MGI Symbol;Acc:MGI:108111]	Slc22a1	0.851621	0	0.463961	1.03832	1.94904	0
ENSMUSG00000023411	0.470509	3.02474	3.76571	0.0523135	0.216934	nuclear factor of activated T cells, cytoplasmic, calcineurin dependent 4 [Source:MGI Symbol;Acc:MGI:1920431]	Nfatc4	9.05815	7.20679	4.10937	11.883	9.4937	6.40295
ENSMUSG00000030519	0.470292	0.41312	0.673888	0.411699	0.650674	amyloid beta (A4) precursor protein-binding, family A, member 2 [Source:MGI Symbol;Acc:MGI:1261791]	Apba2	0.774201	1.06535	1.06048	0.807581	2.38914	1.14812
ENSMUSG00000021265	0.470283	3.72663	4.8339	0.0279055	0.155252	solute carrier family 25 (mitochondrial carrier, palmitoylcarnitine transporter), member 29 [Source:MGI Symbol;Acc:MGI:2444911]	Slc25a29	9.29041	17.4843	6.95942	15.2863	19.0503	10.5538
ENSMUSG00000040822	0.468798	3.26983	3.77938	0.0518878	0.216163	RIKEN cDNA 1700123O20 gene [Source:MGI Symbol;Acc:MGI:1920893]	1700123O20Rik	7.12265	7.9588	8.74898	12.5175	11.0655	9.58235
ENSMUSG00000091337	0.468613	5.65597	7.03638	0.00798705	0.0812212	EP300 interacting inhibitor of differentiation 1 [Source:MGI Symbol;Acc:MGI:1889651]	Eid1	41.3423	37.6633	46.2635	74.2974	45.6452	56.346
ENSMUSG00000090641	0.468541	1.70262	1.55594	0.21226	0.460283	zinc finger protein 712 [Source:MGI Symbol;Acc:MGI:1925501]	Zfp712	2.3226	2.63204	2.65121	5.48001	2.82925	2.78197
ENSMUSG00000057637	0.467941	5.89124	6.25358	0.0123942	0.103962	PR domain containing 2, with ZNF domain [Source:MGI Symbol;Acc:MGI:107628]	Prdm2	63.3296	60.2864	25.9818	103.543	59.7914	42.4803
ENSMUSG00000039741	0.46704	4.6704	5.83599	0.0157016	0.116424	BAH domain and coiled-coil containing 1 [Source:MGI Symbol;Acc:MGI:2679272]	Bahcc1	31.1229	27.1978	7.42338	43.8978	29.2356	13.38
ENSMUSG00000045790	0.466769	3.33424	3.33821	0.0676881	0.248265	coiled-coil domain containing 149 [Source:MGI Symbol;Acc:MGI:2685293]	Ccdc149	6.81297	9.58816	8.41758	14.3057	11.8828	8.65503
ENSMUSG00000050174	0.466721	2.97099	2.7944	0.0945944	0.299285	nudix (nucleoside diphosphate linked moiety X)-type motif 6 [Source:MGI Symbol;Acc:MGI:2387618]	Nudt6	3.63874	10.6535	5.83265	7.67202	10.2482	8.03681
ENSMUSG00000021720	0.466584	0.79634	0.700629	0.402572	0.643959	ring finger protein 180 [Source:MGI Symbol;Acc:MGI:1919066]	Rnf180	1.85808	1.25335	0.861642	1.26906	1.5718	2.69366
ENSMUSG00000044791	0.46658	6.91704	5.55648	0.0184124	0.126834	SET domain containing 2 [Source:MGI Symbol;Acc:MGI:1918177]	Setd2	103.046	96.571	97.0341	202.414	104.619	120.464
ENSMUSG00000056671	0.465724	2.56232	2.62311	0.105318	0.314968	PRELI domain containing 2 [Source:MGI Symbol;Acc:MGI:1924869]	Prelid2	4.80005	4.88808	4.63961	7.84507	7.98476	4.54831
ENSMUSG00000034292	0.465567	3.09014	3.76743	0.0522599	0.216886	TRAF3 interacting protein 1 [Source:MGI Symbol;Acc:MGI:1921269]	Traf3ip1	8.98073	5.32676	6.95942	11.4215	8.73923	8.87582
ENSMUSG00000020639	0.465191	0.509109	0.688488	0.406679	0.647099	profilin family, member 4 [Source:MGI Symbol;Acc:MGI:1920121]	Pfn4	1.00646	1.31602	0.861642	2.192	1.06883	1.28059
ENSMUSG00000058620	0.465135	1.03893	0.997936	0.317811	0.570405	adrenergic receptor, alpha 2b [Source:MGI Symbol;Acc:MGI:87935]	Adra2b	1.70324	2.06803	0.994202	3.57643	1.82329	1.41307
ENSMUSG00000022346	0.465043	3.00197	3.31083	0.0688249	0.250323	myelocytomatosis oncogene [Source:MGI Symbol;Acc:MGI:97250]	Myc	6.19361	5.76543	7.88734	8.19117	10.3739	8.7875
ENSMUSG00000028952	0.464812	2.77443	3.02562	0.0819588	0.274145	zinc finger and BTB domain containing 48 [Source:MGI Symbol;Acc:MGI:2140248]	Zbtb48	6.27103	3.8854	6.82686	9.40255	6.35009	7.46275
ENSMUSG00000090035	0.464803	3.76538	4.61204	0.0317483	0.166854	UDP-N-acetyl-alpha-D-galactosamine:polypeptide N-acetylgalactosaminyltransferase 4 [Source:MGI Symbol;Acc:MGI:894692]	Galnt4	10.5291	12.2202	10.9362	18.6897	13.0145	15.2346
ENSMUSG00000029348	0.464762	0.630966	0.768764	0.3806	0.624733	aspartate beta-hydroxylase domain containing 2 [Source:MGI Symbol;Acc:MGI:1920148]	Asphd2	0.851621	1.25335	1.39188	1.90358	1.1317	1.85465
ENSMUSG00000049866	0.464621	4.27073	6.04293	0.0139621	0.109894	ADP-ribosylation factor-like 4C [Source:MGI Symbol;Acc:MGI:2445172]	Arl4c	15.5614	12.0949	21.0771	21.4009	19.7419	24.9494
ENSMUSG00000047423	0.464533	4.75398	6.81624	0.00903327	0.0872816	expressed sequence AI837181 [Source:MGI Symbol;Acc:MGI:2147598]	AI837181	22.8389	22.9991	21.3422	38.3024	29.0469	26.495
ENSMUSG00000078580	0.464382	2.84477	3.22735	0.0724177	0.256506	RIKEN cDNA E430018J23 gene [Source:MGI Symbol;Acc:MGI:2141981]	E430018J23Rik	5.72909	5.01342	6.95942	9.46023	6.85307	8.16929
ENSMUSG00000048251	0.464341	1.33664	1.20474	0.272376	0.528066	B cell leukemia/lymphoma 11B [Source:MGI Symbol;Acc:MGI:1929913]	Bcl11b	2.47744	2.38137	1.12676	4.38401	1.88616	2.1196
ENSMUSG00000042099	0.464258	6.02827	7.20415	0.0072735	0.0778574	KN motif and ankyrin repeat domains 3 [Source:MGI Symbol;Acc:MGI:1098615]	Kank3	61.007	51.0115	49.5776	104.812	64.2554	60.0995
ENSMUSG00000020956	0.464244	2.88511	3.41649	0.0645482	0.241878	D-tyrosyl-tRNA deacylase 2 [Source:MGI Symbol;Acc:MGI:1923485]	Dtd2	6.11619	6.39211	5.70009	9.51791	8.61349	7.15365
ENSMUSG00000061410	0.464234	6.41694	6.77317	0.00925381	0.0884343	zinc finger, CCHC domain containing 14 [Source:MGI Symbol;Acc:MGI:2159407]	Zcchc14	86.0137	78.5853	48.5171	143.461	83.5571	71.7572
ENSMUSG00000035914	0.464135	2.15363	2.25805	0.132922	0.357876	CD276 antigen [Source:MGI Symbol;Acc:MGI:2183926]	Cd276	2.94196	3.57206	4.30821	5.5377	4.27531	5.12236
ENSMUSG00000006542	0.46413	1.80116	1.97075	0.160368	0.39447	protein kinase, AMP-activated, gamma 3 non-catatlytic subunit [Source:MGI Symbol;Acc:MGI:1891343]	Prkag3	2.40002	3.38406	2.65121	3.92253	4.46392	3.26771
ENSMUSG00000051373	0.464083	5.24197	7.34047	0.00674194	0.0743542	phospholipid phosphatase 7 (inactive) [Source:MGI Symbol;Acc:MGI:2445183]	Plpp7	29.3422	34.7179	30.8203	49.5508	41.3699	40.3165
ENSMUSG00000044030	0.463906	4.86201	6.28147	0.0122007	0.10327	interferon regulatory factor 2 binding protein 1 [Source:MGI Symbol;Acc:MGI:2442159]	Irf2bp1	24.0002	28.7645	19.6852	43.3786	32.3792	25.4352
ENSMUSG00000061650	0.463682	4.68031	5.6754	0.0172044	0.122412	mediator complex subunit 9 [Source:MGI Symbol;Acc:MGI:2183151]	Med9	17.1873	24.3151	22.8667	32.4186	30.5559	25.5677
ENSMUSG00000031681	0.463495	4.61985	6.69833	0.00965032	0.0905877	SMAD family member 1 [Source:MGI Symbol;Acc:MGI:109452]	Smad1	21.2131	18.4243	21.7399	33.9761	25.086	26.1859
ENSMUSG00000048218	0.463338	3.01034	2.4168	0.12004	0.338813	adhesion molecule with Ig like domain 2 [Source:MGI Symbol;Acc:MGI:2145995]	Amigo2	5.72909	7.39479	6.23033	13.9596	6.97881	7.15365
ENSMUSG00000035370	0.462981	3.00037	0.93598	0.333314	0.583735	adenosine deaminase, tRNA-specific 3 [Source:MGI Symbol;Acc:MGI:1924344]	Adat3	9.98719	7.9588	2.51865	4.7878	9.74519	12.0994
ENSMUSG00000096549	0.462928	0.442922	0.459655	0.497785	0.717964	prickle planar cell polarity protein 4 [Source:MGI Symbol;Acc:MGI:2685785]	Prickle4	1.85808	1.12802	0.331401	1.15369	1.1317	1.76633
ENSMUSG00000024795	0.46274	2.33563	1.59961	0.205958	0.453599	kinesin family member 20B [Source:MGI Symbol;Acc:MGI:2444576]	Kif20b	3.0968	2.38137	6.42918	8.94107	2.2634	6.138
ENSMUSG00000074909	0.462739	5.41001	8.06405	0.00451522	0.0612406	RAN binding protein 6 [Source:MGI Symbol;Acc:MGI:2683212]	Ranbp6	34.2971	32.8379	39.6355	53.7618	43.256	50.3405
ENSMUSG00000046962	0.462378	4.2307	4.607	0.0318417	0.16699	zinc finger and BTB domain containing 21 [Source:MGI Symbol;Acc:MGI:1927240]	Zbtb21	16.1808	12.3455	18.227	28.0346	19.8676	17.1776
ENSMUSG00000070583	0.462345	3.7943	5.22399	0.0222773	0.138989	Friend virus susceptibility 1 [Source:MGI Symbol;Acc:MGI:95595]	Fv1	14.6324	11.0295	8.55014	23.3045	14.1462	10.8629
ENSMUSG00000038637	0.462332	1.74614	1.19394	0.274536	0.530467	leucine rich repeat containing 56 [Source:MGI Symbol;Acc:MGI:1917802]	Lrrc56	3.71616	3.32139	1.3256	2.65348	4.08669	4.19504
ENSMUSG00000032239	0.462329	4.97113	7.7504	0.00537007	0.0667489	retinitis pigmentosa 9 (human) [Source:MGI Symbol;Acc:MGI:2157166]	Rp9	23.6905	26.8845	28.2353	36.6296	35.7114	36.0773
ENSMUSG00000024191	0.462315	4.41282	6.16338	0.0130422	0.106533	BCL2/adenovirus E1B interacting protein 1 [Source:MGI Symbol;Acc:MGI:109328]	Bnip1	17.5744	18.863	16.6363	29.7651	22.3825	21.6817
ENSMUSG00000033762	0.462072	0.755753	0.708621	0.399902	0.641704	RecQ protein-like 4 [Source:MGI Symbol;Acc:MGI:1931028]	Recql4	0.929041	1.19069	1.72328	2.71116	1.50893	1.28059
ENSMUSG00000034911	0.46205	6.07747	8.18445	0.0042251	0.059491	USH1 protein network component harmonin binding protein 1 [Source:MGI Symbol;Acc:MGI:1922920]	Ushbp1	66.4264	49.2568	53.6206	98.6979	66.9589	69.3727
ENSMUSG00000045201	0.461859	4.1207	5.96949	0.0145555	0.112293	leucine rich repeat containing 3B [Source:MGI Symbol;Acc:MGI:2384996]	Lrrc3b	14.7098	16.1683	12.4607	23.7659	20.6849	15.7645
ENSMUSG00000102742	0.461312	4.09987	2.79363	0.0946395	0.299285	protocadherin gamma subfamily A, 11 [Source:MGI Symbol;Acc:MGI:1935228]	Pcdhga11	13.7808	14.6016	11.0025	36.9757	16.0324	9.71483
ENSMUSG00000036894	0.461307	3.81141	5.05389	0.0245708	0.145143	RAP2B, member of RAS oncogene family [Source:MGI Symbol;Acc:MGI:1921262]	Rap2b	13.5485	13.0349	8.48386	20.9394	14.7121	12.7176
ENSMUSG00000052854	0.461133	0.388898	0.513638	0.473568	0.699596	Nik related kinase [Source:MGI Symbol;Acc:MGI:1351326]	Nrk	0.30968	0.626677	2.45237	0.865265	1.25744	1.50138
ENSMUSG00000053746	0.461086	1.99507	1.80524	0.179081	0.420411	peptidyl-tRNA hydrolase 1 homolog [Source:MGI Symbol;Acc:MGI:1913779]	Ptrh1	2.3226	3.19605	4.17565	5.30696	3.70946	4.28336
ENSMUSG00000031955	0.461028	4.99623	7.19472	0.00731184	0.0780128	breast cancer anti-estrogen resistance 1 [Source:MGI Symbol;Acc:MGI:108091]	Bcar1	30.4261	28.2631	20.4143	50.7622	35.7114	25.1702
ENSMUSG00000069171	0.460889	1.52393	1.64451	0.199708	0.445148	nuclear receptor subfamily 2, group F, member 1 [Source:MGI Symbol;Acc:MGI:1352451]	Nr2f1	2.78712	2.50671	1.657	4.0379	2.89212	2.60534
ENSMUSG00000040364	0.460654	0.545409	0.767901	0.380867	0.624818	secretory blood group 1 [Source:MGI Symbol;Acc:MGI:1928893]	Sec1	1.47098	1.12802	0.795362	1.61516	2.01191	1.0598
ENSMUSG00000021182	0.460488	3.77984	3.52287	0.0605274	0.234023	coiled-coil domain containing 88C [Source:MGI Symbol;Acc:MGI:1915589]	Ccdc88c	10.142	11.4682	11.9304	22.5546	13.2032	12.2319
ENSMUSG00000073591	0.460409	3.21327	3.97421	0.0462022	0.202166	protocadherin beta 22 [Source:MGI Symbol;Acc:MGI:2136760]	Pcdhb22	9.67751	5.8281	7.6885	12.6329	9.11646	9.89146
ENSMUSG00000033594	0.460379	2.34137	2.28823	0.130359	0.354064	spermatogenesis associated 2-like [Source:MGI Symbol;Acc:MGI:1926029]	Spata2l	5.72909	4.57474	2.45237	6.80675	5.09265	4.98989
ENSMUSG00000042604	0.46037	3.40808	3.94607	0.0469811	0.204026	potassium voltage-gated channel, shaker-related subfamily, member 4 [Source:MGI Symbol;Acc:MGI:96661]	Kcna4	10.2969	10.0268	5.56753	18.2859	12.2601	6.57959
ENSMUSG00000045659	0.460351	4.58053	5.1245	0.0235903	0.142691	pleckstrin homology domain containing, family A member 7 [Source:MGI Symbol;Acc:MGI:2445094]	Plekha7	31.5874	30.5192	1.9884	37.9563	36.906	4.32751
ENSMUSG00000054000	0.460103	1.02444	1.0457	0.306499	0.560077	tumor suppressor candidate 1 [Source:MGI Symbol;Acc:MGI:2684283]	Tusc1	1.62582	1.50403	1.59072	3.05727	2.13765	1.54554
ENSMUSG00000047821	0.459968	3.75897	4.06736	0.0437196	0.197046	tripartite motif-containing 16 [Source:MGI Symbol;Acc:MGI:2137356]	Trim16	16.4131	9.02415	9.08038	15.8632	13.3289	16.6918
ENSMUSG00000015854	0.459689	-1.85187	0.085887	0.769473	0.890446	CD5 antigen-like [Source:MGI Symbol;Acc:MGI:1334419]	Cd5l	0	0	0.331401	0	0	0.485741
ENSMUSG00000025737	0.459611	4.26488	6.09255	0.0135753	0.108454	WD repeat domain 24 [Source:MGI Symbol;Acc:MGI:2446285]	Wdr24	14.1679	15.8549	18.227	21.8047	22.7597	21.5934
ENSMUSG00000036822	0.459481	5.2093	4.64674	0.0311126	0.164968	topoisomerase I binding, arginine/serine-rich [Source:MGI Symbol;Acc:MGI:2146189]	Topors	25.8583	30.2685	35.3936	55.8961	29.2356	44.2466
ENSMUSG00000046345	0.459325	3.13972	2.75415	0.0970021	0.302744	single-pass membrane protein with coiled-coil domains 1 [Source:MGI Symbol;Acc:MGI:1916826]	Smco1	6.11619	8.02147	7.3571	13.0943	10.8769	6.62375
ENSMUSG00000039377	0.459249	2.82553	3.1106	0.0777843	0.267533	H2.0-like homeobox [Source:MGI Symbol;Acc:MGI:96109]	Hlx	6.19361	6.26677	4.97101	10.3255	7.2303	6.71206
ENSMUSG00000027316	0.459234	1.2753	1.13472	0.286771	0.541794	glial cell line derived neurotrophic factor family receptor alpha 4 [Source:MGI Symbol;Acc:MGI:1341873]	Gfra4	2.55486	1.88003	1.39188	2.01895	3.52084	2.42871
ENSMUSG00000026620	0.459185	3.55347	4.81959	0.028138	0.155884	MAP/microtubule affinity regulating kinase 1 [Source:MGI Symbol;Acc:MGI:2664902]	Mark1	8.90331	11.0922	9.27922	13.6712	14.8378	11.7903
ENSMUSG00000008496	0.459073	0.957625	0.917241	0.338201	0.587602	POU domain, class 2, transcription factor 2 [Source:MGI Symbol;Acc:MGI:101897]	Pou2f2	1.47098	1.31602	1.59072	3.40338	1.38319	1.67802
ENSMUSG00000024598	0.458729	2.19797	2.26735	0.132126	0.356562	fibrillin 2 [Source:MGI Symbol;Acc:MGI:95490]	Fbn2	4.49036	2.56938	4.17565	4.84548	3.96095	6.53543
ENSMUSG00000087006	0.458652	3.75465	5.30982	0.0212055	0.13619	predicted gene 13889 [Source:MGI Symbol;Acc:MGI:3652053]	Gm13889	10.2969	13.7242	9.6769	15.5171	18.673	12.276
ENSMUSG00000045216	0.45823	5.19752	6.90526	0.00859426	0.0846632	heparan sulfate 6-O-sulfotransferase 1 [Source:MGI Symbol;Acc:MGI:1354958]	Hs6st1	35.6132	29.1405	26.6446	55.6654	31.5618	40.6256
ENSMUSG00000059839	0.45809	4.44682	6.64476	0.0099448	0.0918877	zinc finger protein 874b [Source:MGI Symbol;Acc:MGI:3040702]	Zfp874b	21.1357	19.6777	13.9851	30.6304	24.583	20.0479
ENSMUSG00000029101	0.45782	5.47115	8.2737	0.00402235	0.0584266	regulator of G-protein signaling 12 [Source:MGI Symbol;Acc:MGI:1918979]	Rgs12	42.2714	38.102	30.9528	60.7416	53.8814	39.4334
ENSMUSG00000052384	0.457682	4.22667	5.13901	0.023394	0.142343	negative regulator of reactive oxygen species [Source:MGI Symbol;Acc:MGI:2445095]	Nrros	12.155	13.4109	22.0713	20.9394	19.5532	23.1831
ENSMUSG00000045822	0.457666	1.86753	0.894947	0.34414	0.593878	zinc finger SWIM-type containing 3 [Source:MGI Symbol;Acc:MGI:1914788]	Zswim3	1.31614	4.26141	3.18145	6.22991	3.77233	2.29623
ENSMUSG00000078879	0.457622	2.65298	1.71888	0.189837	0.432677	zinc finger protein 973 [Source:MGI Symbol;Acc:MGI:3615331]	Zfp973	4.56779	4.32407	5.63381	12.8636	4.58967	4.90157
ENSMUSG00000040061	0.457577	2.55969	2.31014	0.128532	0.35182	phospholipase C, beta 2 [Source:MGI Symbol;Acc:MGI:107465]	Plcb2	4.49036	6.26677	3.84425	6.69138	5.72137	7.37444
ENSMUSG00000044501	0.457572	4.0814	5.36101	0.0205919	0.133894	zinc finger protein 758 [Source:MGI Symbol;Acc:MGI:2385044]	Zfp758	12.9292	12.0322	17.6968	20.0741	18.6102	19.2972
ENSMUSG00000049811	0.457303	1.29237	0.977124	0.32291	0.574742	family with sequence similarity 161, member A [Source:MGI Symbol;Acc:MGI:1921123]	Fam161a	2.78712	2.56938	0.795362	3.17264	2.07478	2.51702
ENSMUSG00000037621	0.457202	3.63931	4.83769	0.0278442	0.155107	atonal bHLH transcription factor 8 [Source:MGI Symbol;Acc:MGI:1918343]	Atoh8	11.5356	9.27482	10.3397	13.8442	13.2032	15.632
ENSMUSG00000047419	0.457001	11.1202	12.7346	0.000358955	0.0169545	cardiomyopathy associated 5 [Source:MGI Symbol;Acc:MGI:1923719]	Cmya5	2015.94	1929.23	1637.05	3312.98	2237.56	2221.6
ENSMUSG00000068114	0.456845	2.7316	2.91954	0.0875126	0.285292	coiled-coil domain containing 134 [Source:MGI Symbol;Acc:MGI:1923707]	Ccdc134	6.81297	5.8281	3.97681	8.4796	7.10455	6.84454
ENSMUSG00000029535	0.456775	3.66684	3.25235	0.0713212	0.25442	TP53 regulated inhibitor of apoptosis 1 [Source:MGI Symbol;Acc:MGI:1916326]	Triap1	9.05815	11.1549	10.8699	20.4779	11.0655	12.6293
ENSMUSG00000087598	0.456692	3.27839	3.90276	0.0482069	0.207077	zinc finger protein 111 [Source:MGI Symbol;Acc:MGI:1929114]	Zfp111	10.8388	7.64546	5.76637	15.1133	9.17934	8.91998
ENSMUSG00000043456	0.456639	3.2208	3.79454	0.0514199	0.21494	zinc finger protein 536 [Source:MGI Symbol;Acc:MGI:1926102]	Zfp536	9.60009	9.52549	4.17565	14.7095	11.317	5.96137
ENSMUSG00000013707	0.456192	1.94144	1.71095	0.190863	0.433695	tumor necrosis factor, alpha-induced protein 8-like 2 [Source:MGI Symbol;Acc:MGI:1917019]	Tnfaip8l2	1.5484	2.1307	6.03149	3.40338	2.76638	6.04969
ENSMUSG00000068196	0.455921	7.49912	6.87647	0.0087338	0.0854075	collagen, type VIII, alpha 1 [Source:MGI Symbol;Acc:MGI:88463]	Col8a1	150.427	135.801	169.346	250.408	177.425	201.097
ENSMUSG00000029919	0.455749	2.42327	1.60854	0.204697	0.452113	hematopoietic prostaglandin D synthase [Source:MGI Symbol;Acc:MGI:1859384]	Hpgds	2.78712	2.50671	8.74898	6.9798	3.8352	6.3588
ENSMUSG00000026730	0.455522	2.94123	3.25065	0.071395	0.25442	phosphotriesterase related [Source:MGI Symbol;Acc:MGI:107372]	Pter	5.65167	5.95343	7.48966	8.65265	9.05359	8.39008
ENSMUSG00000034501	0.455474	3.52476	3.69881	0.0544512	0.221973	pecanex homolog 4 [Source:MGI Symbol;Acc:MGI:1914958]	Pcnx4	9.75493	11.7189	7.22454	17.1899	11.2541	11.0396
ENSMUSG00000025499	0.455178	5.21035	5.59679	0.0179934	0.125203	Harvey rat sarcoma virus oncogene [Source:MGI Symbol;Acc:MGI:96224]	Hras	25.3938	27.5111	41.4251	40.1483	46.7769	39.9633
ENSMUSG00000022526	0.455128	5.0486	5.68099	0.0171497	0.12225	zinc finger protein 251 [Source:MGI Symbol;Acc:MGI:1918841]	Zfp251	26.168	23.8137	32.8087	49.0894	31.0588	34.7084
ENSMUSG00000072115	0.455099	1.88213	1.83063	0.176054	0.416865	angiogenin, ribonuclease, RNase A family, 5 [Source:MGI Symbol;Acc:MGI:88022]	Ang	2.94196	2.31871	3.77797	4.09559	4.27531	3.88593
ENSMUSG00000020309	0.455047	3.55348	4.38718	0.0362101	0.178851	ChaC, cation transport regulator 2 [Source:MGI Symbol;Acc:MGI:1915294]	Chac2	8.59363	9.27482	11.4002	14.7672	11.3799	14.0423
ENSMUSG00000071661	0.455034	1.4557	1.38048	0.240019	0.492749	zinc finger and BTB domain containing 3 [Source:MGI Symbol;Acc:MGI:1922541]	Zbtb3	2.09034	1.88003	2.58493	3.74948	3.14361	2.25207
ENSMUSG00000087385	0.455006	1.75597	1.38944	0.238499	0.491015	FSHD region gene 2 family member 1 [Source:MGI Symbol;Acc:MGI:3035485]	Frg2f1	2.47744	3.00805	2.38609	5.94149	2.38914	3.1794
ENSMUSG00000017817	0.454547	9.22126	8.64923	0.003272	0.0531794	junctophilin 2 [Source:MGI Symbol;Acc:MGI:1891496]	Jph2	568.728	495.075	434.201	899.645	586.534	596.137
ENSMUSG00000037206	0.454513	4.24089	6.27921	0.0122162	0.103329	immunoglobulin superfamily containing leucine-rich repeat [Source:MGI Symbol;Acc:MGI:1349645]	Islr	17.1873	18.5496	11.8641	23.8236	24.6459	16.6035
ENSMUSG00000032403	0.454456	3.02908	2.65956	0.102929	0.311118	RIKEN cDNA 2300009A05 gene [Source:MGI Symbol;Acc:MGI:1916728]	2300009A05Rik	4.72263	7.58279	8.08618	10.4985	8.99072	8.16929
ENSMUSG00000027314	0.454443	4.74487	5.35819	0.0206252	0.134043	delta-like 4 (Drosophila) [Source:MGI Symbol;Acc:MGI:1859388]	Dll4	26.0906	28.3258	12.7258	45.9167	28.7326	18.3699
ENSMUSG00000070605	0.454371	3.027	2.81499	0.0933874	0.296755	zinc finger protein 992 [Source:MGI Symbol;Acc:MGI:3700963]	Zfp992	6.11619	5.51476	8.6827	11.1331	8.61349	7.99265
ENSMUSG00000051735	0.45434	1.61289	1.71549	0.190275	0.43311	Ras and Rab interactor-like [Source:MGI Symbol;Acc:MGI:2444024]	Rinl	2.78712	2.1307	2.45237	3.51874	2.82925	3.75346
ENSMUSG00000044162	0.454296	1.71587	1.78723	0.181265	0.422961	TNFAIP3 interacting protein 3 [Source:MGI Symbol;Acc:MGI:3041165]	Tnip3	3.01938	1.88003	3.11517	3.92253	3.08074	3.84177
ENSMUSG00000044674	0.453806	4.38409	6.14424	0.0131841	0.10696	frizzled class receptor 1 [Source:MGI Symbol;Acc:MGI:1196625]	Fzd1	19.2776	16.1683	16.57	30.8034	19.176	22.3883
ENSMUSG00000036103	0.453729	5.25544	6.0423	0.0139671	0.109894	collectin sub-family member 12 [Source:MGI Symbol;Acc:MGI:2152907]	Colec12	34.1423	27.6991	32.4773	63.3951	33.6366	36.9605
ENSMUSG00000074182	0.453676	2.91358	3.18497	0.0743183	0.260062	zinc finger, HIT type 6 [Source:MGI Symbol;Acc:MGI:1916996]	Znhit6	7.81943	7.20679	3.84425	11.3638	8.29913	5.96137
ENSMUSG00000034543	0.453278	5.56952	7.31428	0.00684089	0.0750665	microrchidia 2A [Source:MGI Symbol;Acc:MGI:1921772]	Morc2a	40.5681	41.862	37.0506	63.6258	47.8457	53.0341
ENSMUSG00000038976	0.453205	6.45726	5.9268	0.0149123	0.11366	protein phosphatase 1, regulatory subunit 9B [Source:MGI Symbol;Acc:MGI:2387581]	Ppp1r9b	73.0071	70.2505	75.0954	131.059	71.4857	105.273
ENSMUSG00000092417	0.453185	3.12068	3.57629	0.0586099	0.230442	G patch domain and ankyrin repeats 1 [Source:MGI Symbol;Acc:MGI:2148975]	Gpank1	7.97427	7.08145	6.49546	11.883	8.04764	9.80314
ENSMUSG00000043998	0.45315	5.29405	7.40431	0.00650679	0.0734341	mannoside acetylglucosaminyltransferase 2 [Source:MGI Symbol;Acc:MGI:2384966]	Mgat2	29.2648	29.0778	40.6297	47.4742	36.403	51.4886
ENSMUSG00000028992	0.45305	4.71234	6.61865	0.0100916	0.0930474	nicotinamide nucleotide adenylyltransferase 1 [Source:MGI Symbol;Acc:MGI:1913704]	Nmnat1	21.1357	19.3643	25.319	33.6876	24.4573	32.3239
ENSMUSG00000026639	0.453003	3.85041	5.27468	0.0216377	0.137291	laminin, beta 3 [Source:MGI Symbol;Acc:MGI:99915]	Lamb3	11.5356	14.7269	9.94202	17.8245	18.4844	13.2033
ENSMUSG00000048163	0.452899	2.84836	2.63931	0.104249	0.313329	selectin, platelet (p-selectin) ligand [Source:MGI Symbol;Acc:MGI:106689]	Selplg	3.4839	6.14144	8.28502	6.9798	6.0986	11.0396
ENSMUSG00000045624	0.452883	4.52534	5.2871	0.021484	0.136975	ESF1 nucleolar pre-rRNA processing protein homolog [Source:MGI Symbol;Acc:MGI:1913830]	Esf1	17.0324	18.0483	22.7341	31.3803	23.0741	24.9494
ENSMUSG00000048707	0.452846	2.39552	2.52146	0.112307	0.32619	taperin [Source:MGI Symbol;Acc:MGI:2139535]	Tprn	4.49036	4.44941	3.97681	6.22991	5.09265	6.40295
ENSMUSG00000040829	0.452686	1.28274	0.907397	0.340806	0.590758	zinc finger, MYND-type containing 15 [Source:MGI Symbol;Acc:MGI:3603821]	Zmynd15	2.94196	1.12802	1.45816	2.71116	1.00595	4.32751
ENSMUSG00000024371	0.452684	-0.42808	0.280299	0.596506	0.786655	complement component 2 (within H-2S) [Source:MGI Symbol;Acc:MGI:88226]	C2	0.696781	0.313339	0.463961	0.230737	0.88021	1.0598
ENSMUSG00000035529	0.452602	4.76562	6.82637	0.00898218	0.0870448	PR domain containing 4 [Source:MGI Symbol;Acc:MGI:1920093]	Prdm4	26.7099	21.5577	20.0829	37.8409	25.6518	30.4692
ENSMUSG00000031824	0.452529	5.34497	7.36174	0.00666261	0.0740416	RIKEN cDNA 6430548M08 gene [Source:MGI Symbol;Acc:MGI:2443793]	6430548M08Rik	38.1681	36.1593	27.8377	59.3572	42.3758	39.1243
ENSMUSG00000024544	0.452402	4.33512	5.01658	0.0251058	0.147241	low density lipoprotein receptor class A domain containing 4 [Source:MGI Symbol;Acc:MGI:1277150]	Ldlrad4	19.0453	17.9856	13.1235	32.4763	18.0443	19.5621
ENSMUSG00000021360	0.452144	4.26565	4.8875	0.0270518	0.152773	glucosaminyl (N-acetyl) transferase 2, I-branching enzyme [Source:MGI Symbol;Acc:MGI:1100870]	Gcnt2	12.8517	20.8057	15.1119	21.8624	20.8736	22.874
ENSMUSG00000103906	0.452134	2.88527	2.75274	0.0970878	0.302796	tigger transposable element derived 5 [Source:MGI Symbol;Acc:MGI:2145902]	Tigd5	5.96135	7.26946	5.10357	8.07581	7.29317	9.62651
ENSMUSG00000039646	0.45206	4.50685	5.53583	0.0186309	0.127858	vasorin [Source:MGI Symbol;Acc:MGI:2177651]	Vasn	19.897	22.5604	14.8468	31.9571	23.3884	22.874
ENSMUSG00000015355	0.451741	1.78394	1.74999	0.185878	0.427808	CD48 antigen [Source:MGI Symbol;Acc:MGI:88339]	Cd48	1.39356	1.81736	5.10357	2.07664	2.51489	6.53543
ENSMUSG00000056498	0.451657	1.25469	1.14684	0.284212	0.539909	transmembrane protein 154 [Source:MGI Symbol;Acc:MGI:2444725]	Tmem154	1.39356	2.38137	1.92212	3.05727	2.51489	2.20792
ENSMUSG00000039126	0.451488	8.89729	6.04159	0.0139727	0.109894	prune homolog 2 [Source:MGI Symbol;Acc:MGI:1925004]	Prune2	463.901	379.641	326.496	863.707	391.819	434.474
ENSMUSG00000030852	0.451083	10.0234	8.18325	0.00422788	0.059491	transforming, acidic coiled-coil containing protein 2 [Source:MGI Symbol;Acc:MGI:1928899]	Tacc2	1112.45	1107.65	413.787	1849.82	1146.03	613.933
ENSMUSG00000074676	0.450945	1.86977	1.21073	0.271187	0.52693	forkhead box S1 [Source:MGI Symbol;Acc:MGI:95546]	Foxs1	2.55486	1.9427	4.63961	4.55706	4.58967	2.91445
ENSMUSG00000051359	0.450788	3.60684	4.61847	0.0316294	0.166429	neurocalcin delta [Source:MGI Symbol;Acc:MGI:1196326]	Ncald	11.1485	11.0295	8.28502	17.0746	13.0774	11.6578
ENSMUSG00000039396	0.450628	0.1636	0.464043	0.495741	0.716529	nei like 3 (E. coli) [Source:MGI Symbol;Acc:MGI:2384588]	Neil3	0.464521	0.376006	1.92212	0.807581	0.943082	1.36891
ENSMUSG00000049892	0.450397	1.54916	1.40668	0.235609	0.488596	RAS, dexamethasone-induced 1 [Source:MGI Symbol;Acc:MGI:1270848]	Rasd1	2.40002	2.56938	1.92212	4.96085	2.57776	2.34039
ENSMUSG00000029715	0.450337	3.1558	2.81503	0.0933849	0.296755	processing of precursor 7, ribonuclease P family, (S. cerevisiae) [Source:MGI Symbol;Acc:MGI:1921347]	Pop7	6.27103	5.95343	10.2734	11.0754	9.9338	9.09661
ENSMUSG00000020431	0.450192	2.48983	2.49338	0.114326	0.329052	adenylate cyclase 1 [Source:MGI Symbol;Acc:MGI:99677]	Adcy1	1.5484	7.45746	5.03729	2.42274	9.17934	7.02117
ENSMUSG00000030878	0.450017	4.20246	5.36314	0.0205667	0.133894	cerebellar degeneration-related 2 [Source:MGI Symbol;Acc:MGI:1100885]	Cdr2	15.6389	14.1629	16.0398	26.5925	16.5983	20.4895
ENSMUSG00000029027	0.449827	2.66445	2.5339	0.111424	0.324851	DNA fragmentation factor, beta subunit [Source:MGI Symbol;Acc:MGI:1196287]	Dffb	8.28395	3.6974	3.91053	10.3832	6.91594	4.28336
ENSMUSG00000030815	0.449594	3.90184	4.39099	0.0361294	0.178851	phosphorylase kinase, gamma 2 (testis) [Source:MGI Symbol;Acc:MGI:1916211]	Phkg2	13.1614	15.8549	8.94782	14.8826	18.9874	16.9568
ENSMUSG00000044043	0.449544	2.65414	2.75883	0.0967187	0.302581	protocadherin beta 14 [Source:MGI Symbol;Acc:MGI:2136749]	Pcdhb14	5.65167	5.20142	4.63961	9.11412	6.28722	6.04969
ENSMUSG00000066152	0.449531	4.66138	6.67723	0.00976521	0.0911337	solute carrier family 31, member 2 [Source:MGI Symbol;Acc:MGI:1333844]	Slc31a2	20.4389	23.6257	19.7515	31.1495	29.1098	26.8483
ENSMUSG00000030583	0.449242	3.91298	4.83773	0.0278435	0.155107	signal-induced proliferation-associated 1 like 3 [Source:MGI Symbol;Acc:MGI:1921456]	Sipa1l3	14.555	16.983	6.62802	23.1891	18.5473	9.80314
ENSMUSG00000034265	0.44921	3.48325	3.73289	0.053351	0.219157	zinc finger, DHHC domain containing 14 [Source:MGI Symbol;Acc:MGI:2653229]	Zdhhc14	9.52267	11.2802	7.22454	15.7478	11.317	11.1279
ENSMUSG00000020224	0.449068	3.15463	2.55417	0.110004	0.322516	LLP homolog, long-term synaptic facilitation (Aplysia) [Source:MGI Symbol;Acc:MGI:1913475]	Llph	5.72909	6.45478	9.94202	13.152	7.60753	9.58235
ENSMUSG00000021900	0.448942	4.04169	4.89473	0.0269388	0.152499	biotinidase [Source:MGI Symbol;Acc:MGI:1347001]	Btd	12.7743	14.8523	13.5212	22.9584	17.2898	16.5152
ENSMUSG00000040350	0.448841	4.38715	5.38478	0.0203132	0.133417	tripartite motif-containing 7 [Source:MGI Symbol;Acc:MGI:2137353]	Trim7	17.4195	15.4163	19.0887	30.1112	16.6611	25.8326
ENSMUSG00000032531	0.448761	6.79421	5.78752	0.0161403	0.117942	angiomotin-like 2 [Source:MGI Symbol;Acc:MGI:1929286]	Amotl2	97.1622	93.3749	85.3688	179.398	101.287	108.409
ENSMUSG00000031921	0.448735	3.97818	5.55478	0.0184303	0.126891	telomeric repeat binding factor 2 [Source:MGI Symbol;Acc:MGI:1195972]	Terf2	16.1034	11.0295	12.3944	23.0737	15.8438	15.3229
ENSMUSG00000019564	0.448517	2.56412	2.50351	0.113593	0.328034	AT rich interactive domain 3A (BRIGHT-like) [Source:MGI Symbol;Acc:MGI:1328360]	Arid3a	5.49683	4.57474	4.44077	6.86444	5.09265	8.03681
ENSMUSG00000030789	0.44847	1.80911	1.69507	0.192934	0.436584	integrin alpha X [Source:MGI Symbol;Acc:MGI:96609]	Itgax	3.01938	1.7547	3.91053	3.57643	3.52084	4.37167
ENSMUSG00000033152	0.448125	3.531	4.61393	0.0317132	0.166736	podocalyxin-like 2 [Source:MGI Symbol;Acc:MGI:2442488]	Podxl2	9.98719	10.4655	8.55014	13.6135	13.6433	12.2319
ENSMUSG00000030882	0.448105	1.64584	1.45198	0.22821	0.480128	dynein heavy chain domain 1 [Source:MGI Symbol;Acc:MGI:1924755]	Dnhd1	2.7097	2.88272	1.85584	5.24927	2.57776	2.69366
ENSMUSG00000090958	0.447988	4.11908	5.22048	0.0223224	0.139057	leucine rich repeat containing 32 [Source:MGI Symbol;Acc:MGI:93882]	Lrrc32	15.0195	16.8576	11.0688	20.1895	28.041	12.4085
ENSMUSG00000034758	0.447972	2.10381	2.17028	0.140701	0.368471	transducin-like enhancer of split 6 [Source:MGI Symbol;Acc:MGI:2149593]	Tle6	3.94842	3.8854	2.78377	5.01854	4.77828	4.54831
ENSMUSG00000040374	0.447913	4.97384	7.42255	0.00644116	0.0733206	peroxisomal biogenesis factor 2 [Source:MGI Symbol;Acc:MGI:107486]	Pex2	25.1615	27.0725	27.1086	37.4371	35.4599	35.3708
ENSMUSG00000028838	0.447772	5.28545	5.83826	0.0156814	0.11634	exostoses (multiple)-like 1 [Source:MGI Symbol;Acc:MGI:1888742]	Extl1	51.0198	34.0286	15.6421	68.4136	35.7743	28.5263
ENSMUSG00000029127	0.447729	2.56074	1.30642	0.253045	0.507453	zinc finger and BTB domain containing 49 [Source:MGI Symbol;Acc:MGI:1922329]	Zbtb49	3.63874	5.07609	4.77217	12.2868	5.28126	3.53266
ENSMUSG00000003923	0.447659	5.34517	6.98617	0.00821422	0.0824407	transcription factor A, mitochondrial [Source:MGI Symbol;Acc:MGI:107810]	Tfam	29.5745	36.4726	36.8518	48.7433	43.3818	47.8676
ENSMUSG00000031539	0.447141	2.72999	2.85454	0.0911163	0.292743	adaptor-related protein complex 3, mu 2 subunit [Source:MGI Symbol;Acc:MGI:1929214]	Ap3m2	5.80651	6.07877	4.63961	7.44128	7.35604	7.59523
ENSMUSG00000043366	0.446753	0.810055	0.821332	0.364791	0.61224	olfactory receptor 78 [Source:MGI Symbol;Acc:MGI:2157548]	Olfr78	1.9355	0.689345	1.39188	3.40338	1.00595	1.36891
ENSMUSG00000050382	0.446562	1.78205	1.59974	0.205941	0.453599	kinesin family member 7 [Source:MGI Symbol;Acc:MGI:1098239]	Kif7	3.79358	2.00537	2.25353	6.9798	2.76638	2.16376
ENSMUSG00000056383	0.44653	3.99271	4.15721	0.0414575	0.191121	expressed sequence AI987944 [Source:MGI Symbol;Acc:MGI:2142079]	AI987944	10.5291	13.4109	16.1724	20.8817	16.4725	17.0893
ENSMUSG00000029627	0.446219	2.99112	3.0462	0.0809265	0.272774	zinc finger with KRAB and SCAN domains 14 [Source:MGI Symbol;Acc:MGI:1914485]	Zkscan14	6.19361	5.70276	7.82106	11.0177	7.35604	8.69919
ENSMUSG00000035357	0.44621	5.91543	5.87318	0.0153732	0.115361	PDZ domain containing RING finger 3 [Source:MGI Symbol;Acc:MGI:1933157]	Pdzrn3	53.3424	59.2837	38.7076	95.9867	61.7405	52.2393
ENSMUSG00000007476	0.446167	6.72787	7.56618	0.00594738	0.069649	leucine rich repeat containing 8A [Source:MGI Symbol;Acc:MGI:2652847]	Lrrc8a	95.8461	79.8387	92.5271	143.173	111.284	112.427
ENSMUSG00000056069	0.446153	2.48691	2.12853	0.144579	0.373555	family with sequence similarity 105, member A [Source:MGI Symbol;Acc:MGI:2687281]	Fam105a	3.25164	4.44941	6.09777	7.03749	4.46392	7.28612
ENSMUSG00000037336	0.446008	0.967979	0.856426	0.354741	0.60236	major facilitator superfamily domain containing 2B [Source:MGI Symbol;Acc:MGI:3583946]	Mfsd2b	1.5484	1.88003	1.12676	2.99959	1.44606	1.89881
ENSMUSG00000043051	0.445991	2.37231	2.29455	0.129829	0.353569	disrupted in schizophrenia 1 [Source:MGI Symbol;Acc:MGI:2447658]	Disc1	5.34199	4.95075	2.65121	7.61433	5.15552	4.59246
ENSMUSG00000026039	0.445798	4.50985	6.23668	0.0125131	0.104308	shugoshin 2A [Source:MGI Symbol;Acc:MGI:1098767]	Sgo2a	20.4389	15.1656	22.1376	28.323	23.4513	26.2742
ENSMUSG00000067916	0.44546	3.10407	2.63989	0.104211	0.313329	zinc finger protein 991 [Source:MGI Symbol;Acc:MGI:3701604]	Zfp991	7.81943	7.20679	5.50125	14.9979	10.6883	4.72494
ENSMUSG00000049191	0.445432	2.00988	0.778532	0.37759	0.622366	retrotransposon gag domain containing 4 [Source:MGI Symbol;Acc:MGI:3045324]	Rgag4	2.3226	2.88272	3.24773	8.24886	1.06883	5.25484
ENSMUSG00000021091	0.445293	7.60323	5.8718	0.0153853	0.11537	serine (or cysteine) peptidase inhibitor, clade A, member 3N [Source:MGI Symbol;Acc:MGI:105045]	Serpina3n	138.814	241.208	108.037	244.812	314.487	118.609
ENSMUSG00000036959	0.445054	3.9009	4.99659	0.0253974	0.148486	BCL6 co-repressor-like 1 [Source:MGI Symbol;Acc:MGI:2443910]	Bcorl1	16.6453	14.7896	5.76637	26.0733	18.4215	7.37444
ENSMUSG00000010607	0.444809	3.34231	3.41512	0.0646017	0.241878	phosphatidylinositol glycan anchor biosynthesis, class Y-like [Source:MGI Symbol;Acc:MGI:1913518]	Pigyl	9.05815	8.39748	7.42338	16.1516	11.4427	7.63939
ENSMUSG00000007682	0.444689	3.10903	3.59357	0.0580036	0.229318	deiodinase, iodothyronine, type II [Source:MGI Symbol;Acc:MGI:1338833]	Dio2	7.35491	7.26946	6.89314	10.9023	9.43082	9.05245
ENSMUSG00000028807	0.444662	1.91952	1.7381	0.18738	0.429731	zinc finger and BTB domain containing 8a [Source:MGI Symbol;Acc:MGI:1920930]	Zbtb8a	3.94842	2.00537	3.31401	5.99917	3.58371	3.13524
ENSMUSG00000031949	0.444534	2.92518	3.04945	0.0807646	0.272656	adenosine deaminase, tRNA-specific 1 [Source:MGI Symbol;Acc:MGI:1353631]	Adat1	9.98719	5.95343	3.44657	11.5369	9.11646	4.98989
ENSMUSG00000014905	0.444236	4.94875	6.00565	0.0142601	0.111225	DnaJ heat shock protein family (Hsp40) member B9 [Source:MGI Symbol;Acc:MGI:1351618]	Dnajb9	27.3293	27.6991	22.0713	48.1664	31.3732	27.8197
ENSMUSG00000046731	0.444219	3.86511	4.43062	0.0352996	0.176525	potassium channel tetramerisation domain containing 11 [Source:MGI Symbol;Acc:MGI:2448712]	Kctd11	11.8453	11.7815	12.5932	20.1318	12.3229	17.7516
ENSMUSG00000079362	0.443983	4.93964	4.84569	0.0277154	0.154893	predicted gene 43302 [Source:MGI Symbol;Acc:MGI:5663439]	Gm43302	30.6584	19.8657	27.1086	27.9769	33.8252	43.7167
ENSMUSG00000010045	0.443893	4.9085	5.92986	0.0148864	0.11366	transmembrane protein 115 [Source:MGI Symbol;Acc:MGI:1930765]	Tmem115	22.3744	24.8164	28.6993	39.1677	31.8762	32.3239
ENSMUSG00000049969	0.443855	3.83866	4.4902	0.0340896	0.173386	pleckstrin homology domain containing, family F (with FYVE domain) member 2 [Source:MGI Symbol;Acc:MGI:1919051]	Plekhf2	8.59363	11.9695	15.7747	15.2287	15.2151	18.0166
ENSMUSG00000005267	0.443831	2.70055	1.55069	0.213034	0.461316	zinc finger protein 287 [Source:MGI Symbol;Acc:MGI:2176561]	Zfp287	4.95489	4.70008	5.10357	13.3828	3.20648	6.6679
ENSMUSG00000032827	0.443755	5.11665	4.24486	0.0393692	0.186754	protein phosphatase 1, regulatory (inhibitor) subunit 9A [Source:MGI Symbol;Acc:MGI:2442401]	Ppp1r9a	30.8132	28.4511	24.7888	65.1833	26.2806	31.7498
ENSMUSG00000048310	0.443577	5.19321	6.57642	0.0103339	0.0943217	protein serine kinase H1 [Source:MGI Symbol;Acc:MGI:3528383]	Pskh1	34.5294	32.2739	25.9155	46.7243	36.2144	42.9219
ENSMUSG00000075289	0.443565	5.3742	6.25479	0.0123858	0.103958	carnosine synthase 1 [Source:MGI Symbol;Acc:MGI:2147595]	Carns1	34.839	34.7179	34.3331	61.7222	42.6273	39.7425
ENSMUSG00000000295	0.443279	0.835814	0.848172	0.35707	0.604251	HD domain containing 2 [Source:MGI Symbol;Acc:MGI:1916942]	Hddc2	1.62582	1.37869	1.19304	1.49979	2.38914	1.85465
ENSMUSG00000031907	0.443074	3.30065	3.17072	0.0749695	0.261494	zinc finger protein 90 [Source:MGI Symbol;Acc:MGI:104786]	Zfp90	8.82589	6.51744	9.21294	14.4211	10.6254	8.74334
ENSMUSG00000052763	0.442993	3.60984	4.47282	0.0344381	0.174211	Zinc finger protein 212 [Source:MGI Symbol;Acc:MGI:2682609]	Zfp212	12.8517	9.77616	7.88734	19.2666	11.5685	11.1279
ENSMUSG00000054150	0.442945	4.58327	5.96875	0.0145616	0.112293	spectrin repeat containing, nuclear envelope family member 3 [Source:MGI Symbol;Acc:MGI:2442408]	Syne3	20.1292	21.7457	18.2933	32.9378	28.3553	21.5493
ENSMUSG00000039298	0.442709	4.8053	5.82276	0.0158201	0.117045	CDK5 regulatory subunit associated protein 2 [Source:MGI Symbol;Acc:MGI:2384875]	Cdk5rap2	25.7809	24.1897	19.9503	43.3209	26.0919	27.5548
ENSMUSG00000042507	0.442481	5.32226	6.35918	0.0116776	0.101229	ELM2 and Myb/SANT-like domain containing 1 [Source:MGI Symbol;Acc:MGI:2685106]	Elmsan1	37.5487	41.4234	22.9329	58.3765	44.1363	34.8409
ENSMUSG00000070802	0.442446	3.34231	3.0269	0.0818946	0.274	PNMA-like 2 [Source:MGI Symbol;Acc:MGI:3645856]	Pnmal2	9.98719	11.3429	4.10937	17.9398	10.5625	6.22632
ENSMUSG00000020604	0.442335	1.91474	1.71816	0.18993	0.432776	arylsulfatase G [Source:MGI Symbol;Acc:MGI:1921258]	Arsg	3.4839	3.6974	2.12096	5.07622	3.52084	3.88593
ENSMUSG00000074305	0.441795	6.85097	5.40797	0.020045	0.132527	pseudopodium-enriched atypical kinase 1 [Source:MGI Symbol;Acc:MGI:2442366]	Peak1	111.33	134.485	51.8974	179.168	133.603	81.4279
ENSMUSG00000036206	0.441279	4.86037	6.12377	0.0133376	0.107406	SH3-domain binding protein 4 [Source:MGI Symbol;Acc:MGI:2138297]	Sh3bp4	27.1745	28.4511	17.2991	45.5129	32.442	22.6532
ENSMUSG00000070047	0.441232	7.87738	6.34964	0.0117405	0.101467	FAT atypical cadherin 1 [Source:MGI Symbol;Acc:MGI:109168]	Fat1	213.602	208.12	172.13	344.491	230.678	240.928
ENSMUSG00000025821	0.440969	4.32609	5.20366	0.0225394	0.139561	zinc finger protein 282 [Source:MGI Symbol;Acc:MGI:2141413]	Zfp282	17.4969	17.4216	15.2444	29.8805	19.5532	19.8712
ENSMUSG00000041144	0.44092	2.66377	2.71325	0.099518	0.305717	dynein, axonemal, heavy chain 7B [Source:MGI Symbol;Acc:MGI:2684953]	Dnah7b	6.73555	4.13607	4.77217	9.97939	5.09265	6.49127
ENSMUSG00000049577	0.440655	4.70353	5.77064	0.0162961	0.118815	zinc finger protein, multitype 1 [Source:MGI Symbol;Acc:MGI:1095400]	Zfpm1	26.3228	23.0617	15.2444	44.4169	28.3553	18.2374
ENSMUSG00000067071	0.44043	3.96951	5.24809	0.0219708	0.138084	hairy and enhancer of split 6 [Source:MGI Symbol;Acc:MGI:1859852]	Hes6	11.3033	14.4762	13.72	17.1899	19.9305	16.471
ENSMUSG00000057551	0.440322	5.30446	5.85854	0.0155016	0.115767	zinc finger protein 317 [Source:MGI Symbol;Acc:MGI:107775]	Zfp317	32.3616	28.0125	39.2379	57.7997	36.4659	42.3037
ENSMUSG00000020697	0.439776	5.37641	6.83545	0.00893662	0.086761	ligase III, DNA, ATP-dependent [Source:MGI Symbol;Acc:MGI:109152]	Lig3	34.9939	38.0393	32.2784	51.5121	42.6902	48.7508
ENSMUSG00000032565	0.439766	2.46028	2.27822	0.131203	0.354875	nudix (nucleoside diphosphate linked moiety X)-type motif 16 [Source:MGI Symbol;Acc:MGI:1922936]	Nudt16	3.4839	4.32407	5.89893	6.46065	5.59562	6.31464
ENSMUSG00000009569	0.439713	6.14285	6.95084	0.00837798	0.0833916	MKL/myocardin-like 2 [Source:MGI Symbol;Acc:MGI:3050795]	Mkl2	62.478	72.0679	44.7391	99.5632	84.6259	59.702
ENSMUSG00000043987	0.439673	4.40635	5.71511	0.0168195	0.121282	centrosomal protein 164 [Source:MGI Symbol;Acc:MGI:2384878]	Cep164	20.9808	18.2363	14.0514	32.6493	20.8107	19.6946
ENSMUSG00000004709	0.439618	0.513579	0.313969	0.575255	0.772701	CD244 natural killer cell receptor 2B4 [Source:MGI Symbol;Acc:MGI:109294]	Cd244	0	1.62936	2.18725	0.865265	0.754466	2.1196
ENSMUSG00000047434	0.439476	4.35126	3.96374	0.0464902	0.202768	xyloside xylosyltransferase 1 [Source:MGI Symbol;Acc:MGI:2146443]	Xxylt1	13.3163	17.923	20.1492	28.0923	18.2329	23.713
ENSMUSG00000032641	0.439382	1.22008	1.1433	0.284957	0.540018	G protein-coupled receptor 19 [Source:MGI Symbol;Acc:MGI:892973]	Gpr19	1.47098	1.31602	2.85005	2.07664	2.20053	3.13524
ENSMUSG00000015981	0.439304	-0.0228582	0.412733	0.520585	0.733962	serine/threonine kinase 32C [Source:MGI Symbol;Acc:MGI:2385336]	Stk32c	1.00646	1.19069	0.19884	1.03832	1.06883	0.706533
ENSMUSG00000034275	0.438532	3.0036	2.45522	0.117135	0.333614	immunoglobulin superfamily, member 9B [Source:MGI Symbol;Acc:MGI:2685354]	Igsf9b	7.04523	9.14949	4.10937	12.1137	7.85902	7.02117
ENSMUSG00000051483	0.438429	4.2091	5.39922	0.0201457	0.132839	carbonyl reductase 1 [Source:MGI Symbol;Acc:MGI:88284]	Cbr1	17.9615	13.0976	15.7084	24.6312	20.4963	18.2815
ENSMUSG00000029561	0.438368	3.24109	3.62991	0.0567497	0.22694	2'-5' oligoadenylate synthetase-like 2 [Source:MGI Symbol;Acc:MGI:1344390]	Oasl2	6.58071	6.2041	10.9362	9.9217	8.17338	13.8216
ENSMUSG00000034216	0.437887	4.95072	6.60243	0.010184	0.0935699	VPS18 CORVET/HOPS core subunit [Source:MGI Symbol;Acc:MGI:2443626]	Vps18	28.3358	26.4458	23.2643	43.4363	30.3673	32.8096
ENSMUSG00000074743	0.437731	6.70645	6.42724	0.0112383	0.099221	thrombomodulin [Source:MGI Symbol;Acc:MGI:98736]	Thbd	94.9944	91.6202	76.3547	158.92	102.859	100.99
ENSMUSG00000058709	0.437674	6.00245	6.66746	0.00981889	0.0913038	egl-9 family hypoxia-inducible factor 2 [Source:MGI Symbol;Acc:MGI:1932287]	Egln2	48.5424	58.0303	56.4044	80.3543	69.6624	70.6974
ENSMUSG00000054720	0.437595	5.39634	3.28818	0.0697804	0.251655	leucine rich repeat containing 8 family, member C [Source:MGI Symbol;Acc:MGI:2140839]	Lrrc8c	22.3744	52.2649	35.0622	54.7424	45.5194	41.7296
ENSMUSG00000061118	0.437168	4.61259	5.69226	0.0170399	0.122145	DnaJ heat shock protein family (Hsp40) member C30 [Source:MGI Symbol;Acc:MGI:1913364]	Dnajc30	19.1228	20.6177	21.9387	31.1495	23.137	29.8069
ENSMUSG00000026637	0.437004	2.72401	2.74339	0.0976571	0.303488	TNF receptor-associated factor 5 [Source:MGI Symbol;Acc:MGI:107548]	Traf5	5.96135	5.6401	4.77217	9.51791	6.85307	6.09385
ENSMUSG00000007038	0.436744	4.84193	6.23057	0.0125563	0.104386	neuraminidase 1 [Source:MGI Symbol;Acc:MGI:97305]	Neu1	20.9034	26.2578	25.5841	33.1108	29.8643	35.3266
ENSMUSG00000051427	0.436736	4.23894	5.19624	0.0226357	0.139893	coiled-coil domain containing 157 [Source:MGI Symbol;Acc:MGI:3041210]	Ccdc157	18.3486	16.7323	12.9246	22.6699	20.182	21.5493
ENSMUSG00000075028	0.436617	4.12238	4.68424	0.0304405	0.162813	PR domain containing 11 [Source:MGI Symbol;Acc:MGI:2685553]	Prdm11	18.426	17.9856	8.48386	24.6889	19.3018	14.8813
ENSMUSG00000070420	0.436579	3.33194	2.23641	0.134793	0.360274	zinc finger and SCAN domain containing 25 [Source:MGI Symbol;Acc:MGI:3647079]	Zscan25	7.27749	9.08682	7.88734	18.459	8.99072	7.86018
ENSMUSG00000057110	0.436557	5.18961	6.38937	0.0114806	0.100093	centriolin [Source:MGI Symbol;Acc:MGI:1889576]	Cntrl	33.0584	29.2658	29.2958	54.1656	32.6935	39.5658
ENSMUSG00000031530	0.436492	1.69689	1.44985	0.228551	0.480609	dual specificity phosphatase 4 [Source:MGI Symbol;Acc:MGI:2442191]	Dusp4	3.63874	2.94538	1.52444	4.38401	3.01786	3.1794
ENSMUSG00000026200	0.436466	2.08446	1.89381	0.168773	0.406855	galactosidase, beta 1-like [Source:MGI Symbol;Acc:MGI:1921827]	Glb1l	4.41294	4.01073	2.18725	5.94149	4.14956	3.97425
ENSMUSG00000020399	0.436269	1.84632	1.51993	0.217629	0.466751	hepatitis A virus cellular receptor 2 [Source:MGI Symbol;Acc:MGI:2159682]	Havcr2	4.56779	1.44136	3.18145	4.26864	3.01786	4.32751
ENSMUSG00000050002	0.436042	3.00087	2.05891	0.151319	0.382608	idnK gluconokinase homolog (E. coli) [Source:MGI Symbol;Acc:MGI:1922981]	Idnk	4.18068	6.89345	9.14666	10.6716	7.16743	8.96414
ENSMUSG00000056130	0.435882	0.465919	0.463067	0.496194	0.716787	toll-like receptor adaptor molecule 2 [Source:MGI Symbol;Acc:MGI:3040056]	Ticam2	1.47098	0.752013	0.596521	3.05727	0.314361	1.28059
ENSMUSG00000044881	0.435867	3.09537	2.62371	0.105278	0.31492	cytochrome c oxidase assembly factor 4 [Source:MGI Symbol;Acc:MGI:1915435]	Coa4	5.65167	6.51744	9.0141	11.7676	6.60158	10.6863
ENSMUSG00000026579	0.435769	0.560283	0.61344	0.433495	0.670008	coagulation factor V [Source:MGI Symbol;Acc:MGI:88382]	F5	1.23872	0.501342	1.85584	1.67285	1.25744	1.54554
ENSMUSG00000099481	0.435727	3.38542	1.53259	0.215724	0.464688	Xrcc1 N-terminal domain containing 1 [Source:MGI Symbol;Acc:MGI:5546359]	Xndc1	9.83235	8.02147	6.29661	19.555	4.21243	13.6891
ENSMUSG00000039328	0.435351	3.46557	4.07471	0.0435297	0.196499	ring finger protein 122 [Source:MGI Symbol;Acc:MGI:1916117]	Rnf122	9.05815	10.7788	7.95362	13.8442	13.5804	10.2447
ENSMUSG00000048154	0.435045	7.9536	4.35936	0.0368062	0.180006	lysine (K)-specific methyltransferase 2D [Source:MGI Symbol;Acc:MGI:2682319]	Kmt2d	324.545	283.446	59.3207	437.536	265.069	117.02
ENSMUSG00000045176	0.434926	4.11646	4.94349	0.0261891	0.150415	BLOC-1 related complex subunit 6 [Source:MGI Symbol;Acc:MGI:1919173]	Borcs6	13.9356	14.8523	14.8468	23.4198	19.2389	16.9126
ENSMUSG00000074867	0.434539	1.80844	1.51053	0.219059	0.468819	zinc finger protein 80 [Source:MGI Symbol;Acc:MGI:3704127]	Zfp808	2.47744	3.19605	2.78377	5.07622	3.01786	3.57682
ENSMUSG00000018572	0.434191	4.40685	3.99606	0.0456067	0.200907	PHD finger protein 23 [Source:MGI Symbol;Acc:MGI:1925496]	Phf23	11.613	22.5604	20.4806	24.2851	23.3256	23.978
ENSMUSG00000026933	0.433943	6.23578	6.67715	0.00976565	0.0911337	calmodulin regulated spectrin-associated protein 1 [Source:MGI Symbol;Acc:MGI:3036242]	Camsap1	72.4652	66.3025	51.102	117.042	79.3447	65.1335
ENSMUSG00000001493	0.433618	4.487	6.09318	0.0135704	0.108454	mesenchyme homeobox 1 [Source:MGI Symbol;Acc:MGI:103220]	Meox1	18.8905	13.4109	24.8551	26.0156	19.4275	30.9108
ENSMUSG00000053950	0.433567	4.836	5.14925	0.0232564	0.141921	ADNP homeobox 2 [Source:MGI Symbol;Acc:MGI:2448562]	Adnp2	23.768	25.6311	22.2039	43.494	27.2865	28.0847
ENSMUSG00000032089	0.43356	3.52626	3.71751	0.0538447	0.220598	interleukin 10 receptor, alpha [Source:MGI Symbol;Acc:MGI:96538]	Il10ra	9.21299	9.02415	10.5385	16.44	10.814	12.1877
ENSMUSG00000033618	0.433267	1.54697	1.0083	0.31531	0.568103	mitogen-activated protein kinase kinase kinase 13 [Source:MGI Symbol;Acc:MGI:2444243]	Map3k13	3.0968	2.69471	0.927922	6.80675	1.76042	1.54554
ENSMUSG00000021967	0.43272	4.62599	5.64352	0.01752	0.123578	mitochondrial ribosomal protein L57 [Source:MGI Symbol;Acc:MGI:1915090]	Mrpl57	17.4969	22.8111	22.469	28.8998	29.3613	26.1859
ENSMUSG00000029683	0.432572	8.84893	7.10297	0.00769561	0.0797175	leiomodin 2 (cardiac) [Source:MGI Symbol;Acc:MGI:2135672]	Lmod2	412.726	346.177	407.159	671.849	416.465	511.265
ENSMUSG00000021811	0.432535	3.65487	4.4848	0.0341975	0.173502	DnaJ heat shock protein family (Hsp40) member C9 [Source:MGI Symbol;Acc:MGI:1915326]	Dnajc9	10.9162	9.14949	11.6653	13.7289	12.5744	16.5594
ENSMUSG00000041075	0.432342	3.85914	4.92987	0.0263962	0.150957	frizzled class receptor 7 [Source:MGI Symbol;Acc:MGI:108570]	Fzd7	15.3292	13.4736	8.0199	20.4779	18.1072	10.9954
ENSMUSG00000021203	0.432329	2.46331	2.33411	0.126568	0.348746	OTU domain, ubiquitin aldehyde binding 2 [Source:MGI Symbol;Acc:MGI:1915399]	Otub2	3.4839	4.70008	5.56753	5.99917	5.84711	6.53543
ENSMUSG00000036887	0.431891	6.20448	5.92811	0.0149013	0.11366	complement component 1, q subcomponent, alpha polypeptide [Source:MGI Symbol;Acc:MGI:88223]	C1qa	48.5424	51.5129	90.5387	84.0461	66.0786	100.637
ENSMUSG00000043421	0.431655	1.76495	1.66848	0.196462	0.441312	hypoxia inducible lipid droplet associated [Source:MGI Symbol;Acc:MGI:1916823]	Hilpda	3.17422	2.56938	2.58493	3.63411	3.45797	4.10672
ENSMUSG00000074406	0.431462	3.06968	2.60694	0.106397	0.31633	zinc finger protein 628 [Source:MGI Symbol;Acc:MGI:2665174]	Zfp628	11.3808	8.39748	2.58493	11.5369	10.6254	5.34316
ENSMUSG00000047030	0.431225	3.952	5.06001	0.0244841	0.144827	spermatogenesis associated 2 [Source:MGI Symbol;Acc:MGI:2146885]	Spata2	11.7679	13.5362	13.8526	17.8245	18.2329	16.736
ENSMUSG00000010047	0.431095	4.27058	5.0377	0.0248014	0.146029	hyaluronoglucosaminidase 2 [Source:MGI Symbol;Acc:MGI:1196334]	Hyal2	20.3615	13.0976	15.9072	22.9007	21.628	21.1077
ENSMUSG00000028036	0.430984	3.50498	2.95026	0.0858635	0.282375	prostaglandin F receptor [Source:MGI Symbol;Acc:MGI:97796]	Ptgfr	7.35491	10.0268	11.2013	14.3634	14.3977	9.93562
ENSMUSG00000063919	0.430906	3.51485	1.98366	0.159006	0.393074	serine/arginine repetitive matrix 4 [Source:MGI Symbol;Acc:MGI:1916205]	Srrm4	12.7743	15.4789	2.51865	20.5933	10.5625	6.04969
ENSMUSG00000059493	0.430874	1.54611	1.28903	0.256227	0.510047	NHS actin remodeling regulator [Source:MGI Symbol;Acc:MGI:2684894]	Nhs	2.55486	2.44404	1.9884	3.80717	2.13765	3.66514
ENSMUSG00000023143	0.430814	3.66759	4.02634	0.0447951	0.199831	N-acetylglucosamine-1-phosphodiester alpha-N-acetylglucosaminidase [Source:MGI Symbol;Acc:MGI:1351598]	Nagpa	10.9162	9.08682	12.1293	12.6329	15.5294	15.058
ENSMUSG00000047216	0.430789	3.37489	3.20149	0.0735713	0.258759	cadherin 19, type 2 [Source:MGI Symbol;Acc:MGI:3588198]	Cdh19	8.59363	10.0895	7.15826	15.9209	10.8769	8.7875
ENSMUSG00000057101	0.430478	5.0305	5.29963	0.02133	0.136324	zinc finger protein 180 [Source:MGI Symbol;Acc:MGI:1923701]	Zfp180	25.4712	26.5711	30.4226	47.0704	31.499	34.1344
ENSMUSG00000025141	0.430454	5.18224	6.10857	0.0134528	0.107869	myeloid-associated differentiation marker-like 2 [Source:MGI Symbol;Acc:MGI:1915765]	Myadml2	32.3616	26.5711	32.6098	54.2233	34.5168	36.6956
ENSMUSG00000074576	0.430435	3.24497	2.8233	0.0929051	0.296273	molybdenum cofactor synthesis 3 [Source:MGI Symbol;Acc:MGI:1916622]	Mocs3	7.58717	8.27214	7.62222	13.4981	7.60753	11.3045
ENSMUSG00000025575	0.430358	4.99629	5.88097	0.0153054	0.115109	calcium activated nucleotidase 1 [Source:MGI Symbol;Acc:MGI:1923275]	Cant1	25.4712	28.6391	26.5783	43.6094	36.2772	30.0718
ENSMUSG00000091956	0.430256	-0.356982	0.346015	0.556378	0.759656	C2 calcium-dependent domain containing 4B [Source:MGI Symbol;Acc:MGI:1922947]	C2cd4b	0.3871	0.501342	0.795362	0.865265	0.817338	0.574058
ENSMUSG00000048489	0.430016	5.47324	5.82929	0.0157615	0.116803	RIKEN cDNA 8430408G22 gene [Source:MGI Symbol;Acc:MGI:1918730]	8430408G22Rik	34.2197	33.8406	44.6065	60.857	40.1753	51.8419
ENSMUSG00000032103	0.429987	2.95465	2.2323	0.135153	0.360719	pseudouridine synthase 3 [Source:MGI Symbol;Acc:MGI:1914299]	Pus3	5.65167	6.64278	6.6943	12.6329	6.85307	7.15365
ENSMUSG00000048222	0.429912	5.93972	5.35282	0.0206887	0.134257	microfibrillar-associated protein 1B [Source:MGI Symbol;Acc:MGI:3694697]	Mfap1b	45.2133	48.1915	62.701	84.6806	57.0879	69.4169
ENSMUSG00000025746	0.429893	-0.769169	0.281018	0.596034	0.786626	interleukin 6 [Source:MGI Symbol;Acc:MGI:96559]	Il6	0.30968	0.501342	0.331401	0.288422	0.628722	0.662375
ENSMUSG00000041378	0.429687	3.91044	4.86235	0.027449	0.154218	claudin 5 [Source:MGI Symbol;Acc:MGI:1276112]	Cldn5	14.6324	14.7896	8.48386	22.4969	18.1701	10.9513
ENSMUSG00000025902	0.42959	4.50396	4.72817	0.0296725	0.160516	SRY (sex determining region Y)-box 17 [Source:MGI Symbol;Acc:MGI:107543]	Sox17	18.3486	20.3043	18.4259	32.2455	20.4963	25.3469
ENSMUSG00000057367	0.429333	5.65397	6.49456	0.0108205	0.0970391	baculoviral IAP repeat-containing 2 [Source:MGI Symbol;Acc:MGI:1197009]	Birc2	44.052	34.7806	49.445	68.9328	48.3487	55.6395
ENSMUSG00000096856	0.42923	1.97438	1.84651	0.174189	0.414574	predicted gene 10778 [Source:MGI Symbol;Acc:MGI:3809656]	Gm10778	4.02584	2.38137	3.38029	4.84548	3.96095	4.19504
ENSMUSG00000040943	0.429161	6.19333	6.24966	0.0124217	0.103975	tet methylcytosine dioxygenase 2 [Source:MGI Symbol;Acc:MGI:2443298]	Tet2	71.9233	65.3624	47.9868	113.927	71.8	67.2531
ENSMUSG00000034168	0.429103	6.05193	6.72574	0.0095031	0.0897905	interferon regulatory factor 2 binding protein-like [Source:MGI Symbol;Acc:MGI:2442463]	Irf2bpl	63.2522	53.4556	51.1683	98.3518	65.8272	65.1777
ENSMUSG00000044433	0.429075	0.393338	0.382779	0.53612	0.746228	calmodulin regulated spectrin-associated protein family, member 3 [Source:MGI Symbol;Acc:MGI:1916947]	Camsap3	1.39356	2.38137	0	1.21137	1.88616	0.441583
ENSMUSG00000002297	0.428954	2.23309	1.91081	0.166873	0.404055	DBF4 zinc finger [Source:MGI Symbol;Acc:MGI:1351328]	Dbf4	4.02584	2.82005	4.77217	6.9798	4.14956	4.63662
ENSMUSG00000037664	0.428886	3.26341	3.1929	0.0739588	0.25944	cyclin-dependent kinase inhibitor 1C (P57) [Source:MGI Symbol;Acc:MGI:104564]	Cdkn1c	8.28395	8.02147	7.62222	13.7289	8.48774	10.5538
ENSMUSG00000051375	0.42861	5.7331	6.17445	0.0129608	0.106127	protocadherin 1 [Source:MGI Symbol;Acc:MGI:104692]	Pcdh1	49.936	64.5478	22.6015	79.489	69.7252	32.1914
ENSMUSG00000079049	0.4284	1.29473	0.784168	0.375869	0.620779	serine (or cysteine) peptidase inhibitor, clade B, member 1c [Source:MGI Symbol;Acc:MGI:2445363]	Serpinb1c	4.02584	1.00268	1.45816	2.30737	2.13765	3.09108
ENSMUSG00000020656	0.428258	0.190371	0.510989	0.474711	0.700413	grainyhead-like 1 (Drosophila) [Source:MGI Symbol;Acc:MGI:2182540]	Grhl1	1.47098	0.626677	0.596521	1.49979	0.88021	1.0598
ENSMUSG00000045441	0.427849	0.0910899	0.478307	0.48919	0.712372	GPRIN family member 3 [Source:MGI Symbol;Acc:MGI:1924785]	Gprin3	0.541941	1.06535	0.729082	0.749896	1.88616	0.706533
ENSMUSG00000054072	0.427822	6.20232	5.84543	0.0156176	0.11613	interferon inducible GTPase 1 [Source:MGI Symbol;Acc:MGI:1926259]	Iigp1	56.5941	75.2639	56.1393	97.8903	84.3744	70.6533
ENSMUSG00000061603	0.427724	9.04472	7.36011	0.00666866	0.0740416	A kinase (PRKA) anchor protein 6 [Source:MGI Symbol;Acc:MGI:3050566]	Akap6	495.256	442.121	403.514	767.894	509.013	550.036
ENSMUSG00000034509	0.427722	4.02305	3.56721	0.0589311	0.230857	MAD2L1 binding protein [Source:MGI Symbol;Acc:MGI:1913841]	Mad2l1bp	12.6969	15.9176	11.8641	26.131	16.5354	13.5566
ENSMUSG00000035569	0.427649	7.74668	5.10239	0.0238929	0.143204	ankyrin repeat domain 11 [Source:MGI Symbol;Acc:MGI:1924337]	Ankrd11	194.092	177.663	166.098	349.048	184.907	215.934
ENSMUSG00000042854	0.427646	2.49541	1.78226	0.181873	0.4234	transformation related protein 53 regulating kinase B [Source:MGI Symbol;Acc:MGI:1914050]	Trp53rkb	4.02584	5.38942	4.37449	8.59497	4.40105	6.09385
ENSMUSG00000039737	0.42735	3.48705	3.88248	0.0487926	0.208299	Prkr interacting protein 1 (IL11 inducible) [Source:MGI Symbol;Acc:MGI:1914051]	Prkrip1	9.90977	7.89613	10.6048	12.8059	12.7002	12.4968
ENSMUSG00000034621	0.427225	5.8556	5.10279	0.0238874	0.143204	G patch domain containing 8 [Source:MGI Symbol;Acc:MGI:1918667]	Gpatch8	53.4199	49.8835	40.1658	101.755	54.6359	46.7636
ENSMUSG00000017776	0.427073	7.21431	5.56044	0.0183708	0.126615	v-crk avian sarcoma virus CT10 oncogene homolog [Source:MGI Symbol;Acc:MGI:88508]	Crk	101.885	132.793	146.28	175.303	148.378	185.288
ENSMUSG00000021876	0.426862	5.77924	6.73457	0.00945622	0.0897905	ribonuclease, RNase A family 4 [Source:MGI Symbol;Acc:MGI:1926217]	Rnase4	44.9811	41.486	53.6869	70.1441	54.7617	63.4996
ENSMUSG00000038369	0.426731	5.46065	5.79665	0.0160567	0.117665	nuclear receptor coactivator 6 [Source:MGI Symbol;Acc:MGI:1929915]	Ncoa6	50.4005	45.0581	19.6852	64.318	49.7948	34.311
ENSMUSG00000032551	0.426488	3.08436	3.19839	0.073711	0.259056	RIKEN cDNA 1110059G10 gene [Source:MGI Symbol;Acc:MGI:1913452]	1110059G10Rik	6.65813	6.64278	8.0199	10.2101	8.86498	9.58235
ENSMUSG00000022529	0.426373	4.48094	5.61883	0.0177685	0.124627	zinc finger protein 263 [Source:MGI Symbol;Acc:MGI:1921370]	Zfp263	18.3486	17.2336	21.0771	28.7268	22.131	25.5235
ENSMUSG00000074217	0.426116	-1.53359	0.114464	0.735118	0.872183	RIKEN cDNA 2210011C24 gene [Source:MGI Symbol;Acc:MGI:1917384]	2210011C24Rik	0	0.188003	0.265121	0	0.125744	0.618216
ENSMUSG00000046245	0.42609	1.65967	1.52174	0.217356	0.466537	paired immunoglobin-like type 2 receptor alpha [Source:MGI Symbol;Acc:MGI:2450529]	Pilra	2.7097	1.88003	3.18145	3.34569	3.08074	3.88593
ENSMUSG00000071540	0.425787	7.50286	5.83886	0.015676	0.11634	RIKEN cDNA 3425401B19 gene [Source:MGI Symbol;Acc:MGI:3588196]	3425401B19Rik	177.292	164.315	120.1	273.943	177.362	174.425
ENSMUSG00000034780	0.425772	1.67198	1.3552	0.244371	0.498171	UDP-Gal:betaGlcNAc beta 1,3-galactosyltransferase, polypeptide 1 [Source:MGI Symbol;Acc:MGI:1349403]	B3galt1	3.25164	1.50403	3.24773	3.6918	3.20648	3.44435
ENSMUSG00000066361	0.425661	0.901987	0.720412	0.396009	0.638036	serine (or cysteine) peptidase inhibitor, clade A, member 3C [Source:MGI Symbol;Acc:MGI:102848]	Serpina3c	1.70324	0.689345	2.25353	2.24969	1.76042	1.81049
ENSMUSG00000030753	0.425222	7.17327	5.79861	0.0160389	0.117665	THAP domain containing 12 [Source:MGI Symbol;Acc:MGI:1920231]	Thap12	118.762	115.747	133.289	196.934	147.875	152.479
ENSMUSG00000054404	0.424958	6.53967	5.06583	0.0244021	0.144654	schlafen 5 [Source:MGI Symbol;Acc:MGI:1329004]	Slfn5	70.1426	76.392	89.2131	130.597	80.2878	110.528
ENSMUSG00000068130	0.424598	3.07675	3.00204	0.0831597	0.276748	zinc finger protein 442 [Source:MGI Symbol;Acc:MGI:3651999]	Zfp442	7.50975	6.0161	7.75478	10.0948	9.87093	8.56671
ENSMUSG00000052609	0.424545	4.99182	4.94739	0.0261301	0.150415	pleckstrin homology domain containing, family G (with RhoGef domain) member 3 [Source:MGI Symbol;Acc:MGI:2388284]	Plekhg3	31.7422	28.7645	19.6189	52.7235	27.6009	29.6302
ENSMUSG00000034333	0.424516	4.14958	4.52484	0.0334062	0.171105	zinc finger, BED type containing 4 [Source:MGI Symbol;Acc:MGI:2682302]	Zbed4	16.3356	15.7296	12.8584	23.7659	16.2839	20.5778
ENSMUSG00000075592	0.424267	4.38206	4.1084	0.0426708	0.19446	NYN domain and retroviral integrase containing [Source:MGI Symbol;Acc:MGI:2652872]	Nynrin	18.2711	22.059	12.5269	32.5916	20.8107	18.0166
ENSMUSG00000049287	0.423752	5.02578	4.84504	0.0277257	0.154893	IBA57 homolog, iron-sulfur cluster assembly [Source:MGI Symbol;Acc:MGI:3041174]	Iba57	27.0196	32.4619	22.7341	50.3584	33.1965	28.8354
ENSMUSG00000072704	0.423546	6.88825	4.77316	0.0289067	0.158271	small integral membrane protein 10 like 1 [Source:MGI Symbol;Acc:MGI:1914379]	Smim10l1	97.7816	102.462	98.426	182.167	109.146	119.846
ENSMUSG00000051355	0.423479	5.05647	5.86585	0.0154374	0.115511	COMM domain containing 1 [Source:MGI Symbol;Acc:MGI:109474]	Commd1	27.7164	30.7699	26.2469	35.0144	35.397	43.4959
ENSMUSG00000052557	0.423213	4.31495	1.60203	0.205616	0.453227	giant axonal neuropathy [Source:MGI Symbol;Acc:MGI:1890619]	Gan	32.2842	7.08145	16.2386	20.7087	22.634	20.0037
ENSMUSG00000027079	0.422789	2.80946	2.49363	0.114308	0.329052	CLP1, cleavage and polyadenylation factor I subunit [Source:MGI Symbol;Acc:MGI:2138968]	Clp1	5.10973	7.14412	5.36869	7.55665	7.29317	8.61087
ENSMUSG00000037035	0.422771	2.85892	2.21434	0.136733	0.362981	inhibin beta-B [Source:MGI Symbol;Acc:MGI:96571]	Inhbb	4.80005	6.70545	6.56174	8.88339	10.0595	5.74058
ENSMUSG00000053929	0.422283	6.78357	6.34195	0.0117915	0.10164	cysteine and histidine rich 1 [Source:MGI Symbol;Acc:MGI:1859320]	Cyhr1	97.6267	94.5029	88.02	154.363	121.092	104.567
ENSMUSG00000051451	0.422175	4.89254	5.06709	0.0243843	0.144628	CREB/ATF bZIP transcription factor [Source:MGI Symbol;Acc:MGI:2675296]	Crebzf	21.4454	22.8737	31.6156	38.7639	28.6697	33.8694
ENSMUSG00000026158	0.422166	5.0367	6.2364	0.0125151	0.104308	opioid growth factor receptor-like 1 [Source:MGI Symbol;Acc:MGI:1917405]	Ogfrl1	29.4196	30.0805	23.9271	45.9744	35.397	31.3082
ENSMUSG00000043458	0.421799	0.520686	0.487429	0.485076	0.708525	protocadherin beta 12 [Source:MGI Symbol;Acc:MGI:2136747]	Pcdhb12	0.851621	1.69203	0.795362	1.90358	0.943082	1.54554
ENSMUSG00000031077	0.421686	4.1986	5.1266	0.0235619	0.14259	Fas (TNFRSF6)-associated via death domain [Source:MGI Symbol;Acc:MGI:109324]	Fadd	17.1098	14.4136	14.9793	25.4388	19.6161	17.7958
ENSMUSG00000009013	0.421627	4.96586	5.0615	0.0244631	0.144767	dynein light chain LC8-type 1 [Source:MGI Symbol;Acc:MGI:1861457]	Dynll1	22.5292	21.6204	35.1285	41.0712	23.7028	42.3478
ENSMUSG00000031934	0.421619	1.86054	1.54004	0.214612	0.463388	pannexin 1 [Source:MGI Symbol;Acc:MGI:1860055]	Panx1	2.86454	2.94538	3.04889	5.13391	4.02382	3.00276
ENSMUSG00000069609	0.42158	0.800655	0.47237	0.491899	0.71446	CD300 molecule like family member D4 [Source:MGI Symbol;Acc:MGI:3702658]	Cd300ld4	2.55486	2.50671	0	2.59579	1.82329	0.485741
ENSMUSG00000092035	0.421473	1.82101	0.879644	0.348299	0.596897	paternally expressed 10 [Source:MGI Symbol;Acc:MGI:2157785]	Peg10	1.9355	6.2041	1.45816	3.6918	3.26935	3.7093
ENSMUSG00000028019	0.421391	2.32093	1.82249	0.177018	0.417968	platelet-derived growth factor, C polypeptide [Source:MGI Symbol;Acc:MGI:1859631]	Pdgfc	3.871	4.44941	3.91053	7.49896	4.08669	5.25484
ENSMUSG00000051550	0.42138	2.99888	2.60729	0.106373	0.31633	zinc finger protein 579 [Source:MGI Symbol;Acc:MGI:1915740]	Zfp579	7.58717	9.83883	3.31401	10.96	9.87093	5.69642
ENSMUSG00000057982	0.421313	4.15807	4.04698	0.0442504	0.198347	zinc finger protein 809 [Source:MGI Symbol;Acc:MGI:2143362]	Zfp809	15.7163	16.4816	12.7258	27.1116	16.0324	18.1491
ENSMUSG00000042628	0.42079	4.94918	6.43292	0.0112024	0.0989713	zinc finger, FYVE domain containing 1 [Source:MGI Symbol;Acc:MGI:3026685]	Zfyve1	29.8842	25.1924	23.3306	44.6477	32.442	29.0562
ENSMUSG00000027580	0.420585	6.08288	5.40771	0.020048	0.132527	helicase with zinc finger 2, transcriptional coactivator [Source:MGI Symbol;Acc:MGI:2385169]	Helz2	68.9039	56.6516	43.8775	119.234	59.98	57.2733
ENSMUSG00000021575	0.420528	2.60234	2.35398	0.124963	0.346903	aryl-hydrocarbon receptor repressor [Source:MGI Symbol;Acc:MGI:1333776]	Ahrr	5.57425	4.44941	5.03729	9.05644	5.53275	5.96137
ENSMUSG00000033405	0.420402	2.4159	1.8013	0.179556	0.421194	nudix (nucleoside diphosphate linked moiety X)-type motif 15 [Source:MGI Symbol;Acc:MGI:2443366]	Nudt15	4.02584	4.44941	4.50705	8.30654	3.96095	5.8289
ENSMUSG00000072214	0.420262	1.8664	1.42616	0.232392	0.484625	septin 5 [Source:MGI Symbol;Acc:MGI:1195461]	Sept5	3.79358	2.69471	2.45237	3.86485	3.01786	5.12236
ENSMUSG00000078866	0.419842	6.26253	5.39831	0.0201562	0.132839	zinc finger protein 970 [Source:MGI Symbol;Acc:MGI:3652255]	Zfp970	58.8393	63.7957	72.9745	104.409	71.1713	88.4491
ENSMUSG00000032224	0.419601	3.37957	3.55546	0.0593499	0.231542	family with sequence similarity 81, member A [Source:MGI Symbol;Acc:MGI:1924136]	Fam81a	9.29041	9.33749	7.55594	13.6135	13.2032	8.69919
ENSMUSG00000056216	0.419424	5.26333	5.77392	0.0162657	0.11866	CCAAT/enhancer binding protein (C/EBP), gamma [Source:MGI Symbol;Acc:MGI:104982]	Cebpg	32.0519	27.1351	38.2436	54.2233	32.1905	45.6155
ENSMUSG00000030967	0.41937	6.24684	5.63624	0.0175929	0.123742	zinc finger, RAN-binding domain containing 1 [Source:MGI Symbol;Acc:MGI:106441]	Zranb1	63.949	55.5863	74.4326	106.312	75.258	79.22
ENSMUSG00000037408	0.419285	3.39574	3.33048	0.068007	0.248891	cyclin M4 [Source:MGI Symbol;Acc:MGI:2151060]	Cnnm4	7.89685	10.0895	8.61642	12.1137	10.4997	12.9384
ENSMUSG00000053886	0.419233	4.39881	4.83697	0.0278558	0.155107	SH2 domain containing 4A [Source:MGI Symbol;Acc:MGI:1919531]	Sh2d4a	15.8711	17.4216	20.2817	27.227	19.8676	24.9053
ENSMUSG00000022833	0.418838	2.66625	2.48995	0.114575	0.329492	coiled-coil domain containing 14 [Source:MGI Symbol;Acc:MGI:2443448]	Ccdc14	6.50329	5.07609	4.44077	8.01812	7.29317	6.00553
ENSMUSG00000020522	0.418833	5.01863	5.93744	0.0148225	0.11366	microfibrillar-associated protein 3 [Source:MGI Symbol;Acc:MGI:1924068]	Mfap3	28.2583	26.5711	27.3737	46.0898	31.7504	33.5603
ENSMUSG00000026414	0.418817	12.4493	14.2565	0.000159505	0.0110677	troponin T2, cardiac [Source:MGI Symbol;Acc:MGI:104597]	Tnnt2	4856.95	4685.42	4698.67	8024.7	5718.66	5569.86
ENSMUSG00000051444	0.418735	1.68168	1.4286	0.231993	0.484324	Bardet-Biedl syndrome 12 (human) [Source:MGI Symbol;Acc:MGI:2686651]	Bbs12	3.01938	2.19337	2.65121	4.44169	3.52084	2.69366
ENSMUSG00000030059	0.418485	6.77959	5.45574	0.0195041	0.130327	TATA element modulatory factor 1 [Source:MGI Symbol;Acc:MGI:2684999]	Tmf1	80.9814	94.5656	105.783	140.923	105.248	130.664
ENSMUSG00000054434	0.418351	2.94344	2.28594	0.130551	0.354064	transmembrane protein 120B [Source:MGI Symbol;Acc:MGI:3603158]	Tmem120b	4.56779	6.14144	8.94782	8.53728	8.92785	8.12513
ENSMUSG00000043241	0.418203	5.34234	5.4247	0.0198538	0.131642	UPF2 regulator of nonsense transcripts homolog (yeast) [Source:MGI Symbol;Acc:MGI:2449307]	Upf2	35.7681	38.4153	29.0307	59.0111	39.5466	40.7581
ENSMUSG00000051000	0.418124	6.54547	6.1962	0.0128025	0.10543	family with sequence similarity 160, member A1 [Source:MGI Symbol;Acc:MGI:2444746]	Fam160a1	90.7363	89.5522	58.9231	137.231	99.841	83.3709
ENSMUSG00000049295	0.418114	4.80958	6.10947	0.0134459	0.107869	zinc finger protein 219 [Source:MGI Symbol;Acc:MGI:1917140]	Zfp219	24.7744	24.3777	22.3364	36.4565	29.8014	29.6302
ENSMUSG00000059820	0.41803	3.7333	3.51765	0.0607185	0.234195	expressed sequence AU019823 [Source:MGI Symbol;Acc:MGI:2143205]	AU019823	12.5421	8.39748	12.9909	17.7091	14.7121	12.6734
ENSMUSG00000063810	0.417949	4.24467	4.29885	0.0381382	0.183591	ALMS1, centrosome and basal body associated [Source:MGI Symbol;Acc:MGI:1934606]	Alms1	19.355	11.9695	16.3712	31.2649	17.6042	16.4269
ENSMUSG00000024053	0.417856	6.11537	5.5732	0.0182374	0.126215	elastin microfibril interfacer 2 [Source:MGI Symbol;Acc:MGI:2389136]	Emilin2	50.2456	72.3186	55.6753	86.9303	81.7967	68.0921
ENSMUSG00000062202	0.417761	4.93302	6.34546	0.0117682	0.1016	BTB (POZ) domain containing 9 [Source:MGI Symbol;Acc:MGI:1916625]	Btbd9	26.0906	25.1298	26.7772	37.6102	34.3911	32.4122
ENSMUSG00000028133	0.417759	0.901751	0.79796	0.371704	0.617231	RWD domain containing 3 [Source:MGI Symbol;Acc:MGI:1920420]	Rwdd3	1.70324	1.81736	0.927922	2.9419	1.82329	1.28059
ENSMUSG00000043496	0.41761	3.97821	4.60701	0.0318414	0.16699	TLR4 interactor with leucine-rich repeats [Source:MGI Symbol;Acc:MGI:1914123]	Tril	13.8582	13.4109	12.6595	20.8817	15.2151	17.6192
ENSMUSG00000026135	0.417558	4.88251	4.30757	0.0379431	0.183105	zinc finger protein 142 [Source:MGI Symbol;Acc:MGI:1924514]	Zfp142	28.568	32.3992	14.5816	48.7433	29.5499	22.3883
ENSMUSG00000033106	0.417467	3.47279	3.74671	0.0529116	0.218002	solute carrier family 7, member 6 opposite strand [Source:MGI Symbol;Acc:MGI:1916951]	Slc7a6os	9.67751	7.64546	10.8699	13.7289	10.9398	12.8501
ENSMUSG00000090210	0.417462	0.964763	0.706157	0.400723	0.642706	integrin, alpha 10 [Source:MGI Symbol;Acc:MGI:2153482]	Itga10	1.47098	2.1307	1.06048	2.71116	1.44606	2.03128
ENSMUSG00000048458	0.417264	4.83856	5.37383	0.0204411	0.133843	family with sequence similarity 212, member B [Source:MGI Symbol;Acc:MGI:1923497]	Fam212b	25.1615	22.9991	24.1923	38.8792	24.2058	35.2383
ENSMUSG00000054931	0.416659	0.971931	0.705259	0.401022	0.642951	zinc finger with KRAB and SCAN domains 4 [Source:MGI Symbol;Acc:MGI:3649412]	Zkscan4	1.1613	2.38137	1.19304	2.76885	1.76042	1.67802
ENSMUSG00000090394	0.416436	5.0057	5.44938	0.0195752	0.130389	RIKEN cDNA 4930523C07 gene [Source:MGI Symbol;Acc:MGI:1914897]	4930523C07Rik	25.7809	32.0859	24.126	43.8401	35.2713	30.7783
ENSMUSG00000026202	0.416399	8.77191	6.6057	0.0101653	0.0934634	tubulin, alpha 4A [Source:MGI Symbol;Acc:MGI:1095410]	Tuba4a	383.307	421.064	310.721	612.088	520.456	374.33
ENSMUSG00000045411	0.416101	4.16471	3.9121	0.0479396	0.206494	RIKEN cDNA 2410002F23 gene [Source:MGI Symbol;Acc:MGI:1914226]	2410002F23Rik	13.8582	16.4816	14.913	26.131	18.7988	16.5594
ENSMUSG00000022793	0.416029	4.13443	4.84104	0.0277901	0.155005	UDP-Gal:betaGlcNAc beta 1,4-galactosyltransferase, polypeptide 4 [Source:MGI Symbol;Acc:MGI:1928387]	B4galt4	16.1034	12.8469	15.4433	23.3045	14.7121	21.9908
ENSMUSG00000078502	0.415936	2.91094	2.29326	0.129937	0.353715	predicted gene 13212 [Source:MGI Symbol;Acc:MGI:3651014]	Gm13212	10.4517	8.58548	0.927922	13.3251	9.61944	1.85465
ENSMUSG00000025574	0.415783	1.94196	1.46829	0.225616	0.476666	thymidine kinase 1 [Source:MGI Symbol;Acc:MGI:98763]	Tk1	3.25164	2.82005	3.11517	6.6337	2.76638	3.62098
ENSMUSG00000002343	0.415402	3.17912	3.23476	0.0720911	0.255903	armadillo repeat containing 6 [Source:MGI Symbol;Acc:MGI:1924063]	Armc6	8.05169	8.1468	6.76058	10.1524	10.2482	10.1123
ENSMUSG00000073758	0.415222	1.91515	1.58874	0.207507	0.454477	SH3 domain containing 21 [Source:MGI Symbol;Acc:MGI:1914188]	Sh3d21	2.63228	3.63473	3.04889	4.7878	3.96095	3.7093
ENSMUSG00000027324	0.415085	2.80767	2.49434	0.114256	0.329007	RNA pseudouridylate synthase domain containing 2 [Source:MGI Symbol;Acc:MGI:1918066]	Rpusd2	6.19361	7.7708	3.84425	9.40255	8.48774	5.56395
ENSMUSG00000033545	0.415018	5.04323	6.04684	0.0139312	0.109823	zinc and ring finger 1 [Source:MGI Symbol;Acc:MGI:2177308]	Znrf1	29.7293	31.8352	22.3364	46.5513	39.1065	27.5106
ENSMUSG00000028848	0.414963	2.88841	2.72979	0.0984923	0.304379	GPN-loop GTPase 2 [Source:MGI Symbol;Acc:MGI:2140368]	Gpn2	6.65813	6.26677	5.70009	9.63328	7.35604	7.9485
ENSMUSG00000078931	0.414908	5.42267	5.84698	0.0156038	0.116114	peptide deformylase (mitochondrial) [Source:MGI Symbol;Acc:MGI:1915273]	Pdf	34.6068	36.786	37.9785	56.0692	40.6783	50.2522
ENSMUSG00000039841	0.414594	4.36946	4.46204	0.0346561	0.174972	zinc finger protein 800 [Source:MGI Symbol;Acc:MGI:1889334]	Zfp800	17.0324	16.9203	18.227	30.1689	18.7988	21.9467
ENSMUSG00000029641	0.414397	-0.396517	0.297929	0.585184	0.780841	RAS-like, family 11, member A [Source:MGI Symbol;Acc:MGI:1916145]	Rasl11a	0.23226	0.250671	1.19304	0.288422	0.565849	1.14812
ENSMUSG00000027109	0.414125	6.23652	5.30942	0.0212105	0.13619	trans-acting transcription factor 3 [Source:MGI Symbol;Acc:MGI:1277166]	Sp3	59.3038	55.2729	77.0838	103.428	60.1687	96.0885
ENSMUSG00000004127	0.414098	2.08375	1.11653	0.290668	0.545762	tRNA methyltransferase 10A [Source:MGI Symbol;Acc:MGI:1920421]	Trmt10a	1.5484	3.63473	5.70009	5.07622	3.33222	5.12236
ENSMUSG00000041096	0.413903	4.44111	4.13548	0.0419932	0.192613	TSPY-like 2 [Source:MGI Symbol;Acc:MGI:106244]	Tspyl2	17.6518	18.111	18.8898	31.8994	17.9814	24.817
ENSMUSG00000029862	0.413863	2.56753	2.14421	0.143109	0.371142	chloride channel, voltage-sensitive 1 [Source:MGI Symbol;Acc:MGI:88417]	Clcn1	5.26457	6.0161	3.71169	7.44128	6.0986	6.18216
ENSMUSG00000058163	0.413748	1.34335	0.94371	0.331326	0.582688	predicted gene 5431 [Source:MGI Symbol;Acc:MGI:3645205]	Gm5431	1.47098	1.56669	3.04889	3.57643	1.5718	3.04692
ENSMUSG00000038055	0.413728	4.46297	5.41336	0.0199832	0.132366	dexamethasone-induced transcript [Source:MGI Symbol;Acc:MGI:1926236]	Dexi	21.5228	18.9257	15.841	30.4573	22.4454	22.2999
ENSMUSG00000041794	0.413629	3.06795	2.94966	0.0858959	0.282411	myosin VIIA and Rab interacting protein [Source:MGI Symbol;Acc:MGI:2384407]	Myrip	8.59363	8.08414	4.63961	9.97939	12.0086	6.3588
ENSMUSG00000040481	0.41344	7.12104	5.4532	0.0195325	0.130327	bromodomain PHD finger transcription factor [Source:MGI Symbol;Acc:MGI:2444008]	Bptf	137.266	112.739	101.541	227.334	128.385	127.132
ENSMUSG00000096553	0.413335	2.04188	1.82547	0.176663	0.417463	predicted gene 10097 [Source:MGI Symbol;Acc:MGI:3642295]	Gm10097	3.871	3.00805	3.31401	5.42233	3.64659	4.59246
ENSMUSG00000047583	0.413144	2.47404	2.24531	0.13402	0.359317	tRNA-yW synthesizing protein 3 homolog (S. cerevisiae) [Source:MGI Symbol;Acc:MGI:2445040]	Tyw3	4.87747	4.19874	4.83845	7.03749	5.90998	5.65226
ENSMUSG00000001504	0.413041	3.41644	3.25558	0.0711807	0.254394	Iroquois related homeobox 2 (Drosophila) [Source:MGI Symbol;Acc:MGI:1197526]	Irx2	7.66459	7.01879	12.6595	12.5752	9.68231	13.4683
ENSMUSG00000046541	0.413031	3.8893	3.53299	0.0601594	0.23332	zinc finger protein 526 [Source:MGI Symbol;Acc:MGI:2445181]	Zfp526	11.5356	14.0376	11.9304	19.9588	13.3289	17.1334
ENSMUSG00000064280	0.412915	2.2315	1.97119	0.160322	0.39447	coiled-coil domain containing 146 [Source:MGI Symbol;Acc:MGI:1922422]	Ccdc146	3.94842	4.32407	3.44657	5.8838	4.9669	4.7691
ENSMUSG00000009633	0.412886	5.07018	5.46455	0.019406	0.130126	G0/G1 switch gene 2 [Source:MGI Symbol;Acc:MGI:1316737]	G0s2	25.3164	29.3912	31.2842	40.6675	40.7412	33.2954
ENSMUSG00000030407	0.412841	3.32109	3.41486	0.0646118	0.241878	glutaminyl-peptide cyclotransferase-like [Source:MGI Symbol;Acc:MGI:1914619]	Qpctl	10.5291	9.02415	5.70009	14.7672	12.3229	6.97701
ENSMUSG00000029253	0.412787	3.57671	3.62656	0.0568641	0.227214	centromere protein C1 [Source:MGI Symbol;Acc:MGI:99700]	Cenpc1	10.2969	8.96148	10.8037	17.1322	10.8769	12.6293
ENSMUSG00000027822	0.412762	4.74784	5.79734	0.0160504	0.117665	solute carrier family 33 (acetyl-CoA transporter), member 1 [Source:MGI Symbol;Acc:MGI:1332247]	Slc33a1	23.226	21.119	24.4574	29.0152	30.996	31.4849
ENSMUSG00000040253	0.412566	4.79249	4.38746	0.0362042	0.178851	guanylate binding protein 7 [Source:MGI Symbol;Acc:MGI:2444421]	Gbp7	20.2066	20.6803	29.097	36.8603	20.5592	37.7554
ENSMUSG00000047534	0.412559	0.851035	0.678451	0.410121	0.649589	MIS18 binding protein 1 [Source:MGI Symbol;Acc:MGI:2145099]	Mis18bp1	1.39356	0.626677	2.31981	2.71116	0.943082	1.98712
ENSMUSG00000039356	0.412372	2.63273	1.90778	0.16721	0.404311	exosome component 2 [Source:MGI Symbol;Acc:MGI:2385133]	Exosc2	3.871	4.26141	7.75478	5.94149	7.60753	6.8887
ENSMUSG00000003032	0.412365	5.53788	4.67599	0.0305871	0.163372	Kruppel-like factor 4 (gut) [Source:MGI Symbol;Acc:MGI:1342287]	Klf4	46.994	38.9793	30.8866	78.0469	36.6545	46.3221
ENSMUSG00000070425	0.412313	1.32739	1.07419	0.300002	0.553453	Xndc1-transient receptor potential cation channel, subfamily C, member 2 readthrough [Source:MGI Symbol;Acc:MGI:5546370]	Xntrpc	3.25164	1.62936	1.3256	3.98022	1.76042	2.38455
ENSMUSG00000049690	0.412304	4.08134	4.82398	0.0280665	0.155767	NCK-associated protein 5 [Source:MGI Symbol;Acc:MGI:2686394]	Nckap5	17.4195	13.8496	11.599	25.8426	18.0443	14.0865
ENSMUSG00000048280	0.412292	3.97321	2.28951	0.130251	0.354064	zinc finger protein 738 [Source:MGI Symbol;Acc:MGI:3040706]	Zfp738	11.0711	12.2202	15.5096	27.5731	14.1462	12.8501
ENSMUSG00000021392	0.412275	4.96771	5.51417	0.018863	0.128416	nucleolar protein 8 [Source:MGI Symbol;Acc:MGI:1918180]	Nol8	24.0776	24.6911	31.4168	39.6868	31.3732	35.5474
ENSMUSG00000034206	0.412135	3.92526	3.10521	0.0780421	0.267678	polymerase (DNA directed), theta [Source:MGI Symbol;Acc:MGI:2155399]	Polq	9.52267	14.5389	14.5816	19.0935	13.0774	19.253
ENSMUSG00000049086	0.412074	1.9396	1.44323	0.229617	0.481735	brain expressed myelocytomatosis oncogene [Source:MGI Symbol;Acc:MGI:88184]	Bmyc	2.78712	3.6974	2.91633	5.59538	3.3951	3.75346
ENSMUSG00000029298	0.412004	4.9962	4.74336	0.0294116	0.159566	guanylate-binding protein 9 [Source:MGI Symbol;Acc:MGI:3605620]	Gbp9	25.0067	26.1951	29.6272	45.5706	27.2236	36.8722
ENSMUSG00000001802	0.411817	3.61987	3.87334	0.0490587	0.20903	low density lipoprotein receptor-related protein 3 [Source:MGI Symbol;Acc:MGI:3584516]	Lrp3	11.613	9.52549	9.87574	18.0552	11.4427	12.4085
ENSMUSG00000079084	0.411661	3.78001	3.82914	0.0503688	0.212469	coiled-coil domain containing 82 [Source:MGI Symbol;Acc:MGI:1913646]	Ccdc82	12.9292	10.2775	11.2676	21.6893	12.6373	12.8059
ENSMUSG00000021079	0.411648	3.5434	3.34269	0.0675043	0.248229	translocase of inner mitochondrial membrane 9 [Source:MGI Symbol;Acc:MGI:1353436]	Timm9	9.44525	9.77616	10.2071	14.1327	15.4666	10.1564
ENSMUSG00000022756	0.411405	1.04051	0.838968	0.359692	0.606757	solute carrier family 7 (cationic amino acid transporter, y+ system), member 4 [Source:MGI Symbol;Acc:MGI:2146512]	Slc7a4	1.70324	2.56938	0.861642	2.48043	2.45201	1.54554
ENSMUSG00000056019	0.411383	3.66097	3.07264	0.0796201	0.270511	zinc finger protein 709 [Source:MGI Symbol;Acc:MGI:2384299]	Zfp709	8.59363	9.83883	13.6537	17.0169	10.814	14.9697
ENSMUSG00000069206	0.41123	3.11579	2.70178	0.100236	0.306853	zinc finger protein 874a [Source:MGI Symbol;Acc:MGI:3040703]	Zfp874a	6.81297	7.39479	7.48966	10.5562	7.29317	11.437
ENSMUSG00000040767	0.411107	1.41871	1.26097	0.261467	0.516081	small nuclear ribonucleoprotein 25 (U11/U12) [Source:MGI Symbol;Acc:MGI:1925622]	Snrnp25	2.40002	2.06803	2.05468	3.34569	2.57776	2.78197
ENSMUSG00000021510	0.411027	4.1897	3.57495	0.0586571	0.230442	zinc finger protein 729a [Source:MGI Symbol;Acc:MGI:3036250]	Zfp729a	14.8647	13.6616	17.4317	28.323	17.3527	17.0009
ENSMUSG00000048039	0.410867	4.27384	4.08379	0.0432964	0.196223	interferon stimulated exonuclease gene 20-like 2 [Source:MGI Symbol;Acc:MGI:2140076]	Isg20l2	15.0969	17.171	16.7689	26.4194	17.4156	22.2116
ENSMUSG00000014773	0.410704	2.99926	2.27674	0.131328	0.35514	delta-like 1 (Drosophila) [Source:MGI Symbol;Acc:MGI:104659]	Dll1	7.89685	5.6401	5.83265	15.344	6.79019	5.74058
ENSMUSG00000031227	0.410665	3.00821	2.76989	0.0960528	0.301433	melanoma antigen, family E, 1 [Source:MGI Symbol;Acc:MGI:2148149]	Magee1	7.20007	7.64546	5.56753	10.0371	8.48774	8.47839
ENSMUSG00000041225	0.410623	5.34373	5.48831	0.019144	0.129224	Rho GTPase activating protein 12 [Source:MGI Symbol;Acc:MGI:1922665]	Arhgap12	34.0648	28.7018	40.7623	57.6843	34.8941	46.587
ENSMUSG00000022961	0.410154	9.24311	5.48061	0.0192285	0.129484	Son DNA binding protein [Source:MGI Symbol;Acc:MGI:98353]	Son	524.831	483.607	523.414	953.464	520.204	629.388
ENSMUSG00000041203	0.409521	5.19577	5.17539	0.0229091	0.140845	telomerase RNA component interacting RNase [Source:MGI Symbol;Acc:MGI:1922833]	Trir	26.8648	32.5245	34.5982	44.59	44.9536	35.5033
ENSMUSG00000022179	0.409178	2.52486	2.20526	0.137541	0.3642	RIKEN cDNA 4931414P19 gene [Source:MGI Symbol;Acc:MGI:1921609]	4931414P19Rik	6.34845	4.0734	4.17565	7.55665	6.41296	5.25484
ENSMUSG00000030421	0.408971	4.54965	4.72199	0.0297792	0.160761	URI1, prefoldin-like chaperone [Source:MGI Symbol;Acc:MGI:1342294]	Uri1	16.6453	20.6803	22.8004	27.5731	27.035	24.8611
ENSMUSG00000013150	0.408952	2.93051	2.66044	0.102872	0.311064	glucose-fructose oxidoreductase domain containing 2 [Source:MGI Symbol;Acc:MGI:1917825]	Gfod2	8.82589	5.76543	4.90473	10.2101	8.92785	6.44711
ENSMUSG00000031832	0.408907	3.18549	2.73617	0.0980993	0.304212	TATA-box binding protein associated factor, RNA polymerase I, C [Source:MGI Symbol;Acc:MGI:109576]	Taf1c	7.97427	7.7708	6.95942	14.248	8.362	8.43424
ENSMUSG00000022706	0.408892	4.64157	5.20178	0.0225638	0.139574	mitochondrial ribosomal protein L40 [Source:MGI Symbol;Acc:MGI:1332635]	Mrpl40	18.5034	21.871	23.662	29.0729	28.7955	26.9366
ENSMUSG00000017188	0.408776	5.49188	5.98771	0.0144059	0.111489	cytochrome C oxidase assembly factor 3 [Source:MGI Symbol;Acc:MGI:1098757]	Coa3	33.5229	41.5487	40.696	52.7812	48.4116	52.0626
ENSMUSG00000020817	0.408541	6.18759	5.74188	0.0165651	0.120126	rabaptin, RAB GTPase binding effector protein 1 [Source:MGI Symbol;Acc:MGI:1860236]	Rabep1	61.9361	59.6597	64.358	84.969	65.2613	100.063
ENSMUSG00000052387	0.408487	2.14346	1.90004	0.168074	0.40547	transient receptor potential cation channel, subfamily M, member 3 [Source:MGI Symbol;Acc:MGI:2443101]	Trpm3	3.94842	3.82273	3.24773	5.71075	4.84116	4.15088
ENSMUSG00000053414	0.408352	0.437616	0.563154	0.452992	0.684855	hormonally upregulated Neu-associated kinase [Source:MGI Symbol;Acc:MGI:1347352]	Hunk	1.39356	1.25335	0.596521	1.73053	1.38319	1.0598
ENSMUSG00000020063	0.408298	4.48867	3.88029	0.0488562	0.208438	sirtuin 1 [Source:MGI Symbol;Acc:MGI:2135607]	Sirt1	14.2453	20.4297	23.1318	27.9192	22.4454	25.5235
ENSMUSG00000041849	0.408178	2.86024	2.37969	0.122922	0.343522	caspase recruitment domain family, member 6 [Source:MGI Symbol;Acc:MGI:3032959]	Card6	8.43879	6.95612	2.78377	13.5558	7.54466	3.7093
ENSMUSG00000037791	0.40817	5.1428	5.79424	0.0160788	0.117689	PHD finger protein 12 [Source:MGI Symbol;Acc:MGI:1924057]	Phf12	34.6842	35.8459	20.0829	53.185	39.9867	27.4665
ENSMUSG00000026532	0.408099	4.49217	3.27742	0.0702392	0.252806	spectrin alpha, erythrocytic 1 [Source:MGI Symbol;Acc:MGI:98385]	Spta1	7.97427	6.2041	44.2089	16.7861	5.72137	52.4601
ENSMUSG00000024742	0.408	3.28286	2.35184	0.125135	0.346988	flap structure specific endonuclease 1 [Source:MGI Symbol;Acc:MGI:102779]	Fen1	7.66459	7.52013	8.81526	15.4017	6.79019	11.2162
ENSMUSG00000043079	0.407964	6.64582	2.73486	0.0981802	0.304319	synaptopodin [Source:MGI Symbol;Acc:MGI:1099446]	Synpo	157.318	79.3373	35.3273	170.226	70.354	87.6984
ENSMUSG00000070476	0.407702	4.64614	5.3047	0.0212679	0.13619	family with sequence similarity 217, member B [Source:MGI Symbol;Acc:MGI:1918782]	Fam217b	20.3615	24.8791	19.0224	31.1495	28.7326	25.2144
ENSMUSG00000057561	0.407622	5.06755	6.30443	0.0120437	0.102638	eukaryotic translation initiation factor 1A [Source:MGI Symbol;Acc:MGI:95298]	Eif1a	24.4647	27.4485	34.2668	32.8224	37.7233	43.4518
ENSMUSG00000045665	0.407486	4.22622	4.52533	0.0333967	0.171105	major facilitator superfamily domain containing 5 [Source:MGI Symbol;Acc:MGI:2145901]	Mfsd5	15.5614	17.171	14.913	25.4388	20.4335	17.9283
ENSMUSG00000025764	0.40741	5.6273	3.30001	0.0692794	0.251092	jade family PHD finger 1 [Source:MGI Symbol;Acc:MGI:1925835]	Jade1	34.5294	41.3607	48.8485	77.4701	38.9807	54.3589
ENSMUSG00000067199	0.40737	1.95205	1.12807	0.288187	0.542895	frequently rearranged in advanced T cell lymphomas [Source:MGI Symbol;Acc:MGI:109450]	Frat1	2.94196	3.94807	2.51865	5.5377	2.51489	4.7691
ENSMUSG00000015980	0.406906	1.94167	1.60799	0.204775	0.452134	leucine rich repeat containing 27 [Source:MGI Symbol;Acc:MGI:1923862]	Lrrc27	2.16776	3.44672	3.97681	3.57643	4.40105	4.54831
ENSMUSG00000035666	0.406874	5.62722	5.96595	0.0145848	0.112339	general transcription factor IIIC, polypeptide 4 [Source:MGI Symbol;Acc:MGI:2138937]	Gtf3c4	41.1101	38.854	47.1915	61.4338	54.1329	52.9458
ENSMUSG00000028909	0.406848	2.0247	1.39297	0.237905	0.49064	protein tyrosine phosphatase, receptor type, U [Source:MGI Symbol;Acc:MGI:1321151]	Ptpru	2.3226	5.13875	2.71749	5.24927	5.53275	2.69366
ENSMUSG00000023156	0.406829	4.85572	5.82266	0.015821	0.117045	ribonuclease P 14 subunit [Source:MGI Symbol;Acc:MGI:1914303]	Rpp14	25.3938	21.307	27.7714	34.5529	30.996	32.8096
ENSMUSG00000060397	0.406674	2.63783	2.13177	0.144274	0.373056	zinc finger protein 128 [Source:MGI Symbol;Acc:MGI:2389445]	Zfp128	5.96135	5.07609	4.63961	6.51833	6.28722	7.9485
ENSMUSG00000051486	0.40654	0.493917	0.462174	0.496609	0.717136	protocadherin beta 11 [Source:MGI Symbol;Acc:MGI:2136746]	Pcdhb11	0.696781	2.00537	0.729082	1.8459	1.32032	1.0598
ENSMUSG00000037573	0.40619	5.85606	5.92955	0.014889	0.11366	transducer of ErbB-2.1 [Source:MGI Symbol;Acc:MGI:1349721]	Tob1	64.1813	48.7555	35.1285	94.9484	53.4413	50.3405
ENSMUSG00000078779	0.406151	3.13429	1.59795	0.206194	0.45373	zinc finger protein 59 [Source:MGI Symbol;Acc:MGI:99206]	Zfp59	5.03231	7.52013	9.3455	14.0173	6.72732	9.05245
ENSMUSG00000041477	0.405846	2.0997	0.909505	0.340246	0.590138	decapping mRNA 1B [Source:MGI Symbol;Acc:MGI:2442404]	Dcp1b	4.64521	4.95075	1.52444	4.49938	3.58371	5.6081
ENSMUSG00000003134	0.405811	3.51529	2.98915	0.0838244	0.278113	TBC1 domain family, member 8 [Source:MGI Symbol;Acc:MGI:1927225]	Tbc1d8	10.3743	12.5335	6.6943	12.8059	12.8259	12.4968
ENSMUSG00000027339	0.405676	4.26478	4.66065	0.0308615	0.164436	Ras association (RalGDS/AF-6) domain family member 2 [Source:MGI Symbol;Acc:MGI:2442060]	Rassf2	15.484	15.4163	18.0282	23.4775	17.227	24.6845
ENSMUSG00000018442	0.405534	4.96578	4.81046	0.0282875	0.156381	Der1-like domain family, member 2 [Source:MGI Symbol;Acc:MGI:2151483]	Derl2	21.755	21.683	38.2436	33.5723	33.1965	38.0645
ENSMUSG00000028541	0.40551	2.96576	1.86824	0.171676	0.411376	UDP-Gal:betaGlcNAc beta 1,4- galactosyltransferase, polypeptide 2 [Source:MGI Symbol;Acc:MGI:1858493]	B4galt2	8.90331	4.82541	6.29661	6.80675	9.24221	9.97978
ENSMUSG00000043895	0.405171	3.56951	2.06813	0.150406	0.381336	sphingosine-1-phosphate receptor 2 [Source:MGI Symbol;Acc:MGI:99569]	S1pr2	6.96781	12.4082	10.8037	17.0169	10.1224	12.8942
ENSMUSG00000031671	0.404962	3.23887	1.65986	0.197623	0.442532	SET domain containing 6 [Source:MGI Symbol;Acc:MGI:1913333]	Setd6	3.79358	10.7162	10.2734	10.2101	12.8259	7.9485
ENSMUSG00000037533	0.404888	6.08137	5.50751	0.0189349	0.128608	Rap guanine nucleotide exchange factor (GEF) 6 [Source:MGI Symbol;Acc:MGI:2384761]	Rapgef6	58.1425	65.3624	51.1683	82.604	69.9767	78.0719
ENSMUSG00000002679	0.404255	2.66306	1.90597	0.167412	0.404543	mediator complex subunit 6 [Source:MGI Symbol;Acc:MGI:1917042]	Med6	6.19361	5.13875	4.57333	5.8838	6.47583	8.7875
ENSMUSG00000090799	0.403736	1.93153	1.14161	0.285312	0.540352	kelch-like 33 [Source:MGI Symbol;Acc:MGI:3644593]	Klhl33	3.32906	3.19605	2.25353	8.24886	2.76638	2.34039
ENSMUSG00000036181	0.403662	7.49811	4.68994	0.0303397	0.162382	histone cluster 1, H1c [Source:MGI Symbol;Acc:MGI:1931526]	Hist1h1c	135.021	165.129	165.303	234.718	211.691	171.952
ENSMUSG00000063049	0.403478	2.87313	2.57374	0.10865	0.320761	inhibitor of growth family, member 2 [Source:MGI Symbol;Acc:MGI:1916510]	Ing2	7.50975	5.26409	5.76637	10.3832	7.48179	6.80038
ENSMUSG00000046909	0.40339	4.10257	4.25451	0.0391463	0.186125	transcription elongation factor, mitochondrial [Source:MGI Symbol;Acc:MGI:1915800]	Tefm	14.7098	12.5962	16.3712	24.3428	15.4666	18.679
ENSMUSG00000055313	0.403141	1.19755	0.979369	0.322355	0.574245	piggyBac transposable element derived 1 [Source:MGI Symbol;Acc:MGI:2441675]	Pgbd1	1.85808	2.38137	1.39188	2.30737	2.82925	2.20792
ENSMUSG00000064065	0.40296	-0.201348	0.356	0.550736	0.756566	interaction protein for cytohesin exchange factors 1 [Source:MGI Symbol;Acc:MGI:2444159]	Ipcef1	0.851621	0.438674	0.662802	0.749896	0.943082	0.839008
ENSMUSG00000026072	0.402095	5.2702	5.71595	0.0168115	0.121282	interleukin 1 receptor, type I [Source:MGI Symbol;Acc:MGI:96545]	Il1r1	32.0519	35.5326	31.4831	50.5892	42.0615	38.9476
ENSMUSG00000033578	0.402082	1.80418	1.26342	0.261005	0.515634	transmembrane protein 35A [Source:MGI Symbol;Acc:MGI:1914814]	Tmem35a	2.09034	2.56938	3.97681	4.49938	2.76638	4.10672
ENSMUSG00000046753	0.402024	4.37917	4.60684	0.0318447	0.16699	coiled-coil domain containing 66 [Source:MGI Symbol;Acc:MGI:2443639]	Ccdc66	19.8195	16.6069	16.4375	30.0535	17.6671	23.3597
ENSMUSG00000025612	0.40191	6.56896	4.80596	0.0283615	0.156526	BTB and CNC homology 1, basic leucine zipper transcription factor 1 [Source:MGI Symbol;Acc:MGI:894680]	Bach1	80.5169	76.8306	84.5735	142.942	93.3023	90.6128
ENSMUSG00000037577	0.401866	1.08761	0.899852	0.342821	0.592956	epoxide hydrolase 3 [Source:MGI Symbol;Acc:MGI:1919182]	Ephx3	1.9355	1.44136	1.72328	2.88422	1.69755	2.25207
ENSMUSG00000036867	0.4017	4.19966	4.0343	0.0445841	0.199161	SMAD family member 6 [Source:MGI Symbol;Acc:MGI:1336883]	Smad6	17.1098	15.5416	13.72	29.1306	16.5983	17.3101
ENSMUSG00000020009	0.401652	5.866	6.37865	0.0115501	0.100485	interferon gamma receptor 1 [Source:MGI Symbol;Acc:MGI:107655]	Ifngr1	49.6263	46.9381	53.3555	68.2982	56.3963	74.3184
ENSMUSG00000009555	0.401562	4.51762	3.9932	0.0456842	0.201059	cyclin-dependent kinase 9 (CDC2-related kinase) [Source:MGI Symbol;Acc:MGI:1328368]	Cdk9	21.2131	20.179	16.1061	38.6485	20.6849	19.7829
ENSMUSG00000001138	0.401367	4.15516	4.55344	0.0328527	0.16959	cyclin M3 [Source:MGI Symbol;Acc:MGI:2151055]	Cnnm3	14.4001	19.7403	11.6653	21.747	23.6399	14.9255
ENSMUSG00000027677	0.401364	5.37161	1.50115	0.220494	0.470679	tetratricopeptide repeat domain 14 [Source:MGI Symbol;Acc:MGI:1914370]	Ttc14	62.478	17.171	33.7366	40.5521	55.8305	38.1969
ENSMUSG00000024238	0.401336	6.68564	5.65006	0.0174548	0.123218	zinc finger E-box binding homeobox 1 [Source:MGI Symbol;Acc:MGI:1344313]	Zeb1	100.569	73.3212	87.8875	160.651	84.6259	109.689
ENSMUSG00000018923	0.400727	2.46867	1.48308	0.223294	0.47404	mediator complex subunit 11 [Source:MGI Symbol;Acc:MGI:1913422]	Med11	3.32906	4.32407	6.36289	7.55665	5.65849	5.12236
ENSMUSG00000026648	0.400673	2.87275	2.07934	0.149305	0.379548	DNA cross-link repair 1C [Source:MGI Symbol;Acc:MGI:2441769]	Dclre1c	5.49683	4.70008	8.15246	10.787	5.28126	8.56671
ENSMUSG00000034248	0.400531	4.79228	5.36464	0.0205491	0.133894	solute carrier family 25, member 37 [Source:MGI Symbol;Acc:MGI:1914962]	Slc25a37	29.7293	25.1298	16.8352	39.3984	29.1098	25.3027
ENSMUSG00000032968	0.400434	1.8117	1.35036	0.245215	0.498805	inhibin alpha [Source:MGI Symbol;Acc:MGI:96569]	Inha	2.78712	3.57206	2.31981	5.07622	3.45797	3.04692
ENSMUSG00000039759	0.400427	3.20298	2.72289	0.0989189	0.305031	THAP domain containing, apoptosis associated protein 3 [Source:MGI Symbol;Acc:MGI:1917126]	Thap3	8.98073	8.46014	5.96521	13.3251	8.55061	9.14077
ENSMUSG00000059810	0.400402	5.84929	5.92325	0.0149424	0.11374	regulator of G-protein signaling 3 [Source:MGI Symbol;Acc:MGI:1354734]	Rgs3	58.6844	48.7555	39.5693	91.0259	57.2137	49.8989
ENSMUSG00000041684	0.400175	3.79662	4.01233	0.0451686	0.200285	basic, immunoglobulin-like variable motif containing [Source:MGI Symbol;Acc:MGI:2179809]	Bivm	13.9356	12.1575	9.6769	16.4977	16.0953	14.219
ENSMUSG00000017446	0.399867	3.47986	3.33627	0.0677682	0.248363	C1q and tumor necrosis factor related protein 1 [Source:MGI Symbol;Acc:MGI:1919254]	C1qtnf1	12.155	10.2148	5.96521	18.3436	11.6942	7.90434
ENSMUSG00000067430	0.399828	2.84778	1.94323	0.163318	0.399364	zinc finger protein 763 [Source:MGI Symbol;Acc:MGI:1920701]	Zfp763	6.81297	4.13607	6.89314	12.7482	5.78424	6.04969
ENSMUSG00000058672	0.399643	6.13506	6.37716	0.0115598	0.100502	tubulin, beta 2A class IIA [Source:MGI Symbol;Acc:MGI:107861]	Tubb2a	59.8457	54.3329	66.943	80.1812	68.7193	90.657
ENSMUSG00000021245	0.399419	4.72915	5.10956	0.0237943	0.14319	mutL homolog 3 [Source:MGI Symbol;Acc:MGI:1353455]	Mlh3	23.8454	21.871	22.0713	37.2064	26.6578	26.6275
ENSMUSG00000031668	0.399383	4.39192	4.80682	0.0283474	0.156526	eukaryotic translation initiation factor 2 alpha kinase 3 [Source:MGI Symbol;Acc:MGI:1341830]	Eif2ak3	18.8131	18.5496	16.4375	27.2847	20.7478	23.2273
ENSMUSG00000020155	0.399016	-0.185394	0.22629	0.634288	0.810696	potassium large conductance calcium-activated channel, subfamily M, beta member 1 [Source:MGI Symbol;Acc:MGI:1334203]	Kcnmb1	1.23872	1.19069	0	1.096	0.691594	0.441583
ENSMUSG00000025176	0.398648	-0.0815014	0.343292	0.557935	0.760671	4-hydroxy-2-oxoglutarate aldolase 1 [Source:MGI Symbol;Acc:MGI:1914682]	Hoga1	0.541941	0.689345	0.861642	0.980634	1.32032	0.574058
ENSMUSG00000049323	0.398578	5.95831	6.13477	0.0132549	0.107186	Smith-Magenis syndrome chromosome region, candidate 8 homolog (human) [Source:MGI Symbol;Acc:MGI:2444720]	Smcr8	56.1296	53.0796	50.7043	82.604	68.9079	60.806
ENSMUSG00000031015	0.398575	5.18085	5.10366	0.0238754	0.143204	SWA-70 protein [Source:MGI Symbol;Acc:MGI:1298390]	Swap70	30.1164	25.8818	37.3157	49.8393	33.5109	40.0516
ENSMUSG00000002055	0.398436	1.97165	1.51415	0.218508	0.467945	sperm associated antigen 5 [Source:MGI Symbol;Acc:MGI:1927470]	Spag5	3.871	1.50403	4.37449	4.09559	2.2634	6.40295
ENSMUSG00000046387	0.398415	2.66993	1.4987	0.220871	0.471235	protocadherin beta 17 [Source:MGI Symbol;Acc:MGI:2136754]	Pcdhb17	9.21299	0	6.82686	12.5175	0	8.74334
ENSMUSG00000004105	0.398225	6.91814	5.00835	0.0252253	0.147744	angiopoietin-like 2 [Source:MGI Symbol;Acc:MGI:1347002]	Angptl2	102.427	92.3722	116.057	168.265	111.598	133.976
ENSMUSG00000053560	0.398024	4.01039	4.05967	0.0439192	0.197585	immediate early response 2 [Source:MGI Symbol;Acc:MGI:104815]	Ier2	14.7872	13.0349	13.0572	24.1121	15.7809	15.1021
ENSMUSG00000099398	0.397345	0.372868	0.452732	0.50104	0.720259	membrane-spanning 4-domains, subfamily A, member 14 [Source:MGI Symbol;Acc:MGI:2686122]	Ms4a14	1.1613	0.877348	0.795362	2.36506	0.628722	1.14812
ENSMUSG00000039994	0.397301	3.85964	3.1308	0.0768262	0.265658	timeless circadian clock 1 [Source:MGI Symbol;Acc:MGI:1321393]	Timeless	13.2388	14.1002	9.80946	19.4973	12.8259	16.6918
ENSMUSG00000053841	0.397087	5.77315	5.493	0.0190928	0.129037	taxilin alpha [Source:MGI Symbol;Acc:MGI:105968]	Txlna	52.5682	46.4368	40.696	83.1808	50.6121	53.7848
ENSMUSG00000015488	0.396983	5.39994	5.67493	0.017209	0.122412	calcium channel flower domain containing 1 [Source:MGI Symbol;Acc:MGI:1924317]	Cacfd1	47.6134	40.546	22.2701	60.5109	46.9655	34.7526
ENSMUSG00000047417	0.396871	4.70179	3.63594	0.0565448	0.226429	REX1, RNA exonuclease 1 [Source:MGI Symbol;Acc:MGI:1914182]	Rexo1	24.4647	25.9444	16.9014	32.1879	24.2058	31.4849
ENSMUSG00000037525	0.396439	2.05891	1.53357	0.215578	0.464633	BCDIN3 domain containing [Source:MGI Symbol;Acc:MGI:1922534]	Bcdin3d	3.01938	3.82273	3.51285	5.5377	3.89807	4.32751
ENSMUSG00000061306	0.396223	6.96233	5.68124	0.0171472	0.12225	solute carrier family 38, member 10 [Source:MGI Symbol;Acc:MGI:1919305]	Slc38a10	112.337	105.908	103.53	162.612	127.442	135.478
ENSMUSG00000043346	0.396118	0.330086	0.474581	0.490887	0.713552	predicted gene 6741 [Source:MGI Symbol;Acc:MGI:3643504]	Gm6741	1.08388	0.626677	1.25932	1.21137	1.32032	1.28059
ENSMUSG00000037029	0.396072	5.01832	4.64808	0.0310882	0.164968	zinc finger protein 146 [Source:MGI Symbol;Acc:MGI:1347092]	Zfp146	26.9422	28.6391	27.1749	46.3782	29.6757	34.7084
ENSMUSG00000045438	0.396038	5.475	5.26983	0.0216981	0.137404	cytochrome c oxidase assembly protein 19 [Source:MGI Symbol;Acc:MGI:1915283]	Cox19	37.7036	40.6714	35.3936	61.0877	53.0641	38.1528
ENSMUSG00000004100	0.395619	3.2994	2.12238	0.145161	0.373947	peter pan homolog (Drosophila) [Source:MGI Symbol;Acc:MGI:2178445]	Ppan	5.96135	9.40016	9.74318	13.0943	8.73923	11.1279
ENSMUSG00000043059	0.395225	3.07233	2.28277	0.130818	0.354421	zinc finger protein 513 [Source:MGI Symbol;Acc:MGI:2141255]	Zfp513	7.81943	6.51744	6.49546	14.075	6.16147	8.52255
ENSMUSG00000003527	0.394905	3.6976	3.76984	0.0521846	0.216886	DiGeorge syndrome critical region gene 14 [Source:MGI Symbol;Acc:MGI:107854]	Dgcr14	12.6969	10.7788	9.74318	17.2476	12.5744	13.954
ENSMUSG00000049232	0.394787	4.47465	4.31125	0.0378612	0.18298	tigger transposable element derived 2 [Source:MGI Symbol;Acc:MGI:1915390]	Tigd2	18.3486	16.5443	22.2039	30.2266	21.6909	23.4922
ENSMUSG00000033319	0.394719	5.51065	5.52529	0.0187435	0.128021	fem-1 homolog c (C.elegans) [Source:MGI Symbol;Acc:MGI:2444737]	Fem1c	43.8972	37.8513	34.6645	69.4519	45.7709	41.1114
ENSMUSG00000037075	0.394454	5.95845	4.94461	0.0261721	0.150415	ring finger protein 139 [Source:MGI Symbol;Acc:MGI:1923091]	Rnf139	45.4456	55.8369	59.387	77.4124	59.5399	74.4509
ENSMUSG00000009378	0.394131	2.68451	2.0556	0.151648	0.383015	solute carrier family 16 (monocarboxylic acid transporters), member 12 [Source:MGI Symbol;Acc:MGI:2147716]	Slc16a12	3.79358	5.38942	7.15826	5.24927	8.55061	7.50691
ENSMUSG00000028599	0.393744	4.42041	4.09539	0.0430004	0.195486	tumor necrosis factor receptor superfamily, member 1b [Source:MGI Symbol;Acc:MGI:1314883]	Tnfrsf1b	18.6582	17.6096	18.1608	32.0725	21.8166	19.3413
ENSMUSG00000030587	0.393275	2.01552	1.28652	0.25669	0.510419	RIKEN cDNA 2200002D01 gene [Source:MGI Symbol;Acc:MGI:1919525]	2200002D01Rik	2.16776	3.8854	4.10937	5.01854	3.77233	4.37167
ENSMUSG00000024206	0.39322	1.45491	0.983025	0.321453	0.573715	regulatory factor X, 2 (influences HLA class II expression) [Source:MGI Symbol;Acc:MGI:106583]	Rfx2	2.78712	2.1307	1.72328	2.88422	4.65254	1.67802
ENSMUSG00000034647	0.393177	6.03263	5.31841	0.0211013	0.135924	ankyrin repeat domain 12 [Source:MGI Symbol;Acc:MGI:1914357]	Ankrd12	57.136	53.0169	57.9951	91.7181	61.9291	70.0792
ENSMUSG00000045629	0.392607	3.06068	2.40063	0.121286	0.341153	SH3 domain and tetratricopeptide repeats 2 [Source:MGI Symbol;Acc:MGI:2444417]	Sh3tc2	8.05169	7.45746	5.50125	13.3251	7.41892	7.50691
ENSMUSG00000050910	0.392437	3.9932	3.86812	0.0492115	0.209409	cerebellar degeneration-related protein 2-like [Source:MGI Symbol;Acc:MGI:2684867]	Cdr2l	17.1873	12.3455	10.7374	26.9963	13.2032	14.3073
ENSMUSG00000019326	0.39231	4.27586	4.14291	0.0418093	0.192183	amine oxidase, copper containing 3 [Source:MGI Symbol;Acc:MGI:1306797]	Aoc3	20.2066	19.615	9.74318	31.8418	21.3137	12.8501
ENSMUSG00000004896	0.392188	3.63506	3.45257	0.0631536	0.239407	ribosomal RNA adenine dimethylase domain containing 1 [Source:MGI Symbol;Acc:MGI:2387197]	Rrnad1	13.084	9.58816	9.14666	16.8438	10.7511	14.2631
ENSMUSG00000050786	0.391941	2.2069	1.77796	0.1824	0.424024	coiled-coil domain containing 126 [Source:MGI Symbol;Acc:MGI:1889376]	Ccdc126	3.71616	3.50939	4.37449	4.61475	5.02977	5.56395
ENSMUSG00000027221	0.391714	1.12174	0.713326	0.398342	0.64022	carbohydrate (keratan sulfate Gal-6) sulfotransferase 1 [Source:MGI Symbol;Acc:MGI:1924219]	Chst1	1.9355	1.31602	1.85584	3.92253	2.01191	1.32475
ENSMUSG00000052688	0.391617	3.90001	3.49948	0.061388	0.235659	RAB7B, member RAS oncogene family [Source:MGI Symbol;Acc:MGI:2442295]	Rab7b	12.4646	9.83883	15.2444	20.2472	9.80806	20.8869
ENSMUSG00000072915	0.391567	2.477	1.43315	0.231251	0.483461	predicted gene 12258 [Source:MGI Symbol;Acc:MGI:3651534]	Gm12258	4.72263	4.70008	4.10937	9.11412	3.3951	6.40295
ENSMUSG00000022604	0.39143	3.86094	2.76039	0.0966244	0.302358	centrosomal protein 97 [Source:MGI Symbol;Acc:MGI:1921451]	Cep97	11.0711	13.9122	11.8641	21.5163	12.4487	15.4112
ENSMUSG00000067242	0.391111	2.03864	1.4958	0.221318	0.471574	leucine-rich repeat LGI family, member 1 [Source:MGI Symbol;Acc:MGI:1861691]	Lgi1	3.94842	3.6974	2.51865	4.96085	6.35009	2.56118
ENSMUSG00000008373	0.391085	4.83491	5.3508	0.0207127	0.134345	pre-mRNA processing factor 31 [Source:MGI Symbol;Acc:MGI:1916238]	Prpf31	27.8712	23.1244	22.7341	34.6683	28.2925	33.6486
ENSMUSG00000036106	0.391023	1.34033	1.03037	0.310072	0.563462	proline rich 5 (renal) [Source:MGI Symbol;Acc:MGI:1924714]	Prr5	2.47744	2.19337	1.52444	3.63411	3.01786	1.67802
ENSMUSG00000003477	0.390514	2.78596	2.04697	0.15251	0.384325	indolethylamine N-methyltransferase [Source:MGI Symbol;Acc:MGI:102963]	Inmt	7.12265	9.65083	1.19304	9.86402	11.3799	1.72217
ENSMUSG00000025236	0.390366	3.88515	4.0499	0.0441739	0.198208	ADP-dependent glucokinase [Source:MGI Symbol;Acc:MGI:1919391]	Adpgk	12.3872	11.1549	14.2502	15.4594	14.0205	20.357
ENSMUSG00000033595	0.3903	1.11912	0.4423	0.506014	0.723619	leucine-rich repeat LGI family, member 3 [Source:MGI Symbol;Acc:MGI:2182619]	Lgi3	0.619361	3.44672	1.59072	2.192	1.38319	2.78197
ENSMUSG00000005124	0.389915	4.50027	4.3388	0.0372533	0.181177	WNT1 inducible signaling pathway protein 1 [Source:MGI Symbol;Acc:MGI:1197008]	Wisp1	15.6389	18.487	24.6562	25.5542	23.8914	26.5833
ENSMUSG00000030276	0.389806	0.878017	0.707916	0.400137	0.641924	tubulin tyrosine ligase-like family, member 3 [Source:MGI Symbol;Acc:MGI:2141418]	Ttll3	1.70324	1.00268	1.72328	1.78821	1.5718	2.38455
ENSMUSG00000021470	0.389805	4.9568	4.26297	0.0389517	0.185708	excision repair cross-complementing rodent repair deficiency, complementation group 6 like 2 [Source:MGI Symbol;Acc:MGI:1923501]	Ercc6l2	27.9487	27.7618	23.0655	50.0123	29.2984	27.4223
ENSMUSG00000002280	0.389795	5.52085	5.30648	0.0212463	0.13619	nuclear prelamin A recognition factor-like [Source:MGI Symbol;Acc:MGI:1914813]	Narfl	37.8584	36.2219	44.4077	60.3955	43.9476	51.7094
ENSMUSG00000001741	0.389478	3.89289	3.03529	0.0814722	0.273414	interleukin 16 [Source:MGI Symbol;Acc:MGI:1270855]	Il16	12.6969	10.5908	14.7805	20.4203	16.6611	13.2033
ENSMUSG00000024548	0.389415	5.21567	4.90173	0.0268298	0.152241	SET binding protein 1 [Source:MGI Symbol;Acc:MGI:1933199]	Setbp1	39.0971	34.9059	21.4748	60.4532	36.403	29.8952
ENSMUSG00000021895	0.389341	5.36128	5.61434	0.0178141	0.12488	Rho guanine nucleotide exchange factor (GEF) 3 [Source:MGI Symbol;Acc:MGI:1918954]	Arhgef3	34.0648	38.0393	34.2006	50.8776	44.0734	44.4674
ENSMUSG00000032311	0.389288	-1.40618	0.065423	0.798121	0.905916	neuregulin 4 [Source:MGI Symbol;Acc:MGI:1933833]	Nrg4	0	0.313339	0.265121	0.461475	0	0.397425
ENSMUSG00000109901	0.389138	5.17262	5.16696	0.0230205	0.141073	charged multivesicular body protein 1B [Source:MGI Symbol;Acc:MGI:1914314]	Chmp1b	28.9551	29.8298	34.068	45.9167	33.0079	43.6284
ENSMUSG00000089945	0.388867	4.7757	3.20287	0.073509	0.258759	paralemmin A kinase anchor protein [Source:MGI Symbol;Acc:MGI:5141924]	Pakap	27.4841	20.8057	18.8898	51.8005	28.6068	16.1178
ENSMUSG00000020573	0.388858	3.29205	2.75612	0.096883	0.302687	phosphatidylinositol-4,5-bisphosphate 3-kinase catalytic subunit gamma [Source:MGI Symbol;Acc:MGI:1353576]	Pik3cg	7.58717	7.33212	10.2071	11.883	9.99667	10.8629
ENSMUSG00000032105	0.388829	2.38804	1.57947	0.208836	0.455773	PDZ domain containing 3 [Source:MGI Symbol;Acc:MGI:2429554]	Pdzd3	4.18068	5.38942	3.57913	7.61433	4.65254	5.12236
ENSMUSG00000028646	0.388755	5.96661	5.20104	0.0225734	0.139574	Ras-related GTP binding C [Source:MGI Symbol;Acc:MGI:1858751]	Rragc	51.794	53.1422	56.3381	84.6229	62.4321	65.9725
ENSMUSG00000090066	0.38861	8.57055	5.54968	0.0184841	0.127061	RIKEN cDNA 1110002E22 gene [Source:MGI Symbol;Acc:MGI:1915066]	1110002E22Rik	345.216	346.866	290.904	527.119	388.11	382.014
ENSMUSG00000022197	0.388587	7.65017	4.54892	0.0329395	0.169643	PDZ domain containing 2 [Source:MGI Symbol;Acc:MGI:1922394]	Pdzd2	208.105	211.19	105.651	308.265	211.879	159.456
ENSMUSG00000004791	0.388361	2.85542	2.16427	0.141252	0.369001	placental growth factor [Source:MGI Symbol;Acc:MGI:105095]	Pgf	7.43233	5.38942	5.43497	9.86402	5.46988	8.91998
ENSMUSG00000037358	0.388222	4.03582	3.07322	0.0795919	0.270511	RIKEN cDNA 4930578C19 gene [Source:MGI Symbol;Acc:MGI:1923155]	4930578C19Rik	17.3421	14.1629	9.54434	30.515	12.7002	13.38
ENSMUSG00000020755	0.388118	4.55176	3.9721	0.0462602	0.202191	SAP30 binding protein [Source:MGI Symbol;Acc:MGI:1927479]	Sap30bp	16.026	20.4923	23.9934	27.6885	21.2508	30.2043
ENSMUSG00000039376	0.388002	8.1402	5.12872	0.023533	0.142558	synaptopodin 2-like [Source:MGI Symbol;Acc:MGI:1916010]	Synpo2l	308.906	315.908	119.238	428.825	340.579	178.709
ENSMUSG00000091474	0.387975	3.6102	3.49629	0.0615063	0.235906	RIKEN cDNA 2610021A01 gene [Source:MGI Symbol;Acc:MGI:1922662]	2610021A01Rik	10.9162	9.08682	11.2013	16.0362	10.9398	14.1748
ENSMUSG00000046761	0.387321	1.6862	1.16384	0.28067	0.537386	family with sequence similarity 83, member H [Source:MGI Symbol;Acc:MGI:2145900]	Fam83h	2.63228	2.1307	3.11517	4.90317	2.51489	3.1794
ENSMUSG00000047330	0.387308	2.94962	2.45624	0.117059	0.33356	potassium voltage-gated channel, Isk-related subfamily, gene 4 [Source:MGI Symbol;Acc:MGI:1891125]	Kcne4	4.87747	7.33212	7.55594	7.32591	9.11646	9.18493
ENSMUSG00000096795	0.387229	2.78705	1.78821	0.181144	0.422961	zinc finger protein 433 [Source:MGI Symbol;Acc:MGI:1920860]	Zfp433	5.72909	4.51208	7.22454	10.3832	6.53871	6.22632
ENSMUSG00000034422	0.387141	6.06089	5.09547	0.0239884	0.143383	poly (ADP-ribose) polymerase family, member 14 [Source:MGI Symbol;Acc:MGI:1919489]	Parp14	54.2715	54.0822	64.0929	87.4494	62.0548	77.6303
ENSMUSG00000073910	0.387051	0.780853	0.249211	0.617631	0.800772	MOB kinase activator 3B [Source:MGI Symbol;Acc:MGI:2664539]	Mob3b	3.17422	2.31871	0	1.49979	1.88616	0.971483
ENSMUSG00000066441	0.387017	2.67389	1.87805	0.170556	0.409423	retinol dehydrogenase 11 [Source:MGI Symbol;Acc:MGI:102581]	Rdh11	3.4839	5.20142	7.48966	6.22991	5.21839	9.53819
ENSMUSG00000001089	0.386824	6.97428	4.78266	0.0287476	0.157727	leucine zipper protein 1 [Source:MGI Symbol;Acc:MGI:107629]	Luzp1	109.627	99.4537	114.466	179.456	113.61	136.891
ENSMUSG00000021067	0.386786	5.02138	5.01959	0.0250621	0.147081	salvador family WW domain containing 1 [Source:MGI Symbol;Acc:MGI:1927144]	Sav1	28.4906	28.0125	26.976	44.9938	30.8702	34.6201
[truncated: 11,106 more rows]

## Sheet: TAC enriched
ENSMUSG00000022584
ENSMUSG00000110234
ENSMUSG00000089865
ENSMUSG00000049396
ENSMUSG00000109941
ENSMUSG00000015083
ENSMUSG00000026424
ENSMUSG00000041809
ENSMUSG00000037638
ENSMUSG00000035678
ENSMUSG00000036095
ENSMUSG00000038354
ENSMUSG00000033855
ENSMUSG00000028261
ENSMUSG00000048279
ENSMUSG00000102692
ENSMUSG00000073436
ENSMUSG00000098022
ENSMUSG00000049107
ENSMUSG00000038077
ENSMUSG00000014303
ENSMUSG00000047246
ENSMUSG00000069184
ENSMUSG00000006471
ENSMUSG00000024440
ENSMUSG00000040987
ENSMUSG00000029616
ENSMUSG00000026443
ENSMUSG00000047810
ENSMUSG00000050954
ENSMUSG00000043572
ENSMUSG00000031669
ENSMUSG00000079144
ENSMUSG00000060548
ENSMUSG00000034614
ENSMUSG00000051344
ENSMUSG00000038965
ENSMUSG00000039294
ENSMUSG00000039738
ENSMUSG00000051650
ENSMUSG00000045763
ENSMUSG00000016510
ENSMUSG00000059479
ENSMUSG00000066456
ENSMUSG00000028850
ENSMUSG00000038178
ENSMUSG00000033985
ENSMUSG00000066607
ENSMUSG00000034463
ENSMUSG00000069893
ENSMUSG00000029557
ENSMUSG00000059555
ENSMUSG00000051278
ENSMUSG00000050105
ENSMUSG00000079339
ENSMUSG00000054855
ENSMUSG00000059689
ENSMUSG00000079511
ENSMUSG00000090673
ENSMUSG00000060708
ENSMUSG00000035235
ENSMUSG00000050619
ENSMUSG00000021495
ENSMUSG00000054381
ENSMUSG00000035561
ENSMUSG00000000732
ENSMUSG00000037692
ENSMUSG00000042529
ENSMUSG00000071477
ENSMUSG00000072647
ENSMUSG00000063605
ENSMUSG00000040957
ENSMUSG00000041324
ENSMUSG00000047281
ENSMUSG00000048096
ENSMUSG00000043090
ENSMUSG00000052496
ENSMUSG00000035011
ENSMUSG00000103585
ENSMUSG00000056481
ENSMUSG00000051067
ENSMUSG00000020420
ENSMUSG00000057137
ENSMUSG00000056313
ENSMUSG00000047613
ENSMUSG00000027954
ENSMUSG00000008384
ENSMUSG00000030469
ENSMUSG00000021835
ENSMUSG00000050234
ENSMUSG00000049792
ENSMUSG00000041775
ENSMUSG00000072582
ENSMUSG00000012640
ENSMUSG00000074211
ENSMUSG00000031504
ENSMUSG00000047649
ENSMUSG00000067931
ENSMUSG00000043602
ENSMUSG00000036376
ENSMUSG00000052419
ENSMUSG00000056501
ENSMUSG00000062376
ENSMUSG00000068391
ENSMUSG00000068079
ENSMUSG00000056708
ENSMUSG00000053226
ENSMUSG00000051390
ENSMUSG00000040761
ENSMUSG00000046982
ENSMUSG00000030823
ENSMUSG00000072620
ENSMUSG00000064030
ENSMUSG00000019826
ENSMUSG00000039405
ENSMUSG00000049300
ENSMUSG00000048878
ENSMUSG00000036334
ENSMUSG00000045868
ENSMUSG00000078606
ENSMUSG00000022537
ENSMUSG00000043311
ENSMUSG00000046034
ENSMUSG00000055485
ENSMUSG00000074170
ENSMUSG00000071256
ENSMUSG00000050945
ENSMUSG00000048874
ENSMUSG00000043831
ENSMUSG00000057130
ENSMUSG00000042895
ENSMUSG00000071654
ENSMUSG00000050271
ENSMUSG00000045538
ENSMUSG00000032733
ENSMUSG00000103567
ENSMUSG00000046879
ENSMUSG00000024558
ENSMUSG00000039989
ENSMUSG00000038876
ENSMUSG00000079243
ENSMUSG00000072812
ENSMUSG00000089762
ENSMUSG00000039208
ENSMUSG00000039640
ENSMUSG00000031153
ENSMUSG00000036850
ENSMUSG00000095098
ENSMUSG00000040715
ENSMUSG00000109511
ENSMUSG00000051518
ENSMUSG00000005580
ENSMUSG00000029163
ENSMUSG00000103677
ENSMUSG00000051817
ENSMUSG00000071342
ENSMUSG00000063382
ENSMUSG00000072568
ENSMUSG00000045664
ENSMUSG00000046010
ENSMUSG00000023980
ENSMUSG00000068264
ENSMUSG00000032384
ENSMUSG00000038611
ENSMUSG00000038910
ENSMUSG00000052957
ENSMUSG00000021408
ENSMUSG00000020135
ENSMUSG00000002831
ENSMUSG00000035623
ENSMUSG00000030339
ENSMUSG00000060733
ENSMUSG00000025171
ENSMUSG00000102748
ENSMUSG00000002803
ENSMUSG00000045534
ENSMUSG00000045639
ENSMUSG00000043140
ENSMUSG00000056749
ENSMUSG00000007877
ENSMUSG00000045045
ENSMUSG00000032014
ENSMUSG00000007033
ENSMUSG00000021277
ENSMUSG00000039693
ENSMUSG00000047085
ENSMUSG00000047514
ENSMUSG00000060301
ENSMUSG00000005043
ENSMUSG00000036114
ENSMUSG00000025145
ENSMUSG00000033955
ENSMUSG00000032288
ENSMUSG00000048920
ENSMUSG00000027424
ENSMUSG00000070520
ENSMUSG00000036430
ENSMUSG00000096910
ENSMUSG00000050212
ENSMUSG00000043683
ENSMUSG00000034889
ENSMUSG00000053119
ENSMUSG00000074102
ENSMUSG00000038070
ENSMUSG00000055148
ENSMUSG00000041598
ENSMUSG00000030247
ENSMUSG00000007216
ENSMUSG00000030614
ENSMUSG00000029708
ENSMUSG00000043336
ENSMUSG00000060206
ENSMUSG00000038594
ENSMUSG00000023971
ENSMUSG00000027848
ENSMUSG00000046312
ENSMUSG00000046743
ENSMUSG00000068270
ENSMUSG00000005982
ENSMUSG00000047735
ENSMUSG00000003039
ENSMUSG00000069892
ENSMUSG00000044991
ENSMUSG00000025354
ENSMUSG00000051341
ENSMUSG00000103332
ENSMUSG00000038241
ENSMUSG00000032911
ENSMUSG00000041801
ENSMUSG00000021366
ENSMUSG00000069833
ENSMUSG00000043085
ENSMUSG00000049680
ENSMUSG00000037740
ENSMUSG00000049038
ENSMUSG00000037904
ENSMUSG00000040236
ENSMUSG00000054364
ENSMUSG00000022357
ENSMUSG00000028630
ENSMUSG00000074825
ENSMUSG00000022414
ENSMUSG00000026605
ENSMUSG00000036840
ENSMUSG00000031826
ENSMUSG00000045210
ENSMUSG00000052915
ENSMUSG00000025880
ENSMUSG00000052684
ENSMUSG00000032766
ENSMUSG00000045930
ENSMUSG00000067722
ENSMUSG00000034037
ENSMUSG00000034485
ENSMUSG00000045374
ENSMUSG00000061024
ENSMUSG00000044709
ENSMUSG00000025209
ENSMUSG00000074649
ENSMUSG00000020021
ENSMUSG00000070056
ENSMUSG00000001632
ENSMUSG00000022010
ENSMUSG00000021604
ENSMUSG00000031004
ENSMUSG00000033849
ENSMUSG00000036611
ENSMUSG00000094870
ENSMUSG00000049804
ENSMUSG00000055991
ENSMUSG00000061755
ENSMUSG00000032640
ENSMUSG00000052713
ENSMUSG00000043099
ENSMUSG00000046138
ENSMUSG00000079677
ENSMUSG00000036863
ENSMUSG00000036862
ENSMUSG00000040795
ENSMUSG00000054280
ENSMUSG00000026564
ENSMUSG00000030410
ENSMUSG00000027474
ENSMUSG00000033960
ENSMUSG00000035342
ENSMUSG00000025371
ENSMUSG00000019797
ENSMUSG00000045316
ENSMUSG00000038894
ENSMUSG00000046185
ENSMUSG00000074733
ENSMUSG00000015745
ENSMUSG00000079442
ENSMUSG00000021579
ENSMUSG00000005483
ENSMUSG00000043279
ENSMUSG00000041645
ENSMUSG00000061461
ENSMUSG00000043518
ENSMUSG00000044864
ENSMUSG00000052056
ENSMUSG00000048755
ENSMUSG00000096146
ENSMUSG00000047867
ENSMUSG00000022803
ENSMUSG00000059486
ENSMUSG00000028458
ENSMUSG00000041445
ENSMUSG00000020346
ENSMUSG00000032845
ENSMUSG00000044147
ENSMUSG00000040435
ENSMUSG00000029642
ENSMUSG00000027022
ENSMUSG00000044067
ENSMUSG00000058881
ENSMUSG00000001334
ENSMUSG00000027007
ENSMUSG00000038763
ENSMUSG00000001333
ENSMUSG00000044086
ENSMUSG00000039148
ENSMUSG00000027091
ENSMUSG00000000489
ENSMUSG00000038708
ENSMUSG00000075419
ENSMUSG00000031916
ENSMUSG00000047419
ENSMUSG00000026414
ENSMUSG00000051747
ENSMUSG00000040752

## Sheet: Sham
ID	logFC	logCPM	LR	PValue	FDR	description	mgi_symbol	Input1	Input2	Input3	IP1	IP2	IP3
ENSMUSG00000079605	6.05224	2.99247	16.2389	5.58366e-05	0.00062899	zinc finger and BTB domain containing 9 [Source:MGI Symbol;Acc:MGI:1918022]	Zbtb9	9.10698	0	0	11.5104	13.4081	11.2071
ENSMUSG00000011008	5.96807	-1.53683	9.99258	0.00157173	0.00947157	mucolipin 2 [Source:MGI Symbol;Acc:MGI:1915529]	Mcoln2	0	0	0	0.672138	0.531765	0
ENSMUSG00000064147	5.51395	-1.83651	7.95233	0.00480256	0.0230049	RAB44, member RAS oncogene family [Source:MGI Symbol;Acc:MGI:3045302]	Rab44	0	0	0	0.546112	0.341849	0
ENSMUSG00000030365	5.41726	-1.87798	7.44247	0.00637023	0.0285224	C-type lectin domain family 2, member i [Source:MGI Symbol;Acc:MGI:2136650]	Clec2i	0	0	0	0.63013	0.227899	0
ENSMUSG00000036768	5.36146	-1.92235	7.21941	0.00721194	0.0314945	kinesin family member 15 [Source:MGI Symbol;Acc:MGI:1098258]	Kif15	0	0	0	0.546112	0.265882	0
ENSMUSG00000016526	5.2173	-2.06069	7.46898	0.00627711	0.0281814	dual-specificity tyrosine-(Y)-phosphorylation regulated kinase 3 [Source:MGI Symbol;Acc:MGI:1330300]	Dyrk3	0	0	0	0.378078	0.0759664	0.25665
ENSMUSG00000078771	4.91464	0.770179	3.78303	0.0517747	0.137419	ecotropic viral integration site 2a [Source:MGI Symbol;Acc:MGI:95458]	Evi2a	2.80215	0	0	0	3.00067	3.2509
ENSMUSG00000089865	4.32333	1.3783	9.2701	0.00232925	0.0129743	predicted readthrough transcript (NMD candidate), 44503 [Source:MGI Symbol;Acc:MGI:5141975]	Gm44503	4.45796	0	0	2.31048	4.10218	3.37923
ENSMUSG00000078780	3.81157	-2.33601	2.36469	0.124108	0.256579	predicted gene 5150 [Source:MGI Symbol;Acc:MGI:3779469]	Gm5150	0	0	0	0	0.455798	0
ENSMUSG00000005763	3.74089	-0.583707	9.62913	0.00191515	0.0110468	CD247 antigen [Source:MGI Symbol;Acc:MGI:88334]	Cd247	0.254741	0	0	0.588121	0.94958	1.15493
ENSMUSG00000109941	3.69205	0.676781	23.1957	1.46328e-06	2.83442e-05	exosome component 6 [Source:MGI Symbol;Acc:MGI:1919794]	Exosc6	0.12737	0.123807	0.133827	0.0840173	5.35563	1.8821
ENSMUSG00000110234	3.4084	-0.00293104	15.3521	8.92237e-05	0.000924047	predicted gene 45799 [Source:MGI Symbol;Acc:MGI:5804914]	Gm45799	0.445796	0.0619036	0	1.55432	1.74723	0.898276
ENSMUSG00000027496	3.38344	-0.824173	7.2989	0.00689967	0.0303738	aurora kinase A [Source:MGI Symbol;Acc:MGI:894678]	Aurka	0	0	0.334568	0.798164	0.645714	0.684401
ENSMUSG00000036067	3.34016	-1.53258	5.71966	0.016776	0.0592883	solute carrier family 2 (facilitated glucose transporter), member 6 [Source:MGI Symbol;Acc:MGI:2443286]	Slc2a6	0.12737	0	0	0.378078	0.417815	0.3422
ENSMUSG00000053101	3.31334	-2.74304	2.34659	0.125557	0.258514	G protein-coupled receptor 141 [Source:MGI Symbol;Acc:MGI:2672983]	Gpr141	0	0	0	0	0	0.25665
ENSMUSG00000093938	3.28156	0.625015	14.3548	0.000151391	0.00140465	ecotropic viral integration site 2b [Source:MGI Symbol;Acc:MGI:1890682]	Evi2b	1.59213	0	0	3.48672	1.97513	0.855501
ENSMUSG00000079559	3.18365	-0.649456	6.70509	0.0096138	0.0393472	COLCA2 homolog [Source:MGI Symbol;Acc:MGI:2685530]	Colca2	0	0.495229	0	0.546112	0.83563	0.983826
ENSMUSG00000071855	3.15979	-1.19969	5.39771	0.0201631	0.0679592	coiled-coil domain containing 112 [Source:MGI Symbol;Acc:MGI:1918800]	Ccdc112	0.254741	0	0	0.462095	0.531765	0.513301
ENSMUSG00000044551	2.98052	-0.680722	3.68357	0.0549512	0.143267	RIKEN cDNA 9930012K11 gene [Source:MGI Symbol;Acc:MGI:2145726]	9930012K11Rik	0.827907	0	0	0.462095	0.911597	0.684401
ENSMUSG00000023940	2.92988	-1.314	5.00891	0.0252172	0.0802455	shugoshin 1 [Source:MGI Symbol;Acc:MGI:1919665]	Sgo1	0	0.247615	0	0.420086	0.721681	0.1711
ENSMUSG00000106247	2.92805	-0.996307	5.12046	0.0236453	0.0766206	predicted gene 43720 [Source:MGI Symbol;Acc:MGI:5663857]	Gm43720	0.445796	0	0	0.714147	0.531765	0.470526
ENSMUSG00000015316	2.90301	-0.421026	5.46735	0.019375	0.0661022	signaling lymphocytic activation molecule family member 1 [Source:MGI Symbol;Acc:MGI:1351314]	Slamf1	1.01896	0	0	1.09222	0.721681	0.769951
ENSMUSG00000026683	2.83864	-1.43561	3.69748	0.0544948	0.142389	NUF2, NDC80 kinetochore complex component [Source:MGI Symbol;Acc:MGI:1914227]	Nuf2	0	0.185711	0	0.588121	0.607731	0
ENSMUSG00000058743	2.79568	-1.30729	4.5015	0.0338652	0.100219	potassium inwardly-rectifying channel, subfamily J, member 14 [Source:MGI Symbol;Acc:MGI:2384820]	Kcnj14	0	0	0.334568	0.294061	0.341849	0.684401
ENSMUSG00000015981	2.75209	-1.02694	5.16042	0.0231073	0.075437	serine/threonine kinase 32C [Source:MGI Symbol;Acc:MGI:2385336]	Stk32c	0	0.371422	0	0.126026	1.10151	0.427751
ENSMUSG00000098754	2.73454	-0.923294	4.73235	0.0296005	0.09084	prion protein readthrough transcript [Source:MGI Symbol;Acc:MGI:97767]	Prn	0	0	0.602222	0.420086	0.455798	0.898276
ENSMUSG00000049409	2.70574	-1.22551	3.96128	0.0465584	0.127394	prokineticin receptor 1 [Source:MGI Symbol;Acc:MGI:1929676]	Prokr1	0	0.371422	0	0.588121	0.569748	0.213875
ENSMUSG00000020656	2.63537	-0.760069	4.53305	0.0332464	0.0987941	grainyhead-like 1 (Drosophila) [Source:MGI Symbol;Acc:MGI:2182540]	Grhl1	0	0.742844	0	0.588121	0.94958	0.384976
ENSMUSG00000033752	2.61831	-0.832645	3.40735	0.0649066	0.161263	meiotic nuclear divisions 1 [Source:MGI Symbol;Acc:MGI:1924165]	Mnd1	0.827907	0	0	0.63013	0.341849	0.812726
ENSMUSG00000095562	2.57148	2.08065	3.01911	0.0822888	0.192994	predicted gene, 21887 [Source:MGI Symbol;Acc:MGI:5434051]	Gm21887	0	0	10.4385	6.72138	0	7.65674
ENSMUSG00000037544	2.55212	-1.30834	3.3053	0.0690568	0.168853	discs, large (Drosophila) homolog-associated protein 5 [Source:MGI Symbol;Acc:MGI:2183453]	Dlgap5	0.254741	0	0	1.21825	0.151933	0
ENSMUSG00000053414	2.52011	0.201146	15.0767	0.000103228	0.0010387	hormonally upregulated Neu-associated kinase [Source:MGI Symbol;Acc:MGI:1347352]	Hunk	0.254741	0.433325	0.133827	1.00821	2.05109	1.711
ENSMUSG00000030144	2.45222	-0.713532	4.27446	0.0386892	0.110888	C-type lectin domain family 4, member d [Source:MGI Symbol;Acc:MGI:1298389]	Clec4d	0.891592	0	0	1.17624	0.455798	0.3422
ENSMUSG00000034059	2.3926	0.250672	15.4155	8.6277e-05	0.000897075	yippee-like 4 (Drosophila) [Source:MGI Symbol;Acc:MGI:3605071]	Ypel4	0.382111	0.123807	0.468395	1.84838	1.06353	2.0532
ENSMUSG00000022218	2.37814	-1.7884	0.905818	0.341226	0.513781	transglutaminase 1, K polypeptide [Source:MGI Symbol;Acc:MGI:98730]	Tgm1	0.318426	0	0	0	0.379832	0.3422
ENSMUSG00000094634	2.32808	-1.40078	4.1598	0.0413943	0.116625	predicted gene 3468 [Source:MGI Symbol;Acc:MGI:3781644]	Gm3468	0	0.123807	0.133827	0.210043	0.493782	0.513301
ENSMUSG00000030677	2.31725	-0.879433	3.75061	0.0527883	0.139151	kinesin family member 22 [Source:MGI Symbol;Acc:MGI:109233]	Kif22	0.700537	0	0	1.17624	0.455798	0.128325
ENSMUSG00000041930	2.28424	-0.72299	4.84548	0.0277187	0.0862776	family with sequence similarity 222, member A [Source:MGI Symbol;Acc:MGI:3605543]	Fam222a	0	0.123807	0.468395	0.546112	0.94958	0.641626
ENSMUSG00000044966	2.22322	-1.31224	2.44964	0.117552	0.247437	F-box protein 48 [Source:MGI Symbol;Acc:MGI:2442569]	Fbxo48	0	0.371422	0	0.462095	0.759664	0
ENSMUSG00000074480	2.21293	-0.169907	5.95406	0.0146834	0.0539297	mex3 RNA binding family member A [Source:MGI Symbol;Acc:MGI:1919890]	Mex3a	0.191055	0.866651	0	1.30227	1.10151	0.855501
ENSMUSG00000028438	2.16807	-0.222916	6.54549	0.010515	0.042019	kinesin family member 24 [Source:MGI Symbol;Acc:MGI:1918345]	Kif24	0.445796	0.371422	0	1.42829	0.721681	1.15493
ENSMUSG00000042265	2.16774	-1.78742	1.94077	0.163585	0.312137	triggering receptor expressed on myeloid cells 1 [Source:MGI Symbol;Acc:MGI:1930005]	Trem1	0.318426	0	0	0.252052	0.265882	0.213875
ENSMUSG00000067889	2.15101	-0.0498419	4.70562	0.0300642	0.0918836	spectrin beta, non-erythrocytic 2 [Source:MGI Symbol;Acc:MGI:1313261]	Sptbn2	1.21002	0	0.200741	0.966199	0.987563	1.49713
ENSMUSG00000107023	2.10444	3.52096	11.1628	0.000834534	0.00567076	predicted gene 42715 [Source:MGI Symbol;Acc:MGI:5662852]	Gm42715	2.92952	2.90947	2.81037	25.3312	1.67126	30.4558
ENSMUSG00000050855	2.10287	0.180819	8.53743	0.00347917	0.0178397	zinc finger protein 940 [Source:MGI Symbol;Acc:MGI:2446235]	Zfp940	0	0.433325	0.869876	0.840173	1.93714	1.58268
ENSMUSG00000029377	2.06118	-3.1042	1.11539	0.290912	0.463655	epiregulin [Source:MGI Symbol;Acc:MGI:107508]	Ereg	0	0	0	0.0840173	0	0
ENSMUSG00000053297	2.05296	-0.201797	3.75893	0.052526	0.138795	expressed sequence AI854703 [Source:MGI Symbol;Acc:MGI:2141510]	AI854703	0.191055	0	0.802962	0.714147	1.78521	0.684401
ENSMUSG00000027326	2.04437	0.270546	9.23304	0.00237687	0.013155	kinetochore scaffold 1 [Source:MGI Symbol;Acc:MGI:1923714]	Knl1	1.14633	0.309518	0	2.52052	1.67126	0.427751
ENSMUSG00000027737	2.0361	-1.66825	2.18143	0.139684	0.279177	solute carrier family 7 (cationic amino acid transporter, y+ system), member 11 [Source:MGI Symbol;Acc:MGI:1347355]	Slc7a11	0.318426	0	0	0.672138	0.0759664	0.128325
ENSMUSG00000061414	2.02435	0.479704	10.9234	0.000949557	0.0063148	calcium release activated channel regulator 2A [Source:MGI Symbol;Acc:MGI:2685919]	Cracr2a	0.12737	1.17617	0.334568	1.34428	2.20303	1.92488
ENSMUSG00000041707	2.01508	-0.371416	3.90376	0.0481781	0.13049	RIKEN cDNA 1810011H11 gene [Source:MGI Symbol;Acc:MGI:1916319]	1810011H11Rik	1.08265	0	0.133827	0.966199	0.721681	0.898276
ENSMUSG00000094076	2.00992	1.90624	9.83161	0.00171538	0.010114	predicted gene 4767 [Source:MGI Symbol;Acc:MGI:3644409]	Gm4767	0	3.03328	2.54271	4.95702	5.05176	5.26133
ENSMUSG00000046295	1.97292	-1.45696	2.13259	0.144197	0.285237	ankyrin repeat and LEM domain containing 1 [Source:MGI Symbol;Acc:MGI:1918775]	Ankle1	0.509481	0	0	0.63013	0.227899	0.128325
ENSMUSG00000046387	1.95518	2.76503	5.81832	0.0158601	0.0568958	protocadherin beta 17 [Source:MGI Symbol;Acc:MGI:2136754]	Pcdhb17	0	5.69513	6.15605	9.19989	8.96403	9.02554
ENSMUSG00000074657	1.94392	-0.125615	8.06498	0.00451289	0.0220035	kinesin family member 5A [Source:MGI Symbol;Acc:MGI:109564]	Kif5a	0.191055	0.433325	0.267654	0.672138	1.63328	1.1977
ENSMUSG00000067235	1.93456	-1.24072	1.8421	0.174705	0.3266	histocompatibility 2, Q region locus 10 [Source:MGI Symbol;Acc:MGI:95929]	H2-Q10	0.827907	0	0	0.546112	0.265882	0.25665
ENSMUSG00000000627	1.9148	-0.999686	2.81643	0.0933038	0.210734	sema domain, immunoglobulin domain (Ig), TM domain, and short cytoplasmic domain [Source:MGI Symbol;Acc:MGI:1340055]	Sema4f	0.318426	0	0.133827	0.588121	0.873613	0.213875
ENSMUSG00000110170	1.87813	0.279451	6.36718	0.011625	0.0451792	ST6 (alpha-N-acetyl-neuraminyl-2,3-beta-galactosyl-1,3)-N-acetylgalactosaminide alpha-2,6-sialyltransferase 2 [Source:MGI Symbol;Acc:MGI:107553]	St6galnac2	0.700537	0.804747	0	1.09222	1.97513	1.5399
ENSMUSG00000004814	1.83517	-0.421987	4.56705	0.0325927	0.0973102	chemokine (C-C motif) ligand 24 [Source:MGI Symbol;Acc:MGI:1928953]	Ccl24	0.700537	0.247615	0	1.34428	0.645714	0.641626
ENSMUSG00000011171	1.82443	-0.275252	3.53102	0.0602307	0.15325	vasoactive intestinal peptide receptor 2 [Source:MGI Symbol;Acc:MGI:107166]	Vipr2	0.318426	0.619036	0	0.672138	0.759664	1.62545
ENSMUSG00000053684	1.8238	0.130082	4.23394	0.0396233	0.113021	cDNA sequence BC048403 [Source:MGI Symbol;Acc:MGI:2670984]	BC048403	0	0.371422	1.40518	1.13423	1.59529	1.11215
ENSMUSG00000062785	1.81179	-0.443974	4.62894	0.0314369	0.094832	potassium voltage gated channel, Shaw-related subfamily, member 3 [Source:MGI Symbol;Acc:MGI:96669]	Kcnc3	0	0.557133	0.334568	0.504104	1.29143	0.769951
ENSMUSG00000041324	1.80305	-0.0199509	3.9103	0.0479912	0.130065	inhibin beta-A [Source:MGI Symbol;Acc:MGI:96570]	Inhba	1.14633	0	0.267654	1.38629	1.51933	0.598851
ENSMUSG00000026259	1.80118	-1.36488	2.66105	0.102833	0.2254	neuronal guanine nucleotide exchange factor [Source:MGI Symbol;Acc:MGI:1858414]	Ngef	0.191055	0	0.200741	0.588121	0.227899	0.384976
ENSMUSG00000046179	1.78365	-0.996197	2.619	0.105591	0.230175	E2F transcription factor 8 [Source:MGI Symbol;Acc:MGI:1922038]	E2f8	0	0.247615	0.267654	0.714147	0.645714	0.299425
ENSMUSG00000041566	1.77241	-0.170808	6.69167	0.00968646	0.0395951	testis-specific serine kinase 1 [Source:MGI Symbol;Acc:MGI:1347557]	Tssk1	0.382111	0.371422	0.200741	1.59633	1.02555	0.727176
ENSMUSG00000022456	1.76959	-1.74988	1.33985	0.247061	0.415714	septin 3 [Source:MGI Symbol;Acc:MGI:1345148]	Sept3	0	0.309518	0	0.294061	0.455798	0
ENSMUSG00000020974	1.74211	-1.47383	0.501643	0.478779	0.643794	polymerase (DNA directed), epsilon 2 (p59 subunit) [Source:MGI Symbol;Acc:MGI:1197514]	Pole2	0	0	1.20444	0.378078	0.151933	0
ENSMUSG00000033460	1.72809	1.44523	26.5112	2.62018e-07	6.38047e-06	armadillo repeat containing, X-linked 1 [Source:MGI Symbol;Acc:MGI:1925498]	Armcx1	1.01896	1.17617	1.20444	3.19266	3.91227	4.23473
ENSMUSG00000051279	1.72763	0.129704	4.65663	0.0309339	0.0938068	growth differentiation factor 6 [Source:MGI Symbol;Acc:MGI:95689]	Gdf6	0.700537	0.742844	0	2.35248	0.721681	1.0266
ENSMUSG00000071715	1.71324	0.407769	6.08872	0.0136048	0.0509101	neutrophil cytosolic factor 4 [Source:MGI Symbol;Acc:MGI:109186]	Ncf4	1.46476	0	0.401481	3.4027	1.06353	0.556076
ENSMUSG00000089857	1.70468	2.39451	8.84264	0.00294274	0.0156063	zinc finger protein 882 [Source:MGI Symbol;Acc:MGI:3642748]	Zfp882	6.11377	0.433325	2.34197	5.71318	8.50824	6.71568
ENSMUSG00000058447	1.69512	0.843892	1.08686	0.297168	0.470767	predicted gene, 26920 [Source:MGI Symbol;Acc:MGI:5504035]	Gm26920	1.01896	0	0.936789	0	3.64639	3.72143
ENSMUSG00000030187	1.67704	-0.75121	1.58012	0.208743	0.37031	killer cell lectin-like receptor, subfamily A, member 2 [Source:MGI Symbol;Acc:MGI:101906]	Klra2	1.08265	0	0	1.05022	0.683697	0
ENSMUSG00000074417	1.66823	-0.644255	3.26299	0.0708599	0.172201	predicted gene 14548 [Source:MGI Symbol;Acc:MGI:3709645]	Gm14548	0.254741	0.557133	0	1.13423	0.797647	0.213875
ENSMUSG00000051243	1.66487	-0.015019	3.93264	0.0473575	0.128907	immunoglobulin superfamily containing leucine-rich repeat 2 [Source:MGI Symbol;Acc:MGI:2444277]	Islr2	0.764222	0	0.669135	0.882182	1.1395	1.5399
ENSMUSG00000035640	1.65391	0.549547	5.31901	0.0210939	0.0701223	calcium channel, voltage-dependent, beta subunit associated regulatory protein [Source:MGI Symbol;Acc:MGI:1354170]	Cbarp	0	0.742844	1.73975	1.30227	2.20303	1.75378
ENSMUSG00000024521	1.6426	-1.33307	2.26928	0.131961	0.268442	phorbol-12-myristate-13-acetate-induced protein 1 [Source:MGI Symbol;Acc:MGI:1930146]	Pmaip1	0.318426	0	0.133827	0.714147	0.151933	0.3422
ENSMUSG00000075122	1.62882	-1.83673	0.878019	0.348745	0.521743	CD80 antigen [Source:MGI Symbol;Acc:MGI:101775]	Cd80	0	0.185711	0	0	0.721681	0
ENSMUSG00000047307	1.61952	-0.779118	3.39592	0.0653578	0.161879	protocadherin beta 13 [Source:MGI Symbol;Acc:MGI:2136748]	Pcdhb13	0.318426	0.185711	0.133827	0.462095	0.759664	0.769951
ENSMUSG00000009210	1.6169	-0.533983	3.02282	0.0821008	0.192691	proline rich 29 [Source:MGI Symbol;Acc:MGI:1922823]	Prr29	0	0.557133	0.401481	0.672138	0.645714	1.0266
ENSMUSG00000058152	1.60474	-0.180004	3.88125	0.0488281	0.131706	chondroitin sulfate synthase 3 [Source:MGI Symbol;Acc:MGI:1926173]	Chsy3	0	0.68094	0.602222	0.798164	1.32941	0.941051
ENSMUSG00000087141	1.60434	-0.532457	2.44813	0.117665	0.247476	phosphatidylinositol-specific phospholipase C, X domain containing 2 [Source:MGI Symbol;Acc:MGI:3647874]	Plcxd2	0.827907	0	0.267654	0.63013	0.759664	0.855501
ENSMUSG00000035509	1.59686	-0.686607	3.51069	0.0609741	0.154291	F-box and leucine-rich repeat protein 21 [Source:MGI Symbol;Acc:MGI:2442921]	Fbxl21	0.191055	0.185711	0.267654	0.378078	1.17748	0.598851
[truncated: 13,020 more rows]

## Sheet: Sham enriched
ENSMUSG00000079605
ENSMUSG00000011008
ENSMUSG00000064147
ENSMUSG00000030365
ENSMUSG00000036768
[truncated: 1,562 more rows]
