# Supplementary material for: m6A-mRNA methylation regulates cardiac gene expression and cellular growth
Source: Life Sci Alliance. 2019 Apr 9;2(2):e201800233. doi: 10.26508/lsa.201800233 (PMC6458851; doi:10.26508/lsa.201800233)
Supplement: Supplementary file 3 [file LSA-2018-00233_TableS3.xlsx]

## Sheet: RiboSeq
ID	logFC	logCPM	F	PValue	description	mgi_symbol	OE.riboseq.cell.type.hl1.rep.1	OE.riboseq.cell.type.hl1.rep.2	OE.riboseq.cell.type.hl1.rep.3	wt.riboseq.cell.type.hl1.rep.1	wt.riboseq.cell.type.hl1.rep.2	wt.riboseq.cell.type.hl1.rep.3
ENSMUSG00000022160	1.65086	5.99344	83.0145	8.72008e-05	methyltransferase like 3 [Source:MGI Symbol;Acc:MGI:1927165]	Mettl3	110.023	78.0054	93.0013	24.764	34.7784	29.6948
ENSMUSG00000013936	1.13898	3.77606	6.53772	0.042309	myosin, light polypeptide 2, regulatory, cardiac, slow [Source:MGI Symbol;Acc:MGI:97272]	Myl2	14.8679	9.8741	23.745	6.93392	10.9304	3.95931
ENSMUSG00000022679	-0.978898	2.89288	23.9546	0.052483	Mpv17 transgene, kidney disease mutant-like [Source:MGI Symbol;Acc:MGI:2135951]	Mpv17l	3.96479	2.96223	3.9575	5.94336	8.94303	6.92879
ENSMUSG00000080717	-0.970184	2.57095	33.6997	0.0981858	RIKEN cDNA B230307C23 gene [Source:MGI Symbol;Acc:MGI:3643396]	B230307C23Rik	2.97359	1.97482	2.96813	4.9528	5.96202	4.94914
ENSMUSG00000078776	1.02281	3.40102	71.3192	0.0119059	RIKEN cDNA 9530053A07 gene [Source:MGI Symbol;Acc:MGI:2442118]	9530053A07Rik	12.8856	10.8615	10.8831	4.9528	5.96202	5.93897
ENSMUSG00000053347	0.979402	3.23391	40.9575	0.0243947	zinc finger prtoein 943 [Source:MGI Symbol;Acc:MGI:1921920]	Zfp943	8.92077	10.8615	9.89376	5.94336	3.97468	4.94914
ENSMUSG00000073910	-0.845991	3.23392	12.2059	0.0501556	MOB kinase activator 3B [Source:MGI Symbol;Acc:MGI:2664539]	Mob3b	4.95598	3.94964	6.92563	8.91505	11.924	7.91862
ENSMUSG00000046808	-0.843808	2.82729	22.8621	0.102298	ATPase, class V, type 10D [Source:MGI Symbol;Acc:MGI:2450125]	Atp10d	3.96479	2.96223	3.9575	5.94336	7.94936	5.93897
ENSMUSG00000066233	-0.827499	2.72295	22.522	0.126555	transmembrane protein 42 [Source:MGI Symbol;Acc:MGI:1277176]	Tmem42	2.97359	3.94964	2.96813	6.93392	4.96835	5.93897
ENSMUSG00000017754	0.978167	3.15591	28.4178	0.0296652	phospholipid transfer protein [Source:MGI Symbol;Acc:MGI:103151]	Pltp	9.91196	7.89928	9.89376	3.96224	5.96202	3.95931
ENSMUSG00000026950	0.908624	3.94017	80.7892	0.00524652	nebulin [Source:MGI Symbol;Acc:MGI:97292]	Neb	15.8591	18.7608	17.8088	9.90561	8.94303	8.90845
ENSMUSG00000002346	0.888492	3.259	14.1367	0.0380981	solute carrier family 25, member 42 [Source:MGI Symbol;Acc:MGI:1920345]	Slc25a42	11.8944	7.89928	9.89376	3.96224	6.95569	4.94914
ENSMUSG00000069633	-0.796022	3.20838	35.9925	0.06765	peroxisomal biogenesis factor 11 gamma [Source:MGI Symbol;Acc:MGI:1920905]	Pex11g	4.95598	5.92446	4.94688	9.90561	7.94936	9.89828
ENSMUSG00000040152	0.860845	4.19543	54.3764	0.00343324	thrombospondin 1 [Source:MGI Symbol;Acc:MGI:98737]	Thbs1	21.8063	18.7608	22.7556	10.8962	12.9177	10.8881
ENSMUSG00000096727	0.849702	3.30791	28.4453	0.0425116	proteasome (prosome, macropain) subunit, beta type 9 (large multifunctional peptidase 2) [Source:MGI Symbol;Acc:MGI:1346526]	Psmb9	8.92077	10.8615	10.8831	6.93392	4.96835	4.94914
ENSMUSG00000020325	-0.746766	2.68643	26.3356	0.173777	follistatin-like 3 [Source:MGI Symbol;Acc:MGI:1890391]	Fstl3	2.97359	2.96223	3.9575	5.94336	5.96202	4.94914
ENSMUSG00000037419	-0.745233	2.95562	21.542	0.124568	endonuclease domain containing 1 [Source:MGI Symbol;Acc:MGI:1919196]	Endod1	3.96479	3.94964	4.94688	7.92448	7.94936	5.93897
ENSMUSG00000060739	-0.745233	2.95561	22.1862	0.124568	NSA2 ribosome biogenesis homolog [Source:MGI Symbol;Acc:MGI:1913883]	Nsa2	3.96479	4.93705	3.9575	7.92448	5.96202	7.91862
ENSMUSG00000043421	-0.74426	3.18239	33.922	0.0903563	hypoxia inducible lipid droplet associated [Source:MGI Symbol;Acc:MGI:1916823]	Hilpda	5.94718	4.93705	4.94688	7.92448	9.9367	8.90845
ENSMUSG00000033857	0.82088	3.64894	14.4112	0.0239989	endo-beta-N-acetylglucosaminidase [Source:MGI Symbol;Acc:MGI:2443788]	Engase	12.8856	16.786	10.8831	7.92448	5.96202	8.90845
ENSMUSG00000021983	-0.716551	2.57095	90.6729	0.216364	ATPase, aminophospholipid transporter-like, class I, type 8A, member 2 [Source:MGI Symbol;Acc:MGI:1354710]	Atp8a2	2.97359	2.96223	2.96813	4.9528	4.96835	4.94914
ENSMUSG00000026527	-0.714874	3.42339	41.9909	0.071507	regulator of G protein signaling 7 [Source:MGI Symbol;Acc:MGI:1346089]	Rgs7	5.94718	6.91187	6.92563	11.8867	10.9304	9.89828
ENSMUSG00000001053	0.814233	3.35522	13.8723	0.0470297	NEDD4 binding protein 3 [Source:MGI Symbol;Acc:MGI:2442218]	N4bp3	12.8856	10.8615	7.91501	4.9528	5.96202	6.92879
ENSMUSG00000048458	0.761067	4.10146	32.5948	0.012177	family with sequence similarity 212, member B [Source:MGI Symbol;Acc:MGI:1923497]	Fam212b	20.8151	16.786	19.7875	9.90561	12.9177	10.8881
ENSMUSG00000008129	-0.704292	3.01573	21.9075	0.135376	RIKEN cDNA 4930432K21 gene [Source:MGI Symbol;Acc:MGI:1921916]	4930432K21Rik	4.95598	4.93705	3.9575	6.93392	6.95569	8.90845
ENSMUSG00000055733	-0.70397	3.53031	44.5651	0.063574	nucleosome assembly protein 1-like 3 [Source:MGI Symbol;Acc:MGI:1859565]	Nap1l3	7.92957	6.91187	6.92563	10.8962	12.9177	11.8779
ENSMUSG00000041571	0.736891	3.7048	8.8306	0.0375286	selenoprotein W [Source:MGI Symbol;Acc:MGI:1100878]	Selenow	17.8415	11.8489	11.8725	5.94336	9.9367	8.90845
ENSMUSG00000000552	0.714697	5.04486	16.1983	0.00663139	zinc finger protein 385A [Source:MGI Symbol;Acc:MGI:1352495]	Zfp385a	38.6567	45.4208	31.66	22.7829	19.8734	27.7152
ENSMUSG00000049287	0.70999	4.43444	63.296	0.00779611	IBA57 homolog, iron-sulfur cluster assembly [Source:MGI Symbol;Acc:MGI:3041174]	Iba57	25.7711	22.7104	24.7344	13.8678	15.8987	14.8474
ENSMUSG00000017412	-0.694749	2.75858	16.1612	0.18959	calcium channel, voltage-dependent, beta 4 subunit [Source:MGI Symbol;Acc:MGI:103301]	Cacnb4	3.96479	2.96223	3.9575	4.9528	6.95569	5.93897
ENSMUSG00000047675	-0.690571	3.15592	9.36426	0.119454	ribosomal protein S8 [Source:MGI Symbol;Acc:MGI:98166]	Rps8	4.95598	3.94964	6.92563	8.91505	9.9367	6.92879
ENSMUSG00000075590	-0.690571	3.15591	40.6362	0.119454	nuclear receptor binding protein 2 [Source:MGI Symbol;Acc:MGI:2385017]	Nrbp2	5.94718	4.93705	4.94688	7.92448	8.94303	8.90845
ENSMUSG00000033044	-0.688343	3.46712	75.2474	0.0769281	dehydrogenase/reductase (SDR family) member 7C [Source:MGI Symbol;Acc:MGI:1915710]	Dhrs7c	6.93837	6.91187	6.92563	11.8867	10.9304	10.8881
ENSMUSG00000028251	0.705808	3.82728	20.5145	0.0362377	thiosulfate sulfurtransferase (rhodanese)-like domain containing 3 [Source:MGI Symbol;Acc:MGI:1924282]	Tstd3	12.8856	15.7986	16.8194	10.8962	8.94303	7.91862
ENSMUSG00000021608	0.697976	3.90881	27.3935	0.0324236	lysophosphatidylcholine acyltransferase 1 [Source:MGI Symbol;Acc:MGI:2384812]	Lpcat1	16.8503	13.8237	17.8088	9.90561	10.9304	8.90845
ENSMUSG00000020990	-0.679268	2.92459	9.7612	0.166242	cyclin-dependent kinase-like 1 (CDC2-related kinase) [Source:MGI Symbol;Acc:MGI:1918341]	Cdkl1	3.96479	3.94964	4.94688	7.92448	7.94936	4.94914
ENSMUSG00000047033	-0.679268	2.92458	7.32758	0.166242	protocadherin beta 15 [Source:MGI Symbol;Acc:MGI:2136750]	Pcdhb15	2.97359	4.93705	4.94688	8.91505	5.96202	5.93897
ENSMUSG00000030056	-0.679268	2.92459	40.6425	0.166242	ISY1 splicing factor homolog [Source:MGI Symbol;Acc:MGI:1923310]	Isy1	4.95598	3.94964	3.9575	6.93392	6.95569	6.92879
ENSMUSG00000035150	0.670111	4.259	15.6955	0.0185894	eukaryotic translation initiation factor 2, subunit 3, structural gene X-linked [Source:MGI Symbol;Acc:MGI:1349431]	Eif2s3x	20.8151	17.7734	24.7344	13.8678	14.905	10.8881
ENSMUSG00000066415	-0.672969	3.66781	24.1345	0.0604982	male-specific lethal 2 homolog (Drosophila) [Source:MGI Symbol;Acc:MGI:1925103]	Msl2	6.93837	8.88669	8.90438	14.8584	12.9177	11.8779
ENSMUSG00000038146	0.668443	4.72295	17.5386	0.00550516	notch 3 [Source:MGI Symbol;Acc:MGI:99460]	Notch3	34.6919	25.6726	29.6813	15.849	21.8607	18.8067
ENSMUSG00000061411	0.663681	4.51996	33.2965	0.0100746	nucleolar protein 4-like [Source:MGI Symbol;Acc:MGI:1918765]	Nol4l	27.7535	22.7104	26.7132	14.8584	17.8861	15.8372
ENSMUSG00000022339	-0.663752	3.50955	51.8662	0.0823548	estrogen receptor-binding fragment-associated gene 9 [Source:MGI Symbol;Acc:MGI:1859920]	Ebag9	7.92957	6.91187	6.92563	10.8962	11.924	11.8779
ENSMUSG00000006720	-0.661246	2.64895	10.3349	0.235144	zinc finger protein 184 (Kruppel-like) [Source:MGI Symbol;Acc:MGI:1922244]	Zfp184	2.97359	2.96223	3.9575	5.94336	5.96202	3.95931
ENSMUSG00000000881	-0.658744	3.20838	27.3241	0.12828	discs, large homolog 3 (Drosophila) [Source:MGI Symbol;Acc:MGI:1888986]	Dlg3	5.94718	4.93705	5.93626	7.92448	9.9367	8.90845
ENSMUSG00000038893	0.655839	3.84396	11.488	0.0496765	family with sequence similarity 117, member A [Source:MGI Symbol;Acc:MGI:2144564]	Fam117a	12.8856	13.8237	18.7981	10.8962	9.9367	7.91862
ENSMUSG00000042895	0.653676	4.34353	38.0246	0.0176735	actin-binding Rho activating protein [Source:MGI Symbol;Acc:MGI:2444891]	Abra	21.8063	20.7356	24.7344	14.8584	14.905	12.8678
ENSMUSG00000050896	0.648181	4.94791	21.8519	0.00323513	reticulon 4 receptor-like 2 [Source:MGI Symbol;Acc:MGI:2669796]	Rtn4rl2	39.6479	30.6097	35.6175	19.8112	25.8354	21.7762
ENSMUSG00000028862	0.647524	4.2465	7.77935	0.0309297	mitogen-activated protein kinase kinase kinase 6 [Source:MGI Symbol;Acc:MGI:1855691]	Map3k6	17.8415	26.6601	17.8088	14.8584	9.9367	14.8474
ENSMUSG00000032997	0.642529	5.82306	78.6597	0.000101803	chondroitin polymerizing factor [Source:MGI Symbol;Acc:MGI:106576]	Chpf	69.3837	68.1313	62.3307	40.613	41.7341	45.5321
ENSMUSG00000036093	-0.641212	2.98598	4.32055	0.178616	ADP-ribosylation factor-like 5A [Source:MGI Symbol;Acc:MGI:1922673]	Arl5a	2.97359	5.92446	4.94688	9.90561	5.96202	5.93897
ENSMUSG00000019808	-0.640892	3.55077	9.17418	0.0877763	adenosine deaminase, tRNA-specific 2 [Source:MGI Symbol;Acc:MGI:1914007]	Adat2	5.94718	8.88669	7.91501	14.8584	9.9367	10.8881
ENSMUSG00000021716	-0.637728	4.03037	3.86111	0.09604	splicing regulatory glutamine/lysine-rich protein 1interacting protein 1 [Source:MGI Symbol;Acc:MGI:1914538]	Srek1ip1	7.92957	15.7986	9.89376	22.7829	11.924	17.8169
ENSMUSG00000029128	-0.634807	3.12894	5.92234	0.156241	RAB28, member RAS oncogene family [Source:MGI Symbol;Acc:MGI:1917285]	Rab28	3.96479	6.91187	4.94688	9.90561	5.96202	8.90845
ENSMUSG00000015335	0.640518	4.61046	23.5988	0.010134	zinc finger, DHHC domain containing 12 [Source:MGI Symbol;Acc:MGI:1913470]	Zdhhc12	23.7887	30.6097	27.7025	19.8112	15.8987	16.8271
ENSMUSG00000038508	0.63648	6.12894	20.8141	0.00364641	growth differentiation factor 15 [Source:MGI Symbol;Acc:MGI:1346047]	Gdf15	93.1725	71.0935	84.097	46.5563	61.6075	51.471
ENSMUSG00000025150	0.634813	4.27138	6.83345	0.0391455	carbonyl reductase 2 [Source:MGI Symbol;Acc:MGI:107200]	Cbr2	24.7799	22.7104	15.83	10.8962	11.924	17.8169
ENSMUSG00000032515	0.632421	4.33175	65.2348	0.0222036	cysteine-serine-rich nuclear protein 1 [Source:MGI Symbol;Acc:MGI:2387989]	Csrnp1	22.7975	22.7104	20.7769	13.8678	13.9114	14.8474
ENSMUSG00000019828	-0.630228	3.82729	2.99477	0.133239	glutamate receptor, metabotropic 1 [Source:MGI Symbol;Acc:MGI:1351338]	Grm1	5.94718	10.8615	11.8725	21.7923	11.924	10.8881
ENSMUSG00000012422	0.626763	4.1692	36.311	0.0331164	transmembrane protein 167 [Source:MGI Symbol;Acc:MGI:1913324]	Tmem167	19.8239	17.7734	20.7769	11.8867	13.9114	11.8779
ENSMUSG00000037434	0.626703	5.96707	37.0147	0.000829901	solute carrier family 30 (zinc transporter), member 1 [Source:MGI Symbol;Acc:MGI:1345281]	Slc30a1	80.2869	66.1564	74.2032	43.5847	52.6645	46.5219
ENSMUSG00000048668	-0.625721	3.3783	42.6469	0.120267	RAD9-HUS1-RAD1 interacting nuclear orphan 1 [Source:MGI Symbol;Acc:MGI:1915315]	Rhno1	5.94718	6.91187	6.92563	10.8962	9.9367	9.89828
ENSMUSG00000039450	0.626402	6.25588	18.3687	0.00493276	dicarbonyl L-xylulose reductase [Source:MGI Symbol;Acc:MGI:1915130]	Dcxr	106.058	79.9802	85.0863	49.528	64.5885	61.3693
ENSMUSG00000032238	-0.622381	3.48849	9.88273	0.105786	RAR-related orphan receptor alpha [Source:MGI Symbol;Acc:MGI:104661]	Rora	5.94718	6.91187	8.90438	12.8773	11.924	8.90845
ENSMUSG00000037321	0.624987	6.53542	184.787	8.34097e-06	transporter 1, ATP-binding cassette, sub-family B (MDR/TAP) [Source:MGI Symbol;Acc:MGI:98483]	Tap1	112.005	106.64	111.799	70.3298	73.5316	70.2778
ENSMUSG00000061207	0.622597	4.29584	9.17725	0.0263058	serine/threonine kinase 19 [Source:MGI Symbol;Acc:MGI:1860085]	Stk19	26.7623	18.7608	18.7981	10.8962	14.905	15.8372
ENSMUSG00000022123	-0.619524	2.53031	27.2787	0.292968	sciellin [Source:MGI Symbol;Acc:MGI:1891228]	Scel	2.97359	2.96223	2.96813	3.96224	4.96835	4.94914
ENSMUSG00000048280	-0.619524	2.53031	27.2787	0.292968	zinc finger protein 738 [Source:MGI Symbol;Acc:MGI:3040706]	Zfp738	2.97359	2.96223	2.96813	3.96224	4.96835	4.94914
ENSMUSG00000039763	-0.617206	3.68643	28.5092	0.0821891	DnaJ heat shock protein family (Hsp40) member C28 [Source:MGI Symbol;Acc:MGI:2181053]	Dnajc28	7.92957	8.88669	8.90438	14.8584	12.9177	11.8779
ENSMUSG00000041440	-0.617206	3.68643	25.8601	0.0821891	glycerol kinase 5 (putative) [Source:MGI Symbol;Acc:MGI:2443336]	Gk5	7.92957	9.8741	7.91501	13.8678	11.924	13.8576
ENSMUSG00000021253	0.619376	3.98598	7.92905	0.0497311	transforming growth factor, beta 3 [Source:MGI Symbol;Acc:MGI:98727]	Tgfb3	18.8327	18.7608	12.8619	8.91505	9.9367	13.8576
ENSMUSG00000038181	0.611586	4.7139	13.9013	0.0106457	chondroitin polymerizing factor 2 [Source:MGI Symbol;Acc:MGI:1917522]	Chpf2	27.7535	25.6726	34.6282	19.8112	21.8607	15.8372
ENSMUSG00000028676	-0.615161	3.77606	3.02462	0.131652	serine/arginine-rich splicing factor 10 [Source:MGI Symbol;Acc:MGI:1333805]	Srsf10	5.94718	10.8615	10.8831	20.8018	10.9304	10.8881
ENSMUSG00000059796	-0.614016	2.72295	10.653	0.25275	eukaryotic translation initiation factor 4A1 [Source:MGI Symbol;Acc:MGI:95303]	Eif4a1	2.97359	3.94964	3.9575	6.93392	4.96835	4.94914
ENSMUSG00000022383	-0.610442	4.01574	47.0885	0.0502728	peroxisome proliferator activated receptor alpha [Source:MGI Symbol;Acc:MGI:104740]	Ppara	10.9032	10.8615	11.8725	17.8301	17.8861	15.8372
ENSMUSG00000023286	0.599537	4.34353	16.5437	0.0292378	ubiquitin-conjugating enzyme E2J 2 [Source:MGI Symbol;Acc:MGI:2153608]	Ube2j2	24.7799	22.7104	18.7981	12.8773	13.9114	16.8271
ENSMUSG00000035773	0.598786	4.40102	9.69532	0.0260513	KISS1 receptor [Source:MGI Symbol;Acc:MGI:2148793]	Kiss1r	26.7623	18.7608	23.745	12.8773	18.8797	13.8576
ENSMUSG00000068706	-0.605055	3.18238	5.94684	0.16628	predicted pseudogene 10250 [Source:MGI Symbol;Acc:MGI:3642408]	Gm10250	3.96479	6.91187	5.93626	10.8962	6.95569	7.91862
ENSMUSG00000041654	0.587869	4.5303	9.48241	0.0217565	solute carrier family 39 (metal ion transporter), member 11 [Source:MGI Symbol;Acc:MGI:1917056]	Slc39a11	30.7271	24.6852	20.7769	13.8678	16.8924	19.7966
ENSMUSG00000035967	-0.603295	3.30792	16.6721	0.145465	integrator complex subunit 6 like [Source:MGI Symbol;Acc:MGI:2442593]	Ints6l	5.94718	5.92446	6.92563	10.8962	9.9367	7.91862
ENSMUSG00000074064	0.585624	5.18238	9.55475	0.0207943	malonyl-CoA decarboxylase [Source:MGI Symbol;Acc:MGI:1928485]	Mlycd	50.551	37.5216	35.6175	21.7923	29.8101	30.6847
ENSMUSG00000060176	-0.599673	3.62985	46.9947	0.0985684	kinesin family member 27 [Source:MGI Symbol;Acc:MGI:1922300]	Kif27	7.92957	7.89928	8.90438	12.8773	12.9177	11.8779
ENSMUSG00000037935	-0.598077	3.81043	4.99084	0.0766283	SWI/SNF related, matrix associated, actin dependent regulator of chromatin, subfamily e, member 1 [Source:MGI Symbol;Acc:MGI:1927347]	Smarce1	11.8944	6.91187	9.89376	10.8962	18.8797	13.8576
ENSMUSG00000021610	0.585043	5.42337	72.7477	0.00152505	CLPTM1-like [Source:MGI Symbol;Acc:MGI:2442892]	Clptm1l	46.5862	50.3579	50.4582	34.6696	31.7974	31.6745
ENSMUSG00000109941	0.58015	5.3783	6.30596	0.0450328	exosome component 6 [Source:MGI Symbol;Acc:MGI:1919794]	Exosc6	60.463	43.446	38.5857	23.7735	33.7848	37.6134
ENSMUSG00000060036	0.579386	4.90881	7.89168	0.030113	ribosomal protein L3 [Source:MGI Symbol;Acc:MGI:1351605]	Rpl3	41.6302	31.5971	27.7025	17.8301	22.8544	26.7253
ENSMUSG00000042363	0.578936	4.69563	16.8152	0.0162081	lectin, galactoside binding-like [Source:MGI Symbol;Acc:MGI:1916114]	Lgalsl	28.7447	32.5845	24.7344	18.8207	16.8924	21.7762
ENSMUSG00000020834	0.559105	4.9556	78.7418	0.0105456	dehydrogenase/reductase (SDR family) member 13 [Source:MGI Symbol;Acc:MGI:1917701]	Dhrs13	34.6919	33.5719	35.6175	23.7735	23.8481	22.766
ENSMUSG00000045275	0.558226	4.43443	9.68394	0.0353835	Leber congenital amaurosis 5-like [Source:MGI Symbol;Acc:MGI:3041157]	Lca5l	22.7975	27.6475	19.7875	15.849	12.9177	18.8067
ENSMUSG00000023067	0.557065	8.58589	9.51447	0.0209706	cyclin-dependent kinase inhibitor 1A (P21) [Source:MGI Symbol;Acc:MGI:104556]	Cdkn1a	558.044	398.913	408.612	246.65	344.803	336.541
ENSMUSG00000052155	-0.582303	3.92459	44.2347	0.0712285	activin receptor IIA [Source:MGI Symbol;Acc:MGI:102806]	Acvr2a	10.9032	10.8615	9.89376	14.8584	15.8987	16.8271
ENSMUSG00000062519	-0.581933	3.84397	74.2441	0.0806837	zinc finger protein 398 [Source:MGI Symbol;Acc:MGI:1917856]	Zfp398	9.91196	9.8741	9.89376	14.8584	14.905	14.8474
ENSMUSG00000059689	-0.578989	3.35522	10.342	0.15381	zinc finger protein 637 [Source:MGI Symbol;Acc:MGI:2448537]	Zfp637	5.94718	5.92446	7.91501	10.8962	10.9304	7.91862
ENSMUSG00000033985	-0.576801	3.10147	4.16867	0.202085	testis-specific kinase 2 [Source:MGI Symbol;Acc:MGI:2385204]	Tesk2	5.94718	3.94964	5.93626	5.94336	10.9304	6.92879
ENSMUSG00000054519	-0.576801	3.10147	18.6486	0.202085	zinc finger protein 867 [Source:MGI Symbol;Acc:MGI:2681848]	Zfp867	4.95598	4.93705	5.93626	7.92448	8.94303	6.92879
ENSMUSG00000020018	0.54736	4.40102	54.4136	0.0415625	small nuclear ribonucleoprotein polypeptide F [Source:MGI Symbol;Acc:MGI:1917128]	Snrpf	21.8063	22.7104	23.745	15.849	15.8987	14.8474
ENSMUSG00000047420	-0.575248	2.95561	15.3303	0.232773	family with sequence similarity 180, member A [Source:MGI Symbol;Acc:MGI:3039626]	Fam180a	3.96479	4.93705	4.94688	7.92448	6.95569	5.93897
ENSMUSG00000043079	-0.575248	2.95561	15.5419	0.232773	synaptopodin [Source:MGI Symbol;Acc:MGI:1099446]	Synpo	3.96479	4.93705	4.94688	7.92448	5.96202	6.92879
ENSMUSG00000070883	-0.573191	2.79334	7.65691	0.269276	coiled-coil domain containing 173 [Source:MGI Symbol;Acc:MGI:1923100]	Ccdc173	4.95598	2.96223	3.9575	4.9528	6.95569	5.93897
ENSMUSG00000071656	-0.573191	2.79334	7.65691	0.269276	LRRN4 C-terminal like [Source:MGI Symbol;Acc:MGI:1916102]	Lrrn4cl	4.95598	2.96223	3.9575	4.9528	6.95569	5.93897
ENSMUSG00000041064	0.545529	4.67714	32.5597	0.0242932	PIF1 5'-to-3' DNA helicase [Source:MGI Symbol;Acc:MGI:2143057]	Pif1	29.7359	25.6726	28.6919	17.8301	20.8671	18.8067
ENSMUSG00000027827	-0.570336	2.61048	8.75948	0.313226	potassium voltage-gated channel, shaker-related subfamily, beta member 1 [Source:MGI Symbol;Acc:MGI:109155]	Kcnab1	2.97359	2.96223	3.9575	4.9528	5.96202	3.95931
ENSMUSG00000074166	-0.570336	2.61048	8.98687	0.313226	expressed sequence AW146154 [Source:MGI Symbol;Acc:MGI:2142212]	AW146154	2.97359	3.94964	2.96813	5.94336	3.97468	4.94914
ENSMUSG00000074829	-0.570336	2.61048	8.98687	0.313226	RIKEN cDNA 2010315B03 gene [Source:MGI Symbol;Acc:MGI:1919321]	2010315B03Rik	2.97359	3.94964	2.96813	5.94336	3.97468	4.94914
ENSMUSG00000070803	0.539649	4.47783	41.2353	0.0385785	Cbp/p300-interacting transactivator, with Glu/Asp-rich carboxy-terminal domain, 4 [Source:MGI Symbol;Acc:MGI:1861694]	Cited4	24.7799	22.7104	24.7344	15.849	17.8861	15.8372
ENSMUSG00000020752	0.537871	4.42339	41.8233	0.0433697	RecQ protein-like 5 [Source:MGI Symbol;Acc:MGI:2156841]	Recql5	23.7887	21.723	23.745	15.849	16.8924	14.8474
ENSMUSG00000003452	-0.563519	3.70481	19.1858	0.109245	bicaudal D homolog 1 (Drosophila) [Source:MGI Symbol;Acc:MGI:1101760]	Bicd1	9.91196	7.89928	8.90438	11.8867	14.905	12.8678
ENSMUSG00000036478	-0.561579	3.61048	15.3602	0.12433	B cell translocation gene 1, anti-proliferative [Source:MGI Symbol;Acc:MGI:88215]	Btg1	8.92077	6.91187	8.90438	11.8867	13.9114	10.8881
ENSMUSG00000009927	0.531403	9.0079	11.0563	0.015422	ribosomal protein S25 [Source:MGI Symbol;Acc:MGI:1922867]	Rps25	702.758	505.554	610.445	355.611	493.854	408.799
ENSMUSG00000073563	-0.559303	3.50955	6.71974	0.141761	casein kinase 1, gamma 3 [Source:MGI Symbol;Acc:MGI:1917675]	Csnk1g3	7.92957	5.92446	8.90438	10.8962	13.9114	8.90845
ENSMUSG00000078794	0.528226	5.18237	27.6132	0.00860046	dishevelled-binding antagonist of beta-catenin 3 [Source:MGI Symbol;Acc:MGI:3654828]	Dact3	43.6126	41.4712	36.6069	25.7546	27.8228	30.6847
ENSMUSG00000054770	-0.556597	3.40103	15.9493	0.161984	potassium channel tetramerisation domain containing 18 [Source:MGI Symbol;Acc:MGI:3603813]	Kctd18	7.92957	5.92446	6.92563	8.91505	10.9304	10.8881
ENSMUSG00000024790	0.52673	4.81887	10.9536	0.0218223	SAC3 domain containing 1 [Source:MGI Symbol;Acc:MGI:1913656]	Sac3d1	36.6743	27.6475	28.6919	17.8301	23.8481	22.766
ENSMUSG00000029229	-0.554271	3.98599	52.2322	0.0783345	cysteine-rich hydrophobic domain 2 [Source:MGI Symbol;Acc:MGI:1921527]	Chic2	10.9032	11.8489	10.8831	16.8395	15.8987	16.8271
ENSMUSG00000029089	-0.553326	3.28367	31.2707	0.185557	RIKEN cDNA 5730480H06 gene [Source:MGI Symbol;Acc:MGI:1917842]	5730480H06Rik	5.94718	6.91187	5.93626	9.90561	8.94303	8.90845
ENSMUSG00000034040	-0.549291	3.15592	5.97019	0.2132	Williams-Beuren syndrome chromosome region 17 homolog (human) [Source:MGI Symbol;Acc:MGI:2137594]	Wbscr17	5.94718	3.94964	6.92563	7.92448	9.9367	6.92879
ENSMUSG00000070337	-0.549291	3.15591	25.8484	0.2132	G protein-coupled receptor 179 [Source:MGI Symbol;Acc:MGI:2443409]	Gpr179	5.94718	4.93705	5.93626	7.92448	8.94303	7.91862
ENSMUSG00000056267	-0.546069	4.15592	70.0751	0.063946	centrosomal protein 70 [Source:MGI Symbol;Acc:MGI:1915371]	Cep70	12.8856	12.8363	12.8619	18.8207	18.8797	18.8067
ENSMUSG00000028957	-0.546069	4.15591	8.03534	0.063946	period circadian clock 3 [Source:MGI Symbol;Acc:MGI:1277134]	Per3	10.9032	15.7986	11.8725	20.8018	14.905	20.7864
ENSMUSG00000040599	-0.54391	3.64895	27.9633	0.13038	MIS12 kinetochore complex component [Source:MGI Symbol;Acc:MGI:1914389]	Mis12	7.92957	8.88669	8.90438	13.8678	11.924	11.8779
ENSMUSG00000031381	-0.54391	3.64896	6.23828	0.13038	phosphatidylinositol glycan anchor biosynthesis, class A [Source:MGI Symbol;Acc:MGI:99461]	Piga	10.9032	6.91187	7.91501	9.90561	14.905	12.8678
ENSMUSG00000027353	0.524951	4.77605	47.4859	0.0244525	minichromosome maintenance 8 homologous recombination repair factor [Source:MGI Symbol;Acc:MGI:1913884]	Mcm8	29.7359	28.6349	31.66	20.8018	21.8607	19.7966
ENSMUSG00000022702	0.514875	5.14248	58.3211	0.0115619	histone cell cycle regulator [Source:MGI Symbol;Acc:MGI:99430]	Hira	39.6479	37.5216	40.5644	26.7451	28.8164	26.7253
ENSMUSG00000044328	-0.54126	4.01574	7.12536	0.0818911	transformation related protein 53 inducible protein 13 [Source:MGI Symbol;Acc:MGI:1915125]	Trp53i13	13.8767	10.8615	9.89376	12.8773	17.8861	19.7966
ENSMUSG00000026925	-0.54024	3.55077	25.2776	0.148708	inositol polyphosphate-5-phosphatase E [Source:MGI Symbol;Acc:MGI:1927753]	Inpp5e	6.93837	8.88669	7.91501	11.8867	10.9304	11.8779
ENSMUSG00000023915	-0.537537	2.86046	3.67212	0.284811	tumor necrosis factor receptor superfamily, member 21 [Source:MGI Symbol;Acc:MGI:2151075]	Tnfrsf21	2.97359	3.94964	5.93626	7.92448	5.96202	4.94914
ENSMUSG00000054728	-0.537537	2.86046	18.2936	0.284811	phosphatase and actin regulator 1 [Source:MGI Symbol;Acc:MGI:2659021]	Phactr1	4.95598	3.94964	3.9575	5.94336	5.96202	6.92879
ENSMUSG00000041264	-0.537366	4.24652	17.3848	0.0590466	ubiquitin specific peptidase like 1 [Source:MGI Symbol;Acc:MGI:2442342]	Uspl1	14.8679	14.8111	11.8725	18.8207	18.8797	22.766
ENSMUSG00000047379	0.514222	5.45086	17.5204	0.00551873	beta-1,4-glucuronyltransferase 1 [Source:MGI Symbol;Acc:MGI:1919680]	B4gat1	44.6038	47.3957	55.4051	37.6413	35.7721	29.6948
ENSMUSG00000043241	-0.537062	5.85223	3.74066	0.100279	UPF2 regulator of nonsense transcripts homolog (yeast) [Source:MGI Symbol;Acc:MGI:2449307]	Upf2	31.7183	53.3201	51.4476	89.1505	53.6582	55.4303
ENSMUSG00000030554	0.513062	5.2212	14.0558	0.00960835	synemin, intermediate filament protein [Source:MGI Symbol;Acc:MGI:2661187]	Synm	44.6038	35.5467	44.5219	26.7451	33.7848	26.7253
ENSMUSG00000036599	0.504978	5.53544	24.0044	0.00428627	carbohydrate sulfotransferase 12 [Source:MGI Symbol;Acc:MGI:1929064]	Chst12	57.4894	48.3831	50.4582	32.6885	39.7468	37.6134
ENSMUSG00000045039	0.498355	5.7717	29.272	0.00214844	multiple EGF-like-domains 8 [Source:MGI Symbol;Acc:MGI:2446294]	Megf8	66.4102	56.2823	62.3307	40.613	47.6961	42.5626
ENSMUSG00000062619	0.495176	5.78039	38.3956	0.00221989	RIKEN cDNA 2310039H08 gene [Source:MGI Symbol;Acc:MGI:1914351]	2310039H08Rik	66.4102	58.2572	61.3413	40.613	46.7025	44.5422
ENSMUSG00000034165	0.494686	6.1391	28.8039	0.00160749	cyclin D3 [Source:MGI Symbol;Acc:MGI:88315]	Ccnd3	88.2165	77.0179	75.1926	51.5092	58.6265	60.3795
ENSMUSG00000054715	-0.530693	3.33176	29.2984	0.1948	zinc finger and SCAN domain containing 22 [Source:MGI Symbol;Acc:MGI:2443312]	Zscan22	5.94718	6.91187	6.92563	9.90561	9.9367	8.90845
ENSMUSG00000036534	-0.528855	4.04489	13.9277	0.0854461	solute carrier family 38, member 7 [Source:MGI Symbol;Acc:MGI:2679005]	Slc38a7	13.8767	10.8615	10.8831	14.8584	18.8797	17.8169
ENSMUSG00000046169	-0.528496	2.68643	13.7934	0.331881	a disintegrin-like and metallopeptidase (reprolysin type) with thrombospondin type 1 motif, 6 [Source:MGI Symbol;Acc:MGI:1347348]	Adamts6	2.97359	3.94964	3.9575	5.94336	4.96835	4.94914
ENSMUSG00000062931	-0.528496	2.68643	13.7934	0.331881	zinc finger protein 938 [Source:MGI Symbol;Acc:MGI:3621440]	Zfp938	2.97359	3.94964	3.9575	5.94336	4.96835	4.94914
ENSMUSG00000061371	-0.528496	2.68643	13.3489	0.331881	zinc finger protein 873 [Source:MGI Symbol;Acc:MGI:3040689]	Zfp873	3.96479	2.96223	3.9575	4.9528	5.96202	4.94914
ENSMUSG00000074698	-0.528496	2.68643	13.3489	0.331881	casein kinase 2, alpha 1 polypeptide [Source:MGI Symbol;Acc:MGI:88543]	Csnk2a1	3.96479	2.96223	3.9575	4.9528	5.96202	4.94914
ENSMUSG00000032333	-0.528496	2.68643	13.7214	0.331881	stomatin-like 1 [Source:MGI Symbol;Acc:MGI:1916356]	Stoml1	3.96479	3.94964	2.96813	4.9528	4.96835	5.93897
ENSMUSG00000063535	-0.528496	2.68643	13.7214	0.331881	zinc finger protein 773 [Source:MGI Symbol;Acc:MGI:1923623]	Zfp773	3.96479	3.94964	2.96813	4.9528	4.96835	5.93897
ENSMUSG00000019102	-0.528496	2.68643	4.29669	0.331881	aldehyde dehydrogenase family 3, subfamily A1 [Source:MGI Symbol;Acc:MGI:1353451]	Aldh3a1	4.95598	2.96223	2.96813	3.96224	5.96202	5.93897
ENSMUSG00000048583	-0.528496	2.68643	4.98721	0.331881	insulin-like growth factor 2 [Source:MGI Symbol;Acc:MGI:96434]	Igf2	3.96479	3.94964	2.96813	3.96224	4.96835	6.92879
ENSMUSG00000029468	0.490954	5.7139	20.605	0.00373758	purinergic receptor P2X, ligand-gated ion channel, 7 [Source:MGI Symbol;Acc:MGI:1339957]	P2rx7	66.4102	54.3075	56.3944	37.6413	44.7151	43.5524
ENSMUSG00000015363	0.485949	4.97087	8.77325	0.0250672	TraB domain containing [Source:MGI Symbol;Acc:MGI:1915226]	Trabd	39.6479	34.5593	28.6919	20.8018	23.8481	28.705
ENSMUSG00000039745	0.483045	5.26519	19.2635	0.013153	HIV-1 Tat interactive protein 2 [Source:MGI Symbol;Acc:MGI:1859271]	Htatip2	40.6391	47.3957	39.575	31.6979	26.8291	32.6643
ENSMUSG00000049775	-0.525714	8.4738	5.42286	0.0578742	thymosin, beta 4, X chromosome [Source:MGI Symbol;Acc:MGI:99510]	Tmsb4x	220.046	349.543	299.781	529.95	333.873	388.012
ENSMUSG00000070565	-0.525344	3.97088	14.1534	0.0968567	RAS protein activator like 2 [Source:MGI Symbol;Acc:MGI:2443881]	Rasal2	9.91196	12.8363	10.8831	17.8301	13.9114	16.8271
ENSMUSG00000075227	0.477206	4.85223	30.4391	0.0351467	zinc finger, HIT domain containing 2 [Source:MGI Symbol;Acc:MGI:1352481]	Znhit2	33.7007	30.6097	29.6813	20.8018	22.8544	23.7559
ENSMUSG00000033722	0.474528	4.90882	8.36331	0.0324271	cDNA sequence BC034090 [Source:MGI Symbol;Acc:MGI:2672904]	BC034090	35.6831	26.6601	35.6175	21.7923	27.8228	20.7864
ENSMUSG00000040213	-0.523085	4.41225	29.6008	0.050259	kynurenine aminotransferase 3 [Source:MGI Symbol;Acc:MGI:2677849]	Kyat3	14.8679	16.786	15.83	24.764	20.8671	22.766
ENSMUSG00000043467	-0.522452	3.59085	26.725	0.155541	zinc finger and BTB domain containing 37 [Source:MGI Symbol;Acc:MGI:2444467]	Zbtb37	7.92957	7.89928	8.90438	12.8773	11.924	10.8881
ENSMUSG00000056493	0.46558	5.98596	51.9884	0.0019484	forkhead box K1 [Source:MGI Symbol;Acc:MGI:1347488]	Foxk1	67.4014	72.0809	74.2032	54.4808	50.6772	49.4914
ENSMUSG00000028673	0.465104	5.42338	27.712	0.0114226	fucosidase, alpha-L- 1, tissue [Source:MGI Symbol;Acc:MGI:95593]	Fuca1	51.5422	44.4334	46.5007	31.6979	36.7658	34.644
ENSMUSG00000057719	-0.516898	3.81042	48.4671	0.124952	SH3 domain containing ring finger 2 [Source:MGI Symbol;Acc:MGI:2444628]	Sh3rf2	9.91196	9.8741	9.89376	13.8678	14.905	13.8576
ENSMUSG00000060227	-0.516898	3.81042	18.8301	0.124952	cancer susceptibility candidate 4 [Source:MGI Symbol;Acc:MGI:2443129]	Casc4	8.92077	9.8741	10.8831	15.849	13.9114	12.8678
ENSMUSG00000024293	-0.516364	3.07345	7.79605	0.258346	establishment of sister chromatid cohesion N-acetyltransferase 1 [Source:MGI Symbol;Acc:MGI:1925055]	Esco1	3.96479	5.92446	5.93626	8.91505	6.95569	6.92879
ENSMUSG00000027470	-0.516364	3.07345	21.3479	0.258346	myosin, light polypeptide kinase 2, skeletal muscle [Source:MGI Symbol;Acc:MGI:2139434]	Mylk2	5.94718	4.93705	4.94688	6.93392	7.94936	7.91862
ENSMUSG00000031150	-0.516364	3.07345	21.3479	0.258346	coiled-coil domain containing 120 [Source:MGI Symbol;Acc:MGI:1859619]	Ccdc120	5.94718	4.93705	4.94688	6.93392	7.94936	7.91862
ENSMUSG00000070003	-0.516364	3.07345	4.84312	0.258346	single stranded DNA binding protein 4 [Source:MGI Symbol;Acc:MGI:1924150]	Ssbp4	4.95598	6.91187	3.9575	7.92448	5.96202	8.90845
ENSMUSG00000020072	-0.515498	2.48849	17.9807	0.38981	phenazine biosynthesis-like protein domain containing 2 [Source:MGI Symbol;Acc:MGI:1914557]	Pbld2	2.97359	2.96223	2.96813	3.96224	4.96835	3.95931
ENSMUSG00000055305	-0.515498	2.48849	18.5512	0.38981	zinc finger protein 93 [Source:MGI Symbol;Acc:MGI:107611]	Zfp93	2.97359	2.96223	2.96813	3.96224	3.97468	4.94914
ENSMUSG00000001507	0.463941	7.18891	19.828	0.00410414	integrin alpha 3 [Source:MGI Symbol;Acc:MGI:96602]	Itga3	187.336	157.986	155.332	106.981	127.19	128.678
ENSMUSG00000026889	-0.514213	4.43445	23.591	0.0522288	RNA binding motif protein 18 [Source:MGI Symbol;Acc:MGI:1915139]	Rbm18	15.8591	17.7734	14.8406	23.7735	20.8671	24.7457
ENSMUSG00000049907	0.463085	5.79333	50.1832	0.00401748	RAS-like, family 11, member B [Source:MGI Symbol;Acc:MGI:1916189]	Rasl11b	65.419	61.2194	59.3626	42.5941	45.7088	46.5219
ENSMUSG00000028919	0.459989	6.19867	91.0932	0.000960728	Rho guanine nucleotide exchange factor (GEF) 19 [Source:MGI Symbol;Acc:MGI:1925912]	Arhgef19	85.2429	81.955	81.1288	58.4431	60.6139	61.3693
ENSMUSG00000062151	-0.511759	3.72295	7.90315	0.142256	unc-13 homolog C (C. elegans) [Source:MGI Symbol;Acc:MGI:2149021]	Unc13c	7.92957	8.88669	10.8831	15.849	12.9177	10.8881
ENSMUSG00000028669	0.456259	4.86045	20.9209	0.0432296	PITH (C-terminal proteasome-interacting domain of thioredoxin-like) domain containing 1 [Source:MGI Symbol;Acc:MGI:1913443]	Pithd1	29.7359	29.6223	34.6282	23.7735	23.8481	20.7864
ENSMUSG00000027835	-0.509866	3.37831	53.0659	0.203785	programmed cell death 10 [Source:MGI Symbol;Acc:MGI:1928396]	Pdcd10	6.93837	6.91187	6.92563	9.90561	9.9367	9.89828
ENSMUSG00000055240	-0.509866	3.3783	7.86186	0.203785	zinc finger protein 101 [Source:MGI Symbol;Acc:MGI:107547]	Zfp101	5.94718	7.89928	6.92563	11.8867	7.94936	9.89828
ENSMUSG00000056260	-0.50828	3.92458	10.0751	0.114472	ligand dependent nuclear receptor interacting factor 1 [Source:MGI Symbol;Acc:MGI:2445214]	Lrif1	8.92077	12.8363	10.8831	17.8301	13.9114	14.8474
ENSMUSG00000055471	-0.506122	2.92459	9.94882	0.299439	anaplastic lymphoma kinase [Source:MGI Symbol;Acc:MGI:103305]	Alk	3.96479	4.93705	4.94688	7.92448	5.96202	5.93897
ENSMUSG00000020137	-0.506122	2.92458	4.74893	0.299439	THAP domain containing, apoptosis associated protein 2 [Source:MGI Symbol;Acc:MGI:1914066]	Thap2	3.96479	5.92446	3.9575	7.92448	4.96835	6.92879
ENSMUSG00000049148	-0.506122	2.92458	4.754	0.299439	phosphatidylinositol-specific phospholipase C, X domain containing 3 [Source:MGI Symbol;Acc:MGI:2442605]	Plcxd3	3.96479	5.92446	3.9575	6.93392	4.96835	7.91862
ENSMUSG00000035246	-0.506122	2.92459	4.66045	0.299439	phosphate cytidylyltransferase 1, choline, beta isoform [Source:MGI Symbol;Acc:MGI:2147987]	Pcyt1b	5.94718	3.94964	3.9575	4.9528	6.95569	7.91862
ENSMUSG00000057706	-0.505817	3.62985	15.9046	0.162256	mex3 RNA binding family member B [Source:MGI Symbol;Acc:MGI:1918252]	Mex3b	9.91196	7.89928	7.91501	10.8962	12.9177	12.8678
ENSMUSG00000040451	-0.505702	4.10146	8.97101	0.0925403	sphingomyelin synthase 1 [Source:MGI Symbol;Acc:MGI:2444110]	Sgms1	11.8944	14.8111	10.8831	17.8301	14.905	20.7864
ENSMUSG00000057551	-0.505642	4.45631	11.8478	0.0542102	zinc finger protein 317 [Source:MGI Symbol;Acc:MGI:107775]	Zfp317	14.8679	15.7986	18.7981	26.7451	23.8481	19.7966
ENSMUSG00000042178	0.452025	5.62502	38.6734	0.00818183	armadillo repeat containing 5 [Source:MGI Symbol;Acc:MGI:2384586]	Armc5	58.4806	52.3327	53.4263	37.6413	41.7341	40.5829
ENSMUSG00000020440	0.450024	6.83564	24.4264	0.00244985	ADP-ribosylation factor 5 [Source:MGI Symbol;Acc:MGI:99434]	Arf5	142.732	122.439	123.672	85.1882	100.361	98.9828
ENSMUSG00000035597	-0.501043	4.03038	9.31392	0.104866	pre-mRNA processing factor 39 [Source:MGI Symbol;Acc:MGI:104602]	Prpf39	9.91196	13.8237	11.8725	19.8112	14.905	15.8372
ENSMUSG00000028454	0.449103	4.9324	54.5426	0.0409974	phosphatidylinositol glycan anchor biosynthesis, class O [Source:MGI Symbol;Acc:MGI:1861452]	Pigo	33.7007	32.5845	32.6494	23.7735	24.8417	23.7559
ENSMUSG00000004846	0.4474	7.11181	33.5684	0.00107665	procollagen-lysine, 2-oxoglutarate 5-dioxygenase 3 [Source:MGI Symbol;Acc:MGI:1347008]	Plod3	163.547	144.162	164.236	110.943	125.202	109.871
ENSMUSG00000044548	-0.498869	3.53031	12.6521	0.185464	dishevelled-binding antagonist of beta-catenin 1 [Source:MGI Symbol;Acc:MGI:1891740]	Dact1	6.93837	8.88669	7.91501	12.8773	9.9367	10.8881
ENSMUSG00000027016	-0.498869	3.5303	6.3497	0.185464	zinc finger protein 385B [Source:MGI Symbol;Acc:MGI:2444734]	Zfp385b	6.93837	9.8741	6.92563	11.8867	8.94303	12.8678
ENSMUSG00000060671	-0.497088	3.75858	9.48976	0.148077	ATPase, class I, type 8B, member 2 [Source:MGI Symbol;Acc:MGI:1859660]	Atp8b2	10.9032	9.8741	7.91501	11.8867	12.9177	15.8372
ENSMUSG00000020733	0.443642	6.05206	11.0728	0.015374	solute carrier family 9 (sodium/hydrogen exchanger), member 3 regulator 1 [Source:MGI Symbol;Acc:MGI:1349482]	Slc9a3r1	85.2429	71.0935	66.2882	46.5563	56.6392	60.3795
ENSMUSG00000039512	0.438217	5.86863	16.1792	0.0066495	UHRF1 (ICBP90) binding protein 1 [Source:MGI Symbol;Acc:MGI:3041238]	Uhrf1bp1	69.3837	57.2698	68.2669	44.5752	53.6582	45.5321
ENSMUSG00000026649	-0.492458	2.75858	22.3005	0.349122	cilia and flagella associated protein 126 [Source:MGI Symbol;Acc:MGI:1922722]	Cfap126	3.96479	3.94964	3.9575	4.9528	5.96202	5.93897
ENSMUSG00000033491	-0.491285	3.12895	2.7288	0.270275	protease, serine 35 [Source:MGI Symbol;Acc:MGI:2444800]	Prss35	5.94718	3.94964	6.92563	6.93392	10.9304	5.93897
ENSMUSG00000027208	-0.491285	3.12895	26.9238	0.270275	fibroblast growth factor 7 [Source:MGI Symbol;Acc:MGI:95521]	Fgf7	5.94718	5.92446	4.94688	7.92448	7.94936	7.91862
ENSMUSG00000022431	-0.491285	3.12894	14.3936	0.270275	RIB43A domain with coiled-coils 2 [Source:MGI Symbol;Acc:MGI:1914997]	Ribc2	4.95598	5.92446	5.93626	8.91505	6.95569	7.91862
ENSMUSG00000001827	-0.491285	3.12895	5.273	0.270275	folate receptor 1 (adult) [Source:MGI Symbol;Acc:MGI:95568]	Folr1	6.93837	4.93705	4.94688	5.94336	8.94303	8.90845
ENSMUSG00000029068	0.437756	5.01573	22.195	0.0399405	cyclin L2 [Source:MGI Symbol;Acc:MGI:1927119]	Ccnl2	36.6743	31.5971	36.6069	24.764	27.8228	24.7457
ENSMUSG00000028329	-0.489938	3.87676	6.03333	0.135178	xeroderma pigmentosum, complementation group A [Source:MGI Symbol;Acc:MGI:99135]	Xpa	12.8856	9.8741	8.90438	11.8867	14.905	17.8169
ENSMUSG00000026739	-0.489342	4.49906	13.584	0.0582033	Bmi1 polycomb ring finger oncogene [Source:MGI Symbol;Acc:MGI:88174]	Bmi1	15.8591	19.7482	15.83	25.7546	20.8671	25.7355
ENSMUSG00000038776	0.437209	8.08309	138.765	1.94912e-05	epoxide hydrolase 1, microsomal [Source:MGI Symbol;Acc:MGI:95405]	Ephx1	318.174	307.084	303.738	222.876	230.531	232.609
ENSMUSG00000028416	-0.487376	5.986	5.77297	0.0522573	BCL2-associated athanogene 1 [Source:MGI Symbol;Acc:MGI:108047]	Bag1	40.6391	51.3453	61.3413	88.1599	68.5632	58.3998
ENSMUSG00000002279	0.433778	4.97844	10.5412	0.0446135	lipase maturation factor 1 [Source:MGI Symbol;Acc:MGI:1923733]	Lmf1	29.7359	33.5719	38.5857	27.7357	25.8354	21.7762
ENSMUSG00000025384	0.433584	5.48317	11.7648	0.0158854	Fanconi anemia core complex associated protein 100 [Source:MGI Symbol;Acc:MGI:1919135]	Faap100	56.4982	45.4208	45.5113	31.6979	38.7531	38.6033
ENSMUSG00000025175	-0.48452	4.15591	44.0665	0.0995981	fructosamine 3 kinase [Source:MGI Symbol;Acc:MGI:1926834]	Fn3k	12.8856	13.8237	12.8619	18.8207	17.8861	18.8067
ENSMUSG00000028410	-0.48452	4.15591	5.65914	0.0995981	DnaJ heat shock protein family (Hsp40) member A1 [Source:MGI Symbol;Acc:MGI:1270129]	Dnaja1	10.9032	15.7986	12.8619	22.7829	14.905	17.8169
ENSMUSG00000030966	-0.482235	3.57095	30.5128	0.192946	tripartite motif-containing 21 [Source:MGI Symbol;Acc:MGI:106657]	Trim21	7.92957	8.88669	7.91501	11.8867	10.9304	11.8779
ENSMUSG00000051851	-0.482235	3.57095	6.14311	0.192946	CAAX box 1C [Source:MGI Symbol;Acc:MGI:1920115]	Cxx1c	6.93837	9.8741	7.91501	12.8773	8.94303	12.8678
ENSMUSG00000041801	0.432308	6.57843	45.1614	0.000483945	pleckstrin homology like domain, family A, member 3 [Source:MGI Symbol;Acc:MGI:1351485]	Phlda3	112.996	101.703	107.842	75.2826	84.4619	79.1862
ENSMUSG00000034575	-0.481586	4.51997	43.747	0.0602128	PAP associated domain containing 7 [Source:MGI Symbol;Acc:MGI:2682295]	Papd7	16.8503	17.7734	17.8088	25.7546	23.8481	23.7559
ENSMUSG00000090110	-0.480724	3.30792	9.59438	0.244235	C-x(9)-C motif containing 4 [Source:MGI Symbol;Acc:MGI:5637812]	Cmc4	5.94718	5.92446	7.91501	9.90561	9.9367	7.91862
ENSMUSG00000054619	-0.480724	3.30791	9.86155	0.244235	methyltransferase like 7A1 [Source:MGI Symbol;Acc:MGI:1916523]	Mettl7a1	5.94718	7.89928	5.93626	9.90561	7.94936	9.89828
ENSMUSG00000031931	-0.480724	3.30792	9.54595	0.244235	ankyrin repeat domain 49 [Source:MGI Symbol;Acc:MGI:1930842]	Ankrd49	7.92957	5.92446	5.93626	7.92448	9.9367	9.89828
ENSMUSG00000038930	-0.478226	2.98599	3.61741	0.313235	RCC1 domain containing 1 [Source:MGI Symbol;Acc:MGI:2444156]	Rccd1	4.95598	3.94964	5.93626	6.93392	8.94303	4.94914
ENSMUSG00000026768	-0.477501	3.90883	4.8059	0.140209	integrin alpha 8 [Source:MGI Symbol;Acc:MGI:109442]	Itga8	9.91196	8.88669	13.8513	15.849	17.8861	11.8779
ENSMUSG00000022526	-0.477501	3.90882	9.62331	0.140209	zinc finger protein 251 [Source:MGI Symbol;Acc:MGI:1918841]	Zfp251	9.91196	9.8741	12.8619	15.849	16.8924	12.8678
ENSMUSG00000001630	-0.476083	4.33176	25.7078	0.0834878	serine/threonine kinase 38 like [Source:MGI Symbol;Acc:MGI:1922250]	Stk38l	13.8767	15.7986	15.83	22.7829	20.8671	19.7966
ENSMUSG00000002997	-0.475576	3.7048	25.3335	0.175334	protein kinase, cAMP dependent regulatory, type II beta [Source:MGI Symbol;Acc:MGI:97760]	Prkar2b	8.92077	9.8741	8.90438	12.8773	11.924	13.8576
ENSMUSG00000049164	-0.475576	3.7048	25.3335	0.175334	zinc finger protein 518A [Source:MGI Symbol;Acc:MGI:1919922]	Zfp518a	8.92077	9.8741	8.90438	12.8773	11.924	13.8576
ENSMUSG00000040594	-0.475576	3.70481	11.6473	0.175334	RAN binding protein 17 [Source:MGI Symbol;Acc:MGI:1929706]	Ranbp17	9.91196	9.8741	7.91501	11.8867	11.924	14.8474
ENSMUSG00000024769	0.431693	5.80616	10.6229	0.0167609	CDC42 binding protein kinase gamma (DMPK-like) [Source:MGI Symbol;Acc:MGI:2652845]	Cdc42bpg	71.3661	55.2949	59.3626	39.6224	50.6772	47.5117
ENSMUSG00000066456	-0.47459	4.18239	5.31015	0.103108	high mobility group nucleosomal binding domain 3 [Source:MGI Symbol;Acc:MGI:2138069]	Hmgn3	10.9032	12.8363	16.8194	21.7923	19.8734	14.8474
ENSMUSG00000035151	-0.474075	4.54058	29.2901	0.0622297	ELMO/CED-12 domain containing 2 [Source:MGI Symbol;Acc:MGI:2445165]	Elmod2	17.8415	16.786	18.7981	25.7546	25.8354	22.766
ENSMUSG00000055148	-0.473309	2.57095	9.28426	0.410279	Kruppel-like factor 2 (lung) [Source:MGI Symbol;Acc:MGI:1342772]	Klf2	2.97359	2.96223	3.9575	4.9528	4.96835	3.95931
ENSMUSG00000026826	-0.473309	2.57095	9.2389	0.410279	nuclear receptor subfamily 4, group A, member 2 [Source:MGI Symbol;Acc:MGI:1352456]	Nr4a2	3.96479	2.96223	2.96813	3.96224	4.96835	4.94914
ENSMUSG00000044854	-0.473309	2.57095	9.2389	0.410279	RIKEN cDNA 1700056E22 gene [Source:MGI Symbol;Acc:MGI:1920613]	1700056E22Rik	3.96479	2.96223	2.96813	3.96224	4.96835	4.94914
ENSMUSG00000044991	-0.473309	2.57095	9.2389	0.410279	RIKEN cDNA 1110034G24 gene [Source:MGI Symbol;Acc:MGI:1920997]	1110034G24Rik	3.96479	2.96223	2.96813	3.96224	4.96835	4.94914
ENSMUSG00000071573	-0.473309	2.57095	9.2389	0.410279	renalase, FAD-dependent amine oxidase [Source:MGI Symbol;Acc:MGI:1915045]	Rnls	3.96479	2.96223	2.96813	3.96224	4.96835	4.94914
ENSMUSG00000079065	-0.472823	3.46711	3.97875	0.221005	cDNA sequence BC005561 [Source:MGI Symbol;Acc:MGI:3040669]	BC005561	5.94718	7.89928	8.90438	13.8678	8.94303	8.90845
ENSMUSG00000062116	-0.472823	3.46712	25.8473	0.221005	zinc finger protein 954 [Source:MGI Symbol;Acc:MGI:1917764]	Zfp954	7.92957	6.91187	7.91501	9.90561	10.9304	10.8881
ENSMUSG00000033685	-0.470832	4.27139	43.5919	0.0942994	uncoupling protein 2 (mitochondrial, proton carrier) [Source:MGI Symbol;Acc:MGI:109354]	Ucp2	14.8679	14.8111	13.8513	19.8112	19.8734	20.7864
ENSMUSG00000047146	-0.47012	4.78473	3.79733	0.0982534	tet methylcytosine dioxygenase 1 [Source:MGI Symbol;Acc:MGI:1098693]	Tet1	15.8591	23.6978	24.7344	38.6319	25.8354	24.7457
ENSMUSG00000028199	-0.469545	4.48849	7.02374	0.0700877	crystallin, zeta [Source:MGI Symbol;Acc:MGI:88527]	Cryz	18.8327	18.7608	13.8513	21.7923	20.8671	28.705
ENSMUSG00000022338	-0.468604	5.39538	5.91335	0.0502113	enhancer of yellow 2 homolog (Drosophila) [Source:MGI Symbol;Acc:MGI:1919286]	Eny2	26.7623	38.509	35.6175	57.4525	39.7468	42.5626
ENSMUSG00000020901	-0.468562	3.18238	2.36024	0.281677	phosphoinositide-3-kinase, regulatory subunit 5, p101 [Source:MGI Symbol;Acc:MGI:2443588]	Pik3r5	5.94718	7.89928	3.9575	7.92448	5.96202	10.8881
ENSMUSG00000032803	0.430696	5.45631	10.5633	0.0176657	carnitine deficiency-associated gene expressed in ventricle 3 [Source:MGI Symbol;Acc:MGI:2448759]	Cdv3	53.5246	41.4712	49.4688	31.6979	40.7405	34.644
ENSMUSG00000005043	0.429573	4.94017	8.15183	0.049845	N-sulfoglucosamine sulfohydrolase (sulfamidase) [Source:MGI Symbol;Acc:MGI:1350341]	Sgsh	27.7535	34.5593	36.6069	28.7263	22.8544	21.7762
ENSMUSG00000020108	0.428899	4.99347	36.107	0.0458342	DNA-damage-inducible transcript 4 [Source:MGI Symbol;Acc:MGI:1921997]	Ddit4	34.6919	32.5845	35.6175	24.764	26.8291	24.7457
ENSMUSG00000040774	-0.466798	4.5609	7.69198	0.0642529	choline/ethanolaminephosphotransferase 1 [Source:MGI Symbol;Acc:MGI:2139793]	Cept1	14.8679	18.7608	20.7769	29.7168	23.8481	21.7762
ENSMUSG00000024395	-0.46669	3.61048	2.31094	0.200259	LIM and senescent cell antigen like domains 2 [Source:MGI Symbol;Acc:MGI:2385067]	Lims2	6.93837	6.91187	11.8725	14.8584	12.9177	7.91862
ENSMUSG00000053801	0.427516	6.7364	19.5283	0.00425831	glutamate-rich WD repeat containing 1 [Source:MGI Symbol;Acc:MGI:2141989]	Grwd1	132.82	110.59	116.746	80.2354	96.386	91.0641
ENSMUSG00000049791	0.426653	5.18892	20.9017	0.0328817	frizzled class receptor 4 [Source:MGI Symbol;Acc:MGI:108520]	Fzd4	42.6214	39.4964	36.6069	26.7451	29.8101	31.6745
ENSMUSG00000049488	-0.465688	3.94018	36.2124	0.145184	transmembrane protein 67 [Source:MGI Symbol;Acc:MGI:1923928]	Tmem67	10.9032	11.8489	10.8831	15.849	14.905	15.8372
ENSMUSG00000075266	-0.465688	3.94018	36.2124	0.145184	centromere protein W [Source:MGI Symbol;Acc:MGI:1913561]	Cenpw	10.9032	11.8489	10.8831	15.849	14.905	15.8372
ENSMUSG00000025488	-0.465065	4.20838	6.76755	0.106604	cytochrome c oxidase subunit VIIIb [Source:MGI Symbol;Acc:MGI:105958]	Cox8b	10.9032	15.7986	14.8406	22.7829	16.8924	17.8169
ENSMUSG00000021420	0.425327	5.31988	27.0583	0.0257121	phenylalanine-tRNA synthetase 2 (mitochondrial) [Source:MGI Symbol;Acc:MGI:1917205]	Fars2	46.5862	42.4586	41.5538	29.7168	33.7848	33.6541
ENSMUSG00000022525	-0.464639	4.43445	8.50986	0.0789877	HRAS-like suppressor [Source:MGI Symbol;Acc:MGI:1351473]	Hrasls	18.8327	16.786	13.8513	19.8112	21.8607	26.7253
ENSMUSG00000035258	-0.463911	4.95561	4.71261	0.0720489	ABI gene family, member 3 (NESH) binding protein [Source:MGI Symbol;Acc:MGI:2444583]	Abi3bp	18.8327	26.6601	27.7025	42.5941	29.8101	28.705
ENSMUSG00000031197	-0.462922	6.3982	5.76394	0.0523926	von Hippel-Lindau binding protein 1 [Source:MGI Symbol;Acc:MGI:1333804]	Vbp1	54.5158	78.9928	74.2032	117.877	81.4809	87.1048
ENSMUSG00000038160	-0.461999	4.29585	9.62936	0.0974197	autophagy related 5 [Source:MGI Symbol;Acc:MGI:1277186]	Atg5	16.8503	14.8111	12.8619	17.8301	19.8734	23.7559
ENSMUSG00000019088	-0.461791	3.74088	31.1806	0.181697	deoxyribonuclease 1-like 1 [Source:MGI Symbol;Acc:MGI:109628]	Dnase1l1	8.92077	9.8741	9.89376	13.8678	12.9177	12.8678
ENSMUSG00000058317	-0.461791	3.74088	30.9864	0.181697	ubiquitin-conjugating enzyme E2E 2 [Source:MGI Symbol;Acc:MGI:2384997]	Ube2e2	9.91196	9.8741	8.90438	12.8773	12.9177	13.8576
ENSMUSG00000035949	-0.46157	3.35522	10.5819	0.253861	F-box and WD-40 domain protein 2 [Source:MGI Symbol;Acc:MGI:1353435]	Fbxw2	6.93837	5.92446	7.91501	8.91505	10.9304	8.90845
ENSMUSG00000037703	-0.46157	3.35522	31.2881	0.253861	leucine zipper, putative tumor suppressor family member 3 [Source:MGI Symbol;Acc:MGI:2656976]	Lzts3	6.93837	6.91187	6.92563	8.91505	9.9367	9.89828
ENSMUSG00000054737	-0.461084	2.82729	8.12484	0.36511	zinc finger protein 182 [Source:MGI Symbol;Acc:MGI:2442220]	Zfp182	3.96479	3.94964	4.94688	5.94336	6.95569	4.94914
ENSMUSG00000060073	-0.461084	2.82729	1.47419	0.36511	proteasome (prosome, macropain) subunit, alpha type 3 [Source:MGI Symbol;Acc:MGI:104883]	Psma3	2.97359	3.94964	5.93626	8.91505	4.96835	3.95931
ENSMUSG00000062526	-0.461084	2.82729	8.19845	0.36511	metallophosphoesterase 1 [Source:MGI Symbol;Acc:MGI:2661311]	Mppe1	4.95598	3.94964	3.9575	4.9528	5.96202	6.92879
ENSMUSG00000039865	-0.461084	2.82729	2.21103	0.36511	solute carrier family 44, member 3 [Source:MGI Symbol;Acc:MGI:2384860]	Slc44a3	5.94718	2.96223	3.9575	3.96224	6.95569	6.92879
ENSMUSG00000022742	0.424032	6.50167	44.1272	0.000694731	coproporphyrinogen oxidase [Source:MGI Symbol;Acc:MGI:104841]	Cpox	103.084	95.7787	105.863	74.292	80.4873	72.2574
ENSMUSG00000051403	0.421888	5.28976	51.8057	0.0286211	protein phosphatase 1, regulatory subunit 37 [Source:MGI Symbol;Acc:MGI:2687042]	Ppp1r37	43.6126	42.4586	41.5538	30.7074	31.7974	32.6643
ENSMUSG00000061288	-0.458699	4.1425	5.6343	0.120629	TAO kinase 3 [Source:MGI Symbol;Acc:MGI:3041177]	Taok3	12.8856	10.8615	15.83	17.8301	21.8607	14.8474
ENSMUSG00000032109	0.42082	5.89687	49.4928	0.00661162	NLR family member X1 [Source:MGI Symbol;Acc:MGI:2429611]	Nlrx1	68.3925	63.1942	66.2882	47.5469	51.6708	48.5016
ENSMUSG00000029314	0.420572	5.48846	13.45	0.0190561	1-acylglycerol-3-phosphate O-acyltransferase 9 [Source:MGI Symbol;Acc:MGI:3603816]	Agpat9	43.6126	54.3075	49.4688	40.613	32.7911	36.6236
ENSMUSG00000054648	-0.457787	3.86045	9.37227	0.165054	zinc finger protein 869 [Source:MGI Symbol;Acc:MGI:1914119]	Zfp869	8.92077	11.8489	10.8831	16.8395	12.9177	13.8576
ENSMUSG00000040483	-0.457787	3.86045	6.68024	0.165054	XIAP associated factor 1 [Source:MGI Symbol;Acc:MGI:3772572]	Xaf1	8.92077	12.8363	9.89376	15.849	11.924	15.8372
ENSMUSG00000022285	-0.457664	4.64896	28.9607	0.0607554	tyrosine 3-monooxygenase/tryptophan 5-monooxygenase activation protein, zeta polypeptide [Source:MGI Symbol;Acc:MGI:109484]	Ywhaz	18.8327	18.7608	20.7769	27.7357	27.8228	24.7457
ENSMUSG00000030539	0.419253	6.51737	10.1212	0.0185117	sema domain, immunoglobulin domain (Ig), transmembrane domain (TM) and short cytoplasmic domain, (semaphorin) 4B [Source:MGI Symbol;Acc:MGI:107559]	Sema4b	116.961	89.8543	100.916	66.3676	86.4493	77.2066
ENSMUSG00000019948	-0.456928	4.45631	28.1911	0.0814951	ARP6 actin-related protein 6 [Source:MGI Symbol;Acc:MGI:1914269]	Actr6	15.8591	16.786	17.8088	24.764	22.8544	21.7762
ENSMUSG00000028295	-0.45578	4.71391	13.9335	0.0557119	small integral membrane protein 8 [Source:MGI Symbol;Acc:MGI:1913541]	Smim8	17.8415	21.723	21.7663	31.6979	26.8291	25.7355
ENSMUSG00000002409	-0.454454	3.97089	6.58165	0.150101	dual-specificity tyrosine-(Y)-phosphorylation regulated kinase 1b [Source:MGI Symbol;Acc:MGI:1330302]	Dyrk1b	13.8767	9.8741	10.8831	12.8773	17.8861	16.8271
ENSMUSG00000060032	0.413666	5.83564	6.88625	0.0386144	H2A histone family, member J [Source:MGI Symbol;Acc:MGI:3606192]	H2afj	73.3485	62.2068	53.4263	39.6224	47.6961	54.4405
ENSMUSG00000024955	0.4132	6.32583	18.7294	0.00470863	estrogen related receptor, alpha [Source:MGI Symbol;Acc:MGI:1346831]	Esrra	97.1372	80.9676	90.0332	61.4148	73.5316	66.3184
ENSMUSG00000023021	0.412892	6.78471	8.34947	0.0270675	ceramide synthase 5 [Source:MGI Symbol;Acc:MGI:1919199]	Cers5	142.732	121.451	106.853	79.2448	93.405	105.912
ENSMUSG00000051224	-0.453284	3.04488	4.56937	0.326268	transcription elongation factor A (SII) N-terminal and central domain containing [Source:MGI Symbol;Acc:MGI:2685236]	Tceanc	3.96479	5.92446	5.93626	8.91505	6.95569	5.93897
ENSMUSG00000064345	-0.453284	3.04488	2.16452	0.326268	mitochondrially encoded NADH dehydrogenase 2 [Source:MGI Symbol;Acc:MGI:102500]	mt-Nd2	3.96479	4.93705	6.92563	9.90561	6.95569	4.94914
ENSMUSG00000046442	0.410972	5.59084	36.5948	0.0174316	protein phosphatase 1E (PP2C domain containing) [Source:MGI Symbol;Acc:MGI:2444096]	Ppm1e	52.5334	50.3579	55.4051	39.6224	41.7341	37.6134
ENSMUSG00000031783	-0.45213	3.64895	4.56281	0.207407	polymerase (RNA) II (DNA directed) polypeptide C [Source:MGI Symbol;Acc:MGI:109299]	Polr2c	6.93837	8.88669	10.8831	14.8584	11.924	9.89828
ENSMUSG00000058706	-0.45213	3.64896	5.44616	0.207407	RIKEN cDNA 0610030E20 gene [Source:MGI Symbol;Acc:MGI:1915614]	0610030E20Rik	9.91196	6.91187	9.89376	10.8962	14.905	10.8881
ENSMUSG00000046351	-0.45213	3.64895	12.0992	0.207407	zinc finger protein 322A [Source:MGI Symbol;Acc:MGI:2442566]	Zfp322a	7.92957	9.8741	8.90438	13.8678	10.9304	11.8779
ENSMUSG00000022159	-0.45213	3.64895	14.465	0.207407	RAB2B, member RAS oncogene family [Source:MGI Symbol;Acc:MGI:1923588]	Rab2b	9.91196	8.88669	7.91501	10.8962	12.9177	12.8678
ENSMUSG00000074797	-0.45213	3.64895	12.0885	0.207407	inosine triphosphatase (nucleoside triphosphate pyrophosphatase) [Source:MGI Symbol;Acc:MGI:96622]	Itpa	8.92077	9.8741	7.91501	11.8867	10.9304	13.8576
ENSMUSG00000031246	-0.451622	6.30188	3.99401	0.0916418	SH3-binding domain glutamic acid-rich protein like [Source:MGI Symbol;Acc:MGI:1930849]	Sh3bgrl	49.5598	78.0054	67.2776	112.924	71.5442	82.1557
ENSMUSG00000020801	-0.451363	4.40103	17.0716	0.0918671	mediator complex subunit 31 [Source:MGI Symbol;Acc:MGI:1914529]	Med31	14.8679	15.7986	17.8088	23.7735	22.8544	19.7966
ENSMUSG00000029402	-0.451363	4.40104	5.64385	0.0918671	small nuclear ribonucleoprotein 35 (U11/U12) [Source:MGI Symbol;Acc:MGI:1923417]	Snrnp35	18.8327	12.8363	16.8194	18.8207	26.8291	20.7864
ENSMUSG00000025821	0.410736	5.32582	51.6189	0.0308154	zinc finger protein 282 [Source:MGI Symbol;Acc:MGI:2141413]	Zfp282	43.6126	44.4334	42.5432	32.6885	31.7974	33.6541
ENSMUSG00000068015	-0.449635	4.73194	10.9162	0.0573725	leucine-rich repeats and calponin homology (CH) domain containing 1 [Source:MGI Symbol;Acc:MGI:2443390]	Lrch1	17.8415	21.723	22.7556	32.6885	26.8291	25.7355
ENSMUSG00000058503	-0.449223	4.16921	7.38008	0.124507	family with sequence similarity 133, member B [Source:MGI Symbol;Acc:MGI:1915402]	Fam133b	10.9032	14.8111	14.8406	21.7923	16.8924	16.8271
ENSMUSG00000073792	-0.449223	4.16921	36.6706	0.124507	asparagine-linked glycosylation 6 (alpha-1,3,-glucosyltransferase) [Source:MGI Symbol;Acc:MGI:2444031]	Alg6	13.8767	12.8363	13.8513	18.8207	18.8797	17.8169
ENSMUSG00000061524	-0.448793	3.77607	13.2152	0.187942	zinc finger protein of the cerebellum 2 [Source:MGI Symbol;Acc:MGI:106679]	Zic2	10.9032	8.88669	9.89376	11.8867	14.905	13.8576
ENSMUSG00000032123	0.409444	6.20837	19.5045	0.00427084	dolichyl-phosphate (UDP-N-acetylglucosamine) acetylglucosaminephosphotransferase 1 (GlcNAc-1-P transferase) [Source:MGI Symbol;Acc:MGI:1196396]	Dpagt1	79.2957	77.0179	90.0332	64.3864	65.5822	55.4303
ENSMUSG00000038550	-0.447875	3.23392	19.0866	0.292586	circadian associated repressor of transcription [Source:MGI Symbol;Acc:MGI:2684975]	Ciart	6.93837	5.92446	5.93626	7.92448	8.94303	8.90845
ENSMUSG00000059142	-0.447875	3.23392	19.0866	0.292586	zinc finger protein 945 [Source:MGI Symbol;Acc:MGI:2445132]	Zfp945	6.93837	5.92446	5.93626	7.92448	8.94303	8.90845
ENSMUSG00000004035	-0.447875	3.23391	4.76229	0.292586	glutathione S-transferase, mu 7 [Source:MGI Symbol;Acc:MGI:1915562]	Gstm7	5.94718	7.89928	4.94688	8.91505	6.95569	9.89828
ENSMUSG00000028933	-0.447875	3.23391	7.52783	0.292586	X-ray repair complementing defective repair in Chinese hamster cells 2 [Source:MGI Symbol;Acc:MGI:1927345]	Xrcc2	6.93837	6.91187	4.94688	7.92448	7.94936	9.89828
ENSMUSG00000056671	-0.447875	3.23391	8.39083	0.292586	PRELI domain containing 2 [Source:MGI Symbol;Acc:MGI:1924869]	Prelid2	5.94718	6.91187	5.93626	9.90561	6.95569	8.90845
ENSMUSG00000044469	-0.447875	3.23391	4.3293	0.292586	tumor necrosis factor, alpha-induced protein 8-like 1 [Source:MGI Symbol;Acc:MGI:1913693]	Tnfaip8l1	6.93837	6.91187	4.94688	7.92448	6.95569	10.8881
ENSMUSG00000020455	0.407057	6.07344	12.8351	0.0112057	tripartite motif-containing 11 [Source:MGI Symbol;Acc:MGI:2137355]	Trim11	84.2517	68.1313	71.2351	49.528	60.6139	58.3998
ENSMUSG00000039841	-0.446051	3.89288	9.51166	0.170547	zinc finger protein 800 [Source:MGI Symbol;Acc:MGI:1889334]	Zfp800	9.91196	9.8741	12.8619	15.849	15.8987	12.8678
ENSMUSG00000025348	0.406776	5.9972	39.9547	0.00649407	integrin alpha 7 [Source:MGI Symbol;Acc:MGI:102700]	Itga7	70.3749	67.1439	74.2032	53.4903	55.6455	50.4812
ENSMUSG00000057411	0.406476	5.16257	7.83798	0.0439847	family with sequence similarity 173, member A [Source:MGI Symbol;Acc:MGI:2384888]	Fam173a	44.6038	37.5216	33.6388	24.764	29.8101	32.6643
ENSMUSG00000059834	-0.443904	3.40102	6.75112	0.263155	sodium channel and clathrin linker 1 [Source:MGI Symbol;Acc:MGI:1914411]	Sclt1	5.94718	7.89928	7.91501	11.8867	8.94303	8.90845
ENSMUSG00000003344	0.405247	5.64418	17.6955	0.0168458	BTB (POZ) domain containing 2 [Source:MGI Symbol;Acc:MGI:1933831]	Btbd2	58.4806	56.2823	49.4688	38.6319	39.7468	45.5321
ENSMUSG00000002984	0.402248	6.51995	45.7994	0.00119528	translocase of outer mitochondrial membrane 40 homolog (yeast) [Source:MGI Symbol;Acc:MGI:1858259]	Tomm40	108.04	99.7284	98.9376	73.3015	78.4999	80.176
ENSMUSG00000056310	0.401989	6.48318	8.58231	0.0256757	tRNA-yW synthesizing protein 1 homolog (S. cerevisiae) [Source:MGI Symbol;Acc:MGI:2141161]	Tyw1	112.996	85.9046	99.927	65.377	86.4493	74.2371
ENSMUSG00000099104	-0.440864	3.55077	2.82596	0.237274	predicted gene 17087 [Source:MGI Symbol;Acc:MGI:4937914]	Gm17087	5.94718	9.8741	8.90438	14.8584	8.94303	9.89828
ENSMUSG00000062867	-0.440864	3.55077	16.5987	0.237274	inosine 5'-phosphate dehydrogenase 2 [Source:MGI Symbol;Acc:MGI:109367]	Impdh2	7.92957	8.88669	7.91501	11.8867	9.9367	11.8779
ENSMUSG00000028452	0.399999	8.24259	6.30047	0.0451001	valosin containing protein [Source:MGI Symbol;Acc:MGI:99919]	Vcp	410.355	306.097	310.664	212.971	285.183	280.121
ENSMUSG00000038126	-0.440136	4.19545	2.74522	0.147607	M-phase phosphoprotein 9 [Source:MGI Symbol;Acc:MGI:2443138]	Mphosph9	14.8679	9.8741	16.8194	16.8395	24.8417	14.8474
ENSMUSG00000029587	-0.440136	4.19544	6.92798	0.128356	zinc finger protein 12 [Source:MGI Symbol;Acc:MGI:99157]	Zfp12	11.8944	12.8363	16.8194	20.8018	19.8734	15.8372
ENSMUSG00000022792	0.399315	5.91276	46.9247	0.00951299	tyrosyl-tRNA synthetase 2 (mitochondrial) [Source:MGI Symbol;Acc:MGI:1917370]	Yars2	67.4014	68.1313	63.3201	49.528	48.6898	52.4609
ENSMUSG00000027351	-0.438682	4.28367	22.1174	0.116989	sprouty protein with EVH-1 domain 1, related sequence [Source:MGI Symbol;Acc:MGI:2150016]	Spred1	15.8591	14.8111	13.8513	18.8207	19.8734	21.7762
ENSMUSG00000027900	-0.438462	3.68642	1.51448	0.263609	DNA-damage regulated autophagy modulator 2 [Source:MGI Symbol;Acc:MGI:1914421]	Dram2	5.94718	12.8363	8.90438	17.8301	8.94303	10.8881
ENSMUSG00000044807	-0.438462	3.68643	8.01168	0.214392	zinc finger protein 354C [Source:MGI Symbol;Acc:MGI:1353621]	Zfp354c	9.91196	9.8741	7.91501	11.8867	10.9304	14.8474
ENSMUSG00000074656	0.399235	6.83147	22.351	0.00305917	eukaryotic translation initiation factor 2, subunit 2 (beta) [Source:MGI Symbol;Acc:MGI:1914454]	Eif2s2	131.829	115.527	134.555	93.1127	105.329	91.0641
ENSMUSG00000048478	-0.437585	2.64895	5.38558	0.428811	spermatogenesis associated 33 [Source:MGI Symbol;Acc:MGI:2444920]	Spata33	3.96479	2.96223	3.9575	4.9528	5.96202	3.95931
ENSMUSG00000019732	-0.437585	2.64895	13.0462	0.428811	calreticulin 3 [Source:MGI Symbol;Acc:MGI:1920566]	Calr3	2.97359	3.94964	3.9575	4.9528	4.96835	4.94914
ENSMUSG00000056938	-0.437585	2.64895	5.55464	0.428811	acyl-Coenzyme A binding domain containing 4 [Source:MGI Symbol;Acc:MGI:1914381]	Acbd4	2.97359	3.94964	3.9575	5.94336	3.97468	4.94914
ENSMUSG00000061062	-0.437585	2.64895	5.53703	0.428811	predicted pseudogene 10093 [Source:MGI Symbol;Acc:MGI:3704479]	Gm10093	3.96479	3.94964	2.96813	4.9528	3.97468	5.93897
ENSMUSG00000079502	-0.437585	2.64895	5.53703	0.428811	cilia and flagella associated protein 77 [Source:MGI Symbol;Acc:MGI:2685669]	Cfap77	3.96479	3.94964	2.96813	4.9528	3.97468	5.93897
ENSMUSG00000021226	0.397186	5.41224	32.5274	0.0311441	acyl-CoA thioesterase 2 [Source:MGI Symbol;Acc:MGI:2159605]	Acot2	48.5686	46.4083	43.5325	33.6791	34.7784	36.6236
ENSMUSG00000069874	-0.436517	3.81042	33.2542	0.194072	immunity-related GTPase family M member 2 [Source:MGI Symbol;Acc:MGI:1926262]	Irgm2	9.91196	9.8741	10.8831	13.8678	13.9114	13.8576
ENSMUSG00000025351	0.396408	5.86453	50.3511	0.0113932	CD63 antigen [Source:MGI Symbol;Acc:MGI:99529]	Cd63	61.4542	65.169	65.2988	50.5186	47.6961	47.5117
ENSMUSG00000025915	-0.434378	4.59086	5.54436	0.0813716	serum/glucocorticoid regulated kinase 3 [Source:MGI Symbol;Acc:MGI:2182368]	Sgk3	20.8151	14.8111	20.7769	22.7829	30.8038	22.766
ENSMUSG00000043439	-0.433517	2.89288	3.32781	0.379982	RIKEN cDNA E130012A19 gene [Source:MGI Symbol;Acc:MGI:2143991]	E130012A19Rik	3.96479	3.94964	5.93626	5.94336	7.94936	4.94914
ENSMUSG00000050150	-0.433517	2.89288	1.68003	0.379982	solute carrier family 9, subfamily B (NHA1, cation proton antiporter 1), member 1 [Source:MGI Symbol;Acc:MGI:1921696]	Slc9b1	4.95598	2.96223	5.93626	4.9528	8.94303	4.94914
ENSMUSG00000040204	-0.433517	2.89288	4.19381	0.379982	RIKEN cDNA 2810417H13 gene [Source:MGI Symbol;Acc:MGI:1915276]	2810417H13Rik	3.96479	3.94964	5.93626	6.93392	6.95569	4.94914
ENSMUSG00000070570	-0.433517	2.89288	4.19381	0.379982	solute carrier family 17 (sodium-dependent inorganic phosphate cotransporter), member 7 [Source:MGI Symbol;Acc:MGI:1920211]	Slc17a7	3.96479	3.94964	5.93626	6.93392	6.95569	4.94914
ENSMUSG00000071267	-0.433517	2.89287	4.28304	0.379982	zinc finger protein 942 [Source:MGI Symbol;Acc:MGI:1920483]	Zfp942	3.96479	5.92446	3.9575	6.93392	4.96835	6.92879
ENSMUSG00000025323	-0.432407	4.12894	2.36648	0.173883	trans-acting transcription factor 4 [Source:MGI Symbol;Acc:MGI:107595]	Sp4	9.91196	16.786	12.8619	23.7735	12.9177	16.8271
ENSMUSG00000030177	-0.432407	4.12895	6.87438	0.145234	coiled-coil domain containing 77 [Source:MGI Symbol;Acc:MGI:1914450]	Ccdc77	15.8591	11.8489	11.8725	14.8584	18.8797	19.7966
ENSMUSG00000032998	-0.431682	5.88081	5.41234	0.0580553	forkhead box J3 [Source:MGI Symbol;Acc:MGI:2443432]	Foxj3	38.6567	52.3327	54.4157	80.2354	59.6202	56.4202
ENSMUSG00000014075	-0.431415	4.22121	27.6052	0.132176	Tctex1 domain containing 2 [Source:MGI Symbol;Acc:MGI:1913311]	Tctex1d2	14.8679	13.8237	13.8513	17.8301	19.8734	19.7966
ENSMUSG00000054871	-0.431415	4.22121	12.5109	0.132176	transmembrane protein 158 [Source:MGI Symbol;Acc:MGI:1919559]	Tmem158	15.8591	12.8363	13.8513	16.8395	20.8671	19.7966
ENSMUSG00000040102	0.393785	5.64895	10.0685	0.0199618	kelch-like 42 [Source:MGI Symbol;Acc:MGI:2444786]	Klhl42	61.4542	48.3831	54.4157	36.6507	46.7025	41.5728
ENSMUSG00000003039	-0.430997	4.90087	9.43257	0.0523945	family with sequence similarity 32, member A [Source:MGI Symbol;Acc:MGI:1915172]	Fam32a	20.8151	27.6475	22.7556	35.6602	27.8228	32.6643
ENSMUSG00000050530	-0.430848	3.10146	15.5319	0.338602	family with sequence similarity 171, member A1 [Source:MGI Symbol;Acc:MGI:2442917]	Fam171a1	4.95598	5.92446	5.93626	7.92448	7.94936	6.92879
ENSMUSG00000028389	-0.430848	3.10147	8.96445	0.338602	zinc finger protein 37 [Source:MGI Symbol;Acc:MGI:99181]	Zfp37	5.94718	4.93705	5.93626	6.93392	8.94303	6.92879
ENSMUSG00000056832	-0.43055	4.30791	17.7365	0.120413	tetratricopeptide repeat domain 26 [Source:MGI Symbol;Acc:MGI:2444853]	Ttc26	14.8679	16.786	13.8513	20.8018	18.8797	21.7762
ENSMUSG00000039263	0.393483	6.3079	51.8143	0.00327196	aminopeptidase-like 1 [Source:MGI Symbol;Acc:MGI:2448523]	Npepl1	91.1901	87.8795	84.097	64.3864	66.5759	69.2879
ENSMUSG00000029389	0.392867	5.58091	23.6169	0.0234733	DEAD (Asp-Glu-Ala-Asp) box polypeptide 55 [Source:MGI Symbol;Acc:MGI:1915098]	Ddx55	50.551	56.2823	49.4688	40.613	36.7658	41.5728
ENSMUSG00000037526	-0.429116	4.46712	10.0749	0.100198	autophagy related 14 [Source:MGI Symbol;Acc:MGI:1261775]	Atg14	16.8503	14.8111	19.7875	22.7829	25.8354	20.7864
ENSMUSG00000051238	-0.428961	3.28367	12.7236	0.303032	SWIM type zinc finger 7 associated protein 1 [Source:MGI Symbol;Acc:MGI:1914212]	Swsap1	6.93837	5.92446	6.92563	8.91505	9.9367	7.91862
ENSMUSG00000049184	-0.428961	3.28367	12.7606	0.303032	purine-rich element binding protein G [Source:MGI Symbol;Acc:MGI:1922279]	Purg	6.93837	5.92446	6.92563	7.92448	9.9367	8.90845
ENSMUSG00000042202	-0.428961	3.28367	2.77697	0.303032	solute carrier family 35, member E2 [Source:MGI Symbol;Acc:MGI:2444240]	Slc35e2	8.92077	5.92446	4.94688	6.93392	8.94303	10.8881
ENSMUSG00000047466	0.390723	5.43444	21.4726	0.0325536	RIKEN cDNA 8030462N17 gene [Source:MGI Symbol;Acc:MGI:2444951]	8030462N17Rik	44.6038	45.4208	50.4582	37.6413	36.7658	32.6643
ENSMUSG00000026393	-0.428415	5.20192	5.71356	0.0531569	NIMA (never in mitosis gene a)-related expressed kinase 7 [Source:MGI Symbol;Acc:MGI:1890645]	Nek7	23.7887	32.5845	32.6494	48.5375	35.7721	35.6338
ENSMUSG00000042684	-0.427558	3.44541	3.46431	0.272131	N-acetylneuraminate pyruvate lyase [Source:MGI Symbol;Acc:MGI:1921341]	Npl	5.94718	9.8741	6.92563	11.8867	7.94936	10.8881
ENSMUSG00000055900	-0.42749	4.67715	6.36461	0.0764788	transmembrane protein 69 [Source:MGI Symbol;Acc:MGI:3045357]	Tmem69	16.8503	23.6978	19.7875	31.6979	22.8544	26.7253
ENSMUSG00000038022	-0.426472	3.59085	5.61978	0.245069	family with sequence similarity 188, member B [Source:MGI Symbol;Acc:MGI:3583959]	Fam188b	6.93837	9.8741	8.90438	13.8678	9.9367	10.8881
ENSMUSG00000040433	-0.42594	4.91673	4.39823	0.0798403	zinc finger and BTB domain containing 38 [Source:MGI Symbol;Acc:MGI:2442866]	Zbtb38	18.8327	24.6852	28.6919	39.6224	30.8038	26.7253
ENSMUSG00000032175	0.389461	5.35522	14.849	0.0384005	tyrosine kinase 2 [Source:MGI Symbol;Acc:MGI:1929470]	Tyk2	48.5686	40.4838	43.5325	30.7074	36.7658	33.6541
ENSMUSG00000021552	-0.424904	3.84396	1.82085	0.22495	G kinase anchoring protein 1 [Source:MGI Symbol;Acc:MGI:1891694]	Gkap1	6.93837	12.8363	11.8725	19.8112	10.9304	11.8779
ENSMUSG00000059474	-0.423824	4.05923	10.6972	0.1645	mbt domain containing 1 [Source:MGI Symbol;Acc:MGI:2143977]	Mbtd1	10.9032	13.8237	12.8619	18.8207	14.905	16.8271
ENSMUSG00000064289	-0.423824	4.05923	14.2492	0.1645	TRAF family member-associated Nf-kappa B activator [Source:MGI Symbol;Acc:MGI:107676]	Tank	11.8944	13.8237	11.8725	17.8301	14.905	17.8169
ENSMUSG00000049288	0.388234	6.08752	10.3347	0.0177379	Lix1-like [Source:MGI Symbol;Acc:MGI:3036267]	Lix1l	83.2605	66.1564	75.1926	50.5186	64.5885	56.4202
ENSMUSG00000058254	-0.423402	4.15591	4.98996	0.149466	tetraspanin 7 [Source:MGI Symbol;Acc:MGI:1298407]	Tspan7	13.8767	15.7986	10.8831	17.8301	14.905	21.7762
ENSMUSG00000003348	-0.423037	4.24652	18.1967	0.135966	MOB kinase activator 3A [Source:MGI Symbol;Acc:MGI:3050117]	Mob3a	15.8591	13.8237	13.8513	17.8301	20.8671	19.7966
ENSMUSG00000021712	-0.422186	4.4885	11.5996	0.102959	tripartite motif-containing 23 [Source:MGI Symbol;Acc:MGI:1933161]	Trim23	19.8239	15.7986	16.8194	20.8018	25.8354	23.7559
ENSMUSG00000039765	-0.421963	4.5609	17.9231	0.0940028	coiled-coil and C2 domain containing 2A [Source:MGI Symbol;Acc:MGI:1924487]	Cc2d2a	18.8327	16.786	19.7875	24.764	26.8291	22.766
ENSMUSG00000017307	0.38804	5.27138	25.2955	0.0453554	acyl-CoA thioesterase 8 [Source:MGI Symbol;Acc:MGI:2158201]	Acot8	43.6126	42.4586	38.5857	30.7074	30.8038	33.6541
ENSMUSG00000028243	-0.421581	4.69564	15.4777	0.0785239	UBX domain protein 2B [Source:MGI Symbol;Acc:MGI:1915303]	Ubxn2b	19.8239	22.7104	18.7981	27.7357	24.8417	29.6948
ENSMUSG00000034781	0.387692	6.28365	53.1508	0.00406239	guanine nucleotide binding protein, alpha 11 [Source:MGI Symbol;Acc:MGI:95766]	Gna11	89.2077	85.9046	83.1076	63.3959	65.5822	68.2981
ENSMUSG00000056536	0.387261	5.22756	10.3436	0.0493178	phosphatidylinositol glycan anchor biosynthesis, class N [Source:MGI Symbol;Acc:MGI:1351629]	Pign	37.6655	37.5216	45.5113	32.6885	32.7911	26.7253
ENSMUSG00000032009	-0.421129	4.87677	7.85985	0.0602199	sestrin 3 [Source:MGI Symbol;Acc:MGI:1922997]	Sesn3	27.7535	20.7356	21.7663	26.7451	34.7784	32.6643
ENSMUSG00000036875	0.385204	5.49377	26.2619	0.0313013	DNA replication helicase/nuclease 2 [Source:MGI Symbol;Acc:MGI:2443732]	Dna2	50.551	45.4208	50.4582	35.6602	39.7468	36.6236
ENSMUSG00000074364	0.385106	6.80403	11.9235	0.0131425	EH-domain containing 2 [Source:MGI Symbol;Acc:MGI:2154274]	Ehd2	135.794	109.602	127.629	86.1788	107.316	92.054
ENSMUSG00000039474	0.384549	6.70707	77.9228	0.000932204	Wolfram syndrome 1 homolog (human) [Source:MGI Symbol;Acc:MGI:1328355]	Wfs1	117.952	112.565	117.736	88.1599	91.4176	87.1048
ENSMUSG00000039753	0.380554	5.42892	18.6906	0.0376852	F-box and leucine-rich repeat protein 5 [Source:MGI Symbol;Acc:MGI:2152883]	Fbxl5	43.6126	45.4208	50.4582	37.6413	36.7658	32.6643
ENSMUSG00000029710	0.37816	6.34059	39.8067	0.00423139	Eph receptor B4 [Source:MGI Symbol;Acc:MGI:104757]	Ephb4	90.1989	84.9172	93.0013	67.3581	72.5379	66.3184
ENSMUSG00000039041	0.373164	5.82308	38.1709	0.0188611	adhesion regulating molecule 1 [Source:MGI Symbol;Acc:MGI:1929289]	Adrm1	64.4278	61.2194	59.3626	45.5658	47.6961	49.4914
ENSMUSG00000041238	-0.416248	5.00095	20.6041	0.051857	retinoblastoma binding protein 8 [Source:MGI Symbol;Acc:MGI:2442995]	Rbbp8	25.7711	23.6978	27.7025	34.6696	36.7658	31.6745
ENSMUSG00000029624	0.372535	5.49905	29.3386	0.036891	pentatricopeptide repeat domain 1 [Source:MGI Symbol;Acc:MGI:1919049]	Ptcd1	48.5686	46.4083	51.4476	38.6319	38.7531	35.6338
ENSMUSG00000026767	-0.41548	4.50955	2.40354	0.171034	family with sequence similarity 188, member A [Source:MGI Symbol;Acc:MGI:1914210]	Fam188a	12.8856	18.7608	21.7663	31.6979	20.8671	18.8067
ENSMUSG00000026754	-0.415169	4.35522	38.8337	0.127197	golgi autoantigen, golgin subfamily a, 1 [Source:MGI Symbol;Acc:MGI:1924149]	Golga1	15.8591	15.7986	15.83	20.8018	21.8607	20.7864
ENSMUSG00000001120	-0.414524	4.08753	15.9312	0.169181	poly(rC) binding protein 3 [Source:MGI Symbol;Acc:MGI:1890470]	Pcbp3	12.8856	11.8489	13.8513	16.8395	18.8797	15.8372
ENSMUSG00000025815	-0.414524	4.08752	16.663	0.169181	dehydrogenase E1 and transketolase domain containing 1 [Source:MGI Symbol;Acc:MGI:2445096]	Dhtkd1	11.8944	13.8237	12.8619	18.8207	15.8987	16.8271
ENSMUSG00000029196	-0.414524	4.08753	16.3192	0.169181	transcriptional adaptor 2B [Source:MGI Symbol;Acc:MGI:3035274]	Tada2b	13.8767	12.8363	11.8725	15.849	16.8924	18.8067
ENSMUSG00000034518	-0.414238	3.98599	18.9769	0.186533	HMG box domain containing 4 [Source:MGI Symbol;Acc:MGI:1918073]	Hmgxb4	10.9032	11.8489	12.8619	16.8395	15.8987	14.8474
ENSMUSG00000027610	0.37208	5.69104	6.52184	0.0424885	glutathione synthetase [Source:MGI Symbol;Acc:MGI:95852]	Gss	65.419	53.3201	49.4688	36.6507	44.7151	48.5016
ENSMUSG00000063317	-0.4139	3.87676	5.00849	0.20599	ubiquitin specific peptidase 31 [Source:MGI Symbol;Acc:MGI:1923429]	Usp31	11.8944	8.88669	11.8725	12.8773	17.8861	12.8678
ENSMUSG00000024052	-0.4139	3.87675	2.1021	0.20599	lipin 2 [Source:MGI Symbol;Acc:MGI:1891341]	Lpin2	8.92077	14.8111	8.90438	16.8395	9.9367	16.8271
ENSMUSG00000040123	-0.413496	3.75858	5.33434	0.227889	zinc finger, MYM-type 5 [Source:MGI Symbol;Acc:MGI:3041170]	Zmym5	10.9032	7.89928	10.8831	11.8867	15.8987	11.8779
ENSMUSG00000071252	-0.413496	3.75858	11.3878	0.227889	RIKEN cDNA 2210408I21 gene [Source:MGI Symbol;Acc:MGI:1919621]	2210408I21Rik	8.92077	9.8741	10.8831	14.8584	12.9177	11.8779
ENSMUSG00000031969	0.370031	6.30189	12.9961	0.0109039	acyl-Coenzyme A dehydrogenase family, member 8 [Source:MGI Symbol;Acc:MGI:1914198]	Acad8	96.146	78.9928	85.0863	60.4242	73.5316	67.3083
ENSMUSG00000035478	0.369063	6.32879	19.8395	0.00542768	methyl-CpG binding domain protein 3 [Source:MGI Symbol;Acc:MGI:1333812]	Mbd3	96.146	83.9298	85.0863	62.4053	71.5442	71.2676
ENSMUSG00000022323	-0.413003	3.62984	7.20768	0.25265	reactive intermediate imine deaminase A homolog [Source:MGI Symbol;Acc:MGI:1095401]	Rida	7.92957	8.88669	9.89376	13.8678	11.924	9.89828
ENSMUSG00000032261	-0.413003	3.62984	13.1901	0.25265	SH3 domain binding glutamic acid-rich protein like 2 [Source:MGI Symbol;Acc:MGI:1915350]	Sh3bgrl2	7.92957	8.88669	9.89376	12.8773	11.924	10.8881
ENSMUSG00000026771	-0.413003	3.62984	13.4496	0.25265	speckle-type POZ protein-like [Source:MGI Symbol;Acc:MGI:1924107]	Spopl	7.92957	9.8741	8.90438	12.8773	10.9304	11.8779
ENSMUSG00000040612	0.367303	5.43444	24.1705	0.0443788	immunoglobulin-like domain containing receptor 2 [Source:MGI Symbol;Acc:MGI:1196370]	Ildr2	45.595	44.4334	49.4688	36.6507	37.7595	33.6541
ENSMUSG00000032232	0.366392	6.05923	10.6045	0.016821	cingulin-like 1 [Source:MGI Symbol;Acc:MGI:1915428]	Cgnl1	81.2781	65.169	72.2244	50.5186	62.6012	56.4202
ENSMUSG00000040822	-0.412388	3.48849	27.4705	0.280804	RIKEN cDNA 1700123O20 gene [Source:MGI Symbol;Acc:MGI:1920893]	1700123O20Rik	7.92957	7.89928	7.91501	10.8962	9.9367	10.8881
ENSMUSG00000038957	-0.411714	5.01573	4.72861	0.0716806	enhancer of mRNA decapping 3 [Source:MGI Symbol;Acc:MGI:2142951]	Edc3	27.7535	29.6223	20.7769	31.6979	29.8101	42.5626
ENSMUSG00000027957	-0.411601	3.33176	2.87328	0.313043	solute carrier family 35 (UDP-N-acetylglucosamine (UDP-GlcNAc) transporter), member 3 [Source:MGI Symbol;Acc:MGI:1917648]	Slc35a3	4.95598	7.89928	7.91501	11.8867	7.94936	7.91862
ENSMUSG00000054034	-0.411601	3.33176	24.3692	0.313043	transcription elongation factor A (SII)-like 5 [Source:MGI Symbol;Acc:MGI:3036236]	Tceal5	6.93837	6.91187	6.92563	8.91505	9.9367	8.90845
ENSMUSG00000008683	-0.410786	5.57597	3.24573	0.120673	ribosomal protein S15A [Source:MGI Symbol;Acc:MGI:2389091]	Rps15a	50.551	35.5467	31.66	39.6224	55.6455	61.3693
ENSMUSG00000032415	-0.410555	3.15591	7.30914	0.350293	ubiquitin-conjugating enzyme E2C binding protein [Source:MGI Symbol;Acc:MGI:1917598]	Ube2cbp	4.95598	6.91187	5.93626	8.91505	6.95569	7.91862
ENSMUSG00000039850	-0.410555	3.15591	7.28726	0.350293	endonuclease V [Source:MGI Symbol;Acc:MGI:2444688]	Endov	5.94718	6.91187	4.94688	7.92448	6.95569	8.90845
ENSMUSG00000022236	-0.410555	3.15591	2.78312	0.350293	ropporin 1-like [Source:MGI Symbol;Acc:MGI:2182357]	Ropn1l	7.92957	4.93705	4.94688	5.94336	8.94303	8.90845
ENSMUSG00000026198	0.36602	5.39537	6.6861	0.0482172	ATP-binding cassette, sub-family B (MDR/TAP), member 6 [Source:MGI Symbol;Acc:MGI:1921354]	Abcb6	52.5334	42.4586	40.5644	29.7168	36.7658	38.6033
ENSMUSG00000037400	-0.410248	4.73195	6.81198	0.0826144	ATPase, class VI, type 11B [Source:MGI Symbol;Acc:MGI:1923545]	Atp11b	17.8415	20.7356	24.7344	31.6979	28.8164	23.7559
ENSMUSG00000040021	-0.410248	4.73194	7.5239	0.0826144	large tumor suppressor [Source:MGI Symbol;Acc:MGI:1333883]	Lats1	18.8327	24.6852	19.7875	31.6979	23.8481	28.705
ENSMUSG00000023963	-0.409869	4.6678	3.51648	0.108878	cytochrome P450, family 39, subfamily a, polypeptide 1 [Source:MGI Symbol;Acc:MGI:1927096]	Cyp39a1	15.8591	24.6852	19.7875	32.6885	20.8671	26.7253
ENSMUSG00000028414	-0.40945	4.6007	11.5974	0.0989762	fukutin [Source:MGI Symbol;Acc:MGI:2179507]	Fktn	16.8503	20.7356	19.7875	28.7263	23.8481	23.7559
ENSMUSG00000026495	-0.4091	2.95561	3.52076	0.393859	EF-hand calcium binding domain 2 [Source:MGI Symbol;Acc:MGI:1915476]	Efcab2	3.96479	4.93705	5.93626	7.92448	6.95569	4.94914
ENSMUSG00000025227	-0.4091	2.95561	4.84981	0.393859	major facilitator superfamily domain containing 13a [Source:MGI Symbol;Acc:MGI:1922396]	Mfsd13a	3.96479	5.92446	4.94688	7.92448	5.96202	5.93897
ENSMUSG00000002250	-0.408986	4.53032	16.3966	0.108455	peroxisome proliferator activator receptor delta [Source:MGI Symbol;Acc:MGI:101884]	Ppard	18.8327	16.786	18.7981	22.7829	26.8291	22.766
ENSMUSG00000029676	-0.407889	4.37831	6.10869	0.130556	protection of telomeres 1A [Source:MGI Symbol;Acc:MGI:2141503]	Pot1a	15.8591	13.8237	18.7981	21.7923	24.8417	17.8169
ENSMUSG00000024892	0.36538	7.67712	20.2683	0.00389084	pyruvate carboxylase [Source:MGI Symbol;Acc:MGI:97520]	Pcx	247.799	225.129	211.726	162.452	178.861	190.047
ENSMUSG00000040236	0.365277	5.56593	13.1552	0.0360366	trafficking protein particle complex 5 [Source:MGI Symbol;Acc:MGI:1913932]	Trappc5	56.4982	47.3957	49.4688	35.6602	42.7278	40.5829
ENSMUSG00000042558	0.364438	5.78903	6.76593	0.0398391	ADP-ribosylhydrolase like 2 [Source:MGI Symbol;Acc:MGI:2140364]	Adprhl2	69.3837	57.2698	53.4263	39.6224	47.6961	52.4609
ENSMUSG00000030092	-0.406938	2.72295	2.37499	0.445687	contactin 6 [Source:MGI Symbol;Acc:MGI:1858223]	Cntn6	4.95598	2.96223	3.9575	3.96224	6.95569	4.94914
ENSMUSG00000020878	-0.406938	2.72295	3.07999	0.445687	leucine rich repeat containing 46 [Source:MGI Symbol;Acc:MGI:1916547]	Lrrc46	3.96479	2.96223	4.94688	5.94336	5.96202	3.95931
ENSMUSG00000024424	-0.406938	2.72295	3.07999	0.445687	tetratricopeptide repeat domain 39C [Source:MGI Symbol;Acc:MGI:1919997]	Ttc39c	3.96479	2.96223	4.94688	5.94336	5.96202	3.95931
ENSMUSG00000069920	-0.406938	2.72295	4.83528	0.445687	UDP-GlcNAc:betaGal beta-1,3-N-acetylglucosaminyltransferase 9 [Source:MGI Symbol;Acc:MGI:2142841]	B3gnt9	3.96479	4.93705	2.96813	4.9528	4.96835	5.93897
ENSMUSG00000030672	-0.406938	2.72295	4.71134	0.445687	myosin light chain, phosphorylatable, fast skeletal muscle [Source:MGI Symbol;Acc:MGI:97273]	Mylpf	4.95598	2.96223	3.9575	4.9528	5.96202	4.94914
ENSMUSG00000075028	-0.406938	2.72295	15.1325	0.445687	PR domain containing 11 [Source:MGI Symbol;Acc:MGI:2685553]	Prdm11	3.96479	3.94964	3.9575	4.9528	4.96835	5.93897
ENSMUSG00000035126	-0.406938	2.72295	2.42907	0.445687	WD repeat domain 78 [Source:MGI Symbol;Acc:MGI:2385328]	Wdr78	3.96479	4.93705	2.96813	4.9528	3.97468	6.92879
ENSMUSG00000069378	0.361427	5.4563	16.5663	0.0461239	PR domain containing 6 [Source:MGI Symbol;Acc:MGI:2684938]	Prdm6	45.595	44.4334	51.4476	37.6413	38.7531	33.6541
ENSMUSG00000041231	-0.405628	4.11527	12.778	0.173801	ubiquitin-like domain containing CTD phosphatase 1 [Source:MGI Symbol;Acc:MGI:1933105]	Ublcp1	12.8856	14.8111	11.8725	17.8301	15.8987	18.8067
ENSMUSG00000049969	-0.405628	4.11527	5.729	0.173801	pleckstrin homology domain containing, family F (with FYVE domain) member 2 [Source:MGI Symbol;Acc:MGI:1919051]	Plekhf2	13.8767	14.8111	10.8831	16.8395	14.905	20.7864
ENSMUSG00000024339	0.361091	7.08752	6.71815	0.0403399	transporter 2, ATP-binding cassette, sub-family B (MDR/TAP) [Source:MGI Symbol;Acc:MGI:98484]	Tap2	176.433	138.237	137.523	99.0561	126.196	126.698
ENSMUSG00000029440	0.361003	6.65132	9.66819	0.0203082	proteasome (prosome, macropain) 26S subunit, non-ATPase, 9 [Source:MGI Symbol;Acc:MGI:1914401]	Psmd9	125.882	101.703	104.874	75.2826	93.405	90.0743
ENSMUSG00000042737	0.359893	5.87268	52.3561	0.0211145	dolichyl-phosphate mannosyltransferase polypeptide 3 [Source:MGI Symbol;Acc:MGI:1915813]	Dpm3	62.4454	63.1942	65.2988	50.5186	49.6835	48.5016
ENSMUSG00000052423	-0.404631	4.01573	8.92844	0.191698	UDP-Gal:betaGlcNAc beta 1,4-galactosyltransferase, polypeptide 3 [Source:MGI Symbol;Acc:MGI:1928767]	B4galt3	11.8944	13.8237	10.8831	16.8395	13.9114	17.8169
ENSMUSG00000045854	-0.40346	3.90882	3.70572	0.211781	LYR motif containing 2 [Source:MGI Symbol;Acc:MGI:1917573]	Lyrm2	8.92077	10.8615	13.8513	17.8301	14.905	11.8779
ENSMUSG00000039568	-0.40346	3.90882	4.9202	0.211781	UBA-like domain containing 1 [Source:MGI Symbol;Acc:MGI:1916255]	Ubald1	11.8944	12.8363	8.90438	13.8678	12.9177	17.8169
ENSMUSG00000026468	-0.403384	2.44542	28.486	0.508964	LIM homeobox protein 4 [Source:MGI Symbol;Acc:MGI:101776]	Lhx4	2.97359	2.96223	2.96813	3.96224	3.97468	3.95931
ENSMUSG00000032262	-0.403384	2.44542	28.486	0.508964	elongation of very long chain fatty acids (FEN1/Elo2, SUR4/Elo3, yeast)-like 4 [Source:MGI Symbol;Acc:MGI:1933331]	Elovl4	2.97359	2.96223	2.96813	3.96224	3.97468	3.95931
ENSMUSG00000039942	-0.403384	2.44542	28.486	0.508964	prostaglandin E receptor 4 (subtype EP4) [Source:MGI Symbol;Acc:MGI:104311]	Ptger4	2.97359	2.96223	2.96813	3.96224	3.97468	3.95931
ENSMUSG00000044139	-0.403384	2.44542	28.486	0.508964	protease, serine 53 [Source:MGI Symbol;Acc:MGI:2652890]	Prss53	2.97359	2.96223	2.96813	3.96224	3.97468	3.95931
ENSMUSG00000051736	-0.403384	2.44542	28.486	0.508964	family with sequence similarity 229, member B [Source:MGI Symbol;Acc:MGI:1913587]	Fam229b	2.97359	2.96223	2.96813	3.96224	3.97468	3.95931
ENSMUSG00000059456	-0.403384	2.44542	28.486	0.508964	PTK2 protein tyrosine kinase 2 beta [Source:MGI Symbol;Acc:MGI:104908]	Ptk2b	2.97359	2.96223	2.96813	3.96224	3.97468	3.95931
ENSMUSG00000064125	-0.403384	2.44542	28.486	0.508964	proline rich 36 [Source:MGI Symbol;Acc:MGI:3605626]	Prr36	2.97359	2.96223	2.96813	3.96224	3.97468	3.95931
ENSMUSG00000067297	-0.403384	2.44542	28.486	0.508964	interferon induced protein with tetratricopeptide repeats 1B like 2 [Source:MGI Symbol;Acc:MGI:2148249]	Ifit1bl2	2.97359	2.96223	2.96813	3.96224	3.97468	3.95931
ENSMUSG00000026820	0.358621	5.55075	22.8513	0.0406175	prostaglandin E synthase 2 [Source:MGI Symbol;Acc:MGI:1917592]	Ptges2	50.551	53.3201	47.49	39.6224	36.7658	41.5728
ENSMUSG00000028926	-0.402359	4.99348	4.63582	0.0738534	cyclin-dependent kinase 14 [Source:MGI Symbol;Acc:MGI:894318]	Cdk14	20.8151	29.6223	26.7132	41.6035	28.8164	31.6745
ENSMUSG00000024885	-0.402063	3.79335	4.18169	0.234408	aldehyde dehydrogenase 3 family, member B1 [Source:MGI Symbol;Acc:MGI:1914939]	Aldh3b1	12.8856	8.88669	8.90438	10.8962	14.905	14.8474
ENSMUSG00000031765	0.355474	8.0203	32.6371	0.00115971	metallothionein 1 [Source:MGI Symbol;Acc:MGI:97171]	Mt1	308.262	275.487	283.951	211.98	236.493	229.64
ENSMUSG00000047694	-0.400863	4.40102	3.29211	0.133892	Yip1 domain family, member 6 [Source:MGI Symbol;Acc:MGI:1925179]	Yipf6	12.8856	20.7356	15.83	25.7546	16.8924	22.766
ENSMUSG00000025645	-0.400863	4.40103	2.53566	0.161396	coiled-coil domain containing 51 [Source:MGI Symbol;Acc:MGI:1913908]	Ccdc51	21.8063	13.8237	13.8513	15.849	24.8417	24.7457
ENSMUSG00000046756	0.35515	6.04487	12.6426	0.0155272	mitchondrial ribosomal protein S7 [Source:MGI Symbol;Acc:MGI:1354367]	Mrps7	67.4014	68.1313	80.1395	59.4336	58.6265	50.4812
ENSMUSG00000014771	0.352956	5.48849	8.70533	0.0487684	programmed cell death 2 [Source:MGI Symbol;Acc:MGI:104643]	Pdcd2	49.5598	42.4586	52.4369	36.6507	42.7278	33.6541
ENSMUSG00000054484	-0.400369	3.66781	5.37103	0.260023	transmembrane protein 62 [Source:MGI Symbol;Acc:MGI:2139461]	Tmem62	7.92957	8.88669	10.8831	13.8678	12.9177	9.89828
ENSMUSG00000055334	-0.400369	3.66781	5.48941	0.260023	snurportin 1 [Source:MGI Symbol;Acc:MGI:1913319]	Snupn	7.92957	10.8615	8.90438	13.8678	9.9367	12.8678
ENSMUSG00000036983	-0.399771	4.31989	8.83801	0.147148	transcription factor B1, mitochondrial [Source:MGI Symbol;Acc:MGI:2146851]	Tfb1m	13.8767	17.7734	14.8406	22.7829	17.8861	20.7864
ENSMUSG00000045822	-0.399771	4.31989	12.4141	0.147148	zinc finger SWIM-type containing 3 [Source:MGI Symbol;Acc:MGI:1914788]	Zswim3	16.8503	15.7986	13.8513	18.8207	19.8734	22.766
ENSMUSG00000021965	-0.399374	5.10839	49.1951	0.0522547	spindle and kinetochore associated complex subunit 3 [Source:MGI Symbol;Acc:MGI:3041235]	Ska3	27.7535	28.6349	27.7025	36.6507	36.7658	37.6134
ENSMUSG00000028737	0.35245	6.39253	11.9214	0.0131476	aldehyde dehydrogenase 4 family, member A1 [Source:MGI Symbol;Acc:MGI:2443883]	Aldh4a1	102.093	89.8543	84.097	64.3864	73.5316	78.1964
ENSMUSG00000022177	0.35075	5.7717	12.1961	0.0301527	HAUS augmin-like complex, subunit 4 [Source:MGI Symbol;Acc:MGI:1261794]	Haus4	65.419	57.2698	54.4157	41.6035	47.6961	49.4914
ENSMUSG00000035954	-0.398636	4.70481	8.3278	0.0948894	dedicator of cytokinesis 4 [Source:MGI Symbol;Acc:MGI:1918006]	Dock4	21.8063	22.7104	17.8088	25.7546	24.8417	31.6745
ENSMUSG00000018362	-0.398531	4.23392	13.8295	0.161901	karyopherin (importin) alpha 2 [Source:MGI Symbol;Acc:MGI:103561]	Kpna2	12.8856	14.8111	15.83	20.8018	18.8797	17.8169
ENSMUSG00000019850	-0.398272	3.53031	6.3193	0.289189	tumor necrosis factor, alpha-induced protein 3 [Source:MGI Symbol;Acc:MGI:1196377]	Tnfaip3	8.92077	6.91187	8.90438	9.90561	12.9177	9.89828
ENSMUSG00000033697	-0.398272	3.53031	23.7865	0.289189	Rho GTPase activating protein 39 [Source:MGI Symbol;Acc:MGI:107858]	Arhgap39	8.92077	7.89928	7.91501	10.8962	10.9304	10.8881
ENSMUSG00000029095	0.350737	6.09102	6.62906	0.0412964	actin-binding LIM protein 2 [Source:MGI Symbol;Acc:MGI:2385758]	Ablim2	86.2341	69.1187	67.2776	49.528	61.6075	63.349
ENSMUSG00000042354	-0.397389	6.02307	4.95294	0.0667735	guanine nucleotide binding protein-like 3 (nucleolar) [Source:MGI Symbol;Acc:MGI:1353651]	Gnl3	43.6126	61.2194	58.3732	87.1693	62.6012	65.3286
ENSMUSG00000031266	-0.397111	4.14249	2.84678	0.178362	galactosidase, alpha [Source:MGI Symbol;Acc:MGI:1347344]	Gla	9.91196	14.8111	15.83	22.7829	15.8987	14.8474
ENSMUSG00000031749	-0.397111	4.14249	24.7535	0.178362	ST3 beta-galactoside alpha-2,3-sialyltransferase 2 [Source:MGI Symbol;Acc:MGI:99427]	St3gal2	12.8856	13.8237	13.8513	18.8207	16.8924	17.8169
ENSMUSG00000042043	0.350725	6.46712	6.36488	0.0443184	tubulin cofactor A [Source:MGI Symbol;Acc:MGI:107549]	Tbca	110.023	82.9424	97.9482	66.3676	87.4429	74.2371
ENSMUSG00000049421	-0.396597	4.57095	3.76414	0.113908	zinc finger protein 260 [Source:MGI Symbol;Acc:MGI:1347071]	Zfp260	14.8679	18.7608	22.7556	29.7168	24.8417	19.7966
ENSMUSG00000039081	-0.396597	4.57095	5.98515	0.113908	zinc finger protein 503 [Source:MGI Symbol;Acc:MGI:1353644]	Zfp503	18.8327	21.723	15.83	24.764	20.8671	28.705
ENSMUSG00000028776	0.350006	6.65605	16.0536	0.00677073	tubulointerstitial nephritis antigen-like 1 [Source:MGI Symbol;Acc:MGI:2137617]	Tinagl1	113.988	100.716	117.736	84.1977	95.3923	81.1659
ENSMUSG00000026471	-0.395407	4.49906	21.721	0.124956	major histocompatibility complex, class I-related [Source:MGI Symbol;Acc:MGI:1195463]	Mr1	16.8503	17.7734	18.7981	24.764	23.8481	21.7762
ENSMUSG00000041935	-0.395355	5.12212	17.0701	0.0534416	expressed sequence AW549877 [Source:MGI Symbol;Acc:MGI:2146232]	AW549877	25.7711	30.6097	28.6919	40.613	34.7784	36.6236
ENSMUSG00000059401	-0.394534	5.07345	4.52967	0.0764501	mastermind-like domain containing 1 [Source:MGI Symbol;Acc:MGI:3045303]	Mamld1	21.8063	28.6349	31.66	43.5847	33.7848	30.6847
ENSMUSG00000063457	0.347996	8.02031	10.7611	0.0163177	ribosomal protein S15 [Source:MGI Symbol;Acc:MGI:98117]	Rps15	325.112	274.5	266.142	200.093	236.493	243.498
ENSMUSG00000030727	0.347724	5.81888	6.96767	0.0378142	rabaptin, RAB GTPase binding effector protein 2 [Source:MGI Symbol;Acc:MGI:1917564]	Rabep2	69.3837	53.3201	60.3519	41.6035	53.6582	48.5016
ENSMUSG00000021395	-0.39325	4.72296	7.5189	0.0971305	spindlin 1 [Source:MGI Symbol;Acc:MGI:109242]	Spin1	23.7887	17.7734	21.7663	24.764	31.7974	26.7253
ENSMUSG00000026659	-0.392582	4.34354	13.14	0.150811	dual specificity phosphatase 12 [Source:MGI Symbol;Acc:MGI:1890614]	Dusp12	14.8679	17.7734	14.8406	21.7923	18.8797	21.7762
ENSMUSG00000019986	-0.392582	4.34354	5.22489	0.150811	Abelson helper integration site 1 [Source:MGI Symbol;Acc:MGI:87971]	Ahi1	16.8503	17.7734	12.8619	19.8112	17.8861	24.7457
ENSMUSG00000068134	-0.392111	3.20838	2.7487	0.361392	zinc finger protein 120 [Source:MGI Symbol;Acc:MGI:1345179]	Zfp120	6.93837	4.93705	6.92563	6.93392	10.9304	6.92879
ENSMUSG00000032398	-0.392111	3.20838	3.54524	0.361392	small nuclear RNA activating complex, polypeptide 5 [Source:MGI Symbol;Acc:MGI:1914282]	Snapc5	4.95598	5.92446	7.91501	9.90561	7.94936	6.92879
ENSMUSG00000072969	-0.392111	3.20838	14.8923	0.361392	armadillo repeat containing, X-linked 5 [Source:MGI Symbol;Acc:MGI:2148026]	Armcx5	5.94718	6.91187	5.93626	8.91505	7.94936	7.91862
ENSMUSG00000022359	-0.392111	3.20838	8.42407	0.361392	WDYHV motif containing 1 [Source:MGI Symbol;Acc:MGI:1924023]	Wdyhv1	6.93837	5.92446	5.93626	6.93392	8.94303	8.90845
ENSMUSG00000034755	-0.391253	3.82729	4.96017	0.24078	protocadherin 11 X-linked [Source:MGI Symbol;Acc:MGI:2442849]	Pcdh11x	10.9032	8.88669	11.8725	12.8773	16.8924	11.8779
ENSMUSG00000034300	-0.391253	3.8273	2.81758	0.24078	family with sequence similarity 53, member C [Source:MGI Symbol;Acc:MGI:1913556]	Fam53c	11.8944	7.89928	11.8725	11.8867	17.8861	11.8779
ENSMUSG00000027961	-0.391253	3.82729	18.927	0.24078	leucine rich repeat containing 39 [Source:MGI Symbol;Acc:MGI:1924557]	Lrrc39	9.91196	10.8615	10.8831	14.8584	12.9177	13.8576
ENSMUSG00000022906	-0.390554	4.86046	36.2	0.0829931	poly (ADP-ribose) polymerase family, member 9 [Source:MGI Symbol;Acc:MGI:1933117]	Parp9	23.7887	22.7104	23.745	30.7074	31.7974	29.6948
ENSMUSG00000027109	-0.390251	5.87675	2.62681	0.155186	trans-acting transcription factor 3 [Source:MGI Symbol;Acc:MGI:1277166]	Sp3	36.6743	57.2698	53.4263	84.1977	52.6645	56.4202
ENSMUSG00000020873	0.346707	6.04847	18.7198	0.0179926	solute carrier family 35, member B1 [Source:MGI Symbol;Acc:MGI:1343133]	Slc35b1	71.3661	67.1439	77.1713	56.462	60.6139	52.4609
ENSMUSG00000071172	-0.389189	4.51998	2.10651	0.195888	serine/arginine-rich splicing factor 3 [Source:MGI Symbol;Acc:MGI:98285]	Srsf3	20.8151	12.8363	20.7769	19.8112	31.7974	19.7966
ENSMUSG00000022089	-0.389189	4.51997	15.441	0.12794	bridging integrator 3 [Source:MGI Symbol;Acc:MGI:1929883]	Bin3	17.8415	19.7482	16.8194	23.7735	21.8607	25.7355
ENSMUSG00000032475	-0.389189	4.51997	7.48882	0.12794	non-catalytic region of tyrosine kinase adaptor protein 1 [Source:MGI Symbol;Acc:MGI:109601]	Nck1	19.8239	18.7608	15.83	20.8018	22.8544	27.7152
ENSMUSG00000068699	0.345872	9.26474	78.681	0.000101723	filamin C, gamma [Source:MGI Symbol;Acc:MGI:95557]	Flnc	703.749	687.237	667.829	526.978	538.569	554.303
ENSMUSG00000037740	0.344881	5.64419	10.0661	0.0416697	mitochondrial ribosomal protein S26 [Source:MGI Symbol;Acc:MGI:1333830]	Mrps26	60.463	50.3579	50.4582	37.6413	44.7151	44.5422
ENSMUSG00000003382	-0.388948	4.16921	8.4021	0.182863	ets variant 3 [Source:MGI Symbol;Acc:MGI:1350926]	Etv3	11.8944	14.8111	14.8406	20.8018	16.8924	16.8271
ENSMUSG00000014232	-0.388948	4.16921	22.5562	0.182863	clusterin associated protein 1 [Source:MGI Symbol;Acc:MGI:1924029]	Cluap1	14.8679	13.8237	12.8619	17.8301	17.8861	18.8067
ENSMUSG00000049624	-0.388495	3.70481	5.31124	0.267195	solute carrier family 17 (anion/sugar transporter), member 5 [Source:MGI Symbol;Acc:MGI:1924105]	Slc17a5	9.91196	7.89928	10.8831	11.8867	14.905	10.8881
ENSMUSG00000005774	-0.388495	3.7048	8.22881	0.267195	regulatory factor X, 5 (influences HLA class II expression) [Source:MGI Symbol;Acc:MGI:1858421]	Rfx5	7.92957	10.8615	9.89376	13.8678	11.924	11.8779
ENSMUSG00000034730	0.34377	9.24043	6.17063	0.046733	adhesion G protein-coupled receptor B1 [Source:MGI Symbol;Acc:MGI:1933736]	Adgrb1	585.797	777.091	659.914	604.242	455.101	534.507
ENSMUSG00000092558	-0.38732	3.01573	16.0337	0.406842	mediator complex subunit 20 [Source:MGI Symbol;Acc:MGI:1929648]	Med20	4.95598	5.92446	4.94688	6.93392	6.95569	6.92879
ENSMUSG00000044617	-0.38732	3.01573	2.8454	0.406842	zinc finger and BTB domain containing 39 [Source:MGI Symbol;Acc:MGI:2443316]	Zbtb39	3.96479	5.92446	5.93626	8.91505	5.96202	5.93897
ENSMUSG00000040877	-0.38732	3.01574	1.92683	0.406842	WD repeat domain 25 [Source:MGI Symbol;Acc:MGI:3045255]	Wdr25	6.93837	3.94964	4.94688	4.9528	8.94303	6.92879
ENSMUSG00000017607	-0.38732	3.01573	1.9701	0.406842	tensin 4 [Source:MGI Symbol;Acc:MGI:2144377]	Tns4	3.96479	6.91187	4.94688	8.91505	4.96835	6.92879
ENSMUSG00000040936	-0.38732	3.01573	7.75746	0.406842	unc-51-like kinase 4 [Source:MGI Symbol;Acc:MGI:1921622]	Ulk4	4.95598	5.92446	4.94688	7.92448	5.96202	6.92879
ENSMUSG00000042165	-0.38732	3.01573	7.77865	0.406842	predicted pseudogene 9774 [Source:MGI Symbol;Acc:MGI:3642386]	Gm9774	4.95598	5.92446	4.94688	6.93392	5.96202	7.91862
ENSMUSG00000038323	-0.38732	3.01573	1.96944	0.406842	RIKEN cDNA 1700066M21 gene [Source:MGI Symbol;Acc:MGI:1920717]	1700066M21Rik	4.95598	6.91187	3.9575	6.93392	4.96835	8.90845
ENSMUSG00000029131	-0.38732	3.01573	2.83982	0.406842	DnaJ heat shock protein family (Hsp40) member B6 [Source:MGI Symbol;Acc:MGI:1344381]	Dnajb6	5.94718	5.92446	3.9575	5.94336	5.96202	8.90845
ENSMUSG00000025940	0.343417	6.30791	21.295	0.0101812	transmembrane protein 70 [Source:MGI Symbol;Acc:MGI:1915068]	Tmem70	93.1725	81.955	84.097	63.3959	71.5442	69.2879
ENSMUSG00000028743	0.339068	6.22118	25.8125	0.013875	aldo-keto reductase family 7, member A5 (aflatoxin aldehyde reductase) [Source:MGI Symbol;Acc:MGI:107796]	Akr7a5	84.2517	82.9424	76.1819	61.4148	62.6012	68.2981
ENSMUSG00000004798	-0.386712	4.07345	2.82112	0.201785	unc-51 like kinase 2 [Source:MGI Symbol;Acc:MGI:1352758]	Ulk2	9.91196	13.8237	14.8406	21.7923	14.905	13.8576
ENSMUSG00000025647	-0.386552	4.67715	8.23982	0.108842	shisa family member 5 [Source:MGI Symbol;Acc:MGI:1915044]	Shisa5	17.8415	22.7104	20.7769	30.7074	23.8481	25.7355
ENSMUSG00000073705	-0.386552	4.67715	17.4198	0.108842	apoptosis-inducing, TAF9-like domain 1 [Source:MGI Symbol;Acc:MGI:1917178]	Apitd1	21.8063	20.7356	18.7981	24.764	26.8291	28.705
ENSMUSG00000027287	-0.386478	5.10147	9.94604	0.0609062	synaptosomal-associated protein 23 [Source:MGI Symbol;Acc:MGI:109356]	Snap23	24.7799	27.6475	31.66	40.613	36.7658	32.6643
ENSMUSG00000054051	-0.38585	4.87677	9.35396	0.0848525	excision repair cross-complementing rodent repair deficiency, complementation group 6 [Source:MGI Symbol;Acc:MGI:1100494]	Ercc6	22.7975	21.723	26.7132	32.6885	33.7848	26.7253
ENSMUSG00000003680	0.338625	6.3523	13.1221	0.0106752	TATA-box binding protein associated factor 6 like [Source:MGI Symbol;Acc:MGI:2444957]	Taf6l	97.1372	80.9676	89.0438	64.3864	76.5126	70.2778
ENSMUSG00000032376	-0.385318	5.05207	2.34655	0.175442	ubiquitin specific peptidase 3 [Source:MGI Symbol;Acc:MGI:2152450]	Usp3	19.8239	29.6223	31.66	46.5563	30.8038	28.705
ENSMUSG00000021982	-0.385101	3.57095	9.04066	0.297299	cytidine and dCMP deaminase domain containing 1 [Source:MGI Symbol;Acc:MGI:1919141]	Cdadc1	7.92957	9.8741	7.91501	11.8867	9.9367	11.8779
ENSMUSG00000021697	-0.385101	3.57095	19.2769	0.297299	DEP domain containing 1B [Source:MGI Symbol;Acc:MGI:2145425]	Depdc1b	8.92077	8.88669	7.91501	10.8962	10.9304	11.8779
ENSMUSG00000042396	-0.384945	4.61048	29.697	0.119314	RNA binding motif protein 7 [Source:MGI Symbol;Acc:MGI:1914260]	Rbm7	19.8239	19.7482	18.7981	24.764	24.8417	26.7253
ENSMUSG00000040010	0.338011	8.4964	16.389	0.00645347	solute carrier family 7 (cationic amino acid transporter, y+ system), member 5 [Source:MGI Symbol;Acc:MGI:1298205]	Slc7a5	440.091	381.14	381.899	288.253	332.879	330.602
ENSMUSG00000035559	0.337908	6.3049	13.0113	0.0115374	MPV17 mitochondrial membrane protein-like 2 [Source:MGI Symbol;Acc:MGI:2681846]	Mpv17l2	95.1549	81.955	81.1288	61.4148	70.5506	72.2574
ENSMUSG00000023484	0.336529	9.73696	7.82243	0.0306131	peripherin [Source:MGI Symbol;Acc:MGI:97774]	Prph	1089.32	874.845	886.481	650.798	808.847	797.801
ENSMUSG00000028274	-0.382574	5.11528	13.8399	0.0622128	RNA guanylyltransferase and 5'-phosphatase [Source:MGI Symbol;Acc:MGI:1329041]	Rngtt	30.7271	28.6349	25.7238	33.6791	36.7658	40.5829
ENSMUSG00000032412	-0.381283	5.06637	17.5978	0.0679039	ATPase, Na+/K+ transporting, beta 3 polypeptide [Source:MGI Symbol;Acc:MGI:107788]	Atp1b3	29.7359	25.6726	26.7132	32.6885	37.7595	36.6236
ENSMUSG00000027104	-0.381227	4.69565	3.66379	0.111288	activating transcription factor 2 [Source:MGI Symbol;Acc:MGI:109349]	Atf2	16.8503	19.7482	25.7238	31.6979	27.8228	21.7762
ENSMUSG00000064090	-0.381227	4.69565	15.6584	0.111288	vaccinia related kinase 2 [Source:MGI Symbol;Acc:MGI:1917172]	Vrk2	19.8239	19.7482	22.7556	28.7263	27.8228	24.7457
ENSMUSG00000023004	0.333902	6.74085	23.8872	0.00359279	tubulin, alpha 1B [Source:MGI Symbol;Acc:MGI:107804]	Tuba1b	110.023	116.514	124.661	98.0655	93.405	87.1048
ENSMUSG00000061286	0.333686	5.64894	28.2123	0.048324	exosome component 5 [Source:MGI Symbol;Acc:MGI:107889]	Exosc5	56.4982	52.3327	52.4369	40.613	43.7215	43.5524
ENSMUSG00000030588	0.3331	7.50167	38.1777	0.00076375	Yip1 interacting factor homolog B (S. cerevisiae) [Source:MGI Symbol;Acc:MGI:1924504]	Yif1b	202.204	189.583	207.769	156.509	166.937	152.433
ENSMUSG00000026987	-0.380416	5.57095	5.40701	0.0581475	bromodomain adjacent to zinc finger domain, 2B [Source:MGI Symbol;Acc:MGI:2442782]	Baz2b	32.7095	41.4712	44.5219	61.4148	48.6898	44.5422
ENSMUSG00000043257	-0.380351	2.79334	1.63142	0.461136	phosphatidylinositol glycan anchor biosynthesis, class V [Source:MGI Symbol;Acc:MGI:2442480]	Pigv	2.97359	3.94964	5.93626	6.93392	5.96202	3.95931
ENSMUSG00000096916	-0.380351	2.79334	2.7222	0.461136	zinc finger protein 850 [Source:MGI Symbol;Acc:MGI:3036281]	Zfp850	2.97359	4.93705	4.94688	6.93392	4.96835	4.94914
ENSMUSG00000041809	-0.380351	2.79334	8.40452	0.461136	EF-hand domain (C-terminal) containing 1 [Source:MGI Symbol;Acc:MGI:1919127]	Efhc1	3.96479	3.94964	4.94688	5.94336	5.96202	4.94914
ENSMUSG00000064202	-0.380351	2.79334	8.40452	0.461136	RIKEN cDNA 4430402I18 gene [Source:MGI Symbol;Acc:MGI:1918036]	4430402I18Rik	3.96479	3.94964	4.94688	5.94336	5.96202	4.94914
ENSMUSG00000069274	-0.380351	2.79334	8.40452	0.461136	histone cluster 1, H4f [Source:MGI Symbol;Acc:MGI:2448425]	Hist1h4f	3.96479	3.94964	4.94688	5.94336	5.96202	4.94914
ENSMUSG00000026492	-0.380351	2.79334	8.66111	0.461136	transcription factor B2, mitochondrial [Source:MGI Symbol;Acc:MGI:107937]	Tfb2m	3.96479	4.93705	3.9575	5.94336	4.96835	5.93897
ENSMUSG00000078495	-0.380351	2.79334	8.66111	0.461136	zinc finger protein 984 [Source:MGI Symbol;Acc:MGI:3651978]	Zfp984	3.96479	4.93705	3.9575	5.94336	4.96835	5.93897
ENSMUSG00000024486	-0.380351	2.79334	8.35816	0.461136	heparin-binding EGF-like growth factor [Source:MGI Symbol;Acc:MGI:96070]	Hbegf	4.95598	3.94964	3.9575	4.9528	5.96202	5.93897
ENSMUSG00000032305	-0.380351	2.79334	8.35816	0.461136	family with sequence similarity 219, member B [Source:MGI Symbol;Acc:MGI:1925573]	Fam219b	4.95598	3.94964	3.9575	4.9528	5.96202	5.93897
ENSMUSG00000047712	-0.380351	2.79334	8.35816	0.461136	uronyl-2-sulfotransferase [Source:MGI Symbol;Acc:MGI:2442406]	Ust	4.95598	3.94964	3.9575	4.9528	5.96202	5.93897
ENSMUSG00000052854	-0.380351	2.79334	8.35816	0.461136	Nik related kinase [Source:MGI Symbol;Acc:MGI:1351326]	Nrk	4.95598	3.94964	3.9575	4.9528	5.96202	5.93897
ENSMUSG00000079659	-0.380351	2.79334	8.35816	0.461136	transmembrane protein 243, mitochondrial [Source:MGI Symbol;Acc:MGI:3606159]	Tmem243	4.95598	3.94964	3.9575	4.9528	5.96202	5.93897
ENSMUSG00000022330	-0.380351	2.79334	2.71245	0.461136	odd-skipped related 2 [Source:MGI Symbol;Acc:MGI:1930813]	Osr2	4.95598	4.93705	2.96813	4.9528	4.96835	6.92879
ENSMUSG00000025525	-0.379028	5.27754	5.75907	0.0524659	apolipoprotein O-like [Source:MGI Symbol;Acc:MGI:1915367]	Apool	26.7623	35.5467	33.6388	49.528	36.7658	38.6033
ENSMUSG00000028063	0.332514	9.12085	5.93715	0.0498751	lamin A [Source:MGI Symbol;Acc:MGI:96794]	Lmna	720.6	554.924	579.774	416.035	540.556	516.69
ENSMUSG00000029547	0.332066	8.39253	9.28056	0.0220351	integrator complex subunit 1 [Source:MGI Symbol;Acc:MGI:1915760]	Ints1	421.258	348.556	347.271	259.527	314	313.775
ENSMUSG00000021067	-0.377313	3.74088	30.9855	0.274175	salvador family WW domain containing 1 [Source:MGI Symbol;Acc:MGI:1927144]	Sav1	9.91196	9.8741	9.89376	12.8773	12.9177	12.8678
ENSMUSG00000041313	0.331764	7.91867	39.4292	0.00070016	solute carrier family 7 (cationic amino acid transporter, y+ system), member 1 [Source:MGI Symbol;Acc:MGI:88117]	Slc7a1	277.535	253.764	271.089	205.046	223.576	208.854
ENSMUSG00000026034	-0.376641	5.54569	4.87857	0.0683484	CDC-like kinase 1 [Source:MGI Symbol;Acc:MGI:107403]	Clk1	31.7183	40.4838	44.5219	60.4242	47.6961	43.5524
ENSMUSG00000006010	-0.376432	5.18893	41.78	0.0594296	cDNA sequence BC003331 [Source:MGI Symbol;Acc:MGI:2385108]	BC003331	29.7359	30.6097	29.6813	39.6224	37.7595	39.5931
ENSMUSG00000079283	-0.375273	3.25901	2.57481	0.371944	RIKEN cDNA 2310009B15 gene [Source:MGI Symbol;Acc:MGI:1916799]	2310009B15Rik	7.92957	4.93705	6.92563	6.93392	10.9304	7.91862
ENSMUSG00000002550	-0.375273	3.259	8.59992	0.371944	uridine-cytidine kinase 1 [Source:MGI Symbol;Acc:MGI:98904]	Uck1	6.93837	6.91187	5.93626	7.92448	7.94936	9.89828
ENSMUSG00000051344	-0.375112	4.00094	19.2147	0.22851	pleckstrin homology domain containing, family M, member 3 [Source:MGI Symbol;Acc:MGI:2443627]	Plekhm3	11.8944	11.8489	12.8619	15.849	16.8924	14.8474
ENSMUSG00000023170	-0.37388	5.55584	3.40267	0.113634	G protein pathway suppressor 2 [Source:MGI Symbol;Acc:MGI:1891751]	Gps2	30.7271	45.4208	41.5538	63.3959	42.7278	46.5219
ENSMUSG00000051279	0.329671	7.30942	6.03697	0.0484981	growth differentiation factor 6 [Source:MGI Symbol;Acc:MGI:95689]	Gdf6	201.213	154.036	168.194	118.867	156.006	141.545
ENSMUSG00000020744	-0.373603	4.2212	7.76803	0.191687	solute carrier family 25 (mitochondrial thiamine pyrophosphate carrier), member 19 [Source:MGI Symbol;Acc:MGI:1914533]	Slc25a19	12.8856	14.8111	15.83	21.7923	17.8861	16.8271
ENSMUSG00000022561	0.32881	5.70936	13.0861	0.0467598	GPI anchor attachment protein 1 [Source:MGI Symbol;Acc:MGI:1202392]	Gpaa1	60.463	51.3453	56.3944	41.6035	48.6898	43.5524
ENSMUSG00000033762	-0.372504	4.41225	27.7533	0.161602	RecQ protein-like 4 [Source:MGI Symbol;Acc:MGI:1931028]	Recql4	16.8503	16.786	16.8194	22.7829	21.8607	20.7864
ENSMUSG00000023952	-0.372402	4.92459	40.8547	0.0904222	GTP binding protein 2 [Source:MGI Symbol;Acc:MGI:1860138]	Gtpbp2	24.7799	24.6852	24.7344	31.6979	31.7974	32.6643
ENSMUSG00000035958	-0.372349	5.30189	6.12379	0.0520387	tyrosyl-DNA phosphodiesterase 2 [Source:MGI Symbol;Acc:MGI:1860486]	Tdp2	27.7535	33.5719	36.6069	49.528	40.7405	36.6236
ENSMUSG00000072115	-0.371309	3.89287	4.98541	0.253099	angiogenin, ribonuclease, RNase A family, 5 [Source:MGI Symbol;Acc:MGI:88022]	Ang	8.92077	12.8363	11.8725	16.8395	12.9177	13.8576
ENSMUSG00000079036	-0.371309	3.89288	11.9774	0.253099	alkB homolog 1, histone H2A dioxygenase [Source:MGI Symbol;Acc:MGI:2384034]	Alkbh1	9.91196	11.8489	11.8725	15.849	13.9114	13.8576
ENSMUSG00000018449	-0.371011	4.73195	30.1941	0.116154	RPA interacting protein [Source:MGI Symbol;Acc:MGI:1916973]	Rpain	21.8063	20.7356	21.7663	27.7357	28.8164	26.7253
ENSMUSG00000028411	-0.371011	4.73194	2.51848	0.162606	aprataxin [Source:MGI Symbol;Acc:MGI:1913658]	Aptx	23.7887	24.6852	15.83	23.7735	23.8481	35.6338
ENSMUSG00000058291	-0.370481	4.86863	7.6266	0.0989057	zinc finger protein 68 [Source:MGI Symbol;Acc:MGI:1344427]	Zfp68	20.8151	23.6978	26.7132	34.6696	30.8038	26.7253
ENSMUSG00000063952	-0.370481	4.86864	29.5354	0.0989057	bromodomain and PHD finger containing, 3 [Source:MGI Symbol;Acc:MGI:2146836]	Brpf3	23.7887	22.7104	24.7344	30.7074	31.7974	29.6948
ENSMUSG00000052915	-0.370331	4.12895	19.6256	0.211557	male-specific lethal 1 homolog (Drosophila) [Source:MGI Symbol;Acc:MGI:1921276]	Msl1	12.8856	13.8237	13.8513	18.8207	16.8924	16.8271
ENSMUSG00000054237	-0.369636	4.33176	22.9536	0.177862	FRA10AC1 homolog (human) [Source:MGI Symbol;Acc:MGI:1917817]	Fra10ac1	14.8679	15.7986	16.8194	20.8018	20.8671	19.7966
ENSMUSG00000026380	-0.369283	2.53031	5.3883	0.527824	transcription factor CP2-like 1 [Source:MGI Symbol;Acc:MGI:2444691]	Tfcp2l1	3.96479	2.96223	2.96813	3.96224	4.96835	3.95931
ENSMUSG00000059939	-0.369283	2.53031	5.3883	0.527824	RIKEN cDNA 9430015G10 gene [Source:MGI Symbol;Acc:MGI:2444364]	9430015G10Rik	3.96479	2.96223	2.96813	3.96224	4.96835	3.95931
ENSMUSG00000037139	-0.369283	2.53031	5.57792	0.527824	myomesin family, member 3 [Source:MGI Symbol;Acc:MGI:2685280]	Myom3	2.97359	3.94964	2.96813	3.96224	3.97468	4.94914
ENSMUSG00000026870	-0.369283	2.53031	2.55128	0.527824	cutA divalent cation tolerance homolog-like [Source:MGI Symbol;Acc:MGI:1925246]	Cutal	3.96479	2.96223	2.96813	2.97168	4.96835	4.94914
ENSMUSG00000066357	0.328523	8.69561	23.5017	0.00269929	WD repeat domain 6 [Source:MGI Symbol;Acc:MGI:1930140]	Wdr6	493.616	438.41	446.209	339.762	382.563	375.145
ENSMUSG00000053641	-0.368391	4.81042	24.5535	0.108255	DENN/MADD domain containing 4A [Source:MGI Symbol;Acc:MGI:2142979]	Dennd4a	21.8063	22.7104	23.745	30.7074	29.8101	27.7152
ENSMUSG00000030359	-0.367768	3.07345	2.47585	0.419022	pregnancy zone protein [Source:MGI Symbol;Acc:MGI:87854]	Pzp	3.96479	6.91187	5.93626	8.91505	5.96202	6.92879
ENSMUSG00000056531	-0.367768	3.07345	4.14726	0.419022	coiled-coil domain containing 18 [Source:MGI Symbol;Acc:MGI:1922974]	Ccdc18	4.95598	6.91187	4.94688	7.92448	5.96202	7.91862
ENSMUSG00000035697	-0.367768	3.07345	4.03089	0.419022	histocompatibility (minor) HA-1 [Source:MGI Symbol;Acc:MGI:1917969]	Hmha1	6.93837	4.93705	4.94688	5.94336	7.94936	7.91862
ENSMUSG00000024539	-0.367566	5.27139	8.25597	0.0578339	protein tyrosine phosphatase, non-receptor type 2 [Source:MGI Symbol;Acc:MGI:97806]	Ptpn2	27.7535	32.5845	35.6175	46.5563	40.7405	36.6236
ENSMUSG00000053483	-0.367123	3.46712	3.07959	0.340725	ubiquitin specific peptidase 21 [Source:MGI Symbol;Acc:MGI:1353665]	Usp21	6.93837	6.91187	9.89376	10.8962	11.924	7.91862
ENSMUSG00000046434	-0.367123	3.46712	6.08651	0.340725	heterogeneous nuclear ribonucleoprotein A1 [Source:MGI Symbol;Acc:MGI:104820]	Hnrnpa1	8.92077	6.91187	7.91501	8.91505	11.924	9.89828
ENSMUSG00000025193	-0.367123	3.46711	2.82395	0.340725	cutC copper transporter [Source:MGI Symbol;Acc:MGI:1913638]	Cutc	8.92077	8.88669	5.93626	8.91505	8.94303	12.8678
ENSMUSG00000072082	0.328445	6.2652	27.3663	0.0154608	cyclin F [Source:MGI Symbol;Acc:MGI:102551]	Ccnf	81.2781	80.9676	88.0545	68.3487	68.5632	62.3591
ENSMUSG00000042348	-0.366765	3.77606	20.3696	0.280969	ADP-ribosylation factor-like 15 [Source:MGI Symbol;Acc:MGI:2442308]	Arl15	9.91196	10.8615	9.89376	13.8678	12.9177	12.8678
ENSMUSG00000028549	-0.366765	3.77606	2.17754	0.280969	integrin beta 3 binding protein (beta3-endonexin) [Source:MGI Symbol;Acc:MGI:1914983]	Itgb3bp	9.91196	12.8363	7.91501	12.8773	9.9367	16.8271
ENSMUSG00000062115	0.328261	6.29279	12.3484	0.0145316	retinoic acid induced 1 [Source:MGI Symbol;Acc:MGI:103291]	Rai1	79.2957	81.955	93.9907	72.3109	69.5569	61.3693
ENSMUSG00000046330	-0.366538	4.03037	0.964248	0.363298	ribosomal protein L37a [Source:MGI Symbol;Acc:MGI:98068]	Rpl37a	7.92957	16.786	12.8619	23.7735	10.9304	13.8576
ENSMUSG00000033581	-0.366538	4.03038	13.0765	0.233879	insulin-like growth factor 2 mRNA binding protein 2 [Source:MGI Symbol;Acc:MGI:1890358]	Igf2bp2	13.8767	11.8489	11.8725	14.8584	16.8924	16.8271
ENSMUSG00000030980	-0.365807	5.73641	3.15944	0.124802	lysine rich nucleolar protein 1 [Source:MGI Symbol;Acc:MGI:1913606]	Knop1	34.6919	51.3453	48.4794	72.3109	48.6898	52.4609
ENSMUSG00000002014	0.327263	6.98221	33.0768	0.00188802	signal sequence receptor, delta [Source:MGI Symbol;Acc:MGI:1099464]	Ssr4	144.715	131.325	139.502	105.99	116.259	108.881
ENSMUSG00000072825	0.325357	7.02307	8.65286	0.0252729	centrosomal protein 170B [Source:MGI Symbol;Acc:MGI:2145043]	Cep170b	161.565	132.313	133.566	100.047	121.228	119.769
ENSMUSG00000001150	0.324747	7.76735	11.3847	0.0145012	minichromosome maintenance complex component 3 associated protein [Source:MGI Symbol;Acc:MGI:1930089]	Mcm3ap	253.746	214.268	252.291	180.282	213.639	181.138
ENSMUSG00000030256	-0.363368	4.53031	16.3167	0.153402	basic helix-loop-helix family, member e41 [Source:MGI Symbol;Acc:MGI:1930704]	Bhlhe41	19.8239	17.7734	17.8088	21.7923	24.8417	24.7457
ENSMUSG00000062694	0.322761	6.70935	6.89279	0.0385493	caveolin 3 [Source:MGI Symbol;Acc:MGI:107570]	Cav3	129.847	110.59	101.906	79.2448	93.405	100.962
ENSMUSG00000078851	0.320004	9.92923	8.11448	0.0285765	histone cluster 3, H2a [Source:MGI Symbol;Acc:MGI:2448458]	Hist3h2a	1225.12	989.384	1026.97	757.779	937.031	901.733
ENSMUSG00000037466	-0.362657	4.15591	5.06983	0.216328	RIKEN cDNA 4930427A07 gene [Source:MGI Symbol;Acc:MGI:2144738]	4930427A07Rik	13.8767	15.7986	11.8725	17.8301	14.905	20.7864
ENSMUSG00000053877	-0.36209	3.92459	6.49654	0.259054	Snf2-related CREBBP activator protein [Source:MGI Symbol;Acc:MGI:2444036]	Srcap	9.91196	11.8489	12.8619	16.8395	14.905	12.8678
ENSMUSG00000026520	0.31856	6.60068	7.89293	0.0301041	pyrroline-5-carboxylate reductase family, member 2 [Source:MGI Symbol;Acc:MGI:1277956]	Pycr2	117.952	104.665	93.9907	75.2826	84.4619	94.0336
ENSMUSG00000044700	0.317463	6.62739	5.95522	0.049622	transmembrane protein 201 [Source:MGI Symbol;Acc:MGI:1196277]	Tmem201	95.1549	123.426	103.884	96.0844	74.5252	88.0947
ENSMUSG00000070639	-0.361242	3.64895	5.04148	0.312746	leucine rich repeat containing 8 family, member B [Source:MGI Symbol;Acc:MGI:2141353]	Lrrc8b	7.92957	8.88669	10.8831	12.8773	12.9177	9.89828
ENSMUSG00000033543	-0.361242	3.64896	4.42559	0.312746	general transcription factor II A, 2 [Source:MGI Symbol;Acc:MGI:1933289]	Gtf2a2	10.9032	7.89928	8.90438	9.90561	13.9114	11.8779
ENSMUSG00000041688	-0.361242	3.64895	1.41453	0.312746	angiomotin [Source:MGI Symbol;Acc:MGI:108440]	Amot	9.91196	11.8489	5.93626	10.8962	8.94303	15.8372
ENSMUSG00000032306	0.316842	6.14247	12.4687	0.0252986	mannose phosphate isomerase [Source:MGI Symbol;Acc:MGI:97075]	Mpi	80.2869	78.9928	69.2563	57.4525	58.6265	67.3083
ENSMUSG00000030269	-0.359872	4.97088	5.70559	0.095972	myotubularin related protein 14 [Source:MGI Symbol;Acc:MGI:1916075]	Mtmr14	21.8063	26.6601	28.6919	38.6319	31.7974	28.705
ENSMUSG00000060301	-0.359838	3.30791	1.65588	0.381991	RIKEN cDNA 2610008E11 gene [Source:MGI Symbol;Acc:MGI:1919378]	2610008E11Rik	4.95598	6.91187	8.90438	11.8867	7.94936	6.92879
ENSMUSG00000043262	-0.359838	3.30791	26.364	0.381991	UEV and lactate/malate dehyrogenase domains [Source:MGI Symbol;Acc:MGI:1860490]	Uevld	6.93837	6.91187	6.92563	8.91505	8.94303	8.90845
ENSMUSG00000033739	-0.359838	3.30792	6.79338	0.381991	FK506 binding protein-like [Source:MGI Symbol;Acc:MGI:1932127]	Fkbpl	7.92957	6.91187	5.93626	7.92448	8.94303	9.89828
ENSMUSG00000079469	-0.359838	3.30792	6.79338	0.381991	phosphatidylinositol glycan anchor biosynthesis, class B [Source:MGI Symbol;Acc:MGI:1891825]	Pigb	7.92957	6.91187	5.93626	7.92448	8.94303	9.89828
ENSMUSG00000014313	0.316583	5.98222	16.2883	0.0347622	cytochrome c oxidase subunit VIc [Source:MGI Symbol;Acc:MGI:104614]	Cox6c	66.4102	64.1816	73.2138	55.4714	57.6328	50.4812
ENSMUSG00000027405	0.315366	7.33177	6.59093	0.0417151	NOP56 ribonucleoprotein [Source:MGI Symbol;Acc:MGI:1914384]	Nop56	195.266	153.048	181.056	126.792	161.968	136.596
ENSMUSG00000035614	-0.358641	4.7048	3.98697	0.132601	family with sequence similarity 179, member B [Source:MGI Symbol;Acc:MGI:2684313]	Fam179b	16.8503	22.7104	23.745	32.6885	24.8417	23.7559
ENSMUSG00000020413	-0.358353	4.05924	26.4866	0.239146	HUS1 checkpoint clamp component [Source:MGI Symbol;Acc:MGI:1277962]	Hus1	12.8856	12.8363	12.8619	16.8395	15.8987	16.8271
ENSMUSG00000020700	-0.357799	4.55077	6.38694	0.156566	mitogen-activated protein kinase kinase kinase 3 [Source:MGI Symbol;Acc:MGI:1346874]	Map3k3	19.8239	20.7356	15.83	22.7829	21.8607	27.7152
ENSMUSG00000020238	0.315224	6.9841	9.96576	0.0191032	nicalin [Source:MGI Symbol;Acc:MGI:1926081]	Ncln	154.627	130.338	129.608	99.0561	117.253	116.8
ENSMUSG00000020653	-0.35751	4.91671	2.63697	0.154515	Kruppel-like factor 11 [Source:MGI Symbol;Acc:MGI:2653368]	Klf11	19.8239	31.5971	22.7556	37.6413	24.8417	32.6643
ENSMUSG00000057561	-0.35751	4.91673	18.8539	0.104955	eukaryotic translation initiation factor 1A [Source:MGI Symbol;Acc:MGI:95298]	Eif1a	26.7623	23.6978	23.745	29.7168	32.7911	32.6643
ENSMUSG00000055210	-0.357064	2.86046	3.05785	0.475346	forkhead box D2 [Source:MGI Symbol;Acc:MGI:1347471]	Foxd2	3.96479	3.94964	5.93626	5.94336	6.95569	4.94914
ENSMUSG00000038403	-0.357064	2.86045	5.13569	0.475346	hemochromatosis type 2 (juvenile) [Source:MGI Symbol;Acc:MGI:1916835]	Hfe2	3.96479	4.93705	4.94688	6.93392	5.96202	4.94914
ENSMUSG00000057894	-0.357064	2.86045	5.13569	0.475346	zinc finger protein 329 [Source:MGI Symbol;Acc:MGI:1921283]	Zfp329	3.96479	4.93705	4.94688	6.93392	5.96202	4.94914
ENSMUSG00000039159	-0.357064	2.86045	1.46708	0.475346	ubiquitin-conjugating enzyme E2H [Source:MGI Symbol;Acc:MGI:104632]	Ube2h	2.97359	4.93705	5.93626	7.92448	4.96835	4.94914
ENSMUSG00000027713	-0.357064	2.86045	5.20202	0.475346	RIKEN cDNA 1810062G17 gene [Source:MGI Symbol;Acc:MGI:1919532]	1810062G17Rik	3.96479	4.93705	4.94688	6.93392	4.96835	5.93897
ENSMUSG00000042766	-0.357064	2.86045	5.20202	0.475346	tripartite motif-containing 46 [Source:MGI Symbol;Acc:MGI:2673000]	Trim46	3.96479	4.93705	4.94688	6.93392	4.96835	5.93897
ENSMUSG00000059423	-0.357064	2.86045	5.20202	0.475346	zinc finger protein 933 [Source:MGI Symbol;Acc:MGI:1922865]	Zfp933	3.96479	4.93705	4.94688	6.93392	4.96835	5.93897
ENSMUSG00000040253	-0.357064	2.86046	11.1864	0.475346	guanylate binding protein 7 [Source:MGI Symbol;Acc:MGI:2444421]	Gbp7	4.95598	3.94964	4.94688	5.94336	5.96202	5.93897
ENSMUSG00000022130	-0.356799	3.81041	2.49694	0.287584	TDP-glucose 4,6-dehydratase [Source:MGI Symbol;Acc:MGI:1923605]	Tgds	7.92957	12.8363	10.8831	16.8395	10.9304	12.8678
ENSMUSG00000019992	-0.356799	3.81042	19.2127	0.287584	mitochondrial fission regulator 2 [Source:MGI Symbol;Acc:MGI:1919054]	Mtfr2	10.9032	10.8615	9.89376	12.8773	13.9114	13.8576
ENSMUSG00000029524	-0.356799	3.81042	19.2127	0.287584	sirtuin 4 [Source:MGI Symbol;Acc:MGI:1922637]	Sirt4	10.9032	10.8615	9.89376	12.8773	13.9114	13.8576
ENSMUSG00000051367	-0.356723	4.37832	2.76005	0.185576	sine oculis-related homeobox 1 [Source:MGI Symbol;Acc:MGI:102780]	Six1	18.8327	12.8363	17.8088	17.8301	26.8291	18.8067
ENSMUSG00000043154	-0.356643	5.58093	2.91848	0.137417	protein phosphatase 2, regulatory subunit B'', alpha [Source:MGI Symbol;Acc:MGI:2442104]	Ppp2r3a	30.7271	46.4083	43.5325	64.3864	43.7215	46.5219
ENSMUSG00000032875	0.314857	7.38684	42.3691	0.000576121	Rho guanine nucleotide exchange factor (GEF) 17 [Source:MGI Symbol;Acc:MGI:2673002]	Arhgef17	190.31	183.658	176.109	141.65	147.063	153.423
ENSMUSG00000022565	0.314265	6.95367	54.2586	0.00312806	plectin [Source:MGI Symbol;Acc:MGI:1277961]	Plec	137.776	137.25	130.598	106.981	107.316	111.851
ENSMUSG00000024899	-0.356013	5.26522	20.2159	0.0667034	3'-phosphoadenosine 5'-phosphosulfate synthase 2 [Source:MGI Symbol;Acc:MGI:1330223]	Papss2	29.7359	32.5845	33.6388	43.5847	40.7405	38.6033
ENSMUSG00000049339	0.31409	6.24335	18.5359	0.0215414	family with sequence similarity 134, member A [Source:MGI Symbol;Acc:MGI:2388278]	Fam134a	77.3133	87.8795	80.1395	69.3392	61.6075	66.3184
ENSMUSG00000053094	-0.355274	5.16258	11.3489	0.0779222	transmembrane protein 248 [Source:MGI Symbol;Acc:MGI:1918917]	Tmem248	27.7535	28.6349	32.6494	40.613	39.7468	33.6541
ENSMUSG00000036820	0.31329	6.03038	12.5637	0.0335503	amidohydrolase domain containing 2 [Source:MGI Symbol;Acc:MGI:2443978]	Amdhd2	71.3661	64.1816	75.1926	55.4714	61.6075	52.4609
ENSMUSG00000019433	0.312669	6.24964	18.1416	0.0218413	GIPC PDZ domain containing family, member 1 [Source:MGI Symbol;Acc:MGI:1926252]	Gipc1	80.2869	78.0054	88.0545	67.3581	69.5569	61.3693
ENSMUSG00000040128	-0.353388	4.9324	3.33263	0.116704	proline-rich nuclear receptor coactivator 1 [Source:MGI Symbol;Acc:MGI:1917838]	Pnrc1	19.8239	27.6475	27.7025	39.6224	28.8164	27.7152
ENSMUSG00000032551	-0.353323	3.95561	5.27051	0.264877	RIKEN cDNA 1110059G10 gene [Source:MGI Symbol;Acc:MGI:1913452]	1110059G10Rik	9.91196	12.8363	12.8619	17.8301	13.9114	13.8576
ENSMUSG00000030095	0.310398	7.16755	6.2688	0.0454911	transmembrane protein 43 [Source:MGI Symbol;Acc:MGI:1921372]	Tmem43	180.398	147.124	143.46	108.962	134.145	136.596
ENSMUSG00000000355	-0.352754	4.29584	3.22383	0.204486	malignant T cell amplified sequence 1 [Source:MGI Symbol;Acc:MGI:1916245]	Mcts1	12.8856	18.7608	14.8406	23.7735	15.8987	19.7966
ENSMUSG00000028793	-0.35263	5.4234	4.872	0.0684899	ring finger protein 19B [Source:MGI Symbol;Acc:MGI:1922484]	Rnf19b	30.7271	34.5593	42.5432	52.4997	46.7025	38.6033
ENSMUSG00000016256	0.309342	5.94406	8.25331	0.0418277	cathepsin Z [Source:MGI Symbol;Acc:MGI:1891190]	Ctsz	69.3837	58.2572	70.2457	50.5186	59.6202	49.4914
ENSMUSG00000040385	0.309181	9.3373	7.62643	0.03209	protein phosphatase 1, catalytic subunit, alpha isoform [Source:MGI Symbol;Acc:MGI:103016]	Ppp1ca	807.825	650.703	682.669	505.186	627.006	595.876
ENSMUSG00000026377	-0.351272	6.42059	2.23422	0.184614	nucleolar protein interacting with the FHA domain of MKI67 [Source:MGI Symbol;Acc:MGI:1915199]	Nifk	55.507	90.8417	74.2032	118.867	73.5316	89.0845
ENSMUSG00000038365	-0.350774	5.75856	2.66182	0.15289	F-box protein 25 [Source:MGI Symbol;Acc:MGI:1914072]	Fbxo25	38.6567	58.2572	40.5644	67.3581	44.7151	63.349
ENSMUSG00000020189	-0.350755	5.51997	5.47917	0.0569176	oxysterol binding protein-like 8 [Source:MGI Symbol;Acc:MGI:2443807]	Osbpl8	32.7095	39.4964	43.5325	57.4525	47.6961	42.5626
ENSMUSG00000028232	-0.35053	4.08752	4.75003	0.244316	transmembrane protein 68 [Source:MGI Symbol;Acc:MGI:1919348]	Tmem68	10.9032	13.8237	14.8406	19.8112	15.8987	14.8474
ENSMUSG00000047554	-0.35053	4.08752	1.83833	0.244316	transmembrane protein 41B [Source:MGI Symbol;Acc:MGI:1289225]	Tmem41b	9.91196	16.786	12.8619	21.7923	12.9177	15.8372
ENSMUSG00000029066	0.308362	6.43169	7.14048	0.0361881	mitochondrial ribosomal protein L20 [Source:MGI Symbol;Acc:MGI:2137221]	Mrpl20	91.1901	83.9298	104.874	76.2732	83.4683	66.3184
ENSMUSG00000034379	-0.350118	3.12894	6.71113	0.430474	WD repeat domain 5B [Source:MGI Symbol;Acc:MGI:1916794]	Wdr5b	4.95598	6.91187	5.93626	7.92448	6.95569	7.91862
ENSMUSG00000046138	-0.350118	3.12894	2.40217	0.430474	RIKEN cDNA 9930021J03 gene [Source:MGI Symbol;Acc:MGI:2444398]	9930021J03Rik	4.95598	5.92446	6.92563	9.90561	6.95569	5.93897
ENSMUSG00000039531	-0.350118	3.12894	4.64212	0.430474	zinc finger with UFM1-specific peptidase domain [Source:MGI Symbol;Acc:MGI:1919830]	Zufsp	5.94718	6.91187	4.94688	6.93392	6.95569	8.90845
ENSMUSG00000048997	-0.350118	3.12894	15.8591	0.430474	ataxin 7-like 2 [Source:MGI Symbol;Acc:MGI:1919772]	Atxn7l2	5.94718	5.92446	5.93626	7.92448	6.95569	7.91862
ENSMUSG00000025330	-0.350118	3.12894	4.5992	0.430474	peptidyl arginine deiminase, type IV [Source:MGI Symbol;Acc:MGI:1338898]	Padi4	6.93837	5.92446	4.94688	6.93392	6.95569	8.90845
ENSMUSG00000015869	0.308094	6.55582	45.2371	0.0117912	phosphoribosyl pyrophosphate synthetase-associated protein 1 [Source:MGI Symbol;Acc:MGI:1915013]	Prpsap1	99.1196	102.691	103.884	85.1882	81.4809	80.176
ENSMUSG00000020592	0.307957	7.49376	12.5834	0.0117002	syndecan 1 [Source:MGI Symbol;Acc:MGI:1349162]	Sdc1	217.072	190.57	184.024	144.622	163.956	169.261
ENSMUSG00000028576	-0.349696	5.28978	5.19557	0.0691424	intraflagellar transport 74 [Source:MGI Symbol;Acc:MGI:1914944]	Ift74	29.7359	29.6223	38.5857	45.5658	44.7151	34.644
ENSMUSG00000069844	-0.34955	5.12895	14.2178	0.0866124	SCO1 cytochrome c oxidase assembly protein [Source:MGI Symbol;Acc:MGI:106362]	Sco1	27.7535	27.6475	31.66	38.6319	38.7531	33.6541
ENSMUSG00000058498	-0.34876	4.49906	11.7395	0.175521	ring finger protein 207 [Source:MGI Symbol;Acc:MGI:2684989]	Rnf207	17.8415	19.7482	16.8194	23.7735	20.8671	24.7457
ENSMUSG00000029563	-0.34876	4.49905	2.86798	0.175521	forkhead box P2 [Source:MGI Symbol;Acc:MGI:2148705]	Foxp2	15.8591	22.7104	15.83	25.7546	17.8861	25.7355
ENSMUSG00000041961	-0.347366	3.84397	11.9831	0.294027	zinc and ring finger 3 [Source:MGI Symbol;Acc:MGI:3039616]	Znrf3	9.91196	11.8489	10.8831	14.8584	12.9177	13.8576
ENSMUSG00000025899	-0.347366	3.84397	3.81341	0.294027	alkB homolog 8, tRNA methyltransferase [Source:MGI Symbol;Acc:MGI:1914917]	Alkbh8	8.92077	11.8489	11.8725	16.8395	11.924	12.8678
ENSMUSG00000028850	-0.347366	3.84397	11.4182	0.294027	G patch domain containing 3 [Source:MGI Symbol;Acc:MGI:2442492]	Gpatch3	11.8944	9.8741	10.8831	12.8773	14.905	13.8576
ENSMUSG00000038880	0.306513	6.02674	6.10439	0.0475967	mitochondrial ribosomal protein S34 [Source:MGI Symbol;Acc:MGI:1930188]	Mrps34	75.3309	60.232	74.2032	52.4997	64.5885	52.4609
ENSMUSG00000036199	0.306391	7.70707	11.6599	0.0137851	NADH dehydrogenase (ubiquinone) 1 alpha subcomplex, 13 [Source:MGI Symbol;Acc:MGI:1914434]	Ndufa13	252.755	217.23	216.673	166.414	194.759	194.006
ENSMUSG00000074165	-0.345638	3.35522	12.9021	0.391571	zinc finger protein 788 [Source:MGI Symbol;Acc:MGI:1914857]	Zfp788	6.93837	6.91187	7.91501	8.91505	9.9367	8.90845
ENSMUSG00000021302	-0.345638	3.35522	4.33177	0.391571	geranylgeranyl diphosphate synthase 1 [Source:MGI Symbol;Acc:MGI:1341724]	Ggps1	5.94718	7.89928	7.91501	10.8962	7.94936	8.90845
ENSMUSG00000044573	-0.345638	3.35522	2.569	0.391571	acid phosphatase 1, soluble [Source:MGI Symbol;Acc:MGI:87881]	Acp1	5.94718	8.88669	6.92563	10.8962	6.95569	9.89828
ENSMUSG00000039768	0.306098	7.10837	33.3905	0.00237182	DnaJ heat shock protein family (Hsp40) member C11 [Source:MGI Symbol;Acc:MGI:2443386]	Dnajc11	156.609	143.174	151.375	116.886	127.19	120.759
ENSMUSG00000040532	0.305817	6.12893	11.2302	0.0316295	abhydrolase domain containing 11 [Source:MGI Symbol;Acc:MGI:1916008]	Abhd11	82.2693	74.0557	69.2563	55.4714	61.6075	65.3286
ENSMUSG00000015733	-0.345137	7.1032	5.78753	0.0520399	capping protein (actin filament) muscle Z-line, alpha 2 [Source:MGI Symbol;Acc:MGI:106222]	Capza2	100.111	129.351	128.619	178.301	138.12	138.576
ENSMUSG00000029009	-0.344976	3.98599	11.4198	0.270573	5,10-methylenetetrahydrofolate reductase [Source:MGI Symbol;Acc:MGI:106639]	Mthfr	10.9032	12.8363	12.8619	16.8395	14.905	14.8474
ENSMUSG00000065979	0.305433	6.51995	14.3072	0.0136909	calcineurin-like phosphoesterase domain containing 1 [Source:MGI Symbol;Acc:MGI:2443300]	Cpped1	107.049	98.741	92.012	74.292	80.4873	86.115
ENSMUSG00000052707	-0.34369	5.6725	5.88392	0.0506311	trinucleotide repeat containing 6a [Source:MGI Symbol;Acc:MGI:2385292]	Tnrc6a	38.6567	40.4838	50.4582	60.4242	57.6328	46.5219
ENSMUSG00000055053	0.304696	6.96134	16.655	0.00621585	nuclear factor I/C [Source:MGI Symbol;Acc:MGI:109591]	Nfic	146.697	130.338	129.608	101.037	114.272	113.83
ENSMUSG00000005804	-0.343296	4.51996	6.87715	0.178917	biogenesis of lysosomal organelles complex-1, subunit 6, pallidin [Source:MGI Symbol;Acc:MGI:1927580]	Bloc1s6	15.8591	19.7482	19.7875	26.7451	21.8607	21.7762
ENSMUSG00000005148	-0.343045	4.11527	20.8603	0.24939	Kruppel-like factor 5 [Source:MGI Symbol;Acc:MGI:1338056]	Klf5	13.8767	12.8363	13.8513	16.8395	17.8861	16.8271
ENSMUSG00000027860	-0.343032	5.55078	36.7606	0.0500688	vang-like 1 (van gogh, Drosophila) [Source:MGI Symbol;Acc:MGI:2159344]	Vangl1	40.6391	38.509	39.575	48.5375	51.6708	50.4812
ENSMUSG00000035885	0.30343	9.09792	70.9487	0.000136727	cytochrome c oxidase subunit VIIIa [Source:MGI Symbol;Acc:MGI:105959]	Cox8a	612.559	608.244	588.679	481.412	484.911	499.863
ENSMUSG00000055991	-0.342509	3.55077	4.78591	0.357447	zinc finger with KRAB and SCAN domains 5 [Source:MGI Symbol;Acc:MGI:107533]	Zkscan5	7.92957	7.89928	9.89376	11.8867	11.924	8.90845
ENSMUSG00000037408	-0.342083	4.61048	9.26475	0.165903	cyclin M4 [Source:MGI Symbol;Acc:MGI:2151060]	Cnnm4	21.8063	19.7482	17.8088	22.7829	24.8417	27.7152
ENSMUSG00000042834	-0.342083	4.61047	2.66457	0.165903	neuronal regeneration related protein [Source:MGI Symbol;Acc:MGI:99444]	Nrep	18.8327	24.6852	15.83	25.7546	19.8734	29.6948
ENSMUSG00000031756	-0.341964	5.21481	1.71558	0.23724	centromere protein N [Source:MGI Symbol;Acc:MGI:1919405]	Cenpn	22.7975	30.6097	39.575	50.5186	37.7595	29.6948
ENSMUSG00000061991	-0.341106	7.17747	2.93417	0.136543	histone cluster 1, H2af [Source:MGI Symbol;Acc:MGI:2448309]	Hist1h2af	100.111	127.376	150.385	196.131	153.025	129.667
ENSMUSG00000023940	-0.34102	4.69565	9.69487	0.153956	shugoshin-like 1 (S. pombe) [Source:MGI Symbol;Acc:MGI:1919665]	Sgol1	21.8063	22.7104	18.7981	25.7546	24.8417	29.6948
ENSMUSG00000052085	-0.340558	2.61048	1.20225	0.544628	dedicator of cytokinesis 8 [Source:MGI Symbol;Acc:MGI:1921396]	Dock8	4.95598	2.96223	2.96813	2.97168	5.96202	4.94914
ENSMUSG00000044468	-0.340558	2.61048	5.19509	0.544628	family with sequence similarity 46, member C [Source:MGI Symbol;Acc:MGI:1921895]	Fam46c	2.97359	3.94964	3.9575	4.9528	3.97468	4.94914
ENSMUSG00000035443	0.300432	6.30488	10.0836	0.0246103	thymocyte nuclear protein 1 [Source:MGI Symbol;Acc:MGI:1925112]	Thyn1	76.3221	88.8669	90.0332	76.2732	65.5822	65.3286
ENSMUSG00000071180	-0.3402	3.72295	2.79163	0.32724	small integral membrane protein 15 [Source:MGI Symbol;Acc:MGI:1922866]	Smim15	7.92957	10.8615	10.8831	15.849	10.9304	10.8881
ENSMUSG00000046567	-0.3402	3.72296	4.86019	0.32724	RIKEN cDNA 4930430F08 gene [Source:MGI Symbol;Acc:MGI:1921197]	4930430F08Rik	11.8944	8.88669	8.90438	10.8962	13.9114	12.8678
ENSMUSG00000069272	0.300329	6.49377	20.2009	0.0163064	histone cluster 1, H2ae [Source:MGI Symbol;Acc:MGI:2448290]	Hist1h2ae	97.1372	91.8291	102.895	79.2448	83.4683	74.2371
ENSMUSG00000026578	-0.339499	5.42893	4.03188	0.0904391	coiled-coil domain containing 181 [Source:MGI Symbol;Acc:MGI:1922145]	Ccdc181	29.7359	39.4964	39.575	55.4714	40.7405	41.5728
ENSMUSG00000031337	-0.338981	4.44541	1.36297	0.286449	X-linked myotubular myopathy gene 1 [Source:MGI Symbol;Acc:MGI:1099452]	Mtm1	14.8679	23.6978	13.8513	24.764	14.905	26.7253
ENSMUSG00000039308	-0.338425	3.87676	5.10424	0.300305	N-deacetylase/N-sulfotransferase (heparan glucosaminyl) 2 [Source:MGI Symbol;Acc:MGI:97040]	Ndst2	9.91196	10.8615	12.8619	15.849	14.905	11.8779
ENSMUSG00000090523	-0.338425	3.87675	2.46317	0.300305	glycophorin C [Source:MGI Symbol;Acc:MGI:1098566]	Gypc	8.92077	13.8237	10.8831	16.8395	10.9304	14.8474
ENSMUSG00000020381	-0.338425	3.87676	8.12748	0.300305	RIKEN cDNA 3010026O09 gene [Source:MGI Symbol;Acc:MGI:1915317]	3010026O09Rik	11.8944	11.8489	9.89376	13.8678	12.9177	15.8372
ENSMUSG00000038400	-0.338002	4.54058	11.6762	0.182279	prostate transmembrane protein, androgen induced 1 [Source:MGI Symbol;Acc:MGI:1929600]	Pmepa1	17.8415	17.7734	20.7769	24.764	24.8417	21.7762
ENSMUSG00000034709	-0.337821	4.99349	17.9428	0.11493	protein phosphatase 1, regulatory subunit 21 [Source:MGI Symbol;Acc:MGI:1921075]	Ppp1r21	27.7535	26.6601	24.7344	31.6979	32.7911	35.6338
ENSMUSG00000020153	0.300212	7.85839	23.9892	0.0025638	NADH dehydrogenase (ubiquinone) Fe-S protein 7 [Source:MGI Symbol;Acc:MGI:1922656]	Ndufs7	270.597	243.89	247.344	193.159	214.633	210.833
ENSMUSG00000031540	-0.337612	5.84812	1.8562	0.221029	K(lysine) acetyltransferase 6A [Source:MGI Symbol;Acc:MGI:2442415]	Kat6a	37.6655	46.4083	63.3201	77.2637	62.6012	46.5219
ENSMUSG00000026020	-0.337532	7.77606	5.07519	0.0642896	NOP58 ribonucleoprotein [Source:MGI Symbol;Acc:MGI:1933184]	Nop58	159.583	211.306	204.801	287.263	216.62	223.701
ENSMUSG00000039210	-0.337019	4.01573	2.8113	0.276146	G patch domain containing 2 [Source:MGI Symbol;Acc:MGI:1915019]	Gpatch2	13.8767	13.8237	9.89376	13.8678	13.9114	19.7966
ENSMUSG00000020326	0.299275	6.81465	13.5709	0.00991068	cyclin G1 [Source:MGI Symbol;Acc:MGI:102890]	Ccng1	126.873	111.577	127.629	95.0938	108.31	94.0336
ENSMUSG00000026023	-0.336495	2.92458	2.33523	0.48847	cyclin-dependent kinase 15 [Source:MGI Symbol;Acc:MGI:3583944]	Cdk15	3.96479	4.93705	5.93626	7.92448	5.96202	4.94914
ENSMUSG00000040022	-0.336495	2.92458	4.63691	0.48847	RAB11 family interacting protein 2 (class I) [Source:MGI Symbol;Acc:MGI:1922248]	Rab11fip2	4.95598	5.92446	3.9575	5.94336	5.96202	6.92879
ENSMUSG00000036596	-0.336495	2.92459	4.52481	0.48847	carboxypeptidase Z [Source:MGI Symbol;Acc:MGI:88487]	Cpz	4.95598	3.94964	5.93626	5.94336	6.95569	5.93897
ENSMUSG00000072872	-0.336495	2.92458	2.35719	0.48847	RING1 and YY1 binding protein [Source:MGI Symbol;Acc:MGI:1929059]	Rybp	3.96479	5.92446	4.94688	7.92448	4.96835	5.93897
ENSMUSG00000085793	-0.336495	2.92459	2.99113	0.48847	lin-52 homolog (C. elegans) [Source:MGI Symbol;Acc:MGI:3045391]	Lin52	5.94718	4.93705	3.9575	4.9528	6.95569	6.92879
ENSMUSG00000006423	-0.336495	2.92459	1.06562	0.48847	RIKEN cDNA C330007P06 gene [Source:MGI Symbol;Acc:MGI:1924894]	C330007P06Rik	6.93837	3.94964	3.9575	3.96224	7.94936	6.92879
ENSMUSG00000041396	-0.336495	2.92458	3.05387	0.48847	methyltransferase like 18 [Source:MGI Symbol;Acc:MGI:1917212]	Mettl18	4.95598	5.92446	3.9575	6.93392	4.96835	6.92879
ENSMUSG00000051147	-0.336495	2.92458	2.35584	0.48847	N-acetyltransferase 2 (arylamine N-acetyltransferase) [Source:MGI Symbol;Acc:MGI:109201]	Nat2	4.95598	5.92446	3.9575	5.94336	4.96835	7.91862
ENSMUSG00000071547	0.298399	7.53801	17.53	0.00551155	5'-nucleotidase domain containing 2 [Source:MGI Symbol;Acc:MGI:1917271]	Nt5dc2	217.072	189.583	201.833	153.537	175.88	165.301
ENSMUSG00000022309	-0.336146	5.18238	5.58467	0.0928243	angiopoietin 1 [Source:MGI Symbol;Acc:MGI:108448]	Angpt1	25.7711	31.5971	33.6388	44.5752	35.7721	34.644
ENSMUSG00000021906	-0.336146	5.18238	16.9516	0.0928243	oxidoreductase NAD-binding domain containing 1 [Source:MGI Symbol;Acc:MGI:1916953]	Oxnad1	29.7359	32.5845	28.6919	38.6319	35.7721	40.5829
ENSMUSG00000006471	-0.335877	4.1425	11.0138	0.254371	NADPH dependent diflavin oxidoreductase 1 [Source:MGI Symbol;Acc:MGI:1926047]	Ndor1	13.8767	12.8363	14.8406	17.8301	18.8797	15.8372
ENSMUSG00000035671	-0.335877	4.14249	5.97098	0.254371	zinc finger SWIM-type containing 4 [Source:MGI Symbol;Acc:MGI:2443726]	Zswim4	13.8767	15.7986	11.8725	16.8395	15.8987	19.7966
ENSMUSG00000099517	0.296772	7.75195	8.1397	0.0284092	histone cluster 1, H3g [Source:MGI Symbol;Acc:MGI:2145541]	Hist1h3g	264.649	223.155	218.652	169.386	200.721	204.894
ENSMUSG00000027952	0.296225	6.61047	11.3903	0.0144861	phosphomevalonate kinase [Source:MGI Symbol;Acc:MGI:1915853]	Pmvk	115.97	98.741	101.906	78.2543	91.4176	88.0947
ENSMUSG00000035296	-0.335251	5.29584	18.2836	0.0806784	sarcoglycan, gamma (dystrophin-associated glycoprotein) [Source:MGI Symbol;Acc:MGI:1346524]	Sgcg	30.7271	34.5593	33.6388	44.5752	39.7468	40.5829
ENSMUSG00000010175	-0.335251	5.29583	3.80408	0.0980159	prospero homeobox 1 [Source:MGI Symbol;Acc:MGI:97772]	Prox1	28.7447	39.4964	30.6707	47.5469	33.7848	43.5524
ENSMUSG00000021391	-0.334621	4.94018	9.98072	0.125684	centromere protein P [Source:MGI Symbol;Acc:MGI:1913586]	Cenpp	22.7975	26.6601	26.7132	35.6602	29.8101	30.6847
ENSMUSG00000025580	0.296223	7.51085	19.12	0.00448095	eukaryotic translation initiation factor 4A3 [Source:MGI Symbol;Acc:MGI:1923731]	Eif4a3	208.151	184.646	203.811	154.527	173.892	157.383
ENSMUSG00000021392	-0.334144	5.00836	5.77419	0.116906	nucleolar protein 8 [Source:MGI Symbol;Acc:MGI:1918180]	Nol8	22.7975	27.6475	29.6813	38.6319	32.7911	29.6948
ENSMUSG00000031461	-0.334144	5.00835	3.82037	0.116906	myomesin 2 [Source:MGI Symbol;Acc:MGI:1328358]	Myom2	21.8063	29.6223	28.6919	40.613	29.8101	30.6847
ENSMUSG00000102752	-0.334136	4.3668	2.4825	0.216775	predicted gene 7694 [Source:MGI Symbol;Acc:MGI:3649135]	Gm7694	16.8503	19.7482	12.8619	19.8112	16.8924	25.7355
ENSMUSG00000051379	-0.334105	3.18238	6.92396	0.441269	fibronectin leucine rich transmembrane protein 3 [Source:MGI Symbol;Acc:MGI:1918686]	Flrt3	5.94718	5.92446	6.92563	7.92448	8.94303	6.92879
ENSMUSG00000078185	-0.334105	3.18238	3.24159	0.441269	choroideremia-like [Source:MGI Symbol;Acc:MGI:101913]	Chml	4.95598	7.89928	5.93626	8.91505	6.95569	7.91862
ENSMUSG00000015656	-0.334105	3.18238	2.76719	0.441269	heat shock protein 8 [Source:MGI Symbol;Acc:MGI:105384]	Hspa8	4.95598	6.91187	6.92563	9.90561	6.95569	6.92879
ENSMUSG00000024544	-0.334105	3.18238	2.76719	0.441269	low density lipoprotein receptor class A domain containing 4 [Source:MGI Symbol;Acc:MGI:1277150]	Ldlrad4	4.95598	6.91187	6.92563	9.90561	6.95569	6.92879
ENSMUSG00000005950	-0.334105	3.18239	6.8951	0.441269	purinergic receptor P2X, ligand-gated ion channel, 5 [Source:MGI Symbol;Acc:MGI:2137026]	P2rx5	6.93837	5.92446	5.93626	6.93392	8.94303	7.91862
ENSMUSG00000020390	-0.333898	5.82728	5.85675	0.051023	ubiquitin-conjugating enzyme E2B [Source:MGI Symbol;Acc:MGI:102944]	Ube2b	46.5862	56.2823	42.5432	62.4053	52.6645	68.2981
ENSMUSG00000059325	0.296056	7.53672	16.8729	0.00602978	HOP homeobox [Source:MGI Symbol;Acc:MGI:1916782]	Hopx	219.054	192.545	195.896	152.546	172.899	169.261
ENSMUSG00000051412	-0.333317	5.13573	17.6322	0.101307	vesicle-associated membrane protein 7 [Source:MGI Symbol;Acc:MGI:1096399]	Vamp7	28.7447	31.5971	27.7025	37.6413	34.7784	38.6033
ENSMUSG00000004610	0.29486	7.0945	10.6521	0.0166658	electron transferring flavoprotein, beta polypeptide [Source:MGI Symbol;Acc:MGI:106098]	Etfb	163.547	143.174	138.513	108.962	125.202	128.678
ENSMUSG00000057672	0.293459	6.44812	13.1042	0.0209014	protein kinase N1 [Source:MGI Symbol;Acc:MGI:108022]	Pkn1	96.146	99.7284	86.0757	74.292	72.5379	83.1455
ENSMUSG00000042408	-0.33253	3.40102	7.9879	0.400717	zinc finger, MYM-type 6 [Source:MGI Symbol;Acc:MGI:106505]	Zmym6	7.92957	7.89928	6.92563	8.91505	8.94303	10.8881
ENSMUSG00000017713	-0.33253	3.40102	2.56541	0.400717	threonine aldolase 1 [Source:MGI Symbol;Acc:MGI:1919026]	Tha1	8.92077	7.89928	5.93626	7.92448	8.94303	11.8779
ENSMUSG00000047213	-0.33206	6.65368	3.30792	0.117814	YTH domain family 3 [Source:MGI Symbol;Acc:MGI:1918850]	Ythdf3	69.3837	97.7536	94.9801	134.716	96.386	98.9828
ENSMUSG00000027466	0.292006	6.22437	9.67562	0.033731	RanBP-type and C3HC4-type zinc finger containing 1 [Source:MGI Symbol;Acc:MGI:1344372]	Rbck1	85.2429	82.9424	72.2244	61.4148	62.6012	72.2574
ENSMUSG00000039156	-0.331511	4.81042	3.58979	0.148066	stromal interaction molecule 2 [Source:MGI Symbol;Acc:MGI:2151156]	Stim2	18.8327	23.6978	26.7132	34.6696	27.8228	24.7457
ENSMUSG00000047832	-0.331511	4.81041	14.7671	0.148066	cell division cycle associated 4 [Source:MGI Symbol;Acc:MGI:1919213]	Cdca4	21.8063	24.6852	22.7556	30.7074	26.8291	29.6948
ENSMUSG00000030020	-0.331414	3.59085	5.96859	0.365348	prickle planar cell polarity protein 2 [Source:MGI Symbol;Acc:MGI:1925144]	Prickle2	7.92957	8.88669	9.89376	12.8773	10.9304	9.89828
ENSMUSG00000042680	-0.331414	3.59085	6.053	0.365348	GRB2 associated regulator of MAPK1 subtype 1 [Source:MGI Symbol;Acc:MGI:2685790]	Garem1	7.92957	9.8741	8.90438	12.8773	9.9367	10.8881
ENSMUSG00000037876	-0.331097	5.55585	13.2382	0.0580785	jumonji domain containing 1C [Source:MGI Symbol;Acc:MGI:1918614]	Jmjd1c	37.6655	38.509	43.5325	52.4997	52.6645	45.5321
ENSMUSG00000028703	0.291346	7.07696	12.0513	0.0128455	leucine rich repeat containing 41 [Source:MGI Symbol;Acc:MGI:2441984]	Lrrc41	137.776	141.2	160.279	126.792	123.215	108.881
ENSMUSG00000073481	0.290178	6.40944	8.47883	0.0262821	mitochondrial amidoxime reducing component 2 [Source:MGI Symbol;Acc:MGI:1914497]	Marc2	100.111	91.8291	82.1182	68.3487	73.5316	82.1557
ENSMUSG00000026915	-0.330899	5.60071	25.8507	0.0542573	spermatid perinuclear RNA binding protein [Source:MGI Symbol;Acc:MGI:104626]	Strbp	40.6391	39.4964	43.5325	52.4997	53.6582	49.4914
ENSMUSG00000058152	-0.330583	3.75858	2.60884	0.334158	chondroitin sulfate synthase 3 [Source:MGI Symbol;Acc:MGI:1926173]	Chsy3	10.9032	7.89928	11.8725	11.8867	15.8987	10.8881
ENSMUSG00000015222	-0.330583	3.75857	2.46479	0.334158	microtubule-associated protein 2 [Source:MGI Symbol;Acc:MGI:97175]	Map2	8.92077	12.8363	8.90438	13.8678	9.9367	14.8474
ENSMUSG00000026519	0.287758	6.52771	12.8274	0.0198205	transmembrane protein 63a [Source:MGI Symbol;Acc:MGI:2384789]	Tmem63a	107.049	98.741	92.012	75.2826	81.4809	87.1048
ENSMUSG00000033411	-0.329939	3.90882	17.2908	0.306423	CTD (carboxy-terminal domain, RNA polymerase II, polypeptide A) small phosphatase like 2 [Source:MGI Symbol;Acc:MGI:1196405]	Ctdspl2	11.8944	10.8615	11.8725	13.8678	14.905	14.8474
ENSMUSG00000025575	-0.329425	4.04488	9.64449	0.281598	calcium activated nucleotidase 1 [Source:MGI Symbol;Acc:MGI:1923275]	Cant1	12.8856	11.8489	13.8513	15.849	17.8861	14.8474
ENSMUSG00000026696	-0.329425	4.04488	12.1348	0.281598	vesicle-associated membrane protein 4 [Source:MGI Symbol;Acc:MGI:1858730]	Vamp4	11.8944	13.8237	12.8619	16.8395	14.905	16.8271
ENSMUSG00000031925	-0.329007	4.1692	1.20058	0.314406	mastermind like 2 (Drosophila) [Source:MGI Symbol;Acc:MGI:2389460]	Maml2	9.91196	18.7608	13.8513	23.7735	12.9177	16.8271
ENSMUSG00000037820	0.287231	10.1404	6.08252	0.0478866	transglutaminase 2, C polypeptide [Source:MGI Symbol;Acc:MGI:98731]	Tgm2	1412.45	1166.13	1136.79	882.589	1068.19	1093.76
ENSMUSG00000015478	-0.328365	4.38972	7.54164	0.220762	ring finger protein 5 [Source:MGI Symbol;Acc:MGI:1860076]	Rnf5	17.8415	14.8111	17.8088	19.8112	23.8481	19.7966
ENSMUSG00000047115	-0.328365	4.38971	8.22605	0.220762	family with sequence similarity 221, member A [Source:MGI Symbol;Acc:MGI:2442161]	Fam221a	18.8327	15.7986	15.83	18.8207	22.8544	21.7762
ENSMUSG00000002319	0.285607	7.1391	14.8909	0.00804529	importin 4 [Source:MGI Symbol;Acc:MGI:1923001]	Ipo4	150.662	143.174	164.236	126.792	133.152	115.81
ENSMUSG00000072623	-0.328113	4.48847	1.04928	0.344413	zinc finger protein 9 [Source:MGI Symbol;Acc:MGI:99210]	Zfp9	13.8767	25.6726	14.8406	27.7357	14.905	25.7355
ENSMUSG00000014778	0.285381	6.19217	17.7591	0.0401935	formin homology 2 domain containing 1 [Source:MGI Symbol;Acc:MGI:2679008]	Fhod1	81.2781	79.9802	73.2138	61.4148	62.6012	68.2981
ENSMUSG00000074794	-0.327537	4.74976	16.0892	0.162276	arrestin domain containing 3 [Source:MGI Symbol;Acc:MGI:2145242]	Arrdc3	22.7975	20.7356	22.7556	26.7451	29.8101	26.7253
ENSMUSG00000044149	-0.327255	4.90087	5.98963	0.139847	NF-kappaB repressing factor [Source:MGI Symbol;Acc:MGI:1924536]	Nkrf	22.7975	28.6349	22.7556	32.6885	26.8291	33.6541
ENSMUSG00000051989	-0.327027	5.03765	8.8441	0.12084	small integral membrane protein 11 [Source:MGI Symbol;Acc:MGI:1916186]	Smim11	24.7799	29.6223	27.7025	38.6319	31.7974	32.6643
ENSMUSG00000031119	0.28503	7.94114	23.6521	0.0026565	glypican 4 [Source:MGI Symbol;Acc:MGI:104902]	Gpc4	277.535	251.789	274.057	211.98	233.512	213.803
ENSMUSG00000028672	0.28402	6.51997	7.88489	0.0301616	3-hydroxy-3-methylglutaryl-Coenzyme A lyase [Source:MGI Symbol;Acc:MGI:96158]	Hmgcl	108.04	88.8669	98.9376	73.3015	89.4303	80.176
ENSMUSG00000018377	-0.326032	5.89688	4.82293	0.0695598	vascular endothelial zinc finger 1 [Source:MGI Symbol;Acc:MGI:1313291]	Vezf1	42.6214	56.2823	54.4157	75.2826	57.6328	59.3897
ENSMUSG00000022800	-0.324383	6.38688	4.44751	0.0785457	forty-two-three domain containing 1 [Source:MGI Symbol;Acc:MGI:1917955]	Fyttd1	62.4454	70.1061	85.0863	104.009	92.4113	76.2167
ENSMUSG00000027176	-0.324373	6.36103	5.34789	0.0591819	cleavage stimulation factor, 3' pre-RNA, subunit 3 [Source:MGI Symbol;Acc:MGI:1351825]	Cstf3	74.3397	78.9928	60.3519	84.1977	79.4936	103.932
ENSMUSG00000024914	0.283748	6.64656	8.66315	0.0252148	Dr1 associated protein 1 (negative cofactor 2 alpha) [Source:MGI Symbol;Acc:MGI:1913806]	Drap1	117.952	107.628	97.9482	80.2354	88.4366	97.0031
ENSMUSG00000035898	-0.324244	6.04127	5.78842	0.0520266	ubiquitin-like modifier activating enzyme 6 [Source:MGI Symbol;Acc:MGI:1913894]	Uba6	48.5686	59.2446	62.3307	82.2165	67.5695	63.349
ENSMUSG00000035027	0.281225	6.75195	27.8087	0.0137206	mitogen-activated protein kinase kinase 2 [Source:MGI Symbol;Acc:MGI:1346867]	Map2k2	121.917	113.552	112.789	91.1316	97.3796	97.9929
ENSMUSG00000024290	-0.324197	5.94018	4.54357	0.076103	Rho-associated coiled-coil containing protein kinase 1 [Source:MGI Symbol;Acc:MGI:107927]	Rock1	44.6038	61.2194	52.4369	76.2732	56.6392	65.3286
ENSMUSG00000028763	0.281082	11.4791	19.8109	0.00411275	perlecan (heparan sulfate proteoglycan 2) [Source:MGI Symbol;Acc:MGI:96257]	Hspg2	3279.87	2934.58	3174.91	2454.61	2742.53	2530
ENSMUSG00000058729	-0.32387	5.39539	32.3222	0.0801595	lin-9 homolog (C. elegans) [Source:MGI Symbol;Acc:MGI:1919818]	Lin9	36.6743	34.5593	35.6175	43.5847	45.7088	44.5422
ENSMUSG00000032342	-0.323831	5.34355	29.8227	0.0859696	mitochondrial tRNA translation optimization 1 [Source:MGI Symbol;Acc:MGI:1915541]	Mto1	33.7007	33.5719	35.6175	43.5847	43.7215	41.5728
ENSMUSG00000056692	-0.32328	4.76735	11.0132	0.165009	DNA segment, Chr 17, Wayne State University 92, expressed [Source:MGI Symbol;Acc:MGI:106281]	D17Wsu92e	22.7975	20.7356	23.745	27.7357	30.8038	25.7355
ENSMUSG00000052852	-0.32328	4.76735	5.49349	0.165009	receptor accessory protein 1 [Source:MGI Symbol;Acc:MGI:1098827]	Reep1	24.7799	22.7104	19.7875	24.764	26.8291	32.6643
ENSMUSG00000019813	-0.323181	4.68642	5.96006	0.177991	centrosomal protein 57-like 1 [Source:MGI Symbol;Acc:MGI:1915511]	Cep57l1	20.8151	23.6978	18.7981	26.7451	22.8544	29.6948
ENSMUSG00000038256	-0.32294	4.50955	15.7413	0.207679	B cell CLL/lymphoma 9 [Source:MGI Symbol;Acc:MGI:1924828]	Bcl9	17.8415	17.7734	19.7875	23.7735	23.8481	21.7762
ENSMUSG00000020937	0.279455	6.34646	13.5907	0.0338107	phospholipase C, delta 3 [Source:MGI Symbol;Acc:MGI:107451]	Plcd3	93.1725	81.955	86.0757	66.3676	76.5126	72.2574
ENSMUSG00000061315	-0.322641	7.3523	3.78749	0.0986009	nascent polypeptide-associated complex alpha polypeptide [Source:MGI Symbol;Acc:MGI:106095]	Naca	116.961	160.948	152.364	215.942	157	165.301
ENSMUSG00000031502	0.278827	9.33947	29.8729	0.00146237	collagen, type IV, alpha 1 [Source:MGI Symbol;Acc:MGI:88454]	Col4a1	727.538	673.413	723.234	567.591	613.094	570.141
ENSMUSG00000049536	-0.322415	4.19544	1.77995	0.26406	transcription elongation factor A (SII)-like 1 [Source:MGI Symbol;Acc:MGI:2385317]	Tceal1	10.9032	16.786	15.83	23.7735	14.905	15.8372
ENSMUSG00000064367	-0.322415	4.19544	19.9601	0.26406	mitochondrially encoded NADH dehydrogenase 5 [Source:MGI Symbol;Acc:MGI:102496]	mt-Nd5	13.8767	14.8111	14.8406	18.8207	17.8861	17.8169
ENSMUSG00000032459	-0.322348	5.91277	5.57517	0.0553353	mitochondrial ribosomal protein S22 [Source:MGI Symbol;Acc:MGI:1928137]	Mrps22	44.6038	57.2698	53.4263	75.2826	57.6328	61.3693
ENSMUSG00000031099	-0.321873	3.94018	1.588	0.312387	SWI/SNF related, matrix associated, actin dependent regulator of chromatin, subfamily a, member 1 [Source:MGI Symbol;Acc:MGI:1935127]	Smarca1	8.92077	11.8489	14.8406	18.8207	14.905	10.8881
ENSMUSG00000021643	-0.321873	3.94018	1.39295	0.312387	small EDRK-rich factor 1 [Source:MGI Symbol;Acc:MGI:1337114]	Serf1	8.92077	14.8111	11.8725	19.8112	10.9304	13.8576
ENSMUSG00000019774	-0.321873	3.94018	11.2649	0.312387	mitochondrial translational release factor 1-like [Source:MGI Symbol;Acc:MGI:1918830]	Mtrf1l	11.8944	12.8363	10.8831	14.8584	13.9114	15.8372
ENSMUSG00000034252	-0.321702	5.59578	6.64309	0.061719	SUMO/sentrin specific peptidase 6 [Source:MGI Symbol;Acc:MGI:1922075]	Senp6	35.6831	42.4586	45.5113	58.4431	49.6835	46.5219
ENSMUSG00000063894	-0.321501	3.79334	15.2045	0.340869	zinc finger with KRAB and SCAN domains 8 [Source:MGI Symbol;Acc:MGI:1913815]	Zkscan8	10.9032	9.8741	10.8831	12.8773	13.9114	12.8678
ENSMUSG00000103585	-0.321237	5.40665	13.0058	0.0813849	protocadherin gamma subfamily B, 4 [Source:MGI Symbol;Acc:MGI:1935173]	Pcdhgb4	38.6567	36.5342	32.6494	42.5941	43.7215	48.5016
ENSMUSG00000028601	0.277932	6.87674	16.3611	0.0109228	enoyl Coenzyme A hydratase domain containing 2 [Source:MGI Symbol;Acc:MGI:1289238]	Echdc2	135.794	123.426	120.704	97.0749	107.316	108.881
ENSMUSG00000031897	0.276165	7.0249	8.0871	0.0287596	proteasome (prosome, macropain) subunit, beta type 10 [Source:MGI Symbol;Acc:MGI:1096380]	Psmb10	156.609	134.288	130.598	104.009	120.234	123.728
ENSMUSG00000003429	0.275396	8.51474	14.9963	0.00791726	ribosomal protein S11 [Source:MGI Symbol;Acc:MGI:1351329]	Rps11	430.179	385.09	379.92	304.102	339.835	343.47
ENSMUSG00000057101	-0.320391	3.44542	6.33517	0.409459	zinc finger protein 180 [Source:MGI Symbol;Acc:MGI:1923701]	Zfp180	7.92957	6.91187	8.90438	9.90561	10.9304	8.90845
ENSMUSG00000040212	-0.320391	3.44542	21.3573	0.409459	epithelial membrane protein 3 [Source:MGI Symbol;Acc:MGI:1098729]	Emp3	7.92957	7.89928	7.91501	9.90561	9.9367	9.89828
ENSMUSG00000079108	-0.320391	3.44541	1.25568	0.409459	signal recognition particle 54B [Source:MGI Symbol;Acc:MGI:3714357]	Srp54b	5.94718	10.8615	6.92563	11.8867	6.95569	10.8881
ENSMUSG00000025759	-0.320391	3.44542	6.42831	0.409459	major facilitator superfamily domain containing 8 [Source:MGI Symbol;Acc:MGI:1919425]	Mfsd8	8.92077	7.89928	6.92563	8.91505	9.9367	10.8881
ENSMUSG00000048450	-0.319509	3.23391	3.88876	0.451463	msh homeobox 1 [Source:MGI Symbol;Acc:MGI:97168]	Msx1	5.94718	5.92446	7.91501	8.91505	8.94303	6.92879
ENSMUSG00000039270	-0.319509	3.23392	9.70281	0.451463	multiple EGF-like-domains 9 [Source:MGI Symbol;Acc:MGI:1918264]	Megf9	6.93837	5.92446	6.92563	7.92448	8.94303	7.91862
ENSMUSG00000095432	-0.319509	3.23391	1.39592	0.451463	zinc finger protein 748 [Source:MGI Symbol;Acc:MGI:1916455]	Zfp748	4.95598	8.88669	5.93626	9.90561	5.96202	8.90845
ENSMUSG00000035790	-0.319509	3.23391	3.99364	0.451463	centrosomal protein 19 [Source:MGI Symbol;Acc:MGI:1914244]	Cep19	5.94718	7.89928	5.93626	8.91505	6.95569	8.90845
ENSMUSG00000038239	-0.318781	4.7048	5.88252	0.180948	histidine rich calcium binding protein [Source:MGI Symbol;Acc:MGI:96226]	Hrc	20.8151	24.6852	18.7981	26.7451	23.8481	29.6948
ENSMUSG00000024287	-0.318412	5.3668	3.12289	0.126609	THO complex 1 [Source:MGI Symbol;Acc:MGI:1919668]	Thoc1	28.7447	41.4712	34.6282	51.5092	35.7721	43.5524
ENSMUSG00000022475	-0.318383	4.6202	5.9008	0.195397	histone deacetylase 7 [Source:MGI Symbol;Acc:MGI:1891835]	Hdac7	17.8415	19.7482	22.7556	27.7357	25.8354	21.7762
ENSMUSG00000033417	-0.318383	4.6202	6.49074	0.195397	CDK2 associated, cullin domain 1 [Source:MGI Symbol;Acc:MGI:1926082]	Cacul1	22.7975	18.7608	18.7981	21.7923	26.8291	26.7253
ENSMUSG00000024776	-0.318194	2.98599	7.53792	0.50064	STAM binding protein like 1 [Source:MGI Symbol;Acc:MGI:1923880]	Stambpl1	4.95598	4.93705	5.93626	6.93392	6.95569	5.93897
ENSMUSG00000026027	-0.318194	2.98599	7.53792	0.50064	STE20-related kinase adaptor beta [Source:MGI Symbol;Acc:MGI:2144047]	Stradb	4.95598	4.93705	5.93626	6.93392	6.95569	5.93897
ENSMUSG00000057069	-0.318194	2.98599	1.2312	0.50064	ERO1-like beta (S. cerevisiae) [Source:MGI Symbol;Acc:MGI:1914725]	Ero1lb	3.96479	4.93705	6.92563	8.91505	5.96202	4.94914
ENSMUSG00000019194	-0.318194	2.98598	1.63232	0.50064	sodium channel, voltage-gated, type I, beta [Source:MGI Symbol;Acc:MGI:98247]	Scn1b	3.96479	6.91187	4.94688	7.92448	4.96835	6.92879
ENSMUSG00000073131	-0.318194	2.98598	1.63232	0.50064	VMA21 vacuolar H+-ATPase homolog (S. cerevisiae) [Source:MGI Symbol;Acc:MGI:1914298]	Vma21	3.96479	6.91187	4.94688	7.92448	4.96835	6.92879
ENSMUSG00000031723	-0.318194	2.98598	7.78563	0.50064	thioredoxin-like 4B [Source:MGI Symbol;Acc:MGI:2443724]	Txnl4b	4.95598	5.92446	4.94688	6.93392	5.96202	6.92879
ENSMUSG00000057265	-0.318194	2.98598	7.78563	0.50064	basal body orientation factor 1 [Source:MGI Symbol;Acc:MGI:1920123]	Bbof1	4.95598	5.92446	4.94688	6.93392	5.96202	6.92879
ENSMUSG00000025137	0.272767	7.23707	10.9639	0.0156951	phosphate cytidylyltransferase 2, ethanolamine [Source:MGI Symbol;Acc:MGI:1915921]	Pcyt2	178.415	155.023	155.332	122.83	141.101	140.556
ENSMUSG00000031865	0.272702	8.34866	5.9573	0.049593	dynactin 1 [Source:MGI Symbol;Acc:MGI:107745]	Dctn1	402.426	329.795	331.441	256.555	313.006	310.806
ENSMUSG00000040511	-0.316911	5.08051	13.5876	0.126686	poliovirus receptor [Source:MGI Symbol;Acc:MGI:107741]	Pvr	30.7271	27.6475	26.7132	32.6885	36.7658	36.6236
ENSMUSG00000059586	-0.316563	5.86455	3.72397	0.100887	NSE2/MMS21 homolog, SMC5-SMC6 complex SUMO ligase [Source:MGI Symbol;Acc:MGI:1915751]	Nsmce2	41.6302	51.3453	57.3838	74.292	59.6202	53.4507
ENSMUSG00000032815	0.272067	6.5533	14.8666	0.0261975	Fanconi anemia, complementation group A [Source:MGI Symbol;Acc:MGI:1341823]	Fanca	97.1372	96.7661	107.842	86.1788	86.4493	77.2066
ENSMUSG00000021180	-0.316523	5.01574	23.9701	0.136295	ribosomal protein S6 kinase, polypeptide 5 [Source:MGI Symbol;Acc:MGI:1920336]	Rps6ka5	25.7711	27.6475	27.7025	34.6696	32.7911	33.6541
ENSMUSG00000055932	0.271736	7.06636	9.23058	0.0222718	fat mass and obesity associated [Source:MGI Symbol;Acc:MGI:1347093]	Fto	158.591	134.288	140.491	107.971	128.183	122.739
ENSMUSG00000036461	-0.316095	4.94793	6.73253	0.146726	E74-like factor 1 [Source:MGI Symbol;Acc:MGI:107180]	Elf1	28.7447	22.7104	25.7238	28.7263	35.7721	31.6745
ENSMUSG00000002732	-0.316086	4.22121	1.59129	0.268773	FK506 binding protein 7 [Source:MGI Symbol;Acc:MGI:1336879]	Fkbp7	12.8856	11.8489	19.7875	19.8112	21.8607	13.8576
ENSMUSG00000028647	-0.316086	4.22121	10.7485	0.268773	MYC binding protein [Source:MGI Symbol;Acc:MGI:1891750]	Mycbp	13.8767	14.8111	15.83	19.8112	18.8797	16.8271
ENSMUSG00000038342	-0.316086	4.2212	11.0218	0.268773	MLX interacting protein [Source:MGI Symbol;Acc:MGI:2141183]	Mlxip	14.8679	15.7986	13.8513	18.8207	16.8924	19.7966
ENSMUSG00000003198	-0.316027	2.68643	2.04581	0.559722	zinc finger protein 959 [Source:MGI Symbol;Acc:MGI:2385058]	Zfp959	2.97359	3.94964	4.94688	5.94336	4.96835	3.95931
ENSMUSG00000015377	-0.316027	2.68643	2.04581	0.559722	DENN/MADD domain containing 6B [Source:MGI Symbol;Acc:MGI:1916690]	Dennd6b	2.97359	3.94964	4.94688	5.94336	4.96835	3.95931
ENSMUSG00000007570	-0.316027	2.68643	18.4867	0.559722	Fanconi anemia, complementation group E [Source:MGI Symbol;Acc:MGI:1920025]	Fance	3.96479	3.94964	3.9575	4.9528	4.96835	4.94914
ENSMUSG00000036552	-0.316027	2.68643	18.4867	0.559722	ER membrane associated RNA degradation [Source:MGI Symbol;Acc:MGI:1917317]	Ermard	3.96479	3.94964	3.9575	4.9528	4.96835	4.94914
ENSMUSG00000041703	-0.316027	2.68643	18.4867	0.559722	zinc finger protein of the cerebellum 5 [Source:MGI Symbol;Acc:MGI:1929518]	Zic5	3.96479	3.94964	3.9575	4.9528	4.96835	4.94914
ENSMUSG00000047793	-0.316027	2.68643	18.4867	0.559722	sushi, nidogen and EGF-like domains 1 [Source:MGI Symbol;Acc:MGI:3045960]	Sned1	3.96479	3.94964	3.9575	4.9528	4.96835	4.94914
ENSMUSG00000053821	-0.316027	2.68643	18.4867	0.559722	predicted gene 9922 [Source:MGI Symbol;Acc:MGI:3642123]	Gm9922	3.96479	3.94964	3.9575	4.9528	4.96835	4.94914
ENSMUSG00000079559	-0.316027	2.68643	18.4867	0.559722	predicted gene 684 [Source:MGI Symbol;Acc:MGI:2685530]	Gm684	3.96479	3.94964	3.9575	4.9528	4.96835	4.94914
ENSMUSG00000011751	-0.316027	2.68643	2.01394	0.559722	spectrin beta, non-erythrocytic 4 [Source:MGI Symbol;Acc:MGI:1890574]	Sptbn4	4.95598	2.96223	3.9575	3.96224	5.96202	4.94914
ENSMUSG00000040412	-0.316027	2.68643	2.01394	0.559722	RIKEN cDNA 5330417C22 gene [Source:MGI Symbol;Acc:MGI:1923930]	5330417C22Rik	4.95598	2.96223	3.9575	3.96224	5.96202	4.94914
ENSMUSG00000032228	-0.315584	5.70935	2.9796	0.134056	transcription factor 12 [Source:MGI Symbol;Acc:MGI:101877]	Tcf12	36.6743	53.3201	44.5219	66.3676	45.7088	55.4303
ENSMUSG00000032235	-0.315233	4.10146	1.69627	0.292158	interactor of little elongation complex ELL subunit 2 [Source:MGI Symbol;Acc:MGI:2135947]	Ice2	9.91196	14.8111	15.83	21.7923	14.905	13.8576
ENSMUSG00000021276	-0.314501	4.72296	5.04185	0.18388	cyclin-dependent kinase 2 interacting protein [Source:MGI Symbol;Acc:MGI:1914486]	Cinp	21.8063	18.7608	24.7344	26.7451	30.8038	23.7559
ENSMUSG00000061731	-0.314197	3.97088	4.97099	0.318204	exostoses (multiple) 1 [Source:MGI Symbol;Acc:MGI:894663]	Ext1	10.9032	11.8489	13.8513	16.8395	15.8987	12.8678
ENSMUSG00000040653	-0.31417	5.15592	6.22406	0.119614	protein phosphatase 1, regulatory (inhibitor) subunit 14c [Source:MGI Symbol;Acc:MGI:1923392]	Ppp1r14c	29.7359	26.6601	33.6388	37.6413	41.7341	32.6643
ENSMUSG00000021290	-0.313787	7.034	2.08217	0.198147	RIKEN cDNA 2010107E04 gene [Source:MGI Symbol;Acc:MGI:1917507]	2010107E04Rik	88.2165	136.263	120.704	181.273	117.253	130.657
ENSMUSG00000024668	-0.313678	5.09451	26.0091	0.128621	succinate dehydrogenase complex assembly factor 2 [Source:MGI Symbol;Acc:MGI:1913322]	Sdhaf2	27.7535	29.6223	28.6919	36.6507	34.7784	35.6338
ENSMUSG00000031167	-0.313537	5.71843	3.7863	0.0986434	RNA binding motif protein 3 [Source:MGI Symbol;Acc:MGI:1099460]	Rbm3	43.6126	53.3201	38.5857	57.4525	46.7025	64.3388
ENSMUSG00000034480	-0.313173	5.38971	14.0881	0.0912488	diaphanous related formin 2 [Source:MGI Symbol;Acc:MGI:1858500]	Diaph2	32.7095	37.5216	36.6069	47.5469	41.7341	43.5524
ENSMUSG00000021236	-0.313173	5.38972	13.0476	0.0912488	ectonucleoside triphosphate diphosphohydrolase 5 [Source:MGI Symbol;Acc:MGI:1321385]	Entpd5	38.6567	34.5593	33.6388	40.613	45.7088	46.5219
ENSMUSG00000061455	-0.313074	4.55077	6.85038	0.21471	syntaxin 17 [Source:MGI Symbol;Acc:MGI:1914977]	Stx17	16.8503	19.7482	20.7769	26.7451	22.8544	21.7762
ENSMUSG00000029998	0.270093	6.80829	11.2823	0.0157436	prenylcysteine oxidase 1 [Source:MGI Symbol;Acc:MGI:1914131]	Pcyox1	129.847	111.577	119.714	92.1221	107.316	99.9726
ENSMUSG00000029122	-0.312911	3.82729	8.49396	0.347383	Ellis van Creveld gene syndrome [Source:MGI Symbol;Acc:MGI:1890596]	Evc	10.9032	9.8741	11.8725	12.8773	14.905	12.8678
ENSMUSG00000038481	-0.312911	3.82729	18.4137	0.347383	cyclin-dependent kinase 19 [Source:MGI Symbol;Acc:MGI:1925584]	Cdk19	10.9032	10.8615	10.8831	13.8678	12.9177	13.8576
ENSMUSG00000007458	-0.312236	5.28368	12.8544	0.105148	mannose-6-phosphate receptor, cation dependent [Source:MGI Symbol;Acc:MGI:96904]	M6pr	34.6919	30.6097	33.6388	38.6319	44.7151	39.5931
ENSMUSG00000032411	-0.312201	4.4563	4.55484	0.232402	transcription factor Dp 2 [Source:MGI Symbol;Acc:MGI:107167]	Tfdp2	15.8591	20.7356	16.8194	24.764	18.8797	22.766
ENSMUSG00000021215	-0.312201	4.4563	4.55314	0.232402	neuroepithelial cell transforming gene 1 [Source:MGI Symbol;Acc:MGI:1927138]	Net1	16.8503	20.7356	15.83	22.7829	18.8797	24.7457
ENSMUSG00000035601	-0.311274	3.66781	10.2304	0.380313	tRNA methyltransferase 10B [Source:MGI Symbol;Acc:MGI:1917184]	Trmt10b	9.91196	9.8741	8.90438	10.8962	11.924	12.8678
ENSMUSG00000018923	-0.31119	4.35523	2.13895	0.251881	mediator complex subunit 11 [Source:MGI Symbol;Acc:MGI:1913422]	Med11	20.8151	14.8111	13.8513	15.849	21.8607	23.7559
ENSMUSG00000056515	-0.311136	5.16921	7.04149	0.121397	RAB31, member RAS oncogene family [Source:MGI Symbol;Acc:MGI:1914603]	Rab31	26.7623	30.6097	33.6388	41.6035	37.7595	33.6541
ENSMUSG00000019261	0.269685	6.48317	14.5529	0.0315585	microtubule-associated protein 1S [Source:MGI Symbol;Acc:MGI:2443304]	Map1s	101.102	88.8669	96.9588	75.2826	84.4619	78.1964
ENSMUSG00000022265	-0.310511	5.10839	2.751	0.147251	progressive ankylosis [Source:MGI Symbol;Acc:MGI:3045421]	Ank	24.7799	26.6601	35.6175	40.613	38.7531	28.705
ENSMUSG00000021952	-0.310359	5.81465	15.7387	0.0511801	exportin 4 [Source:MGI Symbol;Acc:MGI:1888526]	Xpo4	46.5862	52.3327	46.5007	62.4053	55.6455	62.3591
ENSMUSG00000021003	0.269025	6.42892	14.3252	0.0353803	galactosylceramidase [Source:MGI Symbol;Acc:MGI:95636]	Galc	99.1196	88.8669	88.0545	71.3204	78.4999	79.1862
ENSMUSG00000004462	-0.310003	4.24651	7.24393	0.273402	TBCC domain containing 1 [Source:MGI Symbol;Acc:MGI:1917823]	Tbccd1	14.8679	16.786	13.8513	18.8207	16.8924	20.7864
ENSMUSG00000041329	-0.309118	3.48849	11.94	0.417827	ATPase, Na+/K+ transporting, beta 2 polypeptide [Source:MGI Symbol;Acc:MGI:88109]	Atp1b2	7.92957	8.88669	7.91501	9.90561	9.9367	10.8881
ENSMUSG00000032470	-0.309118	3.48849	7.29725	0.417827	muscle and microspikes RAS [Source:MGI Symbol;Acc:MGI:1100856]	Mras	8.92077	7.89928	7.91501	8.91505	10.9304	10.8881
ENSMUSG00000046688	-0.309118	3.48849	7.29725	0.417827	TRAF-interacting protein with forkhead-associated domain [Source:MGI Symbol;Acc:MGI:2182965]	Tifa	8.92077	7.89928	7.91501	8.91505	10.9304	10.8881
ENSMUSG00000002968	0.26889	6.7453	33.0115	0.0187042	mediator complex subunit 25 [Source:MGI Symbol;Acc:MGI:1922863]	Med25	116.961	117.502	110.81	94.1033	93.405	98.9828
ENSMUSG00000031617	-0.308591	4.12895	4.18655	0.297272	transmembrane protein 184C [Source:MGI Symbol;Acc:MGI:2384562]	Tmem184c	11.8944	13.8237	15.83	19.8112	16.8924	14.8474
ENSMUSG00000025959	-0.308591	4.12895	19.6502	0.297272	Kruppel-like factor 7 (ubiquitous) [Source:MGI Symbol;Acc:MGI:1935151]	Klf7	13.8767	13.8237	13.8513	16.8395	17.8861	16.8271
ENSMUSG00000047030	-0.308591	4.12895	20.1103	0.297272	spermatogenesis associated 2 [Source:MGI Symbol;Acc:MGI:2146885]	Spata2	13.8767	13.8237	13.8513	16.8395	16.8924	17.8169
ENSMUSG00000030779	-0.308469	7.07521	5.26794	0.0606207	retinoblastoma binding protein 6 [Source:MGI Symbol;Acc:MGI:894835]	Rbbp6	102.093	134.288	119.714	168.395	128.183	144.515
ENSMUSG00000029781	0.267611	7.21319	24.6059	0.00580706	FK506 binding protein 9 [Source:MGI Symbol;Acc:MGI:1350921]	Fkbp9	162.556	152.061	165.226	130.754	140.107	127.688
ENSMUSG00000038612	0.267579	7.32879	10.1012	0.0185864	myeloid cell leukemia sequence 1 [Source:MGI Symbol;Acc:MGI:101769]	Mcl1	190.31	164.897	165.226	130.754	151.038	150.454
ENSMUSG00000030722	-0.307472	5.36103	24.9373	0.100764	nuclear factor of activated T cells, cytoplasmic, calcineurin dependent 2 interacting protein [Source:MGI Symbol;Acc:MGI:1329015]	Nfatc2ip	35.6831	33.5719	35.6175	41.6035	44.7151	43.5524
ENSMUSG00000031577	-0.307166	4.47783	1.47873	0.268748	TELO2 interacting protein 2 [Source:MGI Symbol;Acc:MGI:2384576]	Tti2	16.8503	23.6978	13.8513	22.7829	16.8924	27.7152
ENSMUSG00000040242	-0.306883	4.00094	11.6137	0.323878	FGFR1 oncogene partner 2 [Source:MGI Symbol;Acc:MGI:1914779]	Fgfr1op2	11.8944	13.8237	11.8725	15.849	14.905	15.8372
ENSMUSG00000046311	-0.306883	4.00094	12.1698	0.323878	zinc finger protein 62 [Source:MGI Symbol;Acc:MGI:99662]	Zfp62	11.8944	12.8363	12.8619	16.8395	14.905	14.8474
ENSMUSG00000041926	0.267516	7.53543	60.7077	0.00202211	arginyl aminopeptidase (aminopeptidase B) [Source:MGI Symbol;Acc:MGI:2384902]	Rnpep	202.204	196.495	202.822	165.424	169.918	164.311
ENSMUSG00000047036	-0.306585	5.05924	1.94432	0.211676	zinc finger protein 445 [Source:MGI Symbol;Acc:MGI:2143340]	Zfp445	21.8063	28.6349	33.6388	43.5847	32.7911	27.7152
ENSMUSG00000034647	-0.306585	5.05924	4.19403	0.142546	ankyrin repeat domain 12 [Source:MGI Symbol;Acc:MGI:1914357]	Ankrd12	23.7887	28.6349	31.66	40.613	32.7911	30.6847
ENSMUSG00000003269	0.267047	6.40944	20.6577	0.0380567	cytohesin 2 [Source:MGI Symbol;Acc:MGI:1334255]	Cyth2	94.1637	91.8291	86.0757	72.3109	74.5252	79.1862
ENSMUSG00000040370	-0.30615	3.28367	3.23862	0.461111	LYR motif containing 5 [Source:MGI Symbol;Acc:MGI:1914886]	Lyrm5	6.93837	5.92446	7.91501	8.91505	9.9367	6.92879
ENSMUSG00000040978	-0.30615	3.28367	1.44744	0.461111	predicted gene 11992 [Source:MGI Symbol;Acc:MGI:3651127]	Gm11992	4.95598	6.91187	8.90438	10.8962	7.94936	6.92879
ENSMUSG00000022774	-0.306047	5.25278	24.9756	0.116242	nuclear cap binding protein subunit 2 [Source:MGI Symbol;Acc:MGI:1915342]	Ncbp2	31.7183	31.5971	33.6388	40.613	40.7405	38.6033
ENSMUSG00000040694	0.265127	6.3581	24.0561	0.0431437	apolipoprotein B mRNA editing enzyme, catalytic polypeptide 2 [Source:MGI Symbol;Acc:MGI:1343178]	Apobec2	84.2517	90.8417	87.0651	75.2826	69.5569	73.2472
ENSMUSG00000024142	-0.30568	4.99349	5.17602	0.153493	MTOR associated protein, LST8 homolog (S. cerevisiae) [Source:MGI Symbol;Acc:MGI:1929514]	Mlst8	30.7271	23.6978	25.7238	28.7263	36.7658	33.6541
ENSMUSG00000003299	0.264698	7.66897	12.0075	0.0129464	mitochondrial ribosomal protein L4 [Source:MGI Symbol;Acc:MGI:2137210]	Mrpl4	238.878	207.356	213.705	168.395	193.766	187.077
ENSMUSG00000034173	-0.304774	3.86046	1.95733	0.353709	zinc finger, BED type containing 5 [Source:MGI Symbol;Acc:MGI:1919220]	Zbed5	10.9032	8.88669	13.8513	13.8678	16.8924	10.8881
ENSMUSG00000040913	-0.304774	3.86046	4.25127	0.353709	F-box and WD-40 domain protein 4 [Source:MGI Symbol;Acc:MGI:1354698]	Fbxw4	12.8856	10.8615	9.89376	11.8867	13.9114	15.8372
ENSMUSG00000020362	-0.304681	4.92459	5.61278	0.165399	CCR4-NOT transcription complex, subunit 6 [Source:MGI Symbol;Acc:MGI:2144529]	Cnot6	21.8063	26.6601	27.7025	35.6602	29.8101	28.705
ENSMUSG00000020593	0.261161	7.06454	7.82632	0.0305847	lipin 1 [Source:MGI Symbol;Acc:MGI:1891340]	Lpin1	128.856	153.048	149.396	132.735	112.285	114.82
ENSMUSG00000039470	-0.304153	4.27139	8.5853	0.277947	zinc finger, DHHC domain containing 2 [Source:MGI Symbol;Acc:MGI:1923452]	Zdhhc2	13.8767	16.786	15.83	20.8018	17.8861	18.8067
ENSMUSG00000024613	0.260668	6.58588	6.31018	0.044981	treacle ribosome biogenesis factor 1 [Source:MGI Symbol;Acc:MGI:892003]	Tcof1	94.1637	98.741	114.768	92.1221	88.4366	76.2167
ENSMUSG00000026037	-0.303954	5.48318	16.3525	0.0899499	origin recognition complex, subunit 2 [Source:MGI Symbol;Acc:MGI:1328306]	Orc2	35.6831	39.4964	39.575	50.5186	45.7088	45.5321
ENSMUSG00000014498	0.259919	7.57594	19.6323	0.00420395	ankyrin repeat domain 52 [Source:MGI Symbol;Acc:MGI:2444029]	Ankrd52	218.063	197.482	201.833	161.461	178.861	175.199
ENSMUSG00000033671	-0.303131	5.5859	7.27931	0.0792909	centrosomal protein 350 [Source:MGI Symbol;Acc:MGI:1921331]	Cep350	36.6743	44.4334	42.5432	57.4525	46.7025	48.5016
ENSMUSG00000055723	-0.302949	6.06992	5.38581	0.0585155	related RAS viral (r-ras) oncogene 2 [Source:MGI Symbol;Acc:MGI:1914172]	Rras2	51.5422	57.2698	66.2882	81.226	72.5379	62.3591
ENSMUSG00000024067	-0.302419	5.68181	15.1922	0.0699783	dpy-30, histone methyltransferase complex regulatory subunit [Source:MGI Symbol;Acc:MGI:1913560]	Dpy30	42.6214	42.4586	47.49	56.462	56.6392	50.4812
ENSMUSG00000033454	-0.302419	5.68181	20.7362	0.0699783	zinc finger and BTB domain containing 1 [Source:MGI Symbol;Acc:MGI:2442326]	Zbtb1	46.5862	42.4586	43.5325	51.5092	56.6392	55.4303
ENSMUSG00000039103	-0.302395	8.54632	2.62383	0.155384	nexilin [Source:MGI Symbol;Acc:MGI:1916060]	Nexn	263.658	357.442	377.942	506.176	373.62	352.379
ENSMUSG00000018166	-0.302333	4.77606	3.27726	0.192521	erb-b2 receptor tyrosine kinase 3 [Source:MGI Symbol;Acc:MGI:95411]	Erbb3	22.7975	26.6601	18.7981	27.7357	23.8481	32.6643
ENSMUSG00000020170	-0.302292	4.49906	9.52243	0.239904	fibroblast growth factor receptor substrate 2 [Source:MGI Symbol;Acc:MGI:1100860]	Frs2	19.8239	16.786	18.7981	21.7923	24.8417	21.7762
ENSMUSG00000014813	-0.302106	3.7048	5.78982	0.387408	stanniocalcin 1 [Source:MGI Symbol;Acc:MGI:109131]	Stc1	8.92077	10.8615	9.89376	13.8678	10.9304	11.8779
ENSMUSG00000037921	-0.301804	3.04488	4.65678	0.511963	DEAD (Asp-Glu-Ala-Asp) box polypeptide 60 [Source:MGI Symbol;Acc:MGI:2384570]	Ddx60	5.94718	4.93705	5.93626	6.93392	7.94936	5.93897
ENSMUSG00000049119	-0.301804	3.04488	0.955304	0.511963	family with sequence similarity 110, member B [Source:MGI Symbol;Acc:MGI:1916593]	Fam110b	3.96479	7.89928	4.94688	8.91505	4.96835	6.92879
ENSMUSG00000073633	-0.301804	3.04488	4.669	0.511963	F-box protein 36 [Source:MGI Symbol;Acc:MGI:1289192]	Fbxo36	5.94718	4.93705	5.93626	5.94336	7.94936	6.92879
ENSMUSG00000007379	-0.301804	3.04488	9.85634	0.511963	DENN/MADD domain containing 2C [Source:MGI Symbol;Acc:MGI:3036254]	Dennd2c	5.94718	5.92446	4.94688	6.93392	6.95569	6.92879
ENSMUSG00000004698	-0.301804	3.04488	3.01596	0.511963	histone deacetylase 9 [Source:MGI Symbol;Acc:MGI:1931221]	Hdac9	4.95598	6.91187	4.94688	6.93392	5.96202	7.91862
ENSMUSG00000002297	-0.301528	5.33175	2.4762	0.165637	DBF4 zinc finger [Source:MGI Symbol;Acc:MGI:1351328]	Dbf4	27.7535	40.4838	34.6282	51.5092	34.7784	40.5829
ENSMUSG00000029213	-0.30081	5.44543	15.1066	0.0978191	COMM domain containing 8 [Source:MGI Symbol;Acc:MGI:1343485]	Commd8	35.6831	36.5342	39.575	48.5375	46.7025	42.5626
ENSMUSG00000073678	-0.299906	4.03038	0.882647	0.383031	post-GPI attachment to proteins 1 [Source:MGI Symbol;Acc:MGI:2443342]	Pgap1	8.92077	12.8363	16.8194	21.7923	14.905	10.8881
ENSMUSG00000030717	-0.299906	4.03038	5.18172	0.329415	nuclear protein transcription regulator 1 [Source:MGI Symbol;Acc:MGI:1891834]	Nupr1	11.8944	11.8489	14.8406	16.8395	16.8924	13.8576
ENSMUSG00000021111	-0.299724	5.97845	4.54911	0.0759654	poly (A) polymerase alpha [Source:MGI Symbol;Acc:MGI:109301]	Papola	46.5862	61.2194	56.3944	78.2543	59.6202	64.3388
ENSMUSG00000039046	-0.299369	4.61048	9.83357	0.224952	USP6 N-terminal like [Source:MGI Symbol;Acc:MGI:2138893]	Usp6nl	18.8327	19.7482	21.7663	26.7451	24.8417	22.766
ENSMUSG00000020184	0.259834	7.03219	11.5559	0.01405	transformed mouse 3T3 cell double minute 2 [Source:MGI Symbol;Acc:MGI:96952]	Mdm2	152.644	135.275	133.566	107.971	121.228	122.739
ENSMUSG00000030681	0.258941	7.51083	38.1327	0.00304872	major vault protein [Source:MGI Symbol;Acc:MGI:1925638]	Mvp	202.204	197.482	189.96	159.48	163.956	169.261
ENSMUSG00000025283	-0.298621	3.53031	1.60437	0.425844	spermidine/spermine N1-acetyl transferase 1 [Source:MGI Symbol;Acc:MGI:98233]	Sat1	7.92957	6.91187	10.8831	10.8962	12.9177	7.91862
ENSMUSG00000021023	-0.298621	3.5303	1.14118	0.425844	RIKEN cDNA 1110008L16 gene [Source:MGI Symbol;Acc:MGI:1913382]	1110008L16Rik	5.94718	10.8615	8.90438	13.8678	7.94936	9.89828
ENSMUSG00000037818	-0.298621	3.5303	1.64142	0.425844	abhydrolase domain containing 18 [Source:MGI Symbol;Acc:MGI:1915468]	Abhd18	7.92957	10.8615	6.92563	10.8962	7.94936	12.8678
ENSMUSG00000000901	-0.298523	4.29585	3.09471	0.282412	matrix metallopeptidase 11 [Source:MGI Symbol;Acc:MGI:97008]	Mmp11	14.8679	13.8237	18.7981	20.8018	21.8607	15.8372
ENSMUSG00000032534	-0.298523	4.29585	10.0925	0.282412	centrosomal protein 63 [Source:MGI Symbol;Acc:MGI:2158560]	Cep63	15.8591	14.8111	16.8194	19.8112	20.8671	17.8169
ENSMUSG00000028195	0.258028	6.67945	12.1945	0.0274527	cysteine rich protein 61 [Source:MGI Symbol;Acc:MGI:88613]	Cyr61	110.023	116.514	101.906	91.1316	85.4556	97.9929
ENSMUSG00000052911	0.257473	8.44475	6.45294	0.043279	laminin, beta 2 [Source:MGI Symbol;Acc:MGI:99916]	Lamb2	406.391	334.732	390.804	291.225	352.753	302.887
ENSMUSG00000018425	-0.298077	5.78904	8.07526	0.063435	DEAH (Asp-Glu-Ala-His) box polypeptide 40 [Source:MGI Symbol;Acc:MGI:1914737]	Dhx40	46.5862	53.3201	43.5325	60.4242	52.6645	63.349
ENSMUSG00000028885	0.257398	7.46037	8.47558	0.0263015	sphingomyelin phosphodiesterase, acid-like 3B [Source:MGI Symbol;Acc:MGI:1916022]	Smpdl3b	206.169	172.797	189.96	145.612	172.899	157.383
ENSMUSG00000029647	-0.297935	5.28977	8.14679	0.121143	PAN3 poly(A) specific ribonuclease subunit [Source:MGI Symbol;Acc:MGI:1919837]	Pan3	30.7271	32.5845	36.6069	44.5752	41.7341	36.6236
ENSMUSG00000054823	-0.297832	6.05924	5.62491	0.0545387	Wolf-Hirschhorn syndrome candidate 1-like 1 (human) [Source:MGI Symbol;Acc:MGI:2142581]	Whsc1l1	50.551	59.2446	64.3094	81.226	69.5569	63.349
ENSMUSG00000006732	-0.297804	4.95561	7.98961	0.170207	methyltransferase like 1 [Source:MGI Symbol;Acc:MGI:1339986]	Mettl1	25.7711	28.6349	23.745	32.6885	28.8164	34.644
ENSMUSG00000029598	0.256607	6.43445	6.10444	0.0475959	phospholipase B domain containing 2 [Source:MGI Symbol;Acc:MGI:1919022]	Plbd2	92.1813	82.9424	100.916	76.2732	85.4556	69.2879
ENSMUSG00000028643	-0.297055	3.89288	5.09166	0.359856	small vasohibin binding protein [Source:MGI Symbol;Acc:MGI:1916466]	Svbp	11.8944	9.8741	12.8619	13.8678	15.8987	12.8678
ENSMUSG00000043572	-0.297055	3.89288	7.83162	0.359856	prolyl-tRNA synthetase (mitochondrial)(putative) [Source:MGI Symbol;Acc:MGI:2386296]	Pars2	10.9032	12.8363	10.8831	14.8584	12.9177	14.8474
ENSMUSG00000030393	-0.297055	3.89288	14.272	0.359856	zinc finger protein interacting with K protein 1 [Source:MGI Symbol;Acc:MGI:108070]	Zik1	11.8944	11.8489	10.8831	13.8678	13.9114	14.8474
ENSMUSG00000024697	-0.297055	3.89288	2.19471	0.359856	guanine nucleotide binding protein, alpha 14 [Source:MGI Symbol;Acc:MGI:95769]	Gna14	13.8767	10.8615	9.89376	10.8962	14.905	16.8271
ENSMUSG00000031578	-0.297022	5.83567	23.8855	0.0600157	MAK16 homolog [Source:MGI Symbol;Acc:MGI:1915170]	Mak16	51.5422	47.3957	49.4688	58.4431	63.5949	60.3795
ENSMUSG00000061360	-0.296534	5.9935	5.7749	0.0522283	PHD finger protein 5A [Source:MGI Symbol;Acc:MGI:2156864]	Phf5a	63.4366	53.3201	49.4688	59.4336	70.5506	74.2371
ENSMUSG00000041958	0.255918	6.83772	46.7205	0.0207539	phosphatidylinositol glycan anchor biosynthesis, class S [Source:MGI Symbol;Acc:MGI:2687325]	Pigs	122.908	120.464	123.672	102.028	104.335	100.962
ENSMUSG00000014867	0.255848	7.75416	17.0724	0.00586583	surfeit gene 4 [Source:MGI Symbol;Acc:MGI:98445]	Surf4	233.922	219.205	245.365	194.15	206.683	184.108
ENSMUSG00000001018	-0.296124	4.18239	13.5106	0.307186	SNAP-associated protein [Source:MGI Symbol;Acc:MGI:1333745]	Snapin	14.8679	13.8237	14.8406	17.8301	18.8797	16.8271
ENSMUSG00000067931	-0.296124	4.18238	2.49316	0.307186	zinc finger protein 948 [Source:MGI Symbol;Acc:MGI:3040683]	Zfp948	11.8944	16.786	14.8406	21.7923	14.905	16.8271
ENSMUSG00000053279	-0.296124	4.18238	0.869956	0.386256	aldehyde dehydrogenase family 1, subfamily A1 [Source:MGI Symbol;Acc:MGI:1353450]	Aldh1a1	18.8327	14.8111	9.89376	12.8773	15.8987	24.7457
ENSMUSG00000040586	-0.295938	5.03765	6.79477	0.160144	oral-facial-digital syndrome 1 gene homolog (human) [Source:MGI Symbol;Acc:MGI:1350328]	Ofd1	24.7799	27.6475	30.6707	37.6413	33.7848	30.6847
ENSMUSG00000021733	-0.295603	5.17582	16.2536	0.140064	solute carrier family 4, sodium bicarbonate cotransporter, member 7 [Source:MGI Symbol;Acc:MGI:2443878]	Slc4a7	31.7183	28.6349	31.66	36.6507	39.7468	36.6236
ENSMUSG00000055799	-0.295506	4.42339	5.38734	0.264105	transcription factor 7 like 1 (T cell specific, HMG box) [Source:MGI Symbol;Acc:MGI:1202876]	Tcf7l1	15.8591	16.786	19.7875	23.7735	21.8607	18.8067
ENSMUSG00000028936	-0.29548	7.21799	5.10992	0.0636067	ribosomal protein L22 [Source:MGI Symbol;Acc:MGI:99262]	Rpl22	116.961	152.061	126.64	180.282	139.114	166.291
ENSMUSG00000039585	-0.295095	5.41783	3.56379	0.107807	myosin IXa [Source:MGI Symbol;Acc:MGI:107735]	Myo9a	30.7271	38.509	40.5644	53.4903	41.7341	39.5931
ENSMUSG00000025511	0.254993	6.79548	12.1313	0.0232018	tetraspanin 4 [Source:MGI Symbol;Acc:MGI:1928097]	Tspan4	122.908	109.602	123.672	96.0844	107.316	95.0234
ENSMUSG00000031939	-0.295066	4.62984	2.55165	0.228286	TATA-box binding protein associated factor, RNA polymerase I, D [Source:MGI Symbol;Acc:MGI:1922566]	Taf1d	18.8327	24.6852	17.8088	26.7451	19.8734	28.705
ENSMUSG00000046139	-0.294898	5.52514	4.028	0.0948249	protein associated with topoisomerase II homolog 1 (yeast) [Source:MGI Symbol;Acc:MGI:2147679]	Patl1	35.6831	46.4083	36.6069	53.4903	40.7405	51.471
ENSMUSG00000079737	-0.294831	2.75858	4.89518	0.573377	RIKEN cDNA 3110001I22 gene [Source:MGI Symbol;Acc:MGI:1913848]	3110001I22Rik	3.96479	3.94964	4.94688	4.9528	5.96202	4.94914
ENSMUSG00000031543	-0.294831	2.75857	5.02496	0.573377	ankyrin 1, erythroid [Source:MGI Symbol;Acc:MGI:88024]	Ank1	3.96479	4.93705	3.9575	5.94336	4.96835	4.94914
ENSMUSG00000047875	-0.294831	2.75857	5.02496	0.573377	G protein-coupled receptor 157 [Source:MGI Symbol;Acc:MGI:2442046]	Gpr157	3.96479	4.93705	3.9575	5.94336	4.96835	4.94914
ENSMUSG00000010154	-0.294831	2.75858	4.85024	0.573377	spire homolog 2 (Drosophila) [Source:MGI Symbol;Acc:MGI:2446256]	Spire2	4.95598	3.94964	3.9575	4.9528	5.96202	4.94914
ENSMUSG00000029049	-0.294831	2.75858	4.85024	0.573377	MORN repeat containing 1 [Source:MGI Symbol;Acc:MGI:1924116]	Morn1	4.95598	3.94964	3.9575	4.9528	5.96202	4.94914
ENSMUSG00000030406	-0.294831	2.75858	4.97376	0.573377	gastric inhibitory polypeptide receptor [Source:MGI Symbol;Acc:MGI:1352753]	Gipr	3.96479	3.94964	4.94688	5.94336	4.96835	4.94914
ENSMUSG00000044952	-0.294831	2.75858	4.97376	0.573377	potassium channel tetramerisation domain containing 21 [Source:MGI Symbol;Acc:MGI:3643121]	Kctd21	3.96479	3.94964	4.94688	5.94336	4.96835	4.94914
ENSMUSG00000087370	-0.294831	2.75858	4.97376	0.573377	transmembrane protein 170B [Source:MGI Symbol;Acc:MGI:3647046]	Tmem170b	3.96479	3.94964	4.94688	5.94336	4.96835	4.94914
ENSMUSG00000021087	-0.294831	2.75857	2.4853	0.573377	reticulon 1 [Source:MGI Symbol;Acc:MGI:1933947]	Rtn1	3.96479	4.93705	3.9575	5.94336	3.97468	5.93897
ENSMUSG00000014837	-0.294831	2.75858	4.94594	0.573377	RIKEN cDNA 4931428F04 gene [Source:MGI Symbol;Acc:MGI:1921606]	4931428F04Rik	4.95598	3.94964	3.9575	4.9528	4.96835	5.93897
ENSMUSG00000050947	-0.294831	2.75858	4.94594	0.573377	adhesion molecule with Ig like domain 1 [Source:MGI Symbol;Acc:MGI:2653612]	Amigo1	4.95598	3.94964	3.9575	4.9528	4.96835	5.93897
ENSMUSG00000020635	-0.294831	2.75858	0.951805	0.573377	FK506 binding protein 1b [Source:MGI Symbol;Acc:MGI:1336205]	Fkbp1b	5.94718	3.94964	2.96813	3.96224	4.96835	6.92879
ENSMUSG00000022443	0.252373	9.95872	8.9111	0.0238685	myosin, heavy polypeptide 9, non-muscle [Source:MGI Symbol;Acc:MGI:107717]	Myh9	1184.48	1014.07	1040.82	823.156	960.879	935.387
ENSMUSG00000040177	-0.294482	4.97087	4.56746	0.172587	RIKEN cDNA 2310057M21 gene [Source:MGI Symbol;Acc:MGI:1915527]	2310057M21Rik	23.7887	30.6097	24.7344	35.6602	27.8228	33.6541
ENSMUSG00000036160	-0.294482	4.97087	3.31315	0.172587	surfeit gene 6 [Source:MGI Symbol;Acc:MGI:98447]	Surf6	23.7887	31.5971	23.745	35.6602	26.8291	34.644
ENSMUSG00000001376	-0.294336	5.88887	28.8383	0.0574954	VPS50 EARP/GARPII complex subunit [Source:MGI Symbol;Acc:MGI:1920538]	Vps50	50.551	53.3201	50.4582	64.3864	60.6139	64.3388
ENSMUSG00000017721	0.251617	6.76513	11.322	0.0266664	phosphatidylinositol glycan anchor biosynthesis, class T [Source:MGI Symbol;Acc:MGI:1926178]	Pigt	118.944	122.439	106.853	95.0938	92.4113	104.922
ENSMUSG00000037606	0.251199	6.55331	8.02437	0.0400312	oxysterol binding protein-like 5 [Source:MGI Symbol;Acc:MGI:1930265]	Osbpl5	106.058	90.8417	102.895	78.2543	92.4113	81.1659
ENSMUSG00000026479	0.250939	7.21479	43.87	0.00963248	laminin, gamma 2 [Source:MGI Symbol;Acc:MGI:99913]	Lamc2	162.556	156.011	159.29	130.754	137.126	133.627
ENSMUSG00000063015	-0.293876	3.33176	1.87504	0.470259	cyclin I [Source:MGI Symbol;Acc:MGI:1341077]	Ccni	5.94718	6.91187	8.90438	10.8962	8.94303	6.92879
ENSMUSG00000028636	-0.293876	3.33176	6.63661	0.470259	phosphopantothenoylcysteine synthetase [Source:MGI Symbol;Acc:MGI:1915237]	Ppcs	6.93837	7.89928	6.92563	8.91505	7.94936	9.89828
ENSMUSG00000062198	-0.293876	3.33176	1.3986	0.470259	RIKEN cDNA 2700097O09 gene [Source:MGI Symbol;Acc:MGI:1919908]	2700097O09Rik	9.91196	5.92446	5.93626	6.93392	9.9367	9.89828
ENSMUSG00000030016	-0.293706	6.98599	3.28175	0.119006	zinc finger protein 638 [Source:MGI Symbol;Acc:MGI:1203484]	Zfp638	92.1813	117.502	126.64	164.433	128.183	119.769
ENSMUSG00000028426	-0.293615	8.04034	4.40764	0.0795909	RAD23 homolog B, nucleotide excision repair protein [Source:MGI Symbol;Acc:MGI:105128]	Rad23b	201.213	268.575	234.482	330.847	248.417	284.081
ENSMUSG00000020284	-0.293469	3.74088	4.1775	0.394263	RIKEN cDNA 1810043G02 gene [Source:MGI Symbol;Acc:MGI:1915134]	1810043G02Rik	11.8944	9.8741	8.90438	10.8962	12.9177	13.8576
ENSMUSG00000059854	-0.293469	3.74088	4.1775	0.394263	HYDIN, axonemal central pair apparatus protein [Source:MGI Symbol;Acc:MGI:2389007]	Hydin	11.8944	9.8741	8.90438	10.8962	12.9177	13.8576
ENSMUSG00000029713	0.250929	9.72176	64.9829	0.000175463	guanine nucleotide binding protein (G protein), beta 2 [Source:MGI Symbol;Acc:MGI:95784]	Gnb2	920.821	907.429	918.141	765.703	776.056	766.127
ENSMUSG00000030835	0.250514	8.29736	7.17343	0.0358887	nodal modulator 1 [Source:MGI Symbol;Acc:MGI:2385850]	Nomo1	373.681	310.047	335.398	258.536	311.019	287.05
ENSMUSG00000025736	-0.292928	4.73194	21.22	0.214104	jumonji domain containing 8 [Source:MGI Symbol;Acc:MGI:1919356]	Jmjd8	21.8063	21.723	22.7556	26.7451	27.8228	26.7253
ENSMUSG00000022013	-0.292873	4.90087	15.4105	0.186142	DnaJ heat shock protein family (Hsp40) member C15 [Source:MGI Symbol;Acc:MGI:1913398]	Dnajc15	23.7887	25.6726	25.7238	32.6885	29.8101	29.6948
ENSMUSG00000045932	-0.292793	5.18892	5.19992	0.141943	interferon-induced protein with tetratricopeptide repeats 2 [Source:MGI Symbol;Acc:MGI:99449]	Ifit2	28.7447	35.5467	28.6919	40.613	32.7911	40.5829
ENSMUSG00000041229	-0.2927	5.63465	4.59576	0.0845843	PHD finger protein 8 [Source:MGI Symbol;Acc:MGI:2444341]	Phf8	38.6567	40.4838	49.4688	57.4525	55.6455	44.5422
ENSMUSG00000031503	0.250268	9.01849	7.26278	0.0350936	collagen, type IV, alpha 2 [Source:MGI Symbol;Acc:MGI:88455]	Col4a2	620.489	518.39	545.146	424.95	507.765	483.036
ENSMUSG00000035232	-0.292224	7.29583	4.04753	0.089948	pyruvate dehydrogenase kinase, isoenzyme 3 [Source:MGI Symbol;Acc:MGI:2384308]	Pdk3	116.961	154.036	147.417	201.084	152.031	159.362
ENSMUSG00000015757	-0.291456	5.25901	7.20064	0.13371	peptidylprolyl isomerase (cyclophilin)-like 4 [Source:MGI Symbol;Acc:MGI:1914668]	Ppil4	30.7271	30.6097	36.6069	41.6035	42.7278	35.6338
ENSMUSG00000045273	-0.291235	4.98599	3.20499	0.17495	centromere protein H [Source:MGI Symbol;Acc:MGI:1349448]	Cenph	29.7359	28.6349	21.7663	28.7263	30.8038	38.6033
ENSMUSG00000026727	-0.291077	6.61534	5.22453	0.0614218	Ras suppressor protein 1 [Source:MGI Symbol;Acc:MGI:103040]	Rsu1	74.3397	95.7787	89.0438	120.848	94.3986	101.952
ENSMUSG00000027519	-0.290888	4.64895	15.5626	0.231583	RAB22A, member RAS oncogene family [Source:MGI Symbol;Acc:MGI:105072]	Rab22a	20.8151	21.723	19.7875	24.764	24.8417	26.7253
ENSMUSG00000042535	0.249792	7.04666	30.4491	0.0151265	GTP binding protein 1 [Source:MGI Symbol;Acc:MGI:109443]	Gtpbp1	141.741	146.137	136.534	118.867	115.266	122.739
ENSMUSG00000003154	-0.290628	4.44542	6.37849	0.268056	forkhead box J2 [Source:MGI Symbol;Acc:MGI:1926805]	Foxj2	17.8415	15.7986	19.7875	21.7923	23.8481	19.7966
ENSMUSG00000004665	0.249716	8.78255	7.97905	0.0294976	calponin 2 [Source:MGI Symbol;Acc:MGI:105093]	Cnn2	525.334	456.183	447.198	361.555	416.348	423.646
ENSMUSG00000021773	0.249149	7.42891	10.7855	0.0162412	catechol-O-methyltransferase domain containing 1 [Source:MGI Symbol;Acc:MGI:1916406]	Comtd1	200.222	181.683	173.141	143.631	157.993	165.301
ENSMUSG00000027165	-0.289722	3.92459	16.0106	0.36583	RIKEN cDNA B230118H07 gene [Source:MGI Symbol;Acc:MGI:1915420]	B230118H07Rik	11.8944	11.8489	11.8725	14.8584	14.905	13.8576
ENSMUSG00000025766	-0.289722	3.92459	7.9882	0.36583	DNA segment, Chr 3, ERATO Doi 751, expressed [Source:MGI Symbol;Acc:MGI:1289213]	D3Ertd751e	12.8856	10.8615	11.8725	13.8678	15.8987	13.8576
ENSMUSG00000034168	0.24801	6.51214	17.5453	0.0456952	interferon regulatory factor 2 binding protein-like [Source:MGI Symbol;Acc:MGI:2442463]	Irf2bpl	93.1725	95.7787	101.906	85.1882	82.4746	77.2066
ENSMUSG00000000555	0.247589	7.0997	23.0242	0.0141568	integrin alpha 5 (fibronectin receptor alpha) [Source:MGI Symbol;Acc:MGI:96604]	Itga5	140.75	153.048	146.428	128.773	118.247	123.728
ENSMUSG00000025907	-0.289146	5.38971	16.1487	0.118774	RB1-inducible coiled-coil 1 [Source:MGI Symbol;Acc:MGI:1341850]	Rb1cc1	33.7007	37.5216	36.6069	46.5563	42.7278	42.5626
ENSMUSG00000036873	-0.289081	4.74976	5.61244	0.217112	RIKEN cDNA 2410004B18 gene [Source:MGI Symbol;Acc:MGI:1913671]	2410004B18Rik	24.7799	19.7482	22.7556	24.764	30.8038	26.7253
ENSMUSG00000021024	-0.289068	7.50957	4.99802	0.0658427	proteasome (prosome, macropain) subunit, alpha type 6 [Source:MGI Symbol;Acc:MGI:1347006]	Psma6	141.741	159.96	185.013	223.867	198.734	172.23
ENSMUSG00000041328	-0.288849	5.2714	4.22556	0.135443	PCF11 cleavage and polyadenylation factor subunit [Source:MGI Symbol;Acc:MGI:1919579]	Pcf11	32.7095	28.6349	37.5963	40.613	45.7088	34.644
ENSMUSG00000057234	-0.288822	3.57095	6.06886	0.433535	methyltransferase like 15 [Source:MGI Symbol;Acc:MGI:1924144]	Mettl15	9.91196	8.88669	7.91501	9.90561	10.9304	11.8779
ENSMUSG00000070733	0.244738	7.88884	36.312	0.00139144	FRY like transcription coactivator [Source:MGI Symbol;Acc:MGI:1919563]	Fryl	263.658	249.815	251.301	208.018	219.601	217.762
ENSMUSG00000005871	-0.288775	6.26831	4.77447	0.0706386	adenomatosis polyposis coli [Source:MGI Symbol;Acc:MGI:88039]	Apc	58.4806	68.1313	76.1819	94.1033	81.4809	72.2574
ENSMUSG00000015647	0.244585	8.12723	13.5096	0.0100107	laminin, alpha 5 [Source:MGI Symbol;Acc:MGI:105382]	Lama5	321.148	283.387	298.792	237.735	269.285	255.376
ENSMUSG00000021186	-0.288569	4.5609	4.56863	0.250786	fibulin 5 [Source:MGI Symbol;Acc:MGI:1346091]	Fbln5	21.8063	19.7482	16.8194	20.8018	23.8481	26.7253
ENSMUSG00000004393	0.244175	6.75637	11.3541	0.0320004	DEAD (Asp-Glu-Ala-Asp) box polypeptide 56 [Source:MGI Symbol;Acc:MGI:1277172]	Ddx56	112.996	108.615	123.672	99.0561	102.348	90.0743
ENSMUSG00000022967	-0.288141	5.45088	12.2211	0.112	interferon (alpha and beta) receptor 1 [Source:MGI Symbol;Acc:MGI:107658]	Ifnar1	34.6919	38.509	39.575	49.528	44.7151	43.5524
ENSMUSG00000033788	0.243285	7.22119	15.2334	0.0118798	dysferlin [Source:MGI Symbol;Acc:MGI:1349385]	Dysf	169.495	157.986	151.375	126.792	136.133	141.545
ENSMUSG00000029028	0.243215	6.59823	29.6618	0.0433646	leucine rich repeat containing 47 [Source:MGI Symbol;Acc:MGI:1920196]	Lrrc47	104.076	99.7284	104.874	86.1788	89.4303	85.1252
ENSMUSG00000021189	-0.287873	4.34354	8.19734	0.291108	ataxin 3 [Source:MGI Symbol;Acc:MGI:1099442]	Atxn3	14.8679	16.786	17.8088	21.7923	19.8734	18.8067
ENSMUSG00000035900	-0.287873	4.34354	7.93212	0.291108	GRAM domain containing 4 [Source:MGI Symbol;Acc:MGI:2676308]	Gramd4	16.8503	14.8111	17.8088	19.8112	21.8607	18.8067
ENSMUSG00000029836	-0.287873	4.34355	1.57662	0.291108	chromobox 3 [Source:MGI Symbol;Acc:MGI:108515]	Cbx3	20.8151	12.8363	15.83	15.849	24.8417	19.7966
ENSMUSG00000036570	-0.287519	4.84397	7.63778	0.203691	FXYD domain-containing ion transport regulator 1 [Source:MGI Symbol;Acc:MGI:1889273]	Fxyd1	21.8063	24.6852	25.7238	32.6885	27.8228	27.7152
ENSMUSG00000006699	-0.287393	8.05295	5.16549	0.0625345	cell division cycle 42 [Source:MGI Symbol;Acc:MGI:106211]	Cdc42	211.125	272.525	228.546	321.932	250.405	296.948
ENSMUSG00000030386	-0.287039	3.10146	2.25353	0.522533	zinc finger protein 606 [Source:MGI Symbol;Acc:MGI:1914620]	Zfp606	4.95598	5.92446	6.92563	8.91505	6.95569	5.93897
ENSMUSG00000032911	-0.287039	3.10147	2.20903	0.522533	chondroitin sulfate proteoglycan 4 [Source:MGI Symbol;Acc:MGI:2153093]	Cspg4	6.93837	4.93705	5.93626	5.94336	8.94303	6.92879
ENSMUSG00000062012	-0.287039	3.10146	10.4398	0.522533	zinc finger protein 13 [Source:MGI Symbol;Acc:MGI:99159]	Zfp13	5.94718	5.92446	5.93626	6.93392	6.95569	7.91862
ENSMUSG00000034947	-0.287039	3.10146	0.963237	0.522533	transmembrane protein 106A [Source:MGI Symbol;Acc:MGI:1922056]	Tmem106a	6.93837	6.91187	3.9575	5.94336	5.96202	9.89828
ENSMUSG00000025782	-0.286874	4.08752	3.37918	0.340097	TATA-box binding protein associated factor 3 [Source:MGI Symbol;Acc:MGI:2388097]	Taf3	11.8944	15.7986	12.8619	18.8207	13.9114	16.8271
ENSMUSG00000056770	-0.286874	4.08752	7.47452	0.340097	SET domain containing 3 [Source:MGI Symbol;Acc:MGI:1289184]	Setd3	12.8856	14.8111	12.8619	17.8301	14.905	16.8271
ENSMUSG00000026004	-0.286155	4.93241	16.8204	0.191224	KAT8 regulatory NSL complex subunit 1-like [Source:MGI Symbol;Acc:MGI:1915941]	Kansl1l	25.7711	26.6601	24.7344	31.6979	29.8101	32.6643
ENSMUSG00000038583	-0.28613	6.92652	1.47047	0.269956	phospholamban [Source:MGI Symbol;Acc:MGI:97622]	Pln	80.2869	129.351	113.778	169.386	105.329	119.769
ENSMUSG00000020319	-0.28591	4.46711	4.3205	0.271946	WD repeat containing planar cell polarity effector [Source:MGI Symbol;Acc:MGI:2144467]	Wdpcp	18.8327	19.7482	15.83	20.8018	19.8734	25.7355
ENSMUSG00000040697	-0.285892	6.04489	23.2105	0.0510776	DnaJ heat shock protein family (Hsp40) member C16 [Source:MGI Symbol;Acc:MGI:2442146]	Dnajc16	60.463	57.2698	55.4051	67.3581	70.5506	73.2472
ENSMUSG00000033088	0.241323	6.84811	6.35921	0.0443865	TRIO and F-actin binding protein [Source:MGI Symbol;Acc:MGI:1349410]	Triobp	134.803	111.577	121.693	94.1033	113.278	103.932
ENSMUSG00000020741	0.240691	8.86502	26.3313	0.00202482	clustered mitochondria (cluA/CLU1) homolog [Source:MGI Symbol;Acc:MGI:1921398]	Cluh	523.352	500.617	484.794	409.102	427.278	440.473
ENSMUSG00000040648	-0.28534	5.34938	4.0294	0.129212	diphosphoinositol pentakisphosphate kinase 2 [Source:MGI Symbol;Acc:MGI:2142810]	Ppip5k2	32.7095	40.4838	31.66	45.5658	35.7721	46.5219
ENSMUSG00000002325	-0.285335	4.76735	10.8079	0.22009	interferon regulatory factor 9 [Source:MGI Symbol;Acc:MGI:107587]	Irf9	20.8151	23.6978	23.745	29.7168	26.8291	26.7253
ENSMUSG00000021368	-0.285335	4.76735	16.3329	0.22009	TBC1 domain family, member 7 [Source:MGI Symbol;Acc:MGI:1914296]	Tbc1d7	23.7887	21.723	22.7556	26.7451	28.8164	27.7152
ENSMUSG00000039917	-0.285318	3.77606	9.58621	0.400892	rhomboid domain containing 2 [Source:MGI Symbol;Acc:MGI:1915612]	Rhbdd2	10.9032	10.8615	9.89376	12.8773	11.924	13.8576
ENSMUSG00000096966	-0.285318	3.77606	1.18135	0.400892	predicted gene, 18336 [Source:MGI Symbol;Acc:MGI:5010521]	Gm18336	8.92077	13.8237	8.90438	14.8584	8.94303	14.8474
ENSMUSG00000005949	-0.285075	5.51998	12.4427	0.106941	cystinosis, nephropathic [Source:MGI Symbol;Acc:MGI:1932872]	Ctns	38.6567	37.5216	42.5432	49.528	50.6772	44.5422
ENSMUSG00000001761	-0.284636	4.23392	1.83605	0.316701	smoothened, frizzled class receptor [Source:MGI Symbol;Acc:MGI:108075]	Smo	15.8591	11.8489	17.8088	17.8301	22.8544	14.8474
ENSMUSG00000024145	-0.284636	4.23392	7.08033	0.316701	phosphatidylinositol glycan anchor biosynthesis, class F [Source:MGI Symbol;Acc:MGI:99462]	Pigf	13.8767	14.8111	16.8194	19.8112	18.8797	16.8271
ENSMUSG00000066800	-0.284636	4.23391	7.27712	0.316701	ribonuclease L (2', 5'-oligoisoadenylate synthetase-dependent) [Source:MGI Symbol;Acc:MGI:1098272]	Rnasel	13.8767	16.786	14.8406	19.8112	16.8924	18.8067
ENSMUSG00000049717	-0.284271	4.58094	3.43259	0.254318	ligase IV, DNA, ATP-dependent [Source:MGI Symbol;Acc:MGI:1335098]	Lig4	19.8239	16.786	22.7556	23.7735	27.8228	20.7864
ENSMUSG00000030876	-0.284042	4.86046	6.44922	0.206421	methyltransferase like 9 [Source:MGI Symbol;Acc:MGI:1914862]	Mettl9	21.8063	24.6852	26.7132	32.6885	29.8101	26.7253
ENSMUSG00000062647	-0.283886	5.0945	2.54182	0.168833	ribosomal protein L7A [Source:MGI Symbol;Acc:MGI:1353472]	Rpl7a	23.7887	33.5719	29.6813	42.5941	29.8101	33.6541
ENSMUSG00000048047	-0.283773	5.29584	15.3886	0.138891	zinc finger and BTB domain containing 33 [Source:MGI Symbol;Acc:MGI:1927290]	Zbtb33	31.7183	34.5593	34.6282	43.5847	39.7468	39.5931
ENSMUSG00000022757	-0.28363	7.30789	1.61041	0.25052	Trk-fused gene [Source:MGI Symbol;Acc:MGI:1338041]	Tfg	106.058	163.91	153.353	219.904	143.088	152.433
ENSMUSG00000020659	-0.282992	6.05924	6.49861	0.0522554	Casitas B-lineage lymphoma-like 1 [Source:MGI Symbol;Acc:MGI:2144842]	Cbll1	52.5334	57.2698	65.2988	78.2543	71.5442	63.349
ENSMUSG00000033392	-0.282987	5.94407	14.1783	0.0624675	CLIP associating protein 2 [Source:MGI Symbol;Acc:MGI:1923749]	Clasp2	53.5246	50.3579	57.3838	65.377	69.5569	61.3693
ENSMUSG00000026425	-0.28298	5.81888	29.4966	0.0748333	SLIT-ROBO Rho GTPase activating protein 2 [Source:MGI Symbol;Acc:MGI:109605]	Srgap2	47.5774	50.3579	49.4688	61.4148	58.6265	59.3897
ENSMUSG00000027959	-0.28295	5.36103	12.9725	0.13081	SAS-6 centriolar assembly protein [Source:MGI Symbol;Acc:MGI:1920026]	Sass6	32.7095	37.5216	35.6175	45.5658	40.7405	42.5626
ENSMUSG00000042742	-0.282911	4.94792	4.3831	0.193736	base methyltransferase of 25S rRNA 2 [Source:MGI Symbol;Acc:MGI:2141466]	Bmt2	29.7359	25.6726	22.7556	27.7357	31.7974	35.6338
ENSMUSG00000029209	-0.28288	4.68642	3.35605	0.238061	glucosamine-6-phosphate deaminase 2 [Source:MGI Symbol;Acc:MGI:1915230]	Gnpda2	17.8415	22.7104	23.745	30.7074	23.8481	23.7559
ENSMUSG00000028842	-0.28288	4.68643	19.7751	0.238061	argonaute RISC catalytic subunit 3 [Source:MGI Symbol;Acc:MGI:2446634]	Ago3	20.8151	21.723	21.7663	26.7451	25.8354	25.7355
ENSMUSG00000070972	-0.282832	4.36681	4.71513	0.295343	DnaJ heat shock protein family (Hsp40) member C25 [Source:MGI Symbol;Acc:MGI:1919679]	Dnajc25	14.8679	16.786	18.7981	22.7829	20.8671	17.8169
ENSMUSG00000045140	-0.282832	4.36681	5.61881	0.295343	phosphatidylinositol glycan anchor biosynthesis, class W [Source:MGI Symbol;Acc:MGI:1917575]	Pigw	14.8679	18.7608	16.8194	22.7829	18.8797	19.7966
ENSMUSG00000041966	-0.282747	3.95562	4.08217	0.37164	DDB1 and CUL4 associated factor 17 [Source:MGI Symbol;Acc:MGI:1923013]	Dcaf17	11.8944	10.8615	13.8513	14.8584	16.8924	12.8678
ENSMUSG00000059743	-0.282747	3.95561	4.15217	0.37164	farnesyl diphosphate synthetase [Source:MGI Symbol;Acc:MGI:104888]	Fdps	10.9032	11.8489	13.8513	16.8395	14.905	12.8678
ENSMUSG00000022261	-0.282599	6.29887	2.57144	0.158918	syndecan 2 [Source:MGI Symbol;Acc:MGI:1349165]	Sdc2	78.3045	74.0557	55.4051	73.3015	77.5062	101.952
ENSMUSG00000040321	-0.282561	3.3783	2.36529	0.478946	zinc finger protein 770 [Source:MGI Symbol;Acc:MGI:2445100]	Zfp770	5.94718	7.89928	8.90438	10.8962	8.94303	7.91862
ENSMUSG00000021176	-0.282561	3.3783	0.619555	0.478946	EF-hand calcium binding domain 11 [Source:MGI Symbol;Acc:MGI:1926017]	Efcab11	4.95598	8.88669	8.90438	13.8678	6.95569	6.92879
ENSMUSG00000035236	-0.282561	3.3783	2.38685	0.478946	suppressor of cancer cell invasion [Source:MGI Symbol;Acc:MGI:2443716]	Scai	5.94718	8.88669	7.91501	10.8962	7.94936	8.90845
ENSMUSG00000030401	-0.282561	3.3783	9.03142	0.478946	reticulon 2 (Z-band associated protein) [Source:MGI Symbol;Acc:MGI:107612]	Rtn2	6.93837	7.89928	7.91501	9.90561	8.94303	8.90845
ENSMUSG00000023892	-0.282561	3.3783	3.83051	0.478946	zinc finger protein 51 [Source:MGI Symbol;Acc:MGI:99198]	Zfp51	6.93837	8.88669	6.92563	9.90561	7.94936	9.89828
ENSMUSG00000037788	-0.282561	3.3783	3.83051	0.478946	vesicular, overexpressed in cancer, prosurvival protein 1 [Source:MGI Symbol;Acc:MGI:2141658]	Vopp1	6.93837	8.88669	6.92563	9.90561	7.94936	9.89828
ENSMUSG00000064179	-0.282561	3.3783	8.97346	0.478946	troponin T1, skeletal, slow [Source:MGI Symbol;Acc:MGI:1333868]	Tnnt1	7.92957	7.89928	6.92563	8.91505	8.94303	9.89828
ENSMUSG00000033228	-0.28237	5.73195	15.9522	0.0848512	SR-related CTD-associated factor 11 [Source:MGI Symbol;Acc:MGI:1919443]	Scaf11	48.5686	43.446	46.5007	53.4903	59.6202	55.4303
ENSMUSG00000020708	0.240015	8.4898	14.0849	0.00912203	protease (prosome, macropain) 26S subunit, ATPase 5 [Source:MGI Symbol;Acc:MGI:105047]	Psmc5	414.32	371.266	375.963	306.083	340.829	336.541
ENSMUSG00000004264	0.237431	7.4644	32.9305	0.00750014	prohibitin 2 [Source:MGI Symbol;Acc:MGI:102520]	Phb2	192.292	182.671	191.939	157.499	165.943	157.383
ENSMUSG00000014444	0.23722	7.48183	13.3764	0.0102327	piezo-type mechanosensitive ion channel component 1 [Source:MGI Symbol;Acc:MGI:3603204]	Piezo1	205.178	184.646	184.024	151.556	166.937	168.271
ENSMUSG00000035310	-0.282077	5.24023	5.15014	0.149376	lin-54 homolog (C. elegans) [Source:MGI Symbol;Acc:MGI:2140902]	Lin54	28.7447	31.5971	36.6069	43.5847	39.7468	34.644
ENSMUSG00000003528	0.235471	6.72745	8.13247	0.0406323	solute carrier family 25 (mitochondrial carrier, citrate transporter), member 1 [Source:MGI Symbol;Acc:MGI:1345283]	Slc25a1	122.908	107.628	106.853	87.1693	99.367	99.9726
ENSMUSG00000020577	-0.281818	2.40102	4.44258	0.651157	tetraspanin 13 [Source:MGI Symbol;Acc:MGI:1913359]	Tspan13	2.97359	2.96223	2.96813	3.96224	3.97468	2.96948
ENSMUSG00000042826	-0.281818	2.40102	4.44258	0.651157	fibroblast growth factor 11 [Source:MGI Symbol;Acc:MGI:109167]	Fgf11	2.97359	2.96223	2.96813	3.96224	3.97468	2.96948
ENSMUSG00000045007	-0.281818	2.40102	4.44258	0.651157	tubulin, gamma 2 [Source:MGI Symbol;Acc:MGI:2144208]	Tubg2	2.97359	2.96223	2.96813	3.96224	3.97468	2.96948
ENSMUSG00000053141	-0.281818	2.40102	4.46604	0.651157	protein tyrosine phosphatase, receptor type, T [Source:MGI Symbol;Acc:MGI:1321152]	Ptprt	2.97359	2.96223	2.96813	2.97168	3.97468	3.95931
ENSMUSG00000066613	-0.281818	2.40102	4.46604	0.651157	zinc finger protein 932 [Source:MGI Symbol;Acc:MGI:1916754]	Zfp932	2.97359	2.96223	2.96813	2.97168	3.97468	3.95931
ENSMUSG00000045114	-0.281818	2.40102	4.56815	0.651157	proline-rich transmembrane protein 2 [Source:MGI Symbol;Acc:MGI:1916267]	Prrt2	2.97359	2.96223	2.96813	3.96224	2.98101	3.95931
ENSMUSG00000037808	-0.281345	4.48848	3.04046	0.275779	family with sequence similarity 76, member B [Source:MGI Symbol;Acc:MGI:1920076]	Fam76b	15.8591	21.723	17.8088	25.7546	18.8797	22.766
ENSMUSG00000045128	-0.281345	4.48849	3.33411	0.275779	ribosomal protein L18A [Source:MGI Symbol;Acc:MGI:1924058]	Rpl18a	21.8063	16.786	16.8194	18.8207	23.8481	24.7457
ENSMUSG00000038582	-0.281345	4.48849	3.93119	0.275779	PTC7 protein phosphatase homolog [Source:MGI Symbol;Acc:MGI:2444593]	Pptc7	20.8151	18.7608	15.83	19.8112	21.8607	25.7355
ENSMUSG00000040297	-0.281303	5.30792	5.08949	0.140604	SUN domain containing ossification factor [Source:MGI Symbol;Acc:MGI:2138346]	Suco	29.7359	34.5593	37.5963	46.5563	40.7405	36.6236
ENSMUSG00000021775	-0.280779	4.11527	4.08966	0.345252	nuclear receptor subfamily 1, group D, member 2 [Source:MGI Symbol;Acc:MGI:2449205]	Nr1d2	11.8944	13.8237	15.83	18.8207	16.8924	14.8474
ENSMUSG00000035049	0.234912	6.64657	16.2004	0.0471424	ribosomal RNA processing 12 homolog (S. cerevisiae) [Source:MGI Symbol;Acc:MGI:2147437]	Rrp12	112.005	103.678	102.895	85.1882	92.4113	93.0438
ENSMUSG00000044763	-0.28065	4.87676	2.87529	0.209128	tRNA methyltransferase 10C [Source:MGI Symbol;Acc:MGI:1196261]	Trmt10c	21.8063	22.7104	29.6813	32.6885	32.7911	24.7457
ENSMUSG00000038371	-0.280572	5.74086	2.54228	0.160934	SET binding factor 2 [Source:MGI Symbol;Acc:MGI:1921831]	Sbf2	37.6655	54.3075	47.49	67.3581	47.6961	54.4405
ENSMUSG00000030706	-0.2801	4.6007	3.51653	0.257803	mitochondrial ribosomal protein L48 [Source:MGI Symbol;Acc:MGI:1289321]	Mrpl48	17.8415	18.7608	23.745	26.7451	25.8354	20.7864
ENSMUSG00000047735	-0.2801	4.6007	5.09709	0.257803	sterile alpha motif domain containing 9-like [Source:MGI Symbol;Acc:MGI:1343184]	Samd9l	17.8415	20.7356	21.7663	27.7357	23.8481	21.7762
ENSMUSG00000028619	-0.2801	4.60069	3.60782	0.257803	transcription elongation factor A (SII) N-terminal and central domain containing 2 [Source:MGI Symbol;Acc:MGI:1913776]	Tceanc2	18.8327	23.6978	17.8088	25.7546	20.8671	26.7253
ENSMUSG00000030060	-0.279958	5.43445	23.1716	0.124731	5-hydroxymethylcytosine (hmC) binding, ES cell specific [Source:MGI Symbol;Acc:MGI:1914053]	Hmces	36.6743	38.509	36.6069	45.5658	43.7215	46.5219
ENSMUSG00000038170	0.234723	7.27138	27.0211	0.0134898	phosphodiesterase 4D interacting protein (myomegalin) [Source:MGI Symbol;Acc:MGI:1891434]	Pde4dip	170.486	158.973	165.226	135.707	145.076	139.566
ENSMUSG00000074505	-0.279761	5.64896	9.83765	0.0974603	FAT atypical cadherin 3 [Source:MGI Symbol;Acc:MGI:2444314]	Fat3	39.6479	44.4334	46.5007	57.4525	51.6708	49.4914
ENSMUSG00000039396	-0.279761	5.64897	13.5613	0.0974603	nei like 3 (E. coli) [Source:MGI Symbol;Acc:MGI:2384588]	Neil3	45.595	40.4838	44.5219	50.5186	56.6392	51.471
ENSMUSG00000047412	-0.279742	4.96327	22.3613	0.196227	zinc finger and BTB domain containing 44 [Source:MGI Symbol;Acc:MGI:1925123]	Zbtb44	25.7711	26.6601	26.7132	32.6885	31.7974	31.6745
ENSMUSG00000031168	0.233306	7.3169	12.6246	0.0125888	phenylalkylamine Ca2+ antagonist (emopamil) binding protein [Source:MGI Symbol;Acc:MGI:107822]	Ebp	178.415	158.973	173.141	137.688	155.012	141.545
ENSMUSG00000017664	-0.279225	4.25901	2.43458	0.321316	solute carrier family 35, member C2 [Source:MGI Symbol;Acc:MGI:2385166]	Slc35c2	17.8415	15.7986	12.8619	15.849	17.8861	22.766
ENSMUSG00000021598	-0.279042	4.7048	2.1628	0.241244	mediator complex subunit 10 [Source:MGI Symbol;Acc:MGI:106331]	Med10	19.8239	26.6601	18.7981	28.7263	20.8671	29.6948
ENSMUSG00000031399	-0.27894	5.04488	16.5449	0.184245	family with sequence similarity 3, member A [Source:MGI Symbol;Acc:MGI:1913544]	Fam3a	28.7447	28.6349	26.7132	32.6885	33.7848	35.6338
ENSMUSG00000030224	0.233121	6.82097	8.9929	0.0361915	serine/threonine kinase receptor associated protein [Source:MGI Symbol;Acc:MGI:1329037]	Strap	113.988	115.527	130.598	106.981	105.329	94.0336
ENSMUSG00000029833	-0.278365	5.79764	29.8653	0.0819828	tripartite motif-containing 24 [Source:MGI Symbol;Acc:MGI:109275]	Trim24	47.5774	48.3831	49.4688	60.4242	58.6265	57.41
ENSMUSG00000032402	-0.278226	5.12213	19.3399	0.173099	SMAD family member 3 [Source:MGI Symbol;Acc:MGI:1201674]	Smad3	30.7271	28.6349	29.6813	34.6696	36.7658	36.6236
ENSMUSG00000025139	-0.278029	6.00835	8.40174	0.0610813	toll interacting protein [Source:MGI Symbol;Acc:MGI:1891808]	Tollip	54.5158	62.2068	52.4369	70.3298	61.6075	73.2472
ENSMUSG00000027339	-0.277966	4.38971	6.53384	0.299505	Ras association (RalGDS/AF-6) domain family member 2 [Source:MGI Symbol;Acc:MGI:2442060]	Rassf2	18.8327	15.7986	16.8194	18.8207	22.8544	20.7864
ENSMUSG00000005362	-0.277871	5.65842	26.9932	0.0985859	cereblon [Source:MGI Symbol;Acc:MGI:1913277]	Crbn	44.6038	42.4586	44.5219	52.4997	54.6518	52.4609
ENSMUSG00000011148	-0.277614	3.81042	5.31255	0.407305	adenylosuccinate synthetase like 1 [Source:MGI Symbol;Acc:MGI:87947]	Adssl1	10.9032	9.8741	11.8725	12.8773	14.905	11.8779
ENSMUSG00000021007	-0.277614	3.81041	1.37869	0.407305	spermatogenesis associated 7 [Source:MGI Symbol;Acc:MGI:2144877]	Spata7	7.92957	12.8363	11.8725	16.8395	10.9304	11.8779
ENSMUSG00000022911	-0.277614	3.81041	1.3754	0.407305	ADP-ribosylation factor-like 13B [Source:MGI Symbol;Acc:MGI:1915396]	Arl13b	11.8944	12.8363	7.91501	11.8867	10.9304	16.8271
ENSMUSG00000026782	-0.277587	5.19543	3.07991	0.16272	abl-interactor 2 [Source:MGI Symbol;Acc:MGI:106913]	Abi2	26.7623	36.5342	30.6707	43.5847	31.7974	38.6033
ENSMUSG00000038014	0.231494	7.36388	12.1349	0.012656	family with sequence similarity 120, member A [Source:MGI Symbol;Acc:MGI:2446163]	Fam120a	163.547	183.658	180.066	160.471	143.088	145.505
ENSMUSG00000024750	-0.277204	6.2621	4.65354	0.0734315	zinc finger, AN1-type domain 5 [Source:MGI Symbol;Acc:MGI:1278334]	Zfand5	66.4102	77.0179	59.3626	82.2165	71.5442	92.054
ENSMUSG00000016409	-0.27681	5.56089	6.3095	0.112103	NFKB activating protein [Source:MGI Symbol;Acc:MGI:1914300]	Nkap	36.6743	44.4334	41.5538	55.4714	44.7151	48.5016
ENSMUSG00000028224	-0.276614	6.47783	2.69868	0.150523	nibrin [Source:MGI Symbol;Acc:MGI:1351625]	Nbn	64.4278	90.8417	81.1288	113.914	81.4809	91.0641
ENSMUSG00000020396	-0.276331	2.82729	0.677609	0.585805	neurofilament, heavy polypeptide [Source:MGI Symbol;Acc:MGI:97309]	Nefh	4.95598	2.96223	5.93626	4.9528	7.94936	3.95931
ENSMUSG00000028629	-0.276331	2.82729	2.45713	0.585805	exonuclease 5 [Source:MGI Symbol;Acc:MGI:1920422]	Exo5	4.95598	3.94964	4.94688	4.9528	6.95569	4.94914
ENSMUSG00000046096	-0.276331	2.82729	2.45713	0.585805	cDNA sequence BC030336 [Source:MGI Symbol;Acc:MGI:2446240]	BC030336	4.95598	3.94964	4.94688	4.9528	6.95569	4.94914
ENSMUSG00000071281	-0.276331	2.82729	2.45713	0.585805	zinc finger protein 65 [Source:MGI Symbol;Acc:MGI:107769]	Zfp65	4.95598	3.94964	4.94688	4.9528	6.95569	4.94914
ENSMUSG00000038225	-0.276331	2.82729	4.55749	0.585805	primase and polymerase (DNA-directed) [Source:MGI Symbol;Acc:MGI:3603756]	Primpol	4.95598	3.94964	4.94688	5.94336	5.96202	4.94914
ENSMUSG00000056458	-0.276331	2.82729	4.55749	0.585805	MOK protein kinase [Source:MGI Symbol;Acc:MGI:1336881]	Mok	4.95598	3.94964	4.94688	5.94336	5.96202	4.94914
ENSMUSG00000053070	-0.276331	2.82729	4.74045	0.585805	RIKEN cDNA 9230110C19 gene [Source:MGI Symbol;Acc:MGI:3045346]	9230110C19Rik	3.96479	4.93705	4.94688	5.94336	4.96835	5.93897
ENSMUSG00000060180	-0.276331	2.82729	2.26232	0.585805	myosin, heavy polypeptide 13, skeletal muscle [Source:MGI Symbol;Acc:MGI:1339967]	Myh13	5.94718	3.94964	3.9575	4.9528	5.96202	5.93897
ENSMUSG00000026811	-0.276331	2.82729	0.688622	0.585805	ST6 (alpha-N-acetyl-neuraminyl-2,3-beta-galactosyl-1,3)-N-acetylgalactosaminide alpha-2,6-sialyltransferase 6 [Source:MGI Symbol;Acc:MGI:1355316]	St6galnac6	4.95598	5.92446	2.96813	4.9528	3.97468	7.91862
ENSMUSG00000038302	-0.276104	3.98599	3.09941	0.377292	lactation elevated 1 [Source:MGI Symbol;Acc:MGI:2148801]	Lace1	11.8944	10.8615	14.8406	15.849	16.8924	12.8678
ENSMUSG00000057409	-0.276052	4.6202	5.61537	0.261243	zinc finger protein 53 [Source:MGI Symbol;Acc:MGI:99200]	Zfp53	19.8239	18.7608	22.7556	25.7546	26.8291	21.7762
ENSMUSG00000041794	-0.276052	4.6202	3.75257	0.261243	myosin VIIA and Rab interacting protein [Source:MGI Symbol;Acc:MGI:2384407]	Myrip	22.7975	17.7734	20.7769	21.7923	28.8164	23.7559
ENSMUSG00000025898	-0.276052	4.62019	3.38899	0.261243	CWF19-like 2, cell cycle control (S. pombe) [Source:MGI Symbol;Acc:MGI:1918023]	Cwf19l2	19.8239	23.6978	17.8088	25.7546	20.8671	27.7152
ENSMUSG00000021192	-0.276029	5.05924	13.0361	0.186528	golgi autoantigen, golgin subfamily a, 5 [Source:MGI Symbol;Acc:MGI:1351475]	Golga5	26.7623	29.6223	28.6919	36.6507	32.7911	33.6541
ENSMUSG00000021945	-0.275582	5.45632	17.7663	0.127684	zinc finger, MYM-type 2 [Source:MGI Symbol;Acc:MGI:1923257]	Zmym2	37.6655	36.5342	39.575	46.5563	47.6961	43.5524
ENSMUSG00000029338	-0.275576	6.48318	4.90087	0.0678708	anthrax toxin receptor 2 [Source:MGI Symbol;Acc:MGI:1919164]	Antxr2	69.3837	78.9928	89.0438	107.971	95.3923	84.1353
ENSMUSG00000051853	0.230961	7.19705	10.4682	0.0178578	ADP-ribosylation factor 3 [Source:MGI Symbol;Acc:MGI:99432]	Arf3	168.503	153.048	147.417	123.82	135.139	140.556
ENSMUSG00000051351	-0.275307	4.72296	5.10982	0.244391	zinc finger protein 46 [Source:MGI Symbol;Acc:MGI:99192]	Zfp46	24.7799	21.723	19.7875	23.7735	26.8291	29.6948
ENSMUSG00000060601	-0.27499	5.20839	3.01815	0.16468	nuclear receptor subfamily 1, group H, member 2 [Source:MGI Symbol;Acc:MGI:1352463]	Nr1h2	37.6655	28.6349	28.6919	31.6979	41.7341	41.5728
ENSMUSG00000043323	-0.274941	4.1425	2.52262	0.350288	fibrosin-like 1 [Source:MGI Symbol;Acc:MGI:1920907]	Fbrsl1	15.8591	11.8489	14.8406	14.8584	20.8671	15.8372
ENSMUSG00000022280	-0.274941	4.14249	10.5561	0.350288	ring finger protein 19A [Source:MGI Symbol;Acc:MGI:1353623]	Rnf19a	13.8767	13.8237	14.8406	17.8301	17.8861	15.8372
ENSMUSG00000052504	-0.274941	4.14248	0.958254	0.364691	Eph receptor A3 [Source:MGI Symbol;Acc:MGI:99612]	Epha3	9.91196	17.7734	14.8406	22.7829	12.9177	15.8372
ENSMUSG00000037570	-0.274941	4.14248	1.49182	0.350288	microspherule protein 1 [Source:MGI Symbol;Acc:MGI:1858420]	Mcrs1	11.8944	17.7734	12.8619	20.8018	12.9177	17.8169
ENSMUSG00000073639	-0.274713	5.86047	10.0336	0.0791625	RAB18, member RAS oncogene family [Source:MGI Symbol;Acc:MGI:102790]	Rab18	51.5422	46.4083	54.4157	60.4242	66.5759	57.41
ENSMUSG00000027599	-0.274713	5.86046	21.3622	0.0791625	armadillo repeat containing 1 [Source:MGI Symbol;Acc:MGI:1921502]	Armc1	51.5422	52.3327	48.4794	60.4242	59.6202	64.3388
ENSMUSG00000066640	-0.274665	4.81888	16.5179	0.228843	F-box and leucine-rich repeat protein 18 [Source:MGI Symbol;Acc:MGI:2444450]	Fbxl18	22.7975	24.6852	23.745	29.7168	27.8228	28.705
ENSMUSG00000029516	-0.274481	5.62504	5.31315	0.106908	citron [Source:MGI Symbol;Acc:MGI:105313]	Cit	41.6302	38.509	48.4794	53.4903	56.6392	45.5321
ENSMUSG00000021127	-0.274183	5.94795	2.54589	0.160682	zinc finger protein 36, C3H type-like 1 [Source:MGI Symbol;Acc:MGI:107946]	Zfp36l1	65.419	46.4083	50.4582	53.4903	74.5252	68.2981
ENSMUSG00000027255	-0.273878	5.72746	2.92321	0.137153	ADP-ribosylation factor GTPase activating protein 2 [Source:MGI Symbol;Acc:MGI:1924288]	Arfgap2	53.5246	46.4083	38.5857	47.5469	54.6518	65.3286
ENSMUSG00000051674	-0.27378	5.40666	4.47481	0.13715	DCN1, defective in cullin neddylation 1, domain containing 4 (S. cerevisiae) [Source:MGI Symbol;Acc:MGI:2140972]	Dcun1d4	41.6302	32.5845	35.6175	38.6319	49.6835	44.5422
ENSMUSG00000031458	-0.27378	5.40665	7.54277	0.13715	coordinator of PRMT5, differentiation stimulator [Source:MGI Symbol;Acc:MGI:1913673]	Coprs	34.6919	40.4838	34.6282	46.5563	39.7468	46.5219
ENSMUSG00000032194	0.230903	8.00556	22.4685	0.0030196	KN motif and ankyrin repeat domains 2 [Source:MGI Symbol;Acc:MGI:2384568]	Kank2	287.447	264.626	274.057	224.857	243.449	235.579
ENSMUSG00000030604	-0.273668	3.15591	6.73408	0.532429	zinc finger protein 626 [Source:MGI Symbol;Acc:MGI:1918413]	Zfp626	5.94718	5.92446	6.92563	7.92448	7.94936	6.92879
ENSMUSG00000030638	-0.273668	3.15591	6.73408	0.532429	SH3-domain GRB2-like 3 [Source:MGI Symbol;Acc:MGI:700011]	Sh3gl3	5.94718	5.92446	6.92563	7.92448	7.94936	6.92879
ENSMUSG00000058979	-0.273668	3.15591	1.56084	0.532429	cat eye syndrome chromosome region, candidate 5 [Source:MGI Symbol;Acc:MGI:2136976]	Cecr5	7.92957	4.93705	5.93626	5.94336	8.94303	7.91862
ENSMUSG00000039477	0.230548	7.11696	32.1343	0.0215131	trinucleotide repeat containing 18 [Source:MGI Symbol;Acc:MGI:3648294]	Tnrc18	143.723	151.074	148.406	129.763	123.215	124.718
ENSMUSG00000030660	-0.272582	6.25278	2.96564	0.134813	phosphatidylinositol 3-kinase, C2 domain containing, alpha polypeptide [Source:MGI Symbol;Acc:MGI:1203729]	Pik3c2a	57.4894	65.169	79.1501	94.1033	81.4809	68.2981
ENSMUSG00000057541	-0.272354	5.68645	3.79809	0.101954	pseudouridylate synthase 7 [Source:MGI Symbol;Acc:MGI:1925947]	Pus7	45.595	38.509	50.4582	52.4997	62.6012	47.5117
ENSMUSG00000071359	-0.272095	3.42339	2.08189	0.487211	TATA box binding protein-like 1 [Source:MGI Symbol;Acc:MGI:1339946]	Tbpl1	6.93837	6.91187	9.89376	9.90561	10.9304	7.91862
ENSMUSG00000016940	-0.272095	3.42339	4.16101	0.487211	potassium channel tetramerisation domain containing 2 [Source:MGI Symbol;Acc:MGI:1917632]	Kctd2	8.92077	7.89928	6.92563	8.91505	8.94303	10.8881
ENSMUSG00000026917	-0.27192	5.78473	9.69933	0.0907642	WD repeat domain 5 [Source:MGI Symbol;Acc:MGI:2155884]	Wdr5	44.6038	52.3327	47.49	62.4053	53.6582	58.3998
ENSMUSG00000037410	-0.271673	4.74088	7.41509	0.247501	TBC1 domain family, member 2B [Source:MGI Symbol;Acc:MGI:1914266]	Tbc1d2b	21.8063	20.7356	24.7344	27.7357	28.8164	24.7457
ENSMUSG00000040423	-0.271581	5.41783	9.45878	0.138721	RING CCCH (C3H) domains 1 [Source:MGI Symbol;Acc:MGI:2685397]	Rc3h1	33.7007	38.509	38.5857	48.5375	42.7278	42.5626
ENSMUSG00000021532	-0.271057	3.64896	1.25854	0.448018	FAST kinase domains 3 [Source:MGI Symbol;Acc:MGI:1916827]	Fastkd3	10.9032	6.91187	10.8831	9.90561	14.905	9.89828
ENSMUSG00000058135	-0.271057	3.64895	4.00853	0.448018	glutathione S-transferase, mu 1 [Source:MGI Symbol;Acc:MGI:95860]	Gstm1	8.92077	10.8615	8.90438	11.8867	9.9367	12.8678
ENSMUSG00000049038	-0.271057	3.64895	1.62029	0.448018	mitochondrial transcription termination factor 2 [Source:MGI Symbol;Acc:MGI:1921488]	Mterf2	8.92077	11.8489	7.91501	11.8867	8.94303	13.8576
ENSMUSG00000024276	-0.271057	3.64895	2.4499	0.448018	zinc finger protein 397 [Source:MGI Symbol;Acc:MGI:1916506]	Zfp397	10.9032	9.8741	7.91501	9.90561	10.9304	13.8576
ENSMUSG00000037017	-0.270923	5.59086	8.66669	0.115948	zinc finger and SCAN domain containing 21 [Source:MGI Symbol;Acc:MGI:99182]	Zscan21	45.595	38.509	41.5538	46.5563	54.6518	50.4812
ENSMUSG00000032400	-0.270923	5.59085	10.5793	0.115948	zwilch kinetochore protein [Source:MGI Symbol;Acc:MGI:1915264]	Zwilch	44.6038	42.4586	38.5857	47.5469	49.6835	54.4405
ENSMUSG00000037958	-0.270912	6.04489	24.2383	0.0644489	nuclear speckle regulatory protein 1 [Source:MGI Symbol;Acc:MGI:2144305]	Nsrp1	60.463	57.2698	56.3944	67.3581	70.5506	72.2574
ENSMUSG00000054604	-0.270411	6.19544	9.42603	0.051521	CGG triplet repeat binding protein 1 [Source:MGI Symbol;Acc:MGI:2146370]	Cggbp1	59.4718	70.1061	64.3094	84.1977	71.5442	78.1964
ENSMUSG00000005881	0.230408	7.38828	10.1244	0.0184995	ERGIC and golgi 3 [Source:MGI Symbol;Acc:MGI:1913616]	Ergic3	193.283	172.797	170.173	140.66	157	159.362
ENSMUSG00000041189	-0.27032	3.84397	3.7055	0.413513	cholinergic receptor, nicotinic, beta polypeptide 1 (muscle) [Source:MGI Symbol;Acc:MGI:87890]	Chrnb1	9.91196	11.8489	11.8725	15.849	12.9177	11.8779
ENSMUSG00000038822	-0.27032	3.84396	2.11389	0.413513	HECT domain and ankyrin repeat containing, E3 ubiquitin protein ligase 1 [Source:MGI Symbol;Acc:MGI:2446110]	Hace1	9.91196	13.8237	9.89376	14.8584	10.9304	14.8474
ENSMUSG00000079184	-0.270254	5.79336	4.35819	0.0917476	M-phase phosphoprotein 8 [Source:MGI Symbol;Acc:MGI:1922589]	Mphosph8	54.5158	42.4586	48.4794	51.5092	66.5759	57.41
ENSMUSG00000031349	-0.270162	7.51085	3.64702	0.103754	NAD(P) dependent steroid dehydrogenase-like [Source:MGI Symbol;Acc:MGI:1099438]	Nsdhl	137.776	178.721	174.13	231.791	177.867	182.128
ENSMUSG00000022951	-0.269635	6.01204	6.8003	0.0689114	regulator of calcineurin 1 [Source:MGI Symbol;Acc:MGI:1890564]	Rcan1	51.5422	63.1942	55.4051	74.292	61.6075	69.2879
ENSMUSG00000026626	-0.269418	5.42893	9.16136	0.140286	protein phosphatase 2, regulatory subunit B', alpha [Source:MGI Symbol;Acc:MGI:2388479]	Ppp2r5a	33.7007	38.509	39.575	48.5375	43.7215	42.5626
ENSMUSG00000034724	-0.269418	5.42892	1.71632	0.23715	CCR4-NOT transcription complex, subunit 6-like [Source:MGI Symbol;Acc:MGI:2443154]	Cnot6l	29.7359	45.4208	36.6069	54.4808	35.7721	44.5422
ENSMUSG00000003746	-0.269418	5.42893	4.82076	0.140286	mannosidase 1, alpha [Source:MGI Symbol;Acc:MGI:104677]	Man1a	39.6479	39.4964	32.6494	41.6035	41.7341	51.471
ENSMUSG00000071540	-0.269344	4.16921	4.76641	0.35521	RIKEN cDNA 3425401B19 gene [Source:MGI Symbol;Acc:MGI:3588196]	3425401B19Rik	12.8856	14.8111	15.83	19.8112	16.8924	15.8372
ENSMUSG00000034463	-0.269344	4.16921	1.17301	0.35521	scavenger receptor class A, member 3 [Source:MGI Symbol;Acc:MGI:2444418]	Scara3	17.8415	14.8111	10.8831	13.8678	15.8987	22.766
ENSMUSG00000059552	0.229586	7.85633	36.8852	0.00302274	transformation related protein 53 [Source:MGI Symbol;Acc:MGI:98834]	Trp53	251.764	240.928	251.301	208.018	217.614	208.854
ENSMUSG00000003549	-0.26914	5.54569	15.4869	0.124406	excision repair cross-complementing rodent repair deficiency, complementation group 1 [Source:MGI Symbol;Acc:MGI:95412]	Ercc1	42.6214	40.4838	38.5857	46.5563	48.6898	51.471
ENSMUSG00000018931	-0.269004	4.30791	9.85697	0.330276	N-acetyltransferase domain containing 1 [Source:MGI Symbol;Acc:MGI:1344388]	Natd1	15.8591	16.786	15.83	20.8018	17.8861	19.7966
ENSMUSG00000050195	-0.269004	4.30791	4.52744	0.330276	stearoyl-coenzyme A desaturase 4 [Source:MGI Symbol;Acc:MGI:2670997]	Scd4	16.8503	17.7734	13.8513	18.8207	17.8861	21.7762
ENSMUSG00000031862	0.228972	6.84602	16.6925	0.0379096	ATPase type 13A1 [Source:MGI Symbol;Acc:MGI:2180801]	Atp13a1	127.864	121.451	116.746	99.0561	104.335	108.881
ENSMUSG00000041124	-0.268903	5.65369	10.7861	0.110497	Myb/SANT-like DNA-binding domain containing 4 with coiled-coils [Source:MGI Symbol;Acc:MGI:1925350]	Msantd4	42.6214	47.3957	41.5538	54.4808	48.6898	55.4303
ENSMUSG00000031812	-0.268727	4.43445	6.02797	0.307618	microtubule-associated protein 1 light chain 3 beta [Source:MGI Symbol;Acc:MGI:1914693]	Map1lc3b	15.8591	18.7608	18.7981	23.7735	19.8734	20.7864
ENSMUSG00000019866	-0.268727	4.43445	10.7441	0.307618	absent in melanoma 1 [Source:MGI Symbol;Acc:MGI:109544]	Aim1	18.8327	16.786	17.8088	20.8018	22.8544	20.7864
ENSMUSG00000026819	-0.268727	4.43445	4.60312	0.307618	solute carrier family 25 (mitochondrial carrier, phosphate carrier), member 25 [Source:MGI Symbol;Acc:MGI:1915913]	Slc25a25	19.8239	17.7734	15.83	18.8207	21.8607	23.7559
ENSMUSG00000031921	-0.268608	5.8019	4.88784	0.0927302	telomeric repeat binding factor 2 [Source:MGI Symbol;Acc:MGI:1195972]	Terf2	45.595	55.2949	45.5113	63.3959	50.6772	62.3591
ENSMUSG00000037029	-0.268496	4.55077	2.68081	0.286936	zinc finger protein 146 [Source:MGI Symbol;Acc:MGI:1347092]	Zfp146	15.8591	21.723	20.7769	27.7357	20.8671	21.7762
ENSMUSG00000031433	-0.268301	4.65841	17.2062	0.267989	RNA binding motif protein 41 [Source:MGI Symbol;Acc:MGI:2444923]	Rbm41	20.8151	20.7356	21.7663	25.7546	25.8354	24.7457
ENSMUSG00000061462	0.228609	8.55832	37.2876	0.000813715	obscurin, cytoskeletal calmodulin and titin-interacting RhoGEF [Source:MGI Symbol;Acc:MGI:2681862]	Obscn	399.452	415.699	398.719	350.658	335.86	349.409
ENSMUSG00000018541	-0.26799	4.85223	3.98545	0.234532	CWC25 spliceosome-associated protein [Source:MGI Symbol;Acc:MGI:1914730]	Cwc25	20.8151	26.6601	25.7238	33.6791	26.8291	27.7152
ENSMUSG00000034135	-0.267947	6.20838	15.9895	0.0525826	SIK family kinase 3 [Source:MGI Symbol;Acc:MGI:2446296]	Sik3	62.4454	69.1187	64.3094	82.2165	73.5316	80.176
ENSMUSG00000030127	0.226841	6.75194	11.4548	0.0466379	COP9 signalosome subunit 7A [Source:MGI Symbol;Acc:MGI:1349400]	Cops7a	112.996	121.451	107.842	98.0655	91.4176	102.942
ENSMUSG00000053253	-0.267864	4.94019	12.2423	0.219713	Nedd4 family interacting protein 2 [Source:MGI Symbol;Acc:MGI:1923523]	Ndfip2	25.7711	24.6852	27.7025	31.6979	32.7911	29.6948
ENSMUSG00000032370	-0.267752	5.02308	10.2387	0.205999	lactamase, beta [Source:MGI Symbol;Acc:MGI:1933395]	Lactb	25.7711	27.6475	29.6813	35.6602	32.7911	31.6745
ENSMUSG00000022747	-0.267653	5.10145	1.21048	0.312584	ST3 beta-galactoside alpha-2,3-sialyltransferase 6 [Source:MGI Symbol;Acc:MGI:1888707]	St3gal6	21.8063	35.5467	30.6707	45.5658	27.8228	32.6643
ENSMUSG00000005893	-0.267653	5.10146	3.25927	0.193285	nuclear receptor subfamily 2, group C, member 2 [Source:MGI Symbol;Acc:MGI:1352466]	Nr2c2	24.7799	31.5971	31.66	41.6035	31.7974	32.6643
ENSMUSG00000037361	-0.267653	6.43717	1.5407	0.259934	splicing factor 3B, subunit 6 [Source:MGI Symbol;Acc:MGI:1913305]	Sf3b6	61.4542	95.7787	73.2138	111.933	71.5442	94.0336
ENSMUSG00000026341	0.22662	7.66897	30.8251	0.00611179	ARP3 actin-related protein 3 [Source:MGI Symbol;Acc:MGI:1921367]	Actr3	223.019	210.318	218.652	181.273	191.778	184.108
ENSMUSG00000029729	-0.267565	5.17582	10.1465	0.181477	zinc finger with KRAB and SCAN domains 1 [Source:MGI Symbol;Acc:MGI:1921820]	Zkscan1	29.7359	29.6223	33.6388	38.6319	38.7531	34.644
ENSMUSG00000021460	-0.267565	5.17581	23.1224	0.181477	AU RNA binding protein/enoyl-coenzyme A hydratase [Source:MGI Symbol;Acc:MGI:1338011]	Auh	30.7271	31.5971	30.6707	37.6413	36.7658	37.6134
ENSMUSG00000032648	0.224952	8.68755	46.6017	0.000443981	muscle glycogen phosphorylase [Source:MGI Symbol;Acc:MGI:97830]	Pygm	450.003	438.41	438.294	372.451	381.569	381.084
ENSMUSG00000049792	-0.267348	5.37831	5.02636	0.150741	BCL2-associated athanogene 5 [Source:MGI Symbol;Acc:MGI:1917619]	Bag5	33.7007	33.5719	40.5644	45.5658	46.7025	37.6134
ENSMUSG00000035293	-0.267348	5.37831	17.8815	0.150741	G2/M-phase specific E3 ubiquitin ligase [Source:MGI Symbol;Acc:MGI:2444298]	G2e3	37.6655	35.5467	34.6282	41.6035	43.7215	44.5422
ENSMUSG00000024072	-0.265464	6.03403	9.16423	0.0710678	Yip1 domain family, member 4 [Source:MGI Symbol;Acc:MGI:1915114]	Yipf4	54.5158	55.2949	63.3201	73.3015	71.5442	63.349
ENSMUSG00000026110	-0.265257	5.56594	14.3484	0.127124	mannoside acetylglucosaminyltransferase 4, isoenzyme A [Source:MGI Symbol;Acc:MGI:2662992]	Mgat4a	40.6391	39.4964	43.5325	50.5186	51.6708	46.5219
ENSMUSG00000038446	-0.265194	5.45087	11.3288	0.1434	cell division cycle 40 [Source:MGI Symbol;Acc:MGI:1918963]	Cdc40	37.6655	40.4838	35.6175	45.5658	42.7278	48.5016
ENSMUSG00000034109	-0.265158	5.38971	7.82439	0.152406	golgi integral membrane protein 4 [Source:MGI Symbol;Acc:MGI:1920374]	Golim4	32.7095	37.5216	38.5857	47.5469	42.7278	40.5829
ENSMUSG00000029920	-0.264975	5.11527	18.7936	0.195505	SWI/SNF-related, matrix-associated actin-dependent regulator of chromatin, subfamily a, containing DEAD/H box 1 [Source:MGI Symbol;Acc:MGI:95453]	Smarcad1	29.7359	30.6097	28.6919	35.6602	34.7784	36.6236
ENSMUSG00000021485	-0.264916	5.03765	19.4449	0.208394	Max dimerization protein 3 [Source:MGI Symbol;Acc:MGI:104987]	Mxd3	27.7535	28.6349	27.7025	34.6696	32.7911	33.6541
ENSMUSG00000022960	-0.264916	5.03765	18.9714	0.208394	downstream neighbor of SON [Source:MGI Symbol;Acc:MGI:1890621]	Donson	28.7447	27.6475	27.7025	32.6885	33.7848	34.644
ENSMUSG00000029718	0.224425	9.82437	15.1982	0.00767938	procollagen C-endopeptidase enhancer protein [Source:MGI Symbol;Acc:MGI:105099]	Pcolce	1033.82	951.863	938.918	786.505	853.562	863.13
ENSMUSG00000022009	-0.264849	4.95561	1.91366	0.222301	nuclear fragile X mental retardation protein interacting protein 1 [Source:MGI Symbol;Acc:MGI:1351474]	Nufip1	20.8151	30.6097	27.7025	38.6319	26.8291	29.6948
ENSMUSG00000028542	-0.264774	4.86864	6.30001	0.237333	solute carrier family 6 (neurotransmitter transporter, glycine), member 9 [Source:MGI Symbol;Acc:MGI:95760]	Slc6a9	24.7799	22.7104	26.7132	29.7168	32.7911	26.7253
ENSMUSG00000028572	-0.264774	4.86863	15.5616	0.237333	hook microtubule tethering protein 1 [Source:MGI Symbol;Acc:MGI:1925213]	Hook1	23.7887	24.6852	25.7238	30.7074	29.8101	28.705
ENSMUSG00000021365	-0.264774	4.86863	1.62534	0.24857	neural precursor cell expressed, developmentally down-regulated gene 9 [Source:MGI Symbol;Acc:MGI:97302]	Nedd9	29.7359	24.6852	19.7875	23.7735	28.8164	36.6236
ENSMUSG00000031641	-0.264688	4.77606	9.3537	0.253616	carbonyl reductase 4 [Source:MGI Symbol;Acc:MGI:2384567]	Cbr4	21.8063	24.6852	22.7556	29.7168	25.8354	27.7152
ENSMUSG00000030824	0.223866	8.86706	13.2859	0.0103874	nucleobindin 1 [Source:MGI Symbol;Acc:MGI:97388]	Nucb1	529.299	501.604	471.932	406.13	427.278	453.341
ENSMUSG00000034867	-0.264473	4.57095	6.10045	0.290546	ankyrin repeat domain 27 (VPS9 domain) [Source:MGI Symbol;Acc:MGI:2444103]	Ankrd27	19.8239	17.7734	21.7663	23.7735	25.8354	21.7762
ENSMUSG00000019897	-0.264473	4.57095	12.5546	0.290546	coiled-coil domain containing 59 [Source:MGI Symbol;Acc:MGI:1289302]	Ccdc59	18.8327	19.7482	20.7769	24.764	23.8481	22.766
ENSMUSG00000028331	-0.264473	4.57095	4.11204	0.290546	tRNA methyltransferase O [Source:MGI Symbol;Acc:MGI:1922003]	Trmo	22.7975	18.7608	17.8088	20.8018	24.8417	25.7355
ENSMUSG00000021066	-0.264337	4.45631	2.69145	0.311572	atlastin GTPase 1 [Source:MGI Symbol;Acc:MGI:1921241]	Atl1	19.8239	19.7482	14.8406	19.8112	19.8734	25.7355
ENSMUSG00000031984	-0.264337	6.22758	23.2124	0.0541809	RIKEN cDNA 2810004N23 gene [Source:MGI Symbol;Acc:MGI:1913773]	2810004N23Rik	63.4366	68.1313	67.2776	83.2071	77.5062	78.1964
ENSMUSG00000022114	-0.264173	4.33177	2.36022	0.334627	sprouty homolog 2 (Drosophila) [Source:MGI Symbol;Acc:MGI:1345138]	Spry2	16.8503	13.8237	18.7981	18.8207	23.8481	16.8271
ENSMUSG00000045160	-0.264173	4.33176	2.06616	0.334627	bolA-like 3 (E. coli) [Source:MGI Symbol;Acc:MGI:1925903]	Bola3	17.8415	18.7608	12.8619	17.8301	17.8861	23.7559
ENSMUSG00000018707	0.223645	9.62832	8.61542	0.0254855	dynein cytoplasmic 1 heavy chain 1 [Source:MGI Symbol;Acc:MGI:103147]	Dync1h1	835.579	796.84	919.13	739.949	775.062	670.113
ENSMUSG00000027654	0.223571	8.46644	10.1986	0.0182261	family with sequence similarity 83, member D [Source:MGI Symbol;Acc:MGI:1919128]	Fam83d	405.399	354.48	376.952	303.112	345.797	324.663
ENSMUSG00000055371	-0.263792	5.8273	7.36374	0.095673	signal transducing adaptor molecule (SH3 domain and ITAM motif) 2 [Source:MGI Symbol;Acc:MGI:1929100]	Stam2	45.595	49.3705	54.4157	65.377	59.6202	54.4405
ENSMUSG00000064368	-0.263724	4.04488	13.7279	0.388151	mitochondrially encoded NADH dehydrogenase 6 [Source:MGI Symbol;Acc:MGI:102495]	mt-Nd6	12.8856	12.8363	13.8513	15.849	15.8987	15.8372
ENSMUSG00000070327	0.222849	8.40943	26.5709	0.00197849	ring finger protein 213 [Source:MGI Symbol;Acc:MGI:1289196]	Rnf213	372.69	350.53	369.037	305.093	323.936	306.847
ENSMUSG00000047221	-0.263404	3.87676	6.31396	0.419528	family with sequence similarity 185, member A [Source:MGI Symbol;Acc:MGI:2140983]	Fam185a	10.9032	10.8615	12.8619	13.8678	14.905	12.8678
ENSMUSG00000026112	-0.263404	3.87676	2.56356	0.419528	cytochrome C oxidase assembly factor 5 [Source:MGI Symbol;Acc:MGI:1923428]	Coa5	9.91196	10.8615	13.8513	15.849	13.9114	11.8779
ENSMUSG00000020134	-0.263404	3.87675	1.26914	0.419528	pellino 1 [Source:MGI Symbol;Acc:MGI:1914495]	Peli1	8.92077	13.8237	11.8725	17.8301	10.9304	12.8678
ENSMUSG00000030960	-0.263404	3.87676	8.92312	0.419528	methyltransferase like 10 [Source:MGI Symbol;Acc:MGI:1919346]	Mettl10	10.9032	11.8489	11.8725	14.8584	12.9177	13.8576
ENSMUSG00000031820	-0.263249	5.51997	8.3006	0.136435	BRISC and BRCA1 A complex member 1 [Source:MGI Symbol;Acc:MGI:1915501]	Babam1	36.6743	40.4838	42.5432	52.4997	46.7025	44.5422
ENSMUSG00000047888	-0.263212	6.75857	5.16515	0.0625409	trinucleotide repeat containing 6b [Source:MGI Symbol;Acc:MGI:2443730]	Tnrc6b	84.2517	104.665	100.916	131.745	106.323	109.871
ENSMUSG00000002109	-0.262979	3.68642	2.62913	0.454847	damage specific DNA binding protein 2 [Source:MGI Symbol;Acc:MGI:1355314]	Ddb2	8.92077	11.8489	8.90438	12.8773	9.9367	12.8678
ENSMUSG00000006800	0.222707	8.37396	42.4638	0.00057263	sulfatase 2 [Source:MGI Symbol;Acc:MGI:1919293]	Sulf2	348.901	361.392	355.186	310.045	299.095	303.877
ENSMUSG00000061981	0.222544	6.80615	9.06881	0.0466334	flotillin 2 [Source:MGI Symbol;Acc:MGI:103309]	Flot2	125.882	119.477	109.821	95.0938	100.361	108.881
ENSMUSG00000030512	-0.262774	6.55076	2.97359	0.134381	small nuclear ribonucleoprotein polypeptide A' [Source:MGI Symbol;Acc:MGI:1916231]	Snrpa1	71.3661	96.7661	82.1182	115.896	84.4619	99.9726
ENSMUSG00000005886	-0.262457	5.92459	4.64712	0.0860854	nuclear receptor coactivator 2 [Source:MGI Symbol;Acc:MGI:1276533]	Ncoa2	46.5862	54.3075	59.3626	72.3109	62.6012	57.41
ENSMUSG00000001288	-0.262386	3.46712	2.51831	0.495086	retinoic acid receptor, gamma [Source:MGI Symbol;Acc:MGI:97858]	Rarg	8.92077	6.91187	8.90438	8.91505	11.924	8.90845
ENSMUSG00000045409	-0.262386	3.46712	0.386066	0.556776	tripartite motif-containing 39 [Source:MGI Symbol;Acc:MGI:1890659]	Trim39	11.8944	4.93705	7.91501	5.94336	14.905	8.90845
ENSMUSG00000038451	-0.262386	3.46711	5.84992	0.495086	splA/ryanodine receptor domain and SOCS box containing 2 [Source:MGI Symbol;Acc:MGI:1315199]	Spsb2	8.92077	7.89928	7.91501	8.91505	10.9304	9.89828
ENSMUSG00000029832	-0.262386	3.46711	10.2891	0.495086	nuclear factor, erythroid derived 2, like 3 [Source:MGI Symbol;Acc:MGI:1339958]	Nfe2l3	7.92957	7.89928	8.90438	9.90561	9.9367	9.89828
ENSMUSG00000047910	-0.262386	3.46712	0.973334	0.495086	protocadherin beta 16 [Source:MGI Symbol;Acc:MGI:2136752]	Pcdhb16	10.9032	6.91187	6.92563	6.93392	11.924	10.8881
ENSMUSG00000043602	-0.262386	3.46711	1.86057	0.495086	zinc finger protein 3 [Source:MGI Symbol;Acc:MGI:99177]	Zfp3	7.92957	9.8741	6.92563	9.90561	7.94936	11.8779
ENSMUSG00000067365	-0.26235	5.12895	15.7318	0.19771	transmembrane protein 128 [Source:MGI Symbol;Acc:MGI:1913559]	Tmem128	28.7447	30.6097	30.6707	37.6413	35.7721	34.644
ENSMUSG00000009418	0.222518	7.32729	12.4424	0.0168985	neuron navigator 1 [Source:MGI Symbol;Acc:MGI:2183683]	Nav1	160.574	171.809	180.066	155.518	145.076	138.576
ENSMUSG00000020719	-0.261747	8.63224	4.51812	0.07674	DEAD (Asp-Glu-Ala-Asp) box polypeptide 5 [Source:MGI Symbol;Acc:MGI:105037]	Ddx5	309.253	386.077	381.899	495.28	396.474	399.89
ENSMUSG00000024308	0.220627	7.81991	17.3677	0.00563387	TAP binding protein [Source:MGI Symbol;Acc:MGI:1201689]	Tapbp	237.887	232.041	253.28	209.999	214.633	195.986
ENSMUSG00000034532	-0.261502	3.20838	0.928461	0.541719	F-box protein 16 [Source:MGI Symbol;Acc:MGI:1354706]	Fbxo16	5.94718	4.93705	8.90438	7.92448	9.9367	5.93897
ENSMUSG00000075271	-0.261502	3.20838	8.65308	0.541719	tetratricopeptide repeat domain 30A1 [Source:MGI Symbol;Acc:MGI:1926052]	Ttc30a1	5.94718	6.91187	6.92563	7.92448	7.94936	7.91862
ENSMUSG00000046079	-0.261502	3.20838	4.41657	0.541719	leucine rich repeat containing 8D [Source:MGI Symbol;Acc:MGI:1922368]	Lrrc8d	6.93837	6.91187	5.93626	6.93392	7.94936	8.90845
ENSMUSG00000021665	-0.261422	6.05567	30.3234	0.0732269	hexosaminidase B [Source:MGI Symbol;Acc:MGI:96074]	Hexb	59.4718	59.2446	57.3838	69.3392	69.5569	72.2574
ENSMUSG00000054808	0.218797	10.0881	28.5493	0.00164486	actinin alpha 4 [Source:MGI Symbol;Acc:MGI:1890773]	Actn4	1186.46	1130.58	1189.23	989.57	1038.38	984.878
ENSMUSG00000010911	-0.261331	4.79334	10.6761	0.256622	APAF1 interacting protein [Source:MGI Symbol;Acc:MGI:1926788]	Apip	21.8063	24.6852	23.745	29.7168	26.8291	27.7152
ENSMUSG00000001517	-0.261302	5.53031	6.06267	0.137878	forkhead box M1 [Source:MGI Symbol;Acc:MGI:1347487]	Foxm1	35.6831	41.4712	43.5325	53.4903	46.7025	44.5422
ENSMUSG00000037152	0.217837	7.64893	8.54903	0.0258686	NADH dehydrogenase (ubiquinone) 1, subcomplex unknown, 1 [Source:MGI Symbol;Acc:MGI:1913627]	Ndufc1	227.975	215.255	197.875	171.367	181.842	197.966
ENSMUSG00000020899	0.217292	7.53929	17.027	0.0119824	phosphoribosylformylglycinamidine synthase (FGAR amidotransferase) [Source:MGI Symbol;Acc:MGI:2684864]	Pfas	201.213	187.608	204.801	167.405	178.861	164.311
ENSMUSG00000039891	-0.260571	4.59084	1.80949	0.294103	taxilin beta [Source:MGI Symbol;Acc:MGI:2671945]	Txlnb	15.8591	22.7104	21.7663	29.7168	20.8671	21.7762
ENSMUSG00000026914	-0.260262	6.10146	6.7102	0.069864	proteasome (prosome, macropain) 26S subunit, non-ATPase, 14 [Source:MGI Symbol;Acc:MGI:1913284]	Psmd14	55.507	67.1439	59.3626	79.2448	65.5822	73.2472
ENSMUSG00000000167	-0.260042	2.89288	1.97307	0.597178	PIH1 domain containing 2 [Source:MGI Symbol;Acc:MGI:1919864]	Pih1d2	3.96479	4.93705	5.93626	6.93392	5.96202	4.94914
ENSMUSG00000064363	-0.260042	2.89288	1.94188	0.597178	mitochondrially encoded NADH dehydrogenase 4 [Source:MGI Symbol;Acc:MGI:102498]	mt-Nd4	4.95598	3.94964	5.93626	5.94336	6.95569	4.94914
ENSMUSG00000030741	-0.260042	2.89287	2.00012	0.597178	spinster homolog 1 [Source:MGI Symbol;Acc:MGI:1920908]	Spns1	3.96479	5.92446	4.94688	6.93392	4.96835	5.93897
ENSMUSG00000033126	-0.260042	2.89287	2.00012	0.597178	ybeY metallopeptidase [Source:MGI Symbol;Acc:MGI:2656825]	Ybey	3.96479	5.92446	4.94688	6.93392	4.96835	5.93897
ENSMUSG00000046731	-0.260042	2.89287	2.00012	0.597178	potassium channel tetramerisation domain containing 11 [Source:MGI Symbol;Acc:MGI:2448712]	Kctd11	3.96479	5.92446	4.94688	6.93392	4.96835	5.93897
ENSMUSG00000058046	-0.260042	2.89288	12.9976	0.597178	RIKEN cDNA 4933430I17 gene [Source:MGI Symbol;Acc:MGI:3045314]	4933430I17Rik	4.95598	4.93705	4.94688	5.94336	5.96202	5.93897
ENSMUSG00000020178	-0.260042	2.89288	1.93705	0.597178	adenosine A2a receptor [Source:MGI Symbol;Acc:MGI:99402]	Adora2a	5.94718	3.94964	4.94688	4.9528	6.95569	5.93897
ENSMUSG00000037363	-0.260042	2.89288	1.93705	0.597178	leucine zipper-EF-hand containing transmembrane protein 2 [Source:MGI Symbol;Acc:MGI:2444979]	Letm2	5.94718	3.94964	4.94688	4.9528	6.95569	5.93897
ENSMUSG00000030844	-0.260042	2.89287	1.995	0.597178	regulator of G-protein signalling 10 [Source:MGI Symbol;Acc:MGI:1915115]	Rgs10	4.95598	5.92446	3.9575	5.94336	4.96835	6.92879
ENSMUSG00000022948	-0.260042	2.89288	1.96312	0.597178	SET domain containing 4 [Source:MGI Symbol;Acc:MGI:2136890]	Setd4	5.94718	4.93705	3.9575	4.9528	5.96202	6.92879
ENSMUSG00000034825	-0.260042	2.89288	1.96312	0.597178	nuclear receptor interacting protein 3 [Source:MGI Symbol;Acc:MGI:1925843]	Nrip3	5.94718	4.93705	3.9575	4.9528	5.96202	6.92879
ENSMUSG00000041035	-0.259515	4.35522	8.08163	0.338894	predicted gene 17018 [Source:MGI Symbol;Acc:MGI:4820566]	Gm17018	16.8503	15.7986	17.8088	19.8112	21.8607	18.8067
ENSMUSG00000021000	-0.259515	4.35523	4.53197	0.338894	melanoma inhibitory activity 2 [Source:MGI Symbol;Acc:MGI:2159614]	Mia2	17.8415	14.8111	17.8088	18.8207	22.8544	18.8067
ENSMUSG00000027384	-0.259422	5.06636	4.05353	0.213128	NADH dehydrogenase (ubiquinone) complex I, assembly factor 5 [Source:MGI Symbol;Acc:MGI:1916737]	Ndufaf5	25.7711	27.6475	32.6494	37.6413	35.7721	29.6948
ENSMUSG00000020074	-0.258986	7.49906	2.62068	0.155594	cell division cycle and apoptosis regulator 1 [Source:MGI Symbol;Acc:MGI:1914750]	Ccar1	133.812	171.809	183.035	232.782	181.842	170.25
ENSMUSG00000090626	-0.258815	4.22121	2.57804	0.364727	testis expressed gene 9 [Source:MGI Symbol;Acc:MGI:1201610]	Tex9	17.8415	13.8237	13.8513	14.8584	19.8734	19.7966
ENSMUSG00000041020	-0.2588	5.4234	5.8067	0.157359	MAP7 domain containing 2 [Source:MGI Symbol;Acc:MGI:1917474]	Map7d2	35.6831	34.5593	41.5538	46.5563	47.6961	39.5931
ENSMUSG00000003604	-0.258572	4.90088	3.09169	0.242852	apoptosis, caspase activation inhibitor [Source:MGI Symbol;Acc:MGI:1921518]	Aven	29.7359	22.7104	23.745	25.7546	33.7848	31.6745
ENSMUSG00000004285	-0.258467	5.36102	3.67905	0.167365	ATPase, H+ transporting, lysosomal V1 subunit F [Source:MGI Symbol;Acc:MGI:1913394]	Atp6v1f	30.7271	38.509	37.5963	49.528	38.7531	39.5931
ENSMUSG00000041548	0.216493	7.87369	10.8186	0.0161379	heat shock protein 8 [Source:MGI Symbol;Acc:MGI:2135756]	Hspb8	263.658	252.777	233.493	203.065	212.645	229.64
ENSMUSG00000024283	-0.258103	5.29584	4.65051	0.178106	WW domain containing adaptor with coiled-coil [Source:MGI Symbol;Acc:MGI:2387357]	Wac	34.6919	37.5216	29.6813	39.6224	36.7658	45.5321
ENSMUSG00000030265	-0.258058	4.81042	7.33391	0.259593	Kirsten rat sarcoma viral oncogene homolog [Source:MGI Symbol;Acc:MGI:96680]	Kras	25.7711	21.723	23.745	26.7451	30.8038	27.7152
ENSMUSG00000002416	0.211232	7.45631	6.74332	0.040075	NADH dehydrogenase (ubiquinone) 1 beta subcomplex, 2 [Source:MGI Symbol;Acc:MGI:1915448]	Ndufb2	202.204	172.797	184.024	147.594	172.899	162.332
ENSMUSG00000034377	-0.257947	4.07345	3.06559	0.393369	tubby like protein 4 [Source:MGI Symbol;Acc:MGI:1916092]	Tulp4	11.8944	12.8363	15.83	17.8301	16.8924	13.8576
ENSMUSG00000050079	-0.257947	4.07345	3.13666	0.393369	ring finger and SPRY domain containing 1 [Source:MGI Symbol;Acc:MGI:1914860]	Rspry1	12.8856	15.7986	11.8725	16.8395	13.9114	17.8169
ENSMUSG00000026821	-0.257169	2.48849	3.96943	0.666114	ral guanine nucleotide dissociation stimulator [Source:MGI Symbol;Acc:MGI:107485]	Ralgds	2.97359	3.94964	2.96813	3.96224	3.97468	3.95931
ENSMUSG00000041420	-0.257169	2.48849	3.96943	0.666114	Meis homeobox 3 [Source:MGI Symbol;Acc:MGI:108519]	Meis3	2.97359	3.94964	2.96813	3.96224	3.97468	3.95931
ENSMUSG00000044795	-0.257169	2.48849	1.41395	0.666114	cytochrome b5 domain containing 1 [Source:MGI Symbol;Acc:MGI:2685586]	Cyb5d1	3.96479	2.96223	2.96813	2.97168	4.96835	3.95931
ENSMUSG00000042682	-0.257169	2.48849	1.42895	0.666114	selenoprotein K [Source:MGI Symbol;Acc:MGI:1931466]	Selenok	2.97359	2.96223	3.9575	4.9528	3.97468	2.96948
ENSMUSG00000002908	-0.257169	2.48849	3.91521	0.666114	potassium intermediate/small conductance calcium-activated channel, subfamily N, member 1 [Source:MGI Symbol;Acc:MGI:1933993]	Kcnn1	2.97359	2.96223	3.9575	3.96224	3.97468	3.95931
ENSMUSG00000030757	-0.257169	2.48848	1.45026	0.666114	zinc finger with KRAB and SCAN domains 2 [Source:MGI Symbol;Acc:MGI:2444060]	Zkscan2	2.97359	3.94964	2.96813	4.9528	2.98101	3.95931
ENSMUSG00000037727	-0.257169	2.48848	1.45026	0.666114	arginine vasopressin [Source:MGI Symbol;Acc:MGI:88121]	Avp	2.97359	3.94964	2.96813	4.9528	2.98101	3.95931
ENSMUSG00000049555	-0.257169	2.48849	3.86641	0.666114	transmembrane inner ear [Source:MGI Symbol;Acc:MGI:2159400]	Tmie	3.96479	2.96223	2.96813	3.96224	3.97468	3.95931
ENSMUSG00000096433	-0.257169	2.48849	3.86641	0.666114	zinc finger protein 994 [Source:MGI Symbol;Acc:MGI:3643318]	Zfp994	3.96479	2.96223	2.96813	3.96224	3.97468	3.95931
ENSMUSG00000024180	-0.257169	2.48848	1.45299	0.666114	transmembrane protein 8 (five membrane-spanning domains) [Source:MGI Symbol;Acc:MGI:1926283]	Tmem8	2.97359	3.94964	2.96813	3.96224	2.98101	4.94914
ENSMUSG00000046519	-0.257136	5.49379	14.4293	0.149558	golgi phosphoprotein 3-like [Source:MGI Symbol;Acc:MGI:1917129]	Golph3l	37.6655	38.509	41.5538	48.5375	47.6961	44.5422
ENSMUSG00000018986	-0.256838	3.90882	1.4088	0.425359	schlafen 3 [Source:MGI Symbol;Acc:MGI:1329005]	Slfn3	10.9032	9.8741	14.8406	14.8584	16.8924	10.8881
ENSMUSG00000040520	-0.256838	3.90882	6.27776	0.425359	mannosidase, endo-alpha [Source:MGI Symbol;Acc:MGI:2444484]	Manea	10.9032	11.8489	12.8619	14.8584	14.905	12.8678
ENSMUSG00000021838	-0.256838	3.90882	5.07233	0.425359	sterile alpha motif domain containing 4 [Source:MGI Symbol;Acc:MGI:1921730]	Samd4	11.8944	10.8615	12.8619	13.8678	15.8987	12.8678
ENSMUSG00000032567	-0.256838	3.90882	8.19141	0.425359	asteroid homolog 1 (Drosophila) [Source:MGI Symbol;Acc:MGI:1913845]	Aste1	12.8856	11.8489	10.8831	13.8678	13.9114	14.8474
ENSMUSG00000059975	-0.256838	3.90882	2.18327	0.425359	zinc finger protein 74 [Source:MGI Symbol;Acc:MGI:107784]	Zfp74	11.8944	13.8237	9.89376	13.8678	11.924	16.8271
ENSMUSG00000032846	-0.256838	3.90881	0.830547	0.425359	zinc finger SWIM-type containing 6 [Source:MGI Symbol;Acc:MGI:1914513]	Zswim6	10.9032	15.7986	8.90438	14.8584	9.9367	17.8169
ENSMUSG00000027365	-0.256761	5.0805	4.58836	0.215466	transient receptor potential cation channel, subfamily M, member 7 [Source:MGI Symbol;Acc:MGI:1929996]	Trpm7	25.7711	30.6097	30.6707	39.6224	32.7911	31.6745
ENSMUSG00000022364	-0.256761	5.08051	8.09215	0.215466	TBC1 domain family, member 31 [Source:MGI Symbol;Acc:MGI:2684931]	Tbc1d31	30.7271	26.6601	29.6813	32.6885	37.7595	33.6541
ENSMUSG00000019820	0.211218	7.59575	22.4533	0.012724	utrophin [Source:MGI Symbol;Acc:MGI:104631]	Utrn	198.239	206.369	211.726	184.244	176.873	171.24
ENSMUSG00000032249	-0.256319	7.46848	5.27735	0.0604489	acidic (leucine-rich) nuclear phosphoprotein 32 family, member A [Source:MGI Symbol;Acc:MGI:108447]	Anp32a	175.442	162.923	140.491	172.358	184.823	214.793
ENSMUSG00000048327	-0.256283	6.27139	7.25186	0.0579344	cytoskeleton associated protein 2-like [Source:MGI Symbol;Acc:MGI:1917716]	Ckap2l	62.4454	75.0431	68.2669	89.1505	74.5252	82.1557
ENSMUSG00000028868	-0.256142	5.86864	5.69369	0.100559	WAS protein family, member 2 [Source:MGI Symbol;Acc:MGI:1098641]	Wasf2	49.5598	47.3957	57.3838	63.3959	66.5759	54.4405
ENSMUSG00000033964	-0.255979	4.49905	2.57586	0.319284	zinc finger and BTB domain containing 41 [Source:MGI Symbol;Acc:MGI:2444487]	Zbtb41	15.8591	21.723	18.7981	25.7546	18.8797	22.766
ENSMUSG00000043153	-0.255979	4.49906	5.22764	0.319284	isoprenoid synthase domain containing [Source:MGI Symbol;Acc:MGI:1923097]	Ispd	20.8151	17.7734	17.8088	19.8112	23.8481	23.7559
ENSMUSG00000035916	-0.255467	5.77605	2.17106	0.190071	protein tyrosine phosphatase, receptor type, Q [Source:MGI Symbol;Acc:MGI:1096349]	Ptprq	39.6479	55.2949	49.4688	69.3392	48.6898	54.4405
ENSMUSG00000055675	-0.255376	3.72296	0.882923	0.461423	kelch repeat and BTB (POZ) domain containing 11 [Source:MGI Symbol;Acc:MGI:1922151]	Kbtbd11	13.8767	7.89928	8.90438	8.91505	14.905	12.8678
ENSMUSG00000040785	-0.255098	7.29584	2.02573	0.203533	tetratricopeptide repeat domain 3 [Source:MGI Symbol;Acc:MGI:1276539]	Ttc3	113.988	147.124	163.247	205.046	158.987	142.535
ENSMUSG00000029787	-0.25502	4.37831	1.46761	0.34308	AVL9 homolog (S. cerevisiase) [Source:MGI Symbol;Acc:MGI:1926187]	Avl9	13.8767	16.786	20.7769	24.764	20.8671	15.8372
ENSMUSG00000039738	-0.25502	4.37831	2.42514	0.34308	SLX4 structure-specific endonuclease subunit homolog (S. cerevisiae) [Source:MGI Symbol;Acc:MGI:106299]	Slx4	14.8679	16.786	19.7875	23.7735	20.8671	16.8271
ENSMUSG00000023079	-0.25502	4.37831	1.43421	0.34308	general transcription factor II I repeat domain-containing 1 [Source:MGI Symbol;Acc:MGI:1861942]	Gtf2ird1	21.8063	14.8111	14.8406	15.849	22.8544	22.766
ENSMUSG00000051864	-0.254868	4.82728	3.66821	0.262531	TBC1 domain family, member 22a [Source:MGI Symbol;Acc:MGI:1289265]	Tbc1d22a	22.7975	27.6475	21.7663	29.7168	24.8417	31.6745
ENSMUSG00000026131	0.210709	8.27597	8.06074	0.0289373	dystonin [Source:MGI Symbol;Acc:MGI:104627]	Dst	308.262	327.82	355.186	305.093	287.171	264.284
ENSMUSG00000024319	0.209497	6.94405	6.1602	0.0492534	VPS52 GARP complex subunit [Source:MGI Symbol;Acc:MGI:1330304]	Vps52	141.741	126.388	121.693	102.028	115.266	119.769
ENSMUSG00000024350	-0.254154	5.09452	3.7546	0.217786	DnaJ heat shock protein family (Hsp40) member C18 [Source:MGI Symbol;Acc:MGI:1923844]	Dnajc18	33.7007	28.6349	25.7238	30.7074	35.7721	38.6033
ENSMUSG00000028252	-0.253858	4.24652	4.49477	0.369329	cyclin C [Source:MGI Symbol;Acc:MGI:1858199]	Ccnc	15.8591	13.8237	16.8194	17.8301	20.8671	16.8271
ENSMUSG00000032905	-0.253858	4.24652	2.28217	0.369329	autophagy related 12 [Source:MGI Symbol;Acc:MGI:1914776]	Atg12	17.8415	12.8363	15.83	15.849	21.8607	17.8169
ENSMUSG00000022895	-0.253657	5.31988	4.91673	0.181847	E26 avian leukemia oncogene 2, 3' domain [Source:MGI Symbol;Acc:MGI:95456]	Ets2	30.7271	37.5216	35.6175	46.5563	37.7595	39.5931
ENSMUSG00000006586	-0.25345	5.01574	4.02343	0.232423	runt-related transcription factor 1; translocated to, 1 (cyclin D-related) [Source:MGI Symbol;Acc:MGI:104793]	Runx1t1	31.7183	25.6726	25.7238	28.7263	34.7784	35.6338
ENSMUSG00000041530	-0.25345	5.01573	3.89792	0.232423	argonaute RISC catalytic subunit 1 [Source:MGI Symbol;Acc:MGI:2446630]	Ago1	29.7359	29.6223	23.745	30.7074	30.8038	37.6134
ENSMUSG00000044702	-0.253356	3.50955	7.77539	0.502599	partner and localizer of BRCA2 [Source:MGI Symbol;Acc:MGI:3040695]	Palb2	8.92077	7.89928	8.90438	9.90561	10.9304	9.89828
ENSMUSG00000002603	-0.253356	3.50955	3.66373	0.502599	transforming growth factor, beta 1 [Source:MGI Symbol;Acc:MGI:98725]	Tgfb1	7.92957	9.8741	7.91501	10.8962	8.94303	10.8881
ENSMUSG00000028078	-0.253356	3.50955	0.80445	0.502599	doublecortin-like kinase 2 [Source:MGI Symbol;Acc:MGI:1918012]	Dclk2	9.91196	9.8741	5.93626	7.92448	8.94303	13.8576
ENSMUSG00000073725	-0.253291	5.51477	6.42397	0.152602	LMBR1 domain containing 1 [Source:MGI Symbol;Acc:MGI:1915671]	Lmbrd1	35.6831	41.4712	42.5432	52.4997	45.7088	44.5422
ENSMUSG00000023186	-0.253279	7.85019	5.41578	0.057996	von Willebrand factor A domain containing 5A [Source:MGI Symbol;Acc:MGI:1915026]	Vwa5a	184.363	214.268	227.556	280.329	240.468	225.681
ENSMUSG00000025200	-0.253106	4.62984	1.86421	0.301063	CWF19-like 1, cell cycle control (S. pombe) [Source:MGI Symbol;Acc:MGI:1919752]	Cwf19l1	20.8151	24.6852	16.8194	23.7735	20.8671	29.6948
ENSMUSG00000029599	0.209402	7.09449	15.3556	0.0382489	DEAD (Asp-Glu-Ala-Asp) box polypeptide 54 [Source:MGI Symbol;Acc:MGI:1919240]	Ddx54	150.662	145.149	137.523	119.858	124.209	130.657
ENSMUSG00000020166	-0.25301	5.68641	2.17031	0.190136	CCR4-NOT transcription complex, subunit 2 [Source:MGI Symbol;Acc:MGI:1919318]	Cnot2	37.6655	53.3201	44.5219	63.3959	44.7151	53.4507
ENSMUSG00000007833	0.208953	7.43444	9.18203	0.0225051	aldehyde dehydrogenase 16 family, member A1 [Source:MGI Symbol;Acc:MGI:1916998]	Aldh16a1	197.248	173.784	179.077	147.594	166.937	161.342
ENSMUSG00000063550	-0.252635	7.78039	2.96203	0.135011	nucleoporin 98 [Source:MGI Symbol;Acc:MGI:109404]	Nup98	166.521	221.18	208.758	279.338	209.664	221.721
ENSMUSG00000017774	0.208813	9.14246	31.3411	0.00129008	myosin IC [Source:MGI Symbol;Acc:MGI:106612]	Myo1c	620.489	595.408	595.604	509.148	529.626	528.568
ENSMUSG00000024472	-0.25242	4.10147	1.22264	0.398455	decapping mRNA 2 [Source:MGI Symbol;Acc:MGI:1917890]	Dcp2	13.8767	10.8615	16.8194	15.849	20.8671	12.8678
ENSMUSG00000028128	-0.252359	5.18239	5.75805	0.206377	coagulation factor III [Source:MGI Symbol;Acc:MGI:88381]	F3	34.6919	30.6097	28.6919	33.6791	37.7595	40.5829
ENSMUSG00000035234	-0.252359	5.18238	2.72443	0.206377	family with sequence similarity 175, member A [Source:MGI Symbol;Acc:MGI:1917931]	Fam175a	30.7271	36.5342	26.7132	37.6413	31.7974	42.5626
ENSMUSG00000029649	-0.252221	7.34645	2.41439	0.170212	proteasome maturation protein [Source:MGI Symbol;Acc:MGI:1913787]	Pomp	120.926	166.872	152.364	209.008	151.038	164.311
ENSMUSG00000029422	-0.252199	5.93629	1.79698	0.227654	arginine/serine-rich coiled-coil 2 [Source:MGI Symbol;Acc:MGI:1913489]	Rsrc2	42.6214	59.2446	60.3519	79.2448	57.6328	56.4202
ENSMUSG00000024542	-0.251984	6.18568	4.85044	0.0705055	centrosomal protein 192 [Source:MGI Symbol;Acc:MGI:1918049]	Cep192	60.463	60.232	73.2138	81.226	82.4746	67.3083
ENSMUSG00000029911	-0.251863	5.74533	3.20825	0.122443	single-stranded DNA binding protein 1 [Source:MGI Symbol;Acc:MGI:1920040]	Ssbp1	53.5246	47.3957	40.5644	48.5375	55.6455	64.3388
ENSMUSG00000026039	-0.251616	6.14922	2.38804	0.172217	shugoshin-like 2a (S. pombe) [Source:MGI Symbol;Acc:MGI:1098767]	Sgol2a	52.5334	63.1942	73.2138	88.1599	73.5316	63.349
ENSMUSG00000026721	-0.25151	6.36681	12.3554	0.0542296	RAB GTPase activating protein 1-like [Source:MGI Symbol;Acc:MGI:1352507]	Rabgap1l	68.3925	76.0305	76.1819	94.1033	84.4619	84.1353
ENSMUSG00000027665	-0.251492	5.33177	4.64349	0.183702	phosphatidylinositol 3-kinase, catalytic, alpha polypeptide [Source:MGI Symbol;Acc:MGI:1206581]	Pik3ca	39.6479	32.5845	32.6494	36.6507	44.7151	43.5524
ENSMUSG00000026429	-0.25135	5.69564	5.90939	0.129819	ubiquitin-conjugating enzyme E2T [Source:MGI Symbol;Acc:MGI:1914446]	Ube2t	40.6391	48.3831	47.49	60.4242	50.6772	51.471
ENSMUSG00000048271	-0.25135	5.69564	3.09296	0.129819	RNA binding motif protein 33 [Source:MGI Symbol;Acc:MGI:1919670]	Rbm33	41.6302	53.3201	41.5538	58.4431	45.7088	58.3998
ENSMUSG00000024498	-0.251034	7.28366	4.11543	0.0878605	transcription elongation regulator 1 (CA150) [Source:MGI Symbol;Acc:MGI:1926421]	Tcerg1	120.926	152.061	148.406	192.169	153.025	156.393
ENSMUSG00000026478	0.207893	9.7207	7.58233	0.0324355	laminin, gamma 1 [Source:MGI Symbol;Acc:MGI:99914]	Lamc1	976.328	847.197	883.513	720.138	829.714	793.842
ENSMUSG00000022034	-0.250814	5.94405	2.36129	0.174287	establishment of sister chromatid cohesion N-acetyltransferase 2 [Source:MGI Symbol;Acc:MGI:1919238]	Esco2	44.6038	61.2194	57.3838	77.2637	56.6392	60.3795
ENSMUSG00000022358	-0.250754	5.03039	8.48127	0.234898	F-box protein 32 [Source:MGI Symbol;Acc:MGI:1914981]	Fbxo32	28.7447	25.6726	29.6813	32.6885	35.7721	31.6745
ENSMUSG00000050323	-0.250726	4.74976	3.91007	0.284109	NADH dehydrogenase (ubiquinone) complex I, assembly factor 6 [Source:MGI Symbol;Acc:MGI:1924197]	Ndufaf6	24.7799	19.7482	23.745	24.764	30.8038	25.7355
ENSMUSG00000028430	0.206138	7.20836	39.5229	0.0337445	nucleolar protein family 6 (RNA-associated) [Source:MGI Symbol;Acc:MGI:2140151]	Nol6	157.6	156.998	154.343	134.716	135.139	136.596
ENSMUSG00000005410	0.202979	8.2212	8.67535	0.0251462	minichromosome maintenance complex component 5 [Source:MGI Symbol;Acc:MGI:103197]	Mcm5	341.963	304.122	305.717	255.565	287.171	284.081
ENSMUSG00000030616	-0.250596	3.94019	2.375	0.431013	synaptotagmin-like 2 [Source:MGI Symbol;Acc:MGI:1933366]	Sytl2	12.8856	9.8741	13.8513	13.8678	16.8924	12.8678
ENSMUSG00000024008	-0.250596	3.94018	5.75759	0.431013	copine V [Source:MGI Symbol;Acc:MGI:2385908]	Cpne5	12.8856	12.8363	10.8831	13.8678	13.9114	15.8372
ENSMUSG00000039648	-0.250596	3.94018	5.75759	0.431013	kynurenine aminotransferase 1 [Source:MGI Symbol;Acc:MGI:1917516]	Kyat1	12.8856	12.8363	10.8831	13.8678	13.9114	15.8372
ENSMUSG00000031848	0.20234	7.14246	7.3911	0.0417034	LSM4 homolog, U6 small nuclear RNA and mRNA degradation associated [Source:MGI Symbol;Acc:MGI:1354692]	Lsm4	153.635	156.011	137.523	124.811	123.215	140.556
ENSMUSG00000095082	-0.250386	3.259	0.776072	0.550461	predicted gene 15091 [Source:MGI Symbol;Acc:MGI:3712222]	Gm15091	4.95598	8.88669	6.92563	10.8962	5.96202	7.91862
ENSMUSG00000075033	-0.250386	3.259	2.16262	0.550461	neurexophilin and PC-esterase domain family, member 3 [Source:MGI Symbol;Acc:MGI:2686598]	Nxpe3	7.92957	6.91187	5.93626	6.93392	7.94936	9.89828
ENSMUSG00000044906	-0.250386	3.259	0.77527	0.550461	RIKEN cDNA 4930503L19 gene [Source:MGI Symbol;Acc:MGI:1922045]	4930503L19Rik	6.93837	8.88669	4.94688	7.92448	5.96202	10.8881
ENSMUSG00000021408	-0.250204	5.59085	8.62091	0.146432	receptor (TNFRSF)-interacting serine-threonine kinase 1 [Source:MGI Symbol;Acc:MGI:108212]	Ripk1	38.6567	44.4334	43.5325	54.4808	47.6961	48.5016
ENSMUSG00000022141	-0.250158	7.30641	2.49996	0.163924	Nipped-B homolog (Drosophila) [Source:MGI Symbol;Acc:MGI:1913976]	Nipbl	117.952	149.099	161.268	202.074	159.981	147.484
ENSMUSG00000001119	-0.250108	5.40665	4.8975	0.174319	collagen, type VI, alpha 1 [Source:MGI Symbol;Acc:MGI:88459]	Col6a1	39.6479	38.509	32.6494	40.613	41.7341	49.4914
ENSMUSG00000022337	-0.249843	6.40945	9.26084	0.0522145	ER membrane protein complex subunit 2 [Source:MGI Symbol;Acc:MGI:1913986]	Emc2	70.3749	81.955	75.1926	97.0749	83.4683	90.0743
ENSMUSG00000048249	-0.249802	4.94792	9.5911	0.250925	CREB3 regulatory factor [Source:MGI Symbol;Acc:MGI:1924378]	Crebrf	24.7799	27.6475	26.7132	33.6791	29.8101	30.6847
ENSMUSG00000026113	-0.249099	5.12213	6.75622	0.222372	inositol polyphosphate-4-phosphatase, type I [Source:MGI Symbol;Acc:MGI:1931123]	Inpp4a	27.7535	29.6223	32.6494	38.6319	35.7721	32.6643
ENSMUSG00000028890	-0.249089	4.27138	2.56349	0.373832	metal response element binding transcription factor 1 [Source:MGI Symbol;Acc:MGI:101786]	Mtf1	13.8767	18.7608	14.8406	20.8018	15.8987	19.7966
ENSMUSG00000001700	-0.249089	4.27139	8.79698	0.373832	GRAM domain containing 3 [Source:MGI Symbol;Acc:MGI:1914815]	Gramd3	16.8503	15.7986	14.8406	17.8301	18.8797	19.7966
ENSMUSG00000031557	-0.248714	5.76298	19.154	0.124641	pleckstrin homology domain-containing, family A (phosphoinositide binding specific) member 2 [Source:MGI Symbol;Acc:MGI:1928144]	Plekha2	46.5862	47.3957	49.4688	58.4431	57.6328	54.4405
ENSMUSG00000031402	-0.24871	6.71162	2.1444	0.192444	membrane protein, palmitoylated [Source:MGI Symbol;Acc:MGI:105941]	Mpp1	78.3045	110.59	93.0013	131.745	92.4113	110.861
ENSMUSG00000025574	-0.248612	6.00093	9.38124	0.0947049	thymidine kinase 1 [Source:MGI Symbol;Acc:MGI:98763]	Tk1	54.5158	61.2194	54.4157	70.3298	61.6075	70.2778
ENSMUSG00000013663	-0.248548	5.27754	7.49134	0.197619	phosphatase and tensin homolog [Source:MGI Symbol;Acc:MGI:109583]	Pten	30.7271	34.5593	35.6175	43.5847	38.7531	37.6134
ENSMUSG00000032115	0.202102	10.569	8.45141	0.026446	hypoxia up-regulated 1 [Source:MGI Symbol;Acc:MGI:108030]	Hyou1	1748.47	1571.96	1549.36	1307.54	1453.74	1471.87
ENSMUSG00000039953	0.201947	8.02398	17.5585	0.00566425	calsyntenin 1 [Source:MGI Symbol;Acc:MGI:1929895]	Clstn1	283.482	263.638	281.972	234.763	251.398	234.589
ENSMUSG00000024513	-0.24814	4.54059	0.864474	0.387663	methyl-CpG binding domain protein 2 [Source:MGI Symbol;Acc:MGI:1333813]	Mbd2	17.8415	14.8111	25.7238	23.7735	28.8164	16.8271
ENSMUSG00000037685	-0.24814	4.54059	1.87373	0.326746	ATPase, aminophospholipid transporter (APLT), class I, type 8A, member 1 [Source:MGI Symbol;Acc:MGI:1330848]	Atp8a1	22.7975	15.7986	19.7875	19.8112	27.8228	21.7762
ENSMUSG00000029569	-0.248103	5.41783	6.87431	0.176036	transmembrane protein 168 [Source:MGI Symbol;Acc:MGI:1921794]	Tmem168	38.6567	39.4964	33.6388	42.5941	41.7341	48.5016
ENSMUSG00000053838	-0.24809	5.95945	25.9596	0.10036	NudC domain containing 3 [Source:MGI Symbol;Acc:MGI:2144158]	Nudcd3	54.5158	56.2823	54.4157	66.3676	63.5949	66.3184
ENSMUSG00000024563	-0.248086	6.16921	6.67152	0.0766594	SMAD family member 2 [Source:MGI Symbol;Acc:MGI:108051]	Smad2	57.4894	67.1439	67.2776	84.1977	72.5379	71.2676
ENSMUSG00000032119	-0.247737	5.54568	16.7106	0.157124	histone H4 transcription factor [Source:MGI Symbol;Acc:MGI:2429620]	Hinfp	40.6391	42.4586	39.575	48.5375	46.7025	50.4812
ENSMUSG00000015214	-0.247737	5.54569	4.32124	0.157124	myotubularin related protein 1 [Source:MGI Symbol;Acc:MGI:1858271]	Mtmr1	46.5862	38.509	37.5963	42.5941	50.6772	52.4609
ENSMUSG00000001999	-0.24761	6.13235	12.3729	0.0811529	biliverdin reductase A [Source:MGI Symbol;Acc:MGI:88170]	Blvra	66.4102	61.2194	59.3626	69.3392	74.5252	78.1964
ENSMUSG00000006299	0.201702	7.53929	6.44439	0.0433784	angio-associated migratory protein [Source:MGI Symbol;Acc:MGI:107809]	Aamp	215.09	187.608	187.981	156.509	178.861	178.169
ENSMUSG00000025234	-0.247549	6.54826	3.17689	0.123951	ariadne RBR E3 ubiquitin protein ligase 1 [Source:MGI Symbol;Acc:MGI:1344363]	Arih1	98.1284	77.0179	76.1819	84.1977	106.323	107.891
ENSMUSG00000002871	-0.247487	4.76735	3.28001	0.287211	transmembrane protein, adipocyte asscociated 1 [Source:MGI Symbol;Acc:MGI:1345190]	Tpra1	24.7799	24.6852	19.7875	25.7546	24.8417	31.6745
ENSMUSG00000014905	-0.247129	4.12894	4.01185	0.403412	DnaJ heat shock protein family (Hsp40) member B9 [Source:MGI Symbol;Acc:MGI:1351618]	Dnajb9	12.8856	15.7986	13.8513	18.8207	14.905	16.8271
ENSMUSG00000027331	-0.247109	6.09452	26.3652	0.0859307	kinetochore-localized astrin/SPAG5 binding [Source:MGI Symbol;Acc:MGI:1289298]	Knstrn	59.4718	61.2194	61.3413	74.292	71.5442	70.2778
ENSMUSG00000022558	0.199541	7.27599	28.0985	0.0353225	maestro heat-like repeat family member 1 [Source:MGI Symbol;Acc:MGI:2442558]	Mroh1	167.512	160.948	162.258	138.678	145.076	143.525
ENSMUSG00000041736	0.195897	7.59824	6.97759	0.0377182	translocator protein [Source:MGI Symbol;Acc:MGI:88222]	Tspo	222.028	195.507	196.886	164.433	186.81	185.098
ENSMUSG00000019773	-0.246648	5.13573	15.5427	0.224637	F-box protein 5 [Source:MGI Symbol;Acc:MGI:1914391]	Fbxo5	29.7359	31.5971	29.6813	36.6507	34.7784	36.6236
ENSMUSG00000034751	-0.246631	6.32584	7.87884	0.0628008	microtubule associated serine/threonine kinase family member 4 [Source:MGI Symbol;Acc:MGI:1918885]	Mast4	65.419	72.0809	77.1713	92.1221	84.4619	78.1964
ENSMUSG00000056666	0.195221	7.51083	23.9376	0.0253734	retinol saturase (all trans retinol 13,14 reductase) [Source:MGI Symbol;Acc:MGI:1914692]	Retsat	193.283	197.482	186.992	167.405	163.956	173.22
ENSMUSG00000026455	-0.246488	4.4234	2.49645	0.35122	kelch-like 12 [Source:MGI Symbol;Acc:MGI:2385619]	Klhl12	19.8239	14.8111	18.7981	18.8207	24.8417	19.7966
ENSMUSG00000020528	-0.246488	4.42339	2.84854	0.35122	phosphoribosyl pyrophosphate synthetase-associated protein 2 [Source:MGI Symbol;Acc:MGI:2384838]	Prpsap2	16.8503	20.7356	15.83	22.7829	17.8861	22.766
ENSMUSG00000032431	0.194071	7.15257	8.0515	0.0499535	cartilage associated protein [Source:MGI Symbol;Acc:MGI:1891221]	Crtap	159.583	140.212	149.396	122.83	139.114	130.657
ENSMUSG00000011960	-0.246316	5.8273	4.71936	0.119653	cyclin T1 [Source:MGI Symbol;Acc:MGI:1328363]	Ccnt1	48.5686	45.4208	56.3944	61.4148	64.5885	52.4609
ENSMUSG00000020516	-0.246131	5.42893	14.9284	0.177744	ribosomal protein S6 kinase, polypeptide 1 [Source:MGI Symbol;Acc:MGI:1270849]	Rps6kb1	35.6831	38.509	38.5857	46.5563	43.7215	43.5524
ENSMUSG00000029283	-0.24576	4.87676	10.5832	0.271149	cell division cycle 7 (S. cerevisiae) [Source:MGI Symbol;Acc:MGI:1309511]	Cdc7	25.7711	25.6726	23.745	28.7263	28.8164	31.6745
ENSMUSG00000039910	-0.245644	5.78041	6.29392	0.126963	Cbp/p300-interacting transactivator, with Glu/Asp-rich carboxy-terminal domain, 2 [Source:MGI Symbol;Acc:MGI:1306784]	Cited2	45.595	46.4083	53.4263	61.4148	59.6202	51.471
ENSMUSG00000030145	-0.245589	2.95561	2.28994	0.607638	zinc finger protein 248 [Source:MGI Symbol;Acc:MGI:1919970]	Zfp248	4.95598	4.93705	5.93626	6.93392	6.95569	4.94914
ENSMUSG00000057604	-0.245589	2.95561	0.947778	0.607638	LIM and cysteine-rich domains 1 [Source:MGI Symbol;Acc:MGI:1353635]	Lmcd1	3.96479	6.91187	4.94688	7.92448	4.96835	5.93897
ENSMUSG00000039824	-0.245589	2.95562	1.1477	0.607638	myosin, light polypeptide 6B [Source:MGI Symbol;Acc:MGI:1917789]	Myl6b	5.94718	3.94964	5.93626	4.9528	7.94936	5.93897
ENSMUSG00000074093	-0.245589	2.95561	2.11513	0.607638	small VCP/p97-interacting protein [Source:MGI Symbol;Acc:MGI:1922994]	Svip	5.94718	5.92446	3.9575	5.94336	5.96202	6.92879
ENSMUSG00000013629	0.192886	8.83719	20.3466	0.00385447	carbamoyl-phosphate synthetase 2, aspartate transcarbamylase, and dihydroorotase [Source:MGI Symbol;Acc:MGI:1916969]	Cad	503.528	480.868	472.922	410.092	429.265	435.524
ENSMUSG00000035941	-0.245357	5.2212	1.10068	0.333735	inhibitor of Bruton agammaglobulinemia tyrosine kinase [Source:MGI Symbol;Acc:MGI:1918677]	Ibtk	24.7799	32.5845	39.575	48.5375	36.7658	29.6948
ENSMUSG00000095180	-0.245006	5.62019	7.34819	0.150643	reproductive homeobox 5 [Source:MGI Symbol;Acc:MGI:97538]	Rhox5	41.6302	47.3957	40.5644	53.4903	46.7025	53.4507
ENSMUSG00000038535	-0.244934	3.55077	0.603433	0.509778	zinc finger protein 280D [Source:MGI Symbol;Acc:MGI:2384583]	Zfp280d	5.94718	9.8741	10.8831	14.8584	8.94303	7.91862
ENSMUSG00000025921	-0.244934	3.55077	3.99403	0.509778	retinol dehydrogenase 10 (all-trans) [Source:MGI Symbol;Acc:MGI:1924238]	Rdh10	7.92957	9.8741	8.90438	11.8867	9.9367	9.89828
ENSMUSG00000041559	-0.244934	3.55077	9.65823	0.509778	fibromodulin [Source:MGI Symbol;Acc:MGI:1328364]	Fmod	8.92077	8.88669	8.90438	10.8962	10.9304	9.89828
ENSMUSG00000022706	-0.244743	6.02309	22.6008	0.0972786	mitochondrial ribosomal protein L40 [Source:MGI Symbol;Acc:MGI:1332635]	Mrpl40	59.4718	56.2823	57.3838	66.3676	70.5506	68.2981
ENSMUSG00000006289	-0.244654	3.97088	11.3036	0.436501	O-sialoglycoprotein endopeptidase [Source:MGI Symbol;Acc:MGI:1913496]	Osgep	12.8856	11.8489	12.8619	14.8584	14.905	14.8474
ENSMUSG00000079834	-0.244654	3.97087	1.16643	0.436501	trimethyllysine hydroxylase, epsilon [Source:MGI Symbol;Acc:MGI:2180203]	Tmlhe	10.9032	15.7986	10.8831	16.8395	10.9304	16.8271
ENSMUSG00000013646	-0.244654	3.97088	1.25563	0.436501	SH3 binding domain protein 5 like [Source:MGI Symbol;Acc:MGI:1933124]	Sh3bp5l	12.8856	14.8111	9.89376	13.8678	11.924	18.8067
ENSMUSG00000038888	-0.244499	4.29585	6.37602	0.378239	cytosolic thiouridylase subunit 1 [Source:MGI Symbol;Acc:MGI:2385277]	Ctu1	16.8503	14.8111	16.8194	17.8301	20.8671	18.8067
ENSMUSG00000015597	-0.244499	4.29584	3.20073	0.378239	zinc finger protein 318 [Source:MGI Symbol;Acc:MGI:1889348]	Zfp318	13.8767	17.7734	16.8194	21.7923	16.8924	18.8067
ENSMUSG00000028496	-0.244499	4.29584	2.3345	0.378239	myeloid/lymphoid or mixed-lineage leukemia; translocated to, 3 [Source:MGI Symbol;Acc:MGI:1917372]	Mllt3	13.8767	18.7608	15.83	21.7923	15.8987	19.7966
ENSMUSG00000039908	-0.244401	4.5609	1.69563	0.330387	solute carrier family 26, member 11 [Source:MGI Symbol;Acc:MGI:2444589]	Slc26a11	18.8327	16.786	23.745	23.7735	27.8228	18.8067
ENSMUSG00000030793	0.192885	7.4495	7.53245	0.0328321	PYD and CARD domain containing [Source:MGI Symbol;Acc:MGI:1931465]	Pycard	199.23	177.734	176.109	149.575	166.937	167.281
ENSMUSG00000021520	-0.244332	4.78473	5.57514	0.290275	ubiquinol-cytochrome c reductase binding protein [Source:MGI Symbol;Acc:MGI:1914780]	Uqcrb	21.8063	25.6726	22.7556	29.7168	24.8417	28.705
ENSMUSG00000028792	0.192128	9.02305	19.8802	0.00407804	adenylate kinase 2 [Source:MGI Symbol;Acc:MGI:87978]	Ak2	573.903	540.113	544.157	466.554	494.848	489.965
ENSMUSG00000005233	-0.244138	5.78905	3.42744	0.128119	SPC25, NDC80 kinetochore complex component, homolog (S. cerevisiae) [Source:MGI Symbol;Acc:MGI:1913692]	Spc25	42.6214	48.3831	55.4051	65.377	57.6328	50.4812
ENSMUSG00000013236	0.191402	7.73418	10.2337	0.0180984	protein tyrosine phosphatase, receptor type, S [Source:MGI Symbol;Acc:MGI:97815]	Ptprs	237.887	213.28	223.599	186.225	207.677	196.976
ENSMUSG00000092035	0.191201	7.63222	30.8002	0.0223301	paternally expressed 10 [Source:MGI Symbol;Acc:MGI:2157785]	Peg10	212.116	211.306	204.801	181.273	181.842	187.077
ENSMUSG00000029486	-0.24311	5.23391	8.41923	0.214801	mitochondrial ribosomal protein L1 [Source:MGI Symbol;Acc:MGI:2137202]	Mrpl1	30.7271	34.5593	32.6494	41.6035	35.7721	38.6033
ENSMUSG00000027573	-0.24311	5.23391	3.86466	0.214801	GID complex subunit 8 [Source:MGI Symbol;Acc:MGI:1923675]	Gid8	32.7095	36.5342	28.6919	37.6413	34.7784	43.5524
ENSMUSG00000021929	-0.242332	6.12213	7.39721	0.0889816	karyopherin (importin) alpha 3 [Source:MGI Symbol;Acc:MGI:1100863]	Kpna3	56.4982	63.1942	66.2882	80.2354	71.5442	68.2981
ENSMUSG00000032679	-0.242279	5.45087	5.09255	0.181134	CD59a antigen [Source:MGI Symbol;Acc:MGI:109177]	Cd59a	37.6655	42.4586	34.6282	45.5658	40.7405	49.4914
ENSMUSG00000024150	-0.242116	5.94791	4.75286	0.110241	multiple coagulation factor deficiency 2 [Source:MGI Symbol;Acc:MGI:2183439]	Mcfd2	48.5686	60.232	55.4051	72.3109	58.6265	63.349
ENSMUSG00000041997	-0.242104	5.31391	3.19259	0.203466	tousled-like kinase 1 [Source:MGI Symbol;Acc:MGI:2441683]	Tlk1	29.7359	36.5342	37.5963	47.5469	37.7595	37.6134
ENSMUSG00000078584	-0.242058	4.15592	4.59448	0.408248	expressed sequence AU022252 [Source:MGI Symbol;Acc:MGI:2140466]	AU022252	15.8591	12.8363	14.8406	15.849	18.8797	16.8271
ENSMUSG00000022664	-0.242058	4.15591	6.77785	0.408248	solute carrier family 35, member A5 [Source:MGI Symbol;Acc:MGI:1921352]	Slc35a5	13.8767	15.7986	13.8513	17.8301	15.8987	17.8169
ENSMUSG00000022881	-0.241974	6.6105	5.46311	0.0571882	replication factor C (activator 1) 4 [Source:MGI Symbol;Acc:MGI:2146571]	Rfc4	98.1284	83.9298	81.1288	92.1221	107.316	111.851
ENSMUSG00000011427	-0.241431	3.79334	2.48155	0.473876	zinc finger protein 790 [Source:MGI Symbol;Acc:MGI:1923431]	Zfp790	12.8856	9.8741	9.89376	10.8962	13.9114	13.8576
ENSMUSG00000032577	-0.241431	3.79334	1.96653	0.473876	mitogen-activated protein kinase-activated protein kinase 3 [Source:MGI Symbol;Acc:MGI:2143163]	Mapkapk3	12.8856	10.8615	8.90438	10.8962	12.9177	14.8474
ENSMUSG00000022507	-0.241371	5.90486	24.5711	0.116897	RIKEN cDNA 1810013L24 gene [Source:MGI Symbol;Acc:MGI:1916303]	1810013L24Rik	52.5334	52.3327	54.4157	63.3959	63.5949	61.3693
ENSMUSG00000075376	-0.241258	4.80191	6.43505	0.2933	ring finger and CCCH-type zinc finger domains 2 [Source:MGI Symbol;Acc:MGI:2442789]	Rc3h2	24.7799	21.723	24.7344	26.7451	30.8038	26.7253
ENSMUSG00000025040	-0.241258	4.8019	4.42583	0.2933	FUN14 domain containing 1 [Source:MGI Symbol;Acc:MGI:1919268]	Fundc1	21.8063	26.6601	22.7556	29.7168	24.8417	29.6948
ENSMUSG00000030763	-0.241206	5.38972	9.11631	0.192822	leucine carboxyl methyltransferase 1 [Source:MGI Symbol;Acc:MGI:1353593]	Lcmt1	36.6743	34.5593	38.5857	42.5941	46.7025	40.5829
ENSMUSG00000018395	-0.241157	6.39255	9.76998	0.0624727	kinesin family member 3A [Source:MGI Symbol;Acc:MGI:107689]	Kif3a	69.3837	77.0179	79.1501	96.0844	86.4493	84.1353
ENSMUSG00000052738	-0.240788	8.34426	5.09906	0.0638193	succinate-CoA ligase, GDP-forming, alpha subunit [Source:MGI Symbol;Acc:MGI:1927234]	Suclg1	263.658	326.833	297.802	390.281	314.993	344.46
ENSMUSG00000025889	-0.240774	4.58094	7.46005	0.333969	synuclein, alpha [Source:MGI Symbol;Acc:MGI:1277151]	Snca	20.8151	18.7608	20.7769	22.7829	25.8354	22.766
ENSMUSG00000027997	-0.240774	4.58093	12.1366	0.333969	caspase 6 [Source:MGI Symbol;Acc:MGI:1312921]	Casp6	19.8239	20.7356	19.7875	24.764	22.8544	23.7559
ENSMUSG00000031976	-0.240422	6.28976	6.82906	0.0733123	URB2 ribosome biogenesis 2 homolog (S. cerevisiae) [Source:MGI Symbol;Acc:MGI:2681124]	Urb2	65.419	77.0179	67.2776	87.1693	74.5252	86.115
ENSMUSG00000000131	-0.24032	5.75859	12.0431	0.138445	exportin 6 [Source:MGI Symbol;Acc:MGI:2429950]	Xpo6	50.551	45.4208	47.49	53.4903	59.6202	56.4202
ENSMUSG00000030556	-0.240188	3.30791	2.48238	0.558706	leucine rich repeat containing 28 [Source:MGI Symbol;Acc:MGI:1915689]	Lrrc28	5.94718	7.89928	7.91501	9.90561	7.94936	7.91862
ENSMUSG00000027669	-0.240188	3.30792	2.40307	0.558706	guanine nucleotide binding protein (G protein), beta 4 [Source:MGI Symbol;Acc:MGI:104581]	Gnb4	7.92957	5.92446	7.91501	7.92448	9.9367	7.91862
ENSMUSG00000042111	-0.240188	3.30791	6.22258	0.558706	coiled-coil domain containing 115 [Source:MGI Symbol;Acc:MGI:1916918]	Ccdc115	6.93837	7.89928	6.92563	8.91505	7.94936	8.90845
ENSMUSG00000010122	0.191114	9.00277	13.0593	0.0107884	solute carrier family 47, member 1 [Source:MGI Symbol;Acc:MGI:1914723]	Slc47a1	535.246	526.289	572.849	485.375	493.854	452.351
ENSMUSG00000042599	-0.240077	4.31988	2.61184	0.382553	lysine (K)-specific demethylase 7A [Source:MGI Symbol;Acc:MGI:2443388]	Kdm7a	13.8767	17.7734	17.8088	22.7829	17.8861	17.8169
ENSMUSG00000054814	-0.240077	4.31989	4.56719	0.382553	ubiquitin specific peptidase 46 [Source:MGI Symbol;Acc:MGI:1916977]	Usp46	14.8679	17.7734	16.8194	21.7923	17.8861	18.8067
ENSMUSG00000025794	-0.240046	4.90881	1.14511	0.324918	ribosomal protein L14 [Source:MGI Symbol;Acc:MGI:1914365]	Rpl14	19.8239	31.5971	25.7238	37.6413	23.8481	29.6948
ENSMUSG00000035351	-0.240046	4.90881	2.90607	0.276736	nucleoporin 37 [Source:MGI Symbol;Acc:MGI:1919964]	Nup37	22.7975	29.6223	24.7344	33.6791	25.8354	31.6745
ENSMUSG00000058407	-0.240022	5.64896	3.66141	0.15481	thioredoxin domain containing 9 [Source:MGI Symbol;Acc:MGI:2138153]	Txndc9	50.551	42.4586	39.575	45.5658	53.6582	57.41
ENSMUSG00000031633	0.189935	10.9078	6.51489	0.0425673	solute carrier family 25 (mitochondrial carrier, adenine nucleotide translocator), member 4 [Source:MGI Symbol;Acc:MGI:1353495]	Slc25a4	2216.32	1943.22	1976.77	1651.26	1882.01	1846.03
ENSMUSG00000068747	0.189844	8.3154	8.79033	0.0245119	sortilin 1 [Source:MGI Symbol;Acc:MGI:1338015]	Sort1	360.795	321.896	329.462	276.366	309.031	301.897
ENSMUSG00000023932	-0.239464	6.4698	3.61799	0.104864	cell division cycle 5-like (S. pombe) [Source:MGI Symbol;Acc:MGI:1918952]	Cdc5l	68.3925	84.9172	85.0863	107.971	87.4429	86.115
ENSMUSG00000079083	-0.239406	4.70481	9.22263	0.314399	Jrk-like [Source:MGI Symbol;Acc:MGI:1924782]	Jrkl	20.8151	22.7104	22.7556	27.7357	25.8354	24.7457
ENSMUSG00000052906	-0.239406	4.70481	11.8969	0.314399	UBX domain protein 8 [Source:MGI Symbol;Acc:MGI:1337129]	Ubxn8	21.8063	21.723	22.7556	26.7451	26.8291	24.7457
ENSMUSG00000044068	-0.239406	4.70481	1.67278	0.314399	zinc finger (CCCH type), RNA binding motif and serine/arginine rich 1 [Source:MGI Symbol;Acc:MGI:98885]	Zrsr1	26.7623	18.7608	20.7769	20.8018	29.8101	27.7152
ENSMUSG00000039737	-0.23925	5.40102	4.50908	0.194615	Prkr interacting protein 1 (IL11 inducible) [Source:MGI Symbol;Acc:MGI:1914051]	Prkrip1	33.7007	41.4712	35.6175	47.5469	38.7531	44.5422
ENSMUSG00000035173	-0.239009	5.59578	1.48197	0.268276	coiled-coil domain containing 186 [Source:MGI Symbol;Acc:MGI:2445022]	Ccdc186	33.7007	43.446	50.4582	61.4148	47.6961	41.5728
ENSMUSG00000018398	0.185954	7.48047	13.0396	0.0350919	septin 8 [Source:MGI Symbol;Acc:MGI:894310]	Sept8	184.363	197.482	182.045	168.395	157	170.25
ENSMUSG00000038766	-0.238516	4.46712	1.42196	0.359063	GA repeat binding protein, beta 2 [Source:MGI Symbol;Acc:MGI:95612]	Gabpb2	18.8327	14.8111	21.7663	20.8018	26.8291	17.8169
ENSMUSG00000036523	-0.238516	4.46711	10.8784	0.359063	gene regulated by estrogen in breast cancer protein [Source:MGI Symbol;Acc:MGI:2149712]	Greb1	18.8327	18.7608	17.8088	20.8018	21.8607	22.766
ENSMUSG00000046722	-0.238516	4.46711	3.23524	0.359063	CDC42 small effector 1 [Source:MGI Symbol;Acc:MGI:1889510]	Cdc42se1	16.8503	20.7356	17.8088	24.764	18.8797	21.7762
ENSMUSG00000018995	-0.238516	4.46712	2.37793	0.359063	asparaginyl-tRNA synthetase 2 (mitochondrial)(putative) [Source:MGI Symbol;Acc:MGI:2142075]	Nars2	21.8063	17.7734	15.83	18.8207	21.8607	24.7457
ENSMUSG00000044408	-0.238516	4.46711	1.09431	0.359063	serine palmitoyltransferase, small subunit A [Source:MGI Symbol;Acc:MGI:1913399]	Sptssa	19.8239	21.723	13.8513	19.8112	17.8861	27.7152
ENSMUSG00000034653	-0.238102	5.10146	3.78511	0.246946	YTH domain containing 2 [Source:MGI Symbol;Acc:MGI:2448561]	Ythdc2	26.7623	33.5719	28.6919	38.6319	30.8038	35.6338
ENSMUSG00000018068	-0.238102	5.10147	13.0061	0.246946	integrator complex subunit 2 [Source:MGI Symbol;Acc:MGI:1917672]	Ints2	30.7271	29.6223	28.6919	33.6791	34.7784	36.6236
ENSMUSG00000025579	0.184659	8.68353	10.1156	0.0185324	glucosidase, alpha, acid [Source:MGI Symbol;Acc:MGI:95609]	Gaa	456.942	411.75	437.304	364.526	404.424	380.094
ENSMUSG00000044224	-0.237807	5.87676	26.1894	0.126154	DnaJ heat shock protein family (Hsp40) member C21 [Source:MGI Symbol;Acc:MGI:1925371]	Dnajc21	51.5422	52.3327	52.4369	62.4053	60.6139	61.3693
ENSMUSG00000032582	-0.237254	4.60069	5.06694	0.337495	RNA binding motif protein 6 [Source:MGI Symbol;Acc:MGI:1338037]	Rbm6	18.8327	22.7104	19.7875	25.7546	21.8607	24.7457
ENSMUSG00000036411	-0.237254	4.60069	1.76069	0.337495	RIKEN cDNA 9530077C05 gene [Source:MGI Symbol;Acc:MGI:1915533]	9530077C05Rik	20.8151	23.6978	16.8194	23.7735	19.8734	28.705
ENSMUSG00000015627	-0.237093	6.54823	8.74229	0.0529578	GATA binding protein 5 [Source:MGI Symbol;Acc:MGI:109497]	Gata5	78.3045	90.8417	83.1076	105.99	91.4176	99.9726
ENSMUSG00000032641	-0.237061	3.59085	0.530305	0.516646	G protein-coupled receptor 19 [Source:MGI Symbol;Acc:MGI:892973]	Gpr19	6.93837	7.89928	12.8619	13.8678	11.924	6.92879
ENSMUSG00000027499	-0.237061	3.59085	1.07275	0.516646	protein kinase inhibitor, alpha [Source:MGI Symbol;Acc:MGI:104747]	Pkia	6.93837	9.8741	10.8831	13.8678	9.9367	8.90845
ENSMUSG00000015659	-0.237061	3.59085	2.85488	0.516646	serine active site containing 1 [Source:MGI Symbol;Acc:MGI:2447813]	Serac1	8.92077	7.89928	10.8831	10.8962	11.924	9.89828
ENSMUSG00000071266	-0.236532	2.57095	0.717941	0.679247	zinc finger protein 946 [Source:MGI Symbol;Acc:MGI:1921399]	Zfp946	2.97359	2.96223	4.94688	4.9528	4.96835	2.96948
ENSMUSG00000024235	-0.236532	2.57095	2.40012	0.679247	mitogen-activated protein kinase kinase kinase 8 [Source:MGI Symbol;Acc:MGI:1346878]	Map3k8	2.97359	3.94964	3.9575	4.9528	3.97468	3.95931
ENSMUSG00000026564	-0.236532	2.57095	2.40012	0.679247	dual specificity phosphatase 27 (putative) [Source:MGI Symbol;Acc:MGI:2685055]	Dusp27	2.97359	3.94964	3.9575	4.9528	3.97468	3.95931
ENSMUSG00000038085	-0.236532	2.57095	2.40012	0.679247	cyclic nucleotide binding domain containing 2 [Source:MGI Symbol;Acc:MGI:1918123]	Cnbd2	2.97359	3.94964	3.9575	4.9528	3.97468	3.95931
ENSMUSG00000063480	-0.236532	2.57095	2.40012	0.679247	NHP2 non-histone chromosome protein 2-like 1 (S. cerevisiae) [Source:MGI Symbol;Acc:MGI:893586]	Nhp2l1	2.97359	3.94964	3.9575	4.9528	3.97468	3.95931
ENSMUSG00000029699	-0.236532	2.57095	2.32591	0.679247	scavenger receptor cysteine rich family, 4 domains [Source:MGI Symbol;Acc:MGI:1924709]	Ssc4d	3.96479	2.96223	3.9575	3.96224	4.96835	3.95931
ENSMUSG00000045349	-0.236532	2.57095	2.32591	0.679247	SH2 domain containing 5 [Source:MGI Symbol;Acc:MGI:2446215]	Sh2d5	3.96479	2.96223	3.9575	3.96224	4.96835	3.95931
ENSMUSG00000056313	-0.236532	2.57095	2.32591	0.679247	RIKEN cDNA 1810011O10 gene [Source:MGI Symbol;Acc:MGI:1916318]	1810011O10Rik	3.96479	2.96223	3.9575	3.96224	4.96835	3.95931
ENSMUSG00000061104	-0.236532	2.57095	2.32591	0.679247	Sin3-associated polypeptide 18B [Source:MGI Symbol;Acc:MGI:3704317]	Sap18b	3.96479	2.96223	3.9575	3.96224	4.96835	3.95931
ENSMUSG00000031734	-0.236532	2.57095	2.38811	0.679247	Iroquois related homeobox 3 [Source:MGI Symbol;Acc:MGI:1197522]	Irx3	3.96479	3.94964	2.96813	3.96224	3.97468	4.94914
ENSMUSG00000004939	-0.236532	2.57095	0.715786	0.679247	nicotinamide riboside kinase 2 [Source:MGI Symbol;Acc:MGI:1916814]	Nmrk2	4.95598	2.96223	2.96813	2.97168	4.96835	4.94914
ENSMUSG00000050855	-0.236532	2.57095	0.715786	0.679247	zinc finger protein 940 [Source:MGI Symbol;Acc:MGI:2446235]	Zfp940	4.95598	2.96223	2.96813	2.97168	4.96835	4.94914
ENSMUSG00000022803	0.184486	8.28669	38.0587	0.00559881	popeye domain containing 2 [Source:MGI Symbol;Acc:MGI:1930150]	Popdc2	332.051	328.807	329.462	289.244	291.145	291.009
ENSMUSG00000073542	-0.236452	5.02307	3.912	0.263855	centrosomal protein 76 [Source:MGI Symbol;Acc:MGI:1923401]	Cep76	24.7799	29.6223	29.6813	37.6413	30.8038	30.6847
ENSMUSG00000016319	0.183624	8.17081	6.89603	0.0385171	solute carrier family 25 (mitochondrial carrier, adenine nucleotide translocator), member 5 [Source:MGI Symbol;Acc:MGI:1353496]	Slc25a5	310.244	320.908	281.972	262.499	253.386	288.04
ENSMUSG00000037706	0.182895	10.1727	13.1728	0.010585	CD81 antigen [Source:MGI Symbol;Acc:MGI:1096398]	Cd81	1285.58	1188.84	1201.1	1028.2	1111.92	1097.72
ENSMUSG00000021707	-0.236331	5.72745	2.66741	0.152528	dihydrofolate reductase [Source:MGI Symbol;Acc:MGI:94890]	Dhfr	39.6479	52.3327	48.4794	64.3864	48.6898	52.4609
ENSMUSG00000061740	-0.236213	4.72296	2.85149	0.317617	cytochrome P450, family 2, subfamily d, polypeptide 22 [Source:MGI Symbol;Acc:MGI:1929474]	Cyp2d22	25.7711	21.723	19.7875	22.7829	26.8291	29.6948
ENSMUSG00000021957	0.182075	9.92358	12.6517	0.0115632	transketolase [Source:MGI Symbol;Acc:MGI:105992]	Tkt	1082.39	1010.12	998.28	863.769	926.1	934.397
ENSMUSG00000051220	-0.235904	6.49114	14.1259	0.0591416	excision repair cross-complementing rodent repair deficiency complementation group 6 like [Source:MGI Symbol;Acc:MGI:2654144]	Ercc6l	76.3221	81.955	84.097	101.037	93.405	91.0641
ENSMUSG00000037151	-0.235815	4.34354	6.03371	0.386777	leucine rich repeat containing 20 [Source:MGI Symbol;Acc:MGI:2387182]	Lrrc20	16.8503	15.7986	17.8088	18.8207	21.8607	18.8067
ENSMUSG00000032058	-0.23569	5.61535	19.0818	0.167465	protein phosphatase 2, regulatory subunit A, beta [Source:MGI Symbol;Acc:MGI:1920949]	Ppp2r1b	44.6038	42.4586	42.5432	49.528	51.6708	51.471
ENSMUSG00000061136	-0.23557	7.3019	3.62529	0.104583	pre-mRNA processing factor 40A [Source:MGI Symbol;Acc:MGI:1860512]	Prpf40a	124.891	144.162	160.279	191.178	165.943	148.474
ENSMUSG00000018921	-0.235524	6.42616	8.71457	0.0655731	proline, glutamic acid and leucine rich protein 1 [Source:MGI Symbol;Acc:MGI:1922523]	Pelp1	73.3485	83.9298	74.2032	95.0938	83.4683	94.0336
ENSMUSG00000038305	-0.235507	6.16257	6.95165	0.093546	spermatogenesis associated, serine-rich 2-like [Source:MGI Symbol;Acc:MGI:1914448]	Spats2l	59.4718	70.1061	62.3307	80.2354	68.5632	77.2066
ENSMUSG00000023089	-0.23544	8.22677	3.05184	0.130228	NADH dehydrogenase (ubiquinone) 1 alpha subcomplex, 5 [Source:MGI Symbol;Acc:MGI:1915452]	Ndufa5	231.94	292.273	295.823	375.422	297.107	292.989
ENSMUSG00000020160	-0.235377	6.31989	18.5664	0.076355	Meis homeobox 1 [Source:MGI Symbol;Acc:MGI:104717]	Meis1	68.3925	73.0683	73.2138	88.1599	82.4746	82.1557
ENSMUSG00000037007	-0.235023	3.82729	2.27963	0.479779	zinc finger protein 113 [Source:MGI Symbol;Acc:MGI:1929116]	Zfp113	10.9032	9.8741	12.8619	13.8678	14.905	10.8881
ENSMUSG00000028229	-0.235023	3.82728	1.21854	0.479779	regulator of microtubule dynamics 1 [Source:MGI Symbol;Acc:MGI:1913552]	Rmdn1	8.92077	12.8363	11.8725	16.8395	10.9304	11.8779
ENSMUSG00000059183	-0.235023	3.82729	3.67931	0.479779	mitochondrial methionyl-tRNA formyltransferase [Source:MGI Symbol;Acc:MGI:1916856]	Mtfmt	11.8944	11.8489	9.89376	11.8867	12.9177	14.8474
ENSMUSG00000022553	-0.234595	4.94019	7.15124	0.2822	MAF1 homolog, negative regulator of RNA polymerase III [Source:MGI Symbol;Acc:MGI:1916127]	Maf1	27.7535	26.6601	24.7344	28.7263	30.8038	33.6541
ENSMUSG00000002477	-0.234524	5.28367	14.2062	0.222989	small nuclear ribonucleoprotein D1 [Source:MGI Symbol;Acc:MGI:98344]	Snrpd1	32.7095	34.5593	34.6282	41.6035	39.7468	38.6033
ENSMUSG00000024404	-0.234524	5.28367	17.2559	0.222989	RIO kinase 3 [Source:MGI Symbol;Acc:MGI:1914128]	Riok3	33.7007	34.5593	33.6388	40.613	38.7531	40.5829
ENSMUSG00000043065	-0.234524	5.28367	9.52999	0.222989	spindle and centriole associated protein 1 [Source:MGI Symbol;Acc:MGI:1196252]	Spice1	34.6919	35.5467	31.66	38.6319	38.7531	42.5626
ENSMUSG00000045624	-0.234447	5.79334	6.39905	0.143299	ESF1 nucleolar pre-rRNA processing protein homolog [Source:MGI Symbol;Acc:MGI:1913830]	Esf1	44.6038	52.3327	50.4582	63.3959	53.6582	56.4202
ENSMUSG00000017499	-0.234424	5.99349	9.90763	0.115984	cell division cycle 6 [Source:MGI Symbol;Acc:MGI:1345150]	Cdc6	59.4718	58.2572	52.4369	63.3959	65.5822	71.2676
ENSMUSG00000017929	-0.233954	5.03764	4.79991	0.266366	UDP-Gal:betaGlcNAc beta 1,4-galactosyltransferase, polypeptide 5 [Source:MGI Symbol;Acc:MGI:1927169]	B4galt5	26.7623	31.5971	26.7132	34.6696	29.8101	35.6338
ENSMUSG00000039844	-0.233838	4.62019	8.44576	0.340965	Rap guanine nucleotide exchange factor (GEF) 1 [Source:MGI Symbol;Acc:MGI:104580]	Rapgef1	19.8239	20.7356	21.7663	25.7546	24.8417	22.766
ENSMUSG00000087598	-0.233838	4.62019	9.72843	0.340965	zinc finger protein 111 [Source:MGI Symbol;Acc:MGI:1929114]	Zfp111	21.8063	20.7356	19.7875	23.7735	23.8481	25.7355
ENSMUSG00000032410	-0.233689	5.68642	3.75816	0.160295	5'-3' exoribonuclease 1 [Source:MGI Symbol;Acc:MGI:891964]	Xrn1	39.6479	50.3579	46.5007	60.4242	48.6898	51.471
ENSMUSG00000038827	-0.233588	4.03038	1.49841	0.447006	family with sequence similarity 206, member A [Source:MGI Symbol;Acc:MGI:2677850]	Fam206a	10.9032	15.7986	12.8619	18.8207	12.9177	14.8474
ENSMUSG00000024400	-0.233499	6.47249	30.3974	0.0634967	WD repeat domain 33 [Source:MGI Symbol;Acc:MGI:1921570]	Wdr33	78.3045	80.9676	80.1395	96.0844	92.4113	93.0438
ENSMUSG00000028214	-0.232907	5.21482	6.31851	0.23786	GTP binding protein (gene overexpressed in skeletal muscle) [Source:MGI Symbol;Acc:MGI:99844]	Gem	33.7007	29.6223	33.6388	35.6602	41.7341	36.6236
ENSMUSG00000010406	-0.232684	6.09452	16.4225	0.105803	mitochondrial ribosomal protein L52 [Source:MGI Symbol;Acc:MGI:1916086]	Mrpl52	62.4454	62.2068	58.3732	69.3392	70.5506	75.2269
ENSMUSG00000029669	-0.232678	3.01573	1.15229	0.617298	tetraspanin 12 [Source:MGI Symbol;Acc:MGI:1889818]	Tspan12	4.95598	4.93705	6.92563	7.92448	6.95569	4.94914
ENSMUSG00000044501	-0.232678	3.01573	2.36832	0.617298	zinc finger protein 758 [Source:MGI Symbol;Acc:MGI:2385044]	Zfp758	4.95598	5.92446	5.93626	7.92448	5.96202	5.93897
ENSMUSG00000074384	-0.232678	3.01573	2.36832	0.617298	expressed sequence AI429214 [Source:MGI Symbol;Acc:MGI:2142538]	AI429214	4.95598	5.92446	5.93626	7.92448	5.96202	5.93897
ENSMUSG00000053091	-0.232678	3.01573	2.36569	0.617298	lines homolog 1 [Source:MGI Symbol;Acc:MGI:1919885]	Lins1	5.94718	5.92446	4.94688	5.94336	5.96202	7.91862
ENSMUSG00000047909	-0.232678	3.01573	1.14977	0.617298	ankyrin repeat domain 16 [Source:MGI Symbol;Acc:MGI:2444796]	Ankrd16	6.93837	4.93705	4.94688	4.9528	6.95569	7.91862
ENSMUSG00000021969	-0.232524	4.20838	3.7983	0.417569	zinc finger, DHHC domain containing 20 [Source:MGI Symbol;Acc:MGI:1923215]	Zdhhc20	16.8503	14.8111	13.8513	15.849	17.8861	19.7966
ENSMUSG00000021987	-0.232489	4.85224	3.81744	0.302154	myotubularin related protein 6 [Source:MGI Symbol;Acc:MGI:2145637]	Mtmr6	25.7711	21.723	26.7132	27.7357	32.7911	26.7253
ENSMUSG00000029924	-0.231703	4.36681	2.50157	0.390915	solute carrier family 37 (glycerol-3-phosphate transporter), member 3 [Source:MGI Symbol;Acc:MGI:1919394]	Slc37a3	19.8239	15.7986	15.83	16.8395	21.8607	21.7762
ENSMUSG00000025265	-0.231619	5.81041	4.47823	0.145705	FYVE, RhoGEF and PH domain containing 1 [Source:MGI Symbol;Acc:MGI:104566]	Fgd1	44.6038	54.3075	50.4582	65.377	52.6645	57.41
ENSMUSG00000026484	-0.230999	6.23075	9.05888	0.0919357	ring finger protein 2 [Source:MGI Symbol;Acc:MGI:1101759]	Rnf2	68.3925	71.0935	62.3307	77.2637	74.5252	85.1252
ENSMUSG00000056076	0.180527	9.8732	6.23043	0.0459712	eukaryotic translation initiation factor 3, subunit B [Source:MGI Symbol;Acc:MGI:106478]	Eif3b	1075.45	956.8	950.79	809.288	909.208	913.611
ENSMUSG00000014547	-0.230799	3.35522	4.08934	0.5665	WD repeat and FYVE domain containing 2 [Source:MGI Symbol;Acc:MGI:2442811]	Wdfy2	6.93837	7.89928	7.91501	9.90561	8.94303	7.91862
ENSMUSG00000021981	-0.230799	3.35522	4.08934	0.5665	calcium binding protein 39-like [Source:MGI Symbol;Acc:MGI:1914081]	Cab39l	6.93837	7.89928	7.91501	9.90561	8.94303	7.91862
ENSMUSG00000020393	-0.230799	3.35522	3.9885	0.5665	kringle containing transmembrane protein 1 [Source:MGI Symbol;Acc:MGI:1933988]	Kremen1	7.92957	6.91187	7.91501	7.92448	9.9367	8.90845
ENSMUSG00000020910	-0.230799	3.35522	3.9885	0.5665	ADP-ribose/CDP-alcohol diphosphatase, manganese dependent [Source:MGI Symbol;Acc:MGI:1913608]	Adprm	7.92957	6.91187	7.91501	7.92448	9.9367	8.90845
ENSMUSG00000056383	-0.230799	3.35522	7.40792	0.5665	expressed sequence AI987944 [Source:MGI Symbol;Acc:MGI:2142079]	AI987944	7.92957	7.89928	6.92563	8.91505	8.94303	8.90845
ENSMUSG00000044148	-0.230766	5.22758	8.24108	0.240003	RIKEN cDNA 1810030O07 gene [Source:MGI Symbol;Acc:MGI:1916405]	1810030O07Rik	34.6919	32.5845	30.6707	35.6602	38.7531	40.5829
ENSMUSG00000026213	-0.23052	4.63943	1.52458	0.344382	serine/threonine kinase 11 interacting protein [Source:MGI Symbol;Acc:MGI:1918978]	Stk11ip	24.7799	21.723	16.8194	20.8018	23.8481	29.6948
ENSMUSG00000026643	-0.230458	5.30791	1.45477	0.272275	N-myristoyltransferase 2 [Source:MGI Symbol;Acc:MGI:1202298]	Nmt2	27.7535	35.5467	40.5644	49.528	38.7531	33.6541
ENSMUSG00000024976	-0.230458	5.30791	4.40595	0.226998	soc-2 (suppressor of clear) homolog (C. elegans) [Source:MGI Symbol;Acc:MGI:1927197]	Shoc2	30.7271	36.5342	36.6069	45.5658	37.7595	38.6033
ENSMUSG00000027427	-0.230458	5.30792	5.5925	0.226998	polymerase (RNA) III (DNA directed) polypeptide F [Source:MGI Symbol;Acc:MGI:1924086]	Polr3f	37.6655	34.5593	31.66	37.6413	39.7468	44.5422
ENSMUSG00000002395	-0.230183	5.38402	4.80929	0.214829	unconventional SNARE in the ER 1 homolog (S. cerevisiae) [Source:MGI Symbol;Acc:MGI:1914273]	Use1	39.6479	37.5216	32.6494	39.6224	41.7341	47.5117
ENSMUSG00000022329	-0.23011	6.19543	3.16328	0.124614	serine/threonine kinase 3 [Source:MGI Symbol;Acc:MGI:1928487]	Stk3	63.4366	75.0431	58.3732	78.2543	66.5759	86.115
ENSMUSG00000000563	-0.229936	8.08222	1.06378	0.341347	ATP synthase, H+ transporting, mitochondrial F0 complex, subunit B1 [Source:MGI Symbol;Acc:MGI:1100495]	Atp5f1	186.345	286.349	270.1	372.451	242.455	256.365
ENSMUSG00000029673	-0.229874	5.92459	7.03398	0.13257	autism susceptibility candidate 2 [Source:MGI Symbol;Acc:MGI:1919847]	Auts2	49.5598	57.2698	55.4051	69.3392	59.6202	61.3693
ENSMUSG00000029632	-0.229712	8.53221	2.45695	0.167043	NADH dehydrogenase (ubiquinone) 1 alpha subcomplex, 4 [Source:MGI Symbol;Acc:MGI:107686]	Ndufa4	283.482	376.203	357.165	468.535	352.753	371.185
ENSMUSG00000015243	0.179581	9.34972	25.1412	0.00227759	ATP-binding cassette, sub-family A (ABC1), member 1 [Source:MGI Symbol;Acc:MGI:99607]	Abca1	705.732	689.212	677.723	597.308	611.107	621.612
ENSMUSG00000025077	-0.229686	3.62984	3.38627	0.523225	DNA cross-link repair 1A [Source:MGI Symbol;Acc:MGI:1930042]	Dclre1a	8.92077	8.88669	10.8831	11.8867	11.924	9.89828
ENSMUSG00000062794	-0.229686	3.62985	2.18851	0.523225	zinc finger protein 599 [Source:MGI Symbol;Acc:MGI:2679006]	Zfp599	9.91196	7.89928	10.8831	10.8962	12.9177	9.89828
ENSMUSG00000026975	-0.229686	3.62984	7.27656	0.523225	diphthamine biosynethesis 7 [Source:MGI Symbol;Acc:MGI:1914478]	Dph7	8.92077	9.8741	9.89376	11.8867	10.9304	10.8881
ENSMUSG00000049709	-0.229686	3.62984	6.99276	0.523225	NLR family, pyrin domain containing 10 [Source:MGI Symbol;Acc:MGI:2444084]	Nlrp10	9.91196	8.88669	9.89376	10.8962	11.924	10.8881
ENSMUSG00000035762	-0.229686	3.62984	7.23028	0.523225	transmembrane protein 161B [Source:MGI Symbol;Acc:MGI:1919995]	Tmem161b	9.91196	9.8741	8.90438	10.8962	10.9304	11.8779
ENSMUSG00000037012	0.179215	9.23864	7.58639	0.0324034	hexokinase 1 [Source:MGI Symbol;Acc:MGI:96103]	Hk1	684.917	618.118	615.392	525.988	583.284	584.988
ENSMUSG00000022772	-0.22939	4.97088	3.65377	0.287546	SUMO/sentrin specific peptidase 5 [Source:MGI Symbol;Acc:MGI:2443596]	Senp5	23.7887	27.6475	29.6813	35.6602	30.8038	28.705
ENSMUSG00000026761	-0.22939	4.97088	3.65377	0.287546	origin recognition complex, subunit 4 [Source:MGI Symbol;Acc:MGI:1347043]	Orc4	23.7887	27.6475	29.6813	35.6602	30.8038	28.705
ENSMUSG00000021832	-0.229349	7.62863	3.03618	0.131045	proteasome (prosome, macropain) 26S subunit, ATPase, 6 [Source:MGI Symbol;Acc:MGI:1914339]	Psmc6	153.635	192.545	194.907	245.659	195.753	193.016
ENSMUSG00000013822	-0.229326	5.65369	1.63687	0.247078	ELF1 homolog, elongation factor 1 [Source:MGI Symbol;Acc:MGI:1913376]	Elof1	50.551	47.3957	35.6175	45.5658	47.6961	63.349
ENSMUSG00000009207	-0.229115	5.06637	1.77268	0.271313	ER junction formation factor 1 [Source:MGI Symbol;Acc:MGI:1918115]	Lnpk1	27.7535	24.6852	34.6282	35.6602	38.7531	27.7152
ENSMUSG00000038116	-0.229115	5.06637	3.70052	0.271313	PHD finger protein 20 [Source:MGI Symbol;Acc:MGI:2444148]	Phf20	27.7535	26.6601	32.6494	35.6602	36.7658	29.6948
ENSMUSG00000039328	-0.22895	3.86046	0.920526	0.485481	ring finger protein 122 [Source:MGI Symbol;Acc:MGI:1916117]	Rnf122	9.91196	9.8741	14.8406	14.8584	15.8987	9.89828
ENSMUSG00000025420	-0.22895	3.86045	2.33876	0.485481	katanin p60 subunit A-like 2 [Source:MGI Symbol;Acc:MGI:1924234]	Katnal2	9.91196	11.8489	12.8619	15.849	12.9177	11.8779
ENSMUSG00000039182	-0.22895	3.86045	3.02667	0.485481	expressed sequence AW209491 [Source:MGI Symbol;Acc:MGI:2145422]	AW209491	9.91196	12.8363	11.8725	14.8584	11.924	13.8576
ENSMUSG00000027160	-0.228665	5.24022	2.34959	0.24213	coiled-coil domain containing 34 [Source:MGI Symbol;Acc:MGI:1915451]	Ccdc34	27.7535	35.5467	35.6175	45.5658	34.7784	35.6338
ENSMUSG00000062270	-0.228665	5.24023	5.12437	0.24213	mortality factor 4 like 1 [Source:MGI Symbol;Acc:MGI:1096551]	Morf4l1	29.7359	35.5467	33.6388	42.5941	35.7721	37.6134
ENSMUSG00000070476	-0.228427	4.05924	3.07157	0.452038	family with sequence similarity 217, member B [Source:MGI Symbol;Acc:MGI:1918782]	Fam217b	11.8944	13.8237	14.8406	17.8301	15.8987	13.8576
ENSMUSG00000025854	-0.228427	4.05924	3.96838	0.452038	family with sequence similarity 20, member C [Source:MGI Symbol;Acc:MGI:2136853]	Fam20c	14.8679	12.8363	12.8619	13.8678	16.8924	16.8271
ENSMUSG00000035944	-0.228427	4.05924	1.69325	0.452038	tetratricopeptide repeat domain 38 [Source:MGI Symbol;Acc:MGI:2146198]	Ttc38	15.8591	12.8363	11.8725	12.8773	15.8987	18.8067
ENSMUSG00000005583	-0.228079	6.63465	27.4948	0.054912	myocyte enhancer factor 2C [Source:MGI Symbol;Acc:MGI:99458]	Mef2c	87.2253	91.8291	90.0332	107.971	103.342	103.932
ENSMUSG00000048720	-0.228037	4.23391	1.89273	0.422064	TBC1D12: TBC1 domain family, member 12 [Source:MGI Symbol;Acc:MGI:2384803]	Tbc1d12	12.8856	16.786	16.8194	21.7923	15.8987	16.8271
ENSMUSG00000020519	-0.228037	4.23392	9.87529	0.422064	SAP30-like [Source:MGI Symbol;Acc:MGI:1354709]	Sap30l	15.8591	14.8111	15.83	17.8301	18.8797	17.8169
ENSMUSG00000038195	-0.228037	4.23392	2.89759	0.422064	Rab interacting lysosomal protein [Source:MGI Symbol;Acc:MGI:2144271]	Rilp	17.8415	13.8237	14.8406	15.849	19.8734	18.8067
ENSMUSG00000039031	-0.227901	5.60069	2.77639	0.184209	Rho GTPase activating protein 18 [Source:MGI Symbol;Acc:MGI:1921160]	Arhgap18	36.6743	45.4208	46.5007	58.4431	46.7025	45.5321
ENSMUSG00000023047	-0.227734	4.38971	4.24354	0.394968	anti-Mullerian hormone type 2 receptor [Source:MGI Symbol;Acc:MGI:105062]	Amhr2	18.8327	15.7986	17.8088	18.8207	22.8544	19.7966
ENSMUSG00000027340	-0.227493	4.53031	10.2999	0.370309	solute carrier family 23 (nucleobase transporters), member 2 [Source:MGI Symbol;Acc:MGI:1859682]	Slc23a2	19.8239	19.7482	18.7981	21.7923	22.8544	23.7559
ENSMUSG00000028345	-0.227278	5.98974	12.4212	0.127995	testis expressed gene 10 [Source:MGI Symbol;Acc:MGI:1344413]	Tex10	53.5246	58.2572	58.3732	70.3298	64.5885	64.3388
ENSMUSG00000061479	-0.227278	5.98973	3.27047	0.127995	small nuclear ribonucleoprotein polypeptide A [Source:MGI Symbol;Acc:MGI:1855690]	Snrpa	57.4894	63.1942	49.4688	65.377	58.6265	75.2269
ENSMUSG00000032064	-0.227132	4.77606	6.59406	0.327008	DIX domain containing 1 [Source:MGI Symbol;Acc:MGI:2679721]	Dixdc1	21.8063	23.6978	24.7344	29.7168	26.8291	25.7355
ENSMUSG00000060475	-0.227132	4.77606	4.12018	0.327008	Wilms tumour 1-associating protein [Source:MGI Symbol;Acc:MGI:1926395]	Wtap	24.7799	24.6852	20.7769	25.7546	25.8354	30.6847
ENSMUSG00000037846	-0.226874	4.986	1.55859	0.290176	rhotekin 2 [Source:MGI Symbol;Acc:MGI:2158417]	Rtkn2	30.7271	21.723	29.6813	27.7357	38.7531	29.6948
ENSMUSG00000022978	-0.226874	4.986	4.00579	0.290176	MIS18 kinetochore protein A [Source:MGI Symbol;Acc:MGI:1913828]	Mis18a	30.7271	24.6852	26.7132	28.7263	34.7784	32.6643
ENSMUSG00000030655	-0.226817	6.37257	3.03556	0.131077	SMG1 homolog, phosphatidylinositol 3-kinase-related kinase (C. elegans) [Source:MGI Symbol;Acc:MGI:1919742]	Smg1	64.4278	76.0305	83.1076	100.047	84.4619	77.2066
ENSMUSG00000035772	-0.226771	5.0805	2.76818	0.273751	mitochondrial ribosomal protein S2 [Source:MGI Symbol;Acc:MGI:2153089]	Mrps2	28.7447	33.5719	25.7238	34.6696	29.8101	38.6033
ENSMUSG00000028382	-0.226586	6.61291	3.98528	0.0919221	polypyrimidine tract binding protein 3 [Source:MGI Symbol;Acc:MGI:1923334]	Ptbp3	77.3133	95.7787	92.012	116.886	94.3986	98.9828
ENSMUSG00000032034	0.176882	8.28592	24.5901	0.00791456	potassium inwardly-rectifying channel, subfamily J, member 5 [Source:MGI Symbol;Acc:MGI:104755]	Kcnj5	327.095	336.707	323.526	293.206	284.19	295.958
ENSMUSG00000049225	-0.226315	5.61048	1.62308	0.248864	pyruvate dehyrogenase phosphatase catalytic subunit 1 [Source:MGI Symbol;Acc:MGI:2685870]	Pdp1	35.6831	42.4586	51.4476	59.4336	50.6772	41.5728
ENSMUSG00000034708	0.176844	9.91772	7.33146	0.0344983	granulin [Source:MGI Symbol;Acc:MGI:95832]	Grn	1063.55	953.838	1055.66	871.693	970.815	875.997
ENSMUSG00000066900	-0.226272	5.6725	3.68265	0.176096	suppressor of defective silencing 3 homolog (S. cerevisiae) [Source:MGI Symbol;Acc:MGI:1919204]	Suds3	41.6302	42.4586	51.4476	57.4525	54.6518	46.5219
ENSMUSG00000005483	-0.226198	5.78904	7.88238	0.158511	DnaJ heat shock protein family (Hsp40) member B1 [Source:MGI Symbol;Acc:MGI:1931874]	Dnajb1	45.595	50.3579	51.4476	62.4053	55.6455	54.4405
ENSMUSG00000026568	-0.226165	5.84397	2.82156	0.150475	mitochondrial pyruvate carrier 2 [Source:MGI Symbol;Acc:MGI:1917706]	Mpc2	43.6126	54.3075	55.4051	69.3392	55.6455	54.4405
ENSMUSG00000027806	-0.225919	6.3406	6.67598	0.0865692	TSC22 domain family, member 2 [Source:MGI Symbol;Acc:MGI:1919283]	Tsc22d2	66.4102	78.0054	74.2032	93.1127	79.4936	83.1455
ENSMUSG00000028945	-0.22589	6.41505	15.9407	0.0785257	Ras homolog enriched in brain [Source:MGI Symbol;Acc:MGI:97912]	Rheb	73.3485	79.9802	77.1713	94.1033	86.4493	89.0845
ENSMUSG00000026728	0.176077	11.0661	10.2121	0.0181768	vimentin [Source:MGI Symbol;Acc:MGI:98932]	Vim	2381.84	2273.02	2162.78	1917.73	2009.2	2107.34
ENSMUSG00000029777	0.176035	9.96733	6.41153	0.0437637	glycyl-tRNA synthetase [Source:MGI Symbol;Acc:MGI:2449057]	Gars	1131.95	992.347	1055.66	876.646	999.632	938.357
ENSMUSG00000029328	-0.225046	6.59084	3.5305	0.108311	heterogeneous nuclear ribonucleoprotein D-like [Source:MGI Symbol;Acc:MGI:1355299]	Hnrnpdl	76.3221	96.7661	88.0545	114.905	90.4239	99.9726
ENSMUSG00000049422	0.174047	9.05696	26.6795	0.00195796	coiled-coil-helix-coiled-coil-helix domain containing 10 [Source:MGI Symbol;Acc:MGI:2143558]	Chchd10	570.929	563.811	553.061	491.318	497.829	506.792
ENSMUSG00000042369	-0.224877	5.95562	16.3529	0.136798	RNA binding motif protein 45 [Source:MGI Symbol;Acc:MGI:2387367]	Rbm45	55.507	57.2698	53.4263	64.3864	62.6012	67.3083
ENSMUSG00000024231	-0.224841	5.85223	2.78882	0.151658	cullin 2 [Source:MGI Symbol;Acc:MGI:1918995]	Cul2	44.6038	57.2698	52.4369	69.3392	52.6645	58.3998
ENSMUSG00000022106	-0.224821	5.79764	13.7116	0.159766	regulator of chromosome condensation (RCC1) and BTB (POZ) domain containing protein 2 [Source:MGI Symbol;Acc:MGI:1917200]	Rcbtb2	51.5422	49.3705	47.49	55.4714	57.6328	60.3795
ENSMUSG00000070436	0.173392	10.894	23.7969	0.00261615	serine (or cysteine) peptidase inhibitor, clade H, member 1 [Source:MGI Symbol;Acc:MGI:88283]	Serpinh1	2056.73	1983.71	2004.48	1752.3	1815.43	1792.58
ENSMUSG00000026154	-0.224692	5.48848	2.33703	0.208595	succinate dehydrogenase complex assembly factor 4 [Source:MGI Symbol;Acc:MGI:1915252]	Sdhaf4	36.6743	46.4083	35.6175	49.528	38.7531	50.4812
ENSMUSG00000031627	-0.224657	5.41783	10.8439	0.22035	interferon regulatory factor 2 [Source:MGI Symbol;Acc:MGI:96591]	Irf2	35.6831	38.509	38.5857	46.5563	42.7278	42.5626
ENSMUSG00000032217	-0.22462	5.34354	2.70444	0.232905	ring finger 111 [Source:MGI Symbol;Acc:MGI:1934919]	Rnf111	30.7271	37.5216	38.5857	48.5375	38.7531	37.6134
ENSMUSG00000031748	-0.224476	5.09451	9.32998	0.276166	guanine nucleotide binding protein, alpha O [Source:MGI Symbol;Acc:MGI:95775]	Gnao1	28.7447	31.5971	28.6919	35.6602	32.7911	35.6338
ENSMUSG00000022019	-0.224414	5.00094	1.52816	0.292778	tudor domain containing 3 [Source:MGI Symbol;Acc:MGI:2444023]	Tdrd3	32.7095	27.6475	22.7556	26.7451	31.7974	38.6033
ENSMUSG00000005687	-0.224359	6.71846	9.01516	0.051778	breast carcinoma amplified sequence 2 [Source:MGI Symbol;Acc:MGI:1915433]	Bcas2	100.111	87.8795	97.9482	105.99	120.234	107.891
ENSMUSG00000020482	-0.224343	4.90088	3.7652	0.310689	coiled-coil domain containing 117 [Source:MGI Symbol;Acc:MGI:2144383]	Ccdc117	27.7535	22.7104	26.7132	27.7357	33.7848	28.705
ENSMUSG00000032446	-0.224045	4.55077	1.5785	0.373927	eomesodermin [Source:MGI Symbol;Acc:MGI:1201683]	Eomes	16.8503	18.7608	23.745	26.7451	23.8481	18.8067
ENSMUSG00000054428	-0.224043	7.95368	3.65919	0.103293	ATPase inhibitory factor 1 [Source:MGI Symbol;Acc:MGI:1196457]	Atpif1	198.239	250.802	231.514	300.14	237.487	257.355
ENSMUSG00000025224	0.172912	7.75526	20.3411	0.0309691	golgi-specific brefeldin A-resistance factor 1 [Source:MGI Symbol;Acc:MGI:1861607]	Gbf1	226.984	221.18	232.503	201.084	206.683	195.986
ENSMUSG00000056917	-0.223901	4.41225	8.18462	0.398941	signal-induced proliferation associated gene 1 [Source:MGI Symbol;Acc:MGI:107576]	Sipa1	16.8503	18.7608	17.8088	21.7923	19.8734	20.7864
ENSMUSG00000060860	-0.223723	4.25901	1.40586	0.426455	ubiquitin-conjugating enzyme E2S [Source:MGI Symbol;Acc:MGI:1925141]	Ube2s	16.8503	12.8363	17.8088	16.8395	22.8544	15.8372
ENSMUSG00000094870	-0.223723	4.259	6.77698	0.426455	zinc finger protein 131 [Source:MGI Symbol;Acc:MGI:1919715]	Zfp131	14.8679	16.786	15.83	19.8112	17.8861	17.8169
ENSMUSG00000016308	-0.223662	5.96327	19.9832	0.137849	ubiquitin-conjugating enzyme E2A [Source:MGI Symbol;Acc:MGI:102959]	Ube2a	54.5158	55.2949	57.3838	66.3676	65.5822	63.349
ENSMUSG00000057113	-0.223305	7.63588	2.31345	0.178077	nucleophosmin 1 [Source:MGI Symbol;Acc:MGI:106184]	Npm1	213.107	173.784	158.3	178.301	218.607	239.538
ENSMUSG00000021944	0.171955	8.2504	6.57366	0.0419066	GATA binding protein 4 [Source:MGI Symbol;Acc:MGI:95664]	Gata4	338.989	323.87	298.792	268.442	281.209	303.877
ENSMUSG00000009079	0.171095	8.00372	10.0177	0.0199055	Ewing sarcoma breakpoint region 1 [Source:MGI Symbol;Acc:MGI:99960]	Ewsr1	283.482	257.714	268.121	227.829	250.405	240.528
ENSMUSG00000041837	-0.223188	3.89288	4.98472	0.490995	programmed cell death 7 [Source:MGI Symbol;Acc:MGI:1859170]	Pdcd7	12.8856	10.8615	11.8725	12.8773	14.905	13.8576
ENSMUSG00000021696	-0.222762	3.66781	1.38391	0.529533	ELOVL family member 7, elongation of long chain fatty acids (yeast) [Source:MGI Symbol;Acc:MGI:1921809]	Elovl7	7.92957	9.8741	11.8725	13.8678	10.9304	9.89828
ENSMUSG00000035919	-0.222588	5.27754	3.33138	0.248411	Bardet-Biedl syndrome 9 (human) [Source:MGI Symbol;Acc:MGI:2442833]	Bbs9	30.7271	38.509	32.6494	43.5847	34.7784	40.5829
ENSMUSG00000020173	-0.222248	6.36392	8.62809	0.089133	cordon-bleu WH2 repeat [Source:MGI Symbol;Acc:MGI:105056]	Cobl	68.3925	76.0305	78.1607	93.1127	84.4619	82.1557
ENSMUSG00000027195	-0.222248	6.36392	19.3285	0.089133	hydroxysteroid (17-beta) dehydrogenase 12 [Source:MGI Symbol;Acc:MGI:1926967]	Hsd17b12	73.3485	77.0179	72.2244	87.1693	83.4683	89.0845
ENSMUSG00000033781	-0.222126	3.40103	2.60306	0.573882	ankyrin repeat and SOCS box-containing 13 [Source:MGI Symbol;Acc:MGI:2145525]	Asb13	8.92077	6.91187	7.91501	7.92448	9.9367	9.89828
ENSMUSG00000019791	-0.222126	3.40102	2.10818	0.573882	histidine triad nucleotide binding protein 3 [Source:MGI Symbol;Acc:MGI:1914097]	Hint3	7.92957	8.88669	6.92563	8.91505	7.94936	10.8881
ENSMUSG00000032258	-0.222126	3.40102	2.07671	0.573882	Leber congenital amaurosis 5 (human) [Source:MGI Symbol;Acc:MGI:1923032]	Lca5	8.92077	7.89928	6.92563	7.92448	8.94303	10.8881
ENSMUSG00000026888	-0.221978	7.83564	3.5525	0.10743	growth factor receptor bound protein 14 [Source:MGI Symbol;Acc:MGI:1355324]	Grb14	182.38	230.066	214.695	277.357	219.601	234.589
ENSMUSG00000021796	-0.221755	4.91673	3.31147	0.313465	bone morphogenetic protein receptor, type 1A [Source:MGI Symbol;Acc:MGI:1338938]	Bmpr1a	23.7887	24.6852	29.6813	32.6885	31.7974	26.7253
ENSMUSG00000048701	-0.221516	5.57596	10.3223	0.200763	coiled-coil domain containing 6 [Source:MGI Symbol;Acc:MGI:1923801]	Ccdc6	44.6038	40.4838	41.5538	46.5563	51.6708	49.4914
ENSMUSG00000020397	-0.221461	4.81042	6.26935	0.333058	mediator complex subunit 7 [Source:MGI Symbol;Acc:MGI:1913463]	Med7	23.7887	22.7104	25.7238	28.7263	29.8101	25.7355
ENSMUSG00000020766	0.171056	8.16423	12.6543	0.013832	galactokinase 1 [Source:MGI Symbol;Acc:MGI:95730]	Galk1	315.2	291.286	298.792	256.555	277.234	270.223
ENSMUSG00000028465	0.168966	10.4961	15.0031	0.00790907	talin 1 [Source:MGI Symbol;Acc:MGI:1099832]	Tln1	1582.94	1484.08	1512.76	1310.51	1396.11	1366.95
ENSMUSG00000039634	-0.221074	3.07345	0.717582	0.626256	zinc finger protein 189 [Source:MGI Symbol;Acc:MGI:2444707]	Zfp189	4.95598	4.93705	7.91501	7.92448	7.94936	4.94914
ENSMUSG00000028347	-0.221074	3.07345	1.88754	0.626256	transmembrane protein with EGF-like and two follistatin-like domains 1 [Source:MGI Symbol;Acc:MGI:1926810]	Tmeff1	4.95598	5.92446	6.92563	7.92448	6.95569	5.93897
ENSMUSG00000032308	-0.221074	3.07344	0.550186	0.626256	unc-51-like kinase 3 [Source:MGI Symbol;Acc:MGI:1918992]	Ulk3	3.96479	7.89928	5.93626	8.91505	4.96835	6.92879
ENSMUSG00000025165	-0.221074	3.07345	9.66669	0.626256	secreted and transmembrane 1A [Source:MGI Symbol;Acc:MGI:2384805]	Sectm1a	5.94718	5.92446	5.93626	6.93392	6.95569	6.92879
ENSMUSG00000035105	-0.221074	3.07345	1.91121	0.626256	egl-9 family hypoxia-inducible factor 3 [Source:MGI Symbol;Acc:MGI:1932288]	Egln3	5.94718	6.91187	4.94688	6.93392	5.96202	7.91862
ENSMUSG00000059820	-0.221074	3.07345	1.91121	0.626256	expressed sequence AU019823 [Source:MGI Symbol;Acc:MGI:2143205]	AU019823	5.94718	6.91187	4.94688	6.93392	5.96202	7.91862
ENSMUSG00000020610	-0.221074	3.07345	1.87683	0.626256	archaelysin family metallopeptidase 2 [Source:MGI Symbol;Acc:MGI:104837]	Amz2	6.93837	5.92446	4.94688	5.94336	6.95569	7.91862
ENSMUSG00000037730	-0.220701	4.57095	6.02872	0.377482	myoneurin [Source:MGI Symbol;Acc:MGI:1931415]	Mynn	18.8327	19.7482	21.7663	24.764	23.8481	21.7762
ENSMUSG00000019143	-0.220701	4.57095	2.09556	0.377482	histidyl-tRNA synthetase 2 [Source:MGI Symbol;Acc:MGI:1918041]	Hars2	23.7887	18.7608	17.8088	19.8112	24.8417	25.7355
ENSMUSG00000028059	0.166915	8.14248	9.73541	0.0200273	rho/rac guanine nucleotide exchange factor (GEF) 2 [Source:MGI Symbol;Acc:MGI:103264]	Arhgef2	313.218	287.336	289.887	250.612	273.259	269.233
ENSMUSG00000037148	-0.220273	6.03402	5.33818	0.133944	Rho GTPase activating protein 10 [Source:MGI Symbol;Acc:MGI:1925764]	Arhgap10	52.5334	61.2194	62.3307	75.2826	65.5822	64.3388
ENSMUSG00000050229	-0.220197	4.43446	0.760356	0.416083	phosphatidylinositol glycan anchor biosynthesis, class M [Source:MGI Symbol;Acc:MGI:1914806]	Pigm	16.8503	13.8237	23.745	21.7923	25.8354	15.8372
ENSMUSG00000009741	-0.220197	4.43445	5.12977	0.402834	upstream binding protein 1 [Source:MGI Symbol;Acc:MGI:104889]	Ubp1	19.8239	16.786	17.8088	19.8112	22.8544	20.7864
ENSMUSG00000015671	0.166279	7.59578	9.17166	0.0497263	proteasome (prosome, macropain) subunit, alpha type 2 [Source:MGI Symbol;Acc:MGI:104885]	Psma2	209.142	191.557	206.78	174.339	190.785	176.189
ENSMUSG00000041697	0.166	9.54502	10.0325	0.0188461	cytochrome c oxidase subunit VIa polypeptide 1 [Source:MGI Symbol;Acc:MGI:103099]	Cox6a1	829.631	769.192	764.788	666.647	718.423	721.584
ENSMUSG00000025958	-0.220023	5.12213	2.10611	0.280926	cAMP responsive element binding protein 1 [Source:MGI Symbol;Acc:MGI:88494]	Creb1	26.7623	28.6349	35.6175	39.6224	36.7658	29.6948
ENSMUSG00000000399	0.165441	8.08137	18.5364	0.0207127	NADH dehydrogenase (ubiquinone) 1 alpha subcomplex, 9 [Source:MGI Symbol;Acc:MGI:1913358]	Ndufa9	292.403	277.462	282.962	246.65	259.348	254.386
ENSMUSG00000030842	-0.219571	4.28366	0.783769	0.430744	late endosomal/lysosomal adaptor, MAPK and MTOR activator 1 [Source:MGI Symbol;Acc:MGI:1913758]	Lamtor1	11.8944	17.7734	18.7981	24.764	15.8987	15.8372
ENSMUSG00000040699	-0.219571	4.28367	2.34734	0.430744	LIM domain containing 2 [Source:MGI Symbol;Acc:MGI:1915053]	Limd2	17.8415	13.8237	16.8194	16.8395	21.8607	17.8169
ENSMUSG00000010609	-0.219571	4.28367	2.19589	0.430744	presenilin 2 [Source:MGI Symbol;Acc:MGI:109284]	Psen2	18.8327	14.8111	14.8406	15.849	19.8734	20.7864
ENSMUSG00000036097	-0.219483	5.83149	16.9757	0.164746	family with sequence similarity 178, member A [Source:MGI Symbol;Acc:MGI:1924968]	Fam178a	52.5334	49.3705	50.4582	57.4525	60.6139	59.3897
ENSMUSG00000067274	-0.21946	7.04306	3.10502	0.127506	ribosomal protein, large, P0 [Source:MGI Symbol;Acc:MGI:1927636]	Rplp0	104.076	133.3	122.683	159.48	124.209	135.606
ENSMUSG00000029020	0.164984	8.20108	20.3836	0.0161632	mitofusin 2 [Source:MGI Symbol;Acc:MGI:2442230]	Mfn2	305.288	316.958	304.728	279.338	268.291	279.131
ENSMUSG00000032777	0.163762	8.79814	22.8203	0.00329094	general transcription factor III C 1 [Source:MGI Symbol;Acc:MGI:107887]	Gtf3c1	476.765	460.133	467.975	411.083	425.291	417.707
ENSMUSG00000000631	0.163723	8.31912	29.804	0.0128781	myosin XVIIIA [Source:MGI Symbol;Acc:MGI:2667185]	Myo18a	337.007	333.744	335.398	298.159	301.082	298.928
ENSMUSG00000025545	-0.219078	6.26523	11.9033	0.105615	citrate lyase beta like [Source:MGI Symbol;Acc:MGI:1916884]	Clybl	71.3661	65.169	71.2351	78.2543	85.4556	78.1964
ENSMUSG00000042213	-0.219	2.64895	0.579793	0.690898	zinc finger, AN1-type domain 4 [Source:MGI Symbol;Acc:MGI:1914742]	Zfand4	2.97359	3.94964	4.94688	5.94336	4.96835	2.96948
ENSMUSG00000017740	-0.219	2.64895	0.822475	0.690898	solute carrier family 12, member 5 [Source:MGI Symbol;Acc:MGI:1862037]	Slc12a5	3.96479	2.96223	4.94688	3.96224	5.96202	3.95931
ENSMUSG00000062991	-0.219	2.64895	1.29271	0.690898	neuregulin 1 [Source:MGI Symbol;Acc:MGI:96083]	Nrg1	2.97359	4.93705	3.9575	4.9528	3.97468	4.94914
ENSMUSG00000087408	-0.219	2.64895	1.29271	0.690898	ceramide synthase 1 [Source:MGI Symbol;Acc:MGI:2136690]	Cers1	2.97359	4.93705	3.9575	4.9528	3.97468	4.94914
ENSMUSG00000035578	-0.219	2.64895	0.819915	0.690898	IQ motif containing G [Source:MGI Symbol;Acc:MGI:1916957]	Iqcg	4.95598	2.96223	3.9575	3.96224	5.96202	3.95931
ENSMUSG00000028613	-0.219	2.64895	3.7568	0.690898	low density lipoprotein receptor-related protein 8, apolipoprotein e receptor [Source:MGI Symbol;Acc:MGI:1340044]	Lrp8	3.96479	3.94964	3.9575	3.96224	4.96835	4.94914
ENSMUSG00000001844	-0.219	2.64895	0.836823	0.690898	zinc finger, DHHC domain containing 4 [Source:MGI Symbol;Acc:MGI:1920131]	Zdhhc4	2.97359	3.94964	4.94688	5.94336	3.97468	3.95931
ENSMUSG00000031980	-0.219	2.64895	3.85041	0.690898	angiotensinogen (serpin peptidase inhibitor, clade A, member 8) [Source:MGI Symbol;Acc:MGI:87963]	Agt	3.96479	3.94964	3.9575	4.9528	3.97468	4.94914
ENSMUSG00000049047	-0.219	2.64895	3.85041	0.690898	armadillo repeat containing, X-linked 3 [Source:MGI Symbol;Acc:MGI:1918953]	Armcx3	3.96479	3.94964	3.9575	4.9528	3.97468	4.94914
ENSMUSG00000030380	-0.219	2.64895	1.25652	0.690898	myeloid zinc finger 1 [Source:MGI Symbol;Acc:MGI:107457]	Mzf1	4.95598	2.96223	3.9575	3.96224	4.96835	4.94914
ENSMUSG00000031600	-0.218732	4.82728	1.47269	0.336022	vacuolar protein sorting 37A [Source:MGI Symbol;Acc:MGI:1261835]	Vps37a	19.8239	27.6475	25.7238	34.6696	24.8417	25.7355
ENSMUSG00000040268	-0.218732	4.82729	12.7282	0.336022	pleckstrin homology domain containing, family A (phosphoinositide binding specific) member 1 [Source:MGI Symbol;Acc:MGI:2442213]	Plekha1	24.7799	24.6852	23.745	28.7263	27.8228	28.705
ENSMUSG00000023921	-0.218476	7.07345	2.12488	0.194207	methylmalonyl-Coenzyme A mutase [Source:MGI Symbol;Acc:MGI:97239]	Mut	102.093	129.351	136.534	168.395	134.145	125.708
ENSMUSG00000027652	-0.218455	5.89287	3.44422	0.157521	Ral GTPase activating protein, beta subunit (non-catalytic) [Source:MGI Symbol;Acc:MGI:2444531]	Ralgapb	46.5862	57.2698	55.4051	70.3298	56.6392	58.3998
ENSMUSG00000051236	-0.218372	6.49907	6.76089	0.0797396	methionine sulfoxide reductase B3 [Source:MGI Symbol;Acc:MGI:2443538]	Msrb3	88.2165	81.955	75.1926	88.1599	94.3986	102.942
ENSMUSG00000041147	-0.218315	5.2212	5.4219	0.267345	breast cancer 2, early onset [Source:MGI Symbol;Acc:MGI:109337]	Brca2	29.7359	33.5719	34.6282	41.6035	36.7658	35.6338
ENSMUSG00000043872	-0.218151	4.71391	6.88562	0.357532	zinc finger, MYM domain containing 1 [Source:MGI Symbol;Acc:MGI:1915560]	Zmym1	22.7975	23.6978	20.7769	25.7546	24.8417	27.7152
ENSMUSG00000078671	-0.218129	6.27141	5.88181	0.106363	chromodomain helicase DNA binding protein 2 [Source:MGI Symbol;Acc:MGI:2448567]	Chd2	67.4014	65.169	76.1819	83.2071	86.4493	73.2472
ENSMUSG00000041084	-0.218034	6.0485	8.58132	0.13591	oligosaccharyltransferase complex subunit (non-catalytic) [Source:MGI Symbol;Acc:MGI:1913607]	Ostc	63.4366	55.2949	59.3626	65.377	73.5316	68.2981
ENSMUSG00000038502	0.162154	8.03218	9.67265	0.0258421	prostate tumor over expressed gene 1 [Source:MGI Symbol;Acc:MGI:1933946]	Ptov1	286.456	275.487	261.195	234.763	244.443	256.365
ENSMUSG00000061613	-0.217713	3.92459	2.29544	0.49633	U2 small nuclear ribonucleoprotein auxiliary factor (U2AF) 1 [Source:MGI Symbol;Acc:MGI:98884]	U2af1	12.8856	10.8615	12.8619	12.8773	16.8924	12.8678
ENSMUSG00000021978	-0.217713	3.92459	2.22164	0.49633	exostoses (multiple)-like 3 [Source:MGI Symbol;Acc:MGI:1860765]	Extl3	11.8944	10.8615	13.8513	14.8584	15.8987	11.8779
ENSMUSG00000022305	-0.217713	3.92459	7.91243	0.49633	low density lipoprotein-related protein 12 [Source:MGI Symbol;Acc:MGI:2443132]	Lrp12	11.8944	12.8363	11.8725	14.8584	13.9114	13.8576
ENSMUSG00000073987	-0.217713	3.92459	7.94526	0.49633	gamma-glutamyl hydrolase [Source:MGI Symbol;Acc:MGI:1329035]	Ggh	11.8944	12.8363	11.8725	13.8678	13.9114	14.8474
ENSMUSG00000026803	-0.217713	3.92459	7.77836	0.49633	transcription termination factor, RNA polymerase I [Source:MGI Symbol;Acc:MGI:105044]	Ttf1	12.8856	11.8489	11.8725	13.8678	13.9114	14.8474
ENSMUSG00000034473	-0.217713	3.92459	0.874238	0.49633	SEC22 homolog A, vesicle trafficking protein [Source:MGI Symbol;Acc:MGI:2447876]	Sec22a	15.8591	10.8615	9.89376	10.8962	14.905	16.8271
ENSMUSG00000022185	-0.217602	8.3989	4.87878	0.0683439	apoptotic chromatin condensation inducer 1 [Source:MGI Symbol;Acc:MGI:1891824]	Acin1	276.544	333.744	320.558	402.168	333.873	346.44
ENSMUSG00000026509	0.161292	7.92358	28.3339	0.0328019	calpain 2 [Source:MGI Symbol;Acc:MGI:88264]	Capn2	256.72	253.764	252.291	225.848	227.55	228.65
ENSMUSG00000020305	-0.217457	4.59085	2.34085	0.380976	ankyrin repeat and SOCS box-containing 3 [Source:MGI Symbol;Acc:MGI:1929749]	Asb3	17.8415	19.7482	23.745	26.7451	23.8481	20.7864
ENSMUSG00000047264	-0.217457	4.59085	1.16314	0.380976	zinc finger protein 358 [Source:MGI Symbol;Acc:MGI:2153740]	Zfp358	24.7799	19.7482	16.8194	18.8207	23.8481	28.705
ENSMUSG00000053774	-0.217412	6.31689	3.1091	0.127301	UBX domain protein 7 [Source:MGI Symbol;Acc:MGI:2146388]	Ubxn7	63.4366	80.9676	71.2351	94.1033	73.5316	83.1455
ENSMUSG00000026490	-0.216878	5.6056	10.8434	0.205483	CDC42 binding protein kinase alpha [Source:MGI Symbol;Acc:MGI:2441841]	Cdc42bpa	41.6302	42.4586	45.5113	51.5092	51.6708	47.5117
ENSMUSG00000027935	-0.216878	5.60559	3.95997	0.205483	RAB13, member RAS oncogene family [Source:MGI Symbol;Acc:MGI:1927232]	Rab13	41.6302	48.3831	39.575	51.5092	44.7151	54.4405
ENSMUSG00000033032	-0.216831	5.31391	5.01254	0.254548	actin filament associated protein 1-like 1 [Source:MGI Symbol;Acc:MGI:2147199]	Afap1l1	35.6831	37.5216	31.66	39.6224	37.7595	44.5422
ENSMUSG00000029267	-0.216615	4.4563	4.33351	0.406652	metal response element binding transcription factor 2 [Source:MGI Symbol;Acc:MGI:105050]	Mtf2	16.8503	19.7482	18.7981	23.7735	19.8734	20.7864
ENSMUSG00000026810	-0.216249	3.7048	2.79148	0.53559	dolichol-phosphate (beta-D) mannosyltransferase 2 [Source:MGI Symbol;Acc:MGI:1330238]	Dpm2	8.92077	9.8741	11.8725	12.8773	11.924	10.8881
ENSMUSG00000030019	-0.216249	3.70481	1.03574	0.53559	F-box and leucine-rich repeat protein 14 [Source:MGI Symbol;Acc:MGI:2141676]	Fbxl14	11.8944	7.89928	10.8831	9.90561	14.905	10.8881
ENSMUSG00000057858	-0.216249	3.70481	1.94381	0.53559	family with sequence similarity 204, member A [Source:MGI Symbol;Acc:MGI:1289174]	Fam204a	11.8944	8.88669	9.89376	9.90561	12.9177	12.8678
ENSMUSG00000027009	-0.216249	3.7048	1.06235	0.53559	integrin alpha 4 [Source:MGI Symbol;Acc:MGI:96603]	Itga4	10.9032	11.8489	7.91501	10.8962	9.9367	14.8474
ENSMUSG00000025937	-0.215745	5.14921	5.80697	0.285596	lactamase, beta 2 [Source:MGI Symbol;Acc:MGI:2442551]	Lactb2	29.7359	33.5719	29.6813	37.6413	32.7911	37.6134
ENSMUSG00000024691	-0.215659	6.5859	8.60758	0.0743617	family with sequence similarity 111, member A [Source:MGI Symbol;Acc:MGI:1915508]	Fam111a	81.2781	92.8165	87.0651	107.971	94.3986	100.962
ENSMUSG00000046201	-0.215645	5.85635	17.7676	0.168436	SR-related CTD-associated factor 8 [Source:MGI Symbol;Acc:MGI:1925212]	Scaf8	50.551	53.3201	51.4476	61.4148	58.6265	60.3795
ENSMUSG00000005683	0.160759	9.68526	7.37551	0.0341236	citrate synthase [Source:MGI Symbol;Acc:MGI:88529]	Cs	921.813	837.323	841.959	729.053	801.891	795.821
ENSMUSG00000041658	-0.215572	4.30792	5.94821	0.434936	Ras-related GTP binding B [Source:MGI Symbol;Acc:MGI:3038613]	Rragb	15.8591	15.7986	17.8088	19.8112	19.8734	17.8169
ENSMUSG00000026824	-0.215572	4.30792	9.44829	0.434936	potassium inwardly-rectifying channel, subfamily J, member 3 [Source:MGI Symbol;Acc:MGI:104742]	Kcnj3	16.8503	16.786	15.83	18.8207	18.8797	19.7966
ENSMUSG00000031109	-0.215266	4.73194	1.86635	0.360696	ecto-NOX disulfide-thiol exchanger 2 [Source:MGI Symbol;Acc:MGI:2384799]	Enox2	18.8327	23.6978	25.7238	30.7074	25.8354	22.766
ENSMUSG00000014504	-0.215266	4.73194	1.70955	0.360696	signal recognition particle 19 [Source:MGI Symbol;Acc:MGI:1913634]	Srp19	24.7799	24.6852	18.7981	23.7735	23.8481	31.6745
ENSMUSG00000007029	0.160556	9.58091	18.6344	0.00476628	valyl-tRNA synthetase [Source:MGI Symbol;Acc:MGI:90675]	Vars	826.658	789.928	802.384	704.289	736.309	723.564
ENSMUSG00000032786	0.158875	7.90979	21.0968	0.0363896	aminolevulinic acid synthase 1 [Source:MGI Symbol;Acc:MGI:87989]	Alas1	251.764	246.852	256.248	225.848	229.538	220.732
ENSMUSG00000030067	-0.214842	5.74532	11.8021	0.187269	forkhead box P1 [Source:MGI Symbol;Acc:MGI:1914004]	Foxp1	45.595	49.3705	48.4794	58.4431	53.6582	54.4405
ENSMUSG00000031960	0.158686	9.82596	6.42266	0.0436327	alanyl-tRNA synthetase [Source:MGI Symbol;Acc:MGI:2384560]	Aars	1018.95	935.077	912.205	801.364	873.436	892.824
ENSMUSG00000031513	-0.214363	5.24651	7.16304	0.271667	leptin receptor overlapping transcript-like 1 [Source:MGI Symbol;Acc:MGI:1915442]	Leprotl1	31.7183	35.5467	32.6494	40.613	35.7721	39.5931
ENSMUSG00000042444	-0.214308	4.61047	0.907444	0.384411	family with sequence similarity 63, member B [Source:MGI Symbol;Acc:MGI:2443086]	Fam63b	15.8591	24.6852	21.7663	30.7074	19.8734	21.7762
ENSMUSG00000038215	-0.214308	4.61048	6.89702	0.384411	centrosomal protein 44 [Source:MGI Symbol;Acc:MGI:3525111]	Cep44	20.8151	19.7482	21.7663	23.7735	25.8354	22.766
ENSMUSG00000032688	-0.214246	4.14249	3.38235	0.466326	MALT1 paracaspase [Source:MGI Symbol;Acc:MGI:2445027]	Malt1	15.8591	14.8111	12.8619	15.849	15.8987	18.8067
ENSMUSG00000032555	-0.214192	6.69335	17.8877	0.0656613	topoisomerase (DNA) II binding protein 1 [Source:MGI Symbol;Acc:MGI:1920018]	Topbp1	90.1989	96.7661	94.9801	113.914	106.323	106.901
ENSMUSG00000040354	0.158353	7.86042	17.7172	0.0403666	methionine-tRNA synthetase [Source:MGI Symbol;Acc:MGI:1345633]	Mars	240.861	249.815	238.44	219.904	211.652	221.721
ENSMUSG00000027424	-0.21409	3.44542	0.382363	0.580887	mitochondrial genome maintainance exonuclease 1 [Source:MGI Symbol;Acc:MGI:1921778]	Mgme1	5.94718	6.91187	11.8725	11.8867	10.9304	5.93897
ENSMUSG00000024317	-0.21409	3.44542	1.48749	0.580887	ring finger protein 138 [Source:MGI Symbol;Acc:MGI:1929211]	Rnf138	7.92957	6.91187	9.89376	9.90561	10.9304	7.91862
ENSMUSG00000059920	-0.21409	3.44541	0.61824	0.580887	RIKEN cDNA 4930453N24 gene [Source:MGI Symbol;Acc:MGI:1914859]	4930453N24Rik	5.94718	10.8615	7.91501	11.8867	6.95569	9.89828
ENSMUSG00000030322	-0.21409	3.44541	1.53314	0.580887	methyl-CpG binding domain protein 4 [Source:MGI Symbol;Acc:MGI:1333850]	Mbd4	6.93837	9.8741	7.91501	10.8962	7.94936	9.89828
ENSMUSG00000038042	-0.21409	3.44542	5.56701	0.580887	protein tyrosine phosphatase domain containing 1 [Source:MGI Symbol;Acc:MGI:2145430]	Ptpdc1	7.92957	8.88669	7.91501	9.90561	8.94303	9.89828
ENSMUSG00000033545	-0.21409	3.44542	0.715598	0.580887	zinc and ring finger 1 [Source:MGI Symbol;Acc:MGI:2177308]	Znrf1	10.9032	6.91187	6.92563	6.93392	10.9304	10.8881
ENSMUSG00000058594	-0.213963	5.81042	3.82314	0.178858	F-box protein 18 [Source:MGI Symbol;Acc:MGI:1354699]	Fbxo18	46.5862	47.3957	56.3944	62.4053	60.6139	51.471
ENSMUSG00000061458	-0.213893	5.62503	2.11446	0.208588	nucleolar protein 10 [Source:MGI Symbol;Acc:MGI:2684913]	Nol10	37.6655	43.446	50.4582	58.4431	50.6772	43.5524
ENSMUSG00000027642	0.15825	9.10839	6.6351	0.0412306	ribophorin II [Source:MGI Symbol;Acc:MGI:98085]	Rpn2	605.621	544.063	590.657	497.261	553.474	508.771
ENSMUSG00000027523	0.157748	10.4629	7.17567	0.0358685	GNAS (guanine nucleotide binding protein, alpha stimulating) complex locus [Source:MGI Symbol;Acc:MGI:95777]	Gnas	1578.98	1435.69	1444.49	1253.06	1377.23	1366.95
ENSMUSG00000060510	-0.212878	5.98221	1.96939	0.20912	zinc finger protein 266 [Source:MGI Symbol;Acc:MGI:1924769]	Zfp266	48.5686	66.1564	55.4051	75.2826	55.6455	66.3184
ENSMUSG00000028005	-0.212876	6.53545	13.046	0.0835722	guanylate cyclase 1, soluble, beta 3 [Source:MGI Symbol;Acc:MGI:1860604]	Gucy1b3	82.2693	88.8669	81.1288	99.0561	92.4113	100.962
ENSMUSG00000004044	0.15176	9.22833	6.49982	0.042739	polymerase I and transcript release factor [Source:MGI Symbol;Acc:MGI:1277968]	Ptrf	662.119	631.942	593.626	537.874	563.411	597.856
ENSMUSG00000029512	-0.2126	6.30792	4.83451	0.110835	unc-51 like kinase 1 [Source:MGI Symbol;Acc:MGI:1270126]	Ulk1	64.4278	74.0557	76.1819	92.1221	79.4936	77.2066
ENSMUSG00000032562	0.151737	7.90186	8.7403	0.046263	guanine nucleotide binding protein (G protein), alpha inhibiting 2 [Source:MGI Symbol;Acc:MGI:95772]	Gnai2	261.676	239.941	247.344	213.961	233.512	226.671
ENSMUSG00000048058	-0.212503	3.95561	0.805116	0.501495	low density lipoprotein receptor class A domain containing 3 [Source:MGI Symbol;Acc:MGI:2138856]	Ldlrad3	9.91196	11.8489	15.83	17.8301	14.905	10.8881
ENSMUSG00000030493	-0.212503	3.95561	2.27896	0.501495	Fanconi anemia core complex associated protein 24 [Source:MGI Symbol;Acc:MGI:2142208]	Faap24	10.9032	12.8363	13.8513	16.8395	13.9114	12.8678
ENSMUSG00000031907	-0.212503	3.95561	7.62544	0.501495	zinc finger protein 90 [Source:MGI Symbol;Acc:MGI:104786]	Zfp90	12.8856	12.8363	11.8725	14.8584	13.9114	14.8474
ENSMUSG00000035776	-0.212458	4.74975	4.79178	0.363814	CD99 antigen-like 2 [Source:MGI Symbol;Acc:MGI:2177151]	Cd99l2	20.8151	23.6978	24.7344	28.7263	26.8291	24.7457
ENSMUSG00000070953	-0.212458	4.74976	3.62864	0.363814	Rab9 effector protein with kelch motifs [Source:MGI Symbol;Acc:MGI:2139530]	Rabepk	25.7711	21.723	21.7663	23.7735	28.8164	27.7152
ENSMUSG00000017550	-0.212441	5.259	3.09573	0.2738	ATPase family, AAA domain containing 5 [Source:MGI Symbol;Acc:MGI:2442925]	Atad5	29.7359	37.5216	33.6388	43.5847	34.7784	38.6033
ENSMUSG00000037795	-0.212432	5.63466	5.5867	0.210129	NEDD4 binding protein 2 [Source:MGI Symbol;Acc:MGI:2684414]	N4bp2	44.6038	40.4838	47.49	50.5186	55.6455	47.5117
ENSMUSG00000026021	-0.211982	4.97846	2.22878	0.324248	small ubiquitin-like modifier 1 [Source:MGI Symbol;Acc:MGI:1197010]	Sumo1	24.7799	25.6726	31.66	34.6696	33.7848	26.7253
ENSMUSG00000025340	-0.211826	5.57096	7.40054	0.221948	RAB guanine nucleotide exchange factor (GEF) 1 [Source:MGI Symbol;Acc:MGI:1929459]	Rabgef1	42.6214	39.4964	44.5219	47.5469	52.6645	46.5219
ENSMUSG00000034274	-0.211796	6.50693	15.4797	0.0883235	THO complex 5 [Source:MGI Symbol;Acc:MGI:1351333]	Thoc5	79.2957	85.9046	82.1182	99.0561	91.4176	96.0133
ENSMUSG00000025887	-0.211719	4.33177	0.865236	0.439034	caspase 12 [Source:MGI Symbol;Acc:MGI:1312922]	Casp12	13.8767	14.8111	21.7663	21.7923	21.8607	14.8474
ENSMUSG00000035125	-0.211719	4.33176	5.50654	0.439034	GC-rich sequence DNA binding factor 2 [Source:MGI Symbol;Acc:MGI:2141656]	Gcfc2	15.8591	17.7734	16.8194	20.8018	17.8861	19.7966
ENSMUSG00000041720	-0.211714	7.74422	2.95683	0.135295	phosphatidylinositol 4-kinase, catalytic, alpha polypeptide [Source:MGI Symbol;Acc:MGI:2448506]	Pi4ka	171.477	199.457	219.641	259.527	222.582	201.925
ENSMUSG00000006517	0.149597	7.95848	9.03223	0.0450556	mevalonate (diphospho) decarboxylase [Source:MGI Symbol;Acc:MGI:2179327]	Mvd	271.588	250.802	256.248	222.876	242.455	236.569
ENSMUSG00000063019	-0.211251	4.62984	3.18384	0.387789	mannosidase, beta A, lysosomal-like [Source:MGI Symbol;Acc:MGI:1916411]	Manbal	22.7975	21.723	18.7981	22.7829	22.8544	27.7152
ENSMUSG00000050965	-0.211178	6.6818	20.8189	0.070681	protein kinase C, alpha [Source:MGI Symbol;Acc:MGI:97595]	Prkca	95.1549	94.7913	90.0332	105.99	106.323	111.851
ENSMUSG00000037503	-0.211011	6.14248	1.85536	0.221122	family with sequence similarity 168, member B [Source:MGI Symbol;Acc:MGI:2448487]	Fam168b	53.5246	72.0809	65.2988	87.1693	63.5949	70.2778
ENSMUSG00000019782	-0.210588	3.12894	3.90439	0.634592	RWD domain containing 1 [Source:MGI Symbol;Acc:MGI:1913771]	Rwdd1	5.94718	5.92446	6.92563	6.93392	7.94936	6.92879
ENSMUSG00000046178	-0.210588	3.12894	4.02064	0.634592	neurexophilin 1 [Source:MGI Symbol;Acc:MGI:107492]	Nxph1	5.94718	6.91187	5.93626	7.92448	6.95569	6.92879
ENSMUSG00000062661	-0.210588	3.12895	3.8643	0.634592	neuronal calcium sensor 1 [Source:MGI Symbol;Acc:MGI:109166]	Ncs1	6.93837	5.92446	5.93626	6.93392	7.94936	6.92879
ENSMUSG00000056367	-0.210111	3.74087	3.22457	0.54141	ARP3 actin-related protein 3B [Source:MGI Symbol;Acc:MGI:2661120]	Actr3b	9.91196	9.8741	11.8725	12.8773	12.9177	10.8881
ENSMUSG00000022420	-0.210111	3.74087	6.56853	0.54141	dynein, axonemal, light chain 4 [Source:MGI Symbol;Acc:MGI:1859217]	Dnal4	9.91196	10.8615	10.8831	12.8773	11.924	11.8779
ENSMUSG00000021376	-0.210111	3.74088	3.20471	0.54141	thiopurine methyltransferase [Source:MGI Symbol;Acc:MGI:98812]	Tpmt	11.8944	9.8741	9.89376	10.8962	12.9177	12.8678
ENSMUSG00000037475	-0.209818	6.69105	5.86071	0.0715802	THO complex 2 [Source:MGI Symbol;Acc:MGI:2442413]	Thoc2	86.2341	93.8039	101.906	117.877	108.31	99.9726
ENSMUSG00000052102	-0.209795	4.49906	2.55869	0.414067	glucosamine-6-phosphate deaminase 1 [Source:MGI Symbol;Acc:MGI:1347054]	Gnpda1	18.8327	16.786	21.7663	21.7923	24.8417	19.7966
ENSMUSG00000008226	-0.209795	4.49905	2.24723	0.414067	secernin 3 [Source:MGI Symbol;Acc:MGI:1921866]	Scrn3	18.8327	21.723	16.8194	22.7829	18.8797	24.7457
ENSMUSG00000025041	-0.209643	7.54315	4.03992	0.0901864	5'-nucleotidase, cytosolic II [Source:MGI Symbol;Acc:MGI:2178563]	Nt5c2	154.627	168.847	189.96	217.923	199.728	176.189
ENSMUSG00000026577	-0.209637	5.18893	1.26462	0.302904	basic leucine zipper nuclear factor 1 [Source:MGI Symbol;Acc:MGI:1201607]	Blzf1	25.7711	32.5845	37.5963	44.5752	35.7721	30.6847
ENSMUSG00000024683	-0.209609	5.36102	2.79766	0.262511	mitochondrial ribosomal protein L16 [Source:MGI Symbol;Acc:MGI:2137219]	Mrpl16	31.7183	40.4838	36.6069	47.5469	37.7595	40.5829
ENSMUSG00000072582	-0.209609	5.36103	15.2215	0.262511	peptidyl-tRNA hydrolase 2 [Source:MGI Symbol;Acc:MGI:2444848]	Ptrh2	36.6743	35.5467	36.6069	41.6035	42.7278	41.5728
ENSMUSG00000025971	-0.209609	5.36102	4.24409	0.262511	RIKEN cDNA 9430016H08 gene [Source:MGI Symbol;Acc:MGI:1915365]	9430016H08Rik	37.6655	38.509	32.6494	40.613	38.7531	46.5219
ENSMUSG00000041417	-0.209502	6.36969	12.1218	0.108267	phosphatidylinositol 3-kinase, regulatory subunit, polypeptide 1 (p85 alpha) [Source:MGI Symbol;Acc:MGI:97583]	Pik3r1	71.3661	78.9928	74.2032	90.141	82.4746	87.1048
ENSMUSG00000029763	0.147474	8.37254	23.5222	0.0224479	exocyst complex component 4 [Source:MGI Symbol;Acc:MGI:1096376]	Exoc4	346.919	348.556	343.313	312.027	311.019	314.765
ENSMUSG00000039219	-0.20889	5.72295	2.71533	0.203361	AT rich interactive domain 4B (RBP1-like) [Source:MGI Symbol;Acc:MGI:2137512]	Arid4b	40.6391	51.3453	49.4688	62.4053	49.6835	51.471
ENSMUSG00000036086	-0.2087	5.28367	8.74388	0.278012	zinc finger, RAN-binding domain containing 3 [Source:MGI Symbol;Acc:MGI:1918362]	Zranb3	32.7095	36.5342	33.6388	40.613	37.7595	40.5829
ENSMUSG00000027184	-0.208451	8.57966	3.38383	0.114449	cell cycle associated protein 1 [Source:MGI Symbol;Acc:MGI:1858234]	Caprin1	313.218	393.976	352.218	456.648	362.689	404.839
ENSMUSG00000025366	-0.208272	6.41784	21.908	0.104363	extended synaptotagmin-like protein 1 [Source:MGI Symbol;Acc:MGI:1344426]	Esyt1	79.2957	76.0305	77.1713	87.1693	91.4176	90.0743
ENSMUSG00000022391	0.144855	9.14539	13.2565	0.0104383	RAN GTPase activating protein 1 [Source:MGI Symbol;Acc:MGI:103071]	Rangap1	599.674	604.295	573.838	529.95	525.651	552.324
ENSMUSG00000024985	-0.207879	5.37255	0.723882	0.426875	transcription factor 7 like 2, T cell specific, HMG box [Source:MGI Symbol;Acc:MGI:1202879]	Tcf7l2	26.7623	44.4334	38.5857	54.4808	33.7848	38.6033
ENSMUSG00000041319	-0.207713	5.85224	3.997	0.185249	THO complex 6 [Source:MGI Symbol;Acc:MGI:2677480]	Thoc6	46.5862	52.3327	56.3944	66.3676	58.6265	54.4405
ENSMUSG00000036103	-0.207678	5.20192	5.20342	0.294674	collectin sub-family member 12 [Source:MGI Symbol;Acc:MGI:2152907]	Colec12	29.7359	34.5593	32.6494	40.613	34.7784	36.6236
ENSMUSG00000006191	-0.207678	5.20192	5.18294	0.294674	CDK5 regulatory subunit associated protein 1-like 1 [Source:MGI Symbol;Acc:MGI:1921765]	Cdkal1	32.7095	34.5593	29.6813	36.6507	34.7784	40.5829
ENSMUSG00000095567	-0.206659	6.42894	25.7337	0.105695	NOC2 like nucleolar associated transcriptional repressor [Source:MGI Symbol;Acc:MGI:1931051]	Noc2l	79.2957	77.0179	78.1607	89.1505	91.4176	90.0743
ENSMUSG00000091898	-0.20664	7.43306	4.27776	0.0831296	troponin C, cardiac/slow skeletal [Source:MGI Symbol;Acc:MGI:98779]	Tnnc1	161.565	172.797	141.481	179.291	166.937	202.915
ENSMUSG00000055184	-0.206624	3.48849	3.77902	0.587545	family with sequence similarity 72, member A [Source:MGI Symbol;Acc:MGI:1919669]	Fam72a	7.92957	8.88669	8.90438	10.8962	9.9367	8.90845
ENSMUSG00000068245	-0.206624	3.48849	1.13937	0.587545	PHD finger protein 11D [Source:MGI Symbol;Acc:MGI:1277133]	Phf11d	9.91196	6.91187	8.90438	7.92448	11.924	9.89828
ENSMUSG00000083282	-0.206624	3.48848	2.62565	0.587545	cathepsin F [Source:MGI Symbol;Acc:MGI:1861434]	Ctsf	7.92957	9.8741	7.91501	9.90561	8.94303	10.8881
ENSMUSG00000068284	-0.206624	3.48848	1.17171	0.587545	upstream transcription factor family member 3 [Source:MGI Symbol;Acc:MGI:2685454]	Usf3	8.92077	9.8741	6.92563	9.90561	7.94936	11.8779
ENSMUSG00000029073	-0.206624	3.48848	0.477509	0.587545	ceramide-1-phosphate transfer protein [Source:MGI Symbol;Acc:MGI:1933107]	Cptp	9.91196	9.8741	5.93626	7.92448	7.94936	13.8576
ENSMUSG00000041747	-0.206523	5.11527	12.8819	0.312624	UTP15 small subunit processome component [Source:MGI Symbol;Acc:MGI:2145443]	Utp15	30.7271	29.6223	30.6707	34.6696	35.7721	34.644
ENSMUSG00000007041	0.142311	8.50297	20.7011	0.0211435	chloride intracellular channel 1 [Source:MGI Symbol;Acc:MGI:2148924]	Clic1	374.672	379.165	381.899	346.696	342.816	339.511
ENSMUSG00000034218	-0.206171	6.39256	9.11861	0.111071	ataxia telangiectasia mutated [Source:MGI Symbol;Acc:MGI:107202]	Atm	72.3573	75.0431	81.1288	92.1221	89.4303	82.1557
ENSMUSG00000068206	-0.206052	4.90882	4.72949	0.35027	protein interacting with C kinase 1 [Source:MGI Symbol;Acc:MGI:894645]	Pick1	23.7887	27.6475	26.7132	32.6885	27.8228	29.6948
ENSMUSG00000029571	-0.205938	5.61049	3.78139	0.228398	transmembrane protein 106B [Source:MGI Symbol;Acc:MGI:1919150]	Tmem106b	41.6302	40.4838	48.4794	52.4997	53.6582	44.5422
ENSMUSG00000040850	-0.205909	7.53287	3.62575	0.104565	proteasome (prosome, macropain) activator subunit 4 [Source:MGI Symbol;Acc:MGI:2143994]	Psme4	149.671	181.683	179.077	221.886	181.842	185.098
ENSMUSG00000031985	-0.205844	6.71844	13.1605	0.0742795	glyceronephosphate O-acyltransferase [Source:MGI Symbol;Acc:MGI:1343460]	Gnpat	91.1901	97.7536	98.9376	116.886	108.31	106.901
ENSMUSG00000041846	-0.205516	6.13235	16.3276	0.147519	SMEK homolog 1, suppressor of mek1 (Dictyostelium) [Source:MGI Symbol;Acc:MGI:1915984]	Smek1	62.4454	62.2068	65.2988	74.292	74.5252	70.2778
ENSMUSG00000024253	-0.205395	4.6678	0.951502	0.394377	dynein cytoplasmic 2 light intermediate chain 1 [Source:MGI Symbol;Acc:MGI:1913996]	Dync2li1	16.8503	24.6852	23.745	31.6979	21.8607	21.7762
ENSMUSG00000020385	-0.205395	4.66781	11.0423	0.394377	CDC like kinase 4 [Source:MGI Symbol;Acc:MGI:1098551]	Clk4	21.8063	21.723	21.7663	25.7546	24.8417	24.7457
ENSMUSG00000025153	0.140191	11.1332	14.5757	0.00844506	fatty acid synthase [Source:MGI Symbol;Acc:MGI:95485]	Fasn	2378.87	2298.69	2381.43	2113.86	2185.08	2106.35
ENSMUSG00000031698	-0.205115	6.31691	24.7609	0.122743	myosin light chain kinase 3 [Source:MGI Symbol;Acc:MGI:2443063]	Mylk3	71.3661	73.0683	72.2244	84.1977	82.4746	83.1455
ENSMUSG00000061436	-0.20509	5.30791	2.92515	0.282154	homeodomain interacting protein kinase 2 [Source:MGI Symbol;Acc:MGI:1314872]	Hipk2	30.7271	38.509	35.6175	45.5658	36.7658	38.6033
ENSMUSG00000020538	0.138465	8.70193	18.4514	0.0162222	sterol regulatory element binding transcription factor 1 [Source:MGI Symbol;Acc:MGI:107606]	Srebf1	440.091	428.536	434.336	390.281	399.455	393.951
ENSMUSG00000024007	-0.204952	5.74976	7.03729	0.207615	peptidylprolyl isomerase (cyclophilin)-like 1 [Source:MGI Symbol;Acc:MGI:1916066]	Ppil1	50.551	49.3705	44.5219	52.4997	54.6518	59.3897
ENSMUSG00000032030	-0.204538	6.13911	3.07857	0.148471	cullin 5 [Source:MGI Symbol;Acc:MGI:1922967]	Cul5	55.507	67.1439	68.2669	83.2071	69.5569	67.3083
ENSMUSG00000033352	-0.204526	5.81465	6.17426	0.198065	mitogen-activated protein kinase kinase 4 [Source:MGI Symbol;Acc:MGI:1346869]	Map2k4	50.551	54.3075	46.5007	57.4525	54.6518	62.3591
ENSMUSG00000021714	-0.204463	4.8019	10.0613	0.372897	centromere protein K [Source:MGI Symbol;Acc:MGI:1926210]	Cenpk	23.7887	24.6852	23.745	27.7357	26.8291	28.705
ENSMUSG00000033713	-0.204417	4.37831	2.8216	0.446963	forkhead box N3 [Source:MGI Symbol;Acc:MGI:1918625]	Foxn3	15.8591	16.786	19.7875	21.7923	20.8671	17.8169
ENSMUSG00000001143	-0.204417	4.3783	2.4461	0.446963	lectin, mannose-binding 2-like [Source:MGI Symbol;Acc:MGI:2443010]	Lman2l	14.8679	18.7608	18.7981	22.7829	18.8797	18.8067
ENSMUSG00000047246	-0.204322	7.50692	3.73248	0.100576	histone cluster 1, H2be [Source:MGI Symbol;Acc:MGI:2448380]	Hist1h2be	148.679	183.658	169.183	214.952	173.892	189.057
ENSMUSG00000035798	-0.204318	3.77607	1.91915	0.547009	zinc finger, DHHC domain containing 17 [Source:MGI Symbol;Acc:MGI:2445110]	Zdhhc17	9.91196	9.8741	12.8619	12.8773	13.9114	10.8881
ENSMUSG00000020988	-0.204318	3.77606	2.78241	0.547009	L-2-hydroxyglutarate dehydrogenase [Source:MGI Symbol;Acc:MGI:2384968]	L2hgdh	9.91196	10.8615	11.8725	13.8678	12.9177	10.8881
ENSMUSG00000046836	-0.204318	3.77606	4.60915	0.547009	BRO1 domain and CAAX motif containing [Source:MGI Symbol;Acc:MGI:1918928]	Brox	11.8944	10.8615	9.89376	11.8867	12.9177	12.8678
ENSMUSG00000012640	-0.204318	3.77606	2.84396	0.547009	zinc finger protein 715 [Source:MGI Symbol;Acc:MGI:1917180]	Zfp715	10.9032	11.8489	9.89376	12.8773	10.9304	13.8576
ENSMUSG00000074896	-0.20392	2.72295	0.771328	0.701325	interferon-induced protein with tetratricopeptide repeats 3 [Source:MGI Symbol;Acc:MGI:1101055]	Ifit3	2.97359	4.93705	4.94688	5.94336	4.96835	3.95931
ENSMUSG00000030337	-0.20392	2.72295	3.43489	0.701325	vesicle-associated membrane protein 1 [Source:MGI Symbol;Acc:MGI:1313276]	Vamp1	3.96479	4.93705	3.9575	4.9528	4.96835	4.94914
ENSMUSG00000034795	-0.20392	2.72295	1.34386	0.701325	coiled-coil domain containing 122 [Source:MGI Symbol;Acc:MGI:1918358]	Ccdc122	3.96479	3.94964	4.94688	5.94336	4.96835	3.95931
ENSMUSG00000036913	-0.20392	2.72295	1.34386	0.701325	tripartite motif-containing 67 [Source:MGI Symbol;Acc:MGI:3045323]	Trim67	3.96479	3.94964	4.94688	5.94336	4.96835	3.95931
ENSMUSG00000028832	-0.20392	2.72295	1.36779	0.701325	stathmin 1 [Source:MGI Symbol;Acc:MGI:96739]	Stmn1	3.96479	4.93705	3.9575	5.94336	3.97468	4.94914
ENSMUSG00000062980	-0.20392	2.72295	1.36779	0.701325	cadherin-like and PC-esterase domain containing 1 [Source:MGI Symbol;Acc:MGI:2444814]	Cped1	3.96479	4.93705	3.9575	5.94336	3.97468	4.94914
ENSMUSG00000070287	-0.20392	2.72295	1.37087	0.701325	solute carrier family 35, member G2 [Source:MGI Symbol;Acc:MGI:2685365]	Slc35g2	3.96479	4.93705	3.9575	4.9528	3.97468	5.93897
ENSMUSG00000044390	-0.20392	2.72295	0.569227	0.701325	tigger transposable element derived 3 [Source:MGI Symbol;Acc:MGI:2681860]	Tigd3	5.94718	3.94964	2.96813	3.96224	4.96835	5.93897
ENSMUSG00000039100	-0.203601	6.88686	17.2932	0.0610234	membrane-associated ring finger (C3HC4) 6 [Source:MGI Symbol;Acc:MGI:2442773]	March6	108.04	112.565	103.884	124.811	120.234	128.678
ENSMUSG00000039959	-0.203601	6.88686	11.6737	0.0610234	huntingtin interacting protein 1 [Source:MGI Symbol;Acc:MGI:1099804]	Hip1	110.023	112.565	101.906	122.83	119.24	131.647
ENSMUSG00000019923	-0.203465	6.70252	8.52884	0.0793555	ZW10 interactor [Source:MGI Symbol;Acc:MGI:1289227]	Zwint	92.1813	101.703	91.0226	112.924	101.354	113.83
ENSMUSG00000030878	-0.203397	4.54058	7.07272	0.421204	cerebellar degeneration-related 2 [Source:MGI Symbol;Acc:MGI:1100885]	Cdr2	20.8151	18.7608	19.7875	21.7923	23.8481	22.766
ENSMUSG00000044098	-0.203397	4.54058	3.48805	0.421204	rosbin, round spermatid basic protein 1 [Source:MGI Symbol;Acc:MGI:2444993]	Rsbn1	21.8063	17.7734	19.7875	20.8018	24.8417	22.766
ENSMUSG00000036023	-0.203397	4.54058	7.22392	0.421204	poly (ADP-ribose) polymerase family, member 2 [Source:MGI Symbol;Acc:MGI:1341112]	Parp2	20.8151	19.7482	18.7981	21.7923	22.8544	23.7559
ENSMUSG00000040446	-0.203046	5.03765	2.47322	0.334538	regulation of nuclear pre-mRNA domain containing 1A [Source:MGI Symbol;Acc:MGI:2385066]	Rprd1a	25.7711	27.6475	32.6494	36.6507	33.7848	28.705
ENSMUSG00000015305	-0.203046	5.03765	3.18787	0.334538	SAM and SH3 domain containing 1 [Source:MGI Symbol;Acc:MGI:1917347]	Sash1	31.7183	28.6349	25.7238	29.7168	32.7911	36.6236
ENSMUSG00000027667	-0.202809	4.01574	0.861359	0.51135	zinc finger protein 639 [Source:MGI Symbol;Acc:MGI:1915028]	Zfp639	16.8503	10.8615	11.8725	11.8867	17.8861	15.8372
ENSMUSG00000027115	-0.202589	4.68643	2.06649	0.397591	kinesin family member 18A [Source:MGI Symbol;Acc:MGI:2446977]	Kif18a	19.8239	20.7356	25.7238	27.7357	26.8291	21.7762
ENSMUSG00000049800	-0.202589	4.68642	5.83811	0.397591	SERTA domain containing 2 [Source:MGI Symbol;Acc:MGI:1931026]	Sertad2	21.8063	23.6978	20.7769	25.7546	23.8481	26.7253
ENSMUSG00000025007	0.137614	8.58899	7.5484	0.0327046	aldehyde dehydrogenase 18 family, member A1 [Source:MGI Symbol;Acc:MGI:1888908]	Aldh18a1	421.258	389.039	393.772	347.687	375.607	371.185
ENSMUSG00000031626	-0.202177	7.97087	4.01426	0.0909958	sorbin and SH3 domain containing 2 [Source:MGI Symbol;Acc:MGI:1924574]	Sorbs2	205.178	246.852	242.397	298.159	248.417	252.406
ENSMUSG00000048175	-0.202175	6.71166	7.81383	0.0802994	ankyrin repeat and SOCS box-containing 8 [Source:MGI Symbol;Acc:MGI:1925791]	Asb8	103.084	90.8417	93.0013	102.028	115.266	112.84
ENSMUSG00000035365	-0.201932	4.81888	2.86431	0.375838	PARP1 binding protein [Source:MGI Symbol;Acc:MGI:1922567]	Parpbp	22.7975	22.7104	27.7025	29.7168	29.8101	24.7457
ENSMUSG00000019303	-0.201932	4.81889	1.30594	0.375838	proteasome (prosome, macropain) 26S subunit, ATPase 3, interacting protein [Source:MGI Symbol;Acc:MGI:1098610]	Psmc3ip	29.7359	21.723	21.7663	22.7829	30.8038	30.6847
ENSMUSG00000021759	-0.201746	4.22121	3.70009	0.479519	phospholipid phosphatase 1 [Source:MGI Symbol;Acc:MGI:108412]	Plpp1	14.8679	14.8111	16.8194	18.8207	18.8797	15.8372
ENSMUSG00000035642	-0.201746	4.2212	1.43219	0.479519	adipogenesis associated Mth938 domain containing [Source:MGI Symbol;Acc:MGI:1913523]	Aamdc	17.8415	15.7986	12.8619	14.8584	17.8861	20.7864
ENSMUSG00000032740	-0.201735	5.63944	1.40887	0.279228	coiled coil domain containing 88A [Source:MGI Symbol;Acc:MGI:1925177]	Ccdc88a	41.6302	38.509	53.4263	54.4808	57.6328	41.5728
ENSMUSG00000010095	0.132096	8.88026	12.4896	0.0146736	solute carrier family 3 (activators of dibasic and neutral amino acid transport), member 2 [Source:MGI Symbol;Acc:MGI:96955]	Slc3a2	481.721	503.579	486.773	456.648	436.221	450.372
ENSMUSG00000026335	-0.201472	10.1131	4.09923	0.0883523	peptidylglycine alpha-amidating monooxygenase [Source:MGI Symbol;Acc:MGI:97475]	Pam	914.874	1075.29	1095.24	1322.4	1123.84	1101.68
ENSMUSG00000019947	-0.201388	4.94018	0.586461	0.472259	AT rich interactive domain 5B (MRF1-like) [Source:MGI Symbol;Acc:MGI:2175912]	Arid5b	18.8327	29.6223	31.66	40.613	26.8291	24.7457
ENSMUSG00000079109	-0.201388	4.94019	5.26374	0.355716	postmeiotic segregation increased 2 (S. cerevisiae) [Source:MGI Symbol;Acc:MGI:104288]	Pms2	26.7623	24.6852	28.6919	30.7074	32.7911	28.705
ENSMUSG00000021706	-0.201241	5.41783	4.13495	0.272129	zinc finger, FYVE domain containing 16 [Source:MGI Symbol;Acc:MGI:2145181]	Zfyve16	34.6919	41.4712	37.5963	47.5469	39.7468	43.5524
ENSMUSG00000032902	0.130759	9.12378	9.39221	0.0215182	solute carrier family 16 (monocarboxylic acid transporters), member 1 [Source:MGI Symbol;Acc:MGI:106013]	Slc16a1	564.982	601.332	576.806	545.799	512.734	533.517
ENSMUSG00000026709	-0.201111	6.06281	22.1354	0.166737	aspartyl-tRNA synthetase 2 (mitochondrial) [Source:MGI Symbol;Acc:MGI:2442510]	Dars2	60.463	60.232	60.3519	69.3392	69.5569	69.2879
ENSMUSG00000091474	-0.201065	3.18238	1.11221	0.642373	RIKEN cDNA 2610021A01 gene [Source:MGI Symbol;Acc:MGI:1922662]	2610021A01Rik	5.94718	5.92446	7.91501	7.92448	8.94303	5.93897
ENSMUSG00000038740	-0.201065	3.18238	0.314578	0.642373	multivesicular body subunit 12B [Source:MGI Symbol;Acc:MGI:1919793]	Mvb12b	4.95598	9.8741	4.94688	7.92448	4.96835	9.89828
ENSMUSG00000028634	-0.201065	3.18238	3.68868	0.642373	human immunodeficiency virus type I enhancer binding protein 3 [Source:MGI Symbol;Acc:MGI:106589]	Hivep3	6.93837	5.92446	6.92563	6.93392	7.94936	7.91862
ENSMUSG00000062785	-0.201065	3.18238	2.21253	0.642373	potassium voltage gated channel, Shaw-related subfamily, member 3 [Source:MGI Symbol;Acc:MGI:96669]	Kcnc3	6.93837	6.91187	5.93626	6.93392	6.95569	8.90845
ENSMUSG00000072494	-0.201065	3.18238	1.11536	0.642373	protein phosphatase 1, regulatory (inhibitor) subunit 3E [Source:MGI Symbol;Acc:MGI:2145790]	Ppp1r3e	7.92957	5.92446	5.93626	5.94336	7.94936	8.90845
ENSMUSG00000029863	-0.20072	6.1659	9.65414	0.152258	caspase 2 [Source:MGI Symbol;Acc:MGI:97295]	Casp2	63.4366	69.1187	62.3307	76.2732	70.5506	77.2066
ENSMUSG00000035632	-0.200631	5.57597	1.74723	0.246433	CCR4-NOT transcription complex, subunit 3 [Source:MGI Symbol;Acc:MGI:2385261]	Cnot3	44.6038	35.5467	47.49	45.5658	57.6328	43.5524
ENSMUSG00000027601	-0.200345	4.56089	1.51442	0.424673	mitochondrial fission regulator 1 [Source:MGI Symbol;Acc:MGI:1914722]	Mtfr1	16.8503	23.6978	19.7875	26.7451	19.8734	22.766
ENSMUSG00000001349	-0.200295	7.04848	5.23723	0.061186	calponin 1 [Source:MGI Symbol;Acc:MGI:104979]	Cnn1	125.882	128.363	109.821	133.726	131.164	153.423
ENSMUSG00000010307	-0.199907	5.34355	3.6373	0.288238	transmembrane protein 86A [Source:MGI Symbol;Acc:MGI:1915143]	Tmem86a	34.6919	33.5719	39.575	42.5941	44.7151	36.6236
ENSMUSG00000021959	-0.199859	4.70481	10.3857	0.400752	large tumor suppressor 2 [Source:MGI Symbol;Acc:MGI:1354386]	Lats2	22.7975	21.723	22.7556	25.7546	25.8354	25.7355
ENSMUSG00000001175	-0.199857	8.53156	3.42478	0.112688	calmodulin 1 [Source:MGI Symbol;Acc:MGI:88251]	Calm1	313.218	386.077	328.473	426.932	346.791	406.819
ENSMUSG00000032478	-0.199669	3.53031	1.99802	0.593883	NME/NM23 nucleoside diphosphate kinase 6 [Source:MGI Symbol;Acc:MGI:1861676]	Nme6	7.92957	8.88669	9.89376	11.8867	9.9367	8.90845
ENSMUSG00000024411	-0.199669	3.53031	0.999614	0.593883	aquaporin 4 [Source:MGI Symbol;Acc:MGI:107387]	Aqp4	10.9032	7.89928	7.91501	7.92448	11.924	10.8881
ENSMUSG00000002489	-0.19956	5.90883	6.73077	0.193987	T cell lymphoma invasion and metastasis 1 [Source:MGI Symbol;Acc:MGI:103306]	Tiam1	54.5158	50.3579	57.3838	61.4148	66.5759	58.3998
ENSMUSG00000021910	0.130022	9.73332	13.0373	0.0108284	nischarin [Source:MGI Symbol;Acc:MGI:1928323]	Nisch	885.138	870.895	906.268	813.25	826.733	792.852
ENSMUSG00000046671	-0.199213	5.58589	3.71084	0.248086	mitochondrial fission regulator 1-like [Source:MGI Symbol;Acc:MGI:1924074]	Mtfr1l	38.6567	46.4083	43.5325	54.4808	44.7151	48.5016
ENSMUSG00000046598	-0.199029	5.65842	7.41101	0.236256	3-hydroxybutyrate dehydrogenase, type 1 [Source:MGI Symbol;Acc:MGI:1919161]	Bdh1	46.5862	42.4586	46.5007	49.528	55.6455	50.4812
ENSMUSG00000038335	-0.198463	6.36392	7.60086	0.128889	TSR1 20S rRNA accumulation [Source:MGI Symbol;Acc:MGI:2144566]	Tsr1	69.3837	77.0179	78.1607	92.1221	83.4683	82.1557
ENSMUSG00000015143	0.125319	10.3053	6.80484	0.0394374	actinin, alpha 1 [Source:MGI Symbol;Acc:MGI:2137706]	Actn1	1377.76	1279.68	1297.07	1155.98	1244.07	1225.41
ENSMUSG00000018651	-0.198417	5.26521	5.66535	0.305557	transcriptional adaptor 2A [Source:MGI Symbol;Acc:MGI:2144471]	Tada2a	31.7183	33.5719	36.6069	41.6035	38.7531	36.6236
ENSMUSG00000040463	0.124412	8.73022	10.2817	0.0291423	MYB binding protein (P160) 1a [Source:MGI Symbol;Acc:MGI:106181]	Mybbp1a	434.144	454.208	434.336	411.083	392.5	409.789
ENSMUSG00000018381	-0.198291	4.04488	2.24256	0.516056	ABI gene family, member 3 [Source:MGI Symbol;Acc:MGI:1913860]	Abi3	11.8944	14.8111	13.8513	17.8301	13.9114	14.8474
ENSMUSG00000032316	-0.198127	6.08403	2.1822	0.189092	CDC-like kinase 3 [Source:MGI Symbol;Acc:MGI:1098670]	Clk3	70.3749	59.2446	54.4157	60.4242	71.5442	79.1862
ENSMUSG00000047749	-0.197902	4.24651	2.6441	0.483697	zinc finger CCCH-type, antiviral 1-like [Source:MGI Symbol;Acc:MGI:2443387]	Zc3hav1l	14.8679	17.7734	14.8406	19.8112	15.8987	18.8067
ENSMUSG00000022812	-0.197727	6.32585	1.50994	0.264255	glycogen synthase kinase 3 beta [Source:MGI Symbol;Acc:MGI:1861437]	Gsk3b	65.419	66.1564	87.0651	92.1221	90.4239	68.2981
ENSMUSG00000062421	-0.197704	5.66782	9.10347	0.237801	ADP-ribosylation factor 2 [Source:MGI Symbol;Acc:MGI:99595]	Arf2	47.5774	43.446	45.5113	49.528	54.6518	52.4609
ENSMUSG00000075467	-0.19761	4.42341	0.497733	0.506428	DNL-type zinc finger [Source:MGI Symbol;Acc:MGI:106559]	Dnlz	22.7975	12.8363	18.7981	15.849	27.8228	18.8067
ENSMUSG00000039376	-0.197517	6.93046	14.3185	0.064957	synaptopodin 2-like [Source:MGI Symbol;Acc:MGI:1916010]	Synpo2l	112.005	116.514	106.853	127.782	123.215	133.627
ENSMUSG00000024240	-0.197384	4.58094	1.03464	0.428079	enhancer of polycomb homolog 1 (Drosophila) [Source:MGI Symbol;Acc:MGI:1278322]	Epc1	19.8239	16.786	24.7344	23.7735	27.8228	18.8067
ENSMUSG00000000532	-0.197056	4.85224	3.06688	0.381595	activin A receptor, type 1B [Source:MGI Symbol;Acc:MGI:1338944]	Acvr1b	27.7535	24.6852	22.7556	25.7546	28.8164	31.6745
ENSMUSG00000018287	-0.196954	6.96327	9.81435	0.0626516	sperm associated antigen 7 [Source:MGI Symbol;Acc:MGI:107380]	Spag7	112.996	121.451	108.831	132.735	123.215	137.586
ENSMUSG00000000581	-0.19683	5.08052	1.73365	0.341953	C1D nuclear receptor co-repressor [Source:MGI Symbol;Acc:MGI:1927354]	C1d	32.7095	24.6852	31.66	30.7074	39.7468	31.6745
ENSMUSG00000034566	-0.196794	6.45901	3.53577	0.119403	ATP synthase, H+ transporting, mitochondrial F0 complex, subunit D [Source:MGI Symbol;Acc:MGI:1918929]	Atp5h	80.2869	87.8795	72.2244	91.1316	82.4746	101.952
ENSMUSG00000044707	-0.196741	5.18239	4.51781	0.324216	cyclin J-like [Source:MGI Symbol;Acc:MGI:2685723]	Ccnjl	29.7359	31.5971	34.6282	39.6224	36.7658	33.6541
ENSMUSG00000049504	-0.196665	5.27754	6.59973	0.307674	proline and serine rich 1 [Source:MGI Symbol;Acc:MGI:1919933]	Proser1	31.7183	35.5467	35.6175	41.6035	38.7531	37.6134
ENSMUSG00000024218	-0.196664	5.27754	3.20555	0.307674	TATA-box binding protein associated factor 11 [Source:MGI Symbol;Acc:MGI:1916026]	Taf11	37.6655	34.5593	30.6707	35.6602	38.7531	43.5524
ENSMUSG00000006932	0.123918	9.87825	9.21379	0.0223522	catenin (cadherin associated protein), beta 1 [Source:MGI Symbol;Acc:MGI:88276]	Ctnnb1	1009.04	977.536	951.78	872.684	900.265	923.509
ENSMUSG00000022360	-0.19645	6.93825	19.5206	0.0656741	ATPase family, AAA domain containing 2 [Source:MGI Symbol;Acc:MGI:1917722]	Atad2	109.032	112.565	115.757	132.735	129.177	124.718
ENSMUSG00000025413	-0.196396	5.67715	13.0105	0.239337	tetratricopeptide repeat domain 4 [Source:MGI Symbol;Acc:MGI:1919604]	Ttc4	44.6038	46.4083	46.5007	54.4808	51.6708	51.471
ENSMUSG00000033161	0.112553	11.4051	8.85088	0.0241865	ATPase, Na+/K+ transporting, alpha 1 polypeptide [Source:MGI Symbol;Acc:MGI:88105]	Atp1a1	2750.57	2869.41	2826.65	2667.58	2555.72	2589.39
ENSMUSG00000017421	-0.196214	7.40664	2.96437	0.134883	zinc finger protein 207 [Source:MGI Symbol;Acc:MGI:1340045]	Zfp207	136.785	170.822	161.268	203.065	162.962	171.24
ENSMUSG00000020594	-0.196148	7.60314	1.82076	0.224959	pumilio RNA-binding family member 2 [Source:MGI Symbol;Acc:MGI:1931751]	Pum2	150.662	187.608	199.854	241.697	193.766	181.138
ENSMUSG00000036109	-0.196111	6.2928	2.89573	0.143407	muscleblind-like 3 (Drosophila) [Source:MGI Symbol;Acc:MGI:2444912]	Mbnl3	65.419	80.9676	67.2776	88.1599	71.5442	85.1252
ENSMUSG00000024604	-0.196065	6.42339	5.70874	0.125497	RNA binding motif protein 22 [Source:MGI Symbol;Acc:MGI:1914060]	Rbm22	80.2869	82.9424	71.2351	87.1693	84.4619	97.0031
ENSMUSG00000024393	0.108036	9.21477	6.06317	0.048145	proline-rich coiled-coil 2A [Source:MGI Symbol;Acc:MGI:1915467]	Prrc2a	591.744	622.068	629.243	592.355	562.417	555.293
ENSMUSG00000022322	-0.19533	6.54824	3.82865	0.110663	Shc SH2-domain binding protein 1 [Source:MGI Symbol;Acc:MGI:1338802]	Shcbp1	77.3133	84.9172	93.9907	106.981	98.3733	88.0947
ENSMUSG00000027531	-0.195232	6.10493	1.03863	0.346692	inositol (myo)-1(or 4)-monophosphatase 1 [Source:MGI Symbol;Acc:MGI:1933158]	Impa1	73.3485	64.1816	49.4688	59.4336	67.5695	87.1048
ENSMUSG00000029684	-0.195219	6.05207	2.77367	0.181147	Wiskott-Aldrich syndrome-like (human) [Source:MGI Symbol;Acc:MGI:1920428]	Wasl	52.5334	63.1942	64.3094	78.2543	64.5885	63.349
ENSMUSG00000038563	-0.195219	6.05207	2.78193	0.181147	elongation factor like GPTase 1 [Source:MGI Symbol;Acc:MGI:2141969]	Efl1	52.5334	64.1816	63.3201	78.2543	63.5949	64.3388
ENSMUSG00000052957	-0.195052	5.54058	3.18738	0.265861	growth arrest specific 1 [Source:MGI Symbol;Acc:MGI:95655]	Gas1	46.5862	40.4838	37.5963	42.5941	48.6898	51.471
ENSMUSG00000053289	-0.194984	5.37831	13.4496	0.294173	DEAD (Asp-Glu-Ala-Asp) box polypeptide 10 [Source:MGI Symbol;Acc:MGI:1924841]	Ddx10	36.6743	36.5342	37.5963	42.5941	42.7278	41.5728
ENSMUSG00000030008	-0.194619	4.74087	2.95246	0.406926	protease-associated domain containing 1 [Source:MGI Symbol;Acc:MGI:1920577]	Pradc1	20.8151	24.6852	23.745	29.7168	23.8481	25.7355
ENSMUSG00000045071	-0.194619	4.74088	9.42652	0.406926	RIKEN cDNA E130308A19 gene [Source:MGI Symbol;Acc:MGI:2442164]	E130308A19Rik	23.7887	22.7104	22.7556	25.7546	26.8291	26.7253
ENSMUSG00000061904	0.107885	9.42958	8.21388	0.0279248	solute carrier family 25 (mitochondrial carrier, phosphate carrier), member 3 [Source:MGI Symbol;Acc:MGI:1353498]	Slc25a3	694.829	720.809	724.223	680.515	654.828	650.317
ENSMUSG00000025190	0.105044	10.0328	9.80083	0.0197589	glutamic-oxaloacetic transaminase 1, soluble [Source:MGI Symbol;Acc:MGI:95791]	Got1	1082.39	1100.96	1067.54	1009.38	991.682	1021.5
ENSMUSG00000020493	-0.194511	4.6007	2.31315	0.431423	proline rich 11 [Source:MGI Symbol;Acc:MGI:2444496]	Prr11	19.8239	18.7608	23.745	24.764	25.8354	20.7864
ENSMUSG00000059851	-0.194511	4.6007	3.41197	0.431423	lysine methyltransferase 5C [Source:MGI Symbol;Acc:MGI:2385262]	Kmt5c	22.7975	18.7608	20.7769	21.7923	25.8354	23.7559
ENSMUSG00000040669	-0.194376	4.44542	2.40621	0.458231	polyhomeotic-like 1 (Drosophila) [Source:MGI Symbol;Acc:MGI:103248]	Phc1	15.8591	19.7482	19.7875	23.7735	19.8734	19.7966
ENSMUSG00000031666	-0.194376	4.44542	5.44456	0.458231	retinoblastoma-like 2 [Source:MGI Symbol;Acc:MGI:105085]	Rbl2	17.8415	17.7734	19.7875	21.7923	21.8607	19.7966
ENSMUSG00000067722	-0.194376	4.44542	1.03447	0.458231	cDNA sequence BC003965 [Source:MGI Symbol;Acc:MGI:2670966]	BC003965	22.7975	16.786	15.83	16.8395	22.8544	23.7559
ENSMUSG00000066036	0.103854	9.69963	10.4574	0.017313	ubiquitin protein ligase E3 component n-recognin 4 [Source:MGI Symbol;Acc:MGI:1916366]	Ubr4	850.446	859.046	868.672	809.288	799.904	789.882
ENSMUSG00000056185	-0.194204	4.27138	0.649069	0.487773	sorting nexin 32 [Source:MGI Symbol;Acc:MGI:2444704]	Snx32	12.8856	20.7356	14.8406	22.7829	13.9114	18.8067
ENSMUSG00000107283	-0.194182	6.00465	11.3515	0.190914	MpV17 mitochondrial inner membrane protein [Source:MGI Symbol;Acc:MGI:97138]	Mpv17	58.4806	60.232	55.4051	65.377	64.5885	69.2879
ENSMUSG00000060961	-0.194079	7.17085	3.64078	0.103991	solute carrier family 4 (anion exchanger), member 4 [Source:MGI Symbol;Acc:MGI:1927555]	Slc4a4	119.935	147.124	130.598	166.414	136.133	152.433
ENSMUSG00000015165	-0.0817466	9.80831	7.09056	0.0370065	heterogeneous nuclear ribonucleoprotein L [Source:MGI Symbol;Acc:MGI:104816]	Hnrnpl	866.306	874.845	866.693	924.193	914.176	921.529
ENSMUSG00000038902	-0.193994	6.59578	2.78958	0.144901	pogo transposable element with ZNF domain [Source:MGI Symbol;Acc:MGI:2442117]	Pogz	77.3133	91.8291	95.9695	114.905	96.386	92.054
ENSMUSG00000006850	-0.193974	4.07345	2.29883	0.520623	transmembrane and coiled-coil domains 6 [Source:MGI Symbol;Acc:MGI:1919233]	Tmco6	12.8856	12.8363	15.83	16.8395	16.8924	13.8576
ENSMUSG00000079215	-0.193974	4.07344	1.18943	0.520623	zinc finger protein 664 [Source:MGI Symbol;Acc:MGI:2442505]	Zfp664	11.8944	16.786	12.8619	17.8301	12.9177	16.8271
ENSMUSG00000027108	-0.193858	6.48051	9.54731	0.122153	Obg-like ATPase 1 [Source:MGI Symbol;Acc:MGI:1914309]	Ola1	81.2781	85.9046	77.1713	93.1127	88.4366	97.9929
ENSMUSG00000074238	-0.193653	3.84397	3.06953	0.557597	adaptor-related protein complex 1 associated regulatory protein [Source:MGI Symbol;Acc:MGI:2384822]	Ap1ar	10.9032	10.8615	12.8619	13.8678	13.9114	11.8779
ENSMUSG00000030987	-0.193653	3.84396	0.435117	0.557597	stromal interaction molecule 1 [Source:MGI Symbol;Acc:MGI:107476]	Stim1	8.92077	15.7986	9.89376	15.849	8.94303	14.8474
ENSMUSG00000030126	-0.193653	3.84397	5.91936	0.557597	transmembrane and coiled coil domains 1 [Source:MGI Symbol;Acc:MGI:2442368]	Tmcc1	11.8944	11.8489	10.8831	12.8773	12.9177	13.8576
ENSMUSG00000039164	-0.193653	3.84397	3.05001	0.557597	nuclear apoptosis inducing factor 1 [Source:MGI Symbol;Acc:MGI:1918504]	Naif1	12.8856	10.8615	10.8831	11.8867	13.9114	13.8576
ENSMUSG00000057230	-0.193572	6.2652	1.44728	0.273392	AP2 associated kinase 1 [Source:MGI Symbol;Acc:MGI:1098687]	Aak1	57.4894	78.9928	73.2138	95.0938	69.5569	75.2269
ENSMUSG00000029804	-0.193525	5.47249	6.09654	0.28139	hect domain and RLD 3 [Source:MGI Symbol;Acc:MGI:1921248]	Herc3	36.6743	40.4838	41.5538	48.5375	43.7215	43.5524
ENSMUSG00000041115	-0.193397	5.38972	1.72819	0.296119	IQ motif and Sec7 domain 2 [Source:MGI Symbol;Acc:MGI:3528396]	Iqsec2	43.6126	33.5719	34.6282	35.6602	46.7025	45.5321
ENSMUSG00000010376	-0.193363	6.98975	7.44904	0.0650552	neural precursor cell expressed, developmentally down-regulated gene 8 [Source:MGI Symbol;Acc:MGI:97301]	Nedd8	121.917	120.464	107.842	127.782	129.177	143.525
ENSMUSG00000039105	-0.193252	5.30189	2.8675	0.311851	ATPase, H+ transporting, lysosomal V1 subunit G1 [Source:MGI Symbol;Acc:MGI:1913540]	Atp6v1g1	33.7007	39.4964	31.66	40.613	35.7721	43.5524
ENSMUSG00000042622	-0.193173	3.57095	4.79706	0.599927	v-maf musculoaponeurotic fibrosarcoma oncogene family, protein F (avian) [Source:MGI Symbol;Acc:MGI:96910]	Maff	9.91196	8.88669	8.90438	9.90561	10.9304	10.8881
ENSMUSG00000050619	-0.193173	3.57095	1.4899	0.599927	zinc finger SCAN domains 29 [Source:MGI Symbol;Acc:MGI:2139317]	Zscan29	8.92077	10.8615	7.91501	10.8962	8.94303	11.8779
ENSMUSG00000041471	-0.193173	3.57095	2.26405	0.599927	family with sequence similarity 35, member A [Source:MGI Symbol;Acc:MGI:1922948]	Fam35a	9.91196	9.8741	7.91501	9.90561	9.9367	11.8779
ENSMUSG00000019952	-0.193173	3.57095	1.4541	0.599927	POC1 centriolar protein B [Source:MGI Symbol;Acc:MGI:1918511]	Poc1b	10.9032	8.88669	7.91501	8.91505	10.9304	11.8779
ENSMUSG00000020048	-0.0897375	10.4863	7.26277	0.0350936	heat shock protein 90, beta (Grp94), member 1 [Source:MGI Symbol;Acc:MGI:98817]	Hsp90b1	1374.79	1410.02	1379.19	1492.77	1453.74	1484.74
ENSMUSG00000020463	-0.192675	5.00093	2.5068	0.366203	SMEK homolog 2, suppressor of mek1 (Dictyostelium) [Source:MGI Symbol;Acc:MGI:2144474]	Smek2	26.7623	31.5971	25.7238	33.6791	27.8228	34.644
ENSMUSG00000045328	-0.192635	7.66547	3.79872	0.0982046	centromere protein E [Source:MGI Symbol;Acc:MGI:1098230]	Cenpe	167.512	192.545	202.822	238.725	207.677	196.976
ENSMUSG00000033059	-0.102215	11.0159	7.72542	0.0313324	brain glycogen phosphorylase [Source:MGI Symbol;Acc:MGI:97828]	Pygb	1956.62	2038.01	1991.61	2186.17	2097.64	2141.99
ENSMUSG00000031360	-0.192576	5.7048	1.50017	0.265649	cytidine 5'-triphosphate synthase 2 [Source:MGI Symbol;Acc:MGI:1933185]	Ctps2	38.6567	49.3705	52.4369	63.3959	49.6835	47.5117
ENSMUSG00000041303	-0.19242	5.63465	6.67706	0.256198	general transcription factor IIIC, polypeptide 3 [Source:MGI Symbol;Acc:MGI:2138383]	Gtf3c3	41.6302	45.4208	46.5007	54.4808	49.6835	48.5016
ENSMUSG00000047446	-0.192414	4.88484	1.5908	0.387192	ADP-ribosylation factor-like 4A [Source:MGI Symbol;Acc:MGI:99437]	Arl4a	21.8063	26.6601	28.6919	34.6696	27.8228	25.7355
ENSMUSG00000000439	-0.192414	4.88484	4.52085	0.387192	makorin, ring finger protein, 2 [Source:MGI Symbol;Acc:MGI:1914277]	Mkrn2	24.7799	24.6852	27.7025	30.7074	30.8038	26.7253
ENSMUSG00000005360	-0.192379	3.23392	1.75571	0.64966	solute carrier family 1 (glial high affinity glutamate transporter), member 3 [Source:MGI Symbol;Acc:MGI:99917]	Slc1a3	7.92957	5.92446	6.92563	6.93392	8.94303	7.91862
ENSMUSG00000041849	-0.192379	3.23391	1.82058	0.64966	caspase recruitment domain family, member 6 [Source:MGI Symbol;Acc:MGI:3032959]	Card6	6.93837	7.89928	5.93626	7.92448	6.95569	8.90845
ENSMUSG00000042557	-0.192332	6.45087	5.79926	0.129097	transcriptional regulator, SIN3A (yeast) [Source:MGI Symbol;Acc:MGI:107157]	Sin3a	73.3485	81.955	84.097	99.0561	88.4366	86.115
ENSMUSG00000068921	-0.192257	7.15923	3.21666	0.122043	death associated protein 3 [Source:MGI Symbol;Acc:MGI:1929538]	Dap3	124.891	148.111	121.693	157.499	132.158	161.342
ENSMUSG00000029207	-0.192022	6.32287	11.7211	0.147584	amyloid beta (A4) precursor protein-binding, family B, member 2 [Source:MGI Symbol;Acc:MGI:108405]	Apbb2	74.3397	75.0431	69.2563	81.226	81.4809	87.1048
ENSMUSG00000031012	-0.191535	5.78041	7.40555	0.233718	calcium/calmodulin-dependent serine protein kinase (MAGUK family) [Source:MGI Symbol;Acc:MGI:1309489]	Cask	46.5862	49.3705	52.4369	59.4336	56.6392	53.4507
ENSMUSG00000018363	-0.191249	4.46711	2.44006	0.461832	SMAD specific E3 ubiquitin protein ligase 2 [Source:MGI Symbol;Acc:MGI:1913563]	Smurf2	16.8503	18.7608	20.7769	23.7735	21.8607	18.8067
ENSMUSG00000038370	-0.191249	4.46711	3.15221	0.461832	Purkinje cell protein 4-like 1 [Source:MGI Symbol;Acc:MGI:1913675]	Pcp4l1	16.8503	19.7482	19.7875	23.7735	20.8671	19.7966
ENSMUSG00000054766	-0.191249	4.46711	0.95137	0.461832	SET nuclear oncogene [Source:MGI Symbol;Acc:MGI:1860267]	Set	14.8679	22.7104	18.7981	25.7546	17.8861	20.7864
ENSMUSG00000078453	-0.191249	4.46711	2.49739	0.461832	ABRA C-terminal like [Source:MGI Symbol;Acc:MGI:1920362]	Abracl	16.8503	20.7356	18.7981	23.7735	18.8797	21.7762
ENSMUSG00000047423	-0.19099	5.12212	3.71088	0.349123	expressed sequence AI837181 [Source:MGI Symbol;Acc:MGI:2147598]	AI837181	31.7183	32.5845	27.7025	33.6791	32.7911	38.6033
ENSMUSG00000032372	-0.190931	6.23707	4.98832	0.16248	phospholipid scramblase 2 [Source:MGI Symbol;Acc:MGI:1270860]	Plscr2	62.4454	73.0683	70.2457	85.1882	73.5316	76.2167
ENSMUSG00000025532	-0.190875	5.57095	7.87562	0.270968	calcitonin gene-related peptide-receptor component protein [Source:MGI Symbol;Acc:MGI:1100818]	Crcp	40.6391	42.4586	44.5219	51.5092	47.6961	46.5219
ENSMUSG00000053985	-0.190811	2.79334	0.19465	0.710726	zinc finger protein 14 [Source:MGI Symbol;Acc:MGI:99160]	Zfp14	3.96479	2.96223	6.92563	4.9528	7.94936	2.96948
ENSMUSG00000036890	-0.190811	2.79334	0.700266	0.710726	glycosyltransferase-like domain containing 1 [Source:MGI Symbol;Acc:MGI:2444269]	Gtdc1	3.96479	3.94964	5.93626	5.94336	5.96202	3.95931
ENSMUSG00000028100	-0.190811	2.79334	2.18236	0.710726	nudix (nucleoside diphosphate linked moiety X)-type motif 17 [Source:MGI Symbol;Acc:MGI:1925623]	Nudt17	3.96479	4.93705	4.94688	5.94336	4.96835	4.94914
ENSMUSG00000029130	-0.190811	2.79334	2.18236	0.710726	ring finger protein 32 [Source:MGI Symbol;Acc:MGI:1861747]	Rnf32	3.96479	4.93705	4.94688	5.94336	4.96835	4.94914
ENSMUSG00000047996	-0.190811	2.79334	2.18236	0.710726	proline rich Gla (G-carboxyglutamic acid) 1 [Source:MGI Symbol;Acc:MGI:1917364]	Prrg1	3.96479	4.93705	4.94688	5.94336	4.96835	4.94914
ENSMUSG00000085957	-0.190811	2.79334	2.18236	0.710726	syncytin a [Source:MGI Symbol;Acc:MGI:2684898]	Syna	3.96479	4.93705	4.94688	5.94336	4.96835	4.94914
ENSMUSG00000096215	-0.190811	2.79334	2.18236	0.710726	small integral membrane protein 22 [Source:MGI Symbol;Acc:MGI:3643379]	Smim22	3.96479	4.93705	4.94688	5.94336	4.96835	4.94914
ENSMUSG00000020785	-0.190811	2.79334	2.1064	0.710726	calcium/calmodulin-dependent protein kinase kinase 1, alpha [Source:MGI Symbol;Acc:MGI:1891766]	Camkk1	4.95598	3.94964	4.94688	4.9528	5.96202	4.94914
ENSMUSG00000042500	-0.190811	2.79334	2.1064	0.710726	argonaute RISC catalytic subunit 4 [Source:MGI Symbol;Acc:MGI:1924100]	Ago4	4.95598	3.94964	4.94688	4.9528	5.96202	4.94914
ENSMUSG00000050545	-0.190811	2.79334	0.714188	0.710726	family with sequence similarity 228, member B [Source:MGI Symbol;Acc:MGI:2442121]	Fam228b	3.96479	5.92446	3.9575	5.94336	3.97468	5.93897
ENSMUSG00000004655	-0.190811	2.79334	2.17002	0.710726	aquaporin 1 [Source:MGI Symbol;Acc:MGI:103201]	Aqp1	4.95598	4.93705	3.9575	4.9528	4.96835	5.93897
ENSMUSG00000007035	-0.190811	2.79334	2.17002	0.710726	mutS homolog 5 [Source:MGI Symbol;Acc:MGI:1329021]	Msh5	4.95598	4.93705	3.9575	4.9528	4.96835	5.93897
ENSMUSG00000026679	-0.190811	2.79334	2.17002	0.710726	enkurin, TRPC channel interacting protein [Source:MGI Symbol;Acc:MGI:1918483]	Enkur	4.95598	4.93705	3.9575	4.9528	4.96835	5.93897
ENSMUSG00000078866	-0.190811	2.79334	0.697719	0.710726	zinc finger protein 970 [Source:MGI Symbol;Acc:MGI:3652255]	Zfp970	5.94718	3.94964	3.9575	3.96224	5.96202	5.93897
ENSMUSG00000022956	-0.102258	9.37476	6.83032	0.0391773	ATP synthase, H+ transporting, mitochondrial F1 complex, O subunit [Source:MGI Symbol;Acc:MGI:106341]	Atp5o	657.163	625.03	633.201	665.657	700.537	689.91
ENSMUSG00000020275	-0.190644	4.29584	6.32914	0.49175	reticuloendotheliosis oncogene [Source:MGI Symbol;Acc:MGI:97897]	Rel	15.8591	16.786	16.8194	19.8112	17.8861	18.8067
ENSMUSG00000029521	-0.190616	5.01573	4.57646	0.368744	checkpoint kinase 2 [Source:MGI Symbol;Acc:MGI:1355321]	Chek2	27.7535	30.6097	26.7132	32.6885	29.8101	34.644
ENSMUSG00000066232	-0.104581	9.22242	7.95448	0.0296689	importin 7 [Source:MGI Symbol;Acc:MGI:2152414]	Ipo7	561.017	573.685	586.7	630.987	617.069	602.805
ENSMUSG00000019795	-0.190589	6.58343	10.5023	0.115015	protein-L-isoaspartate (D-aspartate) O-methyltransferase 1 [Source:MGI Symbol;Acc:MGI:97502]	Pcmt1	92.1813	86.892	84.097	95.0938	100.361	104.922
ENSMUSG00000027770	-0.190586	7.06637	10.2597	0.0617575	DEAH (Asp-Glu-Ala-His) box polypeptide 36 [Source:MGI Symbol;Acc:MGI:1919412]	Dhx36	116.961	123.426	129.608	148.584	140.107	133.627
ENSMUSG00000062866	-0.190301	5.41225	7.52036	0.299963	phosphatase and actin regulator 2 [Source:MGI Symbol;Acc:MGI:2446138]	Phactr2	38.6567	39.4964	35.6175	42.5941	41.7341	45.5321
ENSMUSG00000020022	-0.190205	6.03401	1.46163	0.271258	NADH dehydrogenase (ubiquinone) 1 alpha subcomplex, 12 [Source:MGI Symbol;Acc:MGI:1913664]	Ndufa12	49.5598	68.1313	60.3519	79.2448	57.6328	66.3184
ENSMUSG00000001998	-0.190176	4.90087	3.80935	0.389933	adaptor-related protein complex AP-4, epsilon 1 [Source:MGI Symbol;Acc:MGI:1336993]	Ap4e1	23.7887	26.6601	27.7025	32.6885	28.8164	27.7152
ENSMUSG00000032712	-0.190001	6.42617	3.37888	0.137208	RIKEN cDNA 2810474O19 gene [Source:MGI Symbol;Acc:MGI:1914496]	2810474O19Rik	71.3661	77.0179	87.0651	98.0655	90.4239	80.176
ENSMUSG00000036181	-0.105605	10.356	8.78408	0.0245459	histone cluster 1, H1c [Source:MGI Symbol;Acc:MGI:1931526]	Hist1h1c	1256.84	1287.58	1237.71	1362.02	1328.54	1378.83
ENSMUSG00000022361	-0.189843	4.10146	0.472734	0.525058	zinc fingers and homeoboxes 1 [Source:MGI Symbol;Acc:MGI:109271]	Zhx1	9.91196	15.7986	16.8194	21.7923	13.9114	12.8678
ENSMUSG00000064030	-0.189843	4.10146	6.46159	0.525058	PYM homolog 1, exon junction complex associated factor [Source:MGI Symbol;Acc:MGI:1925678]	Pym1	13.8767	13.8237	14.8406	15.849	16.8924	15.8372
ENSMUSG00000029050	-0.189833	5.65369	2.64188	0.259373	ski sarcoma viral oncogene homolog (avian) [Source:MGI Symbol;Acc:MGI:98310]	Ski	48.5686	47.3957	39.575	47.5469	48.6898	58.3998
ENSMUSG00000026155	-0.189831	6.38401	1.5651	0.256581	small ArfGAP 1 [Source:MGI Symbol;Acc:MGI:2138261]	Smap1	63.4366	83.9298	81.1288	103.018	77.5062	80.176
ENSMUSG00000032336	-0.189792	6.98786	5.21898	0.0703459	neuroplastin [Source:MGI Symbol;Acc:MGI:108077]	Nptn	107.049	125.401	117.736	144.622	123.215	131.647
ENSMUSG00000044201	-0.189651	4.77606	3.47482	0.412907	cell division cycle 25C [Source:MGI Symbol;Acc:MGI:88350]	Cdc25c	21.8063	23.6978	25.7238	29.7168	26.8291	24.7457
ENSMUSG00000090247	-0.189651	4.77605	0.73639	0.423121	biogenesis of lysosomal organelles complex-1, subunit 1 [Source:MGI Symbol;Acc:MGI:1195276]	Bloc1s1	18.8327	29.6223	22.7556	32.6885	20.8671	27.7152
ENSMUSG00000027739	-0.189651	4.77607	2.42436	0.412907	RAB33B, member RAS oncogene family [Source:MGI Symbol;Acc:MGI:1330805]	Rab33b	26.7623	21.723	22.7556	23.7735	29.8101	27.7152
ENSMUSG00000005034	-0.189618	6.51219	3.40603	0.126248	protein kinase, cAMP dependent, catalytic, beta [Source:MGI Symbol;Acc:MGI:97594]	Prkacb	85.2429	74.0557	91.0226	93.1127	105.329	87.1048
ENSMUSG00000062949	-0.189568	5.23392	1.92514	0.333078	ATPase, class VI, type 11C [Source:MGI Symbol;Acc:MGI:1859661]	Atp11c	31.7183	29.6223	38.5857	39.6224	41.7341	32.6643
ENSMUSG00000035107	-0.189538	7.04668	7.97162	0.0650392	discoidin, CUB and LCCL domain containing 2 [Source:MGI Symbol;Acc:MGI:1920629]	Dcbld2	112.996	126.388	125.651	148.584	133.152	134.617
ENSMUSG00000026958	-0.189267	6.43169	3.32195	0.137956	dipeptidylpeptidase 7 [Source:MGI Symbol;Acc:MGI:1933213]	Dpp7	70.3749	79.9802	86.0757	100.047	87.4429	82.1557
ENSMUSG00000069089	-0.18912	5.13574	8.64501	0.351461	cyclin-dependent kinase 7 [Source:MGI Symbol;Acc:MGI:102956]	Cdk7	31.7183	29.6223	31.66	34.6696	36.7658	34.644
ENSMUSG00000042709	-0.18912	5.13574	3.31331	0.351461	ATP synthase mitochondrial F1 complex assembly factor 2 [Source:MGI Symbol;Acc:MGI:2180561]	Atpaf2	33.7007	27.6475	31.66	32.6885	38.7531	34.644
ENSMUSG00000052406	-0.189013	4.63943	2.18952	0.437934	REX4, 3'-5' exonuclease [Source:MGI Symbol;Acc:MGI:2684957]	Rexo4	21.8063	23.6978	18.7981	23.7735	21.8607	27.7152
ENSMUSG00000043091	-0.188981	5.98599	2.43685	0.206056	tubulin, alpha 1C [Source:MGI Symbol;Acc:MGI:1095409]	Tuba1c	63.4366	58.2572	50.4582	58.4431	63.5949	74.2371
ENSMUSG00000027162	-0.188905	5.73194	6.47598	0.248372	lin-7 homolog C (C. elegans) [Source:MGI Symbol;Acc:MGI:1330839]	Lin7c	49.5598	49.3705	44.5219	52.4997	52.6645	58.3998
ENSMUSG00000021555	-0.18874	6.47784	12.6309	0.13267	N(alpha)-acetyltransferase 35, NatC auxiliary subunit [Source:MGI Symbol;Acc:MGI:1925939]	Naa35	78.3045	83.9298	82.1182	97.0749	89.4303	92.054
ENSMUSG00000021579	-0.188733	3.87676	2.6173	0.562608	leucine rich repeat containing 14B [Source:MGI Symbol;Acc:MGI:2145269]	Lrrc14b	11.8944	10.8615	12.8619	13.8678	14.905	11.8779
ENSMUSG00000037355	-0.188733	3.87675	0.893818	0.562608	UV stimulated scaffold protein A [Source:MGI Symbol;Acc:MGI:1918351]	Uvssa	9.91196	14.8111	10.8831	15.849	10.9304	13.8576
ENSMUSG00000041153	-0.188733	3.87675	0.89354	0.562608	oxidative stress induced growth inhibitor family member 2 [Source:MGI Symbol;Acc:MGI:2384798]	Osgin2	10.9032	14.8111	9.89376	13.8678	10.9304	15.8372
ENSMUSG00000039178	-0.1886	5.03038	1.03557	0.371254	TBC1 domain family, member 19 [Source:MGI Symbol;Acc:MGI:1914499]	Tbc1d19	23.7887	27.6475	34.6282	38.6319	32.7911	26.7253
ENSMUSG00000076435	-0.1886	5.03039	4.50312	0.371254	acyl-CoA synthetase family member 2 [Source:MGI Symbol;Acc:MGI:2388287]	Acsf2	29.7359	26.6601	29.6813	31.6979	35.7721	30.6847
ENSMUSG00000039849	-0.1886	5.03039	8.60587	0.371254	PDX1 C-terminal inhibiting factor 1 [Source:MGI Symbol;Acc:MGI:2443858]	Pcif1	29.7359	27.6475	28.6919	31.6979	33.7848	32.6643
ENSMUSG00000041852	-0.188354	5.33766	1.37454	0.317977	transcription factor 20 [Source:MGI Symbol;Acc:MGI:108399]	Tcf20	29.7359	37.5216	40.5644	48.5375	38.7531	35.6338
ENSMUSG00000030641	-0.188221	4.48848	1.43475	0.465359	DNA damage-induced apoptosis suppressor [Source:MGI Symbol;Acc:MGI:1921291]	Ddias	15.8591	20.7356	20.7769	25.7546	19.8734	19.7966
ENSMUSG00000041598	-0.188221	4.48849	3.69064	0.465359	CDC42 effector protein (Rho GTPase binding) 4 [Source:MGI Symbol;Acc:MGI:1929760]	Cdc42ep4	20.8151	17.7734	18.7981	19.8112	22.8544	22.766
ENSMUSG00000032468	-0.18819	5.59085	9.81868	0.274316	armadillo repeat containing 8 [Source:MGI Symbol;Acc:MGI:1921375]	Armc8	41.6302	44.4334	43.5325	51.5092	47.6961	48.5016
ENSMUSG00000031885	-0.188103	6.35232	7.51316	0.151716	core binding factor beta [Source:MGI Symbol;Acc:MGI:99851]	Cbfb	73.3485	71.0935	79.1501	86.1788	89.4303	79.1862
ENSMUSG00000046949	-0.18799	4.91672	6.20581	0.392636	NAD(P)H dehydrogenase, quinone 2 [Source:MGI Symbol;Acc:MGI:104513]	Nqo2	24.7799	27.6475	26.7132	31.6979	28.8164	29.6948
ENSMUSG00000037531	-0.187857	5.24652	3.8004	0.335239	mitochondrial ribosomal protein L47 [Source:MGI Symbol;Acc:MGI:1921850]	Mrpl47	33.7007	30.6097	36.6069	37.6413	41.7341	35.6338
ENSMUSG00000030714	-0.187772	5.51477	5.87876	0.288555	SAGA complex associated factor 29 [Source:MGI Symbol;Acc:MGI:1922815]	Sgf29	43.6126	40.4838	38.5857	43.5847	46.7025	49.4914
ENSMUSG00000052139	-0.187712	5.74085	0.756023	0.41734	brain and reproductive organ-expressed protein [Source:MGI Symbol;Acc:MGI:1333875]	Bre	38.6567	60.232	45.5113	66.3676	42.7278	55.4303
ENSMUSG00000078656	-0.187341	6.48849	5.65108	0.134091	vacuolar protein sorting 25 [Source:MGI Symbol;Acc:MGI:106354]	Vps25	84.2517	86.892	75.1926	91.1316	88.4366	100.962
ENSMUSG00000020783	-0.18733	6.05567	3.06882	0.198812	nuclear cap binding subunit 3 [Source:MGI Symbol;Acc:MGI:1914124]	Ncbp3	56.4982	57.2698	67.2776	73.3015	72.5379	60.3795
ENSMUSG00000029670	-0.187315	5.67249	1.5414	0.262509	inhibitor of growth family, member 3 [Source:MGI Symbol;Acc:MGI:1919027]	Ing3	38.6567	47.3957	51.4476	61.4148	49.6835	45.5321
ENSMUSG00000034563	-0.187315	5.67247	1.1324	0.327404	cell cycle progression 1 [Source:MGI Symbol;Acc:MGI:1196419]	Ccpg1	43.6126	55.2949	38.5857	53.4903	42.7278	60.3795
ENSMUSG00000036676	-0.187262	4.79334	3.85012	0.415828	transmembrane and tetratricopeptide repeat containing 3 [Source:MGI Symbol;Acc:MGI:3036255]	Tmtc3	21.8063	24.6852	25.7238	29.7168	26.8291	25.7355
ENSMUSG00000025572	-0.187214	4.31989	1.0526	0.495632	transmembrane channel-like gene family 6 [Source:MGI Symbol;Acc:MGI:1098686]	Tmc6	16.8503	13.8237	19.7875	18.8207	22.8544	15.8372
ENSMUSG00000022508	-0.187093	3.61048	3.48856	0.605698	B cell leukemia/lymphoma 6 [Source:MGI Symbol;Acc:MGI:107187]	Bcl6	9.91196	9.8741	8.90438	9.90561	10.9304	11.8779
ENSMUSG00000046679	-0.187093	3.61047	0.478087	0.605698	expressed sequence C87436 [Source:MGI Symbol;Acc:MGI:2141787]	C87436	8.92077	12.8363	6.92563	11.8867	7.94936	12.8678
ENSMUSG00000034088	-0.112034	9.71504	6.47101	0.0430698	high density lipoprotein (HDL) binding protein [Source:MGI Symbol;Acc:MGI:99256]	Hdlbp	788.001	837.323	792.49	891.505	837.664	883.916
ENSMUSG00000036782	-0.122961	9.09237	11.0898	0.0153246	kelch-like 13 [Source:MGI Symbol;Acc:MGI:1914705]	Klhl13	530.29	507.529	524.369	557.686	581.297	562.222
ENSMUSG00000022197	-0.186774	7.14923	8.13701	0.0594627	PDZ domain containing 2 [Source:MGI Symbol;Acc:MGI:1922394]	Pdzd2	122.908	131.325	138.513	158.49	148.057	140.556
ENSMUSG00000028163	-0.186728	6.11528	16.9387	0.190781	nuclear factor of kappa light polypeptide gene enhancer in B cells 1, p105 [Source:MGI Symbol;Acc:MGI:97312]	Nfkb1	62.4454	62.2068	64.3094	72.3109	72.5379	70.2778
ENSMUSG00000033237	-0.186628	5.04488	5.90368	0.373734	AT rich interactive domain 2 (ARID, RFX-like) [Source:MGI Symbol;Acc:MGI:1924294]	Arid2	27.7535	30.6097	28.6919	34.6696	30.8038	33.6541
ENSMUSG00000004364	-0.18645	7.09799	3.90146	0.0946745	cullin 3 [Source:MGI Symbol;Acc:MGI:1347360]	Cul3	112.996	133.3	132.576	159.48	135.139	136.596
ENSMUSG00000061130	-0.18638	4.65841	3.412	0.441104	protein phosphatase 1B, magnesium dependent, beta isoform [Source:MGI Symbol;Acc:MGI:101841]	Ppm1b	23.7887	21.723	19.7875	22.7829	24.8417	26.7253
ENSMUSG00000010066	-0.18638	4.65842	1.47783	0.441104	calcium channel, voltage-dependent, alpha 2/delta subunit 2 [Source:MGI Symbol;Acc:MGI:1929813]	Cacna2d2	25.7711	19.7482	19.7875	20.8018	26.8291	26.7253
ENSMUSG00000015090	-0.186257	5.88484	1.91066	0.22931	prostaglandin D2 synthase (brain) [Source:MGI Symbol;Acc:MGI:99261]	Ptgds	45.595	56.2823	58.3732	70.3298	57.6328	54.4405
ENSMUSG00000025979	-0.186082	5.6818	6.2173	0.264062	MOB family member 4, phocein [Source:MGI Symbol;Acc:MGI:104899]	Mob4	43.6126	45.4208	49.4688	55.4714	52.6645	49.4914
ENSMUSG00000009470	-0.186077	6.61778	20.2342	0.119334	transportin 1 [Source:MGI Symbol;Acc:MGI:2681523]	Tnpo1	91.1901	90.8417	88.0545	101.037	101.354	104.922
ENSMUSG00000029686	-0.186002	7.10147	4.56827	0.0754916	cullin 1 [Source:MGI Symbol;Acc:MGI:1349658]	Cul1	114.979	130.338	134.555	158.49	139.114	134.617
ENSMUSG00000021012	-0.185989	6.27445	1.39992	0.280615	zinc finger CCCH type containing 14 [Source:MGI Symbol;Acc:MGI:1919824]	Zc3h14	59.4718	81.955	70.2457	94.1033	68.5632	78.1964
ENSMUSG00000036646	-0.185887	4.12894	3.27746	0.529367	mannosidase, alpha, class 1B, member 1 [Source:MGI Symbol;Acc:MGI:2684954]	Man1b1	13.8767	15.7986	13.8513	17.8301	14.905	16.8271
ENSMUSG00000074170	-0.185887	4.12894	2.15235	0.529367	pleckstrin homology domain containing, family F (with FYVE domain) member 1 [Source:MGI Symbol;Acc:MGI:1919537]	Plekhf1	15.8591	14.8111	12.8619	14.8584	15.8987	18.8067
ENSMUSG00000030204	-0.185825	6.76519	5.58321	0.101336	DEAD (Asp-Glu-Ala-Asp) box polypeptide 47 [Source:MGI Symbol;Acc:MGI:1915005]	Ddx47	106.058	91.8291	101.906	106.981	123.215	110.861
ENSMUSG00000096210	-0.185721	8.81567	2.77242	0.145939	H1 histone family, member 0 [Source:MGI Symbol;Acc:MGI:95893]	H1f0	388.549	475.931	394.761	512.12	417.341	502.832
[truncated: 8,588 more rows]
