# Supplementary material for: m6A-mRNA methylation regulates cardiac gene expression and cellular growth
Source: Life Sci Alliance. 2019 Apr 9;2(2):e201800233. doi: 10.26508/lsa.201800233 (PMC6458851; doi:10.26508/lsa.201800233)
Supplement: Supplementary file 5 [file LSA-2018-00233_TableS5.xlsx]

## Sheet: human
GDPGP1	fw	ACTGAGGACCCACTGGATGT
	rev	TGCTCCAGAAACTCGCAAGG
GJD3	fw	GACACCTCCGACAAAGGACC
	rev	GCCCACCATTTCTCTCACCA
HSPA1A	fw	TGTAACCCCATCATCAGCGG
	rev	CAGCAATCTTGGAAAGGCCCC
HNRNPH2	fw	CGGTATCGTTAGAGCTACACCAA
	rev	CCTTCCGTGCTCAGCATCAT
ZNF324B	fw	CATTTGCTTCCTGTGGCCTTC
	rev	GCTCTGGAGTAGGGACAAGAG
WTAP	fw	CTTCCCAAGAAGGTTCGATTGA
	rev	TCAGACTCTCTTAGGCCAGTTAC
Mettl3	fw	TCTGGGGGTATGAACGGGTA
	rev	CTGGTTGAAGCCTTGGGGAT
Mettl14		AGTGCCGACAGCATTGGTG
	fw	GGAGCAGAGGTATCATAGGAAGC
	rev
FTO		GGAGAATAGCTCCAGACGGG
		AGCTGCCACTGCTGATAGAA
	fw
HPRT1	rev	CCTGGCGTCGTGATTAGTGA
		CGAGCAAGACGTCCAGTCCT
	fw
b-Tubulin	rev	CTCCATGCCACGTTTCTATA
		TTGCCACCTGTGGCTTCATT
b-actin	fw	GTCACCAACTGGGACGACAT
	rev	ACATGATCTGGGTCATCTTCTCG
Mettl3 mutagenessis primer
Mutation 1	fw	GTTGTGATGGCTGCCCCACCCTGGGATATTC
	rev	GAATATCCCAGGGTGGGGCAGCCATCACAAC
Mutation 2	fw	CTGCCCCACCCGCGGATATTCACATGGAAC
	rev	GTTCCATGTGAATATCCGCGGGTGGGGCAG

## Sheet: rat
Arhgef3	fw	CGTCTGTGAGGAGATGGGTT
	rev	GGCCCAGATCTTCTTCCCATT
HPRT	forward	TCAGACCGCTTTTCCCGCGA
	reverse	TCACTAATCACGACGCTGGGACTGAG
Mettl3	forward	ATGTGCAGCCCAACTGGATT
	reverse	CTGTGCTTAAACCGGGCAAC
β-Tubulin	forward
	reverse
BNP	GAACAATCCATGATGCAGAAGC	GCTGTCTCTGAGCCATTTCCT
ANP	TACAGTGCGGTGTCCAACACAGAT	TGGGCTCAATCCTGTCAATCCTA
FTO	GCGGGAAGCTAAGAAACTGAG
HPRT 1	TCAGACCGCTTTTCCCGCGA
ß_Tubulin	TCGTGGAATGGATCCCCAAC	CTCCATCTCGTCCATGCCCT

## Sheet: mouse
Arhgef3	forward	GAGGAGATGGGTTTTTGCTGC
	reverse	TGGAGGAAGTCCTGCACTCT
ANF	TTGTGGTGTGTCACGCAGCT	TGTTCACCACGCCACAGTG
BNP-3	TTTGGGCTGTAACGCACTG	CACTTCAAAGGTGGTCCCAGA
18S	Fmr CGAGCCGCCTGGATACC	Rmr catggcctcagttccgaaaa
bActin2	ACTGTCGAGTCGCGTCCA	ATCCATGGCGAACTGGTGG
HPRT2	CTTCCTCCTCAGACCGCTTT	TCGCTAATCACGACGCTGG
Col 1a1	GCTCCTCTTAGGGGCCACT	CCACGTCTCACCATGGGGG

## Sheet: anitbodies
Flag: HRP conjugate	rabbit	0.736111	Cell Signaling Tech., Danvers (USA)	2044
GAPDH	mouse	3.51389	Santa Cruz Biotechnology, Dallas (USA)	sc-365062
Mettl3	rabbit	1.43056	Cell Signaling Tech., Danvers (USA)	96391
Peroxidase-AffiniPure	donkey	1:10,000	Jackson Immuno Research, Cambridgeshire (UK)	715035151
Donkey Anti-Mouse
Peroxidase-AffiniPure	goat	1:10,000	Jackson Immuno Research, Cambridgeshire (UK)	111035144
Goat Anti-Rabbit
Biotin linked anti-rb	donkey	1.43056	Abcam, Cambridge (UK)	ab6801
Desmin	rabbit	0.111111	Abcam, Cambridge (UK)	ab1520
Flag	mouse	0.111111	Sigma Aldrich/Merck, Darmstadt (Germany)	F1804
Mettl3	rabbit	0.111111	Cell Signaling Tech., Danvers (USA)	96391
Phalloidin: Alexa FluorTM 555 conjugate	n/a	01:25:00	Thermo Fisher Scientific, Waltham (US)	A34055
Wheat Germ Agglutinin: Oregon GreenTM conjugate	n/a	01:50:00	Thermo Fisher Scientific, Waltham (US)	W6748
